# Supplementary material for: The Leipzig Catalogue of Vascular Plants (LCVP) – An improved taxonomic reference list for all known vascular plants
Source: bioRxiv or medRxiv preprint supplement (doi:10.1101/2020.05.08.077149), 2020-05-09
Supplement: Supplementary file [file media-3.pdf]

**Freiberg et al: The Leipzig Catalogue of Plants (LCVP) - An improved taxonomic reference list for all known vascular plants**

**Supplementary file 3: Literature used to compile LCVP ordered by plant families**

## Acanthaceae

AROLLA, RAJENDER GOUD; CHERUKUPALLI, NEERAJA; KHAREEDU, VENKATESWARA RAO; VUDEM, DASHAVANTHA REDDY (2015):

**DNA barcoding and haplotyping in different Species of *Andrographis*.**

In: Biochemical Systematics and Ecology 62, p. 91–97. DOI: 10.1016/j.bse.2015.08.001.

BORG, AGNETA JULIA; MCDADE, LUCINDA A.; SCHÖNENBERGER, JÜRGEN (2008):

**Molecular Phylogenetics and morphological Evolution of Thunbergioideae (Acanthaceae).**

In: Taxon 57 (3), p. 811–822. DOI: 10.1002/tax.573012.

CARINE, MARK A.; SCOTLAND, ROBERT W. (2002):

**Classification of Strobilanthisae (Acanthaceae): Trying to Classify the Unclassifiable?**

In: Taxon 51 (2), p. 259–279. DOI: 10.2307/1554926.

CÔRTEZ, ANA LUIZA A.; DANIEL, THOMAS F.; RAPINI, ALESSANDRO (2016):

**Taxonomic Revision of the Genus *Schaueria* (Acanthaceae).**

In: Plant Systematics and Evolution 302 (7), p. 819–851. DOI: 10.1007/s00606-016-1301-y.

CÔRTEZ, ANA LUIZA A.; RAPINI, ALESSANDRO; DANIEL, THOMAS F. (2015):

**The Tetramerium Lineage (Acanthaceae: Justiceae) does not support the Pleistocene Arc Hypothesis for South American seasonally dry Forests.**

In: American Journal of Botany 102 (6), p. 992–1007. DOI: 10.3732/ajb.1400558.

DANIEL, THOMAS F.; MCDADE, LUCINDA A. (2014):

**Nelsonioideae (Lamiales: Acanthaceae): Revision of Genera and Catalog of Species.**

In: Aliso 32 (1), p. 1–45. DOI: 10.5642/aliso.20143201.02.

EZCURRA, CECILIA (2002):

**El Género *Justicia* (Acanthaceae) en Sudamérica Austral.**

In: Annals of the Missouri Botanical Garden 89, p. 225–280.

FISHER, AMANDA E.; MCDADE, LUCINDA A.; KIEL, CARRIE A.; KHOSHRAVESH, ROXANNE; JOHNSON, MELISSA A.; STATA, MATT ET AL. (2015):

**Evolutionary History of *Blepharis* (Acanthaceae) and the Origin of C 4 Photosynthesis in Section *Acanthodium*.**

In: International Journal of Plant Sciences 176 (8), p. 770–790. DOI: 10.1086/683011.

GNANASEKARAN, G.; MURTHY, G.V.S.; DENG, YUN-FEI (2016):

**Resurrection of the Genus *Haplanthus* (Acanthaceae: Andrographinae).**

In: Blumea 61 (3), p. 165–169. DOI: 10.3767/000651916X693185.

GRAHAM, VICTORIA A. W. (1988):

**Delimitation and Infra-Generic Classification of *Justicia* (Acanthaceae).**

In: Kew Bulletin 43 (4), p. 551–624.

HILSENBECK, RICHARD A. (1990):

**Systematics of *Justicia* Sect. *Pentaloba* (Acanthaceae).**

In: Plant Systematics and Evolution 169, p. 219–235.

KIEL, CARRIE A.; MCDADE, LUCINDA A.; DANIEL, THOMAS F.; CHAMPLUVIER, DOMINIQUE (2006):

**Phylogenetic Delimitation of Isoglossinae (Acanthaceae: Justiceae) and Relationships among constituent Genera.**

In: Taxon 55 (3), p. 683–694. DOI: 10.2307/25065644.

- MANKTELOW, MARIETTE; MCDADE, LUCINDA A.; OXELMAN, BENGT; FURNESS, CAROL A.; BALKWILL, MANDY-JANE (2001):**  
**The Enigmatic Tribe Whitfieldieae (Acanthaceae): Delimitation and phylogenetic Relationships based on molecular and morphological Data.**  
In: Systematic Botany 26 (1), p. 104–119.
- MCDADE, LUCINDA A.; DANIEL, THOMAS F.; KIEL, CARRIE A. (2008):**  
**Toward a comprehensive Understanding of phylogenetic Relationships among Lineages of Acanthaceae s.l. (Lamiales).**  
In: American Journal of Botany 95 (9), p. 1136–1152. DOI: 10.3732/ajb.0800096.
- MCDADE, LUCINDA A.; DANIEL, THOMAS F.; KIEL, CARRIE A.; BORG, AGNETA JULIA (2012):**  
**Phylogenetic placement, Delimitation, and Relationships among Genera of the enigmatic Nelsonioideae (Lamiales: Acanthaceae).**  
In: Taxon 61 (3), p. 637–651. DOI: 10.1002/tax.613012.
- MCDADE, LUCINDA A.; DANIEL, THOMAS F.; KIEL, CARRIE A.; VOLLESEN, KAJ (2005):**  
**Phylogenetic Relationships among Acantheae (Acanthaceae): Major Lineages Present Contrasting Patterns of molecular Evolution and morphological Differentiation.**  
In: Systematic Botany 30 (4), p. 834–862.
- MCDADE, LUCINDA A.; MASTA, SUSAN E.; MOODY, MICHAEL L.; WATERS, ELIZABETH (2000):**  
**Phylogenetic Relationships among Acanthaceae: Evidence from Two Genomes.**  
In: Systematic Botany 25 (1), p. 106–121. DOI: 10.2307/2666677.
- MCDADE, LUCINDA A.; MOODY, MICHAEL L. (1999):**  
**Phylogenetic Relationships among Acanthaceae: Evidence from noncoding trnL-trnF Chloroplast DNA Sequences.**  
In: American Journal of Botany 86 (1), p. 70–80. DOI: 10.2307/2656956.
- MOYLAN, ELIZABETH C.; BENNETT, JONATHAN R.; CARINE, MARK A.; OLMSTEAD, RICHARD G.; SCOTLAND, ROBERT W. (2004):**  
**Phylogenetic Relationships among *Strobilanthes* s.l. (Acanthaceae): Evidence from ITS nrDNA, trnL-F cpDNA, and Morphology.**  
In: American Journal of Botany 91 (5), p. 724–735. DOI: 10.3732/ajb.91.5.724.
- ONJALALAINA, GUY ERIC; DARBYSHIRE, IAIN (2016):**  
**An endangered new Species of *Podorungia* (Acanthaceae), with Notes on the Tribe Barlerieae in Madagascar.**  
In: Kew Bulletin 71 (3), p. 117. DOI: 10.1007/S12225-016-9657-2.
- SCHMIDT-LEBUHN, ALEXANDER N. (2005):**  
**Evolution of (Acanthaceae) inferred from Morphology, AFLP Data, and ITS rDNA Sequences.**  
In: Organisms Diversity and Evolution 5 (1), p. 1–13. DOI: 10.1016/j.ode.2004.04.006.
- SCHWARZBACH, ANDREA E.; MCDADE, LUCINDA A. (2002):**  
**Phylogenetic Relationships of the Mangrove Family Avicenniaceae based on Chloroplast and Nuclear Ribosomal DNA Sequences.**  
In: Systematic Botany 27 (1), p. 84–98.
- TRIPP, ERIN A. (2007):**  
**Evolutionary Relationships within the Species-Rich Genus *Ruellia* (Acanthaceae).**  
In: Systematic Botany 32 (3), p. 628–649.

TRIPP, ERIN A.; DANIEL, THOMAS F.; FATIMAH, SITI; MCDADE, LUCINDA A. (2013):

**Phylogenetic Relationships within Ruellieae (Acanthaceae) and a revised Classification.**

In: International Journal of Plant Sciences 174 (1), p. 97–137. DOI: 10.1086/668248.

TRIPP, ERIN A.; DANIEL, THOMAS F.; LENDEMER, JAMES C.; MCDADE, LUCINDA A. (2009):

**New molecular and morphological Insights prompt transfer of *Blechum* to *Ruellia* (Acanthaceae).**

In: Taxon 58 (3), p. 893–906. DOI: 10.1002/tax.583017.

TRIPP, ERIN A.; DARBYSHIRE, IAIN (2017):

**Phylogenetic Relationships among Old World *Ruellia* L.: A new Classification and Reinstatement of the Genus *Dinteracanthus* Schinz.**

In: Systematic Botany 42 (3), p. 470–483. DOI: 10.1600/036364417X695961.

TRIPP, ERIN A.; FATIMAH, SITI (2012):

**Comparative Anatomy, Morphology, and molecular Phylogenetics of the African Genus *Satanocrater* (Acanthaceae).**

In: American Journal of Botany 99 (6), p. 967–982. DOI: 10.3732/ajb.1100354.

TRIPP, ERIN A.; MCDADE, LUCINDA A. (2012):

**New synonymies for *Ruellia* (Acanthaceae) of Costa Rica and Notes on other Neotropical Species.**

In: Brittonia 64 (3), p. 305–317. DOI: 10.1007/s12228-012-9244-2.

WASSSHAUSEN, DIETER C. (1992):

**New Species and new Combinations of *Justicia* (Acanthaceae) from the Venezuelan Guayana.**

In: Novon: A Journal for Botanical Nomenclature 2 (1), p. 62–80.

## Achariaceae

CHASE, MARK W.; ZMARZTY, SUE; LLEDÓ, M. DOLORES; WURDACK, KENNETH J.J.; SWENSEN, SUSAN M.; FAY, MICHAEL F. (2002):

**When in Doubt, put It in Flacourtiaceae: A molecular phylogenetic Analysis based on Plastid *rbcl* DNA Sequences.**

In: Kew Bulletin 57, p. 141–181.

GROPPA, MILTON; FIASCHI, PEDRO; SALATINO, MARIA LUIZA FARIA; CECCANTINI, GREGÓRIO CARDOSO TÁPIAS; ASSIS RIBEIRO DOS SANTOS, FRANCISCO; VEROLA, CHRISTIANO FRANCO; ANTONELLI, ALEXANDRE (2010):

**Placement of *Kuhlmanniodendron* Fiaschi & Groppo in Lindackerieae (Achariaceae, Malpighiales) confirmed by Analyses of *rbcl* Sequences, with Notes on Pollen Morphology and wood Anatomy.**

In: Plant Systematics and Evolution 286 (1-2), p. 27–37. DOI: 10.1007/s00606-010-0276-3.

WEBBER, BRUCE L.; MILLER, REBECCA E. (2008):

**Gynocardin from *Baileyoxyton lanceolatum* and a Revision of cyanogenic Glycosides in Achariaceae.**

In: Biochemical Systematics and Ecology 36 (7), p. 545–553. DOI: 10.1016/j.bse.2008.03.011.

## Actinidiaceae

CHAT, JOËLLE; JÁUREGUI, BLANCA; PETIT, RÉMY J.; NADOT, SOPHIE (2004):

**Reticulate Evolution in kiwifruit (*Actinidia*, Actinidiaceae) identified by comparing their maternal and paternal Phylogenies.**

In: American Journal of Botany 91 (5), p. 736–747. DOI: 10.3732/ajb.91.5.736.

**SHI, TAO; HUANG, HONGWEN; BARKER, MICHAEL P. (2010):**

**Ancient Genome duplications during the Evolution of Kiwifruit (*Actinidia*) and related Ericales.**

In: Annals of Botany 106 (3), p. 497–504. DOI: 10.1093/aob/mcq129.

**YAO, XIAOHONG; LIU, LEI; YAN, MINGKE; LI, DAWEI; ZHONG, CAIHONG; HUANG, HONGWEN (2015):**

**Exon primed Intron-crossing (Epic) Markers reveal natural Hybridization and Introgression in *Actinidia* (Actinidiaceae) with sympatric Distribution.**

In: Biochemical Systematics and Ecology 59, p. 246–255. DOI: 10.1016/j.bse.2015.01.023.

## **Adoxaceae**

**JACOBS, BART; HUYSMANS, SUZY; SMETS, ERIK (2010):**

**Evolution and systematic value of Fruit and Seed Characters in Adoxaceae (Dipsacales).**

In: Taxon 59 (3), p. 850–865.

## **Agavaceae**

**ALTHOFF, DAVID M.; SEGRAVES, KARI A.; SMITH, CHRISTOPHER I.; LEEBENS-MACK, JAMES H.; PELLMYR, OLLE (2012):**

**Geographic isolation trumps CoEvolution as a Driver of *Yucca* and *Yucca*-moth Diversification.**

In: Molecular Phylogenetics and Evolution 62 (3), p. 898–906. DOI: 10.1016/j.ympev.2011.11.024.

**ARCHIBALD, JENNY K.; KEPHART, SUSAN R.; THEISS, KATHRYN E.; PETROSKY, ANNA L.; CULLEY, THERESA M. (2015):**

**Multilocus phylogenetic Inference in Subfamily Chlorogaloideae and related Genera of Agavaceae - informing questions in Taxonomy at multiple ranks.**

In: Molecular Phylogenetics and Evolution 84, p. 266–283. DOI: 10.1016/j.ympev.2014.12.014.

**FISHBEIN, MARK; KEPHART, SUSAN R.; WILDER, MIKE; HALPIN, KATE M.; DATWYLER, SHANNON L. (2010):**

**Phylogeny of *Camassia* (Agavaceae) inferred from Plastid *rpl16* Intron and *trnD-trnY-trnE-trnT* Intergenic Spacer DNA Sequences: Implications for Species Delimitation .**

In: Systematic Botany 35 (1), p. 77–85. DOI: 10.1600/036364410790862588.

**GOOD-AVILA, SARA V.; SOUZA, VALERIA; GAUT, BRANDON S.; EGUIARTE, LUIS E. (2006):**

**Timing and rate of Speciation in *Agave* (Agavaceae).**

In: Proceedings of the National Academy of Sciences of the United States of America 103 (24), p. 9124–9129. DOI: 10.1073/pnas.0603312103.

**HEYDUK, KAROLINA; MCKAIN, MICHAEL R.; LALANI, FALAK; LEEBENS-MACK, JAMES H. (2016):**

**Evolution of a CAM Anatomy predates the Origins of Crassulacean acid metabolism in the Agavoideae (Asparagaceae).**

In: Molecular Phylogenetics and Evolution 105, p. 102–113. DOI: 10.1016/j.ympev.2016.08.018.

**LOPES, ROSANA CONRADO; ANDREATA, REGINA HELENA POTSCH; CARTAXO-PINTO, SIMONE; TROVÓ, MARCELO; GONÇALVES-ESTEVEZ, VÂNIA (2013):**

**Pollen Morphology and wall Structure of Neotropical Species of *Herreria* and *Clara* (Asparagaceae-Agavoideae) and its taxonomic Implications.**

In: Plant Systematics and Evolution 299 (1), p. 25–34. DOI: 10.1007/s00606-012-0699-0.

**PELLMYR, OLLE; SEGRAVES, KARI A.; ALTHOFF, DAVID M.; BALCÁZAR-LARA, MANUEL; LEEBENS-MACK, JAMES H. (2007):**

**The Phylogeny of yuccas.**

In: Molecular Phylogenetics and Evolution 43 (2), p. 493–501. DOI: 10.1016/j.ympev.2006.12.015.

PIRES, J. CHRIS; MAUREIRA, IVAN J.; REBMAN, JON P.; SALAZAR, GERARDO A.; CAVRERA, LIDIA I.; FAY, MICHAEL F.; CHASE, MARK W. (2004):

**Molecular Data confirm the phylogenetic Placement of the enigmatic *Hesperocallis* (Hesperocallidaceae) with *Agave*.**

In: *Madroño* 51 (3), p. 307–311.

## **Aizoaceae**

BOHLEY, KATHARINA; JOOS, OLGA; HARTMANN, HEIDRUN E.K.; SAGE, ROWAN F.; LIEDE-SCHUMANN, SIGRID; KADEREIT, GUDRUN (2015):

**Phylogeny of Sesuvioideae (Aizoaceae) – Biogeography, Leaf Anatomy and the Evolution of C4 photosynthesis.**

In: *Perspectives in Plant Ecology, Evolution and Systematics* 17 (2), p. 116–130. DOI: 10.1016/j.ppees.2014.12.003.

HASSAN, N. S.; THIEDE, J.; LIEDE-SCHUMANN, SIGRID (2005):

**Phylogenetic Analysis of Sesuvioideae (Aizoaceae) inferred from nrDNA Internal Transcribed Spacer (ITS) Sequences and morphological Data.**

In: *Plant Systematics and Evolution* 255 (3-4), p. 121–143. DOI: 10.1007/s00606-005-0357-x.

KELLNER, A.; RITZ, CHRISTINE M.; SCHLITTENHARDT, P.; HELLWIG, FRANK H. (2011):

**Genetic differentiation in the Genus *Lithops* L. (Ruschioideae, Aizoaceae) reveals a high level of convergent Evolution and reflects geographic Distribution.**

In: *Plant Biology* 13 (2), p. 368–380. DOI: 10.1111/j.1438-8677.2010.00354.x.

KLAK, CORNELIA; BRUYN, PETER V. (2012):

**Phylogeny of the Dorotheanthae (Aizoaceae), a Tribe of succulent annuals**

61 (2), p. 293–307.

KLAK, CORNELIA; BRUYN, PETER V. (2013):

**A new infrageneric Classification for *Mesembryanthemum* (Aizoaceae: Mesembryanthemoideae).**

In: *Bothalia* 43 (2), p. 197–206. DOI: 10.4102/abc.v43i2.95.

KLAK, CORNELIA; BRUYN, PETER V.; HANÁČEK, PAVEL (2013):

**A phylogenetic Hypothesis for the recently diversified Ruschieae (Aizoaceae) in southern Africa.**

In: *Molecular Phylogenetics and Evolution* 69 (3), p. 1005–1020. DOI: 10.1016/j.ympev.2013.05.030.

KLAK, CORNELIA; BRUYN, PETER V.; HEDDERSON, TERRY A. (2007):

**A Phylogeny and new Classification for Mesembryanthemoideae (Aizoaceae).**

In: *Taxon* 56 (3), p. 737. DOI: 10.2307/25065858.

KLAK, CORNELIA; HANÁČEK, PAVEL; BRUYN, PETER V. (2014):

**Phylogeny and Taxonomy for *Mesembryanthemum* Subg. *Volkeranthus* (Aizoaceae-Mesembryanthemoideae).**

In: *South African Journal of Botany* 95, p. 112–122. DOI: 10.1016/j.sajb.2014.08.006.

KLAK, CORNELIA; HANÁČEK, PAVEL; BRUYN, PETER V. (2015):

**A Phylogeny and revised Classification for the Apatesieae (Aizoaceae: Ruschioideae) with a Comparison of centres of diversity.**

In: *Taxon* 64 (3), p. 507–522. DOI: 10.12705/643.7.

KLAK, CORNELIA; HANÁČEK, PAVEL; BRUYN, PETER V. (2017):

**Disentangling the Aizoodeae: new generic Concepts and a new Subfamily in Aizoaceae.**

In: Taxon 66 (5), p. 1147–1170. DOI: 10.12705/665.9.

**KLAK, CORNELIA; HANÁČEK, PAVEL; BRUYNS, PETER V. (2017):**

**Out of southern Africa: Origin, Biogeography and age of the Aizoodeae (Aizoaceae).**

In: Molecular Phylogenetics and Evolution 109, p. 203–216. DOI: 10.1016/j.ympev.2016.12.016.

**KLAK, CORNELIA; HEDDERSON, TERRY A.; LINDER, HANS PETER (2003):**

**A molecular Systematic Study of the *Lampranthus* Group (Aizoaceae) based on the Chloroplast TrnL-trnF and Nuclear ITS and 5s Nts Sequence Data.**

In: Systematic Botany 28 (1), p. 70–85.

**KLAK, CORNELIA; KHUNOU, ANGELINE; REEVES, GAIL; HEDDERSON, TERRY A. (2003):**

**A phylogenetic Hypothesis for the Aizoaceae (Caryophyllales) based on four Plastid DNA Regions.**

In: American Journal of Botany 90 (10), p. 1433–1445. DOI: 10.3732/ajb.90.10.1433.

**KLAK, CORNELIA; NOWELL, TRACEY L.; HEDDERSON, TERRY A. J. (2006):**

**Phylogeny and Revision of *Brownanthus* and its close allies *Aspazoma* and *Dactyloopsis* (Aizoaceae) based on Morphology and four DNA Regions.**

In: Kew Bulletin 61 (3), p. 353–400.

**OPEL, MATTHEW R. (2005):**

**A morphological Phylogeny of the Genus *Conophytum* N.E.Br. (Aizoaceae).**

In: Haseltonia 11, p. 53–77. DOI: 10.2985/1070-0048(2005)11[53:AMPOTG]2.0.CO;2.

**POWELL, ROBYN F.; BOATWRIGHT, JAMES S.; KLAK, CORNELIA; MAGEE, ANTHONY RICHARD (2016):**

**Phylogenetic Placement and generic re-Circumscriptions of the multilocular Genera *Arenifera*, *Octopoma* and *Schlechteranthus* (Aizoaceae: Ruschieae): Evidence from anatomical, morphological and Plastid DNA Data.**

In: Taxon 65 (2), p. 249–261. DOI: 10.12705/652.3.

**THULIN, MATS; THIEDE, JOACHIM; LIEDE-SCHUMANN, SIGRID (2012):**

**Phylogeny and Taxonomy of *Tribulocarpus* (Aizoaceae): A paraphyletic Species and an adaptive shift from zoochorous trample burrs to anemochorous nuts.**

In: Taxon 61 (1), p. 55–66.

**VALENTE, LUIS M.; BRITTON, ADAM W.; POWELL, MARTYN P.; PAPADOPULOS, ALEXANDER P. T.; BURGOYNE, PRISCILLA M.; SAVOLAINEN, VINCENT (2014):**

**Correlates of hyperdiversity in southern African ice plants (Aizoaceae).**

In: Botanical Journal of the Linnean Society 174 (1), p. 110–129. DOI: 10.1111/boj.12117.

## **Alangiaceae**

**DEWILDE, W.J.J.O.; DUYFJES-DE WILDE, BRIGITTA E.E. (2017):**

**Taxonomy of *Alangium* Section *Conostigma* (Alangiaceae ).**

In: Blumea 62 (1), p. 29–46. DOI: 10.3767/000651917X695164.

**FENG, CHUN-MIAO; MANCHESTER, STEVEN R.; XIANG, QIU-YUN (2009):**

**Phylogeny and Biogeography of Alangiaceae (Cornales) inferred from DNA Sequences, Morphology, and fossils.**

In: Molecular Phylogenetics and Evolution 51 (2), p. 201–214. DOI: 10.1016/j.ympev.2009.01.017.

**WILDE, WILLEM J.J.O.; DUYFJES-DE WILDE, BRIGITTA E.E. (2017):**

**The Species of *Alangium* Section *Rhytidandra* (Alangiaceae ).**

In: *Blumea* 62 (1), p. 75–83. DOI: 10.3767/000651917X695443.

## Alismataceae

ARRIGO, NILS; BUERKI, SVEN; SARR, ANOUK; GUADAGNUOLO, ROBERTO; KOZLOWSKI, GREGOR (2011):

**Phylogenetics and Phylogeography of the monocot Genus *Baldellia* (Alismataceae):  
Mediterranean refugia, suture zones and Implications for conservation.**

In: *Molecular Phylogenetics and Evolution* 58 (1), p. 33–42. DOI: 10.1016/j.ympev.2010.11.009.

CHEN, LING-YUN; CHEN, JIN-MING; GITURU, ROBERT WAHITI; TEMAM, TAMRU DEMSIS; WANG, QING-FENG (2012):

**Generic Phylogeny and historical Biogeography of Alismataceae, inferred from  
multiple DNA Sequences.**

In: *Molecular Phylogenetics and Evolution* 63 (2), p. 407–416. DOI: 10.1016/j.ympev.2012.01.016.

JACOBSON, A.; HEDRÉN, MIKAEL (2007):

**Phylogenetic Relationships in *Alisma* (Alismataceae) based on RAPDs, and Sequence  
Data from ITS and trnL.**

In: *Plant Systematics and Evolution* 265 (1-2), p. 27–44. DOI: 10.1007/s00606-006-0514-x.

LEHTONEN, SAMULI (2006):

**Phylogenetics of *Echinodorus* (Alismataceae) based on morphological Data.**

In: *Botanical Journal of the Linnean Society* 150 (3), p. 291–305. DOI: 10.1111/j.1095-8339.2006.00478.x.

LEHTONEN, SAMULI (2017):

**Splitting *Caldesia* in favour of *Albidella* (Alismataceae).**

In: *Australian Systematic Botany* 30 (1), p. 64. DOI: 10.1071/SB16050.

LEHTONEN, SAMULI; MYLLYS, LEENA (2008):

**Cladistic Analysis of *Echinodorus* (Alismataceae): simultaneous Analysis of molecular  
and morphological Data.**

In: *Cladistics* 24 (2), p. 218–239. DOI: 10.1111/j.1096-0031.2007.00177.x.

LIAO, YI-YING; GICHIRA, ANDREW WANYOIKE; WANG, QING-FENG; CHEN, JIN-MING (2016):

**Molecular Phylogeography of four endemic *Sagittaria* Species (Alismataceae) in the  
Sino-Japanese Floristic Region of East Asia.**

In: *Botanical Journal of the Linnean Society* 180 (1), p. 6–20. DOI: 10.1111/boj.12351.

## Alismatales

CHEN, LING-YUN; CHEN, JIN-MING; GITURU, ROBERT WAHITI; WANG, QING-FENG (2013):

**Eurasian Origin of Alismatidae inferred from statistical Dispersal-vicariance Analysis.**

In: *Molecular Phylogenetics and Evolution* 67 (1), p. 38–42. DOI: 10.1016/j.ympev.2013.01.001.

PETERSEN, GITTE; SEBERG, OLE; CUENCA, ARGELIA; STEVENSON, DENNIS WM.; THADEO, MARCELA; DAVIS, JERROLD I. ET AL. (2016):

**Phylogeny of the Alismatales (Monocotyledons) and the Relationship of *Acorus*  
(Acorales?).**

In: *Cladistics* 32 (2), p. 141–159. DOI: 10.1111/cla.12120.

## Alliaceae

CHASE, MARK W.; REVEAL, JAMES L.; FAY, MICHAEL F. (2009):

**A subfamilial Classification for the expanded asparagalean families Amaryllidaceae,  
Asparagaceae and Xanthorrhoeaceae.**

In: *Botanical Journal of the Linnean Society* 161 (2), p. 132–136. DOI: 10.1111/j.1095-8339.2009.00999.x.

CHOI, HYEOK JAE; GIUSSANI, LILIANA M.; JANG, CHANG-GEE; OH, BYOUNG UN; COTA-SÁNCHEZ, J. HUGO (2012):



**Systematics of disjunct northeastern Asian and northern North American *Allium* (Amaryllidaceae).**

In: Botany 90 (6), p. 491–508. DOI: 10.1139/B2012-031.

**DENİZ, İSMAIL GÖKHAN; GENÇ, İLKER; SARI, DUYGU (2015):**

**Morphological and molecular Data reveal a new Species of *Allium* (Amaryllidaceae) from Sw Anatolia, Turkey.**

In: Phytotaxa 212 (4), p. 283. DOI: 10.11646/phytotaxa.212.4.4.

**ESCOBAR, INELIA; NOVOA, PATRICIO; RUIZ, EDUARDO; NEGRITTO, MARÍA A.; BAEZA, CARLOS M. (2010):**

**Nuevo hallazgo de *Miersia cornuta* Phil. (Gilliesieae-Alliaceae).**

In: Gayana Botánica 67 (1), p. 130–134. DOI: 10.4067/S0717-66432010000100012.

**FAY, MICHAEL F.; RUDALL, PAULA J.; CHASE, MARK W. (2006):**

**Molecular Studies of Subfamily Gilliesioideae (Alliaceae).**

In: Aliso 22, p. 367–371.

**FRIESEN, NIKOLAI; FRITSCH, REINHARD M.; BLATTNER, FRANK R. (2006):**

**Phylogeny and new Intrageneric Classification of *Allium* (Alliaceae) based on Nuclear Ribosomal DNA ITS Sequences.**

In: Aliso 22, p. 372–395.

**FRIESEN, NIKOLAI; HERDEN, TOBIAS; SCHOENFELDER, PETER (2015):**

***Allium canariense* (Amaryllidaceae), a Species endemic to the Canary Islands.**

In: Phytotaxa 221 (1), p. 1. DOI: 10.11646/phytotaxa.221.1.1.

**GURUSHIDZE, MAIA; FRITSCH, REINHARD M.; BLATTNER, FRANK R. (2008):**

**Phylogenetic Analysis of *Allium* Subg. *Melanocrommyum* infers cryptic Species and demands a new Sectional Classification.**

In: Molecular Phylogenetics and Evolution 49 (3), p. 997–1007. DOI: 10.1016/j.ympev.2008.09.003.

**GURUSHIDZE, MAIA; FRITSCH, REINHARD M.; BLATTNER, FRANK R. (2010):**

**Species-level Phylogeny of *Allium* Subgenus *Melanocrommyum*: Incomplete Lineage sorting, Hybridization and trnF Gene duplication.**

In: Taxon 59 (3), p. 829–840. DOI: 10.1002/tax.593012.

**GURUSHIDZE, MAIA; MASHAYEKHI, SAEIDEH; BLATTNER, FRANK R.; FRIESEN, NIKOLAI; FRITSCH, REINHARD M. (2007):**

**Phylogenetic Relationships of wild and cultivated Species of *Allium* Section *Cepa* inferred by nuclear rDNA ITS Sequence Analysis.**

In: Plant Systematics and Evolution 269 (3-4), p. 259–269. DOI: 10.1007/s00606-007-0596-0.

**HERDEN, TOBIAS; HANELT, PETER; FRIESEN, NIKOLAI (2016):**

**Phylogeny of *Allium* L. Subgenus *Anguinum* (G. Don. ex W.d.j. Koch) N. Friesen (Amaryllidaceae).**

In: Molecular Phylogenetics and Evolution 95, p. 79–93. DOI: 10.1016/j.ympev.2015.11.004.

**HUANG, DE-QING; YANG, JING-TIAN; ZHOU, CHUN-JING; ZHOU, SONG-DONG; HE, XING-JIN (2014):**

**Phylogenetic reappraisal of *Allium* Subgenus *Cyathophora* (Amaryllidaceae) and related taxa, with a proposal of two new Sections.**

In: Journal of Plant Research 127 (2), p. 275–286. DOI: 10.1007/s10265-013-0617-8.

**JARA-ARANCIO, PAOLA; ARROYO, MARY T.K.; GUERRERO, PABLO C.; HINOJOSA, LUIS F.; ARANCIO, GINA; MÉNDEZ, MARCO A. (2014):**

**Phylogenetic Perspectives on biome shifts in *Leucocoryne* (Alliaceae) in relation to climatic niche Evolution in western South America.**

- In: Journal of Biogeography 41 (2), p. 328–338. DOI: 10.1111/jbi.12186.
- LI, MIN-JIE; TAN, JIN-BO; XIE, DENG-FENG; HUANG, DE-QING; GAO, YUN-DONG; HE, XING-JIN (2016):  
**Revisiting the evolutionary events in *Allium* Subgenus *Cyathophora* (Amaryllidaceae): Insights into the effect of the Hengduan Mountains Region (HMR) uplift and Quaternary climatic fluctuations to the environmental Changes in the Qinghai-Tibet Plateau.**  
In: Molecular Phylogenetics and Evolution 94 (Pt B), p. 802–813. DOI: 10.1016/j.ympev.2015.10.002.
- LI, QIN-QIN; ZHOU, SONG-DONG; HE, XING-JIN; YU, YANG; ZHANG, YU-CHENG; WEI, XIAN-QIN (2010):  
**Phylogeny and Biogeography of *Allium* (Amaryllidaceae: Allieae) based on nuclear ribosomal Internal Transcribed Spacer and Chloroplast *rps16* Sequences, focusing on the inclusion of Species endemic to China.**  
In: Annals of Botany 106 (5), p. 709–733. DOI: 10.1093/aob/mcq177.
- MEMARIANI, FARSHID; JOHARCHI, MOHAMMAD REZA; ARJMANDI, ALI ASGHAR (2012):  
***Allium aladaghense* (Amaryllidaceae, Allieae), a new Species of Section *Asteroprason* from northeast of Iran.**  
In: Phytotaxa 56, p. 28–34.
- NGUYEN, NHU H.; DRISCOLL, HEATHER E.; SPECHT, CHELSEA D. (2008):  
**A molecular Phylogeny of the wild onions (*Allium*; Alliaceae) with a focus on the western North American center of diversity.**  
In: Molecular Phylogenetics and Evolution 47 (3), p. 1157–1172. DOI: 10.1016/j.ympev.2007.12.006.
- SASSONE, AGOSTINA BELEN; BELGRANO, MANUEL J.; GUAGLIANONE, ENCARNACIÓN ROSA (2015):  
**The Reinstatement of *Latace* Phil. (Amaryllidaceae, Allioideae).**  
In: Phytotaxa 239 (3), p. 253. DOI: 10.11646/phytotaxa.239.3.6.
- SASSONE, AGOSTINA BELEN; GIUSSANI, LILIANA M.; GUAGLIANONE, ENCARNACIÓN ROSA (2014):  
***Beauverdia*, a resurrected Genus of Amaryllidaceae (Allioideae, Gilliesieae).**  
In: Systematic Botany 39 (3), p. 767–775. DOI: 10.1600/036364414X681527.
- SASSONE, AGOSTINA BELEN; GIUSSANI, LILIANA M.; GUAGLIANONE, ENCARNACIÓN ROSA (2013):  
**Multivariate studies of *Ipheion* (Amaryllidaceae, Allioideae) and related Genera.**  
In: Plant Systematics and Evolution 299 (8), p. 1561–1575. DOI: 10.1007/s00606-013-0819-5.
- SEREGIN, ALEXEY P.; ANAČKOV, GORAN; FRIESEN, NIKOLAI (2015):  
**Molecular and morphological Revision of the *Allium saxatile* Group (Amaryllidaceae): geographical isolation as the driving force of underestimated speciation.**  
In: Botanical Journal of the Linnean Society 178 (1), p. 67–101. DOI: 10.1111/boj.12269.
- SINITSYNA, TATIANA A.; HERDEN, TOBIAS; FRIESEN, NIKOLAI (2016):  
**Dated Phylogeny and Biogeography of the Eurasian *Allium* Section *Rhizirideum* (Amaryllidaceae).**  
In: Plant Systematics and Evolution 302 (9), p. 1311–1328. DOI: 10.1007/s00606-016-1333-3.
- SOUZA, GUSTAVO; CROSA, ORFEO; GUERRA, MARCELO (2015):  
**Karyological, morphological, and phylogenetic Diversification in *Leucocoryne* Lindl. (Allioideae, Amaryllidaceae).**  
In: Plant Systematics and Evolution 301 (8), p. 2013–2023. DOI: 10.1007/s00606-015-1216-z.
- STAFFORD, GARY I.; WIKKELSØ, METTE J.; NANCKE, LOUISE; JÄGER, ANNA K.; MÖLLER, MICHAEL; RØNSTED, NINA (2016):

**The first phylogenetic Hypothesis for the southern African endemic Genus *Tulbaghia* (Amaryllidaceae, Alliioideae) based on Plastid and nuclear DNA Sequences.**

In: Botanical Journal of the Linnean Society 181 (2), p. 156–170. DOI: 10.1111/boj.12417.

**WHEELER, ERICA J.; MASHAYEKHI, SAEIDEH; MCNEAL, DALE W.; COLUMBUS, TRAVIS J.; PIRES, J. CHRIS (2013):  
Molecular Systematics of *Allium* Subgenus *Amerallium* (Amaryllidaceae) in North America.**

In: American Journal of Botany 100 (4), p. 701–711. DOI: 10.3732/ajb.1200641.

## **Alstroemeriaceae**

**ALZATE, FERNANDO; MORT, MARK E.; RAMIREZ, MONICA (2008):**

**Phylogenetic Analyses of *Bomarea* (Alstroemeriaceae) based on combined Analyses of nrDNA ITS, psbA-trnH, rpoB-trnC and matK Sequences.**

In: Taxon 57 (3), p. 853–862. DOI: 10.1002/tax.573014.

**ALZATE, FERNANDO; QUIJANO-ABRIL, MARIO ALBERTO; MORRONE, JUAN J. (2008):**

**Panbiogeographical Analysis of the Genus *Bomarea* (Alstroemeriaceae).**

In: Journal of Biogeography 35 (7), p. 1250–1257. DOI: 10.1111/j.1365-2699.2008.01896.x.

**CHACÓN, JULIANA; SOUSA, ARETUZA; BAEZA, CARLOS M.; RENNER, SUSANNE P. (2012):**

**Ribosomal DNA Distribution and a Genus-wide Phylogeny reveal Patterns of chromosomal Evolution in *Alstroemeria* (Alstroemeriaceae).**

In: American Journal of Botany 99 (9), p. 1501–1512. DOI: 10.3732/ajb.1200104.

**SANSO, A. MARIEL; AAGESEN, LONE; XIFREDA, CECILIA C. (2014):**

**Foliar Anatomy and microMorphology of southern South American Alstroemeriaceae: Alstroemeria, and its systematic Implications in *Alstroemeria*.**

In: Nordic Journal of Botany 32 (6), p. 731–743. DOI: 10.1111/njb.00470.

## **Altingiaceae**

**ICKERT-BOND, STEFANIE M.; WEN, JUN (2006):**

**Phylogeny and Biogeography of Altingiaceae: Evidence from combined Analysis of five non-coding Chloroplast Regions.**

In: Molecular Phylogenetics and Evolution 39 (2), p. 512–528. DOI: 10.1016/j.ympev.2005.12.003.

**SHI, S.; HUANG, Y.; ZHONG, YANG; DU, Y.; ZHANG, QIANG; CHANG, H.; BOUFFORD, D.E. (2001):**

**Phylogeny of the Altingiaceae based on cpDNA matK, Py-igs and nrDNA ITS Sequences.**

In: Plant Systematics and Evolution 230, p. 13–24.

## **Amaranthaceae**

**AKHANI, HOSSEIN; EDWARDS, GERALD E.; ROALSON, ERIC H. (2007):**

**Diversification of the Old World Salsola s.l. (Chenopodiaceae): molecular phylogenetic Analysis of Nuclear and Chloroplast Data Sets and a revised Classification.**

In: International Journal of Plant Sciences 168 (6), p. 931–956.

**APPLEQUIST, WENDY L.; PRATT, DONALD B. (2005):**

**The Malagasy Endemic *Dendroportulaca* (Portulacaceae) is referable to *Deeringia* (Amaranthaceae): molecular and morphological Evidence.**

In: Taxon 54 (3), p. 681–687. DOI: 10.2307/25065424.

**BRANDT, RONNY; LOMONOSOVA, MARIA; WEISING, KURT; WAGNER, NATASCHA; FREITAG, HELMUT (2015):**

**Phylogeny and Biogeography of *Suaeda* Subg. *Brezia*  
(Chenopodiaceae/Amaranthaceae) in the Americas.**

In: Plant Systematics and Evolution 301 (10), p. 2351–2375. DOI: 10.1007/s00606-015-1233-y.

**BRULLO, CRISTIAN; BRULLO, SALVATORE; GASKIN, JOHN F.; GALDO, GIANPIETRO GIUSSO DEL; HRUSA, G. FREDERIC;  
SALMERI, CRISTINA (2015):**

**A new Species of *Kali* (Salsoloideae, Chenopodiaceae) from Sicily, supported by  
molecular Analysis.**

In: Phytotaxa 201 (4), p. 256. DOI: 10.11646/phytotaxa.201.4.2.

**CABRERA, JONATHAN F.; JACOBS, SURREY W.L.; KADEREIT, GUDRUN (2009):**

**Phylogeny of the Australian Camphorosmeae (Chenopodiaceae) and the taxonomic  
Significance of the Fruiting Perianth.**

In: International Journal of Plant Sciences 170 (4), p. 505–521. DOI: 10.1086/597267.

**DEL-PINO, IVONNE SÁNCHEZ; BORSCH, THOMAS; MOTLEY, TIMOTHY J. (2009):**

**trnL-F and rpl16 Sequence Data and dense Taxon Sampling reveal Monophyly of  
Unilocular Anthered Gomphrenoideae (Amaranthaceae) and an improved Picture of  
their internal Relationships.**

In: Systematic Botany 34 (1), p. 57–67. DOI: 10.1600/036364409787602401.

**FUENTES-BAZÁN, SUSY; MANSION, GUILHEM; BORSCH, THOMAS (2012):**

**Towards a Species level Tree of the globally diverse Genus *Chenopodium*  
(Chenopodiaceae).**

In: Molecular Phylogenetics and Evolution 62 (1), p. 359–374. DOI: 10.1016/j.ympev.2011.10.006.

**FUENTES-BAZÁN, SUSY; UOTILA, PERTTI; BORSCH, THOMAS (2012):**

**A novel Phylogeny-based generic Classification for *Chenopodium* sensu lato, and a  
tribal rearrangement of Chenopodioideae (Chenopodiaceae).**

In: Willdenowia 42 (1), p. 5–24. DOI: 10.3372/wi.42.42101.

**HAMMER, TIMOTHY; DAVIS, ROBERT; THIELE, KEVIN R. (2015):**

**A molecular Framework Phylogeny for *Ptilotus* (Amaranthaceae): Evidence for the  
rapid Diversification of an arid Australian Genus.**

In: Taxon 64 (2), p. 272–285. DOI: 10.12705/642.6.

**HEKLAU, HEIKE; RÖSER, MARTIN (2008):**

**Delineation, Taxonomy and phylogenetic Relationships of the Genus  
*Krascheninnikovia* (Amaranthaceae Subtribe Axyridinae).**

In: Taxon 57 (2), p. 563–576.

**HOHMANN, SANDRA; KADEREIT, JOACHIM W.; KADEREIT, GUDRUN (2006):**

**Understanding Mediterranean-Californian disjunctions: molecular Evidence from  
Chenopodiaceae-Betoideae.**

In: Taxon 55 (1), p. 67–78.

**KADEREIT, GUDRUN; BALL, PETER; BEER, SVETLANA; MUCINA, LADISLAV; SOKOLOFF, DMITRY D.; TEEGE, PATRICK ET AL.  
(2007):**

**A taxonomic Nightmare Comes True: Phylogeny and Biogeography of Glassworts  
(*Salicornia* L., Chenopodiaceae).**

In: Taxon 56 (4), p. 1143–1170. DOI: 10.2307/25065909.

**KADEREIT, GUDRUN; BORSCH, THOMAS; WEISING, KURT; FREITAG, HELMUT (2003):**

**Phylogeny of Amaranthaceae and Chenopodiaceae and the Evolution of C4 Photosynthesis.**

In: International Journal of Plant Sciences 164 (6).

**KADEREIT, GUDRUN; FREITAG, HELMUT (2011):**

**Molecular Phylogeny of Camphorosmeae (Camphorosmoideae, Chenopodiaceae): Implications for Biogeography, Evolution of C4-photosynthesis and Taxonomy.**

In: Taxon 60 (1), p. 51–78.

**KADEREIT, GUDRUN; MAVRODIEV, EVGENY V.; ZACHARIAS, ELIZABETH H.; SUKHORUKOV, ALEXANDER P. (2010):**

**Molecular Phylogeny of Atripliceae (Chenopodioideae, Chenopodiaceae): Implications for Systematics, Biogeography, flower and Fruit Evolution, and the Origin of C4 photosynthesis.**

In: American Journal of Botany 97 (10), p. 1664–1687. DOI: 10.3732/ajb.1000169.

**KADEREIT, GUDRUN; MUCINA, LADISLAV; FREITAG, HELMUT (2006):**

**Phylogeny of Salicornioideae (Chenopodiaceae): Diversification, Biogeography, and evolutionary Trends in Leaf and Flower Morphology.**

In: Taxon 55 (3), p. 617–642. DOI: 10.2307/25065639.

**KADEREIT, GUDRUN; PIIRAINEN, MIKKO; LAMBINON, JACQUES; VANDERPOORTEN, ALAIN (2012):**

**Cryptic Taxa should have names: Reflections in the glasswort Genus *Salicornia* (Amaranthaceae).**

In: Taxon 61 (6), p. 1227–1239.

**KAPRALOV, MAXIM V.; AKHANI, HOSSEIN; VOZNESENSKAYA, ELENA V.; EDWARDS, GERALD E.; FRANCESCHI, VINCENT; ROALSON, ERIC H. (2006):**

**Phylogenetic Relationships in the Salicornioideae / Suaedoideae / Salsoloideae s.l. (Chenopodiaceae) Clade and a Clarification of the phylogenetic Position of *Bienertia* and *Alexandra* using multiple DNA Sequence Datasets.**

In: Systematic Botany 31 (3), p. 571–585.

**KOLANO, BOZENA; MCCANN, JAMIE; ORZECZOWSKA, MAJA; SIWINSKA, DOROTA; TEMSCH, EVA M.; WEISS-SCHNEEWEISS, HANNA (2016):**

**Molecular and cytogenetic Evidence for an allotetraploid Origin of *Chenopodium quinoa* and *C. berlandieri* (Amaranthaceae).**

In: Molecular Phylogenetics and Evolution 100, p. 109–123. DOI: 10.1016/j.ympev.2016.04.009.

**KOLANO, BOZENA; SIWINSKA, DOROTA; MCCANN, JAMIE; WEISS-SCHNEEWEISS, HANNA (2015):**

**The Evolution of Genome size and rDNA in diploid Species of *Chenopodium* s.l. (Amaranthaceae).**

In: Botanical Journal of the Linnean Society 179 (2), p. 218–235. DOI: 10.1111/boj.12321.

**LAMONICO, DUILIO; JARVIS, CHARLES E. (2012):**

**Lectotypification of two Linnaean names in *Chenopodium* L. (Chenopodiaceae).**

In: Taxon 61 (4), p. 864–865.

**LEE, KOK K.; HARRISON, DION K.; JOHNSTON, MARGARET E.; WILLIAMS, RICHARD R. (2007):**

**Molecular taxonomic clarification of *Ptilotus exaltatus* and *Ptilotus nobilis* (Amaranthaceae).**

In: Australian Systematic Botany 20 (1), p. 72–81. DOI: 10.1071/SB06010.

**MASSON, RÜDIGER; KADEREIT, GUDRUN (2013):**

**Phylogeny of Polycnemoideae (Amaranthaceae): Implications for Biogeography, Character Evolution and Taxonomy.**

In: Taxon 62 (1), p. 100–111.

**MCCAULEY, ROSS A.; BALLARD, HARVEY EUGENE (2007):**

**Systematics of North American *Froelichia* (Amaranthaceae Subfam. Gomphrenoideae) Ii: Phylogeny and biogeographic Speciation Patterns inferred from nrITS Sequence Data.**

In: Brittonia 59 (3), p. 275–289. DOI: 10.1663/0007-196X(2007)59[275:SONAFA]2.0.CO;2.

**MOLERO, J.; MONTSERRAT, J.M. (2006):**

**Quenopodiáceas nuevas o raras para la Flora de Marruecos.**

In: Lagasalia 26, p. 7–24.

**MOSYAKIN, SERGEI L. (2013):**

**New nomenclatural Combinations in *Blitum*, *Oxybasis*, *Chenopodiastrum*, and *Lipandra* (Chenopodiaceae).**

In: Phytoneuron 56, p. 1–8.

**MURAKEÖZY, E. P.; AÏNOUCHE, ABDELKADER; MEUDEC, A.; DESLANDES, E.; POUPART, N. (2007):**

**Phylogenetic Relationships and genetic Diversity of the Salicornieae (Chenopodiaceae) native to the Atlantic coasts of France.**

In: Plant Systematics and Evolution 264 (3-4), p. 217–237. DOI: 10.1007/s00606-006-0511-0.

**PIIRAINEN, MIKKO; LIEBISCH, OSKAR; KADEREIT, GUDRUN (2017):**

**Phylogeny, Biogeography, Systematics and Taxonomy of Salicornioideae (Amaranthaceae/Chenopodiaceae) – A cosmopolitan, highly specialized hygrohalophyte Lineage dating back to the Oligocene.**

In: Taxon 66 (1), p. 109–132. DOI: 10.12705/661.6.

**PINO, IVONNE SÁNCHEZ-DEL; MOTLEY, TIMOTHY J. (2010):**

**Evolution of *Tidestromia* (Amaranthaceae) in the deserts of the southwestern United States and Mexico.**

In: Taxon 59 (1), p. 38–48.

**PINO, IVONNE SÁNCHEZ-DEL; MOTLEY, TIMOTHY J.; BORSCH, THOMAS (2012):**

**Molecular Phylogenetics of *Alternanthera* (Gomphrenoideae, Amaranthaceae): resolving a complex taxonomic History caused by different interpretations of morphological Characters in a Lineage with C4 and C3–c4 intermediate Species.**

In: Botanical Journal of the Linnean Society 169, p. 493–517.

**RAAB-STRAUBE, ECKHARD (2013):**

**Euro+Med-Checklist Notulae, 2.**

In: Willdenowia 43 (2), p. 239–249. DOI: 10.3372/wi.43.43202.

**ROMEIRAS, MARIA M.; VIEIRA, ANA; SILVA, DIOGO N.; MOURA, MÓNICA; SANTOS-GUERRA, ARNOLDO; BATISTA, DORA ET AL. (2016):**

**Evolutionary and Biogeographic Insights on the Macaronesian *Beta patellifolia* Species (Amaranthaceae) from a Time-Scaled molecular Phylogeny.**

In: Public Library of Science One 11 (3), e0152456. DOI: 10.1371/journal.pone.0152456.

**SCHÜTZE, P.; FREITAG, HELMUT; WEISING, KURT (2003):**

**An integrated molecular and morphological Study of the Subfamily Suaedoideae Ulbr. (Chenopodiaceae).**

In: *Plant Systematics and Evolution* 239 (3-4), p. 257–286. DOI: 10.1007/s00606-003-0013-2.

**SHEPHERD, KELLY A.; WAYCOTT, MICHELLE; CALLADINE, AINSLEY (2004):**

**Radiation of the Australian Salicornioideae (Chenopodiaceae) - based on Evidence from Nuclear and Chloroplast DNA Sequences.**

In: *American Journal of Botany* 91 (9), p. 1387–1397.

**SHEPHERD, KELLY A.; WILSON, PAUL G. (2007):**

**Incorporation of the Australian Genera *Halosarcia*, *Pachycornia*, *Sclerostegia* and *Tegicornia* into *Tecticornia* (Salicornioideae, Chenopodiaceae).**

In: *Australian Systematic Botany* 20 (4), p. 319–331. DOI: 10.1071/SB07002.

**STEFFEN, SIMONE; BALL, PETER; MUCINA, LADISLAV; KADEREIT, GUDRUN (2015):**

**Phylogeny, Biogeography and ecological Diversification of *Sarcocornia* (Salicornioideae, Amaranthaceae).**

In: *Annals of Botany* 115 (3), p. 353–368. DOI: 10.1093/aob/mcu260.

**STETTER, MARKUS G.; SCHMID, KARL J. (2017):**

**Analysis of phylogenetic Relationships and Genome size Evolution of the *Amaranthus* Genus using GBS indicates the ancestors of an ancient crop.**

In: *Molecular Phylogenetics and Evolution* 109, p. 80–92. DOI: 10.1016/j.ympev.2016.12.029.

**SUKHORUKOV, ALEXANDER P.; KUSHUNINA, MARIA (2015):**

**Corrigenda to “taxonomic Revision of Chenopodiaceae in Nepal” [Phytotaxa 191: 10–44. 2014].**

In: *Phytotaxa* 226 (3), p. 288. DOI: 10.11646/phytotaxa.226.3.10.

**THIV, MIKE; THULIN, MATS; KILIAN, NORBERT; LINDER, HANS PETER (2006):**

**Eritreo-Arabian Affinities of the Socotran Flora as Revealed from the molecular Phylogeny of *Aerva* (Amaranthaceae).**

In: *Systematic Botany* 31 (3), p. 560–570.

**THULIN, MATS; RYDBERG, ANDERS; THIEDE, JOACHIM (2010):**

**Identity of *Tetragonia pentandra* and Taxonomy and Distribution of *Patellifolia* (Chenopodiaceae).**

In: *Willdenowia* 40 (1), p. 5–11. DOI: 10.3372/wi.40.40101.

**WEN, ZHI-BIN; ZHANG, MING-LI; ZHU, GE-LIN; SANDERSON, STEWART C. (2010):**

**Phylogeny of Salsoleae s.l. (Chenopodiaceae) based on DNA Sequence Data from ITS, psbB–psbH, and rbcL, with Emphasis on Taxa of northwestern China.**

In: *Plant Systematics and Evolution* 288 (1-2), p. 25–42. DOI: 10.1007/s00606-010-0310-5.

**XU, F.; SUN, M. (2001):**

**Comparative Analysis of phylogenetic Relationships of grain amaranths and their wild relatives (*Amaranthus*; Amaranthaceae) using internal transcribed spacer, amplified fragment length polymorphism, and double-primer fluorescent intersimple Sequence repeat Markers.**

In: *Molecular Phylogenetics and Evolution* 21 (3), p. 372–387. DOI: 10.1006/mpev.2001.1016.

**ZACHARIAS, ELIZABETH H.; BALDWIN, BRUCE G. (2010):**

**A molecular Phylogeny of North American Atripliceae (Chenopodiaceae), with Implications for Floral and Photosynthetic Pathway Evolution.**

In: *Systematic Botany* 35 (4), p. 839–857. DOI: 10.1600/036364410X539907.

## Amaryllidaceae

- BAY-SMIDT, M.G.K.; JÄGER, ANNA K.; KRYDSFELDT, K.; MEEROW, ALAN W.; STAFFORD, GARY I.; VAN STADEN, J.; RØNSTED, NINA (2011):**  
**Phylogenetic selection of target Species in Amaryllidaceae Tribe Haemantheae for acetylcholinesterase inhibition and affinity to the serotonin reuptake transport protein.**  
 In: South African Journal of Botany 77 (1), p. 175–183. DOI: 10.1016/j.sajb.2010.07.016.
- BJORÅ, CHARLOTTE SLETTEN; KWEMBEYA, EZEKIEL G.; BOGNER, JOSEF; NORDAL, INGER (2009):**  
**Geophytes diverging in rivers—a Study on the Genus *Crinum*, with two new rheophytic Taxa from Cameroon.**  
 In: Taxon 58 (2), p. 561–571. DOI: 10.1002/tax.582020.
- BUSH, CATHERINE M.; ROLLINS, DOLLIE; SMITH, GERALD L. (2010):**  
**The Phylogeny of the Southeastern United States *Hymenocallis* (Amaryllidaceae) based on ISSR Fingerprinting and morphological Data.**  
 In: Castanea 75 (3), p. 368–380. DOI: 10.2179/09-012.1.
- CASTRO, OLGA; BRULLO, SALVATORE; COLOMBO, PAOLO; JURY, STEPHEN L.; LUCA, PAOLO; DI MAIO, ANTONIETTA (2012):**  
**Phylogenetic and biogeographical Inferences for *Pancratium* (Amaryllidaceae), with an Emphasis on the Mediterranean Species based on Plastid Sequence Data.**  
 In: Botanical Journal of the Linnean Society 170 (1), p. 12–28. DOI: 10.1111/j.1095-8339.2012.01268.x.
- GAGE, EWAN; WILKIN, PAUL; CHASE, MARK W.; HAWKINS, JULIE A. (2011):**  
**Phylogenetic Systematics of *Sternbergia* (Amaryllidaceae) based on Plastid and ITS Sequence Data.**  
 In: Botanical Journal of the Linnean Society 166 (2), p. 149–162. DOI: 10.1111/j.1095-8339.2011.01138.x.
- GARCÍA, NICOLÁS; MEEROW, ALAN W.; SOLTIS, DOUGLAS E.; SOLTIS, PAMELA P. (2014):**  
**Testing deep reticulate Evolution in Amaryllidaceae Tribe Hippeastreae (Asparagales) with ITS and Chloroplast Sequence Data.**  
 In: Systematic Botany 39 (1), p. 75–89. DOI: 10.1600/036364414X678099.
- GRAHAM, SEAN W.; BARRETT, SPENCER C. H. (2004):**  
**Phylogenetic Reconstruction of the Evolution of stylar polymorphisms in *Narcissus* (Amaryllidaceae).**  
 In: American Journal of Botany 91 (7), p. 1007–1021. DOI: 10.3732/ajb.91.7.1007.
- KWEMBEYA, EZEKIEL G.; BJORÅ, CHARLOTTE SLETTEN; STEDJE, BRITA; NORDAL, INGER (2007):**  
**Phylogenetic Relationships in the Genus *Crinum* (Amaryllidaceae) with Emphasis on tropical African species: Evidence from trnL-F and nuclear ITS DNA Sequence Data.**  
 In: Taxon 56 (3), p. 801–810. DOI: 10.2307/25065862.
- LLED, MA D.; DAVIS, AARON P.; CRESPO, MANUEL B.; CHASE, MARK W.; FAY, MICHAEL F. (2004):**  
**Phylogenetic Analysis of *Leucojum* and *Galanthus* (Amaryllidaceae) based on Plastid matK and nuclear ribosomal spacer (ITS) DNA Sequences and Morphology.**  
 In: Plant Systematics and Evolution 246 (3-4), p. 223–243. DOI: 10.1007/s00606-004-0152-0.
- MEEROW, ALAN W.; CLAYTON, JASON R. (2004):**  
**Generic Relationships among the baccate-fruited Amaryllidaceae (tribe Haemantheae) inferred from Plastid and nuclear non-coding DNA Sequences.**  
 In: Plant Systematics and Evolution 244 (3-4), p. 141–155. DOI: 10.1007/s00606-003-0085-z.
- MEEROW, ALAN W.; FRANCISCO-ORTEGA, JAVIER; KUHN, DAVID N.; SCHNELL, RAYMOND J. (2006):**



**Phylogenetic Relationships and Biogeography within the Eurasian Clade of Amaryllidaceae based on Plastid ndhF and nrDNA ITS Sequences: Lineage Sorting in a Reticulate Area?**

In: Systematic Botany 31 (1), p. 42–60.

**MEEROW, ALAN W.; GUY, CHARLES L.; LI, QIN-BAO; YANG, SI-LIN (2000):**

**Phylogeny of the American Amaryllidaceae based on nrDNA ITS Sequences.**

In: Systematic Botany 25 (4), p. 708–726. DOI: 10.2307/2666729.

**MEEROW, ALAN W.; JOST, LOU; OLEAS, NORA (2015):**

**Two new Species of endemic Ecuadorean Amaryllidaceae (Asparagales, Amaryllidaceae, Amarylloideae, Eucharideae).**

In: PhytoKeys (48), p. 1–9. DOI: 10.3897/phytokeys.48.4399.

**MEEROW, ALAN W.; LEHMILLER, DAVID J.; CLAYTON, JASON R. (2003):**

**Phylogeny and Biogeography of *Crinum* L. (Amaryllidaceae) inferred from nuclear and limited Plastid non-coding DNA Sequences.**

In: Botanical Journal of the Linnean Society 141 (3), p. 349–363. DOI: 10.1046/j.1095-8339.2003.00142.x.

**MEEROW, ALAN W.; SNUMAN, DEIRDRE (2006):**

**The Never-ending Story: Multigene Approaches to the Phylogeny of Amaryllidaceae.**

In: Aliso 22 (1), p. 355–366. DOI: 10.5642/aliso.20062201.29.

**MUÑOZ, MANUEL; RIEGEL, RICARDO; SEEMANN, PETER; PEÑAILILLO, PATRICIO; SCHIAPPACASSE, FLAVIA; NÚÑEZ, JOSÉ (2011):**

**Relaciones filogenéticas de *Rhodolirium montanum* Phil. y especies afines, basadas en secuencias nucleotídicas de la región ITS y análisis cariotípico.**

In: Gayana Botánica 68 (1), p. 40–48. DOI: 10.4067/S0717-66432011000100005.

**RAN, Y. (2001):**

**Phylogenetic Analysis and Karyotype Evolution in the Genus *Clivia* (Amaryllidaceae).**

In: Annals of Botany 87 (6), p. 823–830. DOI: 10.1006/anbo.2001.1422.

**RØNSTED, NINA; ZUBOV, DIMITRI; BRUUN-LUND, SAM; DAVIS, AARON P. (2013):**

**Snowdrops falling slowly into place: an improved Phylogeny for *Galanthus* (Amaryllidaceae).**

In: Molecular Phylogenetics and Evolution 69 (1), p. 205–217. DOI: 10.1016/j.ympev.2013.05.019.

**SANTOS-GALLY, ROCÍO; VARGAS, PABLO; ARROYO, JUAN (2012):**

**Insights into Neogene Mediterranean Biogeography based on phylogenetic Relationships of mountain and lowland Lineages of *Narcissus* (Amaryllidaceae).**

In: Journal of Biogeography 39 (4), p. 782–798. DOI: 10.1111/j.1365-2699.2011.02526.x.

**SHI, SHUDE; SUN, YAQING; WEI, LEI; LEI, XUEFENG; CAMERON, KENNETH M.; FU, CHENG-XIN (2014):**

**Plastid DNA Sequence Data help to clarify phylogenetic Relationships and reticulate Evolution in *Lycoris* (Amaryllidaceae).**

In: Botanical Journal of the Linnean Society 31, p. 115–126. DOI: 10.1111/boj.12198.

**TAŞCI MARGOZ, NIVART; YÜZBAŞIOĞLU, SIRRI İBRAHİM; ÇELEN, ZEYNEP; EKİM, TUNA; BILGIN, AYŞE NEŞE (2013):**

**Molecular Phylogeny of *Galanthus* (Amaryllidaceae) of Anatolia inferred from multiple nuclear and Chloroplast DNA Regions.**

In: Turkish Journal of Botany 37, p. 993–1007. DOI: 10.3906/bot-1209-41.

**WEICHHARDT-KULESSA, KATJA; BÖRNER, THOMAS; SCHMITZ, JÜRGEN; MÜLLER-DOBLIES, UTE; MÜLLER-DOBLIES, DIETRICH (2000):**

**Controversial Taxonomy of Strumariinae (Amaryllidaceae) investigated by nuclear rDNA (ITS) Sequences.**

In: *Plant Systematics and Evolution* 223 (1-2), p. 1–13. DOI: 10.1007/BF00985323.

ZONNEVELD, BEN J. M. (2008):

**The systematic value of nuclear DNA content for all Species of *Narcissus* L. (Amaryllidaceae).**

In: *Plant Systematics and Evolution* 275 (1-2), p. 109–132. DOI: 10.1007/s00606-008-0015-1.

## **Anacampserotaceae**

DREHER, HAGEN; RODGERSON, CHRIS; YOUNG, ANDREW (2014):

**A new Combination and the Description of a new Species in the Section Avonia of the Genus *Anacampseros* (Anacampserotaceae).**

In: *Bradleya* 32 (32), p. 105–111. DOI: 10.25223/brad.n32.2014.a4.

GURALNICK, LONNIE J.; CLINE, AMANDA; SMITH, MONICA; SAGE, ROWAN F. (2008):

**Evolutionary physiology: the extent of C4 and Cam photosynthesis in the Genera *Anacampseros* and *Grahamia* of the Portulacaceae.**

In: *Journal of Experimental Botany* 59 (7), p. 1735–1742. DOI: 10.1093/jxb/ern081.

NYFFELER, RETO (2007):

**The closest relatives of cacti: Insights from phylogenetic Analyses of Chloroplast and mitochondrial Sequences with special Emphasis on Relationships in the Tribe Anacampseroteae.**

In: *American Journal of Botany* 94 (1), p. 89–101. DOI: 10.3732/ajb.94.1.89.

## **Anacardiaceae**

ANDRÉS-HERNÁNDEZ, AGUSTINA ROSA; TERRAZAS, TERESA; SALAZAR, GERARDO A.; OCHOTERENA, HELGA (2014):

**Phylogenetic Analysis based on structural and combined Analyses of *Rhus* s.s. (Anacardiaceae).**

In: *Botanical Journal of the Linnean Society* 176, p. 452–468.

KAFKAS, SALIH (2006):

**Phylogenetic Analysis of the Genus *Pistacia* by AFLP Markers.**

In: *Plant Systematics and Evolution* 262 (1-2), p. 113–124. DOI: 10.1007/s00606-006-0460-7.

KARIMI, HAMID REZA; KAFKAS, SALIH (2011):

**Genetic Relationships among *Pistacia* Species studied by SAMPL Markers.**

In: *Plant Systematics and Evolution* 297 (3-4), p. 207–212. DOI: 10.1007/s00606-011-0508-1.

MILLER, ALLISON J.; YOUNG, DAVID A.; WEN, JUN (2001):

**Phylogeny and Biogeography of *Rhus* (Anacardiaceae) based on ITS Sequence Data.**

In: *International Journal of Plant Sciences* 162 (6), p. 1401–1407.

MITCHELL, JOHN D.; DALY, DOUGLAS C. (2015):

**A Revision of *Spondias* L. (Anacardiaceae) in the Neotropics.**

In: *PhytoKeys* (55), p. 1–92. DOI: 10.3897/phytokeys.55.8489.

NIE, ZE-LONG; SUN, HANG; MENG, YING; WEN, JUN (2009):

**Phylogenetic Analysis of *Toxicodendron* (Anacardiaceae) and its biogeographic Implications on the Evolution of north temperate and tropical intercontinental disjunctions.**

In: *Journal of Systematics and Evolution* 47 (5), p. 416–430. DOI: 10.1111/j.1759-6831.2009.00045.x.

PAN, YUE-ZHI; GONG, XUN; YANG, YANG (2008):

**Phylogenetic Position of the Genus *Dobinea*: Evidence from nucleotide Sequences of the Chloroplast Gene *rbcl* and the nuclear ribosomal ITS Region.**

In: Journal of Systematics and Evolution 46 (4), p. 586–594.

PELL, SUSAN K.; MITCHELL, JOHN D.; LOWRY, PORTER PRESCOTT II.; RANDRIANASOLO, ARMAND; URBATSCH, LOWELL E. (2008):

**Phylogenetic Split of Malagasy and African Taxa of *Protorhus* and *Rhus* (Anacardiaceae) based on cpDNA *trnL-trnF* and nrDNA ETS and ITS Sequence Data.**

In: Systematic Botany 33 (2), p. 375–383.

SILVA, JÉSSICA NAIANA; BEZERRA DA COSTA, ALINE; SILVA, JOSÉ VIEIRA; ALMEIDA, CICERO (2015):

**DNA barcoding and Phylogeny in Neotropical Species of the Genus *Spondias*.**

In: Biochemical Systematics and Ecology 61, p. 240–243. DOI: 10.1016/j.bse.2015.06.005.

TALEBI, MAJID; KAZEMI, MAHBOUBEH; SAYED-TABATABAEI, B. EBRAHIM (2012):

**Molecular Diversity and phylogenetic Relationships of *Pistacia vera*, *Pistacia atlantica* subsp. *mutica* and *Pistacia khinjuk* using SRAP Markers.**

In: Biochemical Systematics and Ecology 44, p. 179–185. DOI: 10.1016/j.bse.2012.05.013.

WANNAN, B. P. (2006):

**Analysis of Generic Relationships in Anacardiaceae.**

In: Blumea 51 (1), p. 165–195. DOI: 10.3767/000651906X622427.

XIE, LEI; YANG, ZHI-YUN; WEN, JUN; LI, DE-ZHU; YI, TING-SHUANG (2014):

**Biogeographic History of *Pistacia* (Anacardiaceae), emphasizing the Evolution of the Madrean-Tethyan and the eastern Asian-Tethyan disjunctions.**

In: Molecular Phylogenetics and Evolution 77, p. 136–146. DOI: 10.1016/j.ympev.2014.04.006.

YANG, YING-YING; MENG, YING; WEN, JUN; SUN, HANG; NIE, ZE-LONG (2016):

**Phylogenetic Analyses of *Searsia* (Anacardiaceae) from eastern Asia and its biogeographic disjunction with its African relatives.**

In: South African Journal of Botany 106, p. 129–136. DOI: 10.1016/j.sajb.2016.05.021.

YI, TING-SHUANG; MILLER, ALLISON J.; WEN, JUN (2004):

**Phylogenetic and biogeographic Diversification of *Rhus* (Anacardiaceae) in the Northern Hemisphere.**

In: Molecular Phylogenetics and Evolution 33 (3), p. 861–879. DOI: 10.1016/j.ympev.2004.07.006.

YI, TING-SHUANG; MILLER, ALLISON J.; WEN, JUN (2007):

**Phylogeny of *Rhus* (Anacardiaceae) based on Sequences of Nuclear NIA-13 Intron and Chloroplast *trnC-trnD*.**

In: Systematic Botany 32 (2), p. 379–391.

YI, TING-SHUANG; WEN, JUN; GOLAN-GOLDHIRSH, AVI; PARFITT, DAN E. (2008):

**Phylogenetics and reticulate Evolution in *Pistacia* (Anacardiaceae).**

In: American Journal of Botany 95 (2), p. 241–251.

## **Ancistrocladaceae**

MEIMBERG, HARALD; RISCHER, HEIKO; TURINI, FLORIAN G.; CHAMCHUMROON, VORADOL; DREYER, MICHAEL; SOMMARO, MARCELLA ET AL. (2010):

**Evidence for Species differentiation within the *Ancistrocladus tectorius* complex (Ancistrocladaceae) in Southeast Asia: a molecular approach.**

In: Plant Systematics and Evolution 284 (1-2), p. 77–98. DOI: 10.1007/s00606-009-0241-1.

TURINI, FLORIAN G.; STEINERT, CLAUDIA; HEUBL, GÜNTHER; BRINGMANN, GERHARD; LOMBE, B. KIMBADI; MUDOGO, VIRIMA; MEIMBERG, HARALD (2014):

**Microsatellites facilitate Species Delimitation in Congolese *Ancistrocladus* (Ancistrocladaceae), a Genus with pharmacologically potent naphthylisoquinoline alkaloids.**

In: Taxon 63 (2), p. 329–341. DOI: 10.12705/632.36.

## **Anemiaceae**

LABIAK, PAULO HENRIQUE; MICKEL, JOHN T.; HANKS, JUDITH GARRISON (2015):

**Molecular Phylogeny and Character Evolution of Anemiaceae (Schizaeales).**

In: Taxon 64 (6), p. 1141–1158. DOI: 10.12705/646.3.

SKOG, JUDITH E.; ZIMMER, ELIZABETH A.; MICKEL, JOHN T. (2002):

**Additional Support for two Subgenera of *Anemia* (Schizaeaceae) from Data for the Chloroplast Intergenic Spacer Region trnL-F and Morphology.**

In: American Fern Journal 92 (2), p. 119–130. DOI: 10.1640/0002-8444(2002)092[0119:ASFTSO]2.0.CO;2.

## **Angiospermae**

ANGIOSPERM PHYLOGENY GROUP III. THIS PAPER WAS COMPILED BY BIRGITTA BREMER, KÅRE BREMER (2009):

**An update of the Angiosperm Phylogeny Group: Classification for the Orders and Families of flowering Plants: APG.**

In: Botanical Journal of the Linnean Society 161, p. 105–121.

BEAULIEU, JEREMY M.; TANK, DAVID C.; DONOGHUE, MICHAEL J. (2013):

**A Southern Hemisphere Origin for Campanulid Angiosperms, with traces of the break-up of Gondwana.**

In: BMC Evolutionary Biology 13, p. 80. DOI: 10.1186/1471-2148-13-80.

BELL, CHARLES D.; SOLTIS, DOUGLAS E.; SOLTIS, PAMELA P. (2010):

**The age and Diversification of the Angiosperms re-revisited.**

In: American Journal of Botany 97 (8), p. 1296–1303. DOI: 10.3732/ajb.0900346.

BREMER, KARE; BACKLUND, A.; SENBLAD, BENGT; SWENSON, ULF; ANDREASEN, K.; HJERTSON, M. ET AL. (2001):

**A phylogenetic Analysis of 100+ Genera and 50+ families of euasterids based on morphological and molecular Data with Notes on possible higher level morphological synapomorphies.**

In: Plant Systematics and Evolution 229, p. 137–169.

BURLEIGH, JOHN GORDON; BANSAL, MUKUL S.; EULENSTEIN, OLIVER; HARTMANN, STEFANIE; WEHE, ANDRÉ; VISION, TODD J. (2011):

**Genome-scale Phylogenetics: Inferring the plant Tree of life from 18,896 Gene Trees.**

In: Systematic Biology 60 (2), p. 117–125. DOI: 10.1093/sysbio/syq072.

CAI, ZHENGQIU; PEÑAFLOR, CYNTHIA; KUEHL, JENNIFER V.; LEEBENS-MACK, JAMES H.; CARLSON, JOHN E.; DEPAMPHILIS, CLAUDE W. ET AL. (2006):

**Complete Plastid Genome Sequences of *Drimys*, *Liriodendron*, and *Piper*. Implications for the phylogenetic Relationships of magnoliids.**

In: BMC Evolutionary Biology 6, p. 77. DOI: 10.1186/1471-2148-6-77.

CHASE, MARK W.; REVEAL, JAMES L. (2009):

**A phylogenetic Classification of the land plants to accompany APG III.**

In: Botanical Journal of the Linnean Society (161), p. 122–127.

- DREW, BRYAN T.; RUHFEL, BRADLEY R.; SMITH, STEPHEN A.; MOORE, MICHAEL J.; BRIGGS, BARBARA G.; GITZENDANNER, MATTHEW A. ET AL. (2014):  
**Another look at the root of the Angiosperms reveals a familiar tale.**  
In: Systematic Biology 63 (3), p. 368–382. DOI: 10.1093/sysbio/syt108.
- FIZ-PALACIOS, OMAR; SCHNEIDER, HARALD; HEINRICHS, JOCHEN; SAVOLAINEN, VINCENT (2011):  
**Diversification of land plants: Insights from a Family-level phylogenetic Analysis.**  
In: BMC Evolutionary Biology 11, p. 341. DOI: 10.1186/1471-2148-11-341.
- GOREMYKIN, VADIM V.; NIKIFOROVA, SVETLANA V.; BIGGS, PATRICK J.; ZHONG, BOJIAN; DELANGE, PETER; MARTIN, WILLIAM ET AL. (2013):  
**The evolutionary root of Flowering Plants.**  
In: Systematic Biology 62 (1), p. 50–61. DOI: 10.1093/sysbio/sys070.
- GROUP, ANGIOSPERM PHYLOGENY (2016):  
**An update of the Angiosperm Phylogeny Group An update of the Angiosperm Phylogeny Group Classification for the orders and families of Flowering Plants: APG IV.**  
In: Botanical Journal of the Linnean Society 181, p. 1–20.
- HANSEN, DEBRA R.; DASTIDAR, SAYANTANI G.; CAI, ZHENGQIU; PEÑAFLOR, CYNTHIA; KUEHL, JENNIFER V.; BOORE, JEFFREY L.; JANSEN, ROBERT K. (2007):  
**Phylogenetic and evolutionary Implications of complete Chloroplast Genome Sequences of four early-diverging Angiosperms. *Buxus* (Buxaceae), *Chloranthus* (Chloranthaceae), *Dioscorea* (Dioscoreaceae), and *Illicium* (Schisandraceae).**  
In: Molecular Phylogenetics and Evolution 45 (2), p. 547–563. DOI: 10.1016/j.ympev.2007.06.004.
- HILU, KHIDIR W.; BLACK, CHELSEA; DIOUF, DIAGA; BURLEIGH, JOHN GORDON (2008):  
**Phylogenetic signal in matK vs. trnK. A case Study in early diverging Eudicots (Angiosperms).**  
In: Molecular Phylogenetics and Evolution 48 (3), p. 1120–1130. DOI: 10.1016/j.ympev.2008.05.021.
- KIM, SANGTAE; SOLTIS, DOUGLAS E.; SOLTIS, PAMELA S.; ZANIS, MICHAEL J.; SUH, YOUNGBAE (2004):  
**Phylogenetic Relationships among early-diverging Eudicots based on four Genes. Were the Eudicots ancestrally woody?**  
In: Molecular Phylogenetics and Evolution 31 (1), p. 16–30. DOI: 10.1016/j.ympev.2003.07.017.
- MAGALLÓN, SUSANA (2010):  
**Using fossils to break long branches in molecular dating. A Comparison of relaxed Clocks applied to the Origin of Angiosperms.**  
In: Systematic Biology 59 (4), p. 384–399. DOI: 10.1093/sysbio/syq027.
- MAIA, VITOR H.; GITZENDANNER, MATTHEW A.; SOLTIS, PAMELA S.; WONG, GANE KA-SHU; SOLTIS, DOUGLAS E. (2014):  
**Angiosperm Phylogeny based on 18s/26s rDNA Sequence Data: Constructing a large Data Set using Next-Generation Sequence Data.**  
In: International Journal of Plant Sciences 175 (6), p. 613–650. DOI: 10.1086/676675.
- MASSONI, JULIEN; FOREST, FÉLIX; SAUQUET, HERVÉ (2014):  
**Increased Sampling of both Genes and Taxa improves Resolution of phylogenetic Relationships within Magnoliidae, a large and early-diverging Clade of Angiosperms.**  
In: Molecular Phylogenetics and Evolution 70, p. 84–93. DOI: 10.1016/j.ympev.2013.09.010.
- MOORE, MICHAEL J.; HASSAN, NASR; GITZENDANNER, MATTHEW A.; BRUENN, RIVA A.; CROLEY, MATTHEW; VANDEVENTER, ALEXIA ET AL. (2011):

**Phylogenetic Analysis of the Plastid inverted repeat for 244 Species. Insights into Deeper-Level Angiosperm Relationships from a long, slowly evolving Sequence Region.**

In: *International Journal of Plant Sciences* 172 (4), p. 541–558. DOI: 10.1086/658923.

**OLMSTEAD, RICHARD G.; KIM, K. J.; JANSEN, ROBERT K.; WAGSTAFF, STEVEN J. (2000):**

**The Phylogeny of the Asteridae sensu lato based on Chloroplast ndhF Gene Sequences.**

In: *Molecular Phylogenetics and Evolution* 16 (1), p. 96–112. DOI: 10.1006/mpev.1999.0769.

**OXELMAN, BENGT; YOSHIKAWA, NORI; MCCONAUGHY, BETTY L.; LUO, JIE; DENTON, AMY L.; HALL, BENJAMIN D. (2004):**  
**Rpb2 Gene Phylogeny in Flowering Plants, with particular Emphasis on Asterids.**

In: *Molecular Phylogenetics and Evolution* 32 (2), p. 462–479. DOI: 10.1016/j.ympev.2004.01.014.

**PIRANI, JOSÉ RUBENS; PRADO, JEFFERSON (2012):**

**Embryopsida, a new Name for the Class of Land Plants.**

In: *Taxon* 61 (5), p. 1096–1098.

**REYES, ELISABETH; SAUQUET, HERVÉ; NADOT, SOPHIE (2016):**

**Perianth Symmetry Changed at least 199 times in Angiosperm Evolution.**

In: *Taxon* 65 (5), p. 945–964. DOI: 10.12705/655.1.

**SHI, SU-HUA; HUANG, YE-LIN; ZENG, KAI; TAN, FENGXIAO; HE, HANGHANG; HUANG, JIANZI; FU, YUNXIN (2005):**

**Molecular phylogenetic Analysis of Mangroves. Independent evolutionary Origins of Vivipary and Salt Secretion.**

In: *Molecular Phylogenetics and Evolution* 34 (1), p. 159–166. DOI: 10.1016/j.ympev.2004.09.002.

**SOLTIS, DOUGLAS E.; SMITH, STEPHEN A.; CELLINESE, NICOLETTA; WURDACK, KENNETH J.J.; TANK, DAVID C.; BROCKINGTON, SAMUEL F. ET AL. (2011):**

**Angiosperm Phylogeny. 17 genes, 640 taxa.**

In: *American Journal of Botany* 98 (4), p. 704–730. DOI: 10.3732/ajb.1000404.

**SUN, MIAO; NAEEM, REHAN; SU, JUN-XIA; CAO, ZHI-YONG; BURLEIGH, JOHN GORDON; SOLTIS, PAMELA P. ET AL. (2016):**  
**Phylogeny of the Rosidae : A dense Taxon Sampling Analysis.**

In: *Journal of Systematics and Evolution* 54 (4), p. 363–391. DOI: 10.1111/jse.12211.

**SUN, MIAO; SOLTIS, DOUGLAS E.; SOLTIS, PAMELA S.; ZHU, XINYU; BURLEIGH, JOHN GORDON; CHEN, ZHI-DUAN (2015):**  
**Deep phylogenetic Incongruence in the Angiosperm Clade Rosidae.**

In: *Molecular Phylogenetics and Evolution* 83, p. 156–166. DOI: 10.1016/j.ympev.2014.11.003.

**SUN, YANXIA; MOORE, MICHAEL J.; ZHANG, SHOUJUN; SOLTIS, PAMELA S.; SOLTIS, DOUGLAS E.; ZHAO, TINGTING ET AL. (2016):**

**Phylogenomic and structural Analyses of 18 complete Plastomes across nearly all Families of early-diverging Eudicots, including an Angiosperm-wide Analysis of Ir Gene Content Evolution.**

In: *Molecular Phylogenetics and Evolution* 96, p. 93–101. DOI: 10.1016/j.ympev.2015.12.006.

**TANK, DAVID C.; DONOGHUE, MICHAEL J. (2010):**

**Phylogeny and phylogenetic Nomenclature of the Campanulidae based on an expanded Sample of Genes and Taxa.**

In: *Systematic Botany* 35 (2), p. 425–441. DOI: 10.1600/036364410791638306.

**WINKWORTH, RICHARD C.; LUNDBERG, JOHANNES; DONOGHUE, MICHAEL J. (2008):**

**Toward a resolution of Campanulid Phylogeny, with special Reference to the Placement of Dipsacales.**

In: Taxon 57 (1), p. 53–65.

ZHAO, LEI; LI, XIA; ZHANG, NING; ZHANG, SHU-DONG; YI, TING-SHUANG; MA, HONG ET AL. (2016):  
**Phylogenomic Analyses of large-scale nuclear Genes provide new Insights into the evolutionary Relationships within the Rosids.**

In: Molecular Phylogenetics and Evolution 105, p. 166–176. DOI: 10.1016/j.ympev.2016.06.007.

ZHU, XIN-YU; CHASE, MARK W.; QIU, YIN-LONG; KONG, HONG-ZHI; DILCHER, DAVID L.; LI, JIAN-HUA; CHEN, ZHI-DUAN (2007):

**Mitochondrial matR Sequences help to resolve deep phylogenetic Relationships in Rosids.**

In: BMC Evolutionary Biology 7, p. 217. DOI: 10.1186/1471-2148-7-217.

## Anisophylleaceae

CHEN, XIN; HE, HAI; ZHANG, LI-BING (2015):

**A monograph of the Anisophylleaceae (Cucurbitales) with Description of 18 new Species of *Anisophyllea*.**

In: Phytotaxa 229 (1), p. 1. DOI: 10.11646/phytotaxa.229.1.1.

ZHANG, LI-BING; SIMMONS, MARK P.; RENNER, SUSANNE P. (2007):

**A Phylogeny of Anisophylleaceae based on six nuclear and Plastid Loci: ancient Disjunctions and recent Dispersal between South America, Africa, and Asia.**

In: Molecular Phylogenetics and Evolution 44 (3), p. 1057–1067. DOI: 10.1016/j.ympev.2007.03.002.

## Annonaceae

BOTERMANS, MARLEEN; SOSEF, MARC P. M.; CHATROU, LARS W.; COUVREUR, THOMAS L.P. (2011):

**Revision of the African Genus *Hexalobus* (Annonaceae).**

In: Systematic Botany 36 (1), p. 33–48. DOI: 10.1600/036364411X553108.

CHAOWASKU, TANAWAT; JOHNSON, DAVID M.; HAM, RAYMOND W.J.M. VAN DER; CHATROU, LARS W. (2012):

**Characterization of *Hubera* (Annonaceae), a new Genus segregated from *Polyalthia* and allied to *Miliusa*.**

In: Phytotaxa 69, p. 33–56.

CHAOWASKU, TANAWAT; KEBLER, PAUL J.A.; VAN DER HAM, RAYMOND W. J. M. (2012):

**A taxonomic Revision and Pollen Morphology of the Genus *Dendrokingstonia* (Annonaceae).**

In: Botanical Journal of the Linnean Society 168 (1), p. 76–90. DOI: 10.1111/j.1095-8339.2011.01187.x.

CHAOWASKU, TANAWAT; THOMAS, DANIEL C.; VAN DER HAM, RAYMOND W. J. M.; SMETS, ERIC F.; MOLS, JOHAN B.; CHATROU, LARS W. (2014):

**A Plastid DNA Phylogeny of Tribe Miliuseae. Insights into Relationships and Character Evolution in one of the most recalcitrant major Clades of Annonaceae.**

In: American Journal of Botany 101 (4), p. 691–709. DOI: 10.3732/ajb.1300403.

CHATROU, LARS W.; PIRIE, MICHAEL D.; ERKENS, ROY H.J.; COUVREUR, THOMAS L.P.; NEUBIG, KURT M.; ABBOTT, RICHARD J. ET AL. (2012):

**A new subfamilial and tribal Classification of the pantropical flowering Plant Family Annonaceae informed by molecular Phylogenetics.**

In: Botanical Journal of the Linnean Society 169 (1), p. 5–40. DOI: 10.1111/j.1095-8339.2012.01235.x.

COUVREUR, T. L. P.; RICHARDSON, JAMES E.; SOSEF, MARC P. M.; ERKENS, ROY H.J.; CHATROU, LARS W. (2008):

**Evolution of syncarpy and other morphological Characters in African Annonaceae. A posterior mapping approach.**

- In: *Molecular Phylogenetics and Evolution* 47 (1), p. 302–318. DOI: 10.1016/j.ympev.2008.01.018.
- COUVREUR, THOMAS L.P.; VAN DER HAM, RAYMOND W. J. M.; MBELE, YOUSOUFA M.; MBAGO, FRANK M.; JOHNSON, DAVID M. (2009):  
**Molecular and morphological Characterization of a new monotypic Genus of Annonaceae, *Mwasumbia* from Tanzania.**  
In: *Systematic Botany* 34 (2), p. 266–276. DOI: 10.1600/036364409788606398.
- ERKENS, ROY H.J.; CHATROU, LARS W.; CHAOWASKU, TANAWAT; WESTRA, LUBBERT Y. TH.; MAAS, JAN W.A.N.; MAAS, PAUL J.M. (2014):  
**A decade of uncertainty: Resolving the phylogenetic Position of *Diclinanona* (Annonaceae), including taxonomic Notes and a key to the Species.**  
In: *Taxon* 63 (6), p. 1244–1252. DOI: 10.12705/636.34.
- ERKENS, ROY H.J.; CHATROU, LARS W.; KOEK-NOORMAN, JIFKE; MAAS, JAN W.A.N.; MAAS, PAUL J.M. (2007):  
**Classification of a large and widespread Genus of Neotropical Trees, *Gutteria* (Annonaceae) and its three satellite Genera *Gutteriella*, *Gutteriopsis* and *Heteropetalum*.**  
In: *Taxon* 56 (3), p. 757–774.
- ERKENS, ROY H.J.; CHATROU, LARS W.; MAAS, JAN W.A.N.; VAN DER NIET, TIMOTHEÛS; SAVOLAINEN, VINCENT (2007):  
**A rapid Diversification of Rainforest Trees (*Gutteria*; Annonaceae) following Dispersal from Central into South America.**  
In: *Molecular Phylogenetics and Evolution* 44 (1), p. 399–411. DOI: 10.1016/j.ympev.2007.02.017.
- GOTTSBERGER, GERHARD (2016):  
**The reproductive biology of the early-divergent Genus *Anaxagorea* (Annonaceae), and its Significance for the evolutionary development of the Family.**  
In: *Acta Botanica Brasilica* 30 (2), p. 313–325. DOI: 10.1590/0102-33062015abb0311.
- GUO, XING; HOEKSTRA, PAUL H.; TANG, CHIN CHEUNG; THOMAS, DANIEL C.; WIERINGA, JAN J.; CHATROU, LARS W.; SAUNDERS, RICHARD M.K. (2017):  
**Cutting up the climbers: Evidence for extensive Polyphyly in *Friesodielsia* (Annonaceae) necessitates generic Realignment across the Tribe Uvarieae.**  
In: *Taxon* 66 (1), p. 3–19. DOI: 10.12705/661.1.
- GUO, XING; TANG, CHIN CHEUNG; THOMAS, DANIEL C.; COUVREUR, THOMAS L.P.; SAUNDERS, RICHARD M.K. (2017):  
**A mega-phylogeny of the Annonaceae: taxonomic Placement of five enigmatic Genera and support for a new Tribe, Phoenicantheae.**  
In: *Scientific Reports* 7 (1), p. 7323. DOI: 10.1038/s41598-017-07252-2.
- GUO, XING; THOMAS, DANIEL C.; SAUNDERS, RICHARD M.K. (2018):  
**Gene Tree discordance and coalescent Methods support ancient intergeneric Hybridisation between *Dasymaschalon* and *Friesodielsia* (Annonaceae).**  
In: *Molecular Phylogenetics and Evolution* 127, p. 14–29. DOI: 10.1016/j.ympev.2018.04.009.
- GUO, XING; WANG, JING; XUE, BINE; THOMAS, DANIEL C.; SU, YVONNE C.F.; TAN, YUN-HONG; SAUNDERS, RICHARD M.K. (2014):  
**Reassessing the taxonomic Status of two enigmatic *Desmos* Species (Annonaceae). morphological and molecular phylogenetic Support for a new Genus, *Wangia*.**  
In: *Journal of Systematics and Evolution* 52 (1), p. 1–15. DOI: 10.1111/jse.12064.
- HOEKSTRA, PAUL H.; WIERINGA, JAN J.; SMETS, ERIK; BRANDÃO, RITA D.; LOPES, JENIFER DE CARVALHO; ERKENS, ROY H.J.; CHATROU, LARS W. (2017):  
**Correlated evolutionary Rates across genomic Compartments in Annonaceae.**



- In: *Molecular Phylogenetics and Evolution* 114, p. 63–72. DOI: 10.1016/j.ympev.2017.05.026.
- LI, PUI-SZE; THOMAS, DANIEL C.; SAUNDERS, RICHARD M.K. (2015):  
**Phylogenetic Reconstruction, morphological Diversification and Generic Delimitation of *Disepalum* (Annonaceae).**  
In: *Public Library of Science One* 10 (12), e0143481. DOI: 10.1371/journal.pone.0143481.
- LOPES, J. C.; CHATROU, LARS W.; MELLO-SILVA, RENATO; RUDALL, PAULA J.; SAJO, M. G. (2018):  
**Phylogenomics and Evolution of Floral traits in the Neotropical Tribe Malmeeae (Annonaceae).**  
In: *Molecular Phylogenetics and Evolution* 118, p. 379–391. DOI: 10.1016/j.ympev.2017.10.020.
- MAAS, PAUL J.M.; WESTRA, L.Y.T.; GUERRERO, P. ARIAS; LOBÃO, ADRIANA Q.; SCHARF, UWE; ZAMORA, N. A.; ERKENS, ROY H.J. (2015):  
**Confronting a morphological nightmare: Revision of the Neotropical Genus *Gutteria* (Annonaceae).**  
In: *Blumea* 60 (1), p. 1–219. DOI: 10.3767/000651915X690341.
- MAAS, PAUL J.M.; WESTRA, LUBBERT Y. TH.; RAINER, HEIMO; LOBÃO, ADRIANA Q.; ERKENS, ROY H.J. (2011):  
**An updated index to Genera, Species, and infraspecific Taxa of Neotropical Annonaceae.**  
In: *Nordic Journal of Botany* 29 (3), p. 257–356. DOI: 10.1111/j.1756-1051.2011.01092.x.
- MAAS, ROY H. J. ERKENS & PAUL J. M. (2008):  
**The *Gutteria* Group disentangled: sinling *Gutteriopsis*, *Gutteriella* and *Heteropetalum* into *Gutteria*.**  
In: *Rodriguésia* 59 (2), p. 401–406.
- MERCER, ELIZABETH; GRIFFIN, BRANDI; STEELE, JOSHUA; GOODRICH, KATHERINE R.; BUSH, CATHERINE M. (2016):  
**Phylogenetic Relationships of *Asimina* and *Deeringothamnus* (Annonaceae) based on Morphology, Floral scent Chemistry, and Inter-Simple Sequence Repeat Data.**  
In: *the Journal of the Torrey Botanical Society* 143 (1), p. 58–68. DOI: 10.3159/TORREY-D-14-00045.1.
- MOLS, JOHAN B.; GRAVENDEEL, BARBARA; CHATROU, LARS W.; PIRIE, MICHAEL D.; BYGRAVE, PAUL C.; CHASE, MARK W.; KEBLER, PAUL J.A. (2004):  
**Identifying Clades in Asian Annonaceae. Monophyletic Genera in the polyphyletic Miliuseae.**  
In: *American Journal of Botany* 91 (4), p. 590–600. DOI: 10.3732/ajb.91.4.590.
- MOLS, JOHAN B.; KEBLER, PAUL J.A.; ROGSTAD, STEVEN H.; SAUNDERS, RICHARD M.K. (2008):  
**Reassignment of six *Polyalthia* Species to the new Genus *Maasia* (Annonaceae): molecular and morphological Congruence.**  
In: *Systematic Botany* 33 (3), p. 490–494.
- NAKKUNTOD, MALIWAN; SU, YVONNE C.F.; SEELANAN, TOSAK SAUNDERS; SAUNDERS, RICHARD M.K. (2009):  
**Molecular phylogenetic and morphological Evidence for the congeneric Status of *Goniothalamus* and *Richella* (Annonaceae).**  
In: *Taxon* 58 (1), p. 127–132.
- ORTIZ-RODRIGUEZ, ANDRÉS ERNESTO; ORNELAS, JUAN FRANCISCO; RUIZ-SANCHEZ, EDUARDO (2018):  
**A jungle tale: molecular Phylogeny and Divergence time estimates of the *Desmopsis-Stenanona* Clade (Annonaceae) in Mesoamerica.**  
In: *Molecular Phylogenetics and Evolution* 122, p. 80–94. DOI: 10.1016/j.ympev.2018.01.021.

- PIRIE, MICHAEL D.; VARGAS, MARIA PAULA BALCÁZAR; BOTERMANS, MARLEEN; BAKKER, FREEK T.; CHATROU, LARS W. (2007):  
**Ancient Paralogy in the cpDNA trnL-F Region in Annonaceae. Implications for Plant molecular Systematics.**  
In: American Journal of Botany 94 (6), p. 1003–1016. DOI: 10.3732/ajb.94.6.1003.
- RAINER, HEIMO (2007):  
**Monographic studies in the Genus *Annona* L. (Annonaceae): Inclusion of the Genus *Rollinia* A.ST.-Hil.**  
In: Annalen des Naturhistorischen Museums in Wien, Serie B 108B, p. 191–205.
- SAUNDERS, RICHARD M.K.; SU, YVONNE C.F.; XUE, BINE (2011):  
**Phylogenetic affinities of *Polyalthia* Species (Annonaceae) with columellar-sulcate Pollen: Enlarging the Madagascan endemic Genus *Fenerivia*.**  
In: Taxon 60 (5), p. 1407–1416.
- SAUNDERS, RICHARD M.K.; WANG, JING (2011):  
**Five new nomenclatural Combinations in *Dasymaschalon* and *Goniothalamus* (Annonaceae).**  
In: Nordic Journal of Botany 29 (6), p. 674–676. DOI: 10.1111/j.1756-1051.2011.01293.x.
- SCHARASCHKIN, TANYA; DOYLE, JAMES A. (2005):  
**Phylogeny and Historical Biogeography of *Anaxagorea* (Annonaceae) using Morphology and Non-Coding Chloroplast Sequence Data.**  
In: Systematic Botany 30 (4), p. 712–735. DOI: 10.1600/036364405775097888.
- SU, YVONNE C.F.; CHAOWASKU, TANAWAT; SAUNDERS, RICHARD M.K. (2010):  
**An extended Phylogeny of *Pseuduvaria* (Annonaceae) with Descriptions of three new Species and a Reassessment of the generic Status of *Oreomitra*.**  
In: Systematic Botany 35 (1), p. 30–39. DOI: 10.1600/036364410790862533.
- SU, YVONNE C.F.; MOLS, JOHAN B.; TAKEUCHI, WAYNE N.; KEBLER, PAUL J.A.; SAUNDERS, RICHARD M.K. (2005):  
**Reassessing the generic Status of *Petalolophus* (Annonaceae): Evidence for the Evolution of a distinct sapromyophilous Lineage within *Pseuduvaria*.**  
In: Systematic Botany 30 (3), p. 494–502.
- SU, YVONNE C.F.; SAUNDERS, RICHARD M.K. (2009):  
**Evolutionary Divergence times in the Annonaceae. Evidence of a late Miocene Origin of *Pseuduvaria* in Sundaland with subsequent Diversification in New Guinea.**  
In: BMC Evolutionary Biology 9, p. 153. DOI: 10.1186/1471-2148-9-153.
- SU, YVONNE C.F.; SMITH, GAVIN J. D.; SAUNDERS, RICHARD M.K. (2008):  
**Phylogeny of the basal Angiosperm Genus *Pseuduvaria* (Annonaceae) inferred from five Chloroplast DNA Regions, with interpretation of morphological Character Evolution.**  
In: Molecular Phylogenetics and Evolution 48 (1), p. 188–206. DOI: 10.1016/j.ympev.2008.03.028.
- SURVESWARAN, SIDDHARTHAN; WANG, RUI-JIANG; SU, YVONNE C.F.; SAUNDERS, RICHARD M.K. (2010):  
**Generic Delimitation and historical Biogeography in the early-divergent 'ambavioid' Lineage of Annonaceae: *Cananga*, *Cyathocalyx* and *Drepananthus*.**  
In: Taxon 59 (6), p. 1721–1734.
- TANG, CHIN CHEUNG; THOMAS, DANIEL C.; SAUNDERS, RICHARD M.K. (2015):

- Molecular Phylogenetics of the species-rich Angiosperm Genus *Goniothalamus* (Annonaceae) inferred from nine Chloroplast DNA Regions. Synapomorphies and putative correlated evolutionary Changes in Fruit and Seed Morphology.**  
In: *Molecular Phylogenetics and Evolution* 92, p. 124–139. DOI: 10.1016/j.ympev.2015.06.016.
- THOMAS, DANIEL C.; CHATROU, LARS W.; STULL, GREGORY W.; JOHNSON, DAVID M.; HARRIS, DAVID J.; THONGPAIROJ, U-SA; SAUNDERS, RICHARD M.K. (2015):  
**The historical Origins of palaeotropical intercontinental Disjunctions in the pantropical flowering plant Family Annonaceae.**  
In: *Perspectives in Plant Ecology, Evolution and Systematics* 17 (1), p. 1–16. DOI: 10.1016/j.ppees.2014.11.001.
- THOMAS, DANIEL C.; SURVESWARAN, SIDDHARTHAN; XUE, BINE; SANKOWSKY, GARRY; MOLS, JOHAN B. (2012):  
**Molecular Phylogenetics and historical Biogeography of the *Meiogyne-Fitzalania* Clade (Annonaceae): Generic Paraphyly and late Miocene-Pliocene Diversification in Australasia and the Pacific.**  
In: *Taxon* 61 (3), p. 559–575.
- TURNER, IAN M. (2012):  
**A new Combination in *Monocarpia* (Annonaceae).**  
In: *Edinburgh Journal of Botany* 69 (01), p. 95–98. DOI: 10.1017/S0960428611000424.
- TURNER, IAN M. (2015):  
**A Conspectus of Indo-Burmese Annonaceae.**  
In: *Nordic Journal of Botany* 33 (3), p. 257–299. DOI: 10.1111/njb.00689.
- TURNER, IAN M.; UTTERIDGE, TIMOTHY M.A. (2015):  
**A new Species and a new Combination in *Meiogyne* (Annonaceae) of New Guinea. Contributions to the Flora of Mt Jaya, XXI.**  
In: *Kew Bulletin* 70 (2). DOI: 10.1007/S12225-015-9577-6.
- VAN ZUILEN, CAROLINA M.; KOEK-NOORMAN, JIFKE; MAAS, PAUL J.M. (1995):  
**A phylogenetic Analysis of *Duguetia* (Annonaceae) based on morphological Data.**  
In: *Plant Systematics and Evolution* 194, p. 173–188.
- WANG, JING; THOMAS, DANIEL C.; SU, YVONNE C.F.; MEINKE, SVENJA; CHATROU, LARS W. (2012):  
**A Plastid DNA Phylogeny of *Dasymaschalon* (Annonaceae) and allied Genera: Evidence for generic non-Monophyly and the parallel evolutionary loss of inner petals.**  
In: *Taxon* 61 (3), p. 545–558.
- XUE, BINE; SU, YVONNE C.F.; THOMAS, DANIEL C.; SAUNDERS, RICHARD M.K. (2012):  
**Pruning the polyphyletic Genus *Polyalthia* (Annonaceae) and resurrecting the Genus *Monoon*.**  
In: *Taxon* 61 (5), p. 1021–1039.
- XUE, BINE; TAN, YUN-HONG; YE, XING-ER (2016):  
**The identity of *Polyalthia florulenta* (Annonaceae): a second Species of *Wangia* in China.**  
In: *Phytotaxa* 283 (2), p. 163–171. <http://www.mapress.com/j/pt/article/download/phytotaxa.283.2.5/9246>.
- XUE, BINE; THOMAS, DANIEL C.; CHAOWASKU, TANAWAT; JOHNSON, DAVID M.; SAUNDERS, RICHARD M.K. (2014):  
**Molecular phylogenetic Support for the taxonomic Merger of *Fitzalania* and *Meiogyne* (Annonaceae). new nomenclatural Combinations under the conserved Name *Meiogyne*.**

In: Systematic Botany 39 (2), p. 396–404. DOI: 10.1600/036364414X680825.

ZHOU, LINLIN; SU, YVONNE C.F.; CHALERMGLIN, PIYA; SAUNDERS, RICHARD M.K. (2010):  
**Molecular Phylogenetics of *Uvaria* (Annonaceae). Relationships with *Balonga*,  
*Dasoclema* and Australian Species of *Melodorum*.**

In: Botanical Journal of the Linnean Society 163 (1), p. 33–43. DOI: 10.1111/j.1095-8339.2010.01045.x.

ZHOU, LINLIN; SU, YVONNE C.F.; THOMAS, DANIEL C.; SAUNDERS, RICHARD M.K. (2012):  
**'Out-of-Africa' Dispersal of tropical Floras during the Miocene climatic Optimum.  
Evidence from *Uvaria* (Annonaceae).**

In: Journal of Biogeography 39 (2), p. 322–335. DOI: 10.1111/j.1365-2699.2011.02598.x.

## Anthericaceae

BJORÅ, CHARLOTTE SLETTEN; HEMP, ANDREAS; HOELL, GRY; NORDAL, INGER (2008):  
**A taxonomic and ecological Analysis of two Forest *Chlorophytum* Taxa  
(Anthericaceae) on Mount Kilimanjaro, Tanzania.**

In: Plant Systematics and Evolution 274 (3-4), p. 243–253. DOI: 10.1007/s00606-008-0032-0.

BJORÅ, CHARLOTTE SLETTEN; HOELL, GRY; KATIVU, SHAKKIE; NORDAL, INGER (2008):  
**New Taxa of *Chlorophytum* (Anthericaceae) from southern tropical Africa with Notes  
on their sister Group Relationships.**

In: Botanical Journal of the Linnean Society 157 (2), p. 223–238. DOI: 10.1111/j.1095-8339.2008.00811.x.

CRUDEN, ROBERT WILLIAM (2009):  
**A Synopsis of South American *Echeandia* (Anthericaceae).**

In: Annals of the Missouri Botanical Garden 96 (2), p. 251–267. DOI: 10.3417/2002129.

KATOCH, MEENU; KUMAR, RAJINDER; PAL, SWADESH; AHUJA, ASHOK (2010):  
**Identification of *Chlorophytum* Species (*C. borivilianum*, *C. arundinaceum*, *C. laxum*,  
*C. capense* and *C. comosum*) using molecular Markers.**

In: Industrial Crops and Products 32 (3), p. 389–393. DOI: 10.1016/j.indcrop.2010.06.001.

MEERTS, PIERRE; BJORÅ, CHARLOTTE SLETTEN (2012):  
**Synopsis of the Genus *Chlorophytum* (Asparagaceae) in Central Africa (Democratic  
Republic of the Congo, Rwanda, Burundi).**

In: Plant Ecology and Evolution 145 (3), p. 373–409. DOI: 10.5091/plecevo.2012.668.

## Apiaceae

AJANI, YOUSEF; AJANI, AHMAD; CORDES, JENNY M.; WATSON, MARK F.; DOWNIE, STEPHEN R. (2008):  
**Phylogenetic Analysis of nrDNA ITS Sequences reveals Relationships within five  
Groups of Iranian Apiaceae Subfamily Apioideae.**

In: Taxon, p. 383–401.

AJANI, YOUSEF; AJANI, AHMAD; CORDES, JENNY M.; WATSON, MARK F.; DOWNIE, STEPHEN R. (2008):  
**Phylogenetic Analysis of nrDNA ITS Sequences reveals Relationships within five  
Groups of Iranian Apiaceae Subfamily Apioideae.**

In: Taxon 57 (2), p. 383–401.

ALIABADIAN, MANSOUR; KABOLI, MOHAMMAD; PRODON, ROGER; NIJMAN, VINCENT; VENCES, MIGUEL (2007):  
**Phylogeny of Palearctic wheatears (genus *Oenanthe*)--congruence between  
morphometric and molecular Data.**

In: Molecular Phylogenetics and Evolution 42 (3), p. 665–675. DOI: 10.1016/j.ympev.2006.08.018.

ANDERSSON, LENNART; KOCSIS, MARIANNA; ERIKSSON, ROGER (2006):

**Relationships of the Genus *Azorella* (Apiaceae) and other hydrocotyloids inferred from Sequence Variation in three Plastid Markers.**

In: *Taxon* 55 (2), p. 270–280.

ARBIZU, CARLOS; REITSMA, KATHLEEN R.; SIMON, PHILIPP W.; SPOONER, DAVID M. (2014):

**Morphometrics of *Daucus* (Apiaceae): a Counterpart to a phylogenomic Study.**

In: *American Journal of Botany* 101 (11), p. 2005–2016. DOI: 10.3732/ajb.1400252.

ARBIZU, CARLOS; RUESS, HOLLY; SENALIK, DOUGLAS; SIMON, PHILIPP W.; SPOONER, DAVID M. (2014):

**Phylogenomics of the Carrot Genus (*Daucus*, Apiaceae).**

In: *American Journal of Botany* 101 (10), p. 1666–1685. DOI: 10.3732/ajb.1400106.

BANASIAK, ŁUKASZ; WOJEWÓDZKA, ANETA; BACZYŃSKI, JAKUB; REDURON, JEAN-PIERRE; PIWCZYŃSKI, MARCIN; KURZYNA-MŁYNIK, RENATA ET AL. (2016):

**Phylogeny of Apiaceae Subtribe Daucinae and the taxonomic Delineation of its Genera.**

In: *Taxon* 65 (3), p. 563–585. DOI: 10.12705/653.8.

BONE, TIFFANY S.; DOWNIE, STEPHEN R.; AFFOLTER, JAMES M.; SPALIK, KRYSZTOF (2011):

**A phylogenetic and Biogeographic Study of the Genus *Lilaeopsis* (Apiaceae Tribe Oenantheae).**

In: *Systematic Botany* 36 (3), p. 789–805. DOI: 10.1600/036364411X583745.

BRULLO, CRISTIAN; BRULLO, SALVATORE; DOWNIE, STEPHEN R.; DANDERSON, CLARK A.; DEL GALDO, GIANPIETRO GIUSSO (2013):

***Siculosciadium*, a new monotypic Genus of Apiaceae from Sicily.**

In: *Annals of the Missouri Botanical Garden* 99 (1), p. 1–18. DOI: 10.3417/2011009.

CALVIÑO, CAROLINA ISABEL; DOWNIE, STEPHEN R. (2007):

**Circumscription and Phylogeny of Apiaceae Subfamily Saniculoideae based on Chloroplast DNA Sequences.**

In: *Molecular Phylogenetics and Evolution* 44 (1), p. 175–191. DOI: 10.1016/j.ympev.2007.01.002.

CALVIÑO, CAROLINA ISABEL; MARTÍNEZ, SUSANA G.; DOWNIE, STEPHEN R. (2008):

**Morphology and Biogeography of Apiaceae Subfamily Saniculoideae as inferred by phylogenetic Analysis of molecular Data.**

In: *American Journal of Botany* 95 (2), p. 196–214. DOI: 10.3732/ajb.95.2.196.

CALVIÑO, CAROLINA ISABEL; MARTÍNEZ, SUSANA G.; DOWNIE, STEPHEN R. (2008):

**The evolutionary History of *Eryngium* (Apiaceae, Saniculoideae): rapid Radiations, long distance Dispersals, and Hybridizations.**

In: *Molecular Phylogenetics and Evolution* 46 (3), p. 1129–1150. DOI: 10.1016/j.ympev.2007.10.021.

CALVIÑO, CAROLINA ISABEL; TILNEY, PATRICIA M.; VAN WYK, BEN-ERIK; DOWNIE, STEPHEN R. (2006):

**A molecular phylogenetic Study of southern African Apiaceae.**

In: *American Journal of Botany* 93 (12), p. 1828–1847. DOI: 10.3732/ajb.93.12.1828.

CASTRO, OLGA; CENNAMO, PAOLA; LUCA, PAOLO (2009):

**Analysis of the Genus *Petagnaea* Caruel (Apiaceae), using new molecular and Literature Data.**

In: *Plant Systematics and Evolution* 278 (3-4), p. 239–249. DOI: 10.1007/s00606-008-0133-9.

CHUNG, KUO-FANG (2007):

**Inclusion of the South Pacific Alpine Genus *Oreomyrrhis* (Apiaceae) in *Chaerophyllum* based on nuclear and Chloroplast DNA Sequences.**

- In: Systematic Botany 32 (3), p. 671–681. DOI: 10.1600/036364407782250517.
- CHUNG, KUO-FANG; PENG, CHING-I.; DOWNIE, STEPHEN R.; SPALIK, KRYSZTOF; SCHAAL, BARBARA A. (2005):  
Molecular Systematics of the trans-Pacific alpine Genus *Oreomyrrhis* (Apiaceae):  
phylogenetic affinities and biogeographic Implications.**  
In: American Journal of Botany 92 (12), p. 2054–2071. DOI: 10.3732/ajb.92.12.2054.
- ÇINBILGEL, İLKER; EREN, ÖZKAN; DUMAN, HAYRI; GÖKCEOĞLU, MUSTAFA (2015):  
*Pimpinella ibradiensis* (Apiaceae), an unusual new Species from Turkey.**  
In: Phytotaxa 217 (2), p. 164. DOI: 10.11646/phytotaxa.217.2.6.
- DANDERSON, CLARK A.; DOWNIE, STEPHEN R.; HERMANN, MICHAEL (2018):  
Rampant Polyphyly in the *Arracacia*-clade (Apiaceae) and an assessment of the  
phylogenetic Utility of 20 noncoding Plastid loci.**  
In: Molecular Phylogenetics and Evolution 118, p. 286–305. DOI: 10.1016/j.ympev.2017.10.006.
- DANDERSON, CLARK A.; HERMANN, MICHAEL; DOWNIE, STEPHEN R. (2008):  
Resolving phylogenetic Relationships within the *Arracacia*-clade (Apiaceae Subfamily  
Apioideae) using cpDNA Sequence Data.**  
University of Illinois Urbana-Champaign.
- DEGTJAREVA, GALINA V.; KLJUYKOV, EUGENE V.; SAMIGULLIN, TAHIR H.; VALIEJO-ROMAN, CARMEN M.; PIMENOV,  
MICHAEL G. (2013):  
ITS Phylogeny of Middle Asian geophilic Umbelliferae-Apioideae Genera with  
comments on their Morphology and Utility of psbA-trnH Sequences.**  
In: Plant Systematics and Evolution 299 (5), p. 985–1010. DOI: 10.1007/s00606-013-0779-9.
- DEGTJAREVA, GALINA V.; KLJUYKOV, EUGENE V.; SAMIGULLIN, TAHIR H.; VALIEJO-ROMAN, CARMEN M.; PIMENOV,  
MICHAEL G. (2009):  
Molecular appraisal of *Bunium* and some related arid and subarid geophilic  
Apiaceae-Apioideae Taxa of the Ancient Mediterranean.**  
In: Botanical Journal of the Linnean Society 160 (2), p. 149–170. DOI: 10.1111/j.1095-8339.2009.00970.x.
- DOĞAN, BEKİR; DURAN, AHMET; BAGCI, YAVUZ; DINC, MUHITTIN; MARTIN, ESRA; ÇETIN, ÖZLEM; ÖZTÜRK, MERYEM  
(2010):  
Phylogenetic Relationships among the Taxa of the Genus *Johrensia* DC. (Apiaceae)  
from Turkey based on molecular Method.**  
In: Bangladesh Journal of Plant Taxonomy 17 (2), p. 113–120.
- DOĞRU-KOCA, ASLI (2016):  
Phylogeny of the Genus *Tordylium* (Tordylieae, Apioideae, Apiaceae) inferred from  
morphological Data.**  
In: Nordic Journal of Botany 34 (1), p. 111–119. DOI: 10.1111/njb.00991.
- DOWNIE, STEPHEN R.; HARTMAN, RONALD L.; SUN, FENG-JIE; KATZ-DOWNIE, DEBORAH P. (2002):  
Polyphyly of the spring-parsleys (*Cymopterus*): molecular and morphological  
Evidence suggests complex Relationships among the perennial endemic Genera of  
western North American Apiaceae.**  
In: Canadian Journal of Botany 80 (12), p. 1295–1324. DOI: 10.1139/B02-119.
- DOWNIE, STEPHEN R.; KATZ-DOWNIE, DEBORAH S.; SPALIK, KRYSZTOF (2000):  
A Phylogeny of Apiaceae Tribe Scandiceae: Evidence from nuclear ribosomal DNA  
Internal Transcribed Spacer Sequences.**  
In: American Journal of Botany 87 (1), p. 76–95. DOI: 10.2307/2656687.

- DOWNIE, STEPHEN R.; KATZ-DOWNIE, DEBORAH S.; SUN, FENG-JIE; LEE, CHANG-SHOOK (2008):  
**Phylogeny and Biogeography of Apiaceae Tribe Oenantheae inferred from nuclear rDNA ITS and cpDNA psbI – 5'trnK(UUU) Sequences, with Emphasis on the North American Endemics Clade.**  
In: *Botany* 86 (9), p. 1039–1064. DOI: 10.1139/B08-055.
- DOWNIE, STEPHEN R.; SPALIK, KRYSZTOF; KATZ-DOWNIE, DEBORAH S.; REDURON, JEAN-PIERRE (2010):  
**Major Clades within Apiaceae Subfamily Apioideae as inferred by phylogenetic Analysis of nrDNA ITS Sequences.**  
In: *Plant Diversity and Evolution* 128 (1), p. 111–136. DOI: 10.1127/1869-6155/2010/0128-0005.
- DOWNIE, STEPHEN R.; WATSON, MARK F.; SPALIK, KRYSZTOF; KATZ-DOWNIE, DEBORAH P. (2000):  
**Molecular Systematics of Old World Apioideae (Apiaceae): Relationships among some Members of Tribe Peucedaneae sensu lato, the Placement of several Island-endemic Species, and Resolution within the apioid Superclade.**  
In: *Canadian Journal of Botany* 78 (4), p. 506–528. DOI: 10.1139/b00-029.
- FEIST, MARY ANN E.; DOWNIE, STEPHEN R. (2008):  
**A phylogenetic Study of *Oxypolis* and *Ptilimnium* (Apiaceae) based on nuclear rDNA ITS Sequences.**  
In: *Systematic Botany* 33 (2), p. 447–458. DOI: 10.1600/036364408784571509.
- FEIST, MARY ANN E.; DOWNIE, STEPHEN R.; MAGEE, ANTHONY RICHARD; LIU, MEI (2012):  
**Revised generic Delimitations for *Oxypolis* and *Ptilimnium* (Apiaceae) based on Leaf Morphology, comparative Fruit Anatomy, and phylogenetic Analysis of nuclear rDNA ITS and cpDNA trnQ-trnK intergenic Spacer Sequence Data.**  
In: *Taxon* 61 (2), p. 402–418.
- FENG, TU; DOWNIE, STEPHEN R.; YU, YANG; ZHANG, XUEMEI; CHEN, WEI-WEI; HE, XING-JIN; LIU, SHUANG (2009):  
**Molecular Systematics of *Angelica* and allied Genera (Apiaceae) from the Hengduan Mountains of China based on nrDNA ITS Sequences: phylogenetic affinities and biogeographic Implications.**  
In: *Journal of Plant Research* 122 (4), p. 403–414. DOI: 10.1007/s10265-009-0238-4.
- FERNÁNDEZ, MARTINA; EZCURRA, CECILIA; CALVIÑO, CAROLINA ISABEL (2017):  
**Chloroplast and ITS Phylogenies to understand the evolutionary History of southern South American *Azorella*, *Laretia* and *Mulinum* (Azorelloideae, Apiaceae).**  
In: *Molecular Phylogenetics and Evolution* 108, p. 1–21. DOI: 10.1016/j.ympev.2017.01.016.
- HAND, RALF (2011):  
**The Euro+Med Treatment of Apiaceae.**  
In: *Willdenowia* 41 (2), p. 245–250. DOI: 10.3372/wi.41.41205.
- HARTMAN, RONALD L.; NESOM, GUY L. (2012):  
**Taxonomy of the Genus *Vesper* (Apiaceae).**  
In: *Phytoneuron* 94, p. 1–9.
- HENWOOD, MURRAY J.; HART, J. M. (2001):  
**Towards an Understanding of the phylogenetic Relationships of Australian Hydrocotyloideae (Apiaceae).**  
In: *Edinburgh Journal of Botany* 58 (02). DOI: 10.1017/S0960428601000634.
- JIMENEZ-MEJIAS, PEDRO; VARGAS, PABLO (2015):

**Taxonomy of the Tribe Apieae (Apiaceae) revisited as revealed by molecular Phylogenies and morphological Characters.**

In: Phytotaxa 212 (1), p. 57. DOI: 10.11646/phytotaxa.212.1.2.

**KADEREIT, JOACHIM W.; REPPLINGER, MIRIAM; SCHMALZ, NATALIE; UHINK, CHRISTIAN H.; WÖRZ, ARNO (2008):**

**The Phylogeny and Biogeography of Apiaceae subf. Saniculoideae Tribe Saniculeae: from South to North and South again.**

In: Taxon 57 (2), p. 365–382.

**KURZYNA-MŁYNIK, RENATA; OSKOLSKI, ALEXEI A.; DOWNIE, STEPHEN R.; KOPACZ, RAFAŁ; WOJEWÓDZKA, ANETA; SPALIK, KRYSZTOF (2008):**

**Phylogenetic Position of the Genus *Ferula* (Apiaceae) and its Placement in Tribe Scandiceae as inferred from nrDNA ITS Sequence Variation.**

In: Plant Systematics and Evolution 274 (1-2), p. 47–66. DOI: 10.1007/s00606-008-0022-2.

**LEE, CHANG-SHOOK; DOWNIE, STEPHEN R. (2006):**

**Phylogenetic Relationships within *Cicuta* (Apiaceae Tribe Oenantheae) inferred from nuclear rDNA ITS and cpDNA Sequence Data.**

In: Canadian Journal of Botany 84 (3), p. 453–468. DOI: 10.1139/B06-016.

**LIAO, CHEN-YANG; DOWNIE, STEPHEN R.; LI, QIN-QIN; YU, YANG; HE, XING-JIN; ZHOU, BO (2013):**

**New Insights into the Phylogeny of *Angelica* and its Allies (Apiaceae) with Emphasis on East Asian Species, inferred from nrDNA, cpDNA, and morphological Evidence.**

In: Systematic Botany 38 (1), p. 266–281. DOI: 10.1600/036364413X662060.

**LIAO, CHEN-YANG; DOWNIE, STEPHEN R.; YU, YANG; HE, XING-JIN (2012):**

**Historical Biogeography of the *Angelica* Group (Apiaceae Tribe Selineae) inferred from Analyses of nrDNA and cpDNA Sequences.**

In: Journal of Systematics and Evolution 50 (3), p. 206–217. DOI: 10.1111/j.1759-6831.2012.00182.x.

**LIU, MEI; PLUNKETT, GREGORY M.; LOWRY, PORTER PRESCOTT; VAN WYK, BEN-ERIK; TILNEY, PATRICIA M.; NICOLAS, ANTOINE N. (2016):**

**The phylogenetic Significance of Fruit and Trichome Structures in Apiaceae Subfamily Mackinlayoideae.**

In: Systematic Botany 41 (3), p. 685–699. DOI: 10.1600/036364416X692541.

**LOGACHEVA, MARIA D.; VALIEJO-ROMAN, CARMEN M.; DEGTJAREVA, GALINA V.; STRATTON, JENNY M.; DOWNIE, STEPHEN R.; SAMIGULLIN, TAHIR H.; PIMENOV, MICHAEL G. (2010):**

**A Comparison of nrDNA ITS and ETS loci for phylogenetic Inference in the Umbelliferae: an example from Tribe Tordylieae.**

In: Molecular Phylogenetics and Evolution 57 (1), p. 471–476. DOI: 10.1016/j.ympev.2010.06.001.

**LOGACHEVA, MARIA D.; VALIEJO-ROMAN, CARMEN M.; PIMENOV, MICHAEL G. (2008):**

**ITS Phylogeny of West Asian *Heracleum* Species and related Taxa of Umbelliferae–Tordylieae W.D.J.Koch, with Notes on Evolution of their psbA-trnH Sequences.**

In: Plant Systematics and Evolution 270 (3-4), p. 139–157. DOI: 10.1007/s00606-007-0619-x.

**LYSKOV, DMITRY; DEGTJAREVA, GALINA V.; SAMIGULLIN, TAHIR H.; PIMENOV, MICHAEL G. (2015):**

**Systematic Placement of the Turkish endemic Genus *Ekimia* (Apiaceae) based on morphological and molecular Data.**

In: Turkish Journal of Botany 39, p. 673–680. DOI: 10.3906/bot-1405-111.

**MAGEE, ANTHONY RICHARD; CALVIÑO, CAROLINA ISABEL; LIU, MEI; DOWNIE, STEPHEN R.; TILNEY, PATRICIA M. (2010):**



**New tribal Delimitations for the early diverging Lineages of Apiaceae Subfamily Apioideae.**

In: *Taxon* 59 (2), p. 567–580.

**MAGEE, ANTHONY RICHARD; CURTIS, ODETTE E.; VAN WYK, BEN-ERIK (2016):**

**A refined Circumscription of *Notobubon striatum* and the Resurrection of *Dregea collina* Ecklon & Zeyher (Apiaceae, Apioideae).**

In: *Phytotaxa* 266 (1), p. 27. DOI: 10.11646/phytotaxa.266.1.4.

**MAGEE, ANTHONY RICHARD; VAN WYK, BEN-ERIK; TILNEY, PATRICIA M. (2009):**

**A taxonomic Revision of the woody South African Genus *Notobubon* (Apiaceae: Apioideae).**

In: *Systematic Botany* 34 (1), p. 220–242. DOI: 10.1600/036364409787602294.

**MAGEE, ANTHONY RICHARD; VAN WYK, BEN-ERIK; TILNEY, PATRICIA M.; DOWNIE, STEPHEN R. (2009):**

**Generic Delimitations and Relationships of the Cape Genera *Capnophyllum*, *Dasispermum*, and *Sonderina*, the North African Genera *Kruberia* and *Stoibrax*, and a new monotypic Genus of the Subfamily Apioideae (Apiaceae).**

In: *Systematic Botany* 34 (3), p. 580–594. DOI: 10.1600/036364409789271218.

**MITCHELL, ANTHONY D.; WEBB, C. J.; WAGSTAFF, STEVEN J. (1998):**

**Phylogenetic Relationships of Species of *Gingidia* and related Genera (Apiaceae, Subfamily Apioideae).**

In: *New Zealand Journal of Botany* 36 (3), p. 417–424. DOI: 10.1080/0028825X.1998.9512580.

**NESOM, GUY L. (2012):**

***Villarrealia* (Apiaceae), a new Genus from Northern Mexico.**

In: *Phytoneuron* 85, p. 1–6.

**NEVES, SUSANA S.; WATSON, MARK F. (2004):**

**Phylogenetic Relationships in *Bupleurum* (Apiaceae) based on nuclear ribosomal DNA ITS Sequence Data.**

In: *Annals of Botany* 93 (4), p. 379–398. DOI: 10.1093/aob/mch052.

**NICOLAS, ANTOINE N.; PLUNKETT, GREGORY M. (2012):**

**Untangling generic limits in *Azorella*, *Laretia*, and *Mulinum* (Apiaceae: Azorelloideae): Insights from Phylogenetics and Biogeography.**

In: *Taxon* 61 (4), p. 826–840.

**PANAHI, MEHRNOUSH; BANASIAK, ŁUKASZ; PIWCZYŃSKI, MARCIN; PUCHAŁKA, RADOŚŁAW; OSKOLSKI, ALEXEI A.; SPALIK, KRYSZTOF (2015):**

**Phylogenetic Relationships among *Dorema*, *Ferula* and *Leutea* (Apiaceae: Scandiceae: Ferulinae) inferred from nrDNA ITS and cpDNA noncoding Sequences.**

In: *Taxon* 64 (4), p. 770–783. DOI: 10.12705/644.8.

**PETERSEN, GITTE; SEBERG, OLE; LARSEN, SIDSEL (2002):**

**The phylogenetic and taxonomic Position of *Lilaeopsis* (Apiaceae), with Notes on the applicability of ITS Sequence Data for phylogenetic reconstruction.**

In: *Australian Systematic Botany* 15 (2), p. 181. DOI: 10.1071/SB01007.

**PIMENOV, MICHAEL G.; DEGTJAREVA, GALINA V.; OSTROUMOVA, TATIANA A.; SAMIGULLIN, TAHIR H.; AVERYANOV, LEONID V. (2016):**

***Xyloselinum laoticum* (Umbelliferae), a new Species from Laos, and taxonomic Placement of the Genus in the light of nrDNA ITS Sequence Analysis.**

In: Phytotaxa 244 (3), p. 248. DOI: 10.11646/phytotaxa.244.3.2.

**PIMENOV, MICHAEL G.; KLJUYKOV, EUGENE V. (2005):**

**New West Himalayan Genus of the Umbelliferae, with Notes on Tibetan species, described in *Pachypleurum*.**

In: Feddes Repertorium 116 (1-2), p. 80–91. DOI: 10.1002/fedr.200411060.

**PIMENOV, MICHAEL G.; VALIEJO-ROMAN, CARMEN M.; TERENCEVA, ELENA I.; SAMIGULLIN, TAHIR H.; MOZAFFARIAN, VALIOLLAH (2007):**

**Enigmatic Genus *Hausknechtia* (Umbelliferae): systematic Relationships based on molecular and carpological Data.**

In: Nordic Journal of Botany 24 (5), p. 555–565.

**PIWCZYŃSKI, MARCIN; PUCHAŁKA, RADOSŁAW; SPALIK, KRYSZTOF (2015):**

**The infrageneric Taxonomy of *Chaerophyllum* (Apiaceae) revisited: new Evidence from nuclear ribosomal DNA ITS Sequences and Fruit Anatomy.**

In: Botanical Journal of the Linnean Society 178 (2), p. 298–313. DOI: 10.1111/boj.12282.

**PLUNKETT, GREGORY M.; NICOLAS, ANTOINE N. (2017):**

**Assessing *Azorella* (Apiaceae) and its allies: Phylogenetics and a new Classification.**

In: Brittonia 69 (1), p. 31–61. DOI: 10.1007/s12228-016-9446-0.

**RADFORD, ELIZABETH A.; WATSON, MARK F.; PRESTON, JILLIAN (2001):**

**Phylogenetic Relationships of Species of *Aciphylla* (Apiaceae, Subfamily Apioideae) and related Genera using molecular, morphological, and combined Data Sets.**

In: New Zealand Journal of Botany 39 (2), p. 183–208. DOI: 10.1080/0028825X.2001.9512730.

**SMITH, JAMES F.; MANSFIELD, DONALD H.; STEVENS, MCKAYLA; SOSA, EDGAR; FEIST, MARY ANN E.; DOWNIE, STEPHEN R. ET AL. (2018):**

**Try Tri again? Resolving Species boundaries in the *Lomatium triternatum* (Apiaceae) Complex.**

In: Journal of Systematics and Evolution 56 (3), p. 218–230. DOI: 10.1111/jse.12418.

**SPALIK, KRYSZTOF; DOWNIE, STEPHEN R. (2006):**

**The evolutionary History of *Sium* sensu lato (Apiaceae): Dispersal, Vicariance, and Domestication as inferred from ITS rDNA Phylogeny.**

In: American Journal of Botany 93 (5), p. 747–761. DOI: 10.3732/ajb.93.5.747.

**SPALIK, KRYSZTOF; DOWNIE, STEPHEN R.; WATSON, MARK F. (2009):**

**Generic Delimitations within the *Sium* alliance (Apiaceae Tribe Oenantheae) inferred from cpDNA *rps16-5'trnK* (Uuu) and nrDNA ITS Sequences.**

In: Taxon 58 (3), p. 735–748.

**SPALIK, KRYSZTOF; REDURON, JEAN-PIERRE; DOWNIE, STEPHEN R. (2004):**

**The phylogenetic Position of *Peucedanum* sensu lato and allied Genera and their Placement in Tribe Selineae (Apiaceae, Subfamily Apioideae).**

In: Plant Systematics and Evolution 243 (3-4), p. 189–210. DOI: 10.1007/s00606-003-0066-2.

**SPALIK, KRYSZTOF; WOJEWÓDZKA, ANETA; DOWNIE, STEPHEN R. (2001):**

**The Evolution of Fruit in Scandiceae Subtribe Scandicinae (Apiaceae).**

In: Canadian Journal of Botany 79 (11), p. 1358–1374. DOI: 10.1139/cjb-79-11-1358.

**SUN, FENG-JIE; DOWNIE, STEPHEN R.; HARTMAN, RONALD L. (2004):**

**An ITS-based phylogenetic Analysis of the perennial, endemic Apiaceae Subfamily Apioideae of Western North America.**

In: Systematic Botany 29 (2), p. 419–431. DOI: 10.1600/036364404774195601.

**SUN, NA; HE, XING-JIN; ZHOU, SONG-DONG (2008):**

**Morphological cladistic Analysis of *Ligusticum* (Umbelliferae) in China.**

In: Nordic Journal of Botany 26 (1-2), p. 118–128. DOI: 10.1111/j.0107-055X.2008.00144.x.

**TERENTIEVA, ELENA I.; VALIEJO-ROMAN, CARMEN M.; SAMIGULLIN, TAHIR H.; PIMENOV, MICHAEL G.; TILNEY, PATRICIA M. (2015):**

**Molecular phylogenetic and morphological Analyses of the traditional Tribe *Coriandreae* (Umbelliferae-Apioideae).**

In: Phytotaxa 195 (4), p. 251. DOI: 10.11646/phytotaxa.195.4.1.

**VALIEJO-ROMAN, CARMEN M.; SHNEYER, V. S.; SAMIGULLIN, TAHIR H.; TERENTIEVA, ELENA I.; PIMENOV, MICHAEL G. (2006):**

**An attempt to clarify taxonomic Relationships in ``Verwandtschaftskreis der Gattung *Ligusticum*'' (Umbelliferae-Apioideae) by molecular Analysis.**

In: Plant Systematics and Evolution 257 (1-2), p. 25–43. DOI: 10.1007/s00606-005-0383-8.

**VALIEJO-ROMAN, CARMEN M.; TERENTIEVA, ELENA I.; SAMIGULLIN, TAHIR H.; PIMENOV, MICHAEL G.; GHAHREMANINEJAD, FARROKH; MOZAFFARIAN, V. (2006):**

**Molecular Sata (nrITS-Sequencing) reveal Relationships among Iranian endemic Taxa of the Umbelliferae.**

In: Feddes Repertorium 117 (5-6), p. 367–388. DOI: 10.1002/fedr.200611106.

**VALIEJO-ROMAN, CARMEN M.; TERENTIEVA, ELENA I.; SAMIGULLIN, TAHIR H.; PIMENOV, MICHAEL G. (2002):**

**NrDNA ITS Sequences and affinities of Sino-Himalayan Apioideae (Umbelliferae).**

In: Taxon 51, p. 685–701.

**WANG, CHANG-BAO; MA, XIANG-GUANG; HE, XING-JIN (2011):**

**A taxonomic re-assessment in the Chinese *Bupleurum* (Apiaceae): Insights from Morphology, nuclear ribosomal internal transcribed Spacer, and Chloroplast (trnH-psbA, matK) Sequences.**

In: Journal of Systematics and Evolution 49 (6), p. 558–589. DOI: 10.1111/j.1759-6831.2011.00157.x.

**WANG, QI-ZHI; HE, XING-JIN; ZHOU, SONG-DONG; WU, YUN-KE; YU, YANG; PANG, YUN-LI (2008):**

**Phylogenetic Inference of the Genus *Bupleurum* (Apiaceae) in Hengduan Mountains based on Chromosome counts and nuclear ribosomal DNA ITS Sequences.**

In: Journal of Systematics and Evolution 46 (2), p. 142–154.

**WANG, ZHI-XIN; DOWNIE, STEPHEN R.; TAN, JIN-BO; LIAO, CHEN-YANG; YU, YANG; HE, XING-JIN (2014):**

**Molecular Phylogenetics of *Pimpinella* and allied Genera (Apiaceae), with Emphasis on Chinese native species, inferred from nrDNA ITS and cpDNA Intron Sequence Data.**

In: Nordic Journal of Botany 32 (5), p. 642–657. DOI: 10.1111/j.1756-1051.2013.00343.x.

**WEITZEL, CORINNA; RØNSTED, NINA; SPALIK, KRYSZTOF; SIMONSEN, HENRIK TOFT (2014):**

**Resurrecting deadly carrots: towards a Revision of *Thapsia* (Apiaceae) based on phylogenetic Analysis of nrITS Sequences and chemical profiles.**

In: Botanical Journal of the Linnean Society 174 (4), p. 620–636. DOI: 10.1111/boj.12144.

**WINTER, PIETER J.D.; MAGEE, ANTHONY RICHARD; PHEPHU, NONKULULO; TILNEY, PATRICIA M.; DOWNIE, STEPHEN R.; VAN WYK, BEN-ERIK (2008):**

**A new generic Classification for African peucedanoid Species (Apiaceae).**

In: Taxon 57 (2), p. 347–364.

**YI, TING-SHUANG; JIN, GUI-HUA; WEN, JUN (2015):**

**Chloroplast capture and intra- and inter-continental biogeographic Diversification in the Asian - New World disjunct plant Genus *Osmorhiza* (Apiaceae).**

In: Molecular Phylogenetics and Evolution 85, p. 10–21. DOI: 10.1016/j.ympev.2014.09.028.

**YU, YANG; DOWNIE, STEPHEN R.; HE, XING-JIN; DENG, XIANLAN; YAN, LING (2011):**

**Phylogeny and Biogeography of Chinese *Heracleum* (Apiaceae Tribe Tordylieae) with comments on their Fruit Morphology.**

In: Plant Systematics and Evolution 296 (3-4), p. 179–203. DOI: 10.1007/s00606-011-0486-3.

**YUAN, QING-JUN; ZHANG, BIN; JIANG, DAN; ZHANG, WEN-JING; LIN, TSAI-YUN; WANG, NIAN-HE ET AL. (2015):**

**Identification of Species and Materia Medica within *Angelica* L. (Umbelliferae) based on Phylogeny inferred from DNA barcodes.**

In: molecular Ecology Resources 15 (2), p. 358–371. DOI: 10.1111/1755-0998.12296.

**ZAKHAROVA, EKATERINA A.; DEGTJAREVA, GALINA V.; PIMENOV, MICHAEL G. (2012):**

**Redefined generic Limits of *Carum* (Umbelliferae, Apioideae) and new systematic Placement of some of its Taxa.**

In: Willdenowia 42 (2), p. 149–168. DOI: 10.3372/wi.42.42201.

**ZAKHAROVA, EKATERINA A.; KLJUYKOV, EUGENE V.; DEGTJAREVA, GALINA V.; SAMIGULLIN, TAHIR H.; UKRAINSKAYA, ULIANA A.; DOWNIE, STEPHEN R. (2016):**

**A taxonomic Study of the Genus *Hellenocarum* H.Wolff (Umbelliferae-Apioideae) based on Morphology, Fruit Anatomy, and molecular Data.**

In: Turkish Journal of Botany 40, p. 176–193. DOI: 10.3906/bot-1504-40.

**ZHOU, JING; GONG, XUN; DOWNIE, STEPHEN R.; PENG, HUA (2009):**

**Towards a more robust molecular Phylogeny of Chinese Apiaceae Subfamily Apioideae: additional Evidence from nrDNA ITS and cpDNA Intron (*rpl16* and *rps16*) Sequences.**

In: Molecular Phylogenetics and Evolution 53 (1), p. 56–68. DOI: 10.1016/j.ympev.2009.05.029.

**ZHOU, JING; PENG, HUA; DOWNIE, STEPHEN R.; LIU, ZHEN-WEN; GONG, XUN (2008):**

**A molecular Phylogeny of Chinese Apiaceae Subfamily Apioideae inferred from nuclear ribosomal DNA Internal Transcribed Spacer Sequences.**

In: Taxon 57 (2), p. 402–416.

## Apiales

**CHANDLER, GREGORY T.; PLUNKETT, GREGORY M. (2004):**

**Evolution in Apiales: nuclear and Chloroplast Markers together in (almost) perfect Harmony.**

In: Botanical Journal of the Linnean Society 144 (2), p. 123–147. DOI: 10.1111/j.1095-8339.2003.00247.x.

**DOWNIE, STEPHEN R.; KATZ-DOWNIE, DEBORAH S.; WATSON, MARK F. (2000):**

**A Phylogeny of the flowering plant Family Apiaceae based on Chloroplast DNA *rpl16* and *rpoC1* Intron Sequences: towards a suprageneric Classification of Subfamily Apioideae.**

In: American Journal of Botany 87 (2), p. 273–292. DOI: 10.2307/2656915.

**PLUNKETT, GREGORY M.; CHANDLER, GREGORY T.; LOWRY, PORTER PRESCOTT II.; PINNEY, STEVEN M.; SPRENKLE, T. P. (2004):**

**Recent Advances in Understanding Apiales and a revised Classification.**

In: South African Journal of Botany 70 (3), p. 371–381.

**PLUNKETT, GREGORY M.; LOWRY, PORTER PRESCOTT (2001):**

**Relationships among "ancient araliads" and their Significance for the Systematics of Apiales.**

In: *Molecular Phylogenetics and Evolution* 19 (2), p. 259–276. DOI: 10.1006/mpev.2000.0920.

**Apocynaceae**

**ALVARADO-CÁRDENAS, LEONARDO O.; OCHOTERENA, HELGA (2007):**

**A phylogenetic Analysis of the *Cascabela–Thevetia* Species Complex (Plumerieae, Apocynaceae) based on Morphology.**

In: *Annals of the Missouri Botanical Garden* 94 (2), p. 298–323. DOI: 10.3417/0026-6493(2007)94[298:APAOTC]2.0.CO;2.

**BRUYNS, PETER V. (2002):**

**Monograph of *Orbea* and *Ballyanthus* (Apocynaceae-Asclepiadoideae-Ceropegieae).**

In: *Systematic Botany Monographs* 63, p. 1–196.

**BRUYNS, PETER V.; FARSI, AMINA AL; TERRY HEDDERSON, A. (2010):**

**Phylogenetic Relationships of *Caralluma* R.Br. (Apocynaceae).**

In: *Taxon* 59 (4), p. 1031–1043.

**BRUYNS, PETER V.; KLAKE, CORNELIA; HANÁČEK, PAVEL (2014):**

**Evolution of the stapeliads (Apocynaceae-Asclepiadoideae) - repeated major Radiation across Africa in an Old World Group.**

In: *Molecular Phylogenetics and Evolution* 77, p. 251–263. DOI: 10.1016/j.ympev.2014.03.022.

**BRUYNS, PETER V.; KLAKE, CORNELIA; HANÁČEK, PAVEL (2015):**

**Recent Radiation of *Brachystelma* and *Ceropegia* (Apocynaceae) across the Old World against a Background of climatic Change.**

In: *Molecular Phylogenetics and Evolution* 90, p. 49–66. DOI: 10.1016/j.ympev.2015.04.015.

**BRUYNS, PETER V.; KLAKE, CORNELIA; HANÁČEK, PAVEL (2017):**

**A revised, phylogenetically-based Concept of *Ceropegia* (Apocynaceae).**

In: *South African Journal of Botany* 112, p. 399–436. DOI: 10.1016/j.sajb.2017.06.021.

**BRUYNS, PETER V.; NOWELL, TRACEY L.; HEDDERSON, TERRY A. J. (2005):**

**A Revision and phylogenetic Analysis of *Stapeliopsis* (Apocynaceae).**

In: *Botanical Journal of the Linnean Society* 148, p. 125–155.

**ENDRESS, MARY E.; LIEDE-SCHUMANN, SIGRID; MEVE, ULRICH (2014):**

**An updated Classification for Apocynaceae.**

In: *Phytotaxa* 159 (3), p. 175. DOI: 10.11646/phytotaxa.159.3.2.

**ENDRESS, MARY E.; VAN DER HAM, RAYMOND W. J. M.; NILSSON, SIWERT; CIVEYREL, LAURE; CHASE, MARK W.; SENNBLAD, BENGT ET AL. (2007):**

**A phylogenetic Analysis of Alyxieae (Apocynaceae) based on Rbc L, matK, Trn L Intron, TrnL-f Spacer Sequences, and morphological Characters.**

In: *Annals of the Missouri Botanical Garden* 94 (1), p. 1–35. DOI: 10.3417/0026-6493(2007)94[1:APA0AA]2.0.CO;2.

**FISHBEIN, MARK; CHUBA, DAVID; ELLISON, CHRIS; MASON-GAMER, ROBERTA J.; LYNCH, STEVEN P. (2011):**

**Phylogenetic Relationships of *Asclepias* (Apocynaceae) inferred from non-coding Chloroplast DNA Sequences.**

In: *Systematic Botany* 36 (4), p. 1008–1023. DOI: 10.1600/036364411X605010.

**GILBERT, MICHAEL G. (2015):**

***Echidnopsis thulinii* sp. nov. (Apocynaceae-Asclepiadoideae) with a Review of the infrageneric Classification of the Genus.**

In: Nordic Journal of Botany 33 (6), p. 646–654. DOI: 10.1111/njb.00775.

**GOYDER, DAVID J. (2016):**

**The correct name for *Mateleia chacoensis* Goyder (Apocynaceae: Asclepiadoideae).**

In: Kew Bulletin 71 (2), p. 232. DOI: 10.1007/S12225-016-9631-Z.

**GOYDER, DAVID J.; NICHOLAS, ASHLEY; LIEDE-SCHUMANN, SIGRID (2007):**

**Phylogenetic Relationships in Subtribe Asclepiadinae (Apocynaceae: Asclepiadoideae) 1.**

In: Annals of the Missouri Botanical Garden 94 (2), p. 423–434. DOI: 10.3417/0026-6493(2007)94[423:PRISAA]2.0.CO;2.

**HECHEM, VIVIANA; CALVIÑO, CAROLINA ISABEL; EZCURRA, CECILIA (2011):**

**Molecular Phylogeny of *Diplolepis* (Apocynaceae-Asclepiadoideae) and allied Genera, and taxonomic Implications.**

In: Taxon 60 (3), p. 638–648.

**IONTA, GRETCHEN M.; JUDD, WALTER P. (2007):**

**Phylogenetic Relationships in Periplocoideae (Apocynaceae S.I.) and Insights into the Origin of Pollinia.**

In: Annals of the Missouri Botanical Garden 94 (2), p. 360–375. DOI: 10.3417/0026-6493(2007)94[360:PRIPAS]2.0.CO;2.

**JOUBERT, LIZE; KLAK, CORNELIA; VENTER, ANDOR M.; VENTER, HENDRIK J.T.; BRUYNS, PETER V. (2016):**

**A widespread Radiation in the Periplocoideae (Apocynaceae): the case of *Cryptolepis*.**

In: Taxon 65 (3), p. 487–501. DOI: 10.12705/653.4.

**KHANUM, RIZWANA; SURVESWARAN, SIDDHARTHAN; MEVE, ULRICH; LIEDE-SCHUMANN, SIGRID (2016):**

***Cynanchum* (Apocynaceae: Asclepiadoideae): A Pantropical Asclepiadoid Genus revisited.**

In: Taxon 65 (3), p. 467–486. DOI: 10.12705/653.3.

**KONNO, TATIANA U. P.; RAPINI, ALESSANDRO; GOYDER, DAVID J.; CHASE, MARK W. (2006):**

**The new Genus *Minaria* (Asclepiadoideae, Apocynaceae).**

In: Taxon 55 (2), p. 421–430.

**KRINGS, ALEXANDER; THOMAS, DAVID T.; XIANG, QIU-YUN (2008):**

**On the Generic Circumscription of *Gonolobus* (Apocynaceae, Asclepiadoideae): Evidence from Molecules and Morphology.**

In: Systematic Botany 33 (2), p. 403–415.

**KUNZE, HENNING; WANNTORP, LIVIA (2008):**

**The Gynostegium of *Hoya spartioides* (Apocynaceae – Asclepiadoideae): A striking Case of Incongruence between molecular and phenotypic Evolution.**

In: Organisms Diversity and Evolution 8 (5), p. 346–357. DOI: 10.1016/j.ode.2008.06.002.

**LAHAYE, RENAUD; CIVEYREL, LAURE; SPECK, THOMAS; ROWE, NICK P. (2005):**

**Evolution of Shrub-like Growth Forms in the Lianoid Subfamily Secamonoideae (Apocynaceae S.I.) of Madagascar: Phylogeny, Biomechanics, and Development.**

In: American Journal of Botany 92 (8), p. 1381–1396.

**LAHAYE, RENAUD; KLACKENBERG, JENS; KÄLLERSJÖ, MARI; VAN CAMPO, ELISE; CIVEYREL, LAURE (2007):**

**Phylogenetic Relationships between derived Apocynaceae s.l. and within Secamonoideae based on Chloroplast Sequences.**

In: Annals of the Missouri Botanical Garden 94 (2), p. 376–391. DOI: 10.3417/0026-6493(2007)94[376:PRBDAS]2.0.CO;2.

LIEDE, SIGRID (2001):

**Subtribe Astephaninae (Apocynaceae-Asclepiadoideae) Reconsidered: new Evidence based on cpDNA Spacers.**

In: Annals of the Missouri Botanical Garden 88 (4), p. 657–668.

LIEDE, SIGRID; KUNZE, HENNING (2002):

***Cynanchum* and the Cynanchinae (Apocynaceae? Asclepiadoideae): a molecular, anatomical and latex triterpenoid study.**

In: Organisms Diversity and Evolution 2 (3), p. 239–269. DOI: 10.1078/1439-6092-00045.

LIEDE, SIGRID; MEVE, ULRICH; TÄUBER, ANGELIKA (2002):

**What is the Subtribe Glossonematinae (Apocynaceae: Asclepiadoideae)? A phylogenetic Study based on cpDNA spacer.**

In: Botanical Journal of the Linnean Society 139, p. 145–158.

LIEDE, SIGRID; TÄUBER, ANGELIKA (2000):

***Sarcostemma* R.Br. (Apocynaceae - Asclepiadoideae) - a controversial generic Circumscription reconsidered: Evidence from trnL-F spacers.**

In: Plant Systematics and Evolution 225, p. 133–140.

LIEDE-SCHUMANN, SIGRID; DÖTTERL, STEFAN; GEBAUER, MARGIT; MEVE, ULRICH (2013):

**A Rapid Study of the *Sarcostemma* Group of *Cynanchum* (Apocynaceae-Asclepiadoideae-Asclepiadeae).**

In: Organisms Diversity and Evolution 13 (1), p. 15–31. DOI: 10.1007/s13127-012-0099-x.

LIEDE-SCHUMANN, SIGRID; KHANUM, RIZWANA; MUMTAZ, ABDUL SAMAD; GHERGHEL, IULIAN; PAHLEVANI, AMIRHOSSEIN (2016):

**Going west - A subtropical Lineage (*Vincetoxicum*, Apocynaceae: Asclepiadoideae) expanding into Europe.**

In: Molecular Phylogenetics and Evolution 94, p. 436–446. DOI: 10.1016/j.ympev.2015.09.021.

LIEDE-SCHUMANN, SIGRID; KONG, HANGHUI; MEVE, ULRICH; THIV, MIKE (2012):

***Vincetoxicum* and *Tylophora* (Apocynaceae: Asclepiadoideae: Asclepiadeae). Two sides of the same medal: Independent Shifts from tropical to temperate Habitats.**

In: Taxon 61 (4), p. 803–825.

LIEDE-SCHUMANN, SIGRID; MEVE, ULRICH (2013):

**The Orthosiinae revisited (Apocynaceae, Asclepiadoideae, Asclepiadeae) 1.**

In: Annals of the Missouri Botanical Garden 99 (1), p. 44–81. DOI: 10.3417/2010130.

LIEDE-SCHUMANN, SIGRID; RAPINI, ALESSANDRO; GOYDER, DAVID J.; CHASE, MARK W. (2005):

**Phylogenetics of the New World Subtribes of Asclepiadeae (Apocynaceae - Asclepiadoideae): Metastelmatinae, Oxypetalinae, and Gonolobinae.**

In: Systematic Botany 30 (1), p. 184–195. DOI: 10.1600/0363644053661832.

LIVSHULTZ, TATYANA (2010):

**The phylogenetic Position of milkweeds (Apocynaceae subfamilies Secamonoideae and Asclepiadoideae): Evidence from the Nucleus and Chloroplast.**

In: Taxon 59 (4), p. 1016–1030.

- MANGELSDORFF, RALPH D.; MEVE, ULRICH; LIEDE-SCHUMANN, SIGRID (2016):**  
**Phylogeny and Circumscription of Antillean *Anemotrochus*, gen. nov., and *Tylodontia* (Apocynaceae : Asclepiadoideae : Gonolobinae ).**  
In: Willdenowia 46 (3), p. 443–474. DOI: 10.3372/wi.46.46311.
- MCDONNELL, ANGELA; FISHBEIN, MARK (2016):**  
***Polystemma canisferum* (Apocynaceae, Asclepiadoideae): a distinctive new gonoloboid milkweed Vine from Sonora, Mexico.**  
In: Phytotaxa 246 (1), p. 78. DOI: 10.11646/phytotaxa.246.1.6.
- MEVE, ULRICH; LIEDE, SIGRID (2001):**  
**Inclusion of *Tenaris* and *Macropetalum* in *Brachystelma* (Apocynaceae - Asclepioideae - Cecropegieae) inferres from non-cosing nuclear and Chloroplast DNA Sequences.**  
In: Plant Systematics and Evolution 228, p. 89–105.
- MEVE, ULRICH; LIEDE, SIGRID (2002):**  
**A molecular Phylogeny and generic Rearrangement of the stapelioid Ceropegieae (Apocynaceae-Asclepiadoideae).**  
In: Plant Systematics and Evolution 234 (1), p. 171–209. DOI: 10.1007/s00606-002-0220-2.
- MEVE, ULRICH; LIEDE, SIGRID (2004):**  
**Generic Delimitations in tuberous Periplocoideae (Apocynaceae) from Africa and Madagascar.**  
In: Annals of Botany 93 (4), p. 407–414. DOI: 10.1093/aob/mch057.
- MEVE, ULRICH; LIEDE-SCHUMANN, SIGRID (2007):**  
***Ceropegia* (Apocyneae, Ceropegieae, Stapeliinae): Paraphyletic but still Taxonomically sound.**  
In: Annals of the Missouri Botanical Garden 94 (2), p. 392–406. DOI: 10.3417/0026-6493(2007)94[392:CACSPB]2.0.CO;2.
- MEVE, ULRICH; LIEDE-SCHUMANN, SIGRID (2015):**  
**Taxonomy of the Andean Genus *Pentacyphus* (Apocynaceae: Asclepiadeae–Pentacyphinae).**  
In: Plant Systematics and Evolution 301 (3), p. 997–1004. DOI: 10.1007/s00606-014-1130-9.
- MORALES, J. FRANCISCO; ENDRESS, MARY E.; LIEDE-SCHUMANN, SIGRID (2017):**  
**Sex, drugs and pupusas: Disentangling Relationships in Echiteae (Apocynaceae).**  
In: Taxon 66 (3), p. 623–644. DOI: 10.12705/663.7.
- MORILLO, GILBERTO (2012):**  
**Aportes al Conocimiento de las Gonolobinae (Apocynaceae - Asclepiadoideae).**  
In: Pittieria 36, p. 13–57.
- NAZAR, NAZIA; GOYDER, DAVID J.; CLARKSON, JAMES J.; MAHMOOD, TARIQ; CHASE, MARK W. (2013):**  
**The Taxonomy and Systematics of Apocynaceae: where we stand in 2012.**  
In: Botanical Journal of the Linnean Society 171, p. 482–490.
- PEREIRA, FONTELLA J.; SANTOS, R. G. P.; GOES, M. B. DE; MORAL, P. A. CÁCERES (2014):**  
**Notas Taxonómicas sobre *Hemipogon* subgen. *Astephanopsis*, y Descripción de un nuevo Género (Apocynaceae, Asclepiadoideae, Asclepiadeae, Metastelmatinae).**  
In: Bonplandia 23 (1), p. 25–31.
- RAPINI, ALESSANDRO (2012):**



**Taxonomy “under construction”: advances in the Systematics of Apocynaceae, with Emphasis on the Brazilian Asclepiadoideae.**

In: *Rodriguésia* 63 (1), p. 75–88.

**RAPINI, ALESSANDRO; CHASE, MARK W.; GOYDER, DAVID J.; GRIFFITHS, JAYNE (2003):**

**Asclepiadeae Classification: evaluating the phylogenetic Relationships of New World Asclepiadoideae (Apocynaceae).**

In: *Taxon* 52, p. 33–50.

**RAPINI, ALESSANDRO; CHASE, MARK W.; KONNO, TATIANA U. P. (2006):**

**Phylogenetics of South American Asclepiadoideae (Apocynaceae).**

In: *Taxon* 55 (1), p. 119–124.

**RIBEIRO, PATRÍCIA LUZ; RAPINI, ALESSANDRO; SILVA, UIARA CATHARINA SOARES E.; VAN DEN BERG, CÁSSIO (2012):**

**Using multiple analytical methods to improve phylogenetic hypotheses in *Minaria* (Apocynaceae).**

In: *Molecular Phylogenetics and Evolution* 65 (3), p. 915–925. DOI: 10.1016/j.ympev.2012.08.019.

**RODDA, MICHELE (2016):**

**Checklist and typification of *Heterostemma* (Apocynaceae, Asclepiadoideae, Ceropogonieae).**

In: *Phytotaxa* 263 (1), p. 1. DOI: 10.11646/phytotaxa.263.1.1.

**SENNBLAD, BENGT; BREMER, BIRGITTA (2002):**

**Classification of Apocynaceae s.l. according to a new Approach combining Linnaean and phylogenetic Taxonomy.**

In: *Systematic Biology* 51 (3), p. 389–409. DOI: 10.1080/10635150290069869.

**SIMÕES, ANDRÉ OLMOS; ENDRESS, MARY E.; CONTI, ELENA (2010):**

**Systematics and Character Evolution of Tabernaemontaneae (Apocynaceae, Rauvolfioideae) based on molecular and morphological Evidence.**

In: *Taxon* 59 (3), p. 772–790.

**SIMÕES, ANDRÉ OLMOS; ENDRESS, MARY E.; VAN DER NIET, TIMOTHEÛS; KINOSHITA, LUIZA S.; CONTI, ELENA (2006):**

**Is *Mandevilla* (Apocynaceae, Mesechiteae) monophyletic? Evidence from five Plastid DNA Loci and Morphology.**

In: *Annals of the Missouri Botanical Garden* 93 (4), p. 565–591. DOI: 10.3417/0026-6493(2006)93[565:IMAMME]2.0.CO;2.

**SIMÕES, ANDRÉ OLMOS; KINOSHITA, LUIZA S.; KOCH, INGRID; SILVA, MÁRCIO JOSÉ; ENDRESS, MARY E. (2016):**

**Systematics and Character Evolution of Vinceae (Apocynaceae).**

In: *Taxon* 65 (1), p. 99–122. DOI: 10.12705/651.7.

**SIMÕES, ANDRÉ OLMOS; LIVSHULTZ, TATYANA; CONTI, ELENA; ENDRESS, MARY E. (2007):**

**Phylogeny and Systematics of the Rauvolfioideae (Apocynaceae) based on molecular and morphological Evidence.**

In: *Annals of the Missouri Botanical Garden* 94 (2), p. 268–297. DOI: 10.3417/0026-6493(2007)94[268:PASOTR]2.0.CO;2.

**SIMÕES, ANDRÉ; ENDRESS, MARY E.; VAN DER NIET, TIMOTHEÛS; KINOSHITA, LUIZA S.; CONTI, ELENA (2004):**

**Tribal and Intergeneric Relationships of Mesechiteae (Apocynoideae, Apocynaceae): Evidence from three noncoding Plastid DNA Regions and Morphology.**

In: *American Journal of Botany* 91 (9), p. 1409–1418.

- STRAUB, SHANNON C. K.; MOORE, MICHAEL J.; SOLTIS, PAMELA S.; SOLTIS, DOUGLAS E.; LISTON, AARON; LIVSHULTZ, TATYANA (2014):**  
**Phylogenetic Signal Detection from an ancient rapid Radiation: Effects of noise Reduction, long-branch Attraction, and model Selection in Crown Clade Apocynaceae.**  
In: *Molecular Phylogenetics and Evolution* 80, p. 169–185. DOI: 10.1016/j.ympev.2014.07.020.
- SURVESWARAN, SIDDHARTHAN; KAMBLE, MAYUR Y.; YADAV, SHRIRANG RAMCHANDRA; SUN, MEI (2009):**  
**Molecular Phylogeny of *Ceropegia* (Asclepiadoideae, Apocynaceae) from Indian Western Ghats.**  
In: *Plant Systematics and Evolution* 281 (1-4), p. 51–63. DOI: 10.1007/s00606-009-0182-8.
- SURVESWARAN, SIDDHARTHAN; SUN, MEI; GRIMM, GUIDO W.; LIEDE-SCHUMANN, SIGRID (2014):**  
**On the systematic Position of some Asian enigmatic Genera of Asclepiadoideae (Apocynaceae).**  
In: *Botanical Journal of the Linnean Society* 174, p. 601–619.
- THIV, MIKE; MEVE, ULRICH (2007):**  
**A phylogenetic Study of *Echidnopsis* Hook. f. (Apocynaceae-Asclepiadoideae) - taxonomic Implications and the Colonization of the Socotran Archipelago.**  
In: *Plant Systematics and Evolution* 265 (1-2), p. 71–86. DOI: 10.1007/s00606-007-0516-3.
- TURNER, IAN M. (2016):**  
**Two new Combinations in tropical Apocynaceae.**  
In: *Webbia* 71 (2), p. 227–228. DOI: 10.1080/00837792.2016.1186336.
- UEMACHI, AZUSA; SHIMOMURA, TAKASHI (2013):**  
**Molecular Phylogeny of *Tachelospermum* (Apocynaceae) in Japan based on cpDNA and nrDNA nucleotide Sequences.**  
In: *Acta Phytotaxonomica Geobotanica* 64 (1), p. 1–13.
- UNGARETTI, TATIANA; KONNO, PALEO; PEREIRA, JORGE FONTELLA (2004):**  
**Some Nomenclatural and taxonomic Notes on Brazilian *Ditassa* (Apocynaceae: Asclepiadoideae).**  
In: *Kew Bulletin* 59 (2), p. 297–300.
- VENTER, HENDRIK J.T. (2008):**  
**Taxonomy of *Chlorocyathus* (Apocynaceae: Periplocoideae).**  
In: *South African Journal of Botany* 74 (2), p. 288–294. DOI: 10.1016/j.sajb.2007.12.004.
- WANNTORP, LIVIA (2007):**  
**Pollinaria of *Hoya* (Marsdenieae, Apocynaceae) - shedding light on molecular Phylogenetics.**  
In: *Taxon* 56 (2), p. 465–478.
- WANNTORP, LIVIA (2009):**  
**Phylogenetic Systematics of *Hoya* (Apocynaceae).**  
In: *Blumea* 54 (1), p. 228–232. DOI: 10.3767/000651909X476201.
- WANNTORP, LIVIA; FORSTER, PAUL I. (2007):**  
**Phylogenetic Relationships between *Hoya* and the monotypic Genera *Madangia*, *Absolmsia*, and *Micholitzia* (Apocynaceae, Marsdenieae): Insights from Flower Morphology.**  
In: *Annals of the Missouri Botanical Garden* 94 (1), p. 36–55. DOI: 10.3417/0026-6493(2007)94[36:PRBHAT]2.0.CO;2.

WANNTORP, LIVIA; GOTTHARDT, KATHERINA; MÜLLNER, ALEXANDRA N. (2011):

**Revisiting the wax plants (*Hoya*, Marsdenieae, Apocynaceae): phylogenetic Tree using the matK Gene and psbA-trnH intergenic Spacer.**

In: Taxon 60 (1), p. 4–14.

WANNTORP, LIVIA; KOCYAN, ALEXANDER; RENNER, SUSANNE P. (2006):

**Wax plants disentangled: a Phylogeny of *Hoya* (Marsdenieae, Apocynaceae) inferred from nuclear and Chloroplast DNA Sequences.**

In: Molecular Phylogenetics and Evolution 39 (3), p. 722–733. DOI: 10.1016/j.ympev.2006.01.022.

WANNTORP, LIVIA; KOCYAN, ALEXANDER; VAN DONKELAAR, RUURD; RENNER, SUSANNE P. (2006):

**Towards a Monophyletic *Hoya* (Marsdenieae, Apocynaceae): Inferences from the Chloroplast trnL Region and the rbcL-atpB Spacer.**

In: Systematic Botany 31 (3), p. 586–596.

WANNTORP, LIVIA; KUNZE, HENNING (2009):

**Identifying Synapomorphies in the Flowers of *Hoya* and *Dischidia* -Toward phylogenetic Understanding.**

In: International Journal of Plant Sciences 170 (3), p. 331–342. DOI: 10.1086/596329.

WEIDE, JASMIJN C. VAN DER; HAM, RAYMOND W.J.M. VAN DER (2012):

**Pollen Morphology and Phylogeny of the Tribe Tabernaemontaneae (Apocynaceae, Subfamily Rauvolfioideae).**

In: Taxon 61 (1), p. 131–145.

YAMASHIRO, TADASHI; FUKUDA, TATSUYA; YOKOYAMA, JUN U.N.; MAKI, MASAYUKI (2004):

**Molecular Phylogeny of *Vincetoxicum* (Apocynaceae-Asclepiadoideae) based on the nucleotide Sequences of cpDNA and nrDNA.**

In: Molecular Phylogenetics and Evolution 31 (2), p. 689–700. DOI: 10.1016/j.ympev.2003.08.016.

## Apodanthaceae

BELLOT, SIDONIE; RENNER, SUSANNE P. (2014):

**Exploring new dating Approaches for Parasites: the worldwide Apodanthaceae (Cucurbitales) as an example.**

In: Molecular Phylogenetics and Evolution 80, p. 1–10. DOI: 10.1016/j.ympev.2014.07.005.

BLARER, ALBERT; NICKRENT, DANIEL LEE; ENDRESS, PETER K. (2004):

**Comparative Floral Structure and Systematics in Apodanthaceae (Rafflesiales).**

In: Plant Systematics and Evolution 245 (1-2), p. 119–142. DOI: 10.1007/s00606-003-0090-2.

FILIPOWICZ, NATALIA; RENNER, SUSANNE P. (2010):

**The worldwide holoparasitic Apodanthaceae confidently placed in the Cucurbitales by nuclear and mitochondrial Gene Trees.**

In: BMC Evolutionary Biology 10, p. 219. DOI: 10.1186/1471-2148-10-219.

## Aponogetonaceae

CHEN, LING-YUN; GRIMM, GUIDO W.; WANG, QING-FENG; RENNER, SUSANNE P. (2015):

**A Phylogeny and biogeographic Analysis for the Cape-Pondweed Family Aponogetonaceae (Alismatales).**

In: Molecular Phylogenetics and Evolution 82 Pt A, p. 111–117. DOI: 10.1016/j.ympev.2014.10.007.

LES, DONALD H.; MOODY, MICHAEL L.; JACOBS, SURREY W.L. (2005):

**Phylogeny and Systematics of *Aponogeton* (Aponogetonaceae): the Australian Species.**

In: Systematic Botany 30 (3), p. 503–519. DOI: 10.1600/0363644054782215.

## Aquifoliaceae

GOTTLIEB, ALEXANDRA M.; GIBERTI, GUSTAVO C.; POGGIO, LIDIA (2005):

**Molecular Analyses of the Genus *Ilex* (Aquifoliaceae) in Southern South America, Evidence from AFLP and ITS Sequence Data.**

In: American Journal of Botany 92 (2), p. 352–369.

HONG, DE-YUAN (2015):

**A Taxonomical Revision of *Ilex* (Aquifoliaceae) in the Pan-Himalaya and unraveling its Distribution Patterns.**

In: Phytotaxa 230 (2), p. 151. DOI: 10.11646/phytotaxa.230.2.3.

MANEN, JEAN-FRANÇOIS; BARRIERA, GABRIELLE; LOIZEAU, PIERRE-ANDRÉ; NACIRI, YAMAMA (2010):

**The History of extant *Ilex* Species (Aquifoliaceae): Evidence of Hybridization within a Miocene Radiation.**

In: Molecular Phylogenetics and Evolution 57 (3), p. 961–977. DOI: 10.1016/j.ympev.2010.09.006.

MANEN, JEAN-FRANÇOIS; BOULTER, M. C.; NACIRI-GRAVEN, Y. (2002):

**The complex History of the Genus *Ilex* L. (Aquifoliaceae): Evidence from the Comparison of Plastid and nuclear DNA Sequences and from fossil Data.**

In: Plant Systematics and Evolution 235 (1), p. 79–98. DOI: 10.1007/s00606-002-0225-x.

SELBACH-SCHNADELBACH, ALESSANDRA; CAVALLI, SUZANA SMITH; MANEN, JEAN-FRANÇOIS; COELHO, GERALDO CENI; SOUZA-CHIES, TATIANA TEIXEIRA DE (2009):

**New information for *Ilex* Phylogenetics based on the Plastid *psbA-trnH* intergenic spacer (Aquifoliaceae).**

In: Botanical Journal of the Linnean Society 159, p. 182–193.

## Araceae

CABRERA, LIDIA I.; SALAZAR, GERARDO A.; CHASE, MARK W.; MAYO, SIMON J.; BOGNER, JOSEF; DÁVILA, PATRICIA (2008):

**Phylogenetic Relationships of aroids and duckweeds (Araceae) inferred from coding and noncoding Plastid DNA.**

In: American Journal of Botany 95 (9), p. 1153–1165. DOI: 10.3732/ajb.0800073.

CARLSEN, MÓNICA M.; CROAT, THOMAS B. (2013):

**A molecular Phylogeny of the species-rich Neotropical Genus *Anthurium* (Araceae) based on combined Chloroplast and Nuclear DNA.**

In: Systematic Botany 38 (3), p. 576–588. DOI: 10.1600/036364413X670287.

CUSIMANO, NATALIE; BARRETT, MATTHEW D.; HETTERSCHIED, WILBERT L.A.; RENNER, SUSANNE P. (2010):

**A Phylogeny of the Areae (Araceae) implies that *Typhonium*, *Sauromatum*, and the Australian Species of *Typhonium* are distinct Clades.**

In: Taxon 59 (2), p. 439–447.

CUSIMANO, NATALIE; BOGNER, JOSEF; MAYO, SIMON J.; BOYCE, PETER C.; WONG, SIN YENG; HESSE, MICHAEL ET AL. (2011):

**Relationships within the Araceae: Comparison of morphological Patterns with molecular Phylogenies.**

In: American Journal of Botany 98 (4), p. 654–668. DOI: 10.3732/ajb.1000158.

ESPÍNDOLA, ANAHÍ; BUERKI, SVEN; BEDALOV, MARIJA; KÜPFER, PHILIPPE; ALVAREZ, NADIR (2010):

- New Insights into the Phylogenetics and Biogeography of *Arum* (Araceae): unravelling its evolutionary History.**  
In: Botanical Journal of the Linnean Society 163 (1), p. 14–32. DOI: 10.1111/j.1095-8339.2010.01049.x.
- GAUTHIER, MARIE-PIERRE L.; BARABÉ, DENIS; BRUNEAU, ANNE (2008):  
Molecular Phylogeny of the Genus *Philodendron* (Araceae): Delimitation and infrageneric Classification.**  
In: Botanical Journal of the Linnean Society 156 (1), p. 13–27. DOI: 10.1111/j.1095-8339.2007.00733.x.
- GONÇALVES, EDUARDO G.; MAYO, SIMON J.; VAN SLUYS, MARIE-ANNE; SALATINO, ANTONIO (2007):  
Combined genotypic-phenotypic Phylogeny of the Tribe Spathicarpeae (Araceae) with Reference to independent Events of Invasion to Andean Regions.**  
In: Molecular Phylogenetics and Evolution 43 (3), p. 1023–1039. DOI: 10.1016/j.ympev.2007.01.008.
- GROB, G. B.J.; GRAVENDEEL, BARBARA; EURLINGS, MARCEL C.M. (2004):  
Potential phylogenetic utility of the nuclear Floricaula/leafy second Intron: Comparison with three Chloroplast DNA Regions in *Amorphophallus* (Araceae).**  
In: Molecular Phylogenetics and Evolution 30 (1), p. 13–23. DOI: 10.1016/S1055-7903(03)00183-0.
- GROB, G. B.J.; GRAVENDEEL, BARBARA; EURLINGS, MARCEL C.M.; HETTERSCHIED, WILBERT L.A. (2002):  
Phylogeny of the Tribe Thomsonieae (Araceae) based on Chloroplast matK and trnL Intron Sequences.**  
In: Systematic Botany 27 (3), p. 453–467.
- HENRIQUEZ, CLAUDIA L.; ARIAS, TATIANA; PIRES, J. CHRIS; CROAT, THOMAS B.; SCHAAL, BARBARA A. (2014):  
Phylogenomics of the Plant Family Araceae.**  
In: Molecular Phylogenetics and Evolution 75, p. 91–102. DOI: 10.1016/j.ympev.2014.02.017.
- HETTERSCHIED, WILBERT L.A.; CLAUDEL, CYRILLE (2012):  
The End of *Pseudodracontium* N.E.Br.**  
In: Aroideana 35, p. 40–46.
- LES, DONALD H.; CRAWFORD, DANIEL J.; LANDOLT, ELIAS; GABEL, JOHN D.; KIMBALL, REBECCA T. (2002):  
Phylogeny and Systematics of Lemnaceae, the Duckweed Family.**  
In: Systematic Botany 27 (2), p. 221–240.
- LIN, JEANINE; STÖKL, JOHANNES; URRU, ISABELLA; KRÜGEL, TAMARA; STENSMYR, MARCUS C. (2010):  
Molecular Phylogeny of the Genus *Arum* (Araceae) inferred from multi-locus Sequence Data and AFLPs.**  
In: Taxon 59 (2), p. 405–415.
- LOW, SHOOK LING; WONG, SIN YENG; BOYCE, PETER C. (2014):  
*Schottarum* (Schismatoglottideae: Araceae) substantiated based on combined nuclear and Plastid DNA Sequences.**  
In: Plant Systematics and Evolution 300 (4), p. 607–617. DOI: 10.1007/s00606-013-0906-7.
- MAGEE, ANTHONY RICHARD; VAN WYK, BEN-ERIK; TILNEY, PATRICIA M.; DOWNIE, STEPHEN R. (2010):  
Phylogenetic Position of African and Malagasy *Pimpinella* Species and related Genera (Apiaceae, Pimpinelleae).**  
In: Plant Systematics and Evolution 288 (3-4), p. 201–211. DOI: 10.1007/s00606-010-0325-y.
- MEKKERDCHOO, ORACHORN; BOROMPICHAICHARTKUL, CHALEEDA; PERRIGO, ALLISON; SRZEDNICKI, GEORGE; PRAKITCHAIWATTANA, CHEUNJIT; ANTONELLI, ALEXANDRE (2016):  
Tracing the Evolution and Economic Potential of Konjac Glucomannan in *Amorphophallus* Species (Araceae) using molecular Phylogeny and Rapid Markers.**

In: Phytotaxa 282 (2), p. 81. DOI: 10.11646/phytotaxa.282.2.1.

**NAUHEIMER, LARS; BOYCE, PETER C. (2014):**

***Englerarum* (Araceae, Aroideae): a new Genus supported by Plastid and nuclear Phylogenies.**

In: Plant Systematics and Evolution 300 (4), p. 709–715. DOI: 10.1007/s00606-013-0914-7.

**NAUHEIMER, LARS; BOYCE, PETER C.; RENNER, SUSANNE P. (2012):**

**Giant taro and its relatives: a Phylogeny of the large Genus *Alocasia* (Araceae) sheds Light on Miocene floristic Exchange in the Malesian Region.**

In: Molecular Phylogenetics and Evolution 63 (1), p. 43–51. DOI: 10.1016/j.ympev.2011.12.011.

**NIE, ZE-LONG; SUN, HANG; LI, HENG; WEN, JUN (2006):**

**Intercontinental Biogeography of Subfamily Orontioideae (Symplocarpus, Lysichiton, and Orontium) of Araceae in Eastern Asia and North America.**

In: Molecular Phylogenetics and Evolution 40 (1), p. 155–165. DOI: 10.1016/j.ympev.2006.03.012.

**OHI-TOMA, TETSUO; WU, SUGONG; MURATA, HIROKO; MURATA, JIN (2016):**

**An updated Genus-wide phylogenetic Analysis of *Arisaema* (Araceae) with Reference to Sections.**

In: Botanical Journal of the Linnean Society 182 (1), p. 100–114. DOI: 10.1111/boj.12459.

**OHI-TOMA, TETSUO; WU, SUGONG; YADAV, SHRIRANG RAMCHANDRA; MURATA, HIROKO; MURATA, JIN (2010):**

**Molecular Phylogeny of *Typhonium* sensu lato and its allied Genera in the Tribe Areae of the Subfamily Aroideae (Araceae) based on Sequences of six Chloroplast Regions.**

In: Systematic Botany 35 (2), p. 244–251. DOI: 10.1600/036364410791638315.

**RENNER, SUSANNE S.; ZHANG, LI-BING (2004):**

**Biogeography of the *Pistia* Clade (Araceae): based on Chloroplast and Mitochondrial DNA Sequences and Bayesian Divergence Time Inference.**

In: Systematic Biology 53 (3), p. 422–432. DOI: 10.1080/10635150490445904.

**RENNER, SUSANNE S.; ZHANG, LI-BING; MURATA, JIN (2004):**

**A Chloroplast Phylogeny of *Arisaema* (Araceae) illustrates Tertiary floristic links between Asia, North America, and East Africa.**

In: American Journal of Botany 91 (6), p. 881–888. DOI: 10.3732/ajb.91.6.881.

**ROTHWELL, GAR W.; VAN ATTA, MICHELLE R.; BALLARD, HARVEY EUGENE; STOCKEY, RUTH A. (2004):**

**Molecular phylogenetic Relationships among Lemnaceae and Araceae using the Chloroplast trnL–trnF intergenic Spacer.**

In: Molecular Phylogenetics and Evolution 30 (2), p. 378–385. DOI: 10.1016/S1055-7903(03)00205-7.

**SOARES, MARIA DE LOURDES; MAYO, SIMON J.; GRIBEL, ROGÉRIO (2013):**

**A Preliminary taxonomic Revision of *Heteropsis* (Araceae).**

In: Systematic Botany 38 (4), p. 925–974. DOI: 10.1600/036364413X674715.

**TAM, SHEH-MAY; BOYCE, PETER C.; UPSON, TIM M.; BARABÉ, DENIS; BRUNEAU, ANNE; FOREST, FÉLIX; PARKER, JOHN P. (2004):**

**Intergeneric and infrafamilial Phylogeny of Subfamily Monsteroideae (Araceae) revealed by Chloroplast trnL-F Sequences.**

In: American Journal of Botany 91 (3), p. 490–498. DOI: 10.3732/ajb.91.3.490.

**TIPPERY, NICHOLAS P.; LES, DONALD H.; CRAWFORD, DANIEL J. (2015):**

**Evaluation of phylogenetic Relationships in Lemnaceae using nuclear ribosomal Data.**

In: Plant Biology 17 Suppl 1, p. 50–58. DOI: 10.1111/plb.12203.

**TRUDGEN, MELINDA S.; BAKER, WILLIAM J. (2008):**

**A Revision of the *Heterospathe elegans* (Arecaceae) complex in New Guinea.**

In: Kew Bulletin 63 (4), p. 639–647. DOI: 10.1007/s12225-008-9063-5.

**VASCONCELOS, SANTELMO; SOARES, MARIA DE LOURDES; SAKURAGUI, CÁSSIA M.; CROAT, THOMAS B.; OLIVEIRA, GUILHERME; BENKO-ISEPPON, ANA MARIA (2018):**

**New Insights on the phylogenetic Relationships among the traditional *Philodendron* subgenera and the other Groups of the *Homalomena* Clade (Araceae).**

In: Molecular Phylogenetics and Evolution 127, p. 168–178. DOI: 10.1016/j.ympev.2018.05.017.

**WONG, SIN YENG; BOYCE, PETER C.; OTHMAN, AHMAD SOFIMAN; PIN, LEAW CHUI (2010):**

**Molecular Phylogeny of Tribe Schismatoglottideae (Araceae) based on two Plastid Markers and Recognition of a new Tribe, Philonotieae, from the neotropics.**

In: Taxon 59 (1), p. 117–124.

**YENG, WONG SIN; MEEROW, ALAN W.; CROAT, THOMAS B. (2016):**

**Resurrection and new Species of the Neotropical Genus *Adelonema* (Araceae: *Philodendron* Clade).**

In: Systematic Botany 41 (1), p. 32–48. DOI: 10.1600/036364416X690732.

## **Araliaceae**

**ACKERFIELD, JENNIFER; WEN, JUN (2003):**

**Evolution of *Hedera* (the Ivy Genus, Araliaceae): Insights from Chloroplast DNA Data.**

In: International Journal of Plant Sciences 164 (4), p. 593–602.

**CHOI, KYOUNG-SU; PARK, SEON-JOO (2012):**

**Molecular phylogenetic Studies of Korean *Hydrocotyle* L.**

In: Korean Journal of Plant Resources 25 (4), p. 490–497. DOI: 10.7732/kjpr.2012.25.4.490.

**COI, HONG-KEUN; WEN, JUN (2000):**

**A phylogenetic Analysis of *Panax* (Araliaceae): integrating cpDNA restriction site and nuclear rDNA ITS Sequence Data.**

In: Plant Systematics and Evolution 224, p. 109–120.

**COSTELLO, ANNEMARIE; MOTLEY, TIMOTHY J. (2007):**

**Phylogenetics of the *Tetraplasandra* Group (Araliaceae) inferred from ITS, 5S-NTS, and Morphology.**

In: Systematic Botany 32 (2), p. 464–477. DOI: 10.1600/036364407781179626.

**FIASCHI, PEDRO; FRODIN, DAVID G. (2014):**

**Two new Combinations in Brazilian *Dendropanax* (Araliaceae).**

In: Phytotaxa 159 (3), p. 236. DOI: 10.11646/phytotaxa.159.3.6.

**GREEN, ADAM F.; RAMSEY, TARA S.; RAMSEY, JUSTIN (2011):**

**Phylogeny and Biogeography of Ivies (*Hedera* spp., Araliaceae), a polyploid Complex of woody Vines.**

In: Systematic Botany 36 (4), p. 1114–1127. DOI: 10.1600/036364411X605100.

**HENWOOD, MURRAY J.; LU-IRVING, PATRICIA; PERKINS, ANDREW J. (2010):**

**Can molecular Systematics provide Insights into aspects of the reproductive biology of *Trachymene* Rudge (Araliaceae)?**

In: Plant Diversity and Evolution 128 (1), p. 85–110. DOI: 10.1127/1869-6155/2010/0128-0004.

**HWANG, HWAN SU; CHOI, YONG EUI (2016):**

**Phylogenetic Analysis of 14 Korean Araliaceae Species using Chloroplast DNA Barcode Analysis.**

In: Journal of Plant Biotechnology 43 (1), p. 82–90. DOI: 10.5010/JPB.2016.43.1.82.

**KARUPPUSAMY, S.; ALI, M. AJMAL; RAJASEKARAN, K. M.; LEE, JOONGKU; KIM, SOO-YOUNG; PANDEY, ARUN KUMAR; AL-HEMAID, FAHAD M. A. (2014):**

**A new Species of *Hydrocotyle* L. (Araliaceae) from India.**

In: Bangladesh Journal of Plant Taxonomy 21 (2), p. 167–173.

**LEE, CHUNGHEE; WEN, JUN (2004):**

**Phylogeny of *Panax* using Chloroplast trnC-trnD intergenic Region and the utility of trnC-trnD in interspecific studies of plants.**

In: Molecular Phylogenetics and Evolution 31 (3), p. 894–903. DOI: 10.1016/j.ympev.2003.10.009.

**LI, RONG; WEN, JUN (2014):**

**Phylogeny and Biogeography of Asian *Schefflera* (Araliaceae) based on nuclear and Plastid DNA Sequence Data.**

In: Journal of Systematics and Evolution 52 (4), p. 431–449. DOI: 10.1111/jse.12052.

**LI, RONG; WEN, JUN (2016):**

**Phylogeny and Diversification of Chinese Araliaceae based on nuclear and Plastid DNA Sequence Data.**

In: Journal of Systematics and Evolution 54 (4), p. 453–467. DOI: 10.1111/jse.12196.

**LOWRY, PORTER PRESCOTT; PLUNKETT, GREGORY M. (2010):**

**Recircumscription of *Polyscias* (Araliaceae) to include six related Genera, with a new infrageneric Classification and a Synopsis of Species.**

In: Plant Diversity and Evolution 128 (1), p. 55–84. DOI: 10.1127/1869-6155/2010/0128-0003.

**LOWRY, PORTER PRESCOTT; PLUNKETT, GREGORY M.; GOSTEL, MORGAN R.; FRODIN, DAVID G. (2017):**

**A Synopsis of the Afro-Malagasy Species previously included in *Schefflera* (Araliaceae): Resurrection of the Genera *Astropanax* and *Neocussonia*.**

In: Candollea 72 (2), p. 265–282. DOI: 10.15553/c2017v722a4.

**MANZANILLA, V.; KOOL, ANNELEEN; NGUYEN NHAT, L.; NONG VAN, H.; LE THI THU, H.; BOER, HUGO J. (2018):**

**Phylogenomics and barcoding of *Panax*: toward the Identification of Ginseng Species.**

In: BMC Evolutionary Biology 18 (1), p. 44. DOI: 10.1186/s12862-018-1160-y.

**MITCHELL, ANTHONY D.; LI, RONG; BROWN, JOSEPH W.; SCHÖNBERGER, INES; WEN, JUN (2012):**

**Ancient Divergence and Biogeography of *Raukaua* (Araliaceae) and close Relatives in the Southern Hemisphere.**

In: Australian Systematic Botany 25 (6), p. 432. DOI: 10.1071/SB12020.

**MITCHELL, ANTHONY D.; WEN, JUN (2005):**

**Phylogeny of *Brassaiopsis* (Araliaceae) in Asia based on Nuclear ITS and 5S-NTS DNA Sequences.**

In: Systematic Botany 30 (4), p. 872–886. DOI: 10.1600/036364405775097761.

**NICOLAS, ANTOINE N.; PLUNKETT, GREGORY M. (2009):**

**The demise of Subfamily Hydrocotyloideae (Apiaceae) and the Re-alignment of its Genera across the entire Order Apiales.**

In: Molecular Phylogenetics and Evolution 53 (1), p. 134–151. DOI: 10.1016/j.ympev.2009.06.010.

**PERRIE, LEON R.; SHEPHERD, LARA D. (2009):**



**Reconstructing the Species Phylogeny of *Pseudopanax* (Araliaceae), a Genus of Hybridising Trees.**

In: *Molecular Phylogenetics and Evolution* 52 (3), p. 774–783. DOI: 10.1016/j.ympev.2009.05.030.

**PLUNKETT, GREGORY M.; LOWRY, PORTER PRESCOTT II.; VU, NINH V. (2004):**

**Phylogenetic Relationships among *Polyscias* (Araliaceae) and close Relatives from the Western Indian Ocean Basin.**

In: *International Journal of Plant Sciences* 165 (5), p. 861–873.

**PLUNKETT, GREGORY M.; WEN, JUN; LOWRY, PORTER PRESCOTT II. (2004):**

**Infrafamilial Classifications and Characters in Araliaceae: Insights from the phylogenetic Analysis of nuclear (ITS) and Plastid (trnL-trnF) Sequence Data.**

In: *Plant Systematics and Evolution* 245 (1-2). DOI: 10.1007/s00606-003-0101-3.

**TRONCHET, FRÉDÉRIC; PLUNKETT, GREGORY M.; JÉRÉMIE, JOËL; LOWRY, PORTER PRESCOTT (2005):**

**Monophyly and major Clades of *Meryta* (Araliaceae).**

In: *Systematic Botany* 30 (3), p. 657–670. DOI: 10.1600/0363644054782279.

**VALCÁRCEL, VIRGINIA; FIZ, OMAR; VARGAS, PABLO (2003):**

**Chloroplast and nuclear Evidence for multiple Origins of polyploids and diploids of *Hedera* (Araliaceae) in the Mediterranean basin.**

In: *Molecular Phylogenetics and Evolution* 27 (1), p. 1–20. DOI: 10.1016/S1055-7903(02)00364-0.

**VALCÁRCEL, VIRGINIA; FIZ-PALACIOS, OMAR; WEN, JUN (2014):**

**The Origin of the early differentiation of ivies (*Hedera* L.) and the Radiation of the Asian Palmate Group (Araliaceae).**

In: *Molecular Phylogenetics and Evolution* 70, p. 492–503. DOI: 10.1016/j.ympev.2013.10.016.

**VALCÁRCEL, VIRGINIA; VARGAS, PABLO (2010):**

**Quantitative Morphology and Species Delimitation under the General Lineage Concept: Optimization for *Hedera* (Araliaceae).**

In: *American Journal of Botany* 97 (9), p. 1555–1573. DOI: 10.3732/ajb.1000115.

**VALCÁRCEL, VIRGINIA; VARGAS, PABLO (2013):**

**Phylogenetic Reconstruction of key traits in the Evolution of ivies (*Hedera* L.).**

In: *Plant Systematics and Evolution* 299 (2), p. 447–458. DOI: 10.1007/s00606-012-0734-1.

**WEN, JUN (2000):**

**Internal Transcribed Space Phylogeny of the Asian and Eastern North American disjunct *Aralia* Sect. *Dimorphanthus* (Araliaceae) and its biogeographic Implications.**

In: *International Journal of Plant Sciences* 161 (6), p. 959–966.

**WEN, JUN; CHUNGHEE, LEE; LOWRY, PORTER PRESCOTT II.; HIEP, NGUYEN TIEN (2003):**

**Inclusion of the Vietnamese endemic Genus *Grushvitzkya* in *Brassaiopsis* (Araliaceae): Evidence from nuclear ribosomal ITS and Chloroplast ndh F Sequences.**

In: *Botanical Journal of the Linnean Society* 142, p. 455–463.

**WEN, JUN; PLUNKETT, GREGORY M.; MITCHELL, ANTHONY D.; WAGSTAFF, STEVEN J. (2001):**

**The Evolution of Araliaceae: A phylogenetic Analysis based on ITS Sequences of Nuclear Ribosomal DNA.**

In: *Systematic Botany* 26 (1), p. 144–167.

**ZUO, YUN-JUAN; WEN, JUN; ZHOU, SHI-LIANG (2017):**

**Intercontinental and intracontinental Biogeography of the eastern Asian - Eastern North American disjunct *Panax* (the Ginseng Genus, Araliaceae), emphasizing its Diversification Processes in Eastern Asia.**

In: *Molecular Phylogenetics and Evolution* 117, p. 60–74. DOI: 10.1016/j.ympev.2017.06.016.

## **Araucariaceae**

ESCAPA, IGNACIO H.; CATALANO, SANTIAGO A. (2013):

**Phylogenetic Analysis of Araucariaceae: Integrating Molecules, Morphology, and Fossils.**

In: *International Journal of Plant Sciences* 174 (8), p. 1153–1170. DOI: 10.1086/672369.

GAUDEUL, MYRIAM; GARDNER, MARTIN F.; THOMAS, PHILIP I.; ENNOS, RICHARD A.; HOLLINGSWORTH, PETER M. (2014):

**Evolutionary dynamics of emblematic *Araucaria* Species (Araucariaceae) in New Caledonia: nuclear and Chloroplast Markers suggest recent Diversification, introgression, and a tight Link between Genetics and Geography within Species.**

In: *BMC Evolutionary Biology* 14, p. 171. DOI: 10.1186/s12862-014-0171-6.

GAUDEUL, MYRIAM; ROUHAN, GERMINAL; GARDNER, MARTIN F.; HOLLINGSWORTH, PETER M. (2012):

**AFLP Markers provide Insights into the evolutionary Relationships and Diversification of New Caledonian *Araucaria* Species (Araucariaceae).**

In: *American Journal of Botany* 99 (1), p. 68–81. DOI: 10.3732/ajb.1100321.

KNAPP, MICHAEL; MUDALIAR, RAGINI; HAVELL, DAVID; WAGSTAFF, STEVEN J.; LOCKHART, PETER J. (2007):

**The drowning of New Zealand and the problem of *Agathis*.**

In: *Systematic Biology* 56 (5), p. 862–870. DOI: 10.1080/10635150701636412.

LIU, NIAN; ZHU, YONG; WEI, ZONGXIAN; CHEN, JIE; WANG, QINGBIAO; JIAN, SHU-GUANG ET AL. (2009):

**Phylogenetic Relationships and Divergence times of the Family Araucariaceae based on the DNA Sequences of eight Genes.**

In: *Science Bulletin* 54 (15), p. 2648–2655. DOI: 10.1007/s11434-009-0373-2.

STEFENON, BY V. M.; GAILING, OLIVER; FINKELDEY, REINER (2006):

**Phylogenetic Relationship within Genus *Araucaria* (Araucariaceae) assessed by means of AFLP Fingerprints.**

In: *Silvae Genetica* 55 (2), p. 45–52.

ZONNEVELD, BEN J. M. (2012):

**Genome sizes of all 19 *Araucaria* Species are correlated with their geographical Distribution.**

In: *Plant Systematics and Evolution* 298 (7), p. 1249–1255. DOI: 10.1007/s00606-012-0631-7.

## **Arecaceae**

ALAPETITE, ELODIE; BAKER, WILLIAM J.; NADOT, SOPHIE (2014):

**Evolution of stamen Number in Ptychospermatinae (Arecaceae): Insights from a new molecular Phylogeny of the Subtribe.**

In: *Molecular Phylogenetics and Evolution* 76, p. 227–240. DOI: 10.1016/j.ympev.2014.02.026.

ASMUSSEN-LANGE, CONNY B.; DRANSFIELD, JOHN; DEICKMANN, VINNIE; BARFOD, ANDERS S.; PINTAUD, JEAN-CHRISTOPHE; BAKER, WILLIAM J. (2006):

**A new Subfamily Classification of the Palm Family (Arecaceae): Evidence from Plastid DNA Phylogeny.**

In: *Botanical Journal of the Linnean Society* 151 (1), p. 15–38. DOI: 10.1111/j.1095-8339.2006.00521.x.

BACON, CHRISTINE D.; BAKER, WILLIAM J.; SIMMONS, MARK P. (2012):

**Miocene Dispersal drives Island Radiations in the Palm Tribe Trachycarpeae (Arecaceae).**

In: Systematic Biology 61 (3), p. 426–442. DOI: 10.1093/sysbio/syr123.

**BACON, CHRISTINE D.; MCKENNA, MILES J.; SIMMONS, MARK P.; WAGNER, WARREN L. (2012):**

**Evaluating multiple criteria for Species Delimitation: an empirical example using Hawaiian Palms (Arecaceae: Pritchardia).**

In: BMC Evolutionary Biology 12, p. 23. DOI: 10.1186/1471-2148-12-23.

**BAKER, WILLIAM J. (2015):**

**A revised Delimitation of the rattan Genus *Calamus* (Arecaceae).**

In: Phytotaxa 197 (2), p. 139. DOI: 10.11646/phytotaxa.197.2.7.

**BAKER, WILLIAM J.; DRANSFIELD, JOHN; HEDDERSON, TERRY A. (2000):**

**Phylogeny, Character Evolution, and a new Classification of the Calamoid Palms.**

In: Systematic Botany 25 (2), p. 297. DOI: 10.2307/2666644.

**BAKER, WILLIAM J.; NORUP, MARIA VIBE; CLARKSON, JAMES J.; COUVREUR, THOMAS L.P.; DOWE, JOHN L.; LEWIS, CARL E. ET AL. (2011):**

**Phylogenetic Relationships among Arecoid Palms (Arecaceae: Arecoideae).**

In: Annals of Botany 108 (8), p. 1417–1432. DOI: 10.1093/aob/mcr020.

**BAKER, WILLIAM J.; SAVOLAINEN, VINCENT; ASMUSSEN-LANGE, CONNY B.; CHASE, MARK W.; DRANSFIELD, JOHN; FOREST, FÉLIX ET AL. (2009):**

**Complete generic-level phylogenetic Analyses of Palms (Arecaceae) with Comparisons of Supertree and Supermatrix Approaches.**

In: Systematic Biology 58 (2), p. 240–256. DOI: 10.1093/sysbio/syp021.

**CANO, ÁNGELA; PERRET, MATHIEU; STAUFFER, FRED W. (2013):**

**A Revision of the Genus *Trithrinax* (Cryosophileae, Coryphoideae, Arecaceae).**

In: Phytotaxa 136 (1), p. 1. DOI: 10.11646/phytotaxa.136.1.1.

**COMER, JASON R.; ZOMLEFER, WENDY B.; BARRETT, CRAIG F.; DAVIS, JERROLD I.; STEVENSON, DENNIS WM.; HEYDUK, KAROLINA; LEEBENS-MACK, JAMES H. (2015):**

**Resolving Relationships within the Palm Subfamily Arecoideae (Arecaceae) using Plastid Sequences derived from Next-Generation Sequencing.**

In: American Journal of Botany 102 (6), p. 888–899. DOI: 10.3732/ajb.1500057.

**COMER, JASON R.; ZOMLEFER, WENDY B.; BARRETT, CRAIG F.; STEVENSON, DENNIS WM.; HEYDUK, KAROLINA; LEEBENS-MACK, JAMES H. (2016):**

**Nuclear phylogenomics of the Palm Subfamily Arecoideae (Arecaceae).**

In: Molecular Phylogenetics and Evolution 97, p. 32–42. DOI: 10.1016/j.ympev.2015.12.015.

**CRISP, MICHAEL D.; ISAGI, YUJI; KATO, YOHEI; COOK, LYN G.; BOWMAN, DAVID M. J. P. (2010):**

***Livistona* palms in Australia: ancient Relics or opportunistic Immigrants?**

In: Molecular Phylogenetics and Evolution 54 (2), p. 512–523. DOI: 10.1016/j.ympev.2009.09.020.

**CUENCA, ARGELIA; ASMUSSEN-LANGE, CONNY B. (2007):**

**Phylogeny of the Palm Tribe Chamaedoreae (Arecaceae) based on Plastid DNA Sequences.**

In: Systematic Botany 32 (2), p. 250–263. DOI: 10.1600/036364407781179644.

**CUENCA, ARGELIA; ASMUSSEN-LANGE, CONNY B.; BORCHSENIUS, FINN (2008):**

**A dated Phylogeny of the Palm Tribe Chamaedoreae supports Eocene Dispersal between Africa, North and South America.**

In: Molecular Phylogenetics and Evolution 46 (2), p. 760–775. DOI: 10.1016/j.ympev.2007.10.010.

- CUENCA, ARGELIA; DRANSFIELD, JOHN; ASMUSSEN-LANGE, CONNY B. (2009):**  
**Phylogeny and Evolution of morphological Characters in Tribe Chamaedoreae (Arecaceae).**  
In: *Taxon* 58 (4), p. 1092–1108.
- DOMENECH, BORIS; ASMUSSEN-LANGE, CONNY B.; BAKER, WILLIAM J.; ALAPETITE, ELODIE; PINTAUD, JEAN-CHRISTOPHE; NADOT, SOPHIE (2014):**  
**A phylogenetic Analysis of Palm Subtribe Archontophoenicinae (Arecaceae) based on 14 DNA Regions.**  
In: *Botanical Journal of the Linnean Society* 175 (4), p. 469–481. DOI: 10.1111/boj.12179.
- DRANSFIELD, JOHN; UHL, NATALIE W.; ASMUSSEN-LANGE, CONNY B.; BAKER, WILLIAM J.; HARLEY, MADELINE M.; LEWIS, CARL E. (2005):**  
**A new phylogenetic Classification of the Palm Family, Arecaceae.**  
In: *Kew Bulletin* 60, p. 559–569.
- EISERHARDT, WOLF L.; PINTAUD, JEAN-CHRISTOPHE; ASMUSSEN-LANGE, CONNY B.; HAHN, WILLIAM J.; BERNAL, RODRIGO; BALSLEV, HENRIK; BORCHSENIUS, FINN (2011):**  
**Phylogeny and Divergence times of Bactridinae (Arecaceae, Palmae) based on Plastid and nuclear DNA Sequences.**  
In: *Taxon* 60 (2), p. 485–498.
- FAURBY, SØREN; EISERHARDT, WOLF L.; BAKER, WILLIAM J.; SVENNING, JENS-CHRISTIAN (2016):**  
**An all-Evidence Species-level Supertree for the Palms (Arecaceae).**  
In: *Molecular Phylogenetics and Evolution* 100, p. 57–69. DOI: 10.1016/j.ympev.2016.03.002.
- HAHN, WILLIAM J. (2002):**  
**A molecular phylogenetic Study of the Palmae (Arecaceae) based on atpB, rbcl, and 18s nrDNA Sequences.**  
In: *Systematic Biology* 51 (1), p. 92–112.
- HAHN, WILLIAM J. (2002):**  
**A phylogenetic Analysis of the Arecoide Line of Palms based on Plastid DNA Sequence Data.**  
In: *Molecular Phylogenetics and Evolution* 23 (2), p. 189–204. DOI: 10.1016/S1055-7903(02)00022-2.
- HENDERSON, ANDREW J. (2002):**  
**Phenetic and phylogenetic Analysis of *Reinhardtia* (Palmae).**  
In: *American Journal of Botany* 89 (9), p. 1491–1502. DOI: 10.3732/ajb.89.9.1491.
- HENDERSON, ANDREW J. (2005):**  
**A multivariate Study of *Calyptrogyne* (Palmae).**  
In: *Systematic Botany* 30 (1), p. 60–83. DOI: 10.1600/0363644053661913.
- HENDERSON, ANDREW J. (2011):**  
**A Revision of *Desmoncus* (Arecaceae).**  
Auckland, N.Z.: Magnolia Press (Phytotaxa, 35).
- HENDERSON, ANDREW J. (2011):**  
**A Revision of *Geonoma* (Arecaceae).**  
Auckland, N.Z.: Magnolia Press (Phytotaxa, 17).
- HENDERSON, ANDREW J. (2012):**  
**A Revision of *Pholidostachys* (Arecaceae).**  
In: *Phytotaxa* 43, p. 1–48.
- HORN, JAMES W.; FISHER, JACK B.; TOMLINSON, P. BARRY; LEWIS, CARL E.; LAUBENGAYER, KAREN (2009):**

- Evolution of Lamina Anatomy in the Palm Family (Arecaceae).**  
In: American Journal of Botany 96 (8), p. 1462–1486. DOI: 10.3732/ajb.0800396.
- KEIM, ARY P.R.Y.; DRANSFIELD, JOHN (2012):**  
**A monograph of the Genus *Orania* (Arecaceae: Oranieae).**  
In: Kew Bulletin 67, p. 127–190.
- LEWIS, CARL E.; DOYLE, J. J. (2002):**  
**A phylogenetic Analysis of Tribe Areceae (Arecaceae) using two low-copy nuclear Genes.**  
In: Plant Systematics and Evolution 236 (1), p. 1–17. DOI: 10.1007/s00606-002-0205-1.
- LOO, ADRIAN H. B.; DRANSFIELD, JOHN; CHASE, MARK W.; BAKER, WILLIAM J. (2006):**  
**Low-copy nuclear DNA, Phylogeny and the Evolution of Dichogamy in the Betel Nut Palms and their Relatives (Arecinae; Arecaceae).**  
In: Molecular Phylogenetics and Evolution 39 (3), p. 598–618. DOI: 10.1016/j.ympev.2005.12.006.
- LUDEÑA, BERTHA; CHABRILLANGE, NATHALIE; ABERLENC-BERTOSSI, FRÉDÉRIQUE; ADAM, HÉLÈNE; TREGEAR, JAMES W.; PINTAUD, JEAN-CHRISTOPHE (2011):**  
**Phylogenetic utility of the nuclear Genes *Agamous 1* and *Phytochrome B* in Palms (Arecaceae): an Example within Bactridinae.**  
In: Annals of Botany 108 (8), p. 1433–1444. DOI: 10.1093/aob/mcr191.
- NOBLICK, LARRY R.; HAHN, WILLIAM J.; GRIFFITH, M. PATRICK (2012):**  
**Structural cladistic Study of Cocoseae, Subtribe Attaleinae (Arecaceae): Evaluating taxonomic Limits in Attaleinae and the Neotropical Genus *Syagrus*.**  
In: Brittonia 65 (2), p. 232–261.
- NORUP, MARIA VIBE; DRANSFIELD, JOHN; CHASE, MARK W.; BARFOD, ANDERS S.; FERNANDO, EDWINO S.; BAKER, WILLIAM J. (2006):**  
**Homoplasious Character Combinations and generic Delimitation : a case Study from the Indo-Pacific Arecoid Palms (Arecaceae: Areceae).**  
In: American Journal of Botany 93 (7), p. 1065–1080. DOI: 10.3732/ajb.93.7.1065.
- RIVERA, DIEGO; OBÓN, CONCEPCIÓN; GARCÍA-ARTEAGA, JOAQUÍN; EGEA, TERESA; ALCARAZ, FRANCISCO; LAGUNA, EMILIO ET AL. (2014):**  
**Carpological Analysis of *Phoenix* (Arecaceae): contributions to the Taxonomy and evolutionary History of the Genus.**  
In: Botanical Journal of the Linnean Society 175 (1), p. 74–122. DOI: 10.1111/boj.12164.
- RONCAL, JULISSA; FRANCISCO-ORTEGA, JAVIER; ASMUSSEN-LANGE, CONNY B.; LEWIS, CARL E. (2005):**  
**Molecular Phylogenetics of Tribe Geonomeae (Arecaceae) using Nuclear DNA Sequences of Phosphoribulokinase and RNA Polymerase II.**  
In: Systematic Botany 30 (2), p. 275–283. DOI: 10.1600/0363644054223620.
- SANÍN, MARÍA JOSÉ; GALEANO, GLORIA (2011):**  
**A Revision of the Andean Wax Palms, *Ceroxylon* (Arecaceae).**  
Auckland, N.Z.: Magnolia Press (Phytotaxa, 34).
- SUNDERLAND, TERRY C. H. (2012):**  
**A taxonomic Revision of the Rattans of Africa ('Arecaceae' : 'Calamoideae').**  
Auckland: Magnolia Press (Phytotaxa, 51).
- THOMAS, MEREDITH M.; GARWOOD, NANCY C.; BAKER, WILLIAM J.; HENDERSON, SALLY A.; RUSSELL, STEPHEN J.; HODEL, DONALD R.; BATEMAN, RICHARD M. (2006):**

**Molecular Phylogeny of the palm Genus *Chamaedorea*, based on the low-copy nuclear Genes Prk and Rpb2.**

In: *Molecular Phylogenetics and Evolution* 38 (2), p. 398–415. DOI: 10.1016/j.ympev.2005.08.019.

TRÉNEL, PHILIPP; GUSTAFSSON, MATS H.G.; BAKER, WILLIAM J.; ASMUSSEN-LANGE, CONNY B.; DRANSFIELD, JOHN; BORCHSENIUS, FINN (2007):

**Mid-Tertiary Dispersal, not Gondwanan Vicariance explains Distribution Patterns in the Wax Palm Subfamily (Ceroxyloideae: Arecaceae).**

In: *Molecular Phylogenetics and Evolution* 45 (1), p. 272–288. DOI: 10.1016/j.ympev.2007.03.018.

ZONA, SCOTT (2005):

**A Revision of *Ptychococcus* (Arecaceae).**

In: *Systematic Botany* 30 (3), p. 520–529.

ZONA, SCOTT; FRANCISCO-ORTEGA, JAVIER; JESTROW, BRETT; BAKER, WILLIAM J.; LEWIS, CARL E. (2011):

**Molecular Phylogenetics of the Palm Subtribe *Ptychospermatinae* (Arecaceae).**

In: *American Journal of Botany* 98 (10), p. 1716–1726. DOI: 10.3732/ajb.1100218.

## **Aristolochiaceae**

BERJANO, REGINA; ROA, FERNANDO; TALAVERA, SALVADOR; GUERRA, MARCELO (2009):

**CytoTaxonomy of diploid and polyploid *Aristolochia* (Aristolochiaceae) Species based on the Distribution of Cma/dapi bands and 5s and 45s rDNA sites.**

In: *Plant Systematics and Evolution* 280 (3-4), p. 219–227. DOI: 10.1007/s00606-009-0184-6.

BUCHWALDER, KATJA; SAMAIN, MARIE-STÉPHANIE; SANKOWSKY, GARRY; NEINHUIS, CHRISTOPH; WANKE, STEFAN (2014):

**Nomenclatural updates of *Aristolochia* Subgenus *Pararistolochia* (Aristolochiaceae).**

In: *Australian Systematic Botany* 27 (1), p. 48–55. DOI: 10.1071/SB13042.

NEINHUIS, C.; WANKE, STEFAN; HILU, KHIDIR W.; MÜLLER, KAI F.; BORSCH, THOMAS (2005):

**Phylogeny of Aristolochiaceae based on Parsimony, Likelihood, and Bayesian Analyses of trnL-trnF Sequences.**

In: *Plant Systematics and Evolution* 250 (1-2), p. 7–26. DOI: 10.1007/s00606-004-0217-0.

OHI-TOMA, TETSUO; SUGAWARA, TAKASHI; MURATA, HIROKO; WANKE, STEFAN; NEINHUIS, CHRISTOPH; MURATA, JIN (2006):

**Molecular Phylogeny of *Aristolochia* sensu lato (Aristolochiaceae) based on Sequences of rbcL, matK, and phyA Genes, with Special Reference to Differentiation of Chromosome Numbers.**

In: *Systematic Botany* 31 (3), p. 481–492.

WANKE, STEFAN; GONZÁLEZ, FAVIO; NEINHUIS, CHRISTOPH (2006):

**Systematics of Pipevines: Combining morphological and Fast-Evolving molecular Characters to Investigate the Relationships within Subfamily Aristolochioideae (Aristolochiaceae).**

In: *International Journal of Plant Sciences* 167 (6), p. 1215–1227.

## **Arthropteridaceae**

LIU, HONG-MEI; JIANG, RI-HONG; GUO, JIAN; HOVENKAMP, PETER H.; PERRIE, LEON R.; SHEPHERD, LARA D. ET AL. (2013):

**Towards a phylogenetic Classification of the climbing Fern Genus *Arthropteris*.**

In: *Taxon* 62 (4), p. 688–700. DOI: 10.12705/624.26.

## **Asaraceae**

**KELLY, LAWRENCE M. (1998):**

**Phylogenetic Relationships in *Asarum* (Aristolochiaceae) based on Morphology and ITS Sequences.**

In: American Journal of Botany 85 (10), p. 1454–1467. DOI: 10.2307/2446402.

**SINN, BRANDON T.; KELLY, LAWRENCE M.; FREUDENSTEIN, JOHN V. (2015):**

**Phylogenetic Relationships in *Asarum*: Effect of Data Partitioning and a revised Classification.**

In: American Journal of Botany 102 (5), p. 765–779. DOI: 10.3732/ajb.1400316.

**SINN, BRANDON T.; KELLY, LAWRENCE M.; FREUDENSTEIN, JOHN V. (2015):**

**Putative Floral brood-site mimicry, loss of autonomous selfing, and reduced vegetative Growth are significantly correlated with increased Diversification in *Asarum* (Aristolochiaceae).**

In: Molecular Phylogenetics and Evolution 89, p. 194–204. DOI: 10.1016/j.ympev.2015.04.019.

**SUGAWARA, TAKASHI; FIJII, NORIYUKI; SENNI, KEI; MURATA, JIN (2005):**

**Morphological and karyological Characteristics and phylogenetic Relationship of *Asarum cordifolium* C.E.Fisch. (Aristolochiaceae) occurring in Myanmar.**

In: Acta Phytotaxonomica Geobotanica 56 (3), p. 247–255.

**YAMAJI, HIROKI; FUKUDA, TATSUYA; YOKOYAMA, JUN U.N.; PAK, JAE-HONG; ZHOU, CHANG-ZHENG; YANG, CHUN-SHU ET AL. (2007):**

**Reticulate Evolution and Phylogeography in *Asarum* Sect. *Asiasarum* (Aristolochiaceae) documented in internal transcribed Spacer Sequences (ITS) of nuclear ribosomal DNA.**

In: Molecular Phylogenetics and Evolution 44 (2), p. 863–884. DOI: 10.1016/j.ympev.2007.01.011.

## **Asparagaceae**

**FUKUDA, TATSUYA; ASHIZAWA, HIROKI; SUZUKI, RYOKO; OCHIAI, TOSHINORI; NAKAMURA, TORU; KANNO, AKIRA ET AL. (2005):**

**Molecular Phylogeny of the Genus *Asparagus* (Asparagaceae) inferred from Plastid *petB* Intron and *petD-rpoA* intergenic Spacer Sequences.**

In: Plant Species Biology 20 (2), p. 121–132. DOI: 10.1111/j.1442-1984.2005.00131.x.

**GÁNDARA, ETELVINA; SPECHT, CHELSEA D.; SOSA, VICTORIA (2014):**

**Origin and Diversification of the *Milla* Clade (Brodiaeoideae, Asparagaceae): a Neotropical Group of six geophytic Genera.**

In: Molecular Phylogenetics and Evolution 75, p. 118–125. DOI: 10.1016/j.ympev.2014.02.014.

**KUBOTA, SHOSEI; KONNO, ITARU; KANNO, AKIRA (2012):**

**Molecular Phylogeny of the Genus *Asparagus* (Asparagaceae) explains interspecific Crossability between the Garden *Asparagus* (*A. officinalis*) and other *Asparagus* Species.**

In: Theoretical and applied genetics 124 (2), p. 345–354. DOI: 10.1007/s00122-011-1709-2.

**NORUP, MARIA F.; PETERSEN, GITTE; BURROWS, SANDIE; BOUCHENAK-KHELLADI, YANIS; LEEBENS-MACK, JIM H.; PIRES, J. CHRIS ET AL. (2015):**

**Evolution of *Asparagus* L. (Asparagaceae): Out-of-South-Africa and multiple Origins of sexual Dimorphism.**

In: Molecular Phylogenetics and Evolution 92, p. 25–44. DOI: 10.1016/j.ympev.2015.06.002.

## **Asphodelaceae**

ADAMS, STUART P.; LEITCH, ILIA J.; BENNETT, MICHAEL D.; CHASE, MARK W.; LEITCH, ANDREW R. (2000):

**Ribosomal DNA Evolution and Phylogeny in *Aloe* (Asphodelaceae).**

In: American Journal of Botany 87 (11), p. 1578–1583. DOI: 10.2307/2656733.

CHASE, MARK W. (2000):

**Phylogenetics of Asphodelaceae (Asparagales): An Analysis of Plastid *rbcl* and *trnL-F* DNA Sequences.**

In: Annals of Botany 86 (5), p. 935–951. DOI: 10.1006/anbo.2000.1262.

DARU, BARNABAS H.; MANNING, JOHN C.; BOATWRIGHT, JAMES S.; MAURIN, OLIVIER; MACLEAN, NORMAN; SCHAEFER, HANNO ET AL. (2013):

**Molecular and morphological Analysis of Subfamily Alooideae (Asphodelaceae) and the inclusion of *Chortolirion* in *Aloe*.**

In: Taxon 62 (1), p. 62–76.

GRACE, OLWEN M.; KLOPPER, RONELL R.; SMITH, GIDEON F.; CROUCH, NEIL R.; FIGUEIREDO, ESTRELA; RØNSTED, NINA; VAN WYK, ABRAHAM E. (2013):

**A revised generic Classification for *Aloe* (Xanthorrhoeaceae Subfam. Asphodeloideae).**

In: Phytotaxa 76 (1), p. 7. DOI: 10.11646/phytotaxa.76.1.2.

KLOPPER, RONELL R.; VAN WYK, ABRAHAM E.; SMITH, GIDEON F. (2010):

**Phylogenetic Relationships in the Family Asphodelaceae (Asparagales).**

In: Biodiversity and Ecology 6.

MANNING, JOHN C.; BOATWRIGHT, JAMES S.; DARU, BARNABAS H.; MAURIN, OLIVIER; VAN DER BANK, MICHELLE (2014):

**A molecular Phylogeny and Generic Classification of Asphodelaceae Subfamily Alooideae: A Final Resolution of the Prickly Issue of Polyphyly in the Alooids?**

In: Systematic Botany 39 (1), p. 55–74. DOI: 10.1600/036364414X678044.

NADERI SAFAR, KOSAR; KAZEMPOUR-OSALOO, SHAHROKH; ASSADI, MOSTAFA; ZARREI, MEHDI; KHOSHOKHAN MOZAFFAR, MARYAM (2014):

**Phylogenetic Analysis of *Eremurus*, *Asphodelus*, and *Asphodeline* (Xanthorrhoeaceae-Asphodeloideae) inferred from Plastid *trnL-F* and nrDNA ITS Sequences.**

In: Biochemical Systematics and Ecology 56, p. 32–39. DOI: 10.1016/j.bse.2014.04.015.

RAMDHANI, SYD; BARKER, NIGEL P.; BAIJNATH, HIMANSU (2009):

**Rampant Non-Monophyly of Species in *Kniphofia* Moench (Asphodelaceae) suggests a recent Afromontane Radiation.**

In: Taxon 58 (4), p. 1141–1152. DOI: 10.1002/tax.584008.

RAMDHANI, SYD; BARKER, NIGEL P.; COWLING, RICHARD M. (2011):

**Revisiting Monophyly in *Haworthia* Duval (Asphodelaceae): Incongruence, Hybridization and contemporary speciation.**

In: Taxon 60 (4), p. 1001–1014.

TREUTLEIN, JENS; SMITH, GIDEON F.; WYK, B.-E.; WINK, MICHAEL (2003):

**Evidence for the Polyphyly of *Haworthia* (Asphodelaceae Subfamily Alooideae; Asparagales) inferred from Nucleotide Sequences of *rbcl*, *matK*, ITS1 and Genomic Fingerprinting with LSSR-PCR.**

In: Plant Biology 5 (5), p. 513–521. DOI: 10.1055/s-2003-44793.

## Aspleniaceae

HEEDE, CAROLINE J. VAN DEN; VIANE, RONALD L. L.; CHASE, MARK W. (2003):



**Phylogenetic Analysis of *Asplenium* Subgenus *Ceterach* (Pteridophyta: Aspleniaceae) based on Plastid and Nuclear Ribosomal ITS DNA Sequences.**

In: American Journal of Botany 90 (3), p. 481–495.

**OHLSEN, DANIEL J.; PERRIE, LEON R.; SHEPHERD, LARA D.; BROWNSEY, PATRICK J.; BAYLY, MICHAEL J. (2014): Investigation of Species boundaries and Relationships in the *Asplenium paleaceum* complex (Aspleniaceae) using AFLP fingerprinting and Chloroplast and nuclear DNA Sequences.**

In: Australian Systematic Botany 27 (6), p. 378–394. DOI: 10.1071/SB14024.

**OHLSEN, DANIEL J.; PERRIE, LEON R.; SHEPHERD, LARA D.; BROWNSEY, PATRICK J.; BAYLY, MICHAEL J. (2014): Phylogeny of the Fern Family Aspleniaceae in Australasia and the south-western Pacific.**

In: Australian Systematic Botany 27 (6), p. 355–371. DOI: 10.1071/SB14043.

**PERRIE, LEON R.; BROWNSEY, PATRICK J. (2005): Insights into the Biogeography and Polyploid Evolution of New Zealand *Asplenium* from Chloroplast DNA Sequence Data.**

In: American Fern Journal 95 (1), p. 1–21. DOI: 10.1640/0002-8444(2005)095[0001:ITBAP]2.0.CO;2.

**SCHNEIDER, HARALD; RUSSELL, STEVE J.; COX, CYMON J.; BAKKER, FREEK T.; HENDERSON, SALLY A.; RUMSEY, FRED ET AL. (2004):**

**Chloroplast Phylogeny of Asplenioid Ferns based on *rbcl* and *trnL-F* Spacer Sequences (Polypodiidae, Aspleniaceae) and its Implications for Biogeography.**

In: Systematic Botany 29 (2), p. 260–274. DOI: 10.1600/036364404774195476.

**SCHULZE, G.; TREUTLEIN, JENS; WINK, MICHAEL (2001):**

**Phylogenetic Relationships between *Asplenium bourgaei* (Boiss.) Milde and *A. jahandiezii* (Litard.) Rouy inferred from morphological Characters and *rbcl* Sequences.**

In: Plant Biology 3, p. 364–371.

**SHEPHERD, LARA D.; HOLLAND, BARBARA R.; PERRIE, LEON R. (2008):**

**Conflict amongst Chloroplast DNA Sequences obscures the Phylogeny of a Group of *Asplenium* Ferns.**

In: Molecular Phylogenetics and Evolution 48 (1), p. 176–187. DOI: 10.1016/j.ympev.2008.02.023.

**YATABE, YOKO; MASUYAMA, SHIGEO; DARNAEDI, DEDY; MURAKAMI, NORIAKI (2001):**

**Molecular Systematics of the *Asplenium nidus* Complex from Mt. Halimun National Park, Indonesia: Evidence for reproductive Isolation among three sympatric *Rbcl* Sequence Types.**

In: American Journal of Botany 88 (8), p. 1517–1522.

## **Asteliaceae**

**BIRCH, JOANNE L. (2015):**

**A Revision of infrageneric Classification in *Astelia* Banks & Sol. ex R.Br. (Asteliaceae).**

In: PhytoKeys (52), p. 105–132. DOI: 10.3897/phytokeys.52.4768.

**BIRCH, JOANNE L.; KEELEY, STERLING C.; MORDEN, CLIFFORD W. (2012):**

**Molecular Phylogeny and dating of Asteliaceae (Asparagales): *Astelia* s.l. Evolution provides Insight into the Oligocene History of New Zealand.**

In: Molecular Phylogenetics and Evolution 65 (1), p. 102–115. DOI: 10.1016/j.ympev.2012.05.031.

## **Asteraceae**

- ALTINORDU, FAHIM; MARTIN, ESRA; HAMZAOĞLU, ERGIN; ÇETIN, ÖZLEM (2014):**  
**New Chromosome counts, karyotype Analyses and asymmetry Indices in some Taxa of Genus *Senecio* L. and related Genera *Tephrosieris* (Rchb.) Rchb. and *Turanecio* Hamzaoglu belong to Tribe Senecioneae (Asteraceae) from Turkey.**  
In: *Plant Systematics and Evolution* 300 (10), p. 2205–2216. DOI: 10.1007/s00606-014-1042-8.
- ANDERBERG, ARNE A. (2005):**  
**Evolutionary Relationships in the Asteraceae Tribe Inuleae (incl. Plucheeae) Evidenced by DNA Sequences of *ndhF*; with Notes on the systematic Positions of some aberrant Genera.**  
In: *Organisms Diversity and Evolution* 5 (2), p. 135–146. DOI: 10.1016/j.ode.2004.10.015.
- ANDRÉS-SÁNCHEZ, SANTIAGO; TEMSCH, EVA M.; RICO, ENRIQUE; MONTSERRAT MARTÍNEZ-ORTEGA, MARIA (2013):**  
**Genome Size in *Filago* L. (Asteraceae, Gnaphalieae) and related Genera: phylogenetic, evolutionary and ecological Implications.**  
In: *Plant Systematics and Evolution* 299 (2), p. 331–345. DOI: 10.1007/s00606-012-0724-3.
- ARCHIBALD, JENNY K.; CRAWFORD, DANIEL J.; SANTOS-GUERRA, ARNOLDO; MORT, MARK E. (2006):**  
**The utility of automated Analysis of inter-simple Sequence Repeat (Issr) Loci for resolving Relationships in the Canary Island Species of *Tolpis* (Asteraceae).**  
In: *American Journal of Botany* 93 (8), p. 1154–1162. DOI: 10.3732/ajb.93.8.1154.
- BAIN, J. F.; GOLDEN, J. L. (2000):**  
**A Phylogeny of *Packera* (Senecioneae; asteraceae) based on Internal Transcribed Spacer Region Sequence Data and a broad Sampling of Outgroups.**  
In: *Molecular Phylogenetics and Evolution* 16 (3), p. 331–338. DOI: 10.1006/mpev.2000.0804.
- BAIRD, KRISTEN E.; FUNK, VICKI A.; WEN, JUN; WEEKS, ANDREA (2010):**  
**Molecular phylogenetic Analysis of *Leibnitzia* Cass. (Asteraceae: Mutisieae: *Gerbera*-complex), an Asian-North American disjunct Genus.**  
In: *Journal of Systematics and Evolution* 48 (3), p. 161–174. DOI: 10.1111/j.1759-6831.2010.00077.x.
- BALDWIN, BRUCE G.; WESSA, BRIDGET L. (2000):**  
**Origin and Relationships of the tarweed-silversword Lineage (Compositae-Madiinae).**  
In: *American Journal of Botany* 87 (12), p. 1890–1908. DOI: 10.2307/2656841.
- BARKER, NIGEL P.; HOWIS, SERANNE; NORDENSTAM, BERTIL; KÄLLERSJÖ, MARI; ELDENÄS, PIA K.; GRIFFIOEN, C.; LINDER, HANS PETER (2009):**  
**Nuclear and Chloroplast DNA-based Phylogenies of *Chrysanthemoides* Tourn. ex Medik. (Calenduleae; Asteraceae) reveal extensive incongruence and generic Paraphyly, but support the Recognition of infraspecific Taxa in *C. monilifera*.**  
In: *South African Journal of Botany* 75 (3), p. 560–572. DOI: 10.1016/j.sajb.2009.05.006.
- BARRES, LAIA; SANMARTÍN, ISABEL; ANDERSON, CAJSA LISA; SUSANNA, ALFONSO; BUERKI, SVEN; GALBANY-CASALS, MERCÈ; VILATERSANA, ROSER (2013):**  
**Reconstructing the Evolution and biogeographic History of Tribe Cardueae (Compositae).**  
In: *American Journal of Botany* 100 (5), p. 867–882. DOI: 10.3732/ajb.1200058.
- BAYER, RANDALL J.; CROSS, E. W. (2003):**  
**A reassessment of tribal Affinities of *Cratystylis* and *Haegiela* (Asteraceae) based on three Chloroplast DNA Sequences.**  
In: *Plant Systematics and Evolution* 236 (3-4), p. 207–220. DOI: 10.1007/s00606-002-0233-x.

- BAYER, RANDALL J.; PUTTOCK, CHRISTOPHER F.; KELCHNER, SCOT A. (2000):**  
**Phylogeny of South African Gnaphalieae (Asteraceae) based on two noncoding Chloroplast Sequences.**  
In: American Journal of Botany 87 (2), p. 259–272. DOI: 10.2307/2656914.
- BEAN, A. R. (2013):**  
**Reinstatement and Revision of *Sphaeromorphaea* DC. and *Ethuliopsis* F.Muell. (Asteraceae: Plucheinae).**  
In: Austrobaileya 9 (1), p. 30–59.
- BECK, JAMES B.; NESOM, GUY L.; CALIE, PATRICK J.; BAIRD, GARY I.; SMALL, RANDALL L.; SCHILLING, EDWARD E. (2004):**  
**Is Subtribe Solidagininae (Asteraceae) monophyletic?**  
In: Taxon 53 (3), p. 691–698.
- BENGTSON, ANNIKA; ANDERBERG, ARNE A.; KARIS, PER OLA (2011):**  
**Phylogeny and Generic Delimitation of the *Metalasia* Clade (Asteraceae-Gnaphalieae).**  
In: International Journal of Plant Sciences 172 (8), p. 1067–1075. DOI: 10.1086/661294.
- BENGTSON, ANNIKA; ANDERBERG, ARNE A.; KARIS, PER OLA (2014):**  
**Phylogeny and Evolution of the South African Genus *Metalasia* (Asteraceae-Gnaphalieae) inferred from molecular and morphological Data.**  
In: Botanical Journal of the Linnean Society 174 (2), p. 173–198. DOI: 10.1111/boj.12114.
- BENTLEY, JOANNE; KLAASSEN, ESMERALDA S.; BERGH, NICOLA G. (2015):**  
***Philyrophyllum* (Asteraceae) transferred from Gnaphalieae to Athroismeae based on phylogenetic Analysis of nuclear and Plastid DNA Sequence Data.**  
In: Taxon 64 (5), p. 975–986. DOI: 10.12705/645.7.
- BERGH, NICOLA G.; LINDER, HANS PETER (2009):**  
**Cape Diversification and repeated out-of-southern-Africa Dispersal in paper daisies (Asteraceae-Gnaphalieae).**  
In: Molecular Phylogenetics and Evolution 51 (1), p. 5–18. DOI: 10.1016/j.ympev.2008.09.001.
- BERGH, NICOLA G.; TRISOS, CHRISTOPHER H.; VERBOOM, GEORGE ANTHONY (2011):**  
**Phylogeny of the “*Ifloga* Clade” (Asteraceae, Gnaphalieae), a Lineage occurring disjointly in the Northern and Southern Hemisphere, and inclusion of *Trichogyne* in Synonymy with *Ifloga*.**  
In: Taxon 60 (4), p. 1065–1075.
- BERGH, NICOLA G.; VERBOOM, GEORGE ANTHONY (2011):**  
**Anomalous Capitulum Structure and Monoecy may confer Flexibility in sex Allocation and life History Evolution in the *Ifloga* Lineage of Paper Daisies (Compositae: Gnaphalieae).**  
In: American Journal of Botany 98 (7), p. 1113–1127. DOI: 10.3732/ajb.1000457.
- BLÖCH, CORDULA; DICKORÉ, W. BERNHARD; SAMUEL, L.; STUESSY, TOD F. (2010):**  
**Molecular Phylogeny of the Edelweiss (*Leontopodium*, Asteraceae – Gnaphalieae).**  
In: Edinburgh Journal of Botany 67 (02), p. 235–264. DOI: 10.1017/S0960428610000065.
- BLÖCH, CORDULA; WEISS-SCHNEEWEISS, HANNA; SCHNEEWEISS, GERALD M.; BARFUSS, MICHAEL H. J.; REBERNIG, CAROLIN A.; VILLASEÑOR, JOSÉ LUIS; STUESSY, TOD F. (2009):**

**Molecular phylogenetic Analyses of nuclear and Plastid DNA Sequences support  
dyploid and polyploid Chromosome Number Changes and reticulate Evolution in  
the Diversification of *Melampodium* (Millerieae, Asteraceae).**

In: Molecular Phylogenetics and Evolution 53 (1), p. 220–233. DOI: 10.1016/j.ympev.2009.02.021.

**BONIFACINO, JOSÉ MAURICIO; FUNK, VICKI A. (2012):**

**Phylogenetics of the *Chilotrichum* Group (Compositae: Astereae): the Story of the  
fascinating Radiation in the paleate Astereae Genera from Southern South America.**

In: Taxon 61 (1), p. 180–196.

**BORŠIĆ, IGOR; SUSANNA, ALFONSO; BANCHEVA, SVETLANA; GARCIA-JACAS, NÚRIA (2011):**

***Centaurea* Sect. *Cyanus* : Nuclear Phylogeny, Biogeography, and Life-Form Evolution.**

In: International Journal of Plant Sciences 172 (2), p. 238–249. DOI: 10.1086/657645.

**BOWLES, VICTORIA G.; MAYERHOFER, REINHOLD; DAVIS, COREY; GOOD, ALLEN G.; HALL, JOCELYN C. (2010):**

**A phylogenetic Investigation of *Carthamus* combining Sequence and microsatellite  
Data.**

In: Plant Systematics and Evolution 287 (1-2), p. 85–97. DOI: 10.1007/s00606-010-0292-3.

**BREITWIESER, ILSE; GLENNY, DAVID S.; THORNE, ANITA; WAGSTAFF, STEVEN J. (1999):**

**Phylogenetic Relationships in Australasian Gnaphalieae (Compositae) inferred from  
ITS Sequences.**

In: New Zealand Journal of Botany 37 (3), p. 399–412. DOI: 10.1080/0028825X.1999.9512644.

**BROUILLET, LUC; ANDERBERG, ARNE A.; NESOM, GUY L.; LOWREY, TIMOTHY K.; URBATSCH, LOWELL E. (2009):**

***Welwitschiella* is a member of the African Subtribe Grangeinae (Asteraceae  
Astereae): a new phylogenetic Position based on *ndh* and ITS Sequence Data.**

In: Kew Bulletin 64, p. 645–660.

**CALVO, JOEL; ÁLVAREZ, INÉS; AEDO, CARLOS; PELSER, PIETER B. (2013):**

**A phylogenetic Analysis and new Delimitation of *Senecio* Sect. *Crociseris*  
(Compositae: Senecioneae), with Evidence of intergeneric Hybridization.**

In: Taxon 62 (1), p. 127–140.

**CARIAGA, KATHLEEN A.; PRUSKI, JOHN F.; OVIEDO, RAMONA; ANDERBERG, ARNE A.; LEWIS, CARL E.; FRANCISCO-  
ORTEGA, JAVIER (2008):**

**Phylogeny and Systematic Position of *Feddea* (Asteraceae: Feddeae): a  
Taxonomically enigmatic and critically endangered Genus endemic to Cuba.**

In: Systematic Botany 33 (1), p. 193–202. DOI: 10.1600/036364408783887348.

**CHAN, RAYMUND; BALDWIN, BRUCE G.; ORNDUFF, ROBERT (2001):**

**Goldfields revisited: a molecular phylogenetic Perspective on the Evolution of  
*Lasthenia* (Compositae: Heliantheae sensu lato).**

In: International Journal of Plant Sciences 162 (6), p. 1347–1360.

**CLEVINGER, JENNIFER A.; PANERO, JOSE L. (2000):**

**Phylogenetic Analysis of *Silphium* and Subtribe Engelmanniinae (Asteraceae:  
Heliantheae) based on ITS and ETS Sequence Data.**

In: American Journal of Botany 87 (4), p. 565–572. DOI: 10.2307/2656600.

**COLEMAN, MAX; LISTON, AARON; KADEREIT, JOACHIM W.; ABBOTT, RICHARD J. (2003):**

**Repeat intercontinental Dispersal and Pleistocene Speciation in disjunct  
Mediterranean and desert *Senecio* (Asteraceae).**

In: American Journal of Botany 90 (10), p. 1446–1454. DOI: 10.3732/ajb.90.10.1446.

- COSTA, CLAYTON M. (2014):**  
**A molecular Phylogeny of the Golden Asters, Subtribe Chrysopsidinae (Asteraceae: Astereae), based on nuclear ribosomal and Chloroplast Sequence Data.**  
 Master of Science in Biology. Towson University, Towson, Maryland, USA.
- CRAWFORD, D.J.; KIMBALL, R. T.; TADESSE, MESFIN (2001):**  
**The generic Placement of a morphologically enigmatic Species in Asteraceae: Evidence from ITS Sequences.**  
 In: Plant Systematics and Evolution 228, p. 63–69.
- CRAWFORD, DANIEL J.; MORT, MARK E. (2005):**  
**Phylogeny of Eastern North American *Coreopsis* (Asteraceae-Coreopsideae): Insights from nuclear and Plastid Sequences, and comments on Character Evolution.**  
 In: American Journal of Botany 92 (2), p. 330–336. DOI: 10.3732/ajb.92.2.330.
- CRON, GLYNIS V.; BALKWILL, KEVIN; KNOX, ERIC B. (2008):**  
**Phylogenetic Evidence for the generic Circumscription of *Cineraria* L. (Asteraceae-Senecioneae).**  
 In: Taxon 57 (3), p. 779–798.
- CROSS, E. W.; QUINN, CHRISTOPHER J.; WAGSTAFF, STEVEN J. (2002):**  
**Molecular Evidence for the Polyphyly of *Olearia* (Astereae: Asteraceae).**  
 In: Plant Systematics and Evolution 235 (1), p. 99–120. DOI: 10.1007/s00606-002-0198-9.
- CRUZ-MAZO, G.; BUIDE, M. L.; SAMUEL, L.; NARBONA, E. (2009):**  
**Molecular Phylogeny of *Scorzoneroides* (Asteraceae): Evolution of heterocarpy and annual Habit in unpredictable Environments.**  
 In: Molecular Phylogenetics and Evolution 53 (3), p. 835–847. DOI: 10.1016/j.ympev.2009.08.001.
- DENDA, T.; WATANABE, K.; KOSUGE, KEIKO; YAHARA, T.; ITO, MOTOMI (1999):**  
**Molecular Phylogeny of *Brachyscome* (Asteraceae).**  
 In: Plant Systematics and Evolution 217 (217), p. 299–311.
- DEVOS, NICOLAS; BARKER, NIGEL P.; NORDENSTAM, BERTIL; MUCINA, LADISLAV (2010):**  
**A multi-locus Phylogeny of *Euryops* (Asteraceae, Senecioneae) augments Support for the “Cape to Cairo” Hypothesis of Floral Migrations in Africa.**  
 In: Taxon 59 (1), p. 57–67.
- DIAZGRANADOS, MAURICIO (2012):**  
**A Nomenclator for the Frailejones (Espeletiinae Cuatrec., Asteraceae).**  
 In: PhytoKeys (16), p. 1–52. DOI: 10.3897/phytokeys.16.3186.
- EKENÄS, CATARINA; BALDWIN, BRUCE G.; ANDREASEN, KATARINA (2007):**  
**A molecular phylogenetic Study of *Arnica* (Asteraceae): Low Chloroplast DNA Variation and problematic subgeneric Classification.**  
 In: Systematic Botany 32 (4), p. 917–928.
- EKENÄS, CATARINA; HEIDARI, NAHID; ANDREASEN, KATARINA (2012):**  
***Arnica* (Asteraceae) Phylogeny revisited using RPB2: complex Patterns and multiple d-Paralogues.**  
 In: Molecular Phylogenetics and Evolution 64 (2), p. 261–270. DOI: 10.1016/j.ympev.2012.02.032.
- ELDENÄS, PIA K.; KÄLLERSJÖ, MARI; ANDERBERG, ARNE A. (1999):**  
**Phylogenetic Placement and Circumscription of Tribes Inuleae s. str. and Plucheeae (Asteraceae): Evidence from Sequences of Chloroplast Gene ndhF.**

In: *Molecular Phylogenetics and Evolution* 13 (1), p. 50–58.

**ELDENS, PIA; ANDERBERG, ARNE A.; KLLERSJ, MARI (1998):**

**Molecular Phylogenetics of the Tribelnuleae s. str. (Asteraceae), based on ITS Sequences of nuclear ribosomal DNA.**

In: *Plant Systematics and Evolution* 210 (3-4), p. 159–173. DOI: 10.1007/BF00985666.

**ENGLUND, MARKUS; PORNPONGRUNGRUENG, PIMWADEE; GUSTAFSSON, MATS H.G.; ANDERBERG, ARNE A. (2009):**

**Phylogenetic Relationships and generic Delimitation in Inuleae Subtribe Inulinae (Asteraceae) based on ITS and cpDNA Sequence Data.**

In: *Cladistics* 25 (4), p. 319–352. DOI: 10.1111/j.1096-0031.2009.00256.x.

**ENKE, NEELA; GEMEINHOLZER, BIRGIT (2008):**

**Babcock revisited: new Insights into generic Delimitation and Character Evolution in *Crepis* L. (Compositae: Cichorieae) from ITS and matK Sequence Data.**

In: *Taxon* 57 (3), p. 756–768.

**ENKE, NEELA; GEMEINHOLZER, BIRGIT; ZIDORN, CHRISTIAN (2012):**

**Molecular and phytochemical Systematics of the Subtribe Hypochaeridinae (Asteraceae, Cichorieae).**

In: *Organisms Diversity and Evolution* 12 (1), p. 1–16. DOI: 10.1007/s13127-011-0064-0.

**ESSELMAN, ELIZABETH J.; CRAWFORD, DANIEL J.; BRAUNER, SOREN; STUESSY, TOD F.; ANDERSON, GREGORY J.; SILVA O, MARIO (2000):**

**Rapid marker Diversity within and Divergence among Species of *Dendroseris* (Asteraceae: Lactuceae).**

In: *American Journal of Botany* 87 (4), p. 591–596. DOI: 10.2307/2656603.

**FEHLBERG, SHANNON D.; RANKER, TOM A. (2007):**

**Phylogeny and Biogeography of *Encelia* (Asteraceae) in the Sonoran and Peninsular Deserts based on multiple DNA Sequences.**

In: *Systematic Botany* 32 (3), p. 692–699. DOI: 10.1600/036364407782250689.

**FEHRER, JUDITH; GEMEINHOLZER, BIRGIT; CHRTEK, JINDRICH; BRÄUTIGAM, SIEGFRIED (2007):**

**Incongruent Plastid and nuclear DNA Phylogenies reveal ancient intergeneric Hybridization in *Pilosella* hawkweeds (*Hieracium*, Cichorieae, Asteraceae).**

In: *Molecular Phylogenetics and Evolution* 42 (2), p. 347–361. DOI: 10.1016/j.ympev.2006.07.004.

**FERNÁNDEZ, I. A.; AGUILAR, J. F.; PANERO, JOSE L.; FELINER, G. N. (2001):**

**A phylogenetic Analysis of *Doronicum* (Asteraceae, Senecioneae) based on morphological, nuclear ribosomal (ITS), and Chloroplast (trnL-F) Evidence.**

In: *Molecular Phylogenetics and Evolution* 20 (1), p. 41–64. DOI: 10.1006/mpev.2001.0954.

**FERREIRA, MARIA ZITA; ZAHRADNÍČEK, JAROSLAV; KADLECOVÁ, JANA; SEQUEIRA, MIGUEL MENEZES; CHRTEK JR., JINDŘICH; FEHRER, JUDITH (2015):**

**Tracing the evolutionary History of the little-known Mediterranean-Macaronesian Genus *Andryala* (Asteraceae) by multigene Sequencing.**

In: *Taxon* 64 (3), p. 535–551. DOI: 10.12705/643.10.

**FLAGEL, LEX E.; RAPP, RYAN A.; GROVER, CORRINNE E.; WIDRLECHNER, MARK P.; HAWKINS, JENNIFER; GRAFENBERG, JESSIE L. ET AL. (2008):**

**Phylogenetic, morphological, and chemotaxonomic Incongruence in the North American endemic Genus *Echinacea*.**

In: *American Journal of Botany* 95 (6), p. 756–765. DOI: 10.3732/ajb.0800049.

- FLANN, CHRISTIAN; GREUTER, WERNER; HIND, D. NICHOLASJ. (2010):  
**Cassini's Compositae Genera: A nomenclatural and taxonomic Assessment.**  
In: *Taxon* 59 (4), p. 1206–1244.
- FONT, MÒNICA; GARCIA-JACAS, NÚRIA; VILATERSANA, ROSER; ROQUET, CRISTINA; SUSANNA, ALFONSO (2009):  
**Evolution and Biogeography of *Centaurea* Section *Acrocentron* inferred from nuclear and Plastid DNA Sequence Analyses.**  
In: *Annals of Botany* 103 (6), p. 985–997. DOI: 10.1093/aob/mcp022.
- FORD, KERRY A.; WARD, JOSEPHINE M.; SMISSEN, ROB D.O.B.; WAGSTAFF, STEVEN J.; BREITWIESER, ILSE (2007):  
**Phylogeny and Biogeography of *Craspedia* (Asteraceae: Gnaphalieae) based on ITS, ETS and psbA-trnH Sequence Data.**  
In: *Taxon* 56 (3), p. 783–794.
- FRANCISCO-ORTEGA, JAVIER; BARBER, JANET C.; SANTOS-GUERRA, ARNOLDO; FEBLES-HERNÁNDEZ, ROSA; JANSEN, ROBERT K. (2001):  
**Origin and Evolution of the endemic Genera of Gonosperminae (Asteraceae: Anthemideae) from the Canary Islands: Evidence from nucleotide Sequences of the internal transcribed Spacers of the nuclear ribosomal DNA.**  
In: *American Journal of Botany* 88 (1), p. 161–169. DOI: 10.2307/2657136.
- FREIRE, SUSANA EDITH (2007):  
**Systematic Revision and Phylogeny of *Ainsliaea* DC. (Asteraceae, Mutisieae) 1.**  
In: *Annals of the Missouri Botanical Garden* 94 (1), p. 79–191. DOI: 10.3417/0026-6493(2007)94[79:SRAPOA]2.0.CO;2.
- FREIRE, SUSANA EDITH; CHEMISQUY, MARIA AMELIA; ANDERBERG, ARNE A.; BECK, STEPHAN G.; MENESES, ROSA I.; LOEUILLE, BENOÎT; URTUBEY, ESTRELLA (2015):  
**The *Lucilia* Group (Asteraceae, Gnaphalieae): phylogenetic and taxonomic Considerations based on molecular and morphological Evidence.**  
In: *Plant Systematics and Evolution* 301 (4), p. 1227–1248. DOI: 10.1007/s00606-014-1147-0.
- FUNK, VICKI A.; CHAN, RAYMUND (2008):  
**Phylogeny of the Spiny African Daisies (Compositae, Tribe Arctotideae, Subtribe Gorteriinae) based on trnL-F, ndhF, and ITS Sequence Data.**  
In: *Molecular Phylogenetics and Evolution* 48 (1), p. 47–60. DOI: 10.1016/j.ympev.2008.03.035.
- FUNK, VICKI A.; CHAN, RAYMUND; KEELEY, STERLING C. (2004):  
**Insights into the Evolution of the Tribe Arctoteae (Compositae: Subfamily Cichorioideae s.s.) using trnL-F, ndhF, and ITS.**  
In: *Taxon* 53 (3), p. 637–655.
- FUNK, VICKI A.; KELLOFF, CAROL L.; CHAN, RAYMUND (2012):  
**Phylogeny and Biogeography of the Tribe Liabeae (Compositae Subfamily Cichorioideae).**  
In: *Taxon* 61 (2), p. 437–455.
- FUNK, VICKI A.; KOEKEMOER, MARINDA (2011):  
**A Monograph of the small Tribe Platycarpeae (Compositae: Cichorioideae).**  
In: *Systematic Botany* 36 (1), p. 191–208. DOI: 10.1600/036364411X553270.
- FUNK, VICKI A.; SANCHO, GISELA; ROQUE, NÁDIA; KELLOFF, CAROL L.; VENTOSA-RODRÍGUEZ, IRALYS; DIAZGRANADOS, MAURICIO ET AL. (2014):  
**A Phylogeny of the Gochnatieae: Understanding a critically placed Tribe in the Compositae.**

In: Taxon 63 (4), p. 859–882. DOI: 10.12705/634.27.

**FUNSTON, A. MICHELE (2008):**

**Taxonomic Revision of *Roldana* (Asteraceae: Senecioneae), a Genus of the Southwestern U.S.A., Mexico, and Central America.**

In: Annals of the Missouri Botanical Garden 95 (2), p. 282–337. DOI: 10.3417/2003151.

**GALBANY-CASALS, MERCÈ; ANDRÉS-SÁNCHEZ, SANTIAGO; GARCIA-JACAS, NÚRIA; SUSANNA, ALFONSO; RICO, ENRIQUE; MARTÍNEZ-ORTEGA, M. MONTSERRAT (2010):**

**How many of Cassini anagrams should there be? molecular Systematics and phylogenetic Relationships in the *Filago* Group (Asteraceae, Gnaphalieae), with special Focus on the Genus *Filago*.**

In: Taxon 59 (6), p. 1671–1689.

**GALBANY-CASALS, MERCÈ; GARCIA-JACAS, NÚRIA; SÁEZ, LLORENÇ; BENEDÍ, CARLES; SUSANNA, ALFONSO (2009):**

**Phylogeny, Biogeography, and Character Evolution in Mediterranean, Asiatic, and Macaronesian *Helichrysum* (Asteraceae, Gnaphalieae) inferred from Nuclear phylogenetic Analyses.**

In: International Journal of Plant Sciences 170 (3), p. 365–380. DOI: 10.1086/596332.

**GALBANY-CASALS, MERCÈ; UNWIN, MATTHEW M.; GARCIA-JACAS, NÚRIA; SMISSEN, ROB D.O.B.; SUSANNA, ALFONSO; BAYER, RANDALL J. (2014):**

**Phylogenetic Relationships in *Helichrysum* (Compositae: Gnaphalieae) and related Genera: Incongruence between nuclear and Plastid Phylogenies, biogeographic and morphological Patterns, and Implications for generic Delimitation.**

In: Taxon 63 (3), p. 608–624. DOI: 10.12705/633.8.

**GAO, TIAN-GANG; WANG, WEI; BAYER, RANDALL J.; LI, DE-ZHU (2009):**

**Systematic Position of the enigmatic Genus *Sheareria* (Asteraceae) - Evidence from molecular, morphological and cytological Data.**

In: Taxon 58 (3), p. 769–780.

**GARCIA, S.; GARNATJE, TERESA; HIDALGO, ORIANE; MCARTHUR, E. DURANT; SILJAK-YAKOVLEV, SONJA; VALLÈS, JOAN (2007):**

**Extensive ribosomal DNA (18s-5.8s-26s and 5s) Colocalization in the North American endemic sagebrushes (Subgenus *Tridentatae*, *Artemisia*, Asteraceae) revealed by Fish.**

In: Plant Systematics and Evolution 267 (1-4), p. 79–92. DOI: 10.1007/s00606-007-0558-6.

**GARCIA, SÒNIA; MCARTHUR, E. DURANT; PELLICER, JAUME; SANDERSON, STEWART C.; VALLÈS, JOAN; GARNATJE, TERESA (2011):**

**A molecular phylogenetic approach to western North America endemic *Artemisia* and allies (Asteraceae): untangling the sagebrushes.**

In: American Journal of Botany 98 (4), p. 638–653. DOI: 10.3732/ajb.1000386.

**GARCIA-JACAS, NÚRIA (2001):**

**Generic Delimitation and Phylogeny of the Subtribe Centaureinae (Asteraceae): A Combined Nuclear and Chloroplast DNA Analysis.**

In: Annals of Botany 87 (4), p. 503–515. DOI: 10.1006/anbo.2000.1364.

**GARCIA-JACAS, NÚRIA; GARNATJE, TERESA; SUSANNA, ALFONSO; VILATERSANA, ROSER (2002):**

**Tribal and subtribal Delimitation and Phylogeny of the Cardueae (Asteraceae): a combined nuclear and Chloroplast DNA Analysis.**

In: Molecular Phylogenetics and Evolution 22 (1), p. 51–64. DOI: 10.1006/mpev.2001.1038.



- GARCIA-JACAS, NÚRIA; SUSANNA, ALFONSO; MOZAFFARIAN, V.; ILARSLAN, R. (2000):**  
**The natural Delimitation of *Centaurea* (Asteraceae: Cardueae): ITS Sequence Analysis of the *Centaurea jacea* Group.**  
In: Plant Systematics and Evolution 223, p. 185–199.
- GARCIA-JACAS, NÚRIA; UYSAL, TUNA; ROMASCHENKO, KONSTANTIN; SUÁREZ-SANTIAGO, VÍCTOR N.; ERTUĞRUL, KUDDISI; SUSANNA, ALFONSO (2006):**  
***Centaurea* revisited: A molecular survey of the *Jacea* Group.**  
In: Annals of Botany 98 (4), p. 741–753. DOI: 10.1093/aob/mcl157.
- GASKIN, JOHN F.; WILSON, L. M. (2007):**  
**Phylogenetic Relationships among native and naturalized *Hieracium* (Asteraceae) in Canada and the United States based on Plastid DNA Sequences.**  
In: Systematic Botany 32 (2), p. 478–485. DOI: 10.1600/036364407781179752.
- GELETA, MULATU; BEKELE, ENDASHAW; DAGNE, KIFLE; BRYNGELSSON, TOMAS (2010):**  
**Phylogenetics and taxonomic Delimitation of the Genus *Guizotia* (Asteraceae) based on Sequences derived from various Chloroplast DNA Regions.**  
In: Plant Systematics and Evolution 289 (1-2), p. 77–89. DOI: 10.1007/s00606-010-0334-x.
- GELETA, MULATU; BRYNGELSSON, TOMAS; BEKELE, ENDASHAW; DAGNE, KIFLE (2007):**  
**Comparative Analysis of genetic Relationship and diagnostic Markers of several Taxa of *Guizotia* Cass. (Asteraceae) as revealed by AFLPs and RAPDs.**  
In: Plant Systematics and Evolution 265 (3-4), p. 221–239. DOI: 10.1007/s00606-007-0521-6.
- GOERTZEN, LESLIE R.; CANNONE, JAMIE J.; GUTELL, ROBIN R.; JANSEN, ROBERT K. (2003):**  
**ITS secondary Structure derived from comparative Analysis: Implications for Sequence Alignment and Phylogeny of the Asteraceae.**  
In: Molecular Phylogenetics and Evolution 29 (2), p. 216–234. DOI: 10.1016/S1055-7903(03)00094-0.
- GREINER, ROLAND; VOGT, ROBERT; OBERPRIELER, CHRISTOPH (2012):**  
**Phylogenetic studies in the polyploid complex of the Genus *Leucanthemum* Mill. (Compositae, Anthemideae) based on cpDNA Sequence Variation.**  
In: Plant Systematics and Evolution 298 (7), p. 1407–1414. DOI: 10.1007/s00606-012-0636-2.
- GROSSI, MARIANA A.; GUTIÉRREZ, DIEGO G.; BERRUETA, PEDRO C.; MARTÍNEZ, JUAN J. (2011):**  
***Acanthostyles* (Asteraceae, Eupatorieae): a Revision with a multivariate Analysis.**  
In: Australian Systematic Botany 24 (2), p. 87. DOI: 10.1071/SB10038.
- GRUENSTAEUDL, MICHAEL; SANTOS-GUERRA, ARNOLDO; JANSEN, ROBERT K. (2013):**  
**Phylogenetic Analyses of *Tolpis* Adans. (Asteraceae) reveal Patterns of adaptive Radiation, multiple Colonization and interspecific Hybridization.**  
In: Cladistics 29 (4), p. 416–434. DOI: 10.1111/cla.12005.
- GRUENSTAEUDL, MICHAEL; URTUBEY, ESTRELLA; JANSEN, ROBERT K.; SAMUEL, ROSABELLE; BARFUSS, MICHAEL H. J.; STUESSY, TOD F. (2009):**  
**Phylogeny of Barnadesioideae (Asteraceae) inferred from DNA Sequence Data and Morphology.**  
In: Molecular Phylogenetics and Evolution 51 (3), p. 572–587. DOI: 10.1016/j.ympev.2009.01.023.
- GÜLTEPE, MUTLU; COŞKUNÇELEBI, KAMIL; MAKBUL, SERDAR; SAĞLAM, COŞKUN (2015):**  
***Tragopogon turcicus* sp. nov. (Asteraceae) from Turkey and its phylogenetic Position.**  
In: Nordic Journal of Botany 33 (5), p. 540–547. DOI: 10.1111/njb.00851.
- GUO, YAN-PING; EHRENDORFER, FRIEDRICH; SAMUEL, ROSABELLE (2004):**

**Phylogeny and Systematics of *Achillea* (Asteraceae-Anthemideae) inferred from nrITS and Plastid trnL-F DNA Sequences.**

In: Taxon 53 (3), p. 657–672.

**HEIDEN, GUSTAVO (2013):**

**Two new Combinations in *Baccharis* (Asteraceae: Asterae).**

In: Phytoneuron 78, p. 1–2.

**HEIDEN, GUSTAVO; PIRANI, JOSÉ RUBENS (2012):**

**A Synopsis and Notes for *Baccharis* subgen. *Tarchonanthoides* (Asteraceae: Astereae).**

In: Phytotaxa 60, p. 41–49.

**HERSHKOVITZ, MARK A.; ARROYO, MARY T.K.; BELL, CHARLES D.; HINOJOSA, L. FELIPE (2006):**

**Phylogeny of *Chaetanthera* (Asteraceae: Mutisieae) reveals both ancient and recent Origins of the high Elevation Lineages.**

In: Molecular Phylogenetics and Evolution 41 (3), p. 594–605. DOI: 10.1016/j.ympev.2006.05.003.

**HIDALGO, ORIANE; GARCIA-JACAS, NÚRIA; GARNATJE, TERESA; ROMASCHENKO, KONSTANTIN; SUSANNA, ALFONSO; SILJAK-YAKOVLEV, SONJA (2008):**

**Extreme environmental conditions and phylogenetic Inheritance: Systematics of *Myopordon* and *Oligochaeta* (Asteraceae, Cardueae-Centaureinae).**

In: Taxon 57 (3), p. 769–778.

**HIDALGO, ORIANE; GARCIA-JACAS, NÚRIA; GARNATJE, TERESA; SUSANNA, ALFONSO (2006):**

**Phylogeny of *Rhaponticum* (Asteraceae, Cardueae-Centaureinae) and related Genera inferred from nuclear and Chloroplast DNA Sequence Data: taxonomic and biogeographic Implications.**

In: Annals of Botany 97 (5), p. 705–714. DOI: 10.1093/aob/mcl029.

**HILPOLD, ANDREAS; SCHÖNSWETTER, PETER; SUSANNA, ALFONSO; GARCIA-JACAS, NÚRIA; VILATERSANA, ROSER (2011):**

**Evolution of the central Mediterranean *Centaurea cineraria* Group (Asteraceae): Evidence for relatively recent, allopatric Diversification following transoceanic Seed Dispersal.**

In: Taxon 60 (2), p. 528–538.

**HILPOLD, ANDREAS; VILATERSANA, ROSER; SUSANNA, ALFONSO; MESEGUER, ANDREA SÁNCHEZ; BORŠIĆ, IGOR; CONSTANTINIDIS, THEOPHANIS ET AL. (2014):**

**Phylogeny of the *Centaurea* Group (*Centaurea*, Compositae) - Geography is a better Predictor than Morphology.**

In: Molecular Phylogenetics and Evolution 77, p. 195–215. DOI: 10.1016/j.ympev.2014.04.022.

**HIMMELREICH, SVEN; BREITWIESER, ILSE; OBERPRIELER, CHRISTOPH (2014):**

**Phylogenetic Relationships in the extreme polyploid complex of the New Zealand Genus *Leptinella* (Compositae: Anthemideae) based on AFLP Data.**

In: Taxon 63 (4), p. 883–898. DOI: 10.12705/634.19.

**HIMMELREICH, SVEN; BREITWIESER, ILSE; OBERPRIELER, CHRISTOPH (2012):**

**Phylogeny, Biogeography, and Evolution of sex Expression in the Southern Hemisphere Genus *Leptinella* (Compositae, Anthemideae).**

In: Molecular Phylogenetics and Evolution 65 (2), p. 464–481. DOI: 10.1016/j.ympev.2012.07.001.

**HIMMELREICH, SVEN; KÄLLERSJÖ, MARI; ELDENÄS, PIA K.; OBERPRIELER, CHRISTOPH (2008):**

**Phylogeny of Southern Hemisphere Compositae-Anthemideae based on nrDNA ITS and cpDNA ndhF Sequence Information.**

In: *Plant Systematics and Evolution* 272 (1-4), p. 131–153. DOI: 10.1007/s00606-007-0634-y.

**HOWIS, SERANNE; BARKER, NIGEL P.; MUCINA, LADISLAV (2009):**

**Globally grown, but poorly known: Species limits and Biogeography of *Gazania* Gaertn. (Asteraceae) inferred from Chloroplast and nuclear DNA Sequence Data.**

In: *Taxon* 58 (3), p. 871–882.

**ITO, MOTOMI; YAHARA, TETSUKAZU; KING, ROBERT M.; WATANABE, KUNIAKI; OSHITA, SANAE; YOKOYAMA, JUN U.N.; CRAWFORD, DANIEL J. (2000):**

**Molecular Phylogeny of Eupatorieae (Asteraceae) Estimated from cpDNA RFLP and its Implication for the Polyploid Origin Hypothesis of the Tribe.**

In: *Journal of Plant Research* 113, p. 91–96.

**JAFARI, FARZANEH; OSALOO, SHAHROKH KAZEMPOUR; MOZAFFARIAN, VALIOLLAH (2015):**

**Molecular Phylogeny of the Tribe Astereae (Asteraceae) in SW Asia based on nrDNA ITS and cpDNA psbA-trnH Sequences.**

In: *Willdenowia* 45 (1), p. 77–92. DOI: 10.3372/wi.45.45108.

**JANSEN, ROBERT K.; HOLSINGER, KENT E.; MICHAELS, HELEN J.; PALMER, JEFFREY D. (1990):**

**Phylogenetic Analysis of Chloroplast DNA Restriction site Data at higher taxonomic Levels: an Example from the Asteraceae.**

In: *Evolution* 44 (8), p. 2089–2105.

**KARAMAN-CASTRO, VESNA; URBATSCH, LOWELL E. (2009):**

**Phylogeny of *Hinterhubera* Group and related Genera (Hinterhuberinae: Astereae) based on the nrDNA ITS and ETS Sequences.**

In: *Systematic Botany* 34 (4), p. 805–817. DOI: 10.1600/036364409790139772.

**KARIS, PER OLA (2006):**

**Morphological Data indicates two major Clades of the Subtribe Gorteriinae (Asteraceae-Arctotideae).**

In: *Cladistics* 22, p. 199–221.

**KATINAS, LILIANA; CRISCI, JORGE V.; JABAILY, RACHEL SCHMIDT; WILLIAMS, CODY; WALKER, JAY B.; DREW, BRYAN T. ET AL. (2008):**

**Evolution of secondary heads in Nassauviinae (Asteraceae, Mutisieae).**

In: *American Journal of Botany* 95 (2), p. 229–240. DOI: 10.3732/ajb.95.2.229.

**KATINAS, LILIANA; SANCHO, GISELA; VITALI, MAIRA SOLEDAD (2013):**

**A Revision of *Lophopappus* (Asteraceae, Nassauvieae).**

In: *Phytotaxa* 103 (1), p. 25. DOI: 10.11646/phytotaxa.103.1.2.

**KEELEY, STERLING C.; FORSMAN, ZAC H.; CHAN, RAYMUND (2007):**

**A Phylogeny of the "Evil Tribe" (Vernonieae: Compositae) reveals Old/New World long distance Dispersal: support from separate and combined congruent Datasets (trnL-F, ndhF, ITS).**

In: *Molecular Phylogenetics and Evolution* 44 (1), p. 89–103. DOI: 10.1016/j.ympev.2006.12.024.

**KIM, H.-G.; FUNK, VICKI A.; VLASAK, A.; ZIMMER, ELIZABETH A. (2003):**

**A Phylogeny of the Munnoziinae (Asteraceae, Liabeae): Circumscription of *Munnozia* and a new Placement of *M. perfoliata*.**

In: *Plant Systematics and Evolution* 239 (3-4), p. 171–185. DOI: 10.1007/s00606-003-0003-4.

- KIM, SEUNG-CHUL; CHUNGHEE, LEE; MEJÍAS, JOSÉ A. (2007):**  
**Phylogenetic Analysis of Chloroplast DNA matK Gene and ITS of nrDNA Sequences reveals Polyphyly of the Genus *Sonchus* and new Relationships among the Subtribe Sonchinae (Asteraceae: Cichorieae).**  
In: *Molecular Phylogenetics and Evolution* 44 (2), p. 578–597. DOI: 10.1016/j.ympev.2007.03.014.
- KIM, SEUNG-CHUL; CRAWFORD, DANIEL J.; JANSEN, ROBERT K.; SANTOS-GUERRA, ARNOLDO (1999):**  
**The use of a non-coding Region of Chloroplast DNA in phylogenetic Studies of the Subtribe Sonchinae (Asteraceae: Lactuceae).**  
In: *Plant Systematics and Evolution* 215, p. 85–99.
- KIM, SEUNG-CHUL; LU, CHRISTINA T.; LEPSCHI, BRENDAN J. (2004):**  
**Phylogenetic Positions of *Actites megalocarpa* and *Sonchus hydrophilus* (Sonchinae: Asteraceae) based on ITS and Chloroplast non-coding DNA Sequences.**  
In: *Australian Systematic Botany* 17 (1), p. 73. DOI: 10.1071/SB03019.
- KIMBALL, REBECCA T.; CRAWFORD, DANIEL J. (2004):**  
**Phylogeny of Coreopsideae (Asteraceae) using ITS Sequences suggests Lability in reproductive Characters.**  
In: *Molecular Phylogenetics and Evolution* 33 (1), p. 127–139. DOI: 10.1016/j.ympev.2004.04.022.
- KIMBALL, REBECCA T.; CRAWFORD, DANIEL J.; SMITH, EDWIN B. (2003):**  
**Evolutionary Processes in the Genus *Coreocarpus*: Insights from molecular Phylogenetics.**  
In: *Evolution* 57 (1), p. 52–61.
- KIRSCHNER, JAN; ZÁVESKÁ DRÁBKOVÁ, LENKA; ŠTĚPÁNEK, JAN; UHLEMANN, INGO (2015):**  
**Towards a better Understanding of the *Taraxacum* Evolution (Compositae–Cichorieae) on the basis of nrDNA of sexually reproducing Species.**  
In: *Plant Systematics and Evolution* 301 (4), p. 1135–1156. DOI: 10.1007/s00606-014-1139-0.
- KITA, YOKO; FUJIKAWA, KAZUMI; ITO, MOTOMI; OHBA, HIDEAKI; KATO, MASAHIRO (2004):**  
**Molecular phylogenetic Analyses and Systematics of the Genus *Saussurea* and related Genera (Asteraceae, Cardueae).**  
In: *Taxon* 53 (3), p. 679–690.
- KOEKEMOER, MARINDA (2016):**  
**A monograph of *Stoebe* and *Seriphium* (Gnaphalieae, Asteraceae) in southern Africa and neighbouring Islands.**  
In: *Phytotaxa* 242 (1), p. 1. DOI: 10.11646/phytotaxa.242.1.1.
- KONISHI, N.; WATANABE, K.; KOSUGE, KEIKO (2000):**  
**Molecular Systematics of Australian *Podolepis* (Asteraceae: Gnaphalieae): Evidence from DNA Sequences of the nuclear ITS Region and the Chloroplast matK Gene.**  
In: *Australian Systematic Botany* 13 (5), p. 709. DOI: 10.1071/SB99030.
- KONOWALIK, KAMIL; WAGNER, FLORIAN; TOMASELLO, SALVATORE; VOGT, ROBERT; OBERPRIELER, CHRISTOPH (2015):**  
**Detecting reticulate Relationships among diploid *Leucanthemum* Mill. (Compositae, Anthemideae) Taxa using multilocus Species Tree Reconstruction Methods and AFLP Fingerprinting.**  
In: *Molecular Phylogenetics and Evolution* 92, p. 308–328. DOI: 10.1016/j.ympev.2015.06.003.
- KOOPMAN, WIM J. M.; GUETTA, ELI; VAN DE WIEL, CLEMENS C. M.; VOSMAN, BEN; VAN DEN BERG, RONALD G. (1998):**

- Phylogenetic Relationships among *Lactuca* (Asteraceae) Species and related Genera based on ITS-1 DNA Sequences.**  
In: American Journal of Botany 85 (11), p. 1517–1530. DOI: 10.2307/2446479.
- KOOPMAN, WIM J. M.; ZEVENBERGEN, MARTIN J.; VAN DEN BERG, RONALD G. (2001):  
Species Relationships in *Lactuca* s.l. (Lactuceae, Asteraceae) inferred from AFLP Fingerprints.**  
In: American Journal of Botany 88 (10), p. 1881–1887. DOI: 10.2307/3558364.
- KORNKVEN, AMY B.; WATSON, LINDA E.; ESTES, JAMES R. (1998):  
Phylogenetic Analysis of *Artemisia* Section *Tridentatae* (Asteraceae) based on Sequences from the internal transcribed Spacers (ITS) of nuclear ribosomal DNA.**  
In: American Journal of Botany 85 (12), p. 1787–1795. DOI: 10.2307/2446513.
- LEE, CHUNGHEE; KIM, SEUNG-CHUL; LUNDY, KAREN; SANTOS-GUERRA, ARNOLDO (2005):  
Chloroplast DNA Phylogeny of the woody *Sonchus* alliance (Asteraceae: Sonchinae) in the Macaronesian Islands.**  
In: American Journal of Botany 92 (12), p. 2072–2085. DOI: 10.3732/ajb.92.12.2072.
- LEE, JOONGKU; BALDWIN, BRUCE G.; GOTTLIEB, L. D. (2002):  
Phylogeny of *Stephanomeria* and related Genera (Compositae-Lactuceae) based on Analysis of 18s-26s nuclear rDNA ITS and ETS Sequences.**  
In: American Journal of Botany 89 (1), p. 160–168. DOI: 10.3732/ajb.89.1.160.
- LEE, JOONGKU; BALDWIN, BRUCE G.; GOTTLIEB, L. D. (2003):  
Phylogenetic Relationships among the Primarily North American Genera of Cichorieae (Compositae) based on Analysis of 18s–26s Nuclear rDNA ITS and ETS Sequences.**  
In: Systematic Botany 28 (3), p. 616–626.
- LI, WEI-PING; QIAN, FENG-MING; YANG, XIU-LIN; CHEN, SAN-MAO (2014):  
Systematic Position of *Cyathocline* Cass. (Asteraceae): Evidences from molecular, cytological and morphological Data.**  
In: Plant Systematics and Evolution 300 (4), p. 595–606. DOI: 10.1007/s00606-013-0905-8.
- LI, WEI-PING; YANG, FU-SHENG; JIVKOVA, TODORKA; YIN, GEN-SHEN (2012):  
Phylogenetic Relationships and generic Delimitation of Eurasian *Aster* (Asteraceae: Astereae) inferred from ITS, ETS and trnL-F Sequence Data.**  
In: Annals of Botany 109 (7), p. 1341–1357. DOI: 10.1093/aob/mcs054.
- LIU, HONG; TRUSTY, JENNIFER; OVIEDO, RAMONA; ANDERBERG, ARNE A.; FRANCISCO-ORTEGA, JAVIER (2004):  
Molecular Phylogenetics of the Caribbean Genera *Rhodogeron* and *Sachsia* (Asteraceae).**  
In: International Journal of Plant Sciences 165 (1), p. 209–217.
- LIU, JIAN-QUAN; GAO, TIAN-GANG; CHEN, ZHI-DUAN; LU, AN-MING (2002):  
Molecular Phylogeny and Biogeography of the Qinghai-Tibet Plateau endemic *Nannoglottis* (Asteraceae).**  
In: Molecular Phylogenetics and Evolution 23, p. 307–325.
- LIU, JIAN-QUAN; WANG, YU-JING; WANG, AI-LAN; HIDEAKI, OHBA; ABBOTT, RICHARD J. (2006):  
Radiation and Diversification within the *Ligularia-Cremanthodium-Parasenecio* complex (Asteraceae) triggered by Uplift of the Qinghai-Tibetan Plateau.**  
In: Molecular Phylogenetics and Evolution 38 (1), p. 31–49. DOI: 10.1016/j.ympev.2005.09.010.

- LIU, YING; CHEN, YOU-SHENG; YANG, QIN-ER (2013):  
**Generic status, Circumscription, and allopolyploid Origin of *Faberia* (Asteraceae: Cichorieae) as revealed by ITS and Chloroplast DNA Sequence Data.**  
In: *Taxon* 62 (6), p. 1235–1247. DOI: 10.12705/626.14.
- LIU, YING; YANG, QIN-ER (2011):  
**Cytology and its systematic Implications in *Sinosenecio* (Senecioneae-Asteraceae) and two closely related Genera.**  
In: *Plant Systematics and Evolution* 291 (1-2), p. 7–24. DOI: 10.1007/s00606-010-0365-3.
- LO PRESTI, ROSA MARIA; OPPOLZER, STEPHANIE; OBERPRIELER, CHRISTOPH (2012):  
**A molecular Phylogeny and a revised Classification of the Mediterranean Genus *Anthemis* s.l. (Compositae, Anthemideae) based on three molecular Markers and micromorphological characters.**  
In: *Taxon* 59 (5), p. 1441–1456.
- LOEUILLE, BENOÎT FRANCIS PATRICE (2011):  
**Towards a phylogenetic Classification of Lychnophorinae (Asteraceae: Vernonieae).**  
Universidade de São Paulo, São Paulo.
- LOEUILLE, BENOÎT; SEMIR, JOÃO; LOHMANN, LÚCIA GARCES; PIRANI, JOSÉ RUBENS (2015):  
**A phylogenetic Analysis of Lychnophorinae (Asteraceae: Vernonieae) based on molecular and morphological Data.**  
In: *Systematic Botany* 40 (1), p. 299–315. DOI: 10.1600/036364415X686585.
- LOOCKERMAN, DENNIS J.; TURNER, BILLIE L.; JANSEN, ROBERT K. (2003):  
**Phylogenetic Relationships within the Tageteae (Asteraceae) based on Nuclear Ribosomal ITS and Chloroplast *ndhF* Gene Sequences.**  
In: *Systematic Botany* 28 (1), p. 191–207.
- LÓPEZ-VINYALLONGA, SARA; LÓPEZ-PUJOL, JORDI; CONSTANTINIDIS, THEOPHANIS; SUSANNA, ALFONSO; GARCIA-JACAS, NÚRIA (2015):  
**Mountains and Refuges: Genetic Structure and evolutionary History in closely related, endemic *Centaurea* in continental Greece.**  
In: *Molecular Phylogenetics and Evolution* 92, p. 243–254. DOI: 10.1016/j.ympev.2015.06.018.
- LÓPEZ-VINYALLONGA, SARA; MEHREGAN, IRAJ; GARCIA-JACAS, NÚRIA; TSCHERNEVA, OLGA; SUSANNA, ALFONSO; KADEREIT, JOACHIM W. (2009):  
**Phylogeny and Evolution of the *Arctium-Cousinia* Complex (Compositae, Cardueae-Carduinae).**  
In: *Taxon* 58 (1), p. 153–171.
- LÓPEZ-VINYALLONGA, SARA; ROMASCHENKO, KONSTANTIN; SUSANNA, ALFONSO; GARCIA-JACAS, NÚRIA (2011):  
**Systematics of the Arctioid Group: Disentangling *Arctium* and *Cousinia* (Cardueae, Carduinae).**  
In: *Taxon* 60 (2), p. 539–554.
- LOWREY, TIMOTHY K.; QUINN, CHRISTOPHER J.; TAYLOR, RACHAEL K.; CHAN, RAYMUND; KIMBALL, REBECCA T.; NARDI, JAN C. (2001):  
**Molecular and morphological Reassessment of Relationships within the *Vittadinia* Group of Astereae (Asteraceae).**  
In: *American Journal of Botany* 88 (7), p. 1279–1289. DOI: 10.2307/3558339.
- LOWREY, TIMOTHY K.; WHITKUS, RICHARD; SYKES, WILLIAM R. (2005):

- A new Species of *Tetramolopium* (Asteraceae) from Mitiaro, Cook Islands: Biogeography, phylogenetic Relationships, and Dispersal.**  
In: Systematic Botany 30 (2), p. 448–455.
- LUEBERT, FEDERICO; WEN, JUN; DILLON, MICHAEL O. (2009):**  
**Systematic Placement and biogeographical Relationships of the monotypic Genera *Gypothamnium* and *Oxyphyllum* (Asteraceae: Mutisioideae) from the Atacama Desert.**  
In: Botanical Journal of the Linnean Society 159, p. 32–51.
- LYU, MING-JU AMY; GOWIK, UDO; KELLY, STEVE; COVSHOFF, SARAH; MALLMANN, JULIA; WESTHOFF, PETER ET AL. (2015):**  
**RNA-Seq based Phylogeny recapitulates previous Phylogeny of the Genus *Flaveria* (Asteraceae) with some modifications.**  
In: BMC Evolutionary Biology 15, p. 116. DOI: 10.1186/s12862-015-0399-9.
- MAGEE, ANTHONY RICHARD; NICOLAS, ANTOINE N.; TILNEY, PATRICIA M.; PLUNKETT, GREGORY M. (2015):**  
**Phylogenetic Relationships and generic Realignments in the early Diverging Subtribe *Pentziinae* (Asteraceae, Anthemideae).**  
In: Botanical Journal of the Linnean Society 178 (4), p. 633–647. DOI: 10.1111/boj.12295.
- MAKBUL, SERDAR; COŞKUNÇELEBI, KAMIL; GÜLTEPE, MUTLU; OKUR, SEDA; GÜZEL, MURAT ERDEM (2012):**  
***Scorzonera ahmet-duranii* sp. nov. (Asteraceae) from southwest Anatolia, and its phylogenetic Position.**  
In: Nordic Journal of Botany 30 (1), p. 2–11. DOI: 10.1111/j.1756-1051.2011.01235.x.
- MALINSKA, HANA; TATE, JENNIFER A.; MATYASEK, ROMAN; LEITCH, ANDREW R.; SOLTIS, DOUGLAS E.; SOLTIS, PAMELA S.; KOVARIK, ALES (2010):**  
**Similar Patterns of rDNA Evolution in synthetic and recently formed natural Populations of *Tragopogon* (Asteraceae) Allotetraploids.**  
In: BMC Evolutionary Biology 10, p. 291. DOI: 10.1186/1471-2148-10-291.
- MANDEL, JENNIFER R.; DIKOW, REBECCA B.; FUNK, VICKI A. (2015):**  
**Using phylogenomics to resolve Mega-families: An example from Compositae.**  
In: Journal of Systematics and Evolution 53 (5), p. 391–402. DOI: 10.1111/jse.12167.
- MARANER, FABRIZIO; SAMUEL, ROSABELLE; STUESSY, TOD F.; CRAWFORD, DANIEL J.; CRISCI, JORGE V.; PANDEY, ARUN KUMAR; MORT, MARK E. (2012):**  
**Molecular Phylogeny of *Nassauvia* (Asteraceae, Mutisieae) based on nrDNA ITS Sequences.**  
In: Plant Systematics and Evolution 298 (2), p. 399–408. DOI: 10.1007/s00606-011-0553-9.
- MARKOS, STACI; BALDWIN, BRUCE G. (2002):**  
**Structure, molecular Evolution, and phylogenetic Utility of the 50 Region of the external transcribed spacer of 18s-26s rDNA in *Lessingia* (Compositae, Astereae).**  
In: Molecular Phylogenetics and Evolution 23, p. 214–228.
- MARLOWE, K.; HUFFORD, LARRY (2007):**  
**Taxonomy and Biogeography of *Gaillardia* (Asteraceae): A phylogenetic Analysis.**  
In: Systematic Botany 32 (1), p. 208–226. DOI: 10.1600/036364407780360229.
- MARTINS, LUDWIG.; HELLWIG, FRANK H. (2005):**  
**Phylogenetic Relationships of the enigmatic Species *Serratula chinensis* and *Serratula forrestii* (Asteraceae - Cardueae).**  
In: Plant Systematics and Evolution 255 (3-4), p. 215–224. DOI: 10.1007/s00606-005-0342-4.

- MARTINS, LUDWIG; HELLWIG, FRANK H. (2005):**  
**Systematic Position of the Genera *Serratula* and *Klasea* within Centaureinae (Cardueae, Asteraceae) inferred from ETS and ITS Sequence Data and new Combinations in *Klasea*.**  
 In: Taxon 54 (3), p. 632–638.
- MASON, CHASE M.; DONOVAN, LISA A. (2015):**  
**Evolution of the Leaf economics Spectrum in Herbs: Evidence from Environmental Divergences in Leaf Physiology across *Helianthus* (Asteraceae).**  
 In: Evolution 69 (10), p. 2705–2720. DOI: 10.1111/evo.12768.
- MAVRODIEV, EVGENY V.; EDWARDS, CHRISTINE E.; ALBACH, DIRK C.; GITZENDANNER, MATTHEW A.; SOLTIS, PAMELA S.; SOLTIS, DOUGLAS E. (2004):**  
**Phylogenetic Relationships in Subtribe Scorzonerinae (Asteraceae: Cichorioideae: Cichorieae) based on ITS Sequence Data.**  
 In: Taxon 53 (3), p. 699–712.
- MAVRODIEV, EVGENY V.; SOLTIS, PAMELA S.; SOLTIS, DOUGLAS E. (2008):**  
**Putative parentage of six Old World polyploids in *Tragopogon* L. (Asteraceae: Scorzonerinae) based on ITS, ETS, and Plastid Sequence Data.**  
 In: Taxon 57 (4), p. 1215–1232.
- MAVRODIEV, EVGENY V.; TANCIG, MARK; SHERWOOD, ANNA M.; GITZENDANNER, MATTHEW A.; ROCCA, JENNIFER; SOLTIS, PAMELA S.; SOLTIS, DOUGLAS E. (2005):**  
**Phylogeny of *Tragopogon* L. (Asteraceae) based on internal and external transcribed spacer Sequence Data.**  
 In: International Journal of Plant Sciences 166 (1), p. 117–133.
- McKENZIE, ROBERT J.; BARKER, NIGEL P. (2008):**  
**Radiation of southern African daisies: biogeographic Inferences for Subtribe Arctotidinae (Asteraceae, Arctotideae).**  
 In: Molecular Phylogenetics and Evolution 49 (1), p. 1–16. DOI: 10.1016/j.ympev.2008.07.007.
- McKENZIE, ROBERT J.; MULLER, ELIZABETH M.; SKINNER, AMY K. W.; KARIS, PER OLA; BARKER, NIGEL P. (2006):**  
**Phylogenetic Relationships and generic Delimitation in Subtribe Arctotidinae (Asteraceae: Arctotideae) inferred by DNA Sequence Data from ITS and five Chloroplast Regions.**  
 In: American Journal of Botany 93 (8), p. 1222–1235. DOI: 10.3732/ajb.93.8.1222.
- McKOWN, ATHENA D.; MONCALVO, JEAN-MARC; DENGLER, NANCY G. (2005):**  
**Phylogeny of *Flaveria* (Asteraceae) and Inference of C4 Photosynthesis Evolution.**  
 In: American Journal of Botany 92 (11), p. 1911–1928. DOI: 10.3732/ajb.92.11.1911.
- MESSINA, ANDRE; WALSH, NEVILLE G.; HOEBEE, SUSAN E.; GREEN, PETER T. (2014):**  
**A Revision of *Olearia* Section *Asterotriche* (Asteraceae: Asterae).**  
 In: Australian Systematic Botany 27 (3), p. 199. DOI: 10.1071/SB14012.
- MILTON, JOSEPH J. (2009):**  
**Phylogenetic Analyses and taxonomic Studies of Senecioninae: Southern African *Senecio* Section *Senecio*.**  
 Dissertation. University of St. Andrews, UK.
- MITSUI, YUKI; CHEN, SHAO-TIEN; ZHOU, ZHE-KUN; PENG, CHING-I.; DENG, YUN-FEI; SETOGUCHI, HIROAKI (2008):**



**Phylogeny and Biogeography of the Genus *Ainsliaea* (Asteraceae) in the Sino-Japanese Region based on nuclear rDNA and Plastid DNA Sequence Data.**

In: *Annals of Botany* 101 (1), p. 111–124. DOI: 10.1093/aob/mcm267.

**MITSUI, YUKI; SETOGUCHI, HIROAKI (2012):**

**Demographic histories of adaptively diverged riparian and non-riparian Species of *Ainsliaea* (Asteraceae) inferred from coalescent Analyses using multiple nuclear Loci.**

In: *BMC Evolutionary Biology* 12, p. 254. DOI: 10.1186/1471-2148-12-254.

**MITSUI, YUKI; SETOGUCHI, HIROAKI (2012):**

**Recent Origin and adaptive Diversification of *Ainsliaea* (Asteraceae) in the Ryukyu Islands: molecular phylogenetic Inference using nuclear microsatellite Markers.**

In: *Plant Systematics and Evolution* 298 (5), p. 985–996. DOI: 10.1007/s00606-012-0608-6.

**MONTES-MORENO, NOEMÍ; SÁEZ, LLORENÇ; BENEDÍ, CARLES; SUSANNA, ALFONSO; GARCIA-JACAS, NÚRIA (2010):**

**Generic delineation, Phylogeny and subtribal affinities of *Phagnalon* and *Aliella* (Compositae, Gnaphalieae) based on nuclear and Chloroplast Sequences.**

In: *Taxon* 59 (6), p. 1654–1670.

**MOODY, MICHAEL L.; RIESEBERG, LOREN H. (2012):**

**Sorting through the chaff, nDNA Gene Trees for phylogenetic Inference and hybrid Identification of annual Sunflowers (*Helianthus* Sect. *Helianthus*).**

In: *Molecular Phylogenetics and Evolution* 64 (1), p. 145–155. DOI: 10.1016/j.ympev.2012.03.012.

**MOORE, ABIGAIL J.; BARTOLI, ADRIANA; TORTOSA, ROBERTO D.; BALDWIN, BRUCE G. (2012):**

**Phylogeny, Biogeography, and Chromosome Evolution of the amphitropical Genus *Grindelia* (Asteraceae) inferred from nuclear ribosomal and Chloroplast Sequence Data.**

In: *Taxon* 61 (1), p. 211–230.

**MOORE, ABIGAIL J.; BOHS, LYNN (2003):**

**An ITS Phylogeny of *Balsamorhiza* and *Wyethia* (Asteraceae: Heliantheae).**

In: *American Journal of Botany* 90 (11), p. 1653–1660. DOI: 10.3732/ajb.90.11.1653.

**MOORE, ABIGAIL J.; BOHS, LYNN (2007):**

**Phylogeny of *Balsamorhiza* and *Wyethia* (Asteraceae: Heliantheae) using ITS, ETS, and trnK Sequence Data.**

In: *Systematic Botany* 32 (3), p. 682–691. DOI: 10.1600/036364407782250661.

**MOORE, MICHAEL J.; FRANCISCO-ORTEGA, JAVIER; SANTOS-GUERRA, ARNOLDO; JANSEN, ROBERT K. (2002):**

**Chloroplast DNA Evidence for the Roles of Island Colonization and Extinction in *Tolpis* (Asteraceae: Lactuceae).**

In: *American Journal of Botany* 89 (3), p. 518–526. DOI: 10.3732/ajb.89.3.518.

**MORAN, EMILY; FUNK, VICKI A. (2006):**

**A Revision of *Erato* (Compositae: Liabeae).**

In: *Systematic Botany* 31 (3), p. 597–609. DOI: 10.1600/036364406778388728.

**MORGAN, DAVID R.; KORN, RANDI-LYNN; MUGLESTON, SPENCER L. (2009):**

**Insights into reticulate Evolution in Machaerantherinae (Asteraceae: Astereae): 5s ribosomal RNA Spacer Variation, estimating Support for Incongruence, and Constructing reticulate Phylogenies.**

In: *American Journal of Botany* 96 (5), p. 920–932. DOI: 10.3732/ajb.0800308.

- MORT, MARK E.; CRAWFORD, DANIEL J.; SANTOS-GUERRA, ARNOLDO; FRANCISCO-ORTEGA, JAVIER; ESSELMAN, ELIZABETH J.; WOLFE, ANDREA D. (2003):**  
**Relationships among the Macaronesian members of *Tolpis* (Asteraceae: Lactuceae) based upon Analyses of inter simple Sequence repeat (ISSR) Markers.**  
 In: *Taxon* 52, p. 511–518.
- MORT, MARK E.; RANDLE, CHRISTOPHER P.; KIMBALL, REBECCA T.; TADESSE, MESFIN; CRAWFORD, DANIEL J. (2008):**  
**Phylogeny of Coreopsidae (Asteraceae) inferred from nuclear and Plastid DNA Sequences.**  
 In: *Taxon* 57 (1), p. 109–120.
- MOURA, MÓNICA; SILVA, LUÍS; DIAS, ELISABETE F.; SCHAEFER, HANNO; CARINE, MARK A. (2015):**  
**A Revision of the Genus *Leontodon* (Asteraceae) in the Azores based on morphological and molecular Evidence.**  
 In: *Phytotaxa* 210 (1), p. 24. DOI: 10.11646/phytotaxa.210.1.4.
- NIE, ZE-LONG; FUNK, VICKI A.; SUN, HANG; DENG, TAO; MENG, YING; WEN, JUN (2013):**  
**Molecular Phylogeny of *Anaphalis* (Asteraceae, Gnaphalieae) with biogeographic Implications in the Northern Hemisphere.**  
 In: *Journal of Plant Research* 126 (1), p. 17–32. DOI: 10.1007/s10265-012-0506-6.
- NOMURA, NAOFUMI; TAKASO, TOKUSHIRO; PENG, CHING-I.; KONO, YOSHIKO; OGINUMA, KAZUO; MITSUI, YUKI; SETOGUCHI, HIROAKI (2010):**  
**Molecular Phylogeny and habitat Diversification of the Genus *Farfugium* (Asteraceae) based on nuclear rDNA and Plastid DNA.**  
 In: *Annals of Botany* 106 (3), p. 467–482. DOI: 10.1093/aob/mcq139.
- NYLINDER, STEPHAN; ANDERBERG, ARNE A. (2015):**  
**Phylogeny of the Inuleae (Asteraceae) with special Emphasis on the Inuleae-Plucheinae.**  
 In: *Taxon* 64 (1), p. 110–130. DOI: 10.12705/641.22.
- NYLINDER, STEPHAN; CRONHOLM, BODIL; LANGE, PETER J.; WALSH, NEVILLE G.; ANDERBERG, ARNE A. (2013):**  
**Species Tree Phylogeny and Character Evolution in the Genus *Centipeda* (Asteraceae): Evidence from DNA Sequences from coding and non-coding loci from the Plastid and nuclear Genomes.**  
 In: *Molecular Phylogenetics and Evolution* 68 (2), p. 239–250. DOI: 10.1016/j.ympev.2013.03.020.
- OBERPRIELER, CHRISTOPH (2002):**  
**A phylogenetic Analysis of *Chamaemelum* Mill. (Compositae: Anthemideae) and related Genera based upon nrDNA ITS and cpDNA trnL/trnF Igs Sequence Variation.**  
 In: *Botanical Journal of the Linnean Society* 138, p. 255–273.
- OBERPRIELER, CHRISTOPH (2005):**  
**Temporal and spatial Diversification of Circum-Mediterranean Compositae-Anthemideae.**  
 In: *Taxon* 54 (4), p. 951–966.
- OBERPRIELER, CHRISTOPH; VOGT, ROBERT (2000):**  
**The Position of *Castrilanthemum* Vogt & Oberprieler and the Phylogeny of Mediterranean Anthemideae (Compositae) as inferred from nrDNA ITS and cpDNA trnL/trnF Igs Sequence Variation.**  
 In: *Plant Systematics and Evolution* 225, p. 145–170.

- OBERPRIELER, CHRISTOPH; VOGT, ROBERT (2006):**  
**The taxonomic Position of *Matricaria macrotis* (Compositae-Anthemideae).**  
In: Willdenowia 36 (1), p. 329–338. DOI: 10.3372/wi.36.36128.
- ORCHARD, A. E. (2004):**  
**A reassessment of the Genus *Haeckeria* (Asteraceae: Gnaphalieae), with Definition of new Species in *Cassinia*.**  
In: Australian Systematic Botany 17 (5), p. 447. DOI: 10.1071/SB04021.
- ORCHARD, A. E. (2009):**  
**A Revision of *Cassinia* (Asteraceae: Gnaphalieae) in Australia. 6. Section *Cassinia*.**  
In: Australian Systematic Botany 22 (5), p. 344. DOI: 10.1071/SB09018.
- ORTIZ, SANTIAGO; CARBAJAL, RODRIGO; SERRANO, MIGUEL; RODRÍGUEZ-OUBIÑA, JUAN; IGLESIAS, ISABEL (2013):**  
**Phylogeny of the African Mutisieae s.l. (Asteraceae) based on ndhF and trnL-F Sequences (cpDNA).**  
In: Taxon 62 (3), p. 525–536. DOI: 10.12705/623.11.
- PANERO, JOSE L.; FREIRE, SUSANA EDITH; ARIZA ESPINAR, LUIS; CROZIER, BONNIE S.; BARBOZA, GLORIA ESTELA; CANTERO, JUAN J. (2014):**  
**Resolution of deep Nodes yields an improved Backbone Phylogeny and a new basal Lineage to Study early Evolution of Asteraceae.**  
In: Molecular Phylogenetics and Evolution 80, p. 43–53. DOI: 10.1016/j.ympev.2014.07.012.
- PANERO, JOSE L.; FUNK, VICKI A. (2008):**  
**The value of Sampling anomalous Taxa in phylogenetic Studies: major Clades of the Asteraceae revealed.**  
In: Molecular Phylogenetics and Evolution 47 (2), p. 757–782. DOI: 10.1016/j.ympev.2008.02.011.
- PANERO, JOSE L.; JANSEN, ROBERT K.; CLEVINGER, JENNIFER A. (1999):**  
**Phylogenetic Relationships of Subtribe Ecliptinae (Asteraceae: Heliantheae) based on Chloroplast DNA restriction site Data.**  
In: American Journal of Botany 86 (3), p. 413–427. DOI: 10.2307/2656762.
- PARK, SEON-JOO; KOROMPAI, E.J.; FARNCSICO-ORTEGA, J.; SANTOS-GUERRA, ARNOLDO; JANSEN, ROBERT K. (2001):**  
**Phylogenetic Relationships of *Tolpis* (Asteraceae: Lactuceae) based on ndhF Sequence Data.**  
In: Plant Systematics and Evolution 226, p. 23–33.
- PEIRSON, JESS A.; REZNICEK, ANTON A.; SEMPLE, JOHN C. (2012):**  
**Polyploidy, infraspecific cytotype Variation, and Speciation in Goldenrods: the Cytogeography of *Solidago* subSect. *Humiles* (Asteraceae) in North America.**  
In: Taxon 61 (1), p. 197–210.
- PELLICER, JAUME; VALLÈS, JOAN; KOROBKOV, ALEKSANDR A.; GARNATJE, TERESA (2011):**  
**Phylogenetic Relationships of *Artemisia* Subg. *Dracunculus* (Asteraceae) based on ribosomal and Chloroplast DNA Sequences.**  
In: Taxon 60 (3), p. 691–704.
- PELSE, PIETER B.; KENNEDY, AARON H.; TEPE, ERIC J.; SHIDLER, JACOB B.; NORDENSTAM, BERTIL; KADEREIT, JOACHIM W.; WATSON, LINDA E. (2010):**  
**Patterns and causes of incongruence between Plastid and nuclear Senecioneae (Asteraceae) Phylogenies.**  
In: American Journal of Botany 97 (5), p. 856–873. DOI: 10.3732/ajb.0900287.

- PELSER, PIETER B.; NORDENSTAM, BERTIL; KADEREIT, JOACHIM W.; WATSON, LINDA E. (2007):  
**An ITS Phylogeny of Tribe Senecioneae (Asteraceae) and a new Delimitation of *Senecio* L.**  
In: *Taxon* 56 (4), p. 1077–1104.
- PENG, YU-LAN; ZHANG, YU; GAO, XIN-FEN; TONG, LIN-JING; LI, LIANG; LI, REN-YUAN ET AL. (2014):  
**A phylogenetic Analysis and new Delimitation of *Crepidiastrum* (Asteraceae, Tribe Cichorieae).**  
In: *Phytotaxa* 159 (4), p. 241. DOI: 10.11646/phytotaxa.159.4.1.
- PLOVANICH, ANNE E.; PANERO, JOSE L. (2004):  
**A Phylogeny of the ITS and ETS for *Montanoa* (Asteraceae: Heliantheae).**  
In: *Molecular Phylogenetics and Evolution* 31 (3), p. 815–821. DOI: 10.1016/j.ympev.2003.10.021.
- PORNONGRUNGRUENG, PIMWADEE; BORCHSENIUS, FINN; ENGLUND, MARKUS; ANDERBERG, ARNE A.; GUSTAFSSON, MATS H.G. (2007):  
**Phylogenetic Relationships in *Blumea* (Asteraceae: Inuleae) as Evidenced by molecular and morphological Data.**  
In: *Plant Systematics and Evolution* 269 (3-4), p. 223–243. DOI: 10.1007/s00606-007-0581-7.
- PORNONGRUNGRUENG, PIMWADEE; BORCHSENIUS, FINN; GUSTAFSSON, MATS H.G. (2009):  
**Relationships within *Blumea* (Inuleae, Asteraceae) and the utility of the 5s-NTS in species-level Phylogeny Reconstruction.**  
In: *Taxon* 58 (4), p. 1181–1193.
- RANJBAR, MASSOUD; NEGARESH, KAZEM (2013):  
**A Revision of *Centaurea* Sect. *Phaeopappus* (Asteraceae, Cardueae).**  
In: *Phytotaxa* 123 (1), p. 1. DOI: 10.11646/phytotaxa.123.1.1.
- RAUSCHER, JASON T. (2002):  
**Molecular Phylogenetics of the *Espeletia* Complex (Asteraceae): Evidence from nrDNA ITS Sequences on the closest Relatives of an Andean adaptive Radiation.**  
In: *American Journal of Botany* 89 (7), p. 1074–1084. DOI: 10.3732/ajb.89.7.1074.
- REPLINGER, MIRIAM; JOHANNESSEN, J.; SEITZ, A.; COMES, HANS PETER (2007):  
**Morphological and molecular Evidence for Hybridization and introgression in Central European *Arctium* (Asteraceae).**  
In: *Plant Systematics and Evolution* 268 (1-4), p. 75–95. DOI: 10.1007/s00606-007-0547-9.
- RIGGINS, CHANCE W.; SEIGLER, DAVID P. (2012):  
**The Genus *Artemisia* (Asteraceae: Anthemideae) at a continental Crossroads: molecular Insights into Migrations, Disjunctions, and Reticulations among Old and New World Species from a Beringian Perspective.**  
In: *Molecular Phylogenetics and Evolution* 64 (3), p. 471–490. DOI: 10.1016/j.ympev.2012.05.003.
- RIVERA, VANESSA LOPES; PANERO, JOSE L.; SCHILLING, EDWARD E.; CROZIER, BONNIE S.; MORAES, MARTA DIAS (2016):  
**Origins and recent Radiation of Brazilian Eupatorieae (Asteraceae) in the eastern Cerrado and Atlantic Forest.**  
In: *Molecular Phylogenetics and Evolution* 97, p. 90–100. DOI: 10.1016/j.ympev.2015.11.013.
- RIVERO-GUERRA, AIXA O.; LAURIN, MICHEL (2012):  
**Phylogenetic Analysis of the *Santolina rosmarinifolia* Aggregate (Asteraceae: Anthemideae: Santolininae) based on morphological Characteristics.**  
In: *Nordic Journal of Botany* 30 (5), p. 533–545. DOI: 10.1111/j.1756-1051.2011.01382.x.

- ROBBA, L.; CARINE, MARK A.; RUSSELL, STEPHEN J.; RAIMONDO, F. M. (2005):  
**The Monophyly and Evolution of *Cynara* L. (Asteraceae) sensu lato: Evidence from the Internal Transcribed Spacer Region of nrDNA.**  
In: *Plant Systematics and Evolution* 253 (1-4), p. 53–64. DOI: 10.1007/s00606-004-0259-3.
- ROBERTS, ROLAND P. (2002):  
**Phylogeny of *Ericameria*, *Chrysothamnus* and related Genera (Asteraceae: Astereae) based on Nuclear Ribosomal DNA Sequence Data.**  
Dissertation. Louisiana State University.
- ROBERTS, ROLAND P.; URBATSCH, LOWELL E. (2003):  
**Molecular Phylogeny of *Ericameria* (Asteraceae, Astereae) based on nuclear ribosomal 3 ETS and ITS Sequence Data.**  
In: *Taxon* 52, p. 209–228.
- ROBINSON, HAROLD ERNEST (1999):  
**Generic and subtribal Classification of American Vernonieae.**  
Washington, D.C.: Smithsonian Institution Press.
- ROBINSON, HAROLD ERNEST; FUNK, VICKI A. (2011):  
**A new Genus, *Nothovernonia*, from tropical Africa (Asteraceae or Compositae, Vernonieae).**  
In: *PhytoKeys* (3), p. 21–34. DOI: 10.3897/phytokeys.3.1131.
- ROBINSON, HAROLD ERNEST; SKVARLA, JOHN J.; FUNK, VICKI A. (2016):  
**Vernonieae (Asteraceae) of southern Africa: A generic DisPosition of the Species and a Study of their pollen.**  
In: *PhytoKeys* (60), p. 49–126. DOI: 10.3897/phytokeys.60.6734.
- ROQUE, NÁDIA; AFONSO SANTANA, FERNANDA (2014):  
**A new Species for a monotypic Genus: *Anteremanthus* (Asteraceae: Vernonieae).**  
In: *Systematic Botany* 39 (2), p. 656–661. DOI: 10.1600/036364414X680771.
- SAFER, STEFAN; TREMETSBERGER, KARIN; GUO, YAN-PING; KOHL, GUDRUN; SAMUEL, MARY R.; STUESSY, TOD F.; STUPPNER, HERMANN (2011):  
**Phylogenetic Relationships in the Genus *Leontopodium* (Asteraceae: Gnaphalieae) based on AFLP Data.**  
In: *Botanical Journal of the Linnean Society* 165 (4), p. 364–377. DOI: 10.1111/j.1095-8339.2011.01117.x.
- SALOMÓN, LUCIANA; HERNÁNDEZ, MARCELO PAULO; GIUGLIANO, DANIEL ALEJANDRO; FREIRE, SUSANA EDITH (2016):  
**Floral Microcharacters in South American Species of *Senecio* s.str. (Asteraceae) with considerations on the Circumscription of this Genus.**  
In: *Phytotaxa* 244 (1), p. 1. DOI: 10.11646/phytotaxa.244.1.1.
- SAMUEL, ROSABELLE; GUTERMANN, WALTER; STUESSY, TOD F.; RUAS, CLAUDETE DE FÁTIMA; LACK, HANS-WALTER; TREMETSBERGER, KARIN ET AL. (2006):  
**Molecular Phylogenetics reveals *Leontodon* (Asteraceae, Lactuceae) to be diphyletic.**  
In: *American Journal of Botany* 93 (8), p. 1193–1205. DOI: 10.3732/ajb.93.8.1193.
- SAMUEL, ROSABELLE; STUESSY, TOD F.; TREMETSBERGER, KARIN; BAEZA, CARLOS M.; SILJAK-YAKOVLEV, SONJA (2003):  
**Phylogenetic Relationships among Species of *Hypochaeris* (Asteraceae, Cichorieae) based on ITS, Plastid trnL Intron, trnL-F spacer, and matK Sequences.**  
In: *American Journal of Botany* 90 (3), p. 496–507. DOI: 10.3732/ajb.90.3.496.
- SÁNCHEZ-JIMÉNEZ, ISMAEL; LAZKOV, GEORGY A.; HIDALGO, ORIANE; GARNATJE, TERESA (2010):

- Molecular Systematics of *Echinops* L. (Asteraceae, Cynareae): A Phylogeny based on ITS and trnL-trnF Sequences with Emphasis on Sectional Delimitation.**  
In: *Taxon* 59 (3), p. 698–708.
- SANCHO, GISELA; KARAMAN-CASTRO, VESNA (2008):**  
**A phylogenetic Study in American Podocominae (Asteraceae: Astereae) based on morphological and molecular Data.**  
In: *Systematic Botany* 33 (4), p. 762–775. DOI: 10.1600/036364408786500262.
- SANCHO, GISELA; KATINAS, LILIANA; PLOS, ANABELA (2014):**  
**Is Morphology supporting a monophyletic *Proustia* Lag., (Nassauvieae, Asteraceae)?**  
In: *Plant Systematics and Evolution* 300 (10), p. 2265–2276. DOI: 10.1007/s00606-014-1052-6.
- SANTIAGO, LOUIS S.; KIM, SEUNG-CHUL (2009):**  
**Correlated Evolution of Leaf Shape and Physiology in the Woody *Sonchus* Alliance (Asteraceae: Sonchinae) in Macaronesia.**  
In: *International Journal of Plant Sciences* 170 (1), p. 83–92. DOI: 10.1086/593044.
- SANZ, MARÍA; VILATERSANA, ROSER; HIDALGO, ORIANE; GARCIA-JACAS, NÚRIA; SUSANNA, ALFONSO; SCHNEEWEISS, GERALD M.; VALLÈS, JOAN (2008):**  
**Molecular Phylogeny and Evolution of Floral Characters of *Artemisia* and Allies (Anthemideae, Asteraceae): Evidence from nrDNA ETS and ITS Sequences.**  
In: *Taxon* 57 (1), p. 66–78.
- SCHAEFER, HANNO (2015):**  
**On the Origin and systematic Position of the Azorean goldenrod, *Solidago azorica* (Asteraceae).**  
In: *Phytotaxa* 210 (1), p. 47. DOI: 10.11646/phytotaxa.210.1.5.
- SCHILLING, EDWARD E. (2011):**  
**Hybrid Genera in Liatrinae (Asteraceae: Eupatorieae).**  
In: *Molecular Phylogenetics and Evolution* 59 (1), p. 158–167. DOI: 10.1016/j.ympev.2011.01.011.
- SCHILLING, EDWARD E.; PANERO, JOSE L. (2010):**  
**Transfers to *Simsia* and Description of *Davilanthus*, a new Genus of Asteraceae (Heliantheae).**  
In: *Brittonia* 62 (4), p. 309–320.
- SCHILLING, EDWARD E.; PANERO, JOSE L. (2011):**  
**A revised Classification of Subtribe Helianthinae (Asteraceae: Heliantheae) II. Derived Lineages.**  
In: *Botanical Journal of the Linnean Society* 167, p. 311–331.
- SCHILLING, EDWARD E.; PANERO, JOSE L.; COX, PATRICIA B. (1999):**  
**Chloroplast DNA restriction site Data support a narrowed interpretation of *Eupatorium* (Asteraceae).**  
In: *Plant Systematics and Evolution* 219, p. 209–223.
- SCHILLING, EDWARD E.; PANERO, JOSE L.; CROZIER, BONNIE S.; SCOTT, RANDALL W.; DÁVILA, PATRICIA (2015):**  
**Brickbush (*Brickellia*) Phylogeny reveals Dimensions of the great Asteraceae Radiation in Mexico.**  
In: *Molecular Phylogenetics and Evolution* 85, p. 161–170. DOI: 10.1016/j.ympev.2015.02.007.
- SCHMIDT, GREGORY J.; SCHILLING, EDWARD E. (2000):**

**Phylogeny and Biogeography of *Eupatorium* (Asteraceae: Eupatorieae) based on nuclear ITS Sequence Data.**

In: American Journal of Botany 87 (5), p. 716–726. DOI: 10.2307/2656858.

**SCHMIDT-LEBUHN, ALEXANDER N.; BRUHL, JEREMY J.; TELFORD, IAN R.H.; WILSON, PAUL G. (2015):  
Phylogenetic Relationships of *Coronidium*, *Xerochrysum* and several neglected Australian Species of "*Helichrysum*" (Asteraceae: Gnaphalieae).**

In: Taxon 64 (1), p. 96–109. DOI: 10.12705/641.5.

**SCHMIDT-LEBUHN, ALEXANDER N.; CONSTABLE, LEE (2013):  
Phylogenetic Relationships of the Australasian shrubby Everlastings *Ozothamnus* and *Cassinia* (Asteraceae: Asteroideae: Gnaphalieae).**

In: Cladistics 29 (6), p. 574–588. DOI: 10.1111/cl.12007.

**SEHGAL, DEEPMALA; RAINA, SOOM NATH; DEVARUMATH, RACHHAYA M.; SASAKUMA, TETSUO (2009):  
Nuclear DNA Assay in solving issues related to Ancestry of the domesticated diploid Safflower (*Carthamus tinctorius* L.) and the polyploid (*Carthamus*) taxa, and phylogenetic and genomic Relationships in the Genus *Carthamus* L. (Asteraceae).**

In: Molecular Phylogenetics and Evolution 53 (3), p. 631–644. DOI: 10.1016/j.ympev.2009.07.012.

**SIMPSON, BERYL B.; ARROYO, MARY T.K.; SIPE, SANDRA; DIAS DE MORAES, MARTA; MCDILL, JOSHUA R. (2009):  
Phylogeny and Evolution of *Perezia* (Asteraceae: Mutisieae: Nassauviinae).**

In: Journal of Systematics and Evolution 47 (5), p. 431–443. DOI: 10.1111/j.1759-6831.2009.00039.x.

**SMISSEN, ROB D.O.B.; BREITWIESER, I.; WARD, JOSEPHINE M. (2004):  
Phylogenetic Implications of trans-specific Chloroplast DNA Sequence Polymorphism in New Zealand Gnaphalieae (Asteraceae).**

In: Plant Systematics and Evolution 249 (1-2), p. 37–53. DOI: 10.1007/s00606-004-0209-0.

**SOARES, POLYANA NORONHA (2012):  
Taxonomia de *Acilepidopsis*, *Chrysolaena*, *Echinocoryne*, *Stenocephalum* e *Vernonanthura* (Vernonieae, Asteraceae) de Minas Gerais, Brasil.**

Dissertation. Universidade Federal de Uberlândia, Uberlândia, MG, Brasil.

**SONBOLI, ALI; KAZEMPOUR-OSALOO, SHAHROKH; VALLÈS, JOAN; OBERPRIELER, CHRISTOPH (2011):  
Systematic Status and phylogenetic Relationships of the enigmatic *Tanacetum paradoxum* Bornm. (Asteraceae, Anthemideae): Evidences from nrDNA ITS, micromorphological, and cytological Data.**

In: Plant Systematics and Evolution 292 (1-2), p. 85–93. DOI: 10.1007/s00606-010-0415-x.

**SONBOLI, ALI; OBERPRIELER, CHRISTOPH (2012):  
Insights into the phylogenetic and taxonomic Position of *Tanacetum semenovii* Herder (Compositae, Anthemideae) based on nrDNA ITS Sequences Data.**

In: Biochemical Systematics and Ecology 45, p. 166–170. DOI: 10.1016/j.bse.2012.06.026.

**SONBOLI, ALI; STROKA, KATHRIN; KAZEMPOUR-OSALOO, SHAHROKH; OBERPRIELER, CHRISTOPH (2012):  
Molecular Phylogeny and Taxonomy of *Tanacetum* L. (Compositae, Anthemideae) inferred from nrDNA ITS and cpDNA trnH-psbA Sequence Variation.**

In: Plant Systematics and Evolution 298 (2), p. 431–444. DOI: 10.1007/s00606-011-0556-6.

**SOTO-TREJO, FABIOLA; SCHILLING, EDWARD E.; SOLÓRZANO, SOFÍA; OYAMA, KEN; LIRA, RAFAEL; DÁVILA, PATRICIA (2015):**

**Phylogenetic Relationships in the Genus *Florestina* (Asteraceae, Bahieae).**

In: Plant Systematics and Evolution 301 (9), p. 2147–2160. DOI: 10.1007/s00606-015-1220-3.

- STÅNGBERG, FRIDA; ELLIS, ALLAN G.; ANDERBERG, ARNE A. (2013):  
**Evolutionary Relationships in *Gorteria*: A Re-evaluation.**  
 In: Taxon 62 (3), p. 537–549. DOI: 10.12705/623.3.
- STEFFEN, SIMONE (2013):  
**Evolution von Miniaturisierung in arktisch-alpinen Lebensräumen in *Petasites* Mill., *Endocellion* Turcz. ex Herder, *Homogyne* Cass. und *Tussilago* L. (Asteraceae) sowie *Soldanella* L. (Primulaceae).**  
 Dissertation. Johannes Gutenberg-Universität Mainz, Mainz.
- SUÁREZ-SANTIAGO, VÍCTOR N.; CONSUELO DÍAZ E.; SOLTIS, DOUGLAS E.; SOLTIS, PAMELA S.; BLANCA, GABRIEL (2011):  
***Tragopogon lainzii* a new Species of *Tragopogon* (Asteraceae) Segregated from *T. dubius* : Evidence from morphological and molecular Data.**  
 In: Systematic Botany 36 (2), p. 470–480. DOI: 10.1600/036364411X569651.
- SUÁREZ-SANTIAGO, VÍCTOR N.; SALINAS, MARÍA J.; GARCIA-JACAS, NÚRIA; SOLTIS, PAMELA S.; SOLTIS, DOUGLAS E.; BLANCA, GABRIEL (2007):  
**Reticulate Evolution in the *Acrolophus* subgroup (*Centaurea* L., Compositae) from the western Mediterranean: Origin and Diversification of Section *Willkommia* Blanca.**  
 In: Molecular Phylogenetics and Evolution 43 (1), p. 156–172. DOI: 10.1016/j.ympev.2006.08.006.
- SUSANNA, ALFONSO; GALBANY-CASALS, MERCÈ; ROMASCHENKO, KONSTANTIN; BARRES, LAIA; MARTÍN, JOAN; GARCIA-JACAS, NÚRIA (2011):  
**Lessons from *Plectocephalus* (Compositae, Cardueae-Centaureinae): ITS Disorientation in annuals and Beringian Dispersal as revealed by molecular Analyses.**  
 In: Annals of Botany 108 (2), p. 263–277. DOI: 10.1093/aob/mcr138.
- SUSANNA, ALFONSO; GARCIA-JACAS, NÚRIA; HIDALGO, ORIANE; VILATERSANA, ROSER; GARNATJE, TERESA (2006):  
**The Cardueae (Compositae) Revisited: Insights from ITS, trn L- trn F, and matK Nuclear and Chloroplast DNA Analysis.**  
 In: Annals of the Missouri Botanical Garden 93 (1), p. 150–171. DOI: 10.3417/0026-6493(2006)93[150:TCCRIF]2.0.CO;2.
- SUSANNA, ALFONSO; GARNATJE, TERESA; GARCIA-JACAS, NÚRIA (1999):  
**Molecular Phylogeny of *Cheirolophus* (Asteraceae: Cardueae-Centaureinae) based on ITS Sequences of nuclear ribosomal DNA.**  
 In: Plant Systematics and Evolution 214, p. 147–160.
- SWENSON, ULF; MANNS, ULRICA (2003):  
**Phylogeny of *Pericallis* (Asteraceae): a total Evidence Approach Reappraising the double Origin of Woodiness.**  
 In: Taxon 52, p. 533–546.
- TADESSE, MESFIN; CRAWFORD, DANIEL J. (2014):  
**The phytomelanin layer in traditional Members of *Bidens* and *Coreopsis* and Phylogeny of the Coreopsideae (Compositae).**  
 In: Nordic Journal of Botany 32, p. 80–91.
- TAKAYAMA, KOJI; LÓPEZ-SEPÚLVEDA, PATRICIO; GREIMLER, JOSEF; CRAWFORD, DANIEL J.; PEÑAILILLO, PATRICIO; BAEZA, MARCELO ET AL. (2015):



**Relationships and genetic Consequences of contrasting Modes of Speciation among endemic Species of *Robinsonia* (Asteraceae, Senecioneae) of the Juan Fernández Archipelago, Chile, based on AFLPs and SSRs.**

In: the new Phytologist 205 (1), p. 415–428. DOI: 10.1111/nph.13000.

**TARIKAHYA-HACIOĞLU, BURCU; KARACAOĞLU, ÇAĞAŞAN; ÖZÜDOĞRU, BARIŞ (2014):**

**The Speciation History and Systematics of *Carthamus* (Asteraceae) with special Emphasis on Turkish Species by integrating phylogenetic and ecological Niche modelling Data.**

In: Plant Systematics and Evolution 300 (6), p. 1349–1359. DOI: 10.1007/s00606-013-0966-8.

**TERRAB, ANASS; ORTIZ, MARÍA ANGELES; TALAVERA, MARÍA; ARIZA, MARÍA JESÚS; MORIANA, MARÍA DEL CARMEN; GARCÍA-CASTAÑO, JUAN LUIS ET AL. (2009):**

**AFLP and breeding system Studies indicate Vicariance Origin for scattered Populations and enigmatic low Fecundity in the Moroccan endemic *Hypochaeris angustifolia* (Asteraceae), sister Taxon to all of the South American *Hypochaeris* Species.**

In: Molecular Phylogenetics and Evolution 53 (1), p. 13–22. DOI: 10.1016/j.ympev.2009.06.008.

**TIMME, RUTH E.; SIMPSON, BERYL B.; LINDER, C. RANDAL (2007):**

**High-resolution Phylogeny for *Helianthus* (Asteraceae) using the 18s-26s ribosomal DNA external transcribed spacer.**

In: American Journal of Botany 94 (11), p. 1837–1852. DOI: 10.3732/ajb.94.11.1837.

**TOMASELLO, SALVATORE; ÁLVAREZ, INÉS; VARGAS, PABLO; OBERPRIELER, CHRISTOPH (2015):**

**Is the extremely rare Iberian endemic Plant Species *Castrilanthemum debeauxii* (Compositae, Anthemideae) a 'living fossil'? Evidence from a multi-locus Species Tree Reconstruction.**

In: Molecular Phylogenetics and Evolution 82 Pt A, p. 118–130. DOI: 10.1016/j.ympev.2014.09.007.

**TORICES, RUBÉN; ANDERBERG, ARNE A. (2009):**

**Phylogenetic Analysis of sexual Systems in Inuleae (Asteraceae).**

In: American Journal of Botany 96 (5), p. 1011–1019. DOI: 10.3732/ajb.0800231.

**TORRELL, M.; CERBAH, M.; SILJAK-YAKOVLEV, SONJA; VALLS, J. (2003):**

**Molecular cytogenetics of the Genus *Artemisia* (Asteraceae, Anthemideae): Fluorochrome banding and fluorescence in situ Hybridization. I. Subgenus *Seriphidium* and related Taxa.**

In: Plant Systematics and Evolution 239 (1-2), p. 141–153. DOI: 10.1007/s00606-002-0259-0.

**TREMETSBERGER, KARIN; STUESSY, TOD F.; KADLEC, GERTRUD; URTUBEY, ESTRELLA; BAEZA, CARLOS M.; BECK, STEPHAN G. ET AL. (2006):**

**AFLP Phylogeny of South American Species of *Hypochaeris* (Asteraceae, Lactuceae).**

In: Systematic Botany 31 (3), p. 610–626. DOI: 10.1600/036364406778388520.

**TREMETSBERGER, KARIN; WEISS-SCHNEEWEISS, HANNA; STUESSY, TOD F.; SAMUEL, ROSABELLE; KADLEC, GERTRUD; ORTIZ, MARÍA ANGELES; TALAVERA, SALVADOR (2005):**

**Nuclear ribosomal DNA and Karyotypes indicate a NW-African Origin of South American *Hypochaeris* (Asteraceae, Cichorieae).**

In: Molecular Phylogenetics and Evolution 35 (1), p. 102–116. DOI: 10.1016/j.ympev.2004.12.022.

**URBATSCH, LOWELL E.; ROBERTS, ROLAND P.; KARAMAN, VESNA (2003):**

**Phylogenetic Evaluation of *Xylothamia*, *Gundlachia*, and related Genera (Asteraceae, Astereae) based on ETS and ITS nrDNA Sequence Data.**

In: American Journal of Botany 90 (4), p. 634–649. DOI: 10.3732/ajb.90.4.634.

**VAEZI, JAMIL; BROUILLET, LUC (2009):**

**Phylogenetic Relationships among diploid Species of *Symphyotrichum* (Asteraceae: Astereae) based on two nuclear Markers, ITS and Gapdh.**

In: Molecular Phylogenetics and Evolution 51 (3), p. 540–553. DOI: 10.1016/j.ympev.2009.03.003.

**VANIJAIVA, ONGKARN; KADEREIT, JOACHIM W. (2008):**

**A Revision of *Cissampelopsis* (Asteraceae: Senecioneae).**

In: Kew Bulletin 63, p. 213–226.

**VANIJAIVA, ONGKARN; KADEREIT, JOACHIM W. (2011):**

**A Revision of *Gynura* (Asteraceae: Senecioneae).**

In: Journal of Systematics and Evolution 49 (4), p. 285–314. DOI: 10.1111/j.1759-6831.2011.00139.x.

**VARGAS, OSCAR M.; MADRIÑÁN, SANTIAGO (2012):**

**Preliminary Phylogeny of *Diplostephium* (Asteraceae): Speciation Rate and Character Evolution.**

In: Lundellia 15, p. 1–15.

**VILATERSANA, ROSER; GARCIA-JACAS, NÚRIA; GARNATJE, TERESA; MOLERO, JULIÁN; SONNANTE, GABRIELLA; SUSANNA, ALFONSO (2010):**

**Molecular Phylogeny of the Genus *Ptilostemon* (Compositae: Cardueae) and its Relationships with *Cynara* and *Lamyropsis*.**

In: Systematic Botany 35 (4), p. 907–917. DOI: 10.1600/036364410X539952.

**VILATERSANA, ROSER; SUSANNA, ALFONSO; GARCIA-JACAS, NÚRIA; GARNATJE, TERESA (2000):**

**Generic Delimitation and Phylogeny of the *Carduncellus-Carthusus* complex (Asteraceae) based on ITS Sequences.**

In: Plant Systematics and Evolution 221, p. 89–105.

**VITALI, MAIRA SOLEDAD; SANCHO, GISELA; KATINAS, LILIANA (2015):**

**A Revision of *Smallanthus* (Asteraceae, Millerieae), the “yacón” Genus.**

In: Phytotaxa 214 (1), p. 1. DOI: 10.11646/phytotaxa.214.1.1.

**WAGSTAFF, STEVEN J.; BREITWIESER, I. (2002):**

**Phylogenetic Relationships of New Zealand Asteraceae inferred from ITS Sequences.**

In: Plant Systematics and Evolution 231, p. 203–224.

**WAGSTAFF, STEVEN J.; BREITWIESER, ILSE (2004):**

**Phylogeny and Classification of *Brachyglottis* (Senecioneae, Asteraceae): An Example of a Rapid Species Radiation in New Zealand.**

In: Systematic Botany 29 (4), p. 1003–1010. DOI: 10.1600/0363644042450991.

**WAGSTAFF, STEVEN J.; BREITWIESER, ILSE; ITO, MOTOMI (2011):**

**Evolution and Biogeography of *Pleurophyllum* (Astereae, Asteraceae), a small Genus of Megaherbs endemic to the Subantarctic Islands.**

In: American Journal of Botany 98 (1), p. 62–75. DOI: 10.3732/ajb.1000238.

**WAGSTAFF, STEVEN J.; BREITWIESER, ILSE; SWENSON, ULF (2006):**

**Origin and Relationships of the austral Genus *Abrotanella* (Asteraceae) inferred from DNA Sequences.**

In: Taxon 55 (1), p. 95–106.

**WAHRMUND, UTE; HEKLAU, HEIKE; RÖSER, MARTIN; KÄSTNER, ARNDT; VITEK, ERNST; EHRENDORFER, FRIEDRICH; HAGEN, K. BERNHARD VON (2010):**

**A molecular Phylogeny reveals frequent Changes of growth form in *Carlina* (Asteraceae).**

In: Taxon 59 (2), p. 367–378.

**WANG, GUANG-YAN; MENG, YING; DENG, T. A.O.; YANG, YONG-PING (2014):**

**Molecular Phylogeny of *Faberia* (Asteraceae: Cichorieae) based on nuclear and Chloroplast Sequences.**

In: Phytotaxa 167 (3), p. 223. DOI: 10.11646/phytotaxa.167.3.1.

**WANG, QIANG; MA, XIN-TANG; HONG, DE-YUAN (2014):**

**Phylogenetic Analyses reveal three new Genera of the Campanulaceae.**

In: Journal of Systematics and Evolution 52 (5), p. 541–550. DOI: 10.1111/jse.12096.

**WANG, YU-JIN; RAAB-STRAUBE, ECKHARD; SUSANNA, ALFONSO; LIU, JIAN-QUAN (2013):**

***Shangwua* (Compositae), a new Genus from the Qinghai-Tibetan Plateau and Himalayas.**

In: Taxon 62 (5), p. 984–996. DOI: 10.12705/625.19.

**WATANABE, K.; KOSUGE, KEIKO; SHIMAMURA, R.; KONISHI, N.; TANIGUCHI, K. (2006):**

**Molecular Systematics of Australian *Calotis* (Asteraceae: Astereae).**

In: Australian Systematic Botany 19 (2), p. 155. DOI: 10.1071/SB05001.

**WATSON, LINDA E.; BATES, PAUL L.; EVANS, TIMOTHY M.; UNWIN, MATTHEW M.; ESTES, JAMES R. (2002):**

**Molecular Phylogeny of Subtribe Artemisiinae (Asteraceae), including *Artemisia* and its allied and segregate Genera.**

In: BMC Evolutionary Biology 2, p. 17.

**WATSON, LINDA E.; EVANS, TIMOTHY M.; BOLUARTE, T. (2000):**

**Molecular Phylogeny and Biogeography of Tribe Anthemideae (Asteraceae), based on Chloroplast Gene *ndhF*.**

In: Molecular Phylogenetics and Evolution 15 (1), p. 59–69. DOI: 10.1006/mpev.1999.0714.

**WEISS-SCHNEEWEISS, HANNA; BLÖCH, CORDULA; TURNER, BARBARA; VILLASEÑOR, JOSÉ LUIS; STUESSY, TOD F.; SCHNEEWEISS, GERALD M. (2012):**

**The promiscuous and the chaste: frequent allopolyploid Speciation and its genomic Consequences in American daisies (*Melampodium* Sect. *Melampodium*; Asteraceae).**

In: Evolution 66 (1), p. 211–228. DOI: 10.1111/j.1558-5646.2011.01424.x.

**WEISS-SCHNEEWEISS, HANNA; TREMETSBERGER, KARIN; SCHNEEWEISS, GERALD M.; PARKER, JOHN S.; STUESSY, TOD F. (2008):**

**Karyotype Diversification and Evolution in diploid and polyploid South American *Hypochaeris* (Asteraceae) inferred from rDNA localization and genetic fingerprint Data.**

In: Annals of Botany 101 (7), p. 909–918. DOI: 10.1093/aob/mcn023.

**YUAN, QIAN; BI, YANCHAO; CHEN, YOU-SHENG (2015):**

***Diplazoptilon* (Asteraceae) is merged with *Saussurea* based on Evidence from Morphology and molecular Systematics.**

In: Phytotaxa 236 (1), p. 53. DOI: 10.11646/phytotaxa.236.1.4.

**YU-JIN, WANG; JIAN-QUAN, LIU (2004):**

**A preliminary Investigation on the Phylogeny of *Saussurea* (Asteraceae: Cardueae) based on Chloroplast DNA *trnL-F* Sequences.**

In: Acta Phytotaxonomica Sinica 42 (2), p. 136–153.

ZHANG, JIAN-WEN; BOUFFORD, DAVID E.; SUN, HANG (2011):

***Parasyncalathium* J.W.Zhang, Boufford & H. Sun (Asteraceae, Cichorieae): A new Genus endemic to the Himalaya-Hengduan Mountains.**

In: *Taxon* 60 (6), p. 1678–1684.

ZHANG, JIAN-WEN; NIE, ZE-LONG; WEN, JUN; SUN, HANG (2011):

**Molecular Phylogeny and Biogeography of three closely related Genera, *Sorozeris*, *Stebbinsia*, and *Syncalathium* (Asteraceae, Cichorieae), endemic to the Tibetan Plateau, SW-China.**

In: *Taxon* 60 (1), p. 15–26.

ZHAO, GUOHUA; CAO, ZHENGFEI; ZHANG, WEI; ZHAO, HONG (2015):

**The sesquiterpenoids and their chemotaxonomic Implications in *Senecio* L. (Asteraceae).**

In: *Biochemical Systematics and Ecology* 59, p. 340–347. DOI: 10.1016/j.bse.2015.02.001.

ZHAO, HONG-BO; CHEN, FA-DI; CHEN, SU-MEI; WU, GUO-SHENG; GUO, WEI-MING (2010):

**Molecular Phylogeny of *Chrysanthemum*, *Ajania* and its allies (Anthemideae, Asteraceae) as inferred from nuclear ribosomal ITS and Chloroplast trnL-F lgs Sequences.**

In: *Plant Systematics and Evolution* 284 (3-4), p. 153–169. DOI: 10.1007/s00606-009-0242-0.

## Asterales

KÄREHED, JESPER; LUNDBERG, JOHANNES; BREMER, BIRGITTA; BREMER, KARE (1999):

**Evolution of the Australasian families Alseusomiaceae, Argophyllaceae, and Phellinaceae.**

In: *Systematic Botany* 24 (4), p. 660–682.

LINDER, C. RANDAL; GOERTZEN, LESLIE R.; HEUVEL, B. VANDEN; FRANCISCO-ORTEGA, JAVIER; JANSEN, ROBERT K. (2000):

**The complete external transcribed spacer of 18s-26s rDNA: amplification and phylogenetic Utility at low taxonomic Levels in Asteraceae and closely allied Families.**

In: *Molecular Phylogenetics and Evolution* 14 (2), p. 285–303. DOI: 10.1006/mpev.1999.0706.

## Athyriaceae

ADJIEI, BAYU; TAKAMIYA, MASAYUKI; OHTA, MICHIHITO; OHSAWA, TAKESHI A.; WATANO, YASUYUKI (2008):

**Molecular Phylogeny of the Lady Fern Genus *Athyrium* in Japan based on Chloroplast rbcL and trnL-trnF- Sequences.**

In: *Acta Phytotaxonomica Geobotanica* 59 (2), p. 79–95.

KUO, LI-YAUNG; EBHARA, ATSUSHI; SHINOHARA, WATARU; ROUHAN, GERMINAL; WOOD, KENNETH R.; WANG, CHUN-NENG; CHIOU, WEN-LIANG (2016):

**Historical Biogeography of the Fern Genus *Deparia* (Athyriaceae) and its Relation with Polyploidy.**

In: *Molecular Phylogenetics and Evolution* 104, p. 123–134. DOI: 10.1016/j.ymp.2016.08.004.

LIU, YEA-CHEN; CHIOU, WEN-LIANG; KATO, MASAHIRO (2011):

**Molecular Phylogeny and Taxonomy of the Fern Genus *Anisocampium* (Athyriaceae).**

In: *Taxon* 60 (3), p. 824–830.

WEI, RAN; EBHARA, ATSUSHI; ZHU, YAN-MEI; ZHAO, CUN-FENG; HENNEQUIN, SABINE; ZHANG, XIAN-CHUN (2018):

**A total-Evidence Phylogeny of the Lady Fern Genus *Athyrium* Roth (Athyriaceae) with a new infrageneric Classification.**

In: *Molecular Phylogenetics and Evolution* 119, p. 25–36. DOI: 10.1016/j.ympev.2017.10.019.

**WEI, RAN; SCHNEIDER, HARALD; ZHANG, XIAN-CHUN (2013):**

**Toward a new Circumscription of the twinsorus-fern Genus *Diplazium* (Athryiaceae):  
A molecular Phylogeny with morphological Implications and infrageneric  
Taxonomy.**

In: *Taxon* 62 (3), p. 441–457.

## **Aucubaceae**

**OHI, TETSUO; KAJITA, TADASHI; MURATA, JIN (2003):**

**Distinct geographic Structure as Evidenced by Chloroplast DNA haplotypes and  
ploidy level in Japanese *Aucuba* (Aucubaceae).**

In: *American Journal of Botany* 90 (11), p. 1645–1652. DOI: 10.3732/ajb.90.11.1645.

## **Balanophoraceae**

**SU, HUEI-JIUN; HU, JER-MING; ANDERSON, FRANK E.; DER, JOSHUA P.; NICKRENT, DANIEL LEE (2015):**

**Phylogenetic Relationships of Santalales with Insights into the Origins of  
holoparasitic Balanophoraceae.**

In: *Taxon* 64 (3), p. 491–506. DOI: 10.12705/643.2.

**SU, HUEI-JIUN; MURATA, JIN; HU, JER-MING (2012):**

**Morphology and Phylogenetics of two holoparasitic plants, *Balanophora japonica*  
and *Balanophora yakushimensis* (Balanophoraceae), and their hosts in Taiwan and  
Japan.**

In: *Journal of Plant Research* 125 (3), p. 317–326. DOI: 10.1007/s10265-011-0447-5.

## **Balsaminaceae**

**FISCHER, EBERHARD; RAHELIVOLOLONA, MARIE ELISETTE (2016):**

**New Taxa of *Impatiens* (Balsaminaceae) from Madagascar VIII. *Impatiens max-  
huberi*, a new Species from Marojejy and Anjanaharibe-Sud.**

In: *Phytotaxa* 244 (2), p. 191. DOI: 10.11646/phytotaxa.244.2.7.

**JANSSENS, STEVEN B.; FISCHER, EBERHARD; STÉVART, TARIQ (2010):**

**New Insights into the Origin of two new epiphytic *Impatiens* Species (Balsaminaceae)  
from West Central Africa based on molecular phylogenetic Analyses.**

In: *Taxon* 59 (5), p. 1508–1518.

**JANSSENS, STEVEN B.; GEUTEN, KOEN; VIAENE, TOM; YUAN, YONG-MING; SONG, YI; SMETS, ERIK (2007):**

**Phylogenetic utility of the Ap3/def K-domain and its molecular Evolution in  
*Impatiens* (Balsaminaceae).**

In: *Molecular Phylogenetics and Evolution* 43 (1), p. 225–239. DOI: 10.1016/j.ympev.2006.11.016.

**JANSSENS, STEVEN B.; GEUTEN, KOEN; YUAN, YONG-MING; SONG, YI; KÜPFER, PHILIPPE; SMETS, ERIK (2006):**

**Phylogenetics of *Impatiens* and *Hydrocera* (Balsaminaceae) using Chloroplast atpB-  
rbcl Spacer Sequences.**

In: *Systematic Botany* 31 (1), p. 171–180.

**JANSSENS, STEVEN B.; KNOX, ERIC B.; HUYSMANS, SUZY; SMETS, ERIK F.; MERCKX, VINCENT S.F.T. (2009):**

**Rapid Radiation of *Impatiens* (Balsaminaceae) during Pliocene and Pleistocene:  
Result of a global Climate Change.**

In: *Molecular Phylogenetics and Evolution* 52 (3), p. 806–824. DOI: 10.1016/j.ympev.2009.04.013.

**JANSSENS, STEVEN B.; SONKÉ, BONAVENTURE; LACHENAUD, OLIVIER; LEMAIRE, BENNY; SIMO-DROISSART, MURIELLE;  
SMETS, ERIK (2015):**

**Morphology, Molecular Phylogenetics and Biogeography of *Impatiens akomensis* (Balsaminaceae), a new Species from Cameroon.**

In: *Plant Ecology and Evolution* 148 (3), p. 397–408. DOI: 10.5091/plecevo.2015.965.

**JANSSENS, STEVEN B.; WILSON, YI SONG; YUAN, YONG-MING; NAGELS, ANNE; SMETS, ERIK F.; HUYSMANS, SUZY (2012):  
A total Evidence approach using palynological Characters to infer the complex evolutionary History of the Asian *Impatiens* (Balsaminaceae).**

In: *Taxon* 61 (2), p. 355–367.

**UTAMI, NANDA; ARDIYANI, MARLINA (2015):**

**Phylogenetic Study of Sumatran *Impatiens* (Balsaminaceae) using Nuclear and Plastid DNA Sequences.**

In: *Acta Phytotaxonomica Geobotanica* 66 (2), p. 81–90.

**UTAMI, NANDA; SHIMIZU, TATEMI (2005):**

**Seed Morphology and Classification of *Impatiens* (Balsaminaceae).**

In: *Blumea* 50 (3), p. 447–456. DOI: 10.3767/000651905X622699.

**VOLKMAR, UTE; SMETS, ERIK F.; LENZ, HENNING; JANSSENS, STEVEN B. (2014):**

**Intron Evolution in a phylogenetic Perspective: Divergent Trends in the two Copies of the duplicated DEF Gene in *Impatiens* L. (Balsaminaceae).**

In: *Journal of Systematics and Evolution* 52 (2), p. 134–148. DOI: 10.1111/jse.12070.

**YU, SHENG-XIANG; JANSSENS, STEVEN B.; ZHU, XIANG-YUN; LIDÉN, MAGNUS; GAO, TIAN-GANG; WANG, WEI (2016):  
Phylogeny of *Impatiens* (Balsaminaceae): integrating molecular and morphological Evidence into a new Classification.**

In: *Cladistics* 32 (2), p. 179–197. DOI: 10.1111/cl.12119.

**YUAN, YONG-MING; SONG, YI; GEUTEN, KOEN; RAHELIVOLOLONA, MARIE ELISETTE; WOHLHAUSER, SÉBASTIEN; FISCHER, EBERHARD ET AL. (2004):**

**Phylogeny and Biogeography of Balsaminaceae inferred from ITS Sequences.**

In: *Taxon* 53 (2), p. 391–403.

**ZHANG, JASON GECHEN; ZHANG, LI-BING (2011):**

***Impatiens shimianensis* sp. nov. (Balsaminaceae): A new Species from Sichuan, China, based on morphological and molecular Evidence.**

In: *Systematic Botany* 36 (3), p. 721–729. DOI: 10.1600/036364411X583682.

## Basellaceae

**ERIKSSON, ROGER (2007):**

**A Synopsis of Basellaceae.**

In: *Kew Bulletin* 62 (2), p. 297–320.

## Begoniaceae

**BRENNAN, ADRIAN CHRISTOPHER; BRIDGETT, STEPHEN; SHAUKAT ALI, MOBINA; HARRISON, NICOLA; MATTHEWS, ANDREW; PELLICER, JAUME ET AL. (2012):**

**Genomic Resources for evolutionary Studies in the large, diverse tropical Genus *Begonia*.**

In: *Tropical Plant Biology* 5 (4), p. 261–276. DOI: 10.1007/s12042-012-9109-6.

**CLEMENT, WENDY L.; TEBBITT, MARK C.; FORREST, LAURA L.; BLAIR, JAIME E.; BROUILLET, LUC; ERIKSSON, TORSTEN; SWENSEN, SUSAN M. (2004):**

**Phylogenetic Position and Biogeography of *Hillebrandia sandwicensis* (Begoniaceae): a rare Hawaiian relict.**

In: American Journal of Botany 91 (6), p. 905–917. DOI: 10.3732/ajb.91.6.905.

**LOWE-FORREST, LAURA; HUGHES, MARK; HOLLINGSWORTH, PETER M. (2005):**

**A Phylogeny of *Begonia* using Nuclear Ribosomal Sequence Data and morphological Characters.**

In: Systematic Botany 30 (3), p. 671–682.

**PLANA, VANESSA; GASCOIGNE, ANGUS; FORREST, LAURA L.; HARRIS, DAVID J.; PENNINGTON, R. TOBY (2004):**

**Pleistocene and pre-Pleistocene *Begonia* Speciation in Africa.**

In: Molecular Phylogenetics and Evolution 31 (2), p. 449–461. DOI: 10.1016/j.ympev.2003.08.023.

**TEBBITT, MARK C.; DICKSON, JAMES H. (2000):**

**Amended Descriptions and Revised Sectional Assignment of Some Asian Begonias (Begoniaceae).**

In: Brittonia 52 (1), p. 112. DOI: 10.2307/2666496.

**TEBBITT, MARK C.; LOWE-FORREST, LAURA; SANTORIELLO, ANTHONY; CLEMENT, WENDY L.; SWENSEN, SUSAN M. (2006):**

**Phylogenetic Relationships of Asian *Begonia*, with an Emphasis on the Evolution of Rain-ballist and Animal Dispersal Mechanisms in Sections *Platycentrum*, *Sphenanthera* and *Leptosae*.**

In: Systematic Botany 31 (2), p. 327–336.

**THOMAS, DANIEL C.; HUGHES, MARK; PHUTTHAI, T.; RAJBHANDARY, S.; RUBITE, R.; ARDI, W. H.; RICHARDSON, JAMES E. (2011):**

**A non-coding Plastid DNA Phylogeny of Asian *Begonia* (Begoniaceae): Evidence for morphological Homoplasy and Sectional Polyphyly.**

In: Molecular Phylogenetics and Evolution 60 (3), p. 428–444. DOI: 10.1016/j.ympev.2011.05.006.

## **Berberidaceae**

**ADHIKARI, BHASKAR; MILNE, RICHARD IAN; PENNINGTON, R. TOBY; SÄRKINEN, TIINA E.; PENDRY, COLIN ALISTAIR (2015):**

**Systematics and Biogeography of *Berberis* s.l. inferred from nuclear ITS and Chloroplast ndhF Gene Sequences.**

In: Taxon 64 (1), p. 39–48. DOI: 10.12705/641.21.

**KIM, YOUNG-DONG; JANSEN, ROBERT K. (1998):**

**Chloroplast DNA Restriction Site Variation and Phylogeny of the Berberidaceae.**

In: American Journal of Botany 85 (12), p. 1766–1778.

**KIM, YOUNG-DONG; KIM, SUNG-HEE; KIM, CHUL HWAN; JANSEN, ROBERT K. (2004):**

**Phylogeny of Berberidaceae based on Sequences of the Chloroplast Gene ndhF.**

In: Biochemical Systematics and Ecology 32 (3), p. 291–301. DOI: 10.1016/j.bse.2003.08.002.

**KIM, YOUNG-DONG; KIM, SUNG-HEE; LANDRUM, LESLIE R. (2004):**

**Taxonomic and phylogeographic Implications from ITS Phylogeny in *Berberis* (Berberidaceae).**

In: Journal of Plant Research 117 (3), p. 175–182. DOI: 10.1007/s10265-004-0145-7.

**LI, YONG; ZHAI, SHENG-NAN; QIU, YING-XIONG; GUO, YAN-PING; GE, XUE-JUN; COMES, HANS PETER (2011):**

**Glacial survival east and west of the 'Mekong-Salween Divide' in the Himalaya-Hengduan Mountains Region as revealed by AFLPs and cpDNA Sequence Variation in *Sinopodophyllum hexandrum* (Berberidaceae).**

In: Molecular Phylogenetics and Evolution 59 (2), p. 412–424. DOI: 10.1016/j.ympev.2011.01.009.

**SHENG, MAO-YIN; WANG, LING-JIAO (2010):**

**Chromosomal localization of 45s and 5s rDNA in 14 Species and the Implications for Genome Evolution of Genus *Epimedium*.**

In: *Plant Systematics and Evolution* 290 (1-4), p. 65–73. DOI: 10.1007/s00606-010-0349-3.

**SUN, YE; FUNG, KWOK-PUI; LEUNG, PING-CHUNG; SHAW, PANG-CHUI (2005):**

**A phylogenetic Analysis of *Epimedium* (Berberidaceae) based on nuclear ribosomal DNA Sequences.**

In: *Molecular Phylogenetics and Evolution* 35 (1), p. 287–291. DOI: 10.1016/j.ympev.2004.12.014.

**WANG, WEI; CHEN, ZHI-DUAN; LIU, YANG; LI, RUI-QI; LI, JIAN-HUA (2007):**

**Phylogenetic and Biogeographic Diversification of Berberidaceae in the Northern Hemisphere.**

In: *Systematic Botany* 32 (4), p. 731–742.

**ZHANG, MING-LI; UHINK, CHRISTIAN H.; KADEREIT, JOACHIM W. (2007):**

**Phylogeny and Biogeography of *Epimedium/Vancouveria* (Berberidaceae): Western North American - East Asian Disjunctions, the Origin of European Mountain Plant Taxa, and East Asian Species Diversity.**

In: *Systematic Botany* 32 (1), p. 81–92.

## **Betulaceae**

**CHEN, ZHI-DUAN; LI, JIAN-HUA (2004):**

**Phylogenetics and Biogeography of *Alnus* (Betulaceae) inferred from Sequences of Nuclear Ribosomal DNA ITS Region.**

In: *International Journal of Plant Sciences* 165 (2), p. 325–335.

**CHEN, ZHI-DUAN; MANCHESTER, STEVEN R.; SUN, HAI-YING (1999):**

**Phylogeny and Evolution of the Betulaceae as inferred from DNA Sequences, Morphology, and Paleobotany.**

In: *American Journal of Botany* 86 (8), p. 1168–1181. DOI: 10.2307/2656981.

**FOREST, FÉLIX; BRUNEAU, ANNE (2000):**

**Phylogenetic Analysis, Organization, and molecular Evolution of the Nontranscribed Spacer of 5s Ribosomal RNA Genes in *Corylus* (Betulaceae).**

In: *International Journal of Plant Sciences* 161 (5), p. 793–806.

**JÄRVINEN, PIA; PALMÉ, ANNA; ORLANDO MORALES, LUIS; LÄNNENPÄÄ, MIKA; KEINÄNEN, MARKKU; SOPANEN, TUOMAS; LASCOUX, MARTIN (2004):**

**Phylogenetic Relationships of *Betula* Species (Betulaceae) based on nuclear Adh and Chloroplast matK Sequences.**

In: *American Journal of Botany* 91 (11), p. 1834–1845. DOI: 10.3732/ajb.91.11.1834.

**LI, JIAN-HUA; SHOUP, SUZANNE; CHEN, ZHI-DUAN (2005):**

**Phylogenetics of *Betula* (Betulaceae) inferred from Sequences of nuclear ribosomal DNA.**

In: *Rhodora* 107 (929), p. 69–86. DOI: 10.3119/04-14.1.

**LI, JIAN-HUA; SHOUP, SUZANNE; CHEN, ZHI-DUAN (2007):**

**Phylogenetic Relationships of Diploid Species of *Betula* (Betulaceae) inferred from DNA Sequences of Nuclear Nitrate Reductase.**

In: *Systematic Botany* 32 (2), p. 357–365.

**MA, HUI; LU, JING; LIU, BING-BING; DUAN, BING-BING; HE, XIAO-DONG; LIU, JIAN-QUAN (2015):**

**Phylotranscriptomic Analyses in plants using Betulaceae as an example.**



In: *Journal of Systematics and Evolution* 53 (5), p. 403–410. DOI: 10.1111/jse.12178.

**Yoo, Ki-OUG; WEN, JUN (2002):**

**Phylogeny and Biogeography of *Carpinus* and Subfamily Coryloideae (Betulaceae).**

In: *International Journal of Plant Sciences* 163 (4), p. 641–650.

**Yoo, Ki-OUG; WEN, JUN (2007):**

**Phylogeny of *Carpinus* and Subfamily Coryloideae (Betulaceae) based on Chloroplast and nuclear ribosomal Sequence Data.**

In: *Plant Systematics and Evolution* 267 (1-4), p. 25–35. DOI: 10.1007/s00606-007-0533-2.

## **Biebersteiniaceae**

**MÜLLNER, ALEXANDRA N.; VASSILIADES, D. D.; RENNER, SUSANNE P. (2007):**

**Placing Biebersteiniaceae, a herbaceous Clade of Sapindales, in a temporal and geographic Context.**

In: *Plant Systematics and Evolution* 266 (3-4), p. 233–252. DOI: 10.1007/s00606-007-0546-x.

## **Bignoniaceae**

**ALCANTARA, SUZANA; LOHMANN, LÚCIA GARCES (2010):**

**Evolution of Floral Morphology and Pollination System in Bignoniaceae (Bignoniaceae).**

In: *American Journal of Botany* 97 (5), p. 782–796. DOI: 10.3732/ajb.0900182.

**CALLMANDER, MARTIN W.; PHILLIPSON, PETER B.; PLUNKETT, GREGORY M.; EDWARDS, MOLLY B.; BUERKI, SVEN (2016):**

**Generic Delimitations, Biogeography and Evolution in the Tribe Coleeae (Bignoniaceae), endemic to Madagascar and the smaller Islands of the western Indian Ocean.**

In: *Molecular Phylogenetics and Evolution* 96, p. 178–186. DOI: 10.1016/j.ympev.2015.11.016.

**CHEN, SHAOTIAN; GUAN, KAIYUN; ZHOU, ZHEKUN; OLMSTEAD, RICHARD G.; CRONK, QUENTIN C.B. (2005):**

**Molecular Phylogeny of *Incarvillea* (Bignoniaceae) based on ITS and trnL-F Sequences.**

In: *American Journal of Botany* 92 (4), p. 625–633. DOI: 10.3732/ajb.92.4.625.

**COLLEVATTI, ROSANE G.; DORNELAS, MARCELO C. (2016):**

**Clues to the Evolution of Genome size and Chromosome Number in *Tabebuia* alliance (Bignoniaceae).**

In: *Plant Systematics and Evolution* 302 (5), p. 601–607. DOI: 10.1007/s00606-016-1280-z.

**FONSECA, LUIZ HENRIQUE MARTINS; LOHMANN, LÚCIA GARCES (2015):**

**Biogeography and Evolution of *Dolichandra* (Bignoniaceae, Bignoniaceae).**

In: *Botanical Journal of the Linnean Society* 179, p. 403–420.

**FONSECA, LUIZ HENRIQUE MARTINS; LOHMANN, LÚCIA GARCES (2018):**

**Combining high-throughput Sequencing and targeted Loci Data to infer the Phylogeny of the "*Adenocalymma-Neojobertia*" Clade (Bignoniaceae, Bignoniaceae).**

In: *Molecular Phylogenetics and Evolution* 123, p. 1–15. DOI: 10.1016/j.ympev.2018.01.023.

**GOMES, BEATRIZ M.; PROENÇA, CAROLYN E.B. (2010):**

**New Species of *Pleonotoma* (Bignoniaceae, Bignoniaceae) from Amazonia, Brazil.**

In: *Kew Bulletin* 65, p. 269–273.

**GROSE, SUSAN O.; OLMSTEAD, RICHARD G. (2007):**

**Evolution of a Charismatic Neotropical Clade: Molecular Phylogeny of *Tabebuia* s. l., Crescentieae, and Allied Genera (Bignoniaceae).**

In: *Systematic Botany* 32 (3), p. 650–659.

- GROSE, SUSAN O.; OLMSTEAD, RICHARD G. (2007):**  
**Taxonomic Revisions in the Polyphyletic Genus *Tabebuia* s. l. (Bignoniaceae).**  
In: Systematic Botany 32 (3), p. 660–670.
- KAHLER, MIRIAM; MICHELANGELI, FABIÁN ARMANDO; LOHMANN, LÚCIA GARCES (2012):**  
**Phylogeny of *Lundia* (Bignoniaceae) based on ndhF and PepC Sequences.**  
In: Taxon 61 (2), p. 368–380. DOI: 10.1002/tax.612008.
- LI, JIAN-HUA (2008):**  
**Phylogeny of *Catalpa* (Bignoniaceae) inferred from Sequences of Chloroplast ndhF and nuclear ribosomal DNA.**  
In: Journal of Systematics and Evolution 46 (3), p. 341–348.
- LOHMANN, LÚCIA GARCES (2006):**  
**Untangling the Phylogeny of Neotropical Lianas (Bignoniaceae, Bignoniaceae).**  
In: American Journal of Botany 93 (2), p. 304–318.
- MEDEIROS, MARIA CLÁUDIA MELO PACHECO DE; LOHMANN, LÚCIA GARCES (2015):**  
**Phylogeny and Biogeography of *Tynanthus* Miers (Bignoniaceae, Bignoniaceae).**  
In: Molecular Phylogenetics and Evolution 85, p. 32–40. DOI: 10.1016/j.ympev.2015.01.010.
- MEDEIROS, MARIA CLÁUDIA MELO PACHECO DE; LOHMANN, LÚCIA GARCES (2015):**  
**Taxonomic Revision of *Tynanthus* (Bignoniaceae, Bignoniaceae).**  
In: Phytotaxa 216 (1), p. 1. DOI: 10.11646/phytotaxa.216.1.1.
- OLMSTEAD, RICHARD G. (2013):**  
**Phylogeny and Biogeography in Solanaceae, Verbenaceae and Bignoniaceae: a Comparison of continental and intercontinental Diversification Patterns.**  
In: Botanical Journal of the Linnean Society 171, p. 80–102.
- OLMSTEAD, RICHARD G.; ZHRA, MICHELLE L.; LOHMANN, LÚCIA GARCES; GROSE, SUSAN O.; ECKERT, ANDREW J. (2009):**  
**A molecular Phylogeny and Classification of Bignoniaceae.**  
In: American Journal of Botany 96 (9), p. 1731–1743. DOI: 10.3732/ajb.0900004.
- PACE, MARCELO R.; LOHMANN, LÚCIA GARCES; OLMSTEAD, RICHARD G.; ANGYALOSSY, VERONICA (2015):**  
**Wood Anatomy of major Bignoniaceae Clades.**  
In: Plant Systematics and Evolution 301 (3), p. 967–995. DOI: 10.1007/s00606-014-1129-2.
- PACE, MARCELO R.; ZUNTINI, ALEXANDRE R.; LOHMANN, LÚCIA GARCES; ANGYALOSSY, VERONICA (2016):**  
**Phylogenetic Relationships of enigmatic *Sphingiphila* (Bignoniaceae) based on molecular and wood anatomical Data.**  
In: Taxon 65 (5), p. 1050–1063. DOI: 10.12705/655.7.
- POOL, AMY (2007):**  
**A Review of the Genus *Distictis* (Bignoniaceae).**  
In: Annals of the Missouri Botanical Garden 94 (4), p. 791–820. DOI: 10.3417/0026-6493(2007)94[791:AROTGD]2.0.CO;2.
- POOL, AMY (2007):**  
**A Revision of the Genus *Pithecoctenium* (Bignoniaceae).**  
In: Annals of the Missouri Botanical Garden 94 (3), p. 622–642. DOI: 10.3417/0026-6493(2007)94[622:AROTGP]2.0.CO;2.
- POOL, AMY (2008):**  
**A Review of the Genus *Pyrostegia* (Bignoniaceae).**  
In: Annals of the Missouri Botanical Garden 95 (3), p. 495–510. DOI: 10.3417/2003090.

POOL, AMY (2009):

**A Review of the Genus *Distictella* (Bignoniaceae).**

In: *Annals of the Missouri Botanical Garden* 96 (2), p. 286–323. DOI: 10.3417/2006156.

ZJHRA, MICHELLE L.; SYTSMA, KENNETH J.; OLMSTEAD, RICHARD G. (2004):

**Delimitation of Malagasy Tribe Coleeae and Implications for Fruit Evolution in Bignoniaceae inferred from a Chloroplast DNA Phylogeny.**

In: *Plant Systematics and Evolution* 245 (1-2). DOI: 10.1007/s00606-003-0025-y.

## Blechnaceae

GASPER, ANDRÉ LUÍS DE; ALMEIDA, THAÍS ELIAS; OLIVEIRA, DITTRICH VINÍCIUS ANTONIO DE; SMITH, ALAN R.; SALINO, ALEXANDRE (2017):

**Molecular Phylogeny of the Fern Family Blechnaceae (Polypodiales) with a revised Genus-level Treatment.**

In: *Cladistics* 33 (4), p. 429–446. DOI: 10.1111/cla.12173.

GASPER, ANDRÉ LUÍS DE; OLIVEIRA, DITTRICH VINÍCIUS ANTONIO DE; SALINO, ALEXANDRE (2016):

**A Classification for Blechnaceae (Polypodiales: Polypodiopsida): new Genera, resurrected names, and Combinations.**

In: *Phytotaxa* 275 (3), p. 191. DOI: 10.11646/phytotaxa.275.3.1.

PERRIE, LEON R.; WILSON, RUBY K.; SHEPHERD, LARA D.; OHLSEN, DANIEL J.; BATTY, ERIN L.; BROWNSEY, PATRICK J.; BAYLY, MICHAEL J. (2014):

**Molecular Phylogenetics and generic Taxonomy of Blechnaceae Ferns.**

In: *Taxon* 63 (4), p. 745–758. DOI: 10.12705/634.13.

## Bombacaceae

BAUM, DAVID A.; DEWITT SMITH, STACEY; YEN, ALAN C.; ALVERSON, WILLIAM S.; NYFFELER, RETO; WHITLOCK, BARBARA A.; OLDHAM, REBECCA L. (2004):

**Phylogenetic Relationships of *Malvatheca* (Bombacoideae and Malvoideae; Malvaceae sensu lato) as inferred from Plastid DNA Sequences.**

In: *American Journal of Botany* 91 (11), p. 1863–1871. DOI: 10.3732/ajb.91.11.1863.

CARVALHO-SOBRINHO, JEFFERSON GUEDES DE; ALVERSON, WILLIAM S.; ALCANTARA, SUZANA; QUEIROZ, LUCIANO PAGANUCCI; MOTA, ALINE C.; BAUM, DAVID A. (2016):

**Revisiting the Phylogeny of Bombacoideae (Malvaceae): Novel Relationships, morphologically cohesive Clades, and a new tribal Classification based on multilocus phylogenetic Analyses.**

In: *Molecular Phylogenetics and Evolution* 101, p. 56–74. DOI: 10.1016/j.ympev.2016.05.006.

CARVALHO-SOBRINHO, JEFFERSON GUEDES DE; QUEIROZ, LUCIANO PAGANUCCI (2011):

**Morphological cladistic Analysis of *Pseudobombax* Dugand (Malvaceae, Bombacoideae) and allied Genera.**

In: *Brazilian Journal of Botany* 34 (2), p. 197–209. DOI: 10.1590/S0100-84042011000200007.

DUARTE, MARÍLIA C.; ESTEVES, GERLENI LOPES; SALATINO, MARIA LUIZA FARIA; WALSH, KAREN C.; BAUM, DAVID A. (2011):

**Phylogenetic Analyses of *Eriotheca* and related Genera (Bombacoideae, Malvaceae).**

In: *Systematic Botany* 36 (3), p. 690–701. DOI: 10.1600/036364411X583655.

MARINHO, RAFAELA C.; MENDES-RODRIGUES, CLESNAN; BALAO, FRANCISCO; ORTIZ, PEDRO L.; YAMAGISHI-COSTA, JÚLIA; BONETTI, ANA M.; OLIVEIRA, PAULO E. (2014):

**Do Chromosome Numbers reflect Phylogeny? New counts for Bombacoideae and a Review of Malvaceae s.l.**

In: American Journal of Botany 101 (9), p. 1456–1465. DOI: 10.3732/ajb.1400248.

**PETTIGREW FRIS, JACK D.; BELL, KAREN L.; BHAGWANDIN, ADHIL; GRINAN, EUNICE; JILLANI, NGALLA; MEYER, JEAN ET AL. (2012):**

**Morphology, ploidy and molecular Phylogenetics reveal a new diploid Species from Africa in the baobab Genus *Adansonia* (Malvaceae: Bombacoideae).**

In: Taxon 61 (6), p. 1240–1250. DOI: 10.1002/tax.616006.

**RAZANAMARO, ONJA; RASOAMANANA, ELYSÉE; RAKOUTH, BAKOLIMALALA; RANDRIAMALALA, JOSOA RAMAROLANONANA; RABAKONADRIANINA, ELISABETH; CLÉMENT-VIDAL, ANNE ET AL. (2015):**

**Chemical characterization of Floral scents in the six endemic baobab Species (*Adansonia* sp.) of Madagascar.**

In: Biochemical Systematics and Ecology 60, p. 238–248. DOI: 10.1016/j.bse.2015.04.005.

## **Boraginaceae**

**CECCHI, LORENZO; COPPI, ANDREA; SELVI, FEDERICO (2009):**

***Nonea palmyrensis* (Boraginaceae): Morphology and phylogenetic affinities of a rare endemic of the Syro-Iraqi desert.**

In: Nordic Journal of Botany 27 (5), p. 381–387. DOI: 10.1111/j.1756-1051.2009.00418.x.

**CECCHI, LORENZO; COPPI, ANDREA; SELVI, FEDERICO (2011):**

**Evolutionary dynamics of serpentine Adaptation in *Onosma* (Boraginaceae) as revealed by ITS Sequence Data.**

In: Plant Systematics and Evolution 297 (3-4), p. 185–199. DOI: 10.1007/s00606-011-0506-3.

**CECCHI, LORENZO; SELVI, FEDERICO (2009):**

**Phylogenetic Relationships of the monotypic Genera *Halacsya* and *Paramoltkia* and the Origins of serpentine Adaptation in Circum-mediterranean Lithospermeae (Boraginaceae): Insights from ITS and matK DNA Sequences.**

In: Taxon 58 (3), p. 700–714.

**CHACÓN, JULIANA; LUEBERT, FEDERICO; HILGER, HARTMUT H.; OVCHINNIKOVA, SVETLANA; SELVI, FEDERICO; CECCHI, LORENZO ET AL. (2016):**

**The Borage Family (Boraginaceae s.str.): A revised infrafamilial Classification based on new phylogenetic Evidence, with Emphasis on the Placement of some enigmatic Genera.**

In: Taxon 65 (3), p. 523–546. DOI: 10.12705/653.6.

**COHEN, JAMES I. (2011):**

**A phylogenetic Analysis of morphological and molecular Characters of *Lithospermum* L. (Boraginaceae) and related taxa: evolutionary Relationships and Character Evolution.**

In: Cladistics 27 (6), p. 559–580. DOI: 10.1111/j.1096-0031.2011.00352.x.

**COHEN, JAMES I. (2014):**

**A phylogenetic Analysis of morphological and molecular Characters of Boraginaceae: evolutionary Relationships, Taxonomy, and Patterns of Character Evolution.**

In: Cladistics 30 (2), p. 139–169. DOI: 10.1111/cla.12036.

**DICKORÉ, W. BERNHARD; HILGER, HARTMUT H. (2015):**

***Decalepidanthus* (Boraginaceae) includes and antedates *Pseudomertensia*; a Synopsis of the Genus.**

In: Phytotaxa 226 (2), p. 131. DOI: 10.11646/phytotaxa.226.2.3.

- DIMON, RICHARD J.; RENNER, MATT A. M. (2017):**  
**A new *Cynoglossum* species, and transfers to *Hackelia* in eastern Australian Boraginaceae.**  
 In: Australian Systematic Botany 30 (2), p. 113. DOI: 10.1071/SB17004.
- GARCÍA-MAROTO, FEDERICO; MAÑAS-FERNÁNDEZ, AURORA; GARRIDO-CÁRDENAS, JOSÉ A.; ALONSO, DIEGO LÓPEZ; GUIL-GUERRERO, JOSÉ L.; GUZMÁN, BEATRIZ; VARGAS, PABLO (2009):**  
**Delta6-desaturase Sequence Evidence for explosive Pliocene Radiations within the adaptive Radiation of Macaronesian *Echium* (Boraginaceae).**  
 In: Molecular Phylogenetics and Evolution 52 (3), p. 563–574. DOI: 10.1016/j.ympev.2009.04.009.
- HASENSTAB-LEHMAN, KRISTEN E.; SIMPSON, MICHAEL G. (2012):**  
**Cat's Eyes and Popcorn Flowers: phylogenetic Systematics of the Genus *Cryptantha* s. l. (Boraginaceae).**  
 In: Systematic Botany 37 (3), p. 738–757. DOI: 10.1600/036364412X648706.
- HILGER, HARTMUT H.; GREUTER, WERNER; STIER, VICTORIA (2015):**  
**Taxa and Names in *Cynoglossum* sensu lato (Boraginaceae, Cynoglosseae): an annotated, synonymic Inventory, with links to the Protologues and Mention of original Material.**  
 In: Biodiversity Data Journal (3), e4831. DOI: 10.3897/BDJ.3.e4831.
- HILGER, HARTMUT H.; SELVI, FEDERICO; PAPINI, ALESSIO; BIGAZZI, MASSIMO (2004):**  
**Molecular Systematics of Boraginaceae Tribe Boragineae based on ITS1 and trnL Sequences, with special Reference to *Anchusa* s.l..**  
 In: Annals of Botany 94 (2), p. 201–212. DOI: 10.1093/aob/mch132.
- HUANG, JIAN-FENG; ZHANG, MING-LI; COHEN, JAMES I. (2013):**  
**Phylogenetic Analysis of *Lappula* Moench (Boraginaceae) based on molecular and morphological Data.**  
 In: Plant Systematics and Evolution 299 (5), p. 913–926. DOI: 10.1007/s00606-013-0772-3.
- KHOSHOKHAN MOZAFFAR, MARYAM; KAZEMPOUR-OSALOO, SHAHROKH; OSKOUYEYAN, ROGHAYEH; NADERI SAFFAR, KOSAR; AMIRAHMADI, ATEFE (2013):**  
**Tribe Eritrichieae (Boraginaceae s.str.) in West Asia: a molecular phylogenetic Perspective.**  
 In: Plant Systematics and Evolution 299 (1), p. 197–208. DOI: 10.1007/s00606-012-0715-4.
- KOLARČIK, V.; ZOZOMOVÁ-LIHOVÁ, JUDITA; MÁRTONFI, P. (2010):**  
**Systematics and evolutionary History of the *Asterotricha* Group of the Genus *Onosma* (Boraginaceae) in central and southern Europe inferred from AFLP and nrDNA ITS Data.**  
 In: Plant Systematics and Evolution 290 (1-4), p. 21–45. DOI: 10.1007/s00606-010-0346-6.
- KÖNIG, JULIA; SIWAKOTI, MOHAN; HILGER, HARTMUT H.; WEIGEND, MAXIMILIAN (2015):**  
**A Revision of the Genus *Cynoglossum* L. (Boraginaceae Juss.) in Nepal and Notes on the widespread Asian Species.**  
 In: Phytotaxa 224 (1), p. 1. DOI: 10.11646/phytotaxa.224.1.1.
- LÄNGSTRÖM, ELISABETH; CHASE, MARK W. (2002):**  
**Tribes of Boraginoideae (Boraginaceae) and Placement of *Antiphytum*, *Echiochilon*, *Ogastemma* and *Sericostoma*: A phylogenetic Analysis based on atpB Plastid DNA Sequence Data.**  
 In: Plant Systematics and Evolution 234 (1), p. 137–153. DOI: 10.1007/s00606-002-0195-z.

- LÄNGSTRÖM, ELISABETH; OXELMAN, BENGT (2003):  
**Phylogeny of *Echiochilon* (Echiochileae, Boraginaceae) based on ITS Sequences and Morphology.**  
In: *Taxon* 52 (4), p. 725. DOI: 10.2307/3647347.
- MEUDT, HEIDI M.; PREBBLE, JESSICA M.; LEHNEBACH, CARLOS A. (2015):  
**Native New Zealand Forget-me-nots (*Myosotis*, Boraginaceae) comprise a Pleistocene Species Radiation with very low genetic Divergence.**  
In: *Plant Systematics and Evolution* 301 (5), p. 1455–1471. DOI: 10.1007/s00606-014-1166-x.
- MOORE, MICHAEL J.; JANSEN, ROBERT K. (2006):  
**Molecular Evidence for the Age, Origin, and evolutionary History of the American Desert Plant Genus *Tiquilia* (Boraginaceae).**  
In: *Molecular Phylogenetics and Evolution* 39 (3), p. 668–687. DOI: 10.1016/j.ympev.2006.01.020.
- MOORE, MICHAEL J.; TYE, ALAN; JANSEN, ROBERT K. (2006):  
**Patterns of long-distance Dispersal in *Tiquilia* Subg. *Tiquilia* (Boraginaceae): Implications for the Origins of amphitropical disjuncts and Galapagos Islands endemics.**  
In: *American Journal of Botany* 93 (8), p. 1163–1177. DOI: 10.3732/ajb.93.8.1163.
- NAZAIRE, MARE; WANG, XIAO-QUAN; HUFFORD, LARRY (2014):  
**Geographic Origins and Patterns of Radiation of *Mertensia* (Boraginaceae).**  
In: *American Journal of Botany* 101 (1), p. 104–118. DOI: 10.3732/ajb.1300320.
- OTERO, ANA; JIMÉNEZ-MEJÍAS, PEDRO; VALCÁRCEL, VIRGINIA; VARGAS, PABLO (2014):  
**Molecular Phylogenetics and Morphology support two new Genera (*Memoremea* and *Nihon*) of Boraginaceae s.s.**  
In: *Phytotaxa* 173 (4), p. 241. DOI: 10.11646/phytotaxa.173.4.1.
- ROMEIRAS, MARIA M.; ASCENSÃO, LIA; DUARTE, MARIA CRISTINA; DINIZ, MARIA A.; PAIS, MARIA SALOMÉ (2008):  
**Taxonomy of *Echium* (Boraginaceae) Species from Cape Verde Islands.**  
In: *Australian Systematic Botany* 21 (1), p. 26. DOI: 10.1071/SB07016.
- ROMEIRAS, MARIA M.; PAULO, OCTÁVIO S.; DUARTE, MARIA CRISTINA; PINA-MARTINS, FRANCISCO; COTRIM, M. HELENA; CARINE, MARK A.; PAIS, MARIA SALOMÉ (2011):  
**Origin and Diversification of the Genus *Echium* (Boraginaceae) in the Cape Verde archipelago.**  
In: *Taxon* 60 (5), p. 1375–1385.
- SELVI, FEDERICO; BIGAZZI, MASSIMO; HILGER, HARTMUT H.; PAPINI, ALESSIO (2006):  
**Molecular Phylogeny, Morphology and taxonomic Re-Circumscription of the Generic Complex *Nonea/Elizaldia/Pulmonaria/Paraskevia* (Boraginaceae-Boragineae).**  
In: *Taxon* 55 (4), p. 907. DOI: 10.2307/25065685.
- SELVI, FEDERICO; CECCHI, LORENZO; COPPI, ANDREA (2009):  
**Phylogeny, Karyotype Evolution and Taxonomy of *Cerinth* L. (Boraginaceae).**  
In: *Taxon* 58 (4), p. 1307–1325.
- SELVI, FEDERICO; COPPI, ANDREA; CECCHI, LORENZO (2011):  
**High epizoochorous specialization and low DNA Sequence Divergence in Mediterranean *Cynoglossum* (Boraginaceae): Evidence from Fruit traits and ITS Region.**  
In: *Taxon* 60 (4), p. 969–985.

SELVI, FEDERICO; PAPINI, ALESSIO; HILGER, HARTMUT H.; BIGAZZI, MASSIMO; NARDI, E. (2004):

**The phylogenetic Relationships of *Cynoglottis* (Boraginaceae- Boragineae) inferred from ITS, 5.8s and trnL Sequences.**

In: Plant Systematics and Evolution 246 (3-4). DOI: 10.1007/s00606-004-0151-1.

SUTORÝ, KAREL (2010):

***Oncaglossum*, a new Genus of the Boraginaceae, Tribe Cynoglosseae, from Mexico.**

In: Novon: A Journal for Botanical Nomenclature 20 (4), p. 463–469. DOI: 10.3417/2008059.

SUTORÝ, KAREL (2016):

**New Names in the '*Cynoglossum montanum* Group' (Boraginaceae) in the Mediterranean Area.**

In: Edinburgh Journal of Botany 73 (03), p. 265–275. DOI: 10.1017/S0960428616000123.

THOMAS, DANIEL C.; WEIGEND, MAXIMILIAN; HILGER, HARTMUT H. (2008):

**Phylogeny and Systematics of *Lithodora* (Boraginaceae-Lithospermeae) and its affinities to the monotypic Genera *Mairetis*, *Halacsya* and *Paramoltkia* based on ITS1 and trnLUAA-sequence Data and Morphology.**

In: Taxon 57 (1), p. 79–97.

WEIGEND, MAXIMILIAN; GOTTSCHLING, MARC; HILGER, HARTMUT H.; NÜRK, NICOLAI M. (2010):

**Five new Species of *Lithospermum* L. (Boraginaceae Tribe Lithospermeae) in Andean South America: Another Radiation in the Amotape-Huancabamba Zone.**

In: Taxon 59 (4), p. 1161–1179.

WEIGEND, MAXIMILIAN; GOTTSCHLING, MARC; SELVI, FEDERICO; HILGER, HARTMUT H. (2009):

**Marbleseeds are gromwells - Systematics and Evolution of *Lithospermum* and allies (Boraginaceae Tribe Lithospermeae) based on molecular and morphological Data.**

In: Molecular Phylogenetics and Evolution 52 (3), p. 755–768. DOI: 10.1016/j.ympev.2009.05.013.

WEIGEND, MAXIMILIAN; LUEBERT, FEDERICO; GOTTSCHLING, MARC; COUVREUR, THOMAS L.P.; HILGER, HARTMUT H.; MILLER, JAMES P. (2014):

**From Capsules to Nutlets - phylogenetic Relationships in the Boraginales.**

In: Cladistics 30 (5), p. 508–518. DOI: 10.1111/cla.12061.

WEIGEND, MAXIMILIAN; LUEBERT, FEDERICO; SELVI, FEDERICO; BROKAMP, GRISCHA; HILGER, HARTMUT H. (2013):

**Multiple Origins for Hound's tongues (*Cynoglossum* L.) and Navel seeds (*Omphalodes* Mill.) - the Phylogeny of the borage Family (Boraginaceae s.str.).**

In: Molecular Phylogenetics and Evolution 68 (3), p. 604–618. DOI: 10.1016/j.ympev.2013.04.009.

WINKWORTH, RICHARD C.; GRAU, JÜRKE; ROBERTSON, ALASTAIR W.; LOCKHART, PETER J. (2002):

**The Origins and Evolution of the Genus *Myosotis* L. (Boraginaceae).**

In: Molecular Phylogenetics and Evolution 24 (2), p. 180–193. DOI: 10.1016/S1055-7903(02)00210-5.

## **Boraginaceae; Boraginales**

LUEBERT, FEDERICO; CECCHI, LORENZO; FROHLICH, MICHAEL W.; GOTTSCHLING, MARC; GUILLIAMS, C. MATT; HASENSTAB-LEHMAN, KRISTEN E. ET AL. (2016):

**Familial Classification of the Boraginales.**

In: Taxon 65 (3), p. 502–522. DOI: 10.12705/653.5.

MILLER, JAMES S.; GOTTSCHLING, MARC (2017):

**Generic Transfers in Malagasy Boraginales.**

In: Candollea 72 (2), p. 329–332. DOI: 10.15553/c2017v722a9.

## **Borthwickiaceae**

SU, JUN-XIA; WANG, WEI; ZHANG, LI-BING; CHEN, ZHI-DUAN (2012):

**Phylogenetic Placement of two enigmatic Genera, *Borthwickia* and *Stixis*, based on molecular and Pollen Data, and the Description of a new Family of Brassicales, Borthwickiaceae.**

In: *Taxon* 61 (3), p. 601–611.

## Brassicaceae

ALEXANDER, PATRICK J.; WINDHAM, MICHAEL D.; GOVINDARAJULU, RAJANIKANTH; AL-SHEHBAZ, IHSAN A.; BAILEY, C. DONOVAN (2010):

**Molecular Phylogenetics and Taxonomy of the Genus *Thysanocarpus* (Brassicaceae).**

In: *Systematic Botany* 35 (3), p. 559–577. DOI: 10.1600/036364410792495926.

ALI, TAHIR; SCHMUKER, ANGELIKA; RUNGE, FABIAN; SOLOVYEVA, IRINA; NIGRELLI, LISA; PAULE, JURAJ ET AL. (2016):

**Morphology, Phylogeny, and Taxonomy of *Microthlaspi* (Brassicaceae: Coluteocarpeae) and related Genera.**

In: *Taxon* 65 (1), p. 79–98. DOI: 10.12705/651.6.

AL-SHEHBAZ, IHSAN A. (2010):

***Arabis mexicana* belongs to *Planodes* (Brassicaceae).**

In: *Harvard Papers in Botany* 15 (1), p. 137–138. DOI: 10.3100/025.015.0106.

AL-SHEHBAZ, IHSAN A. (2012):

**A generic and tribal Synopsis of the Brassicaceae (Cruciferae).**

In: *Taxon* 61 (5), p. 931–954.

AL-SHEHBAZ, IHSAN A. (2013):

***Clypeola* is united with *Alyssum* (Brassicaceae).**

In: *Harvard Papers in Botany* 18 (2), p. 125–128. DOI: 10.3100/025.018.0204.

AL-SHEHBAZ, IHSAN A. (2014):

**A Synopsis of the Genus *Noccaea* (Coluteocarpeae, Brassicaceae).**

In: *Harvard Papers in Botany* 19 (1), p. 25–51. DOI: 10.3100/hpib.v19iss1.2014.n3.

AL-SHEHBAZ, IHSAN A.; BEILSTEIN, MARK A.; KELLOGG, ELIZABETH A. (2006):

**Systematics and Phylogeny of the Brassicaceae (Cruciferae): an Overview.**

In: *Plant Systematics and Evolution* 259 (2-4), p. 89–120. DOI: 10.1007/s00606-006-0415-z.

AMARASINGHE, SHANIKA; WATSON-HAIGH, NATHAN S.; GILLIHAM, MATTHEW; ROY, STUART; BAUMANN, UTE (2016):

**The evolutionary Origin of *Cipk16*: A Gene involved in enhanced Salt Tolerance.**

In: *Molecular Phylogenetics and Evolution* 100, p. 135–147. DOI: 10.1016/j.ympev.2016.03.031.

ARIAS, TATIANA; PIRES, J. CHRIS (2012):

**A fully resolved Chloroplast Phylogeny of the *Brassica* crops and wild relatives (Brassicaceae: Brassicaceae): Novel Clades and potential taxonomic Implications.**

In: *Taxon* 61 (5), p. 980–988.

BAILEY, C. DONOVAN; KOCH, MARCUS A.; MAYER, MICHAEL S.; MUMMENHOFF, KLAUS; O'KANE, STEVE L.; WARWICK, SUZANNE I. ET AL. (2006):

**Toward a global Phylogeny of the Brassicaceae.**

In: *Molecular Biology and Evolution* 23 (11), p. 2142–2160. DOI: 10.1093/molbev/msl087.

BECK, JAMES B.; AL-SHEHBAZ, IHSAN A.; O'KANE, STEVE L.; SCHAAL, BARBARA A. (2007):

**Further Insights into the Phylogeny of *Arabidopsis* (Brassicaceae) from nuclear *Atmyb2* flanking Sequence.**

In: *Molecular Phylogenetics and Evolution* 42 (1), p. 122–130. DOI: 10.1016/j.ympev.2006.06.011.



- BEILSTEIN, MARK A.; AL-SHEHBAB, IHSAN A.; KELLOGG, ELIZABETH A. (2006):  
Brassicaceae Phylogeny and Trichome Evolution.**  
In: American Journal of Botany 93 (4), p. 607–619.
- BEILSTEIN, MARK A.; AL-SHEHBAB, IHSAN A.; MATHEWS, SARAH; KELLOGG, ELIZABETH A. (2008):  
Brassicaceae Phylogeny inferred from Phytochrome A and ndhF Sequence Data:  
Tribes and Trichomes revisited.**  
In: American Journal of Botany 95 (10), p. 1307–1327. DOI: 10.3732/ajb.0800065.
- BLEEKER, WALTER; WEBER-SPARENBERG, C.; HURKA, HERBERT (2002):  
Chloroplast DNA Variation and Biogeography in the Genus *Rorippa* Scop.  
(Brassicaceae).**  
In: Plant Biology 4 (1), p. 104–111. DOI: 10.1055/s-2002-20442.
- CAI, LIMING; MA, HONG (2016):  
Using nuclear Genes to reconstruct Angiosperm Phylogeny at the Species Level: A  
case Study with Brassicaceae Species.**  
In: Journal of Systematics and Evolution 54 (4), p. 438–452. DOI: 10.1111/jse.12204.
- CAPPA, JENNIFER J.; YETTER, CRYSTAL; FAKRA, SIRINE; CAPPA, PATRICK J.; DETAR, RACHAEL; LANDES, CORBETT ET AL.  
(2015):  
Evolution of Selenium Hyperaccumulation in *Stanleya* (Brassicaceae) as inferred from  
Phylogeny, Physiology and X-ray microprobe Analysis.**  
In: the new Phytologist 205 (2), p. 583–595. DOI: 10.1111/nph.13071.
- CARLSEN, TOR; BLEEKER, WALTER; HURKA, HERBERT; ELVEN, REIDAR; BROCHMANN, CHRISTIAN (2009):  
Biogeography and Phylogeny of *Cardamine* (Brassicaceae) 1.**  
In: Annals of the Missouri Botanical Garden 96 (2), p. 215–236. DOI: 10.3417/2007047.
- CARLSEN, TOR; ELVEN, REIDAR; BROCHMANN, CHRISTIAN (2010):  
The evolutionary History of Beringian *Smelowskia* (Brassicaceae) inferred from  
combined Microsatellite and DNA Sequence Data.**  
In: Taxon 59 (2), p. 427–438.
- CHEN, SHENG-YUN; WU, GUILI; CHEN, SHI-LONG; REN, JIAWEN; QIN, DAHE (2010):  
Molecular Phylogeny and Biogeography of the narrow endemic *Coelonema* and  
affinitive *Draba* (Brassicaceae) based on two DNA Regions.**  
In: Biochemical Systematics and Ecology 38 (4), p. 796–805. DOI: 10.1016/j.bse.2010.08.002.
- COUVREUR, THOMAS L.P.; FRANZKE, ANDREAS; AL-SHEHBAB, IHSAN A.; BAKKER, FREEK T.; KOCH, MARCUS A.;  
MUMMENHOFF, KLAUS (2010):  
Molecular Phylogenetics, temporal Diversification, and Principles of Evolution in the  
mustard Family (Brassicaceae).**  
In: Molecular Biology and Evolution 27 (1), p. 55–71. DOI: 10.1093/molbev/msp202.
- DOĞAN, BEKİR; ÇELİK, MUSTAFA; ÜNAL, MURAT; SEFALİ, ABDURRAHMAN; MARTIN, ESRA; KAYA, AYLÄ (2016):  
Study of phylogenetic Relationship of Turkish Species of *Matthiola* (Brassicaceae)  
based on ISSR amplification.**  
In: Turkish Journal of Botany 40, p. 130–136. DOI: 10.3906/bot-1412-34.
- ESCHMANN-GRUPE, G.; HURKA, HERBERT; NEUFFER, BARBARA (2003):  
Species Relationships within *Diplotaxis* (Brassicaceae) and the phylogenetic Origin of  
*D. muralis*.**  
In: Plant Systematics and Evolution 243 (1-2), p. 13–29. DOI: 10.1007/s00606-003-0047-5.

- FIRAT, MEHMET; ÖZÜDOĞRU, BARIŞ; TARIKAHYA-HACIOĞLU, BURCU; BÜLBÜL, ALI SAVAŞ; AL-SHEHBAZ, IHSAN A.; MUMMENHOFF, KLAUS (2014):  
**Phylogenetic Position and taxonomic Assignment of *Thlaspi agricum* P.H.Davis & K.Tan (Brassicaceae).**  
 In: Phytotaxa 178 (4), p. 287. DOI: 10.11646/phytotaxa.178.4.2.
- FRANCISCO-ORTEGA, JAVIER; FUERTES-AGUILAR, JAVIER; GÓMEZ-CAMPO, C.; SANTOS-GUERRA, ARNOLDO; JANSEN, ROBERT K. (1999):  
**Internal transcribed spacer Sequence Phylogeny of *Crambe* L. (Brassicaceae): molecular Data reveal two Old World Disjunctions.**  
 In: Molecular Phylogenetics and Evolution 11 (3), p. 361–380. DOI: 10.1006/mpev.1998.0592.
- FRANCISCO-ORTEGA, JAVIER; FUERTES-AGUILAR, JAVIER; KIM, SEUNG-CHUL; SANTOS-GUERRA, ARNOLDO; CRAWFORD, DANIEL J.; JANSEN, ROBERT K. (2002):  
**Phylogeny of the Macaronesian endemic *Crambe* Section *Dendrocrambe* (Brassicaceae) based on internal transcribed Spacer Sequences of nuclear ribosomal DNA.**  
 In: American Journal of Botany 89 (12), p. 1984–1990. DOI: 10.3732/ajb.89.12.1984.
- FRANZKE, ANDREAS; GERMAN, DMITRY A.; AL-SHEHBAZ, IHSAN A.; MUMMENHOFF, KLAUS (2009):  
**Arabidopsis Family ties: molecular Phylogeny and age estimates in Brassicaceae.**  
 In: Taxon 58 (2), p. 425–437.
- FRANZKE, ANDREAS; LYSAK, MARTIN A.; AL-SHEHBAZ, IHSAN A.; KOCH, MARCUS A.; MUMMENHOFF, KLAUS (2011):  
**Cabbage Family affairs: the evolutionary History of Brassicaceae.**  
 In: Trends in Plant Science 16 (2), p. 108–116. DOI: 10.1016/j.tplants.2010.11.005.
- GERMAN, DMITRY A. (2016):  
**Taxonomic Notes on miscellaneous Cruciferae.**  
 In: Turczaninowia 19 (4), p. 129–135. DOI: 10.14258/turczaninowia.19.4.17.
- GERMAN, DMITRY A.; AL-SHEHBAZ, IHSAN A. (2008):  
**Five Additional Tribes (Aphragmeae, Biscutelleae, Calepineae, Conringieae, and Erysimeae) in the Brassicaceae (Cruciferae).**  
 In: Harvard Papers in Botany 13 (1), p. 165–170. DOI: 10.3100/1043-4534(2008)13[165:FATABC]2.0.CO;2.
- GERMAN, DMITRY A.; FRIESEN, NIKOLAI; NEUFFER, BARBARA; AL-SHEHBAZ, IHSAN A.; HURKA, HERBERT (2009):  
**Contribution to ITS Phylogeny of the Brassicaceae, with special Reference to some Asian taxa.**  
 In: Plant Systematics and Evolution 283 (1-2), p. 33–56. DOI: 10.1007/s00606-009-0213-5.
- GERMAN, DMITRY A.; GRANT, JASON R.; LYSAK, MARTIN A.; AL-SHEHBAZ, IHSAN A. (2011):  
**Molecular Phylogeny and Systematics of the Tribe Chorisoporeae (Brassicaceae).**  
 In: Plant Systematics and Evolution 294 (1-2), p. 65–86. DOI: 10.1007/s00606-011-0452-0.
- GOODSON, BARBARA E.; REHMAN, SUMAIYAH K.; JANSEN, ROBERT K. (2011):  
**Molecular Systematics and Biogeography of *Descurainia* (Brassicaceae) based on Nuclear ITS and Non-Coding Chloroplast DNA.**  
 In: Systematic Botany 36 (4), p. 957–980. DOI: 10.1600/036364411X604976.
- GOODSON, BARBARA E.; SANTOS-GUERRA, ARNOLDO; JANSEN, ROBERT K. (2006):  
**Molecular Systematics of *Descurainia* (Brassicaceae) in the Canary Islands: Biogeographic and taxonomic Implications.**  
 In: Taxon 55 (3), p. 671–682. DOI: 10.2307/25065643.
- GRUNDT, HANNE HEGRE; POPP, MAGNUS; BROCHMANN, CHRISTIAN; OXELMAN, BENGT (2004):

- Polyploid Origins in a circumpolar complex in *Draba* (Brassicaceae) inferred from cloned nuclear DNA Sequences and Fingerprints.**  
In: *Molecular Phylogenetics and Evolution* 32 (3), p. 695–710. DOI: 10.1016/j.ympev.2004.04.006.
- HALL, JOCELYN C.; TISDALE, TRACY E.; DONOHUE, KATHLEEN; WHEELER, ANDREW; AL-YAHYA, MOHAMMED A.; KRAMER, ELENA M. (2011):  
**Convergent Evolution of a complex Fruit Structure in the Tribe Brassiceae (Brassicaceae).**  
In: *American Journal of Botany* 98 (12), p. 1989–2003. DOI: 10.3732/ajb.1100203.
- HAO, GUOQIAN; AL-SHEHBAZ, IHSAN A.; AHANI, HAMID; LIANG, QIANLONG; MAO, KANG-SHAN; WANG, QIAN; LIU, JIAN-QUAN (2017):  
**An integrative Study of evolutionary Diversification of *Eutrema* (Eutremeae, Brassicaceae).**  
In: *Botanical Journal of the Linnean Society* 184 (2), p. 204–223. DOI: 10.1093/botlinnean/box024.
- HEENAN, PETER B.; GOEKE, DAGMAR F.; HOULISTON, GARY J.; LYSAK, MARTIN A. (2012):  
**Phylogenetic Analyses of ITS and rbcL DNA Sequences for sixteen Genera of Australian and New Zealand Brassicaceae result in the Expansion of the Tribe Microlepidieae.**  
In: *Taxon* 61 (5), p. 970–979.
- HEENAN, PETER B.; MITCHELL, ANTHONY D.; KOCH, MARCUS A. (2002):  
**Molecular Systematics of the New Zealand *Pachycladon* (Brassicaceae) complex: Generic Circumscription and Relationships to *Arabidopsis* sens. lat. and *Arabis* sens. lat.**  
In: *New Zealand Journal of Botany* 40 (4), p. 543–562. DOI: 10.1080/0028825X.2002.9512815.
- HU, HUAN; AL-SHEHBAZ, IHSAN A.; SUN, YONGSHUAI; HAO, GUOQIAN; WANG, QIAN; LIU, JIAN-QUAN (2015):  
**Species Delimitation in *Orychophragmus* (Brassicaceae) based on Chloroplast and nuclear DNA Barcodes.**  
In: *Taxon* 64 (4), p. 714–726. DOI: 10.12705/644.4.
- HUANG, CHIEN-HSUN; SUN, RENRAN; HU, YI; ZENG, LIPING; ZHANG, NING; CAI, LIMING ET AL. (2016):  
**Resolution of Brassicaceae Phylogeny using nuclear Genes uncovers nested Radiations and supports convergent morphological Evolution.**  
In: *Molecular Biology and Evolution* 33 (2), p. 394–412. DOI: 10.1093/molbev/msv226.
- IVALÚ CACHO, N.; MILLIE BURRELL, A.; PEPPER, ALAN E.; STRAUSS, SHARON Y. (2014):  
**Novel nuclear Markers inform the Systematics and the Evolution of Serpentine Use in *Streptanthus* and allies (Thelypodieae, Brassicaceae).**  
In: *Molecular Phylogenetics and Evolution* 72, p. 71–81. DOI: 10.1016/j.ympev.2013.11.018.
- JAÉN-MOLINA, RUTH; CAUJAPÉ-CASTELLS, JULI; REYES-BETANCORT, JORGE ALFREDO; AKHANI, HOSSEIN; FERNÁNDEZ-PALACIOS, OLGA; PAZ, JULIA PÉREZ ET AL. (2009):  
**The molecular Phylogeny of *Matthiola* R. Br. (Brassicaceae) inferred from ITS Sequences, with special Emphasis on the Macaronesian Endemics.**  
In: *Molecular Phylogenetics and Evolution* 53 (3), p. 972–981. DOI: 10.1016/j.ympev.2009.08.031.
- JOLY, SIMON; HEENAN, PETER B.; LOCKHART, PETER J. (2009):  
**A Pleistocene inter-tribal allopolyploidization event precedes the Species Radiation of *Pachycladon* (Brassicaceae) in New Zealand.**  
In: *Molecular Phylogenetics and Evolution* 51 (2), p. 365–372. DOI: 10.1016/j.ympev.2009.02.015.

- JORDON-THADEN, INGRID; HASE, IRINA; AL-SHEHBAZ, IHSAN A.; KOCH, MARCUS A. (2010):  
**Molecular Phylogeny and Systematics of the Genus *Draba* (Brassicaceae) and Identification of its most closely related Genera.**  
In: *Molecular Phylogenetics and Evolution* 55 (2), p. 524–540. DOI: 10.1016/j.ympev.2010.02.012.
- KARL, ROBERT; KOCH, MARCUS A. (2013):  
**A world-wide Perspective on crucifer Speciation and Evolution: Phylogenetics, Biogeography and trait Evolution in Tribe Arabideae.**  
In: *Annals of Botany* 112 (6), p. 983–1001. DOI: 10.1093/aob/mct165.
- KHOSRAVI, AHMAD REZA; JACQUEMOUD, FERNAND; MOHSENZADEH, SASAN; MENKE, MARCK; MUMMENHOFF, KLAUS (2009):  
**Phylogenetic Position and taxonomic Classification of *Aethionema trinervium* (Brassicaceae): A Morphologically variable Subshrub from Southwestern Asia.**  
In: *Annals of the Missouri Botanical Garden* 96 (4), p. 564–574. DOI: 10.3417/2007004.
- KIEFER, CHRISTIANE; DOBES, CHRISTOPH; KOCH, MARCUS A. (2009):  
***Boechea* or not? Phylogeny and Phylogeography of eastern North American *Boechea* Species (Brassicaceae).**  
In: *Taxon* 58 (4), p. 1109–1121.
- KIEFER, CHRISTIANE; DOBES, CHRISTOPH; SHARBEL, TIMOTHY F.; KOCH, MARCUS A. (2009):  
**Phylogeographic Structure of the Chloroplast DNA Gene Pool in North American *Boechea* - a Genus and continental-wide Perspective.**  
In: *Molecular Phylogenetics and Evolution* 52 (2), p. 303–311. DOI: 10.1016/j.ympev.2009.03.016.
- KOCH, MARCUS A. (2012):  
**Mid-Miocene Divergence of *Ionopsisidium* and *Cochlearia* and its Impact on the Systematics and Biogeography of the Tribe Cochlearieae (Brassicaceae).**  
In: *Taxon* 61 (1), p. 76–92.
- KOCH, MARCUS A.; KARL, ROBERT; GERMAN, DMITRY A.; AL-SHEHBAZ, IHSAN A. (2012):  
**Systematics, Taxonomy and Biogeography of three new Asian Genera of Brassicaceae Tribe Arabideae: An ancient Distribution circle around the Asian High Mountains.**  
In: *Taxon* 61 (5), p. 955–969.
- KOCH, MARCUS A.; MUMMENHOFF, KLAUS; HURKA, HERBERT (1999):  
**Molecular Phylogenetics of *Cochlearia* (Brassicaceae) and allied Genera based on nuclear ribosomal ITS DNA Sequence Analysis contradict traditional Concepts of their evolutionary Relationship.**  
In: *Plant Systematics and Evolution* 216 (3-4), p. 207–230. DOI: 10.1007/BF01084399.
- KUČERA, JAROMÍR; MARHOLD, KAROL; LIHOVÁ, JUDITA (2010):  
***Cardamine maritima* Group (Brassicaceae) in the amphi-Adriatic Area: A Hotspot of Species Diversity revealed by DNA Sequences and morphological Variation.**  
In: *Taxon* 59 (1), p. 148–164.
- LI, YAN; FENG, YING; LV, GUANGHUI; LIU, BING; QI, ALADAER (2015):  
**The Phylogeny of *Alyssum* (Brassicaceae) inferred from molecular Data.**  
In: *Nordic Journal of Botany* 33 (6), p. 715–721. DOI: 10.1111/njb.00588.
- LIHOVÁ, JUDITA; FUERTES-AGUILAR, JAVIER; MARHOLD, KAROL; NIETO FELINER, GONZALO (2004):  
**Origin of the disjunct tetraploid *Cardamine amporitana* (Brassicaceae) assessed with nuclear and Chloroplast DNA Sequence Data.**

In: American Journal of Botany 91 (8), p. 1231–1242. DOI: 10.3732/ajb.91.8.1231.

**LIHOVÁ, JUDITA; MARHOLD, KAROL; KUDOH, HIROSHI; KOCH, MARCUS A. (2006):**

**Worldwide Phylogeny and Biogeography of *Cardamine flexuosa* (Brassicaceae) and its relatives.**

In: American Journal of Botany 93 (8), p. 1206–1221. DOI: 10.3732/ajb.93.8.1206.

**LIU, LEI; ZHAO, BO; TAN, DUN-YAN; WANG, JIANBO (2011):**

**Phylogenetic Relationships of Brassicaceae in China: Insights from a non-coding Chloroplast, mitochondrial, and nuclear DNA Data set.**

In: Biochemical Systematics and Ecology 39 (4-6), p. 600–608. DOI: 10.1016/j.bse.2011.05.003.

**MANDÁKOVÁ, TEREZIE; MUMMENHOFF, KLAUS; AL-SHEHBAB, IHSAN A.; MUCINA, LADISLAV; LYSAK, ANDREAS A.; MÜHLHAUSEN, MARTIN (2012):**

**Whole-Genome triplication and Species Radiation in the southern African Tribe Heliophilleae (Brassicaceae).**

In: Taxon 61 (5), p. 989–1000.

**MAYER, MICHAEL S.; BESEDA, LINDSAY (2010):**

**Reconciling Taxonomy and Phylogeny in the *Streptanthus glandulosus* Complex (Brassicaceae).**

In: Annals of the Missouri Botanical Garden 97 (1), p. 106–116. DOI: 10.3417/2007010.

**MAZIE, ABIGAIL R.; BAUM, DAVID A. (2016):**

**Clade-specific positive selection on a developmental Gene: Branchless Trichome and the Evolution of stellate Trichomes in *Physaria* (Brassicaceae).**

In: Molecular Phylogenetics and Evolution 100, p. 31–40. DOI: 10.1016/j.ympev.2016.03.027.

**MITCHELL, ANTHONY D.; HEENAN, PETER B. (2000):**

**Systematic Relationships of New Zealand Endemic Brassicaceae inferred from nrDNA ITS Sequence Data.**

In: Systematic Botany 25 (1), p. 98–105. DOI: 10.2307/2666676.

**MOAZZENI, HAMID; ZARRE, SHAHIN; AL-SHEHBAB, IHSAN A.; MUMMENHOFF, KLAUS (2010):**

**Phylogeny of *Isatis* (Brassicaceae) and allied Genera based on ITS Sequences of nuclear ribosomal DNA and morphological Characters.**

In: Flora - Morphology, Distribution, Functional Ecology of Plants 205 (5), p. 337–343. DOI: 10.1016/j.flora.2009.12.028.

**MOAZZENI, HAMID; ZARRE, SHAHIN; PFEIL, BERNARD E.; BERTRAND, YANN J.K.; GERMAN, DMITRY A.; AL-SHEHBAB, IHSAN A. ET AL. (2014):**

**Phylogenetic Perspectives on Diversification and Character Evolution in the species-rich Genus *Erysimum* (Erysimeae; Brassicaceae) based on a densely sampled ITS approach.**

In: Botanical Journal of the Linnean Society 175 (4), p. 497–522. DOI: 10.1111/boj.12184.

**MUMMENHOFF, KLAUS; BRÜGGEMANN, HOLGER; BOWMAN, JOHN L. (2001):**

**Chloroplast DNA Phylogeny and Biogeography of *Lepidium* (Brassicaceae).**

In: American Journal of Botany 88 (11), p. 2051–2063. DOI: 10.2307/3558431.

**MUMMENHOFF, KLAUS; LINDER, HANS PETER; FRIESEN, NIKOLAI; BOWMAN, JOHN L.; LEE, JI-YOUNG; FRANZKE, ANDREAS (2004):**

**Molecular Evidence for bicontinental hybridogenous genomic Constitution in *Lepidium sensu stricto* (Brassicaceae) Species from Australia and New Zealand.**

In: American Journal of Botany 91 (2), p. 254–261. DOI: 10.3732/ajb.91.2.254.

- NAGPAL, RANJANA; DAR, TANVIR H.; RAINA, SOOM NATH (2008):**  
**Molecular Systematics of *Brassica* and allied Genera in Subtribes Brassicinae, Raphaninae, Moricandiinae, and Cakilinae (Brassicaceae, Tribe Brassiceae); the Organization and Evolution of ribosomal Gene Families.**  
 In: Botanical Journal of the Linnean Society 157 (3), p. 545–557. DOI: 10.1111/j.1095-8339.2008.00812.x.
- OMETTO, LINO; LI, MINGAI; BRESADOLA, LUISA; VAROTTO, CLAUDIO (2012):**  
**Rates of Evolution in stress-related Genes are associated with Habitat PReference in two Cardamine Lineages.**  
 In: BMC Evolutionary Biology 12, p. 7. DOI: 10.1186/1471-2148-12-7.
- ÖZÜDOĞRU, BARIŞ; AKAYDIN, GALIP; ERIK, SADIK; AL-SHEHBAZ, IHSAN A.; MUMMENHOFF, KLAUS (2015):**  
**Phylogeny, Diversification and biogeographic Implications of the eastern Mediterranean endemic Genus *Ricotia* (Brassicaceae).**  
 In: Taxon 64 (4), p. 727–740. DOI: 10.12705/644.5.
- PAROLLY, GERALD; NORDT, BIRGIT; BLEEKER, WALTER; MUMMENHOFF, KLAUS (2010):**  
***Heldreichia* Boiss. (Brassicaceae) revisited: A morphological and molecular Study.**  
 In: Taxon 59 (1), p. 187–202.
- REŠETNIK, IVANA; SATOVIĆ, ZLATKO; SCHNEEWEISS, GERALD M.; LIBER, ZLATKO (2013):**  
**Phylogenetic Relationships in Brassicaceae Tribe Alyseae inferred from nuclear ribosomal and Chloroplast DNA Sequence Data.**  
 In: Molecular Phylogenetics and Evolution 69 (3), p. 772–786. DOI: 10.1016/j.ympev.2013.06.026.
- REZA KHOSRAVI, AHMAD; MOHSENZADEH, SASAN; MUMMENHOFF, KLAUS (2008):**  
**Analysis of the phylogenetic Position of *Acanthocardamum erinaceum* (Brassicaceae) based on ITS-sequences shows that it should be transferred to *Aethionema* as *A. erinaceum*.**  
 In: Nordic Journal of Botany 26 (1-2), p. 25–30. DOI: 10.1111/j.0107-055X.2008.00205.x.
- REZA KHOSRAVI, AHMAD; MOHSENZADEH, SASAN; MUMMENHOFF, KLAUS (2008):**  
**Phylogenetic Position of *Brossardia papyracea* (Brassicaceae) based on Sequences of nuclear ribosomal DNA.**  
 In: Feddes Repertorium 119 (1-2), p. 13–23. DOI: 10.1002/fedr.200811146.
- SALARIATO, DIEGO LEONEL; ZULOAGA, FERNANDO OMAR (2017):**  
**Climatic niche Evolution in the Andean Genus *Menonvillea* (Cremolobaeae: Brassicaceae).**  
 In: Organisms Diversity and Evolution 17 (1), p. 11–28. DOI: 10.1007/s13127-016-0291-5.
- SALARIATO, DIEGO LEONEL; ZULOAGA, FERNANDO OMAR; AL-SHEHBAZ, IHSAN A. (2014):**  
**A Revision of the Genus *Menonvillea* (Cremolobaeae, Brassicaceae).**  
 In: Phytotaxa 162 (5), p. 241. DOI: 10.11646/phytotaxa.162.5.1.
- SALARIATO, DIEGO LEONEL; ZULOAGA, FERNANDO OMAR; AL-SHEHBAZ, IHSAN A. (2015):**  
**A taxonomic Revision of the Genus *Xerodraba* (Eudemeae, Brassicaceae).**  
 In: Phytotaxa 207 (1), p. 39. DOI: 10.11646/phytotaxa.207.1.2.
- SALARIATO, DIEGO LEONEL; ZULOAGA, FERNANDO OMAR; AL-SHEHBAZ, IHSAN A. (2013):**  
**Molecular Phylogeny of *Menonvillea* and Recognition of the new Genus *Aimara* (Brassicaceae: Cremolobaeae).**  
 In: Taxon 62 (6), p. 1220–1234. DOI: 10.12705/626.6.
- SALARIATO, DIEGO LEONEL; ZULOAGA, FERNANDO OMAR; AL-SHEHBAZ, IHSAN A. (2013):**

- Revision and tribal Placement of the Argentinean Genus *Parodiodoxa* (Brassicaceae).**  
In: *Plant Systematics and Evolution* 299 (2), p. 305–316. DOI: 10.1007/s00606-012-0722-5.
- SALARIATO, DIEGO LEONEL; ZULOAGA, FERNANDO OMAR; CANO, ASUNCIÓN; AL-SHEHBAZ, IHSAN A. (2015):  
Molecular Phylogenetics of Tribe Eudemeae (Brassicaceae) and Implications for its  
Morphology and Distribution.**  
In: *Molecular Phylogenetics and Evolution* 82 Pt A, p. 43–59. DOI: 10.1016/j.ympev.2014.09.030.
- SALARIATO, DIEGO LEONEL; ZULOAGA, FERNANDO OMAR; FRANZKE, ANDREAS; MUMMENHOFF, KLAUS; AL-SHEHBAZ,  
IHSAN A. (2016):  
Diversification Patterns in the Ces-Clade (Brassicaceae Tribes Cremolobeae,  
Eudemeae, Schizopetaleae) in Andean South America.**  
In: *Botanical Journal of the Linnean Society* 181, p. 543–566.
- SCHULTE, KATHARINA; HORRES, RALF; ZIZKA, GEORG (2005):  
Molecular Phylogeny of Bromelioideae and its Implications on Biogeography and the  
Evolution of CAM in the Family.**  
In: *Senckenbergiana Biologica* 85, p. 1–14.
- SIMÓN-PORCAR, VIOLETA I.; PÉREZ-COLLAZOS, ERNESTO; CATALÁN, PILAR (2015):  
Phylogeny and Systematics of the western Mediterranean *Vella pseudocytisus-V.*  
*aspera* complex (Brassicaceae).**  
In: *Turkish Journal of Botany* 39, p. 472–486. DOI: 10.3906/bot-1406-87.
- SLOTTE, T.; CEPLITIS, A.; NEUFFER, BARBARA; HURKA, HERBERT; LASCoux, MARTIN (2006):  
Intragenetic Phylogeny of *Capsella* (Brassicaceae) and the Origin of the tetraploid *C.*  
*bursa-pastoris* based on Chloroplast and nuclear DNA Sequences.**  
In: *American Journal of Botany* 93 (11), p. 1714–1724. DOI: 10.3732/ajb.93.11.1714.
- ŠPANIEL, STANISLAV; KEMPA, MATÚŠ; SALMERÓN-SÁNCHEZ, ESTEBAN; FUERTES-AGUILAR, JAVIER; MOTA, JUAN F.; AL-  
SHEHBAZ, IHSAN A. ET AL. (2015):  
AlyBase: Database of Names, Chromosome Numbers, and ploidy Levels of Alyseae  
(Brassicaceae), with a new generic Concept of the Tribe.**  
In: *Plant Systematics and Evolution* 301 (10), p. 2463–2491. DOI: 10.1007/s00606-015-1257-3.
- ŠPANIEL, STANISLAV; ZOZOMOVÁ-LIHOVÁ, JUDITA; MARHOLD, KAROL (2017):  
Revised taxonomic Treatment of the *Alyssum montanum-A. repens* complex in the  
Balkans: a multivariate morphometric Analysis.**  
In: *Plant Systematics and Evolution* 303 (10), p. 1413–1442. DOI: 10.1007/s00606-017-1468-x.
- TORO-NÚÑEZ, OSCAR; AL-SHEHBAZ, IHSAN A.; MORT, MARK E. (2015):  
Phylogenetic Study with nuclear and Chloroplast Data and ecological niche reveals  
*Atacama* (Brassicaceae), a new monotypic Genus endemic from the Andes of the  
Atacama Desert, Chile.**  
In: *Plant Systematics and Evolution* 301 (5), p. 1377–1396. DOI: 10.1007/s00606-014-1157-y.
- TORO-NÚÑEZ, OSCAR; MORT, MARK E.; RUIZ-PONCE, EDUARDO; AL-SHEHBAZ, IHSAN A. (2013):  
Phylogenetic Relationships of *Mathewsia* and *Schizopetalon* (Brassicaceae) inferred  
from nrDNA and cpDNA Regions: taxonomic and evolutionary Insights from an  
Atacama Desert endemic Lineage.**  
In: *Taxon* 62 (2), p. 343–356. DOI: 10.12705/622.4.
- WARWICK, SUZANNE I.; AL-SHEHBAZ, IHSAN A.; PRICE, ROBERT A.; SAUDER, CONNIE A. (2002):**

- Phylogeny of *Sisymbrium* (Brassicaceae) based on ITS Sequences of nuclear ribosomal DNA.**  
In: Canadian Journal of Botany 80 (9), p. 1002–1017. DOI: 10.1139/B02-089.
- WARWICK, SUZANNE I.; AL-SHEHBAZ, IHSAN A.; SAUDER, CONNIE A.; HARRIS, JAMES G.; KOCH, MARCUS A. (2004):  
Phylogeny of *Braya* and *Neotorularia* (Brassicaceae) based on nuclear ribosomal Internal Transcribed Spacer and Chloroplast trn L Intron Sequences.**  
In: Canadian Journal of Botany 82 (3), p. 376–392. DOI: 10.1139/B04-012.
- WARWICK, SUZANNE I.; MUMMENHOFF, KLAUS; SAUDER, CONNIE A.; KOCH, MARCUS A.; AL-SHEHBAZ, IHSAN A. (2010):  
Closing the gaps: phylogenetic Relationships in the Brassicaceae based on DNA Sequence Data of nuclear ribosomal ITS Region.**  
In: Plant Systematics and Evolution 285 (3-4), p. 209–232. DOI: 10.1007/s00606-010-0271-8.
- WARWICK, SUZANNE I.; SAUDER, CONNIE A. (2005):  
Phylogeny of Tribe Brassiceae (Brassicaceae) based on Chloroplast restriction site polymorphisms and nuclear ribosomal Internal Transcribed Spacer and Chloroplast trn L Intron Sequences.**  
In: Canadian Journal of Botany 83 (5), p. 467–483. DOI: 10.1139/B05-021.
- WARWICK, SUZANNE I.; SAUDER, CONNIE A.; AL-SHEHBAZ, IHSAN A. (2008):  
Phylogenetic Relationships in the Tribe Alysseae (Brassicaceae) based on nuclear ribosomal ITS DNA Sequences.**  
In: Botany 86 (4), p. 315–336. DOI: 10.1139/B08-013.
- WARWICK, SUZANNE I.; SAUDER, CONNIE A.; AL-SHEHBAZ, IHSAN A. (2011):  
Systematic Position of *Ivania*, *Scoliaxon*, and *Phravenia* (Brassicaceae).**  
In: Taxon 60 (4), p. 1156–1164.
- WARWICK, SUZANNE I.; SAUDER, CONNIE A.; AL-SHEHBAZ, IHSAN A.; JACQUEMOUD, FERNAND (2007):  
Phylogenetic Relationships in the Tribes Anthonieae, Chorisoporeae, Euclidieae, and Hesperideae (Brassicaceae) based on nuclear Ribosomal ITS DNA Sequences.**  
In: Annals of the Missouri Botanical Garden 94 (1), p. 56–78. DOI: 10.3417/0026-6493(2007)94[56:PRITTA]2.0.CO;2.
- WARWICK, SUZANNE I.; SAUDER, CONNIE A.; MAYER, MICHAEL S.; AL-SHEHBAZ, IHSAN A. (2009):  
Phylogenetic Relationships in the Tribes Schizopetaleae and Thelypodieae (Brassicaceae) based on nuclear ribosomal ITS Region and Plastid ndh F DNA Sequences.**  
In: Botany 87 (10), p. 961–985. DOI: 10.1139/B09-051.
- YU, QIU-SHI; WANG, QIAN; WANG, AI-LAN; WU, GUI-LI; LIU, JIAN-QUAN (2010):  
Interspecific Delimitation and phylogenetic Origin of *Pugionium* (Brassicaceae).**  
In: Journal of Systematics and Evolution 48 (3), p. 195–206. DOI: 10.1111/j.1759-6831.2010.00078.x.
- YUE, JI-PEI; SUN, HANG; BAUM, DAVID A.; LI, JIAN-HUA; AL-SHEHBAZ, IHSAN A.; REE, RICHARD H. (2009):  
Molecular Phylogeny of *Solms-laubachia* (Brassicaceae) s.l., based on multiple nuclear and Plastid DNA Sequences, and its biogeographic Implications.**  
In: Journal of Systematics and Evolution 47 (5), p. 402–415. DOI: 10.1111/j.1759-6831.2009.00041.x.
- YUE, JI-PEI; SUN, HANG; LI, JIAN-HUA; AL-SHEHBAZ, IHSAN A. (2008):  
A Synopsis of an expanded *Solms-laubachia* (Brassicaceae), and the Description of four new Species from Western China.**  
In: Annals of the Missouri Botanical Garden 95 (3), p. 520–538. DOI: 10.3417/2006214.



ZHOU, YING-YING; ZHANG, HONG-WEI; HU, JIANG-QIN; JIN, XIAO-FENG (2014):

***Sinallaria*, a new Genus of Brassicaceae from eastern China, based on morphological and molecular Data.**

In: Phytotaxa 186 (4), p. 188. DOI: 10.11646/phytotaxa.186.4.2.

ZIFFER-BERGER, J.; HANIN, N.; FOGEL, T.; MUMMENHOFF, KLAUS; BARAZANI, O. (2015):

**Molecular Phylogeny indicates Polyphyly in *Raphanus* L. (Brassicaceae).**

In: Edinburgh Journal of Botany 72 (1), p. 1–11. DOI: 10.1017/S0960428614000286.

ZOZOMOVÁ-LIHOVÁ, JUDITA; MARHOLD, KAROL; ŠPANIEL, STANISLAV (2014):

**Taxonomy and evolutionary History of *Alyssum montanum* (Brassicaceae) and related Taxa in southwestern Europe and Morocco: Diversification driven by polyploidy, geographic and ecological Isolation.**

In: Taxon 63 (3), p. 562–591. DOI: 10.12705/633.18.

## Bromeliaceae

AGUIRRE-SANTORO, JULIÁN; MICHELANGELI, FABIÁN ARMANDO; STEVENSON, DENNIS WM. (2016):

**Molecular Phylogenetics of the *Ronnbergia* Alliance (Bromeliaceae, Bromelioideae) and Insights into their morphological Evolution.**

In: Molecular Phylogenetics and Evolution 100, p. 1–20. DOI: 10.1016/j.ympev.2016.04.007.

ALMEIDA, VALQUÍRIA REZENDE; FERREIRA DA COSTA, ANDREA; MANTOVANI, ANDRÉ; GONÇALVES-ESTEVES, VÂNIA; OLIVEIRA, ROSANI DO CARMO; FORZZA, RAFAELA CAMPOSTRINI (2009):

**Morphological Phylogenetics of *Quesnelia* (Bromeliaceae, Bromelioideae).**

In: Systematic Botany 34 (4), p. 660–672. DOI: 10.1600/036364409790139619.

BARFUSS, MICHAEL H. J.; SAMUEL, ROSABELLE; TILL, WALTER; STUESSY, TOD F. (2005):

**Phylogenetic Relationships in Subfamily Tillandsioideae (Bromeliaceae) based on DNA Sequence Data from seven Plastid Regions.**

In: American Journal of Botany 92 (2), p. 337–351. DOI: 10.3732/ajb.92.2.337.

BARFUSS, MICHAEL H. J.; TILL, WALTER; LEME, ELTON M.C.; PINZÓN, JUAN P.; MANZANARES, JOSÉ M.; HALBRITTER, HEIDEMARIE ET AL. (2016):

**Taxonomic Revision of Bromeliaceae Subfam. Tillandsioideae based on a multi-locus DNA Sequence Phylogeny and Morphology.**

In: Phytotaxa 279 (1), p. 1. DOI: 10.11646/phytotaxa.279.1.1.

CASTELLO, LUCÍA V.; BARFUSS, MICHAEL H. J.; TILL, WALTER; GALETTO, LEONARDO; CHIAPPELLA, JORGE O. (2016):

**Disentangling the *Tillandsia capillaris* complex: phylogenetic Relationships and Taxon boundaries in Andean populations.**

In: Botanical Journal of the Linnean Society 181 (3), p. 391–414. DOI: 10.1111/boj.12400.

CHEW, TANIA; LUNA, EFRAÍN DE; GONZÁLEZ, DOLORES (2010):

**Phylogenetic Relationships of the Pseudobulbous *Tillandsia* Species (Bromeliaceae) inferred from Cladistic Analyses of ITS 2, 5.8s Ribosomal RNA Gene, and ETS Sequences.**

In: Systematic Botany 35 (1), p. 86–95. DOI: 10.1600/036364410790862632.

COSTA, ANDREA FERREIRA DA; GOMES-DA-SILVA, JANAÍNA; WANDERLEY, MARIA DAS GRAÇAS LAPA (2015):

***Vriesea* (Bromeliaceae, Tillandsioideae): a cladistic Analysis of eastern Brazilian Species based on morphological Characters.**

In: Rodriguésia 66 (2), p. 429–440. DOI: 10.1590/2175-7860201566211.

- CRUZ, GEYNER A. S.; ZIZKA, GEORG; SILVESTRO, DANIELE; LEME, ELTON M.C.; SCHULTE, KATHARINA; BENKO-ISEPPON, ANA MARIA (2017):  
**Molecular Phylogeny, Character Evolution and historical Biogeography of *Cryptanthus Otto & A. Dietr. (Bromeliaceae)*.**  
 In: *Molecular Phylogenetics and Evolution* 107, p. 152–165. DOI: 10.1016/j.ympev.2016.10.019.
- DONADÍO, SABINA; POZNER, RAÚL E.; GIUSSANI, LILIANA M. (2015):  
**Phylogenetic Relationships within *Tillandsia* Subgenus *Diaphoranthema (Bromeliaceae, Tillandsioideae)* based on a comprehensive morphological Dataset.**  
 In: *Plant Systematics and Evolution* 301 (1), p. 387–410. DOI: 10.1007/s00606-014-1081-1.
- GITAÍ, JAILSON; HORRES, RALF; BENKO-ISEPPON, ANA MARIA (2005):  
**Chromosomal features and Evolution of Bromeliaceae.**  
 In: *Plant Systematics and Evolution* 253 (1-4), p. 65–80. DOI: 10.1007/s00606-005-0306-8.
- GITAÍ, JAILSON; PAULE, JURAJ; ZIZKA, GEORG; SCHULTE, KATHARINA; BENKO-ISEPPON, ANA MARIA (2014):  
**Chromosome Numbers and DNA content in Bromeliaceae: additional Data and critical review.**  
 In: *Botanical Journal of the Linnean Society* 176 (3), p. 349–368. DOI: 10.1111/boj.12211.
- GIVNISH, THOMAS J.; BARFUSS, MICHAEL H. J.; VAN EE, BENJAMIN W.; RIINA, RICARDA; SCHULTE, KATHARINA; HORRES, RALF ET AL. (2014):  
**Adaptive Radiation, correlated and contingent Evolution, and net Species Diversification in Bromeliaceae.**  
 In: *Molecular Phylogenetics and Evolution* 71, p. 55–78. DOI: 10.1016/j.ympev.2013.10.010.
- GIVNISH, THOMAS J.; BARFUSS, MICHAEL H. J.; VAN EE, BENJAMIN W.; RIINA, RICARDA; SCHULTE, KATHARINA; HORRES, RALF ET AL. (2011):  
**Phylogeny, adaptive Radiation, and historical Biogeography in Bromeliaceae: Insights from an eight-locus Plastid Phylogeny.**  
 In: *American Journal of Botany* 98 (5), p. 872–895. DOI: 10.3732/ajb.1000059.
- GOETZE, MÁRCIA; SCHULTE, KATHARINA; PALMA-SILVA, CLARISSE; ZANELLA, CAMILA M.; BÜTTOW, MIRIAM V.; CAPRA, FERNANDA; BERED, FERNANDA (2016):  
**Diversification of Bromelioideae (Bromeliaceae) in the Brazilian Atlantic Rainforest: A case Study in *Aechmea* Subgenus *Ortgiesia*.**  
 In: *Molecular Phylogenetics and Evolution* 98, p. 346–357. DOI: 10.1016/j.ympev.2016.03.001.
- GOMES-DA-SILVA, JANAÍNA; SOUZA-CHIES, TATIANA TEIXEIRA DE (2018):  
**What actually is *Vriesea*? A total Evidence approach in a polyphyletic Genus of Tillandsioideae (Bromeliaceae, Poales).**  
 In: *Cladistics* 34 (2), p. 181–199. DOI: 10.1111/cla.12200.
- HORRES, RALF; SCHULTE, KATHARINA; WEISING, KURT; ZIZKA, GEORG (2007):  
**Systematics of Bromelioideae (Bromeliaceae) - Evidence from molecular and Anatomical Studies.**  
 In: *Aliso* 23 (1), p. 27–43. DOI: 10.5642/aliso.20072301.05.
- JABAILY, RACHEL SCHMIDT; SYTSMA, KENNETH J. (2010):  
**Phylogenetics of *Puya* (Bromeliaceae): Placement, major Lineages, and Evolution of Chilean Species.**  
 In: *American Journal of Botany* 97 (2), p. 337–356. DOI: 10.3732/ajb.0900107.
- KRAPP, FLORIAN; BARROS PINANGÉ, DIEGO SOTERO; BENKO-ISEPPON, ANA MARIA; LEME, ELTON M.C.; WEISING, KURT (2014):

**Phylogeny and Evolution of *Dyckia* (Bromeliaceae) inferred from Chloroplast and nuclear Sequences.**

In: Plant Systematics and Evolution 300, p. 1591–1614. DOI: 10.1007/s00606-014-0985-0.

LOUZADA, RAFAEL BATISTA; SCHULTE, KATHARINA; WANDERLEY, MARIA DAS GRAÇAS LAPA; SILVESTRO, DANIELE; ZIZKA, GEORG; BARFUSS, MICHAEL H. J.; PALMA-SILVA, CLARISSE (2014):

**Molecular Phylogeny of the Brazilian endemic Genus *Orthophytum* (Bromelioideae, Bromeliaceae) and its Implications on morphological Character Evolution.**

In: Molecular Phylogenetics and Evolution 77, p. 54–64. DOI: 10.1016/j.ympev.2014.03.007.

LOUZADA, RAFAEL BATISTA; VERSIEUX, LEONARDO M. (2010):

***Lapanthus* (Bromeliaceae, Bromelioideae): A new Genus from the Southern Espinhaço Range, Brazil.**

In: Systematic Botany 35 (3), p. 497–503. DOI: 10.1600/036364410792495908.

LOUZADA, RAFAEL BATISTA; WANDERLEY, MARIA DAS GRAÇAS LAPA (2010):

**Revision of *Orthophytum* (Bromeliaceae): the Species with sessile Inflorescences.**

In: Phytotaxa 13, p. 1–26.

MARTÍNEZ-CORREA, NANCY; ESPEJO-SERNA, ADOLFO; LÓPEZ-FERRARI, ANA ROSA; RAMÍREZ-MORILLO, IVÓN M. (2010):  
**Two Novelties in *Hechtia* (Bromeliaceae, Hechtioideae) from Mexico.**

In: Systematic Botany 35 (4), p. 745–754. DOI: 10.1600/036364410X539835.

MONTEIRO, RAQUEL FERNANDES; MANTOVANI, ANDRÉ; FORZZA, RAFAELA CAMPOSTRINI (2015):

**Morphological phylogenetic Analysis of Two Early-Diverging Genera of Bromelioideae (Bromeliaceae).**

In: Rodriguésia 66 (2), p. 505–521. DOI: 10.1590/2175-7860201566218.

PINZÓN, JUAN P.; RAMÍREZ-MORILLO, IVÓN M.; CARNEVALI, GERMÁN; BARFUSS, MICHAEL H. J.; TILL, WALTER; TUN, JUAN; ORTIZ-DÍAZ, JUAN J. (2016):

**Phylogenetics and Evolution of the *Tillandsia utriculata* complex (Bromeliaceae, Tillandsioideae) inferred from three Plastid DNA Markers and the ETS of the nuclear ribosomal DNA.**

In: Botanical Journal of the Linnean Society 181 (3), p. 362–390. DOI: 10.1111/boj.12425.

REX, MARTINA; SCHULTE, KATHARINA; ZIZKA, GEORG; PETERS, JULE; VÁSQUEZ, ROBERTO; IBISCH, PIERRE L.; WEISING, KURT (2009):

**Phylogenetic Analysis of *Fosterella* L.B.Sm. (Pitcairnioideae, Bromeliaceae) based on four Chloroplast DNA Regions.**

In: Molecular Phylogenetics and Evolution 51 (3), p. 472–485. DOI: 10.1016/j.ympev.2009.01.001.

SASS, CHODON; SPECHT, CHELSEA D. (2010):

**Phylogenetic estimation of the core Bromelioids with an Emphasis on the Genus *Aechmea* (Bromeliaceae).**

In: Molecular Phylogenetics and Evolution 55 (2), p. 559–571. DOI: 10.1016/j.ympev.2010.01.005.

SCHULTE, KATHARINA; BARFUSS, MICHAEL H. J.; ZIZKA, GEORG (2009):

**Phylogeny of Bromelioideae (Bromeliaceae) inferred from nuclear and Plastid DNA loci reveals the Evolution of the Tank Habit within the Subfamily.**

In: Molecular Phylogenetics and Evolution 51 (2), p. 327–339. DOI: 10.1016/j.ympev.2009.02.003.

SCHULTE, KATHARINA; SILVESTRO, DANIELE; KIEHLMANN, ELKE; VESELY, SANJA; NOVOA, PATRICIO; ZIZKA, GEORG (2010):  
**Detection of recent Hybridization between sympatric Chilean *Puya* Species (Bromeliaceae) using AFLP Markers and Reconstruction of complex Relationships.**

In: Molecular Phylogenetics and Evolution 57 (3), p. 1105–1119. DOI: 10.1016/j.ympev.2010.09.001.

SCHÜTZ, NICOLE; KRAPP, FLORIAN; WAGNER, NATASCHA; WEISING, KURT (2016):

**Phylogenetics of Pitcairnioideae s.s. (Bromeliaceae): Evidence from nuclear and Plastid DNA Sequence Data.**

In: Botanical Journal of the Linnean Society 181 (3), p. 323–342. DOI: 10.1111/boj.12403.

SILVESTRO, DANIELE; ZIZKA, GEORG; SCHULTE, KATHARINA (2014):

**Disentangling the effects of key Innovations on the Diversification of Bromelioideae (bromeliaceae).**

In: Evolution 68 (1), p. 163–175. DOI: 10.1111/evo.12236.

SOUSA, LEANDRO DE OLIVEIRA FURTADO DE; WENDT, TANIA; BROWN, GREGORY K.; TUTHILL, DOROTHY E.; EVANS, TIMOTHY M. (2007):

**Monophyly and phylogenetic Relationships in *Lymania* (Bromeliaceae: Bromelioideae) based on Morphology and Chloroplast DNA Sequences.**

In: Systematic Botany 32 (2), p. 264–270.

VERSIEUX, LEONARDO M.; BARBARÁ, THELMA; WANDERLEY, MARIA DAS GRAÇAS LAPA; CALVENTE, ALICE; FAY, MICHAEL F.; LEXER, CHRISTIAN (2012):

**Molecular Phylogenetics of the Brazilian giant bromeliads (*Alcantarea*, Bromeliaceae): Implications for morphological Evolution and Biogeography.**

In: Molecular Phylogenetics and Evolution 64 (1), p. 177–189. DOI: 10.1016/j.ympev.2012.03.015.

## Brownlowiaceae

TAN, H.S.; CHUNG, R. C.K.; SOEPADMO, E. (2011):

**A Synopsis of *Jarandersonia* (Malvaceae: Brownlowioideae).**

In: Gardens' Bulletin Singapore 63 (1-2), p. 137–144.

## Bruniaceae

CLABEN-BOCKHOFF, REGINE; OLIVER, EDWARD G.H.; HALL, ANTHONY V.; QUINT, MARCUS (2011):

**A new Classification of the South African endemic Family Bruniaceae based on molecular and morphological Data.**

In: Taxon 60 (4), p. 1138–1155.

QUINT, MARCUS; CLABEN-BOCKHOFF, REGINE (2006):

**Phylogeny of Bruniaceae based on matK and ITS Sequence Data.**

In: International Journal of Plant Sciences 167 (1), p. 135–146.

QUINT, MARCUS; CLABEN-BOCKHOFF, REGINE (2008):

**Ancient or recent? Insights into the temporal Evolution of the Bruniaceae.**

In: Organisms Diversity and Evolution 8 (4), p. 293–304. DOI: 10.1016/j.ode.2008.03.001.

## Burmanniaceae

MERCKX, VINCENT S.F.T.; CHATROU, LARS W.; LEMAIRE, BENNY; SAINGE, MOSES N.; HUYSMANS, SUZY; SMETS, ERIK F. (2008):

**Diversification of myco-heterotrophic Angiosperms: Evidence from Burmanniaceae.**

In: BMC Evolutionary Biology 8, p. 178. DOI: 10.1186/1471-2148-8-178.

MERCKX, VINCENT S.F.T.; SCHOLS, PETER; MAAS-VAN DE KAMER, HILTJE; MAAS, PAUL J.M.; HUYSMANS, SUZY; SMETS, ERIK (2006):

**Phylogeny and Evolution of Burmanniaceae (Dioscoreales) based on Nuclear and Mitochondrial Data.**

In: American Journal of Botany 93 (11), p. 1684–1698.

NEYLAND, RAY (2002):

**A Phylogeny inferred from large-subunit (26s) ribosomal DNA Sequences suggests that Burmanniales are polyphyletic.**

In: Australian Systematic Botany 15 (1), p. 19–28. DOI: 10.1071/SB01001.

**SUETSUGU, KENJI; KAWAKITA, ATSUSHI; KATO, MAKOTO (2014):**

**Evidence for specificity to *Glomus* Group Ab in two Asian mycoheterotrophic *Burmannia* Species.**

In: Plant Species Biology 29 (1), p. 57–64. DOI: 10.1111/j.1442-1984.2012.00387.x.

**YOKOYAMA, JUN U.N.; KOIZUMI, YAYOI; YOKOTA, MASATSUGU; TSUKAYA, HIROKAZU (2008):**

**Phylogenetic Position of *Oxygyne shinzatoi* (Burmanniaceae) inferred from 18s rDNA Sequences.**

In: Journal of Plant Research 121 (1), p. 27–32. DOI: 10.1007/s10265-007-0136-6.

## **Burseraceae**

**BECERRA, JUDITH X. (2003):**

**Evolution of Mexican *Bursera* (Burseraceae) inferred from ITS, ETS, and 5s nuclear ribosomal DNA Sequences.**

In: Molecular Phylogenetics and Evolution 26, p. 300–309.

**BECERRA, JUDITH X.; NOGE, KOGI; OLIVIER, SARAI; VENABLE, D. LAWRENCE (2012):**

**The Monophyly of *Bursera* and its impact for Divergence times of Burseraceae.**

In: Taxon 61 (2), p. 333–343.

**FEDERMAN, SARAH; DORNBURG, ALEX; DOWNIE, ALEXANDER; RICHARD, ALISON F.; DALY, DOUGLAS C.; DONOGHUE, MICHAEL J. (2015):**

**The biogeographic Origin of a Radiation of Trees in Madagascar: Implications for the assembly of a tropical forest biome.**

In: BMC Evolutionary Biology 15, p. 216. DOI: 10.1186/s12862-015-0483-1.

**FINE, PAUL V. A.; DALY, DOUGLAS C.; MUNOZ, GORKY VILLA; MESONES, ITALO; CAMERON, KENNETH M. (2005):**

**The Contribution of edaphic Heterogeneity to the Evolution and Diversity of Burseraceae Trees in the Western Amazon.**

In: Evolution 59 (7), p. 1464–1478.

**FINE, PAUL V. A.; ZAPATA, FELIPE; DALY, DOUGLAS C. (2014):**

**Investigating processes of Neotropical Rain Forest Tree Diversification by Examining the Evolution and historical Biogeography of the Protieae (Burseraceae).**

In: Evolution 68 (7), p. 1988–2004. DOI: 10.1111/evo.12414.

**GOSTEL, MORGAN R.; COY, KIERA A.; WEEKS, ANDREA (2015):**

**Microfluidic PCR-based target enrichment: A case Study in two rapid Radiations of *Commiphora* (Burseraceae) from Madagascar.**

In: Journal of Systematics and Evolution 53 (5), p. 411–431. DOI: 10.1111/jse.12173.

**GOSTEL, MORGAN R.; PHILLIPSON, PETER B.; WEEKS, ANDREA (2016):**

**Phylogenetic Reconstruction of the Myrrh Genus, *Commiphora* (Burseraceae), reveals multiple Radiations in Madagascar and clarifies infrageneric Relationships.**

In: Systematic Botany 41 (1), p. 67–81. DOI: 10.1600/036364416X690598.

**THULIN, MATS; BEIER, BJÖRN-AXEL; RAZAFIMANDIMBISON, SYLVAIN G.; BANKS, HANNAH I. (2008):**

***Ambilobea*, a new Genus from Madagascar, the Position of *Aucoumea*, and comments on the tribal Classification of the Frankincense and Myrrh Family (Burseraceae).**

In: *Nordic Journal of Botany* 26 (3-4), p. 218–229. DOI: 10.1111/j.1756-1051.2008.00245.x.

**WEEKS, ANDREA; DALY, DOUGLAS C.; SIMPSON, BERYL B. (2005):**

**The phylogenetic History and Biogeography of the Frankincense and Myrrh Family (Burseraceae) based on nuclear and Chloroplast Sequence Data.**

In: *Molecular Phylogenetics and Evolution* 35 (1), p. 85–101. DOI: 10.1016/j.ympev.2004.12.021.

**WEEKS, ANDREA; SIMPSON, BERYL B. (2004):**

**Molecular Genetic Evidence for Interspecific Hybridization among Endemic Hispaniolan *Bursera* (Burseraceae).**

In: *American Journal of Botany* 91 (6), p. 976–984.

**WEEKS, ANDREA; SIMPSON, BERYL B. (2007):**

**Molecular phylogenetic Analysis of *Commiphora* (Burseraceae) yields Insight on the Evolution and historical Biogeography of an "impossible" Genus.**

In: *Molecular Phylogenetics and Evolution* 42 (1), p. 62–79. DOI: 10.1016/j.ympev.2006.06.015.

## **Buxaceae**

**BALTHAZAR, MARIA VON; ENDRESS, PETER K.; QIU, YIN-LONG (2000):**

**Phylogenetic Relationships in Buxaceae based on nuclear internal transcribed Spacers and Plastid *ndhF* Sequences.**

In: *International Journal of Plant Sciences* 161 (5), p. 785–792.

**JIAO, ZHIHUA; LI, JIAN-HUA (2009):**

**Phylogenetics and Biogeography of eastern Asian-North American disjunct Genus *Pachysandra* (Buxaceae) inferred from nucleotide Sequences.**

In: *Journal of Systematics and Evolution* 47 (3), p. 191–201. DOI: 10.1111/j.1759-6831.2009.00021.x.

**VAN LAERE, KATRIJN; HERMANS, DIDIER; LEUS, LEEN; VAN HUYLENBROECK, JOHAN (2011):**

**Genetic Relationships in European and Asiatic *Buxus* Species based on AFLP Markers, Genome sizes and Chromosome Numbers.**

In: *Plant Systematics and Evolution* 293 (1-4), p. 1–11. DOI: 10.1007/s00606-011-0422-6.

## **Byblidaceae**

**FUKUSHIMA, KENJI; IMAMURA, KAORI; NAGANO, KATSUYA; HOSHI, YOSHIKAZU (2011):**

**Contrasting Patterns of the 5s and 45s rDNA Evolutions in the *Byblis liniflora* complex (Byblidaceae).**

In: *Journal of Plant Research* 124 (2), p. 231–244. DOI: 10.1007/s10265-010-0366-x.

## **Byttneriaceae**

**BORRONE, JAMES W.; MEEROW, ALAN W.; KUHN, DAVID N.; WHITLOCK, BARBARA A.; SCHNELL, RAYMOND J. (2007):**

**The potential of the *Wrky* Gene Family for phylogenetic reconstruction: an Example from the Malvaceae.**

In: *Molecular Phylogenetics and Evolution* 44 (3), p. 1141–1154. DOI: 10.1016/j.ympev.2007.06.012.

**GONÇALEZ, VICTOR MARTINS; ESTEVES, GERLENI LOPES (2015):**

**Synopsis of *Melochia* L. (Byttnerioideae, Malvaceae) in southeastern Brazil.**

In: *Phytotaxa* 226 (3), p. 217. DOI: 10.11646/phytotaxa.226.3.2.

**RONDÓN, JOSÉ BAUDILIO (2007):**

**Estudio Taxonómico del género *Melochia* L. (Sterculiaceae) en el estado Sucre, Venezuela.**

In: *Revista UDO Agrícola* 7 (1), p. 122–137.

SOUSA SILVA, C. R.; FIGUEIRA, A. (2005):

**Phylogenetic Analysis of *Theobroma* (Sterculiaceae) based on Kunitz-like Trypsin inhibitor Sequences.**

In: Plant Systematics and Evolution 250 (1-2), p. 93–104. DOI: 10.1007/s00606-004-0223-2.

WHITLOCK, BARBARA A.; BAYER, CLEMENS; BAUM, DAVID A. (2001):

**Phylogenetic Relationships and Floral Evolution of the Byttnerioideae (“Sterculiaceae” or Malvaceae s.l.) based on Sequences of the Chloroplast Gene, *ndhF*.**

In: Systematic Botany 26 (2), p. 420–437.

WHITLOCK, BARBARA A.; HALE, AMANDA M. (2011):

**The Phylogeny of *Ayenia*, *Byttneria*, and *Rayleya* (Malvaceae s. l.) and its Implications for the Evolution of Growth Forms.**

In: Systematic Botany 36 (1), p. 129–136. DOI: 10.1600/036364411X553216.

WHITLOCK, BARBARA A.; HALE, AMANDA M.; INDORF, JANE L.; WILKINS, CAROLYN F. (2011):

**Polyphyly of *Rulingia* and *Commersonia* (Lasiopetaleae, Malvaceae s.l.).**

In: Australian Systematic Botany 24 (5), p. 215–225. DOI: 10.1071/SB09030.

WILKINS, CAROLYN F.; WHITLOCK, BARBARA A. (2011):

**A new Australian Genus, *Androcalva*, separated from *Commersonia* (Malvaceae s.l. or Byttneriaceae).**

In: Australian Systematic Botany 24 (5), p. 284–349. DOI: 10.1071/SB10032.

## Cabombaceae

VIALETTE-GUIRAUD, AURELIE C. M.; ALAUX, MICHAEL; LEGEAI, FABRICE; FINET, CEDRIC; CHAMBRIER, PIERRE; BROWN, SPENCER C. ET AL. (2011):

***Cabomba* as a model for studies of early Angiosperm Evolution.**

In: Annals of Botany 108 (4), p. 589–598. DOI: 10.1093/aob/mcr088.

## Cactaceae

APPLEQUIST, WENDY L.; WALLACE, ROBERT P. (2002):

**Deletions in the Plastid trn T- trn L intergenic spacer define Clades within Cactaceae Subfamily Cactoideae.**

In: Plant Systematics and Evolution 231 (1-4), p. 153–162. DOI: 10.1007/s006060200017.

ARIAS, SALVADOR; TERRAZAS, TERESA (2009):

**Taxonomic Revision of *Pachycereus* (Cactaceae).**

In: Systematic Botany 34 (1), p. 68–83. DOI: 10.1600/036364409787602384.

ARIAS, SALVADOR; TERRAZAS, TERESA; ARREOLA-NAVA, HILDA J.; VÁZQUEZ-SÁNCHEZ, MONSERRAT; CAMERON, KENNETH M. (2005):

**Phylogenetic Relationships in *Peniocereus* (Cactaceae) inferred from Plastid DNA Sequence Data.**

In: Journal of Plant Research 118 (5), p. 317–328. DOI: 10.1007/s10265-005-0225-3.

BAKER, MARC A.; BUTTERWORTH, CHARLES A. (2013):

**Geographic Distribution and taxonomic Circumscription of populations within *Coryphantha* Section *Robustispina* (Cactaceae).**

In: American Journal of Botany 100 (5), p. 984–997. DOI: 10.3732/ajb.1200619.

BÁRCENAS, ROLANDO T. (2016):

**A molecular phylogenetic approach to the Systematics of *Cylindropuntieae* (*Opuntioideae*, *Cactaceae*).**

In: *Cladistics* 32 (4), p. 351–359. DOI: 10.1111/cla.12135.

**BÁRCENAS, ROLANDO T.; YESSON, CHRIS; HAWKINS, JULIE A. (2011):**

**Molecular Systematics of the *Cactaceae*.**

In: *Cladistics* 27 (5), p. 470–489. DOI: 10.1111/j.1096-0031.2011.00350.x.

**BUTTERWORTH, CHARLES A.; WALLACE, ROBERT P. (2004):**

**Phylogenetic studies of *Mammillaria* (*Cactaceae*) - Insights from Chloroplast Sequence Variation and Hypothesis Testing using the parametric Bootstrap.**

In: *American Journal of Botany* 91 (7), p. 1086–1098. DOI: 10.3732/ajb.91.7.1086.

**BUTTERWORTH, CHARLES A.; WALLACE, ROBERT P. (2005):**

**Molecular Phylogenetics of the leafy Cactus Genus *Pereskia* (*Cactaceae*).**

In: *Systematic Botany* 30 (4), p. 800–808.

**CALVENTE, ALICE; ZAPPI, DANIELA C.; FOREST, FÉLIX; LOHMANN, LÚCIA GARCES (2011):**

**Molecular Phylogeny of Tribe Rhipsalideae (*Cactaceae*) and taxonomic Implications for *Schlumbergera* and *Hatiora*.**

In: *Molecular Phylogenetics and Evolution* 58 (3), p. 456–468. DOI: 10.1016/j.ympev.2011.01.001.

**CALVENTE, ALICE; ZAPPI, DANIELA C.; FOREST, FÉLIX; LOHMANN, LÚCIA GARCES (2011):**

**Molecular Phylogeny, Evolution, and Biogeography of South American epiphytic Cacti.**

In: *International Journal of Plant Sciences* 172 (7), p. 902–914. DOI: 10.1086/660881.

**CRUZ, MIGUEL ÁNGEL; ARIAS, SALVADOR; TERRAZAS, TERESA (2016):**

**Molecular Phylogeny and Taxonomy of the Genus *Disocactus* (*Cactaceae*), based on the DNA Sequences of six Chloroplast Markers.**

In: *Willdenowia* 46 (1), p. 145–164. DOI: 10.3372/wi.46.46112.

**DEMAIO, PABLO H.; BARFUSS, MICHAEL H. J.; KIESLING, ROBERTO; TILL, WALTER; CHIAPPELLA, JORGE O. (2011):**

**Molecular Phylogeny of *Gymnocalycium* (*Cactaceae*): assessment of alternative infrageneric systems, a new Subgenus, and Trends in the Evolution of the Genus.**

In: *American Journal of Botany* 98 (11), p. 1841–1854. DOI: 10.3732/ajb.1100054.

**EDWARDS, ERIKA J.; NYFFELER, RETO; DONOGHUE, MICHAEL J. (2005):**

**Basal Cactus Phylogeny: Implications of *Pereskia* (*Cactaceae*) Paraphyly for the Transition to the Cactus Life Form.**

In: *American Journal of Botany* 92 (7), p. 1177–1188. DOI: 10.3732/ajb.92.7.1177.

**FRANCK, ALAN R.; COCHRANE, BRUCE J.; GAREY, JAMES R. (2013):**

**Relationships and Dispersal of the Caribbean Species of *Harrisia* (Sect. *Harrisia*; *Cactaceae*) using AFLPs and seven DNA Regions.**

In: *Taxon* 62 (3), p. 486–497. DOI: 10.12705/623.5.

**GRIFFITH, M. PATRICK; PORTER, J. MARK (2009):**

**Phylogeny of *Opuntioideae* (*Cactaceae*).**

In: *International Journal of Plant Sciences* 170 (1), p. 107–116. DOI: 10.1086/593048.

**GUERRERO, PABLO C.; ARROYO, MARY T.K.; BUSTAMANTE, RAMIRO O.; DUARTE, MILÉN; HAGEMANN, THOMAS K.; WALTER, HELMUT E. (2011):**

**Phylogenetics and predictive Distribution modeling provide Insights into the geographic Divergence of *Eriosyce* subgen. *Neoporteria* (*Cactaceae*).**



In: *Plant Systematics and Evolution* 297 (1-2), p. 113–128. DOI: 10.1007/s00606-011-0512-5.

**HARPKE, DÖRTE; PETERSON, ANGELA (2006):**

**Non-concerted ITS Evolution in *Mammillaria* (Cactaceae).**

In: *Molecular Phylogenetics and Evolution* 41 (3), p. 579–593. DOI: 10.1016/j.ympev.2006.05.036.

**HERNÁNDEZ-HERNÁNDEZ, TANIA; HERNÁNDEZ, HÉCTOR M.; DE-NOVA, JOSÉ ARTURO; PUENTE, RAUL; EGUIARTE, LUIS E.; MAGALLÓN, SUSANA (2011):**

**Phylogenetic Relationships and Evolution of growth form in Cactaceae (Caryophyllales, Eudicotyledoneae).**

In: *American Journal of Botany* 98 (1), p. 44–61. DOI: 10.3732/ajb.1000129.

**KOROTKOVA, NADJA; BORSCH, THOMAS; QUANDT, DIETMAR; TAYLOR, NIGEL P.; MÜLLER, KAI F.; BARTHLOTT, WILHELM (2011):**

**What does it take to resolve Relationships and to identify Species with molecular Markers? An example from the epiphytic Rhipsalideae (Cactaceae).**

In: *American Journal of Botany* 98 (9), p. 1549–1572. DOI: 10.3732/ajb.1000502.

**LARRIDON, ISABEL; WALTER, HELMUT E.; GUERRERO, PABLO C.; DUARTE, MILÉN; CISTERNAS, MAURICIO A.; HERNÁNDEZ, CAROL PEÑA ET AL. (2015):**

**An integrative approach to Understanding the Evolution and Diversity of *Copiapoa* (Cactaceae), a threatened endemic Chilean Genus from the Atacama Desert.**

In: *American Journal of Botany* 102 (9), p. 1506–1520. DOI: 10.3732/ajb.1500168.

**LAS PEÑAS, M. L.; URDAMPILLETA, J. D.; LÓPEZ-CARRO, B.; SANTIÑAQUE, F.; KIESLING, ROBERTO; BERNARDELLO, GABRIEL (2014):**

**Classical and molecular cytogenetics and DNA content in *Maihuenia* and *Pereskia* (Cactaceae).**

In: *Plant Systematics and Evolution* 300 (3), p. 549–558. DOI: 10.1007/s00606-013-0903-x.

**LEMONS, RENATA C. C.; MACHADO, MARLON C.; MELO-DE-PINNA, GLADYS F. (2013):**

**Morpho-anatomical Diversity of the underground Systems of *Arrojadoa* (Cactaceae), an endemic Brazilian Genus.**

In: *Botanical Journal of the Linnean Society* 173 (1), p. 108–128. DOI: 10.1111/boj.12077.

**MAJURE, LUCAS C.; PUENTE, RAUL; GRIFFITH, M. PATRICK; JUDD, WALTER S.; SOLTIS, PAMELA S.; SOLTIS, DOUGLAS E. (2012):**

**Phylogeny of *Opuntia* s.s. (Cactaceae): Clade delineation, geographic Origins, and reticulate Evolution.**

In: *American Journal of Botany* 99 (5), p. 847–864. DOI: 10.3732/ajb.1100375.

**MARTÍNEZ-GONZÁLEZ, CÉSAR; ALCÁNTARA, OTHÓN; LUNA-VEGA, ISOLDA; GARCIA-SANDOVAL, RICARDO (2015):**

**Phylogenetic Placement and new Data on macro- and micro-Morphology of *Nopalxochia phyllanthoides* (Cactaceae), an endangered Species from Mexico.**

In: *Phytotaxa* 222 (4), p. 241. DOI: 10.11646/phytotaxa.222.4.1.

**NYFFELER, RETO (2002):**

**Phylogenetic Relationships in the Cactus Family (Cactaceae) based on Evidence from trnK/ matK and trnL-trnF Sequences.**

In: *American Journal of Botany* 89 (2), p. 312–326. DOI: 10.3732/ajb.89.2.312.

**REALINI, MARÍA F.; GONZÁLEZ, GRACIELA E.; FONT, FABIÁN; PICCA, PABLO I.; POGGIO, LIDIA; GOTTLIEB, ALEXANDRA M. (2015):**

**Phylogenetic Relationships in *Opuntia* (Cactaceae, Opuntioideae) from southern South America.**

In: *Plant Systematics and Evolution* 301 (4), p. 1123–1134. DOI: 10.1007/s00606-014-1154-1.

**RITZ, CHRISTIANE M.; FICKENSCHER, KARL; FÖLLER, JENS; HERRMANN, KATJA; MECKLENBURG, RAINER; WAHL, RAINER (2016):**

**Molecular phylogenetic Relationships of the Andean Genus *Aylostera* Speg. (Cactaceae, Trichocereae), a new Classification and a morphological Identification Key.**

In: *Plant Systematics and Evolution* 302 (7), p. 763–780. DOI: 10.1007/s00606-016-1296-4.

**RITZ, CHRISTIANE M.; MARTINS, LUDWIG; MECKLENBURG, RAINER; GOREMYKIN, VADIM V.; HELLWIG, FRANK H. (2007):**  
**The molecular Phylogeny of *Rebutia* (Cactaceae) and its Allies demonstrates the Influence of Paleogeography on the Evolution of South American Mountain Cacti.**

In: *American Journal of Botany* 94 (8), p. 1321–1332. DOI: 10.3732/ajb.94.8.1321.

**RITZ, CHRISTINE M.; REIKER, J.; CHARLES, G.; HOXEY, P.; HUNT, D.; LOWRY, M. ET AL. (2012):**

**Molecular Phylogeny and Character Evolution in terete-stemmed Andean *Opuntias* (Cactaceae-Opuntioideae).**

In: *Molecular Phylogenetics and Evolution* 65 (2), p. 668–681. DOI: 10.1016/j.ympev.2012.07.027.

**SCHLUMPBERGER, BORIS O. (2012):**

**New Combinations in the *Echinopsis* alliance.**

In: *Cactaceae Systematics Initiatives* 28, p. 29–31.

**SCHLUMPBERGER, BORIS O.; RENNER, SUSANNE P. (2012):**

**Molecular Phylogenetics of *Echinopsis* (Cactaceae): Polyphyly at all levels and convergent Evolution of Pollination modes and growth forms.**

In: *American Journal of Botany* 99 (8), p. 1335–1349. DOI: 10.3732/ajb.1100288.

## Calceolariaceae

**ANDERSSON, STEPHAN (2006):**

**On the Phylogeny of the Genus *Calceolaria* (Calceolariaceae) as inferred from ITS and Plastid matK Sequences.**

In: *Taxon* 55 (1), p. 125–137. DOI: 10.2307/25065534.

**COSACOV, ANDREA; SÉRSIC, ALICIA N.; SOSA, VICTORIA; DE-NOVA, JOSÉ ARTURO; NYLINDER, STEPHAN; COCUCCI, ANDREA A. (2009):**

**New Insights into the phylogenetic Relationships, Character Evolution, and phytogeographic Patterns of *Calceolaria* (Calceolariaceae).**

In: *American Journal of Botany* 96 (12), p. 2240–2255. DOI: 10.3732/ajb.0900165.

**EHRHART, CHRISTINE (2005):**

**The Chilean *Calceolaria integrifolia* s.l. Species Complex (Scrophulariaceae).**

In: *Systematic Botany* 30 (2), p. 383–411.

**NYLINDER, STEPHAN; SWENSON, ULF; PERSSON, CLAES; JANSSENS, STEVEN B.; OXELMAN, BENGT (2012):**

**A dated species-tree approach to the trans-Pacific Disjunction of the Genus *Jovellana* (Calceolariaceae, Lamiales).**

In: *Taxon* 61 (2), p. 381–391. DOI: 10.1002/tax.612009.

**PUPPO, PAMELA (2010):**

**A new Species of *Calceolaria* (Calceolariaceae) from disturbed Paramos in South Ecuador.**

In: *Journal of the Botanical Research Institute of Texas* 4 (1), p. 33–36.

**PUPPO, PAMELA (2014):**

**Revision of the *Calceolaria tripartita* s. l. Species complex (Calceolariaceae) using multivariate Analyses of morphological characters.**

In: Phytotaxa 167 (1), p. 61. DOI: 10.11646/phytotaxa.167.1.3.

## **Calophyllaceae**

**ZAKARIA, RADHIAH; CHOONG, CHEE YEN; FARIDAH-HANUM, IBRAHIM (2007):**

**Systematic Study on Guttiferae Juss. of Peninsular Malaysia based on Plastid Sequences.**

In: Tropics 16 (2), p. 141–150. DOI: 10.3759/tropics.16.141.

## **Calycanthaceae**

**ZHOU, SHILIANG; RENNER, SUSANNE S.; WEN, JUN (2006):**

**Molecular Phylogeny and intra- and intercontinental Biogeography of Calycanthaceae.**

In: Molecular Phylogenetics and Evolution 39 (1), p. 1–15. DOI: 10.1016/j.ympev.2006.01.015.

## **Calyceraceae**

**DENHAM, SILVIA S.; ZAVALA-GALLO, LUCIO; JOHNSON, LEIGH A.; POZNER, RAÚL E. (2016):**

**Insights into the Phylogeny and evolutionary History of Calyceraceae.**

In: Taxon 65 (6), p. 1328–1344. DOI: 10.12705/656.7.

**POZNER, RAÚL E.; ZANOTTI, CHRISTIAN; JOHNSON, LEIGH A. (2012):**

**Evolutionary Origin of the Asteraceae Capitulum: Insights from Calyceraceae.**

In: American Journal of Botany 99 (1), p. 1–13. DOI: 10.3732/ajb.1100256.

**ZAVALA-GALLO, LUCIO; DENHAM, SILVIA S.; POZNER, RAÚL E. (2010):**

**Revision of the Genus *Nastanthus* (Calyceraceae).**

In: Gayana Botánica 67 (2), p. 158–175. DOI: 10.4067/S0717-66432010000200002.

## **Campanulaceae**

**ANTONELLI, ALEXANDRE (2008):**

**Higher level Phylogeny and evolutionary Trends in Campanulaceae Subfam. Lobelioideae: molecular Signal overshadows Morphology.**

In: Molecular Phylogenetics and Evolution 46 (1), p. 1–18. DOI: 10.1016/j.ympev.2007.06.015.

**BORSCH, THOMAS; KOROTKOVA, NADJA; RAUS, THOMAS; LOBIN, WOLFRAM; LÖHNE, CORNELIA (2009):**

**The petD Group II Intron as a Species level marker: utility for Tree Inference and Species Identification in the diverse Genus *Campanula* (Campanulaceae).**

In: Willdenowia 39 (1), p. 7–33. DOI: 10.3372/wi.39.39101.

**CHEON, KYEONG-SIK; YOO, KI-OUG (2013):**

**Phylogeny of *Hanabusaya* (Campanulaceae), a Korean endemic, based on ITS Sequences of nuclear ribosomal DNA.**

In: Journal of Systematics and Evolution 51 (6), p. 704–714. DOI: 10.1111/jse.12039.

**HABERLE, ROSEMARIE C.; DANG, ASHLEY; LEE, TAMMY; PEÑAFLO, CYNTHIA; CORTES-BURNS, HELEN; OESTREICH, ANDREA ET AL. (2009):**

**Taxonomic and biogeographic Implications of a phylogenetic Analysis of the Campanulaceae based on three Chloroplast Genes.**

In: Taxon 58 (3), p. 715–734.

**KNOX, ERIC B.; MUASYA, A. MUTHAMA; MUCHHALA, NATHAN (2008):**

**The Predominantly South American Clade of Lobeliaceae.**

In: Systematic Botany 33 (2), p. 462–468. DOI: 10.1600/036364408784571590.

- KOOPMAN, MARGARET M.; AYERS, TINA J. (2005):**  
**Nectar Spur Evolution in the Mexican Lobelias (Campanulaceae: Lobelioideae).**  
In: American Journal of Botany 92 (3), p. 558–562. DOI: 10.3732/ajb.92.3.558.
- LAGOMARSINO, LAURA P.; ANTONELLI, ALEXANDRE; MUCHHALA, NATHAN; TIMMERMANN, ALLAN; MATHEWS, SARAH; DAVIS, CHARLES C. (2014):**  
**Phylogeny, Classification, and Fruit Evolution of the species-rich Neotropical bellflowers (Campanulaceae: Lobelioideae).**  
In: American Journal of Botany 101 (12), p. 2097–2112. DOI: 10.3732/ajb.1400339.
- LAKUŠIĆ, DMITAR; LIBER, ZLATKO; NIKOLIĆ, TONI; SURINA, BOŠTJAN; KOVAČIĆ, SANJA; BOGDANOVIĆ, SANDRO; STEFANOVIĆ, SAŠA (2013):**  
**Molecular Phylogeny of the *Campanula pyramidalis* Species complex (Campanulaceae) inferred from Chloroplast and nuclear non-coding Sequences and its taxonomic Implications.**  
In: Taxon 62 (3), p. 505–524. DOI: 10.12705/623.1.
- OLESEN, JENS M.; ALARCÓN, MARISA; EHLERS, BODIL K.; ALDASORO, JUAN JOSÉ; ROQUET, CRISTINA (2012):**  
**Pollination, Biogeography and Phylogeny of oceanic Island Bellflowers (Campanulaceae).**  
In: Perspectives in Plant Ecology, Evolution and Systematics 14 (3), p. 169–182. DOI: 10.1016/j.ppees.2012.01.003.
- PARK, JEONG-MI; KOVAČIĆ, SANJA; LIBER, ZLATKO; EDDIE, WILLIAM M.M.; SCHNEEWEISS, GERALD M. (2006):**  
**Phylogeny and Biogeography of Isophyllous Species of *Campanula* (Campanulaceae) in the Mediterranean Area.**  
In: Systematic Botany 31 (4), p. 862–880.
- PREBBLE, JESSICA M.; CUPIDO, CHRISTOPHER N.; MEUDT, HEIDI M.; GARNOCK-JONES, PHILIP J. (2011):**  
**First phylogenetic and biogeographical Study of the southern Bluebells (*Wahlenbergia*, Campanulaceae).**  
In: Molecular Phylogenetics and Evolution 59 (3), p. 636–648. DOI: 10.1016/j.ympev.2011.03.013.
- PREBBLE, JESSICA M.; MEUDT, HEIDI M.; GARNOCK-JONES, PHILIP J. (2012):**  
**An expanded molecular Phylogeny of the southern bluebells (*Wahlenbergia*, Campanulaceae) from Australia and New Zealand.**  
In: Australian Systematic Botany 25 (1), p. 11. DOI: 10.1071/SB11023.
- ROQUET, CRISTINA; SÁEZ, LLORENÇ; JOSÉ ALDASORO, JUAN; SUSANNA, ALFONSO; LUISA ALARCÓN, MARÍA; GARCIA-JACAS, NÚRIA (2008):**  
**Natural Delineation, molecular Phylogeny and Floral Evolution in *Campanula*.**  
In: Systematic Botany 33 (1), p. 203–217. DOI: 10.1600/036364408783887465.
- ROQUET, CRISTINA; SANMARTÍN, ISABEL; GARCIA-JACAS, NÚRIA; SÁEZ, LLORENÇ; SUSANNA, ALFONSO; WIKSTRÖM, NIKLAS; ALDASORO, JUAN JOSÉ (2009):**  
**Reconstructing the History of Campanulaceae with a Bayesian approach to molecular dating and Dispersal-vicariance Analyses.**  
In: Molecular Phylogenetics and Evolution 52 (3), p. 575–587. DOI: 10.1016/j.ympev.2009.05.014.
- SCHNEEWEISS, GERALD M.; PACHSCHWÖLL, CLEMENS; TRIBSCH, ANDREAS; SCHÖNSWETTER, PETER; BARFUSS, MICHAEL H. J.; ESFELD, KORINNA ET AL. (2013):**  
**Molecular phylogenetic Analyses identify Alpine differentiation and dysploid Chromosome Number Changes as major forces for the Evolution of the European endemic *Phyteuma* (Campanulaceae).**

In: *Molecular Phylogenetics and Evolution* 69 (3), p. 634–652. DOI: 10.1016/j.ympev.2013.07.015.

**STEFANOVIĆ, SAŠA; LAKUŠIĆ, DMITAR; KUZMINA, MARIA; MEĐEDOVIĆ, SAFER; TAN, KIT; STEVANOVIĆ, VLADIMIR (2008):  
Molecular Phylogeny of *Edraianthus* (Grassy Bells; Campanulaceae) based on non-coding Plastid DNA Sequences.**

In: *Taxon* 57 (2), p. 452–475.

**WANG, QIANG; HONG, DE-YUAN (2015):**

**Taxonomic Revision of the Genus *Pseudocodon* (Campanulaceae) based on Character Analysis and molecular Phylogeny.**

In: *Phytotaxa* 204 (1), p. 49. DOI: 10.11646/phytotaxa.204.1.4.

**WANG, QIANG; ZHOU, SHI-LIANG; HONG, DE-YUAN (2013):**

**Molecular Phylogeny of the platycodonoid Group (Campanulaceae s.str.) with special Reference to the Circumscription of *Codonopsis*.**

In: *Taxon* 62 (3), p. 498–504.

**ZHOU, ZHUO; HONG, DE-YUAN; NIU, YANG; LI, GUO-DONG; NIE, ZE-LONG; WEN, JUN; SUN, HANG (2013):**

**Phylogenetic and biogeographic Analyses of the Sino-Himalayan endemic Genus *Cyananthus* (Campanulaceae) and Implications for the Evolution of its sexual system.**

In: *Molecular Phylogenetics and Evolution* 68 (3), p. 482–497. DOI: 10.1016/j.ympev.2013.04.027.

**ZHOU, ZHUO; WEN, JUN; LI, GUO-DONG; SUN, HANG (2012):**

**Phylogenetic assessment and biogeographic Analyses of Tribe Peracarpeae (Campanulaceae).**

In: *Plant Systematics and Evolution* 298 (2), p. 323–336. DOI: 10.1007/s00606-011-0547-7.

## Canellaceae

**MÜLLER, SEBASTIAN; SALOMO, KARSTEN; SALAZAR, JACKELINE; NAUMANN, JULIA; JARAMILLO, M. ALEJANDRA; NEINHUIS, CHRISTOPH ET AL. (2015):**

**Intercontinental long-distance Dispersal of Canellaceae from the new to the Old World revealed by a nuclear single Copy Gene and Chloroplast Loci.**

In: *Molecular Phylogenetics and Evolution* 84, p. 205–219. DOI: 10.1016/j.ympev.2014.12.010.

**ZIMMER, ELIZABETH A.; SUH, YOUNGBAE; KENNETH, KAROL G. (2012):**

**Phylogenetic Placement of a recently described Taxon of the Genus *Pleodendron* (Canellaceae).**

In: *Phytologia* 94 (3), p. 404–412.

## Cannabaceae

**YANG, MEI-QING; VAN VELZEN, ROBIN; BAKKER, FREEK T.; SATTARIAN, ALI; LI, DE-ZHU; YI, TING-SHUANG (2013):**

**Molecular Phylogenetics and Character Evolution of Cannabaceae.**

In: *Taxon* 62 (3), p. 473–485.

**YESSON, CHRIS; RUSSELL, STEPHEN J.; PARRISH, T.; DALLING, J. W.; GARWOOD, NANCY C. (2004):**

**Phylogenetic Framework for *Trema* (Celtidaceae).**

In: *Plant Systematics and Evolution* 248 (1-4), p. 85–109. DOI: 10.1007/s00606-004-0186-3.

## Cannales

**BARRETT, CRAIG F.; SPECHT, CHELSEA D.; LEEBENS-MACK, JIM H.; STEVENSON, DENNIS WM.; ZOMLEFER, WENDY B.; DAVIS, JERROLD I. (2014):**

**Resolving ancient Radiations: Can complete Plastid Gene sets elucidate deep Relationships among the tropical Gingers (Zingiberales)?**

In: *Annals of Botany* 113 (1), p. 119–133. DOI: 10.1093/aob/mct264.

DENG, JIABIN; GAO, GANG; ZHANG, YAN; HE, FENGMEI; LUO, XUQIANG; ZHANG, FENGTAI ET AL. (2016):  
**Phylogenetic and ancestral Area Reconstruction of Zingiberales from Plastid Genomes.**

In: *Biochemical Systematics and Ecology* 66, p. 123–128. DOI: 10.1016/j.bse.2016.03.013.

## Capparaceae

CORNEJO, XAVIER; ILTIS, HUGH H. (2006):

**New Combinations in Capparaceae sensu stricto for Flora of Ecuador.**

In: *Harvard Papers in Botany* 11 (1), p. 17–18. DOI: 10.3100/1043-4534(2006)11[17:NCICSS]2.0.CO;2.

CORNEJO, XAVIER; ILTIS, HUGH H. (2008):

**The Reinstatement of *Capparidastrum* (Capparaceae).**

In: *Harvard Papers in Botany* 13 (2), p. 229–236. DOI: 10.3100/1043-4534-13.2.229.

CORNEJO, XAVIER; ILTIS, HUGH H.; CERÓN, CARLOS E. (2014):

***Capparidastrum tafallanum* (Capparaceae), a new Species from the Northwestern Andean Slopes of Ecuador.**

In: *Harvard Papers in Botany* 19 (2), p. 189–191. DOI: 10.3100/hpib.v19iss2.2014.n4.

HALL, JOCELYN C. (2008):

**Systematics of Capparaceae and Cleomaceae: an Evaluation of the generic Delimitations of *Capparis* and *Cleome* using Plastid DNA Sequence Data.**

In: *Botany* 86 (7), p. 682–696. DOI: 10.1139/B08-026.

HALL, JOCELYN C.; SYTSMA, KENNETH J.; ILTIS, HUGH H. (2002):

**Phylogeny of Capparaceae and Brassicaceae based on Chloroplast Sequence Data.**

In: *American Journal of Botany* 89 (11), p. 1826–1842. DOI: 10.3732/ajb.89.11.1826.

ILTIS, HUGH H.; CORNEJO, XAVIER (2007):

**Studies in the Capparaceae XXX: *Capparicordis*, a new Genus from the Neotropics.**

In: *Botanical Journal of the Linnean Society* 59 (3), p. 245–254. DOI: 10.1663/0007-196X(2007)59[245:SITCXC]2.0.CO;2.

ILTIS, HUGH H.; HALL, JOCELYN C.; COCHRANE, THEODORE S.; SYTSMA, KENNETH J. (2011):

**Studies in the Cleomaceae I. on the Separate Recognition of Capparaceae, Cleomaceae, and Brassicaceae.**

In: *Annals of the Missouri Botanical Garden* 98 (1), p. 28–36. DOI: 10.3417/2007017.

## Capparidales

CARDINAL-McTEAGUE, WARREN M.; SYTSMA, KENNETH J.; HALL, JOCELYN C. (2016):

**Biogeography and Diversification of Brassicales: A 103-Million Year Tale.**

In: *Molecular Phylogenetics and Evolution* 99, p. 204–224. DOI: 10.1016/j.ympev.2016.02.021.

## Caprifoliaceae

BELL, CHARLES D. (2010):

**Towards a Species Level Phylogeny of *Symphoricarpos* (Caprifoliaceae), based on Nuclear and Chloroplast DNA.**

In: *Systematic Botany* 35 (2), p. 442–450. DOI: 10.1600/036364410791638351.

JACOBS, BART; GEUTEN, KOEN; PYCK, NANCY; HUYSMANS, SUZY; JANSEN, STEVEN; SMETS, ERIK (2011):

**Unraveling the Phylogeny of *Heptacodium* and *Zabelia* (Caprifoliaceae): An interdisciplinary Approach.**

In: *Systematic Botany* 36 (1), p. 231–252. DOI: 10.1600/036364411X553306.

LANDREIN, SVEN (2010):

***Diabelia*, a new Genus of Tribe Linnaeae Subtribe Linnaeinae (Caprifoliaceae).**

In: Phytotaxa 3, p. 34–38.

LANDREIN, SVEN; PRENNER, GERHARD (2013):

**Unequal Twins? Inflorescence Evolution in the Twinflower Tribe Linnaeae (Caprifoliaceae s.l.).**

In: International Journal of Plant Sciences 174 (2), p. 200–233. DOI: 10.1086/668251.

THEIS, NINA; DONOGHUE, MICHAEL J.; LI, JIAN-HUA (2008):

**Phylogenetics of the Caprifolieae and *Lonicera* (Dipsacales) based on Nuclear and Chloroplast DNA Sequences.**

In: Systematic Botany 33 (4), p. 776–783. DOI: 10.1600/036364408786500163.

WANG, QINGXIA; QUAN, QINGMEI; ZHOU, XUELI; ZHU, YUNGUO; LAN, YUNLONG; LI, SHAN ET AL. (2014):

**A comparative Study of *Lonicera japonica* with related species: morphological characteristics, ITS Sequences and active Compounds.**

In: Biochemical Systematics and Ecology 54, p. 198–207. DOI: 10.1016/j.bse.2014.02.002.

## Cardiopteridaceae

MUNZINGER, JÉRÔME; LEVIONNOIS, SEBASTIEN (2016):

**Novitates Neocaledonicae III: A new Species of *Citronella* (Cardiopteridaceae) endemic to New Caledonia.**

In: Phytotaxa 245 (3), p. 223. DOI: 10.11646/phytotaxa.245.3.5.

TOBE, HIROSHI (2012):

**Floral Structure of *Cardiopteris* (Cardiopteridaceae) with special Emphasis on the Gynoecium: systematic and evolutionary Implications.**

In: Journal of Plant Research 125 (3), p. 361–369. DOI: 10.1007/s10265-011-0450-x.

## Caricaceae

ANTUNES CARVALHO, FERNANDA; FILER, DENIS; RENNER, SUSANNE P. (2015):

**Taxonomy in the electronic Age and an E-monograph of the Papaya Family (Caricaceae) as an Example.**

In: Cladistics 31 (3), p. 321–329. DOI: 10.1111/cl.12095.

CARVALHO, FERNANDA ANTUNES; RENNER, SUSANNE P. (2012):

**A dated Phylogeny of the Papaya Family (Caricaceae) reveals the crop's closest relatives and the Family's biogeographic History.**

In: Molecular Phylogenetics and Evolution 65 (1), p. 46–53. DOI: 10.1016/j.ympev.2012.05.019.

KYNDT, TINA; ROMEIJN-PEETERS, ELIZA; VAN DROOGENBROECK, BART; ROMERO-MOTOCHI, JOSÉ PARCEMON; GHEYSEN, GODELIEVE; GOETGHEBEUR, PAUL (2005):

**Species Relationships in the Genus *Vasconcellea* (Caricaceae) based on molecular and morphological Evidence.**

In: American Journal of Botany 92 (6), p. 1033–1044. DOI: 10.3732/ajb.92.6.1033.

KYNDT, TINA; VAN DROOGENBROECK, BART; ROMEIJN-PEETERS, ELIZA; ROMERO-MOTOCHI, JOSÉ PARCEMON; SCHELDAMAN, XAVIER; GOETGHEBEUR, PAUL ET AL. (2005):

**Molecular Phylogeny and Evolution of Caricaceae based on rDNA internal transcribed Spacers and Chloroplast Sequence Data.**

In: Molecular Phylogenetics and Evolution 37 (2), p. 442–459. DOI: 10.1016/j.ympev.2005.06.017.

## Caryophyllaceae

- ADAMS, LAURIE G.; WEST, JUDY G.; COWLEY, KIRSTEN J. (2008):  
**Revision of *Spergularia* (Caryophyllaceae) in Australia.**  
In: Australian Systematic Botany 21 (4), p. 251–270. DOI: 10.1071/SB08015.
- AYDIN, ZEYNEP; ERTEKIN, ALAATTIN SELÇUK; LÄNGSTRÖM, ELISABETH; OXELMAN, BENGT (2014):  
**A new Section of *Silene* (Caryophyllaceae) including a new Species from South Anatolia, Turkey.**  
In: Phytotaxa 178 (2), p. 98. DOI: 10.11646/phytotaxa.178.2.2.
- BACCHETTA, GIANLUIGI; BRULLO, SALVATORE; CASTI, MAURO; PIETRO GIUSSO DEL GALDO, GIAN (2010):  
**Taxonomic Revision of the *Dianthus sylvestris* Group (Caryophyllaceae) in central-southern Italy, Sicily and Sardinia.**  
In: Nordic Journal of Botany 28 (2), p. 137–173. DOI: 10.1111/j.1756-1051.2009.00459.x.
- CIRES, EDUARDO; FERNÁNDEZ PRIETO, JOSÉ ANTONIO (2015):  
**Phylogenetic Relationships of *Petrocoptis* A. Braun ex Endl. (Caryophyllaceae), a discussed Genus from the Iberian Peninsula.**  
In: Journal of Plant Research 128 (2), p. 223–238. DOI: 10.1007/s10265-014-0691-6.
- DILLENBERGER, MARKUS S.; KADEREIT, JOACHIM W. (2014):  
**Maximum polyphyly: Multiple Origins and Delimitation with plesiomorphic Characters require a new Circumscription of *Minuartia* (Caryophyllaceae).**  
In: Taxon 63 (1), p. 64–88. DOI: 10.12705/631.5.
- DILLENBERGER, MARKUS S.; KADEREIT, JOACHIM W. (2017):  
**Simultaneous Speciation in the European high mountain flowering plant Genus *Facchinia* (*Minuartia* s.l., Caryophyllaceae) revealed by Genotyping-by-Sequencing.**  
In: Molecular Phylogenetics and Evolution 112, p. 23–35. DOI: 10.1016/j.ympev.2017.04.016.
- ERIXON, PER; OXELMAN, BENGT (2008):  
**Reticulate or Tree-like Chloroplast DNA Evolution in Sileneae (Caryophyllaceae)?**  
In: Molecular Phylogenetics and Evolution 48 (1), p. 313–325. DOI: 10.1016/j.ympev.2008.04.015.
- FIOR, SIMONE; KARIS, PER OLA (2007):  
**Phylogeny, Evolution and Systematics of *Moehringia* (Caryophyllaceae) as inferred from molecular and morphological Data: a case of homology Reassessment.**  
In: Cladistics 23 (4), p. 362–372. DOI: 10.1111/j.1096-0031.2007.00150.x.
- FIOR, SIMONE; KARIS, PER OLA; CASAZZA, GABRIELE; MINUTO, LUIGI; SALA, FRANCESCO (2006):  
**Molecular Phylogeny of the Caryophyllaceae (Caryophyllales) inferred from Chloroplast matK and nuclear rDNA ITS Sequences.**  
In: American Journal of Botany 93 (3), p. 399–411. DOI: 10.3732/ajb.93.3.399.
- FRAJMAN, BOŽO; EGGENS, FRIDA; OXELMAN, BENGT (2009):  
**Hybrid Origins and homoploid reticulate Evolution within *Heliosperma* (Sileneae, Caryophyllaceae) - a multigene phylogenetic approach with relative dating.**  
In: Systematic Biology 58 (3), p. 328–345. DOI: 10.1093/sysbio/syp030.
- FRAJMAN, BOŽO; HEIDARI, NAHID; OXELMAN, BENGT (2009):  
**Phylogenetic Relationships of *Atocion* and *Viscaria* (Sileneae, Caryophyllaceae) inferred from Chloroplast, nuclear ribosomal, and low-copy Gene DNA Sequences.**  
In: Taxon 58 (3), p. 811–824.
- FRAJMAN, BOŽO; OXELMAN, BENGT (2007):



**Reticulate Phylogenetics and phylogeographical Structure of *Heliosperma* (Sileneae, Caryophyllaceae) inferred from Chloroplast and nuclear DNA Sequences.**

In: Molecular Phylogenetics and Evolution 43 (1), p. 140–155. DOI: 10.1016/j.ympev.2006.11.003.

**GREENBERG, ANNE K.; DONOGHUE, MICHAEL J. (2011):**

**Molecular Systematics and Character Evolution in Caryophyllaceae.**

In: Taxon 60 (6), p. 1637–1652.

**HARBAUGH, DANICA T.; NEPOKROEFF, MOLLY; RABELER, RICHARD K.; MCNEILL, JOHN; ZIMMER, ELIZABETH A.; WAGNER, WARREN L. (2010):**

**A new Lineage-Based Tribal Classification of the Family Caryophyllaceae.**

In: International Journal of Plant Sciences 171 (2), p. 185–198. DOI: 10.1086/648993.

**KOOL, ANNELEEN; BENGTON, ANNIKA; THULIN, MATS (2007):**

**Polyphyly of *Polycarpon* (Caryophyllaceae) inferred from DNA Sequence Data.**

In: Taxon 56 (3), p. 775–782. DOI: 10.2307/25065860.

**KOOL, ANNELEEN; PERRIGO, ALLISON; THULIN, MATS (2012):**

**Bristly versus juicy: phylogenetic Position and Taxonomy of *Sphaerocoma* (Caryophyllaceae).**

In: Taxon 61 (1), p. 67–75.

**LEUZINGER, MARIANNE; NACIRI, YAMAMA; DU PASQUIER, PIERRE-EMMANUEL; JEANMONOD, DANIEL (2015):**

**Molecular diversity, Phylogeography and genetic Relationships of the *Silene paradoxa* Group of Section *Siphonomorpha* (Caryophyllaceae).**

In: Plant Systematics and Evolution 301 (1), p. 265–278. DOI: 10.1007/s00606-014-1071-3.

**MONTESINOS, DANIEL BERNARDO; KOOL, ANNELEEN (2015):**

***Arenaria acaulis* (Caryophyllaceae), a new Species from South Peru.**

In: Phytotaxa 220 (1), p. 77. DOI: 10.11646/phytotaxa.220.1.7.

**MOORE, ABIGAIL J.; DILLENBERGER, MARKUS P. (2017):**

**A conspectus of the Genus *Cherleria* (*Minuartia* s.l., Caryophyllaceae ).**

In: Willdenowia 47 (1), p. 5–14. DOI: 10.3372/wi.47.47101.

**MOSYAKIN, SERGEI L.; FEDORONCHUK, MYKOLA M. (2015):**

**New Combinations for East European Species of *Sabulina* (Caryophyllaceae).**

In: Phytotaxa 231 (1), p. 95. DOI: 10.11646/phytotaxa.231.1.10.

**NIKETIC, MARJAN; SILJAK-YAKOVLEV, SONJA; FRAJMAN, BOŽO; LAZAREVIC, MAJA; STEVANOVIC, BRANCA; TOMOVIĆ, GORDANA; STEVANOVIĆ, VLADIMIR (2013):**

**Towards resolving the Systematics of *Cerastium* subsection *Cerastium* (Caryophyllaceae): a cytogenetic approach.**

In: Botanical Journal of the Linnean Society 172, p. 205–224.

**OXELMAN, BENGT; LIÉN, M.; RABELER, RICHARD K.; POPP, MAGNUS (2001):**

**A revised generic Classification of the Tribe Sileneae (Caryophyllaceae).**

In: Nordic Journal of Botany 20, p. 743–748.

**PETRI, ANNA; OXELMAN, BENGT (2011):**

**Phylogenetic Relationships within *Silene* (Caryophyllaceae) Section *Physolychnis*.**

In: Taxon 60 (4), p. 953–968.

**PIRANI, ATEFEH; ZARRE, SHAHIN; PFEIL, BERNARD E.; BERTRAND, YANN J.K.; ASSADI, MOSTAFA; OXELMAN, BENGT (2014):**

**Molecular Phylogeny of *Acanthophyllum* (Caryophyllaceae: Caryophylleae), with Emphasis on infrageneric Classification.**

In: *Taxon* 63 (3), p. 592–607. DOI: 10.12705/633.39.

**POPP, MAGNUS; ERIXON, PER; EGGENS, FRIDA; OXELMAN, BENGT (2005):**

**Origin and Evolution of a Circumpolar Polyploid Species Complex in *Silene* (Caryophyllaceae) inferred from Low Copy Nuclear RNA Polymerase Introns, rDNA, and Chloroplast DNA.**

In: *Systematic Botany* 30 (2), p. 302–313.

**POPP, MAGNUS; GIZAW, ABEL; NEMOMISSA, SILESHI; SUDA, JAN; BROCHMANN, CHRISTIAN (2008):**

**Original Article: Colonization and Diversification in the African ‘sky Islands’ by Eurasian *Lychnis* L. (Caryophyllaceae).**

In: *Journal of Biogeography* 35 (6), p. 1016–1029. DOI: 10.1111/j.1365-2699.2008.01902.x.

**POPP, MAGNUS; OXELMAN, BENGT (2004):**

**Evolution of a RNA polymerase Gene Family in *Silene* (Caryophyllaceae)-incomplete concerted Evolution and topological Congruence among Paralogues.**

In: *Systematic Biology* 53 (6), p. 914–932. DOI: 10.1080/10635150490888840.

**POPP, MAGNUS; OXELMAN, BENGT (2007):**

**Origin and Evolution of North American polyploid *Silene* (Caryophyllaceae).**

In: *American Journal of Botany* 94 (3), p. 330–349. DOI: 10.3732/ajb.94.3.330.

**RABELER, RICHARD K.; WAGNER, WARREN L. (2016):**

**New Combinations in *Odontostemma* (Caryophyllaceae).**

In: *PhytoKeys* (63), p. 77–97. DOI: 10.3897/phytokeys.63.8181.

**RAUTENBERG, ANJA; FILATOV, DMITRY; SVENNLAD, BODIL; HEIDARI, NAHID; OXELMAN, BENGT (2008):**

**Conflicting phylogenetic signals in the SIX1/Y1 Gene in *Silene*.**

In: *BMC Evolutionary Biology* 8, p. 299. DOI: 10.1186/1471-2148-8-299.

**RAUTENBERG, ANJA; HATHAWAY, LOUISE; OXELMAN, BENGT; PRENTICE, HONOR C. (2010):**

**Geographic and phylogenetic Patterns in *Silene* Section *Melandrium* (Caryophyllaceae) as inferred from Chloroplast and nuclear DNA Sequences.**

In: *Molecular Phylogenetics and Evolution* 57 (3), p. 978–991. DOI: 10.1016/j.ympev.2010.08.003.

**SADEGHIAN, SOMAYEH; ZARRE, SHAHIN; RABELER, RICHARD K.; HEUBL, GÜNTHER (2015):**

**Molecular phylogenetic Analysis of *Arenaria* (Caryophyllaceae: Tribe Arenarieae) and its allies inferred from nuclear DNA Internal Transcribed Spacer and Plastid DNA *rps16* Sequences.**

In: *Botanical Journal of the Linnean Society* 178 (4), p. 648–669. DOI: 10.1111/boj.12293.

**SCHEEN, ANNE-CATHRINE; BROCHMANN, CHRISTIAN; BRYSTING, ANNE K.; ELVEN, REIDAR; MORRIS, ASHLEY; SOLTIS, DOUGLAS E. ET AL. (2004):**

**Northern hemisphere Biogeography of *Cerastium* (Caryophyllaceae): Insights from phylogenetic Analysis of noncoding plastidnucleotide Sequences.**

In: *American Journal of Botany* 91 (6), p. 943–952. DOI: 10.3732/ajb.91.6.943.

**SLOAN, DANIEL B.; OXELMAN, BENGT; RAUTENBERG, ANJA; TAYLOR, DOUGLAS R. (2009):**

**Phylogenetic Analysis of mitochondrial substitution Rate Variation in the Angiosperm Tribe Sileneae.**

In: *BMC Evolutionary Biology* 9, p. 260. DOI: 10.1186/1471-2148-9-260.

SLOAN, DANIEL B.; TRIANT, DEBORAH A.; FORRESTER, NICOLE J.; BERGNER, LAURA M.; WU, MARTIN; TAYLOR, DOUGLAS R. (2014):

**A recurring Syndrome of accelerated Plastid Genome Evolution in the Angiosperm Tribe Sileneae (Caryophyllaceae).**

In: *Molecular Phylogenetics and Evolution* 72, p. 82–89. DOI: 10.1016/j.ympev.2013.12.004.

SMISSEN, ROB D.O.B.; CLEMENT, JOHN C.; GARNOCK-JONES, PHILIP J.; CHAMBERS, GEOFFREY K. (2002):

**Subfamilial Relationships within Caryophyllaceae as inferred from 5' ndhF Sequences.**

In: *American Journal of Botany* 89 (8), p. 1336–1341. DOI: 10.3732/ajb.89.8.1336.

VAEZI, JAMIL; BEHROOZIAN, MARYAM; MEMARIANI, FARSHID; JOHARCHI, MOHAMMAD REZA (2014):

***Dianthus pseudocrinitus* (Caryophyllaceae), a new Species from Northeast of Iran identified by morphological and molecular Data.**

In: *Phytotaxa* 156 (2), p. 59. DOI: 10.11646/phytotaxa.156.2.1.

VALCÁRCEL, VIRGINIA; VARGAS, PABLO; FELINER, GONZALO NIETO (2006):

**Phylogenetic and Phylogeographic Analysis of the Western Mediterranean *Arenaria* Section *Plinthine* (Caryophyllaceae) based on Nuclear, Plastid, and morphological Markers.**

In: *Taxon* 55 (2), p. 297–312. DOI: 10.2307/25065579.

WILLYARD, ANN; WALLACE, LISA E.; WAGNER, WARREN L.; WELLER, STEPHEN G.; SAKAI, ANN K.; NEPOKROEFF, MOLLY (2011):

**Estimating the Species Tree for Hawaiian *Schiedea* (Caryophyllaceae) from multiple loci in the presence of reticulate Evolution.**

In: *Molecular Phylogenetics and Evolution* 60 (1), p. 29–48. DOI: 10.1016/j.ympev.2011.04.001.

## Caryophyllales

BROCKINGTON, SAMUEL F.; ALEXANDRE, ROOLSE; RAMDIAL, JEREMY; MOORE, MICHAEL J.; CRAWLEY, SUNNY S.; DHINGRA, AMIT ET AL. (2009):

**Phylogeny of the Caryophyllales sensu lato: Revisiting Hypotheses on Pollination Biology and Perianth Differentiation in the Core Caryophyllales.**

In: *International Journal of Plant Sciences* 170 (5), p. 627–643. DOI: 10.1086/597785.

BROCKINGTON, SAMUEL F.; YANG, YA; GANDIA-HERRERO, FERNANDO; COVSHOFF, SARAH; HIBBERD, JULIAN M.; SAGE, ROWAN F. ET AL. (2015):

**Lineage-specific Gene Radiations underlie the Evolution of novel Betalain Pigmentation in Caryophyllales.**

In: *the new Phytologist* 207 (4), p. 1170–1180. DOI: 10.1111/nph.13441.

CRAWLEY, SUNNY S.; HILU, KHIDIR W. (2012):

**Impact of missing Data, Gene choice, and Taxon Sampling on phylogenetic reconstruction: the Caryophyllales (Angiosperms).**

In: *Plant Systematics and Evolution* 298 (2), p. 297–312. DOI: 10.1007/s00606-011-0544-x.

CUÉNOUD, PHILIPPE; SAVOLAINEN, VINCENT; CHATROU, LARS W.; POWELL, MARTYN P.; GRAYER, RENÉE J.; CHASE, MARK W. (2002):

**Molecular Phylogenetics of Caryophyllales based on nuclear 18s rDNA and Plastid *rbcl*, *atpB*, and *matK* DNA Sequences.**

In: *American Journal of Botany* 89 (1), p. 132–144. DOI: 10.3732/ajb.89.1.132.

HERNÁNDEZ-LEDESMA, PATRICIA; BERENDSOHN, WALTER G.; BORSCH, THOMAS; MERING, SABINE; AKHANI, HOSSEIN; ARIAS, SALVADOR ET AL. (2015):

**A taxonomic backbone for the global synthesis of Species Diversity in the Angiosperm Order Caryophyllales.**

In: Willdenowia 45 (3), p. 281. DOI: 10.3372/wi.45.45301.

**MOORE, ABIGAIL J.; VOS, JURRIAN M. DE; HANCOCK, LILLIAN P.; GOOLSBY, ERIC; EDWARDS, ERIKA J. (2018):**

**Targeted Enrichment of Large Gene Families for phylogenetic Inference: Phylogeny and molecular Evolution of Photosynthesis Genes in the *Portullugo* Clade (Caryophyllales).**

In: Systematic Biology 67 (3), p. 367–383. DOI: 10.1093/sysbio/syx078.

**OCAMPO, GILBERTO; COLUMBUS, TRAVIS J. (2010):**

**Molecular Phylogenetics of Suborder Cactineae (Caryophyllales), including Insights into photosynthetic Diversification and historical Biogeography.**

In: American Journal of Botany 97 (11), p. 1827–1847. DOI: 10.3732/ajb.1000227.

## Casuarinaceae

**ROSE, PHILLIP F.; WILSON, KAREN L.; TELFORD, IAN R.H.; LAMONT, ROBERT W.; BRUHL, JEREMY J. (2014):**

**Multiple lines of Evidence clarify limits of *Allocasuarina thalassoscopica*, *A. defungens* and *A. littoralis* (*Allocasuarina* Sect. *Cylindropitys*, Casuarinaceae).**

In: Australian Systematic Botany 27 (4), p. 257–281. DOI: 10.1071/SB14009.

**SOGO, AKIKO; SETOGUCHI, HIROAKI; NOGUCHI, JUNKO; JAFFRÉ, TANGUY; TOBE, HIROSHI (2001):**

**Molecular Phylogeny of Casuarinaceae based on *rbcl* and *matK* Gene Sequences.**

In: Journal of Plant Research 114 (4), p. 459–464. DOI: 10.1007/PL00014011.

**STEANE, DOROTHY A.; WILSON, KAREN L.; HILL, ROBERT P. (2003):**

**Using *matK* Sequence Data to unravel the Phylogeny of Casuarinaceae.**

In: Molecular Phylogenetics and Evolution 28 (1), p. 47–59. DOI: 10.1016/S1055-7903(03)00028-9.

## Celastraceae

**BACON, CHRISTINE D.; SIMMONS, MARK P.; ARCHER, ROBERT H.; ZHAO, LIANG-CHENG; ANDRIANTIANA, JACKY L. (2016):**

**Biogeography of the Malagasy Celastraceae: Multiple independent Origins followed by widespread Dispersal of Genera from Madagascar.**

In: Molecular Phylogenetics and Evolution 94 (Pt A), p. 365–382. DOI: 10.1016/j.ympev.2015.09.013.

**BIRAL, LEONARDO; SMIDT, ERIC DE CAMARGO; BOLSON, MÔNICA; LOMBARDI, JULIO ANTONIO (2015):**

**A new Species of *Maytenus* (Celastraceae) from the Brazilian Atlantic Forest, with Evidence of molecular Phylogeny, and two new Synonyms for *Maytenus floribunda*.**

In: Phytotaxa 231 (1), p. 53. DOI: 10.11646/phytotaxa.231.1.5.

**COUGHENOUR, JENNIFER M.; SIMMONS, MARK P.; LOMBARDI, JULIO ANTONIO; YAKOBSON, KENDRA; ARCHER, ROBERT H. (2011):**

**Phylogeny of Celastraceae Subfamily Hippocrateoideae inferred from morphological Characters and nuclear and Plastid Loci.**

In: Molecular Phylogenetics and Evolution 59 (2), p. 320–330. DOI: 10.1016/j.ympev.2011.02.017.

**COUGHENOUR, JENNIFER M.; SIMMONS, MARK P.; LOMBARDI, JULIO ANTONIO; CAPPA, JENNIFER J. (2010):**

**Phylogeny of Celastraceae Subfamily Salacioideae and Tribe Lophopetaleae inferred from morphological Characters and Nuclear and Plastid Genes.**

In: Systematic Botany 35 (2), p. 358–367. DOI: 10.1600/036364410791638289.

**DARBYSHIRE, IAIN; SIMMONS, MARK P.; CAPPA, JENNIFER J.; BRETELER, FRANS J.; BUERKI, SVEN (2016):**

***Pleurostyliia serrulata* and two allied new Species from Africa are actually members of the New World *Crossopetalum* (Celastraceae).**

In: Systematic Botany 41 (4), p. 851–864. DOI: 10.1600/036364416X693955.

ISLAM, MELISSA BAUER; SIMMONS, MARK P.; ARCHER, ROBERT H. (2006):

**Phylogeny of the *Elaeodendron* Group (Celastraceae) inferred from morphological Characters and Nuclear and Plastid Genes.**

In: Systematic Botany 31 (3), p. 512–524.

LI, YAN-NAN; XIE, LEI; LI, JIN-YU; ZHANG, ZHI-XIANG (2014):

**Phylogeny of *Euonymus* inferred from molecular and morphological Data.**

In: Journal of Systematics and Evolution 52 (2), p. 149–160. DOI: 10.1111/jse.12068.

MU, XIAN-YUN; ZHAO, LIANG-CHENG; ZHANG, ZHI-XIANG (2012):

**Phylogeny of *Celastrus* L. (Celastraceae) inferred from two nuclear and three Plastid Markers.**

In: Journal of Plant Research 125 (5), p. 619–630. DOI: 10.1007/s10265-012-0484-8.

SIMMONS, MARK P.; BARRIE, FRED R. (2014):

***Haydenoxylon*, a Replacement Name for *Haydenia* (Celastraceae).**

In: Novon: A Journal for Botanical Nomenclature 23 (2), p. 224–225. DOI: 10.3417/2014011.

SIMMONS, MARK P.; CAPP, JENNIFER J.; ARCHER, ROBERT H.; FORD, ANDREW J.; EICHSTEDT, DEDRA; CLEVINGER, CURTIS C. (2008):

**Phylogeny of the Celastreae (Celastraceae) and the Relationships of *Catha edulis* (qat) inferred from morphological Characters and nuclear and Plastid Genes.**

In: Molecular Phylogenetics and Evolution 48 (2), p. 745–757. DOI: 10.1016/j.ympev.2008.04.039.

SIMMONS, MARK P.; CLEVINGER, CURTIS C.; SAVOLAINEN, VINCENT; ARCHER, ROBERT H.; MATHEWS, SARAH; DOYLE, JEFF J. (2001):

**Phylogeny of the Celastraceae inferred from phytochrome B Gene Sequence and Morphology.**

In: American Journal of Botany 88 (2), p. 313–325. DOI: 10.2307/2657021.

SIMMONS, MARK P.; MCKENNA, MILES J.; BACON, CHRISTINE D.; YAKOBSON, KENDRA; CAPP, JENNIFER J.; ARCHER, ROBERT H.; FORD, ANDREW J. (2012):

**Phylogeny of Celastraceae Tribe Euomyeae inferred from morphological Characters and nuclear and Plastid Genes.**

In: Molecular Phylogenetics and Evolution 62 (1), p. 9–20. DOI: 10.1016/j.ympev.2011.08.022.

SIMMONS, MARK P.; SAVOLAINEN, VINCENT; CLEVINGER, CURTIS C.; ARCHER, ROBERT H.; DAVIS, J. I. (2001):

**Phylogeny of the Celastraceae inferred from 26s nuclear ribosomal DNA, Phytochrome B, *rbcl*, *atpB*, and Morphology.**

In: Molecular Phylogenetics and Evolution 19 (3), p. 353–366. DOI: 10.1006/mpev.2001.0937.

## **Celastrales**

ZHANG, LI-BING; SIMMONS, MARK P. (2006):

**Phylogeny and Delimitation of the Celastrales inferred from Nuclear and Plastid Genes.**

In: Systematic Botany 31 (1), p. 122–137.

## **Centrolepidaceae**

SOKOLOFF, DMITRY D.; REMIZOWA, MARGARITA V.; BARRETT, MATTHEW D.; CONRAN, JOHN G.; RUDALL, PAULA J. (2015):

**Morphological Diversity and Evolution of Centrolepidaceae (Poales), a species-poor Clade with diverse body plans and developmental Patterns.**

In: *American Journal of Botany* 102 (8), p. 1219–1249. DOI: 10.3732/ajb.1400434.

## **Chloranthaceae**

ANTONELLI, ALEXANDRE; SANMARTÍN, ISABEL (2011):

**Mass extinction, gradual Cooling, or rapid Radiation? Reconstructing the spatiotemporal Evolution of the ancient Angiosperm Genus *Hedyosmum* (Chloranthaceae) using empirical and simulated Approaches.**

In: *Systematic Biology* 60 (5), p. 596–615. DOI: 10.1093/sysbio/syr062.

DOYLE, JAMES A.; ENDRESS, PETER K. (2014):

**Integrating Early Cretaceous Fossils into the Phylogeny of Living Angiosperms. ANITA Lines and Relatives of Chloranthaceae.**

In: *International Journal of Plant Sciences* 175 (5), p. 555–600. DOI: 10.1086/675935.

KONG, HONG-ZHI; CHEN, ZHI-DUAN; LU, AN-MING (2002):

**Phylogeny of *Chloranthus* (Chloranthaceae) based on nuclear ribosomal ITS and Plastid TrnL-f Sequence Data.**

In: *American Journal of Botany* 89 (6), p. 940–946. DOI: 10.3732/ajb.89.6.940.

ZHANG, LI-BING; RENNER, SUSANNE P. (2003):

**The deepest splits in Chloranthaceae as resolved by Chloroplast Sequences.**

In: *International Journal of Plant Sciences* 164 (5), p. 383–392.

## **Chrysophyllaceae**

BARDON, LÉA; CHAMAGNE, JULIETTE; DEXTER, KYLE G.; SOTHERS, CYNTHIA A.; PRANCE, GHILLEAN T.; CHAVE, JÉRÔME (2013):

**Origin and Evolution of Chrysobalanaceae: Insights into the Evolution of plants in the Neotropics.**

In: *Botanical Journal of the Linnean Society* 171, p. 19–37.

BARDON, LÉA; SOTHERS, CYNTHIA A.; PRANCE, GHILLEAN T.; MALÉ, PIERRE-JEAN G.; XI, ZHENXIANG; DAVIS, CHARLES C. ET AL. (2016):

**Unraveling the biogeographical History of Chrysobalanaceae from Plastid Genomes.**

In: *American Journal of Botany* 103 (6), p. 1089–1102. DOI: 10.3732/ajb.1500463.

SOTHERS, CYNTHIA A.; PRANCE, GHILLEAN T.; BUERKI, SVEN; KOK, ROGIER P.J. DE; CHASE, MARK W. (2014):

**Taxonomic novelties in Neotropical Chrysobalanaceae: towards a monophyletic *Couepia*.**

In: *Phytotaxa* 172 (3), p. 176. DOI: 10.11646/phytotaxa.172.3.2.

YAKANDAWALA, DEEPTHI; MORTON, CYNTHIA M.; PRANCE, GHILLEAN T. (2010):

**Phylogenetic Relationships of the Chrysobalanaceae inferred from Chloroplast, Nuclear, and morphological Data.**

In: *Annals of the Missouri Botanical Garden* 97 (2), p. 259–281. DOI: 10.3417/2007175.

## **Cistaceae**

CIVEYREL, LAURE; LECLERCQ, JULIE; DEMOLY, JEAN-PIERRE; AGNAN, YANNICK; QUÈBRE, NICOLAS; PÉLISSIER, CÉLINE; OTTO, THIERRY (2011):

**Molecular Systematics, Character Evolution, and Pollen Morphology of *Cistus* and *Halimium* (Cistaceae).**

In: *Plant Systematics and Evolution* 295 (1-4), p. 23–54. DOI: 10.1007/s00606-011-0458-7.

GUZMÁN, BEATRIZ; VARGAS, PABLO (2005):

**Systematics, Character Evolution, and Biogeography of *Cistus* L. (Cistaceae) based on ITS, trnL-trnF, and matK Sequences.**

In: *Molecular Phylogenetics and Evolution* 37 (3), p. 644–660. DOI: 10.1016/j.ympev.2005.04.026.

GUZMÁN, BEATRIZ; VARGAS, PABLO (2009):

**Historical Biogeography and Character Evolution of Cistaceae (Malvales) based on Analysis of Plastid *rbcl* and *trnL-trnF* Sequences.**

In: *Organisms Diversity and Evolution* 9 (2), p. 83–99. DOI: 10.1016/j.ode.2009.01.001.

## Cleomaceae

FEODOROVA, TATIANA A.; VOZNESENSKAYA, ELENA V.; EDWARDS, GERALD E.; ROALSON, ERIC H. (2010):

**Biogeographic Patterns of Diversification and the Origins of C4 in *Cleome* (Cleomaceae).**

In: *Systematic Botany* 35 (4), p. 811–826. DOI: 10.1600/036364410X539880.

INDA, LUIS A.; TORRECILLA, PEDRO; CATALÁN, PILAR; RUIZ-ZAPATA, THIRZA (2008):

**Phylogeny of *Cleome* L. and its close relatives *Podandrogynne* Ducke and *Polanisia* Raf. (Cleomoideae, Cleomaceae) based on Analysis of nuclear ITS Sequences and Morphology.**

In: *Plant Systematics and Evolution* 274 (1-2), p. 111–126. DOI: 10.1007/s00606-008-0026-y.

PATCHELL, MELANIE J.; ROALSON, ERIC H.; HALL, JOCELYN C. (2014):

**Resolved Phylogeny of Cleomaceae based on all three Genomes.**

In: *Taxon* 63 (2), p. 315–328. DOI: 10.12705/632.17.

RISER, JAMES P.; CARDINAL-McTEAGUE, WARREN M.; HALL, JOCELYN C.; HAHN, WILLIAM J.; SYTSMA, KENNETH J.; ROALSON, ERIC H. (2013):

**Phylogenetic Relationships among the North American cleomoids (Cleomaceae): a Test of Iltis's Reduction Series.**

In: *American Journal of Botany* 100 (10), p. 2102–2111. DOI: 10.3732/ajb.1300096.

ROALSON, ERIC H.; HALL, JOCELYN C.; RISER II, JAMES P.; CARDINAL-McTEAGUE, WARREN M.; COCHRANE, THEODORE S.; SYTSMA, KENNETH J. (2015):

**A Revision of generic Boundaries and Nomenclature in the North American cleomoid Clade (Cleomaceae).**

In: *Phytotaxa* 205 (3), p. 129. DOI: 10.11646/phytotaxa.205.3.1.

TAMBOLI, ASIF SHABODIN; PATIL, SWARNIL MAHADEO; GHOLAVE, AVINASH RAMCHANDRA; KADAM, SUHAS KISHOR; KOTIBHASKAR, SHREYA VIJAYKUMAR; YADAV, SHRIRANG RAMCHANDRA; GOVINDWAR, SANJAY PRABHU (2016):

**Phylogenetic Analysis, genetic Diversity and Relationships between the recently segregated Species of *Corynandra* and *Cleoserrata* from the Genus *Cleome* using DNA barcoding and molecular Markers.**

In: *Comptes Rendus Biologies* 339 (3-4), p. 123–132. DOI: 10.1016/j.crv.2016.02.005.

## Clethraceae

ANDERBERG, ARNE A.; ZHANG, XIAOPING (2002):

**Phylogenetic Relationships of Cyrillaceae and Clethraceae (Ericales) with special Emphasis on the Genus *Purdiaea* Planch.**

In: *Organisms Diversity and Evolution* 2 (2), p. 127–137. DOI: 10.1078/1439-6092-00036.

FIOR, SIMONE; KARIS, PER OLA; ANDERBERG, ARNE A. (2003):

**Phylogeny, Taxonomy, and Systematic Position of *Clethra* (Clethraceae, Ericales) with Notes on Biogeography: Evidence from Plastid and Nuclear DNA Sequences.**

In: International Journal of Plant Sciences 164 (6), p. 997–1006.

## Clusiaceae

**CADDAH, MAYARA KRASINSKI; CAMPOS, TATIANA; ZUCCHI, MARIA IMACULADA; SOUZA, ANETE PEREIRA; BITTRICH, VOLKER; AMARAL, MARIA DO CARMO ESTANISLAU DO (2013):**

**Species boundaries inferred from Microsatellite Markers in the *Kielmeyera coriacea* complex (Calophyllaceae) and Evidence of asymmetric Hybridization.**

In: Plant Systematics and Evolution 299 (4), p. 731–741. DOI: 10.1007/s00606-012-0755-9.

**FURNESS, CAROL A. (2012):**

**Pollen Evolution in the Clusioid Clade (Malpighiales).**

In: International Journal of Plant Sciences 173 (9), p. 1055–1082. DOI: 10.1086/667614.

**GUSTAFSSON, MATS H.G.; BITTRICH, VOLKER; STEVENS, PETER F. (2002):**

**Phylogeny of Clusiaceae based on *rbcl* Sequences.**

In: International Journal of Plant Sciences 163 (6), p. 1045–1054.

**RAJKUMAR, S.; JANARTHANAM, M.K. (2007):**

***Agasthiyamalaia* (Clusiaceae) A new Genus for *Poeciloneuron pauciflorum* an endemic and endangered Tree of Western Ghats, India.**

In: Journal of the Botanical Research Institute of Texas 1 (1), p. 129–133.

**RUHFEL, BRADLEY R.; STEVENS, PETER F.; DAVIS, CHARLES C. (2013):**

**Combined morphological and molecular Phylogeny of the Clusioid Clade (Malpighiales) and the Placement of the Ancient Rosid Macrofossil *Paleoclusia*.**

In: International Journal of Plant Sciences 174 (6), p. 910–936. DOI: 10.1086/670668.

**SWEENEY, PATRICK W. (2008):**

**Phylogeny and Floral Diversity in the Genus *Garcinia* (Clusiaceae) and Relatives.**

In: International Journal of Plant Sciences 169 (9), p. 1288–1303. DOI: 10.1086/591990.

## Codonaceae

**WEIGEND, MAXIMILIAN (2010):**

**Codonaceae - a newly required Family name in Boraginales.**

In: Phytotaxa 10, p. 26–30.

## Colchicaceae

**CASE, ANDREA L.; GRAHAM, SEAN W.; MACFARLANE, TERRY D.; BARRETT, SPENCER C. H. (2008):**

**A phylogenetic Study of evolutionary Transitions in Sexual Systems in Australasian *Wurmbea* (Colchicaceae).**

In: International Journal of Plant Sciences 169 (1), p. 141–156. DOI: 10.1086/523368.

**DEL HOYO, ALBERTO; GARCÍA-MARÍN, JOSÉ LUIS; PEDROLA-MONFORT, JOAN (2009):**

**Temporal and spatial Diversification of the African disjunct Genus *Androcymbium* (Colchicaceae).**

In: Molecular Phylogenetics and Evolution 53 (3), p. 848–861. DOI: 10.1016/j.ympev.2009.08.005.

**LEKHAK, MANOJ M.; SURVESWARAN, SIDDHARTHAN; YADAV, SHRIRANG RAMCHANDRA (2016):**

**Generic identity of *Camptorrhiza indica* (Colchicaceae) based on Cytogenetics and molecular Phylogenetics.**

In: Journal of Systematics and Evolution 54 (1), p. 75–82. DOI: 10.1111/jse.12165.

**NGUYEN, THI P. A.; KIM, JUNG SUNG; KIM, JOO-HWAN (2013):**



**Molecular phylogenetic Relationships and Implications for the Circumscription of Colchicaceae (Liliales).**

In: Botanical Journal of the Linnean Society 172 (3), p. 255–269. DOI: 10.1111/boj.12037.

**TAMURA, MINORU N.; YAMADA, MASAHIRO; FUSE, SHIZUKA; HOTA, MITSURU (2013):**

**Molecular Phylogeny and Taxonomy of the Genus *Disporum* (Colchicaceae).**

In: Acta Phytotaxonomica Geobotanica 64 (3), p. 137–147.

**Combretaceae**

**BARRETT, RUSSELL L. (2015):**

**Examining range disjunctions in Australian *Terminalia* (Combretaceae) with taxonomic Revision of the *T. canescens* and *T. cunninghamii* Species complexes.**

In: Australian Systematic Botany 28 (1), p. 23–45. DOI: 10.1071/SB14026.

**MAURIN, OLIVIER; CHASE, MARK W.; JORDAAN, MARIE; VAN DER BANK, MICHELLE (2010):**

**Phylogenetic Relationships of Combretaceae inferred from nuclear and Plastid DNA Sequence Data: Implications for generic Classification.**

In: Botanical Journal of the Linnean Society 162 (3), p. 453–476. DOI: 10.1111/j.1095-8339.2010.01027.x.

**TAN, FENGXIAO; SHI, SU-HUA; ZHONG, YANG; GONG, XUN; WANG, YUGUO (2002):**

**Phylogenetic Relationships of Combretaceae (Combretaceae) inferred from plastid, nuclear Gene and spacer Sequences.**

In: Journal of Plant Research 115 (6), p. 475–481. DOI: 10.1007/s10265-002-0059-1.

**Commelinaceae**

**AONA, LIDYANNE Y. S.; BITTRICH, VOLKER; AMARAL, MARIA DO CARMO E. (2017):**

**Taxonomic novelties in Brazilian *Dichorisandra* (Commelinaceae): *D. sagittata* sp. nov. and *D. glabrescens* stat. nov.**

In: Brittonia 69 (2), p. 209–217. DOI: 10.1007/s12228-016-9456-y.

**AONA-PINHEIRO, L.Y.S.; AMARAL, MARIA DO CARMO E. (2012):**

**Four new Species of *Dichorisandra* J.C.Mikan (Commelinaceae) from Southeast Brazil.**

In: Phytotaxa 48 (7), p. 22.

**BERGAMO, STEPHANIE (2003):**

**A phylogenetic Evaluation of *Callisia* Loefl. (Commelinaceae) based on molecular Data.**

Dissertation. University of Georgia, Athens, Georgia, USA.

**BURNS, JEAN H.; FADEN, ROBERT B.; STEPPAN, SCOTT J. (2011):**

**Phylogenetic Studies in the Commelinaceae Subfamily Commelinoideae inferred from Nuclear Ribosomal and Chloroplast DNA Sequences.**

In: Systematic Botany 36 (2), p. 268–276. DOI: 10.1600/036364411X569471.

**EVANS, TIMOTHY M.; SYTSMAN, KENNETH J.; FADEN, ROBERT B.; GIVNISH, THOMAS J. (2003):**

**Phylogenetic Relationships in the Commelinaceae: II. A cladistic Analysis of rbcL Sequences and Morphology.**

In: Systematic Botany 28 (2), p. 270–292.

**HARDY, CHRISTOPHER R.; FADEN, ROBERT B. (2004):**

***Plowmanianthus*, a new Genus of Commelinaceae with five new Species from Tropical America.**

In: Systematic Botany 29 (2), p. 316–333. DOI: 10.1600/036364404774195511.

KELLY, SHANA M.; EVANS, TIMOTHY M. (2014):

**Phylogenetic Analysis of the African Plant Genus *Aneilema* (family Commelinaceae) based on Chloroplast DNA Sequences.**

Honors Projects 285. Grand valley State University, Grand Valley.

## Convolvulaceae

BRETELER, FRANS J. (2013):

**Revision of *Calycobolus* (Convolvulaceae) in continental Africa.**

In: Plant Ecology and Evolution 146 (3), p. 328–350. DOI: 10.5091/plecevo.2013.856.

BURIL, MARIA TERESA; SIMÕES, ANA RITA; CARINE, MARK A.; ALVES, MARCCUS V. (2015):

***Daustinia*, a replacement name for *Austinia* (Convolvulaceae).**

In: Phytotaxa 197 (1), p. 60. DOI: 10.11646/phytotaxa.197.1.8.

CARINE, MARK A.; RUSSELL, STEPHEN J.; SANTOS-GUERRA, ARNOLDO; FRANCISCO-ORTEGA, JAVIER (2004):

**Relationships of the Macaronesian and Mediterranean Floras: molecular Evidence for Multiple Colonizations into Macaronesia and Back-Colonization of the Continent in *Convolvulus* (Convolvulaceae).**

In: American Journal of Botany 91 (7), p. 1070–1085.

COSTEA, MIHAI; AISTON, FIONA; STEFANOVIĆ, SAŠA (2008):

**Species Delimitation, phylogenetic Relationships, and two new Species in the *Cuscuta gracillima* complex (Convolvulaceae).**

In: Botany 86 (7), p. 670–681. DOI: 10.1139/B08-030.

COSTEA, MIHAI; RUIZ, IGNACIO GARCÍA; STEFANOVIĆ, SAŠA (2011):

**Systematics of “horned” dodders: phylogenetic Relationships, Taxonomy, and two new Species within the *Cuscuta chapalana* complex (Convolvulaceae).**

In: Botany 89 (10), p. 715–730. DOI: 10.1139/B11-049.

COSTEA, MIHAI; STEFANOVIĆ, SAŠA (2010):

**Evolutionary History and Taxonomy of the *Cuscuta umbellata* complex (Convolvulaceae): Evidence of extensive Hybridization from discordant nuclear and Plastid Phylogenies.**

In: Taxon 59 (6), p. 1783–1800.

DEMISSEW, SEBSEBE (2001):

**A Synopsis of the Genus *Merremia* (Convolvulaceae) in the Flora of Ethiopia and Eritrea.**

In: Kew Bulletin 56 (4), p. 931–943.

DEMISSEW, SEBSEBE; MILL, ROBERT R. (2009):

**Revision of the Genus *Seddera* (Convolvulaceae).**

In: Kew Bulletin 64, p. 197–233.

DUNCAN, TANYA M.; RAUSHER, MARK D. (2013):

**Morphological and genetic differentiation and reproductive Isolation among closely related Taxa in the *Ipomoea* series *Batatas*.**

In: American Journal of Botany 100 (11), p. 2183–2193. DOI: 10.3732/ajb.1200467.

ESERMAN, LAUREN A.; TILEY, GEORGE P.; JARRET, ROBERT L.; LEEBENS-MACK, JIM H.; MILLER, RICHARD E. (2014):

**Phylogenetics and Diversification of morning Glories (tribe Ipomoeae, Convolvulaceae) based on whole Plastome Sequences.**

In: American Journal of Botany 101 (1), p. 92–103. DOI: 10.3732/ajb.1300207.

- GARCÍA, MIGUEL Á.; MARTÍN, MARÍA P. (2007):**  
**Phylogeny of *Cuscuta* Subgenus *Cuscuta* (Convolvulaceae) based on nrDNA ITS and Chloroplast trnL Intron Sequences.**  
In: Systematic Botany 32 (4), p. 899–916.
- JAYASURIYA, K. M. G. GEHAN; BASKIN, JERRY M.; GENEVE, ROBERT L.; BASKIN, CAROL C. (2009):**  
**Phylogeny of Seed Dormancy in Convolvulaceae, Subfamily Convolvuloideae (Solanales).**  
In: Annals of Botany 103 (1), p. 45–63. DOI: 10.1093/aob/mcn217.
- MILLER, RICHARD E.; McDONALD, J. ANDREW; MANOS, PAUL P. (2004):**  
**Systematics of *Ipomoea* Subgenus *Quamoclit* (Convolvulaceae) based on ITS Sequence Data and A Bayesian phylogenetic Analysis.**  
In: American Journal of Botany 91 (8), p. 1208–1218.
- MILLER, RICHARD E.; RAUSHER, MARK D.; MANOS, PAUL P. (1999):**  
**Phylogenetic Systematics of *Ipomoea* (Convolvulaceae) based on ITS and Waxy Sequences.**  
In: Systematic Botany 24 (2), p. 209–227.
- PASTORE, MAYARA; SIMÃO-BIANCHINI, ROSANGELA (2015):**  
**Taxonomic novelties in *Jacquemontia* Choisy (Convolvulaceae) from Southeastern Brazil.**  
In: Phytotaxa 221 (2), p. 193. DOI: 10.11646/phytotaxa.221.2.10.
- RAJAPAKSE, SRIYANI; NILMALGODA, SASANDA D.; MOLNAR, MATTHEW; BALLARD, ROBERT E.; AUSTIN, DANIEL F.; BOHAC, JANICE R. (2004):**  
**Phylogenetic Relationships of the sweetpotato in *Ipomoea* series *Batatas* (Convolvulaceae) based on nuclear  $\beta$ -Amylase Gene Sequences.**  
In: Molecular Phylogenetics and Evolution 30 (3), p. 623–632. DOI: 10.1016/S1055-7903(03)00249-5.
- SIMÕES, ANA RITA; CULHAM, ALASTAIR; CARINE, MARK A. (2015):**  
**Resolving the unresolved Tribe: a molecular phylogenetic Framework for the Merremieae (Convolvulaceae).**  
In: Botanical Journal of the Linnean Society 179, p. 374–387.
- SIMÕES, ANA RITA; STAPLES, G. W. (2017):**  
**Dissolution of Convolvulaceae Tribe Merremieae and a new Classification of the constituent Genera.**  
In: Botanical Journal of the Linnean Society 183, p. 561–586.
- STAPLES, G. W.; BURIL, MARIA TERESA; SIMÕES, ANA RITA; GOVAERTS, RAFAEL (2015):**  
**Nomenclatural corrections in Convolvulaceae diversae.**  
In: Phytologia 97 (3), p. 219–223.
- STAPLES, GEORGE W. (2007):**  
**A Synopsis of *Rivea* (Convolvulaceae).**  
In: Edinburgh Journal of Botany 64 (2), p. 213–223. DOI: 10.1017/S0960428607000911.
- STEFANOVIĆ, SAŠA; AUSTIN, DANIEL F.; OLMSTEAD, RICHARD G. (2003):**  
**Classification of Convolvulaceae: A phylogenetic Approach.**  
In: Systematic Botany 28 (4), p. 791–806.
- STEFANOVIĆ, SAŠA; COSTEA, MIHAI (2008):**

**Reticulate Evolution in the parasitic Genus *Cuscuta* (Convolvulaceae): over and over again.**

In: Botany 86 (8), p. 791–808. DOI: 10.1139/B08-033.

**STEFANOVIĆ, SAŠA; KRUEGER, LORI; OLMSTEAD, RICHARD G. (2002):**

**Monophyly of the Convolvulaceae and Circumscription of their major Lineages based on DNA Sequences of multiple Chloroplast Loci.**

In: American Journal of Botany 89 (9), p. 1510–1522.

**STEFANOVIĆ, SAŠA; KUZMINA, MARIA (2007):**

**Delimitation of Major Lineages within *Cuscuta* Subgenus *Grammica* (Convolvulaceae) using Plastid and Nuclear DNA Sequences.**

In: American Journal of Botany 94 (4), p. 568–589.

**STEFANOVIĆ, SAŠA; OLMSTEAD, RICHARD G. (2004):**

**Testing the phylogenetic Position of a parasitic Plant (*Cuscuta*, Convolvulaceae, Asteridae): Bayesian Inference and the parametric Bootstrap on Data drawn from three Genomes.**

In: Systematic Biology 53 (3), p. 384–399. DOI: 10.1080/10635150490445896.

**TRAIPEM, PAWEENA; STAPLES, GEORGE W. (2013):**

**A new Combination in *Argyreia* Lour. (Convolvulaceae).**

In: Adansonia 35 (2), p. 359–363. DOI: 10.5252/a2013n2a7.

**WILKIN, PAUL (1999):**

**A morphological cladistic Analysis of the Ipomoeae (Convolvulaceae).**

In: Kew Bulletin 54 (4), p. 853–876.

**WOOD, JOHN R. I.; CARINE, MARK A.; HARRIS, DAVID J.; WILKIN, PAUL; WILLIAMS, B.; SCOTLAND, ROBERT W. (2015):**  
***Ipomoea* (Convolvulaceae) in Bolivia.**

In: Kew Bulletin 70 (3), p. 30–124. DOI: 10.1007/S12225-015-9592-7.

## **Cordiaceae**

**GOTTSCHLING, MARC; MILLER, JAMES P. (2006):**

**Clarification of the taxonomic Position of *Auxemma*, *Patagonula*, and *Saccellium* (Cordiaceae, Boraginales).**

In: Systematic Botany 31 (2), p. 361–367.

## **Coriariaceae**

**YOKOYAMA, JUN U.N.; SUZUKI, M.; IWATSUKI, KUNIO; HASEBE, M. (2000):**

**Molecular Phylogeny of *Coriaria*, with special Emphasis on the disjunct Distribution.**

In: Molecular Phylogenetics and Evolution 14 (1), p. 11–19. DOI: 10.1006/mpev.1999.0672.

## **Cornaceae**

**FAN, CHUANZHU; PURUGGANAN, MICHAEL D.; THOMAS, DAVID T.; WIEGMANN, BRIAN M.; XIANG, JENNY QIU-YUN (2004):**

**Heterogeneous Evolution of the Myc-like Anthocyanin regulatory Gene and its phylogenetic utility in *Cornus* L. (Cornaceae).**

In: Molecular Phylogenetics and Evolution 33 (3), p. 580–594. DOI: 10.1016/j.ympev.2004.08.002.

**FAN, CHUANZHU; XIANG, JENNY QIU-YUN (2001):**

**Phylogenetic Relationships within *Cornus* (Cornaceae) based on 26s rDNA Sequences.**

In: American Journal of Botany 88 (6), p. 1131–1138. DOI: 10.2307/2657096.

**THOMAS, QIU-YUN XIANG DAVID T. (2008):**

**Tracking Character Evolution and biogeographic History through time in Cornaceae - Does choice of methods matter?**

In: Journal of Systematics and Evolution 46 (3), p. 349–374.

**XIANG, QIU-YUN; THOMAS, DAVID T.; ZHANG, WENHENG; MANCHESTER, STEVEN R.; MURRELL, ZACK (2006):**

**Species Level Phylogeny of the Genus *Cornus* (Cornaceae) based on molecular and morphological Evidence-Implications for Taxonomy and Tertiary Intercontinental Migration.**

In: Taxon 55 (1), p. 9–30. DOI: 10.2307/25065525.

**ZHANG, WENHENG; XIANG, QIU-YUN JENNY; THOMAS, DAVID T.; WIEGMANN, BRIAN M.; FROHLICH, MICHAEL W.; SOLTIS, DOUGLAS E. (2008):**

**Molecular Evolution of Pistillata-like Genes in the dogwood Genus *Cornus* (Cornaceae).**

In: Molecular Phylogenetics and Evolution 47 (1), p. 175–195. DOI: 10.1016/j.ympev.2007.12.022.

## **Cornales**

**LI, JIAN-HUA; ZHANG, ZHI-HONG (2010):**

**Sequences of 72 Plastid Genes support the early Divergence of Cornales in the Asterids.**

In: Journal of Systematics and Evolution 48 (6), p. 426–434. DOI: 10.1111/j.1759-6831.2010.00098.x.

**XIANG, QIU-YUN JENNY; THOMAS, DAVID T.; XIANG, QIAO PING (2011):**

**Resolving and dating the Phylogeny of Cornales - Effects of Taxon Sampling, Data partitions, and fossil Calibrations.**

In: Molecular Phylogenetics and Evolution 59 (1), p. 123–138. DOI: 10.1016/j.ympev.2011.01.016.

## **Corynocarpaceae**

**WAGSTAFF, STEVEN J.; DAWSON, MURRAY I. (2000):**

**Classification, Origin and Patterns of Diversification of *Corynocarpus* (Corynocarpaceae) inferred from DNA Sequences.**

In: Systematic Botany 25 (1), p. 134–149.

## **Costaceae**

**ANDRE, THIAGO JOSE DE CARVALHO; SPECHT, CHELSEA D.; SALZMAN, SHAYLA; PALMA-SILVA, CLARISSE; WENDT, TANIA (2015):**

**Evolution of Species Diversity in the Genus *Chamaecostus* (Costaceae): molecular Phylogenetics and morphometric approaches.**

In: Phytotaxa 204 (4), p. 265. DOI: 10.11646/phytotaxa.204.4.3.

**GOVAERTS, RAFAEL (2013):**

***Hellenia* Retz., the correct name for *Cheilocostus* C.D.Specht (Costaceae).**

In: Phytotaxa 151 (1), p. 63. DOI: 10.11646/phytotaxa.151.1.7.

**SPECHT, CHELSEA D.; STEVENSON, DENNIS WM. (2006):**

**A new Phylogeny-based Generic Classification of Costaceae (Zingiberales).**

In: Taxon 55 (1), p. 153. DOI: 10.2307/25065537.

## **Crassulaceae**

**ACEVEDO-ROSAS, RAÚL; CAMERON, KENNETH M.; SOSA, VICTORIA; PELL, SUSAN K. (2004):**

**A molecular phylogenetic Study of *Graptopetalum* (Crassulaceae) based on ETS, ITS, Rpl16, and Trnl-f Nucleotide Sequences.**

In: American Journal of Botany 91 (7), p. 1099–1104.

- ACEVEDO-ROSAS, RAÚL; SOSA, VICTORIA; LOREA, FRANCISCO G. (2004):  
**Phylogenetic Relationships and morphological Patterns in *Graptopetalum* (Crassulaceae).**  
In: *Brittonia* 56 (2), p. 185–194.
- CARRILLO-REYES, PABLO; SOSA, VICTORIA; MORT, MARK E. (2008):  
***Thompsonella* and the "*Echeveria* Group" (Crassulaceae): phylogenetic Relationships based on molecular and morphological characters.**  
In: *Taxon* 57 (3), p. 863–874.
- CARRILLO-REYES, PABLO; SOSA, VICTORIA; MORT, MARK E. (2009):  
**Molecular Phylogeny of the Acre Clade (Crassulaceae): dealing with the lack of definitions for *Echeveria* and *Sedum*.**  
In: *Molecular Phylogenetics and Evolution* 53 (1), p. 267–276. DOI: 10.1016/j.ympev.2009.05.022.
- FAIRFIELD, K. N.; MORT, MARK E.; SANTOS-GUERRA, ARNOLDO (2004):  
**Phylogenetics and Evolution of the Macaronesian Members of the Genus *Aichryson* (Crassulaceae) inferred from nuclear and Chloroplast Sequence Data.**  
In: *Plant Systematics and Evolution* 248 (1-4), p. 71–83. DOI: 10.1007/s00606-004-0190-7.
- GONTCHAROVA, SVETLANA B.; GONTCHAROV, ANDREY A. (2009):  
**Molecular Phylogeny and Systematics of flowering Plants of the Family Crassulaceae DC.**  
In: *Molecular Biology* 43 (5), p. 794–803. DOI: 10.1134/S0026893309050112.
- KLEIN, JOHANNES T.; KADEREIT, JOACHIM W. (2015):  
**Phylogeny, Biogeography, and Evolution of edaphic Association in the European Oreophytes *Sempervivum* and *Jovibarba* (Crassulaceae).**  
In: *International Journal of Plant Sciences* 176 (1), p. 44–71. DOI: 10.1086/677948.
- KOZYRENKO, MARINA M.; GONTCHAROVA, SVETLANA B.; GONTCHAROV, ANDREY A. (2013):  
**Phylogenetic Relationships among *Orostachys* subsection *Orostachys* Species (Crassulaceae) based on nuclear and Chloroplast DNA Data.**  
In: *Journal of Systematics and Evolution* 51 (5), p. 578–589. DOI: 10.1111/jse.12016.
- MORT, MARK E.; LEVSEN, NICHOLAS D.; RANDLE, CHRISTOPHER P.; VAN JAARSVELD, ERNST; PALMER, ANNIE (2005):  
**Phylogenetics and Diversification of *Cotyledon* (Crassulaceae) inferred from Nuclear and Chloroplast DNA Sequence Data.**  
In: *American Journal of Botany* 92 (7), p. 1170–1176.
- MORT, MARK E.; SOLTIS, DOUGLAS E.; SOLTIS, PAMELA S.; FRANCISCO-ORTEGA, JAVIER; SANTOS-GUERRA, ARNOLDO (2001):  
**Phylogenetic Relationships and Evolution of Crassulaceae inferred from matK Sequence Data.**  
In: *American Journal of Botany* 88 (1), p. 76–91.
- MORT, MARK E.; SOLTIS, DOUGLAS E.; SOLTIS, PAMELA S.; SANTOS-GUERRA, ARNOLDO; FRANCISCO-ORTEGA, JAVIER (2007):  
**Physiological Evolution and Association between Physiology and Growth Form in *Aeonium* (Crassulaceae).**  
In: *Taxon* 56 (2), p. 453–464.
- MORT, MARK EUGENE; RANDLE, CHRISTOPHER P.; BURGOYNE, PRISCILLA M.; SMITH, GIDEON F.; JAARSVELD, ERNST VAN; HOPPER, STEPHEN D. (2009):  
**Analyses of cpDNA matK Sequence Data place *Tillaea* (Crassulaceae) within *Crassula*.**

In: *Plant Systematics and Evolution* 283 (3-4), p. 211–217. DOI: 10.1007/s00606-009-0227-z.

**NIKULIN, ARTHUR YU.; NIKULIN, VYACHESLAV YU.; GONCTHAROVA, SVETLANA B.; GONTCHAROV, ANDREY A. (2015): ITS rDNA Sequence comparisons resolve phylogenetic Relationships in *Orostachys* subsection *Appendiculatae* (Crassulaceae).**

In: *Plant Systematics and Evolution* 301 (5), p. 1441–1453. DOI: 10.1007/s00606-014-1165-y.

**NIKULIN, VYACHESLAV YU.; GONTCHAROVA, SVETLANA B.; STEPHENSON, RAY; GONTCHAROV, ANDREY A. (2016): Phylogenetic Relationships between *Sedum* L. and related Genera (Crassulaceae) based on ITS rDNA Sequence comparisons.**

In: *Flora - Morphology, Distribution, Functional Ecology of Plants* 224, p. 218–229. DOI: 10.1016/j.flora.2016.08.003.

**ZHANG, JIAN-QIANG; MENG, SHI-YONG; ALLEN, GERALDINE A.; WEN, JUN; RAO, GUANG-YUAN (2014): Rapid Radiation and Dispersal out of the Qinghai-Tibetan Plateau of an alpine plant Lineage *Rhodiola* (Crassulaceae).**

In: *Molecular Phylogenetics and Evolution* 77, p. 147–158. DOI: 10.1016/j.ympev.2014.04.013.

## Crypteroniaceae

**CONTI, ELENA; ERIKSSON, TORSTEN; SCHÖNENBERGER, JÜRGEN; SYTSMA, KENNETH J.; BAUM, DAVID A. (2002): Early Tertiary Out-of-India Dispersal of Crypteroniaceae: Evidence from Phylogeny and molecular Dating.**

In: *Evolution* 56 (10), p. 1931–1942. DOI: 10.1554/0014-3820(2002)056[1931:ETOOID]2.0.CO;2.

**RUTSCHMANN, FRANK; ERIKSSON, TORSTEN; SCHÖNENBERGER, JÜRGEN; CONTI, ELENA (2004): Did Crypteroniaceae really Disperse out of India? molecular Dating Evidence from *rbcl*, *ndhF*, and *rpl16* Intron Sequences.**

In: *International Journal of Plant Sciences* 165 (4S), S69-S83.

## Cucurbitaceae

**BOER, HUGO J.; CROSS, HUGH B.; WILDE, WILLEM J.J.O.; DUYPJES-DE WILDE, BRIGITTA E.E.; GRAVENDEEL, BARBARA (2015):**

**Molecular phylogenetic Analyses of Cucurbitaceae Tribe Benincaseae urge for Merging of *Pilogyne* with *Zehneria*.**

In: *Phytotaxa* 236 (2), p. 173. DOI: 10.11646/phytotaxa.236.2.6.

**BOER, HUGO J.; SCHAEFER, HANNO; THULIN, MATS; RENNER, SUSANNE P. (2012): Evolution and loss of long-fringed petals: a case Study using a dated Phylogeny of the snake gourds, *Trichosanthes* (Cucurbitaceae).**

In: *BMC Evolutionary Biology* 12, p. 108. DOI: 10.1186/1471-2148-12-108.

**CHOMICKI, GUILLAUME; RENNER, SUSANNE P. (2015): Watermelon Origin solved with molecular Phylogenetics including Linnaean Material: another Example of Museomics.**

In: *the new Phytologist* 205 (2), p. 526–532. DOI: 10.1111/nph.13163.

**DUCHEN, PABLO; RENNER, SUSANNE P. (2010): The Evolution of *Cayaponia* (Cucurbitaceae): Repeated shifts from Bat to Bee Pollination and long-distance Dispersal to Africa 2-5 million years ago.**

In: *American Journal of Botany* 97 (7), p. 1129–1141. DOI: 10.3732/ajb.0900385.

**GHEBRETINSAE, AMANUEL G.; THULIN, MATS; BARBER, JANET C. (2007): Relationships of Cucumbers and Melons unraveled: molecular Phylogenetics of *Cucumis* and related Genera (Benincaseae, Cucurbitaceae).**

In: American Journal of Botany 94 (7), p. 1256–1266. DOI: 10.3732/ajb.94.7.1256.

**HOLSTEIN, NORBERT; RENNER, SUSANNE P. (2011):**

**A dated Phylogeny and collection records reveal repeated Biome Shifts in the African Genus *Coccinia* (Cucurbitaceae).**

In: BMC Evolutionary Biology 11, p. 28. DOI: 10.1186/1471-2148-11-28.

**KATES, HEATHER R.; SOLTIS, PAMELA S.; SOLTIS, DOUGLAS E. (2017):**

**Evolutionary and domestication History of *Cucurbita* (pumpkin and squash) Species inferred from 44 nuclear loci.**

In: Molecular Phylogenetics and Evolution 111, p. 98–109. DOI: 10.1016/j.ympev.2017.03.002.

**KOCYAN, ALEXANDER; ZHANG, LI-BING; SCHAEFER, HANNO; RENNER, SUSANNE P. (2007):**

**A multi-locus Chloroplast Phylogeny for the Cucurbitaceae and its Implications for Character Evolution and Classification.**

In: Molecular Phylogenetics and Evolution 44 (2), p. 553–577. DOI: 10.1016/j.ympev.2006.12.022.

**LI, HONG-TAO; LI, DE-ZHU (2008):**

**Systematic Position of *Gomphogyne* (Cucurbitaceae) inferred from ITS, rpl16 and trnS-trnR DNA Sequences.**

In: Journal of Systematics and Evolution 46 (4), p. 595–599.

**LI, HONG-TAO; YANG, JUN-BO; LI, DE-ZHU; MÖLLER, MICHAEL; SHAH, AMIN (2010):**

**A molecular phylogenetic Study of *Hemsleya* (Cucurbitaceae) based on ITS, rpl16, trnH-psbA, and trnL DNA Sequences.**

In: Plant Systematics and Evolution 285 (1-2), p. 23–32. DOI: 10.1007/s00606-009-0252-y.

**LIRA, RAFAEL; SOSA, VICTORIA; LEGASPI, TALITHA; DÁVILA, PATRICIA (2015):**

**Phylogenetic Relationships of *Ibervillea* and *Tumamoca* (Coniandreae, Cucurbitaceae), two Genera of the Dry Lands of North America.**

In: Phytotaxa 201 (3), p. 197. DOI: 10.11646/phytotaxa.201.3.3.

**NEE, MICHAEL; SCHAEFER, HANNO; RENNER, SUSANNE P. (2009):**

**The Relationship between *Anisosperma* and *Fevillea* (Cucurbitaceae), and a new Species of *Fevillea* from Bolivia.**

In: Systematic Botany 34 (4), p. 704–708. DOI: 10.1600/036364409790139718.

**RENNER, SUSANNE S.; SCHAEFER, HANNO; KOCYAN, ALEXANDER (2007):**

**Phylogenetics of *Cucumis* (Cucurbitaceae): *Cucumber* (*C. sativus*) belongs in an Asian/Australian Clade far from Melon (*C. melo*).**

In: BMC Evolutionary Biology 7, p. 58. DOI: 10.1186/1471-2148-7-58.

**SCHAEFER, HANNO; KOCYAN, ALEXANDER; RENNER, SUSANNE P. (2008):**

***Linnaeosicyos* (Cucurbitaceae): a new Genus for *Trichosanthes amara*, the Caribbean Sister Species of all *Sicyeae*.**

In: Systematic Botany 33 (2), p. 349–355. DOI: 10.1600/036364408784571707.

**SCHAEFER, HANNO; RENNER, SUSANNE P. (2010):**

**A three-Genome Phylogeny of *Momordica* (Cucurbitaceae) suggests seven returns from Dioecy to Monoecy and recent long-distance Dispersal to Asia.**

In: Molecular Phylogenetics and Evolution 54 (2), p. 553–560. DOI: 10.1016/j.ympev.2009.08.006.

**SINGH, N. P.; MATTA, N. K. (2008):**

**Variation studies on Seed storage proteins and Phylogenetics of the Genus *Cucumis*.**

In: Plant Systematics and Evolution 275 (3-4), p. 209–218. DOI: 10.1007/s00606-008-0063-6.



- STEELE, P. ROXANNE; FRIAR, LAUREN M.; GILBERT, LAWRENCE E.; JANSEN, ROBERT K. (2010):  
**Molecular Systematics of the Neotropical Genus *Psiguria* (Cucurbitaceae):  
 Implications for Phylogeny and Species Identification.**  
 In: American Journal of Botany 97 (1), p. 156–173. DOI: 10.3732/ajb.0900192.
- TELFORD, IAN R.H.; SEBASTIAN, PATRIZIA; LANGE, PETER J.; BRUHL, JEREMY J.; RENNER, SUSANNE P. (2012):  
**Morphological and molecular Data reveal three rather than one Species of *Sicyos*  
 (Cucurbitaceae) in Australia, New Zealand and Islands of the South West Pacific.**  
 In: Australian Systematic Botany 25 (3), p. 188–201. DOI: 10.1071/SB11032.
- VOLZ, STEFANIE M.; RENNER, SUSANNE P. (2008):  
**Hybridization, polyploidy, and evolutionary transitions between Monoecy and  
 Dioecy in *Bryonia* (Cucurbitaceae).**  
 In: American Journal of Botany 95 (10), p. 1297–1306. DOI: 10.3732/ajb.0800187.
- VOLZ, STEFANIE M.; RENNER, SUSANNE P. (2009):  
**Phylogeography of the ancient Eurasian medicinal plant Genus *Bryonia*  
 (Cucurbitaceae) inferred from nuclear and Chloroplast Sequences.**  
 In: Taxon 58 (2), p. 550–560.

## Cucurbitales

- SCHAEFER, HANNO; RENNER, SUSANNE P. (2011):  
**Phylogenetic Relationships in the Order Cucurbitales and a new Classification of the  
 gourd Family (Cucurbitaceae).**  
 In: Taxon 60 (1), p. 122–138.
- ZHANG, LI-BING; SIMMONS, MARK P.; KOCYAN, ALEXANDER; RENNER, SUSANNE P. (2006):  
**Phylogeny of the Cucurbitales based on DNA Sequences of nine Loci from three  
 Genomes: Implications for morphological and sexual System Evolution.**  
 In: Molecular Phylogenetics and Evolution 39 (2), p. 305–322. DOI: 10.1016/j.ympev.2005.10.002.

## Cunoniaceae

- BRADFORD, JASON C. (2002):  
**Molecular Phylogenetics and morphological Evolution in Cunoniaceae (Cunoniaceae).**  
 In: Annals of the Missouri Botanical Garden 89 (4), p. 491–503.
- BRADFORD, JASON C.; BARNES, RICHARD W. (2001):  
**Phylogenetics and Classification of Cunoniaceae (Oxalidales) using Chloroplast DNA  
 Sequences and Morphology.**  
 In: Systematic Botany 26 (2), p. 354–385.
- HOPKINS, HELEN C.F.; ROZEFELDS, ANDREW C.; PILLON, YOHAN (2013):  
***Karrabina* gen. nov. (Cunoniaceae), for the Australian Species previously placed in  
*Geissois*, and a Synopsis of Genera in the Tribe Geissoieae.**  
 In: Australian Systematic Botany 26 (3), p. 167–185. DOI: 10.1071/SB12037.
- PILLON, YOHAN; HOPKINS, HELEN C.F.; MUNZINGER, JÉRÔME; CHASE, MARK W. (2009):  
**A molecular and morphological Survey of Generic Limits of *Acsmithia* and  
*Spiraeanthemum* (Cunoniaceae).**  
 In: Systematic Botany 34 (1), p. 141–148. DOI: 10.1600/036364409787602410.
- ROZEFELDS, ANDREW C.; BARNES, RICHARD W. (2002):  
**The Systematic and Biogeographical Relationships of *Ceratopetalum* (Cunoniaceae)  
 in Australia and New Guinea.**

## Cupressaceae

ADAMS, ROBERT P.; SCHWARZBACH, ANDREA E. (2013):

**Phylogeny of *Juniperus* using nrDNA and four cpDNA Regions.**

In: Phytologia 95 (2), p. 179–187.

GADEK, PAUL A.; ALPERS, DERYN L.; HESLEWOOD, MARGARET M.; QUINN, CHRISTOPHER J. (2000):

**Relationships within Cupressaceae sensu lato: A combined morphological and molecular Approach.**

In: American Journal of Botany 87 (7), p. 1044–1057.

KUSUMI, JUNKO; TSUMURA, YOSHIHIKO; YOSHIMARU, HIROSHI; TACHIDA, HIDENORI (2000):

**Phylogenetic Relationships in Taxodiaceae and Cupressaceae based on matK Gene, Chl Gene, Trnl-trnf lgs Region, and Trnl Intron Sequences.**

In: American Journal of Botany 87 (10), p. 1480–1488.

LITTLE, DAMON P. (2006):

**Evolution and Circumscription of the True Cypresses (Cupressaceae: *Cupressus*).**

In: Systematic Botany 31 (3), p. 461–480.

LITTLE, DAMON P.; SCHWARZBACH, ANDREA E.; ADAMS, ROBERT P.; HSIEH, CHANG-FU (2004):

**The Circumscription and phylogenetic Relationships of *Callitropsis* and the newly described Genus *Xanthocyparis* (Cupressaceae).**

In: American Journal of Botany 91 (11), p. 1872–1881.

MAO, KANG-SHAN; HAO, GANG; LIU, JIAN-QUAN; ADAMS, ROBERT P.; MILNE, RICHARD IAN (2010):

**Diversification and Biogeography of *Juniperus* (Cupressaceae): variable Diversification rates and multiple intercontinental Dispersals.**

In: the new Phytologist 188 (1), p. 254–272. DOI: 10.1111/j.1469-8137.2010.03351.x.

PENG, DAN; WANG, XIAO-QUAN (2008):

**Reticulate Evolution in *Thuja* inferred from multiple Gene Sequences: Implications for the Study of biogeographical disjunction between eastern Asia and North America.**

In: Molecular Phylogenetics and Evolution 47 (3), p. 1190–1202. DOI: 10.1016/j.ympev.2008.02.001.

PIGGIN, JOSEPHINE; BRUHL, JEREMY J. (2010):

**Phylogeny Reconstruction of *Callitris* Vent. (Cupressaceae) and its Allies leads to Inclusion of *Actinostrobus* within *Callitris*.**

In: Australian Systematic Botany 23 (2), p. 69–93. DOI: 10.1071/SB09044.

PYE, M. G.; GADEK, PAUL A.; EDWARDS, K. J. (2003):

**Divergence, Diversity and Species of the Australasian *Callitris* (Cupressaceae) and allied Genera: Evidence from ITS Sequence Data.**

In: Australian Systematic Botany 16 (4), p. 505–514. DOI: 10.1071/SB02019.

SCHULZ, CHRISTIAN; STÜTZEL, THOMAS (2007):

**Evolution of taxodiaceous Cupressaceae (Coniferopsida).**

In: Organisms Diversity and Evolution 7 (2), p. 124–135. DOI: 10.1016/j.ode.2006.03.001.

TERRY, RANDALL G.; BARTEL, JIM A.; ADAMS, ROBERT P. (2012):

**Phylogenetic Relationships among the New World Cypresses (*Hesperocyparis*; Cupressaceae): Evidence from noncoding Chloroplast DNA Sequences.**

In: Plant Systematics and Evolution 298 (10), p. 1987–2000. DOI: 10.1007/s00606-012-0696-3.

TERRY, RANDALL G.; PYNE, MATTHEW I.; BARTEL, JIM A.; ADAMS, ROBERT P. (2016):

**A molecular Biogeography of the New World Cupresses (*Callitropsis*, *Hesperocyparis*; Cupressaceae).**

In: Plant Systematics and Evolution 302 (7), p. 921–942. DOI: 10.1007/s00606-016-1308-4.

XU, TINGTING; ABBOTT, RICHARD J.; MILNE, RICHARD IAN; MAO, KANG-SHAN; DU, FANG K.; WU, GUILI ET AL. (2010):  
**Phylogeography and allopatric Divergence of Cypress Species (*Cupressus* L.) in the Qinghai-Tibetan Plateau and adjacent Regions.**

In: BMC Evolutionary Biology 10, p. 194. DOI: 10.1186/1471-2148-10-194.

YANG, ZU-YU; RAN, JIN-HUA; WANG, XIAO-QUAN (2012):

**Three Genome-based Phylogeny of Cupressaceae s.l.: further Evidence for the Evolution of Gymnosperms and Southern Hemisphere Biogeography.**

In: Molecular Phylogenetics and Evolution 64 (3), p. 452–470. DOI: 10.1016/j.ympev.2012.05.004.

## Cyatheaceae

BYSTRIAKOVA, NADIA; FLS, HARALD SCHNEIDER; COOMES, DAVID (2011):

**Evolution of the climatic Niche in scaly Tree Ferns (Cyatheaceae, Polypodiopsida).**

In: Botanical Journal of the Linnean Society 165, p. 1–19.

KORALL, PETRA; CONANT, DAVID S.; METZGAR, JORDAN S.; SCHNEIDER, HARALD; PRYER, KATHLEEN M. (2007):

**A molecular Phylogeny of Scaly Tree Ferns (Cyatheaceae).**

In: American Journal of Botany 94 (5), p. 873–886.

KORALL, PETRA; PRYER, KATHLEEN M.; METZGAR, JORDAN S.; SCHNEIDER, HARALD; CONANT, DAVID P. (2006):

**Tree Ferns: monophyletic Groups and their Relationships as revealed by four Protein-coding Plastid Loci.**

In: Molecular Phylogenetics and Evolution 39 (3), p. 830–845. DOI: 10.1016/j.ympev.2006.01.001.

LEHNERT, MARCUS (2016):

**A Synopsis of the exindusiate Species of *Cyathea* (Cyatheaceae-Polypodiopsida) with bipinnate-pinnatifid or more complex Fronds, with a Revision of the *C. lasiosora*-complex.**

In: Phytotaxa 243 (1), p. 1. DOI: 10.11646/phytotaxa.243.1.1.

## Cycadaceae

BROOKES, D. R.; HERWARD, J. P.; TERRY, L. I.; WALTER, G. H. (2015):

**Evolutionary dynamics of a cycad obligate Pollination Mutualism - Pattern and Process in extant *Macrozamia* Cycads and their specialist Thrips Pollinators.**

In: Molecular Phylogenetics and Evolution 93, p. 83–93. DOI: 10.1016/j.ympev.2015.07.003.

CHAW, SHU-MIAW; WALTERS, TERRENCE W.; CHANG, CHIEN-CHANG; HU, SHU-HSUAN; CHEN, SHIN-HSIAO (2005):

**A Phylogeny of Cycads (Cycadales) inferred from Chloroplast matK gene, trnK Intron, and nuclear rDNA ITS Region.**

In: Molecular Phylogenetics and Evolution 37 (1), p. 214–234. DOI: 10.1016/j.ympev.2005.01.006.

CONDAMINE, FABIEN L.; NAGALINGUM, NATHALIE S.; MARSHALL, CHARLES R.; MORLON, HÉLÈNE (2015):

**Origin and Diversification of living Cycads: a cautionary Tale on the Impact of the branching Process prior in Bayesian molecular Dating.**

In: BMC Evolutionary Biology 15, p. 65. DOI: 10.1186/s12862-015-0347-8.

LINDSTROM, ANDERS J.; HILL, K. D. (2007):

**The Genus *Cycas* (Cycadaceae) in India.**

In: Telopea 11 (4), p. 463–488.

LIU, JIAN; ZHANG, SHOU-ZHOU; NAGALINGUM, NATHALIE S.; CHIANG, YU-CHUNG; LINDSTROM, ANDERS J.; GONG, XUN (2018):

**Phylogeny of the Gymnosperm Genus *Cycas* L. (Cycadaceae) as inferred from Plastid and nuclear Loci based on a large-scale Sampling: evolutionary Relationships and taxonomical Implications.**

In: *Molecular Phylogenetics and Evolution* 127, p. 87–97. DOI: 10.1016/j.ympev.2018.05.019.

NICOLALDE-MOREJÓN, FERNANDO; VERGARA-SILVA, FRANCISCO; GONZÁLEZ-ASTORGA, JORGE; STEVENSON, DENNIS WM.; VOVIDES, ANDREW P.; SOSA, VICTORIA (2011):

**A character-based approach in the Mexican cycads supports diverse Multigene Combinations for DNA barcoding.**

In: *Cladistics* 27 (2), p. 150–164. DOI: 10.1111/j.1096-0031.2010.00321.x.

RAI, HARDEEP S.; O'BRIEN, HEATH E.; REEVES, PATRICK A.; OLMSTEAD, RICHARD G.; GRAHAM, SEAN W. (2003):

**Inference of higher-order Relationships in the Cycads from a large Chloroplast Data Set.**

In: *Molecular Phylogenetics and Evolution* 29 (2), p. 350–359. DOI: 10.1016/S1055-7903(03)00131-3.

SALAS-LEIVA, DAYANA E.; MEEROW, ALAN W.; CALONJE, MICHAEL; GRIFFITH, M. PATRICK; FRANCISCO-ORTEGA, JAVIER; NAKAMURA, KYOKO ET AL. (2013):

**Phylogeny of the Cycads based on multiple single-copy nuclear Genes: Congruence of concatenated Parsimony, Likelihood and Species Tree Inference Methods.**

In: *Annals of Botany* 112 (7), p. 1263–1278. DOI: 10.1093/aob/mct192.

TREUTLEIN, JENS; WINK, MICHAEL (2002):

**Molecular Phylogeny of Cycads inferred from *rbcl* Sequences.**

In: *Naturwissenschaften* 89 (5), p. 221–225. DOI: 10.1007/s00114-002-0308-0.

WEI, ZHOU; MENG-MENG, GUAN; XUN, GONG (2015):

***Cycas chenii* (Cycadaceae), a new Species from China, and its phylogenetic Position.**

In: *Journal of Systematics and Evolution* 53 (6), p. 489–498. DOI: 10.1111/jse.12153.

XIAO, LONG-QIAN; MÖLLER, MICHAEL (2015):

**Nuclear ribosomal ITS functional Paralogs resolve the phylogenetic Relationships of a late-Miocene Radiation Cycad *Cycas* (Cycadaceae).**

In: *Public Library of Science One* 10 (1), e0117971. DOI: 10.1371/journal.pone.0117971.

XIAO, LONG-QIAN; MÖLLER, MICHAEL; ZHU, HUA (2010):

**High nrDNA ITS Polymorphism in the ancient extant Seed Plant *Cycas*: incomplete concerted Evolution and the Origin of Pseudogenes.**

In: *Molecular Phylogenetics and Evolution* 55 (1), p. 168–177. DOI: 10.1016/j.ympev.2009.11.020.

## Cymodoceaceae

PETERSEN, GITTE; SEBERG, OLE; SHORT, FREDERICK T.; FORTES, MIGUEL D. (2014):

**Complete genomic congruence but Non-Monophyly of *Cymodocea* (Cymodoceaceae), a small Group of Seagrasses.**

In: *Taxon* 63 (1), p. 3–8. DOI: 10.12705/631.2.

## Cynomoriaceae

ZHANG, ZHI-HONG; LI, CHUN-QI; LI, JIAN-HUA (2009):

**Phylogenetic Placement of *Cynomorium* in Rosales inferred from Sequences of the inverted repeat Region of the Chloroplast Genome.**

In: *Journal of Systematics and Evolution* 47 (4), p. 297–304. DOI: 10.1111/j.1759-6831.2009.00035.x.

## Cyperaceae

BARRETT, RUSSELL L.; WILSON, KAREN L. (2012):

**A Review of the Genus *Lepidosperma* Labill. (Cyperaceae: Schoeneae).**

In: Australian Systematic Botany 25 (4), p. 225–294. DOI: 10.1071/SB11037.

BAUTERS, KENNETH; ASSELMAN, PIETER; SIMPSON, DAVID A.A.; MUASYA, A. MUTHAMA; GOETGHEBEUR, PAUL; LARRIDON, ISABEL (2016):

**Phylogenetics, ancestral state reconstruction, and a new infrageneric Classification of *Scleria* (Cyperaceae) based on three DNA Markers.**

In: Taxon 65 (3), p. 444–466. DOI: 10.12705/653.2.

BAUTERS, KENNETH; LARRIDON, ISABEL; REYNDERS, MARC; ASSELMAN, PIETER; VRIJDAGHS, ALEXANDER; MUASYA, A. MUTHAMA ET AL. (2014):

**A new Classification for *Lipocarpa* and *Volkiella* as infrageneric Taxa of *Cyperus* s.l. (Cypereae, Cyperoideae, Cyperaceae): Insights from Species Tree Reconstruction supplemented with morphological and Floral developmental Data.**

In: Phytotaxa 166 (1), p. 1. DOI: 10.11646/phytotaxa.166.1.1.

CASTRO, OLGA; GARGIULO, ROBERTA; DEL GUACCHIO, EMANUELE; CAPUTO, PAOLO; LUCA, PAOLO (2015):

**A molecular survey concerning the Origin of *Cyperus esculentus* (Cyperaceae, Poales): two Sides of the same Coin (Weed vs. Crop).**

In: Annals of Botany 115 (5), p. 733–745. DOI: 10.1093/aob/mcv001.

CHACÓN, JULIANA; MADRIÑÁN, SANTIAGO; CHASE, MARK W.; BRUHL, JEREMY J. (2006):

**Molecular Phylogenetics of *Oreobolus* (Cyperaceae) and the Origin and Diversification of the American Species.**

In: Taxon 55 (2), p. 359–366. DOI: 10.2307/25065583.

DA SILVA, CARLOS ROBERTO MAXIMIANO; DA SILVA, LEANDRO BENTO; ANDRADE, JESUS; TARDELLI, CÉLIA GUADALUPE; TREVISAN, RAFAEL; GONZÁLEZ-ELIZONDO, MARÍA SOCORRO; VANZELA, ANDRÉ LUÍS LAFORGA (2012):

**Ornamentation of Achene Silica Walls and its Contribution to the Systematics of *Eleocharis* (Cyperaceae).**

In: Plant Systematics and Evolution 298 (2), p. 391–398. DOI: 10.1007/s00606-011-0552-x.

DRAGON, JULIE A.; BARRINGTON, DAVID P. (2009):

**Systematics of the *Carex aquatilis* and *C. lenticularis* Lineages: Geographically and ecologically divergent sister Clades of *Carex* Section *Phacocystis* (Cyperaceae).**

In: American Journal of Botany 96 (10), p. 1896–1906. DOI: 10.3732/ajb.0800404.

ESCUDERO, MARCIAL; EATON, DEREN A. R.; HAHN, MARLENE; HIPPI, ANDREW L. (2014):

**Genotyping-by-Sequencing as a tool to infer Phylogeny and ancestral Hybridization: a case Study in *Carex* (Cyperaceae).**

In: Molecular Phylogenetics and Evolution 79, p. 359–367. DOI: 10.1016/j.ympev.2014.06.026.

ESCUDERO, MARCIAL; HIPPI, ANDREW L.; LUCEÑO, MODESTO (2010):

**Karyotype stability and predictors of Chromosome Number Variation in Sedges: a Study in *Carex* Section *Spirostachyae* (Cyperaceae).**

In: Molecular Phylogenetics and Evolution 57 (1), p. 353–363. DOI: 10.1016/j.ympev.2010.07.009.

ESCUDERO, MARCIAL; LUCEÑO, MODESTO (2009):

**Systematics and Evolution of *Carex* sects. *Spirostachyae* and *Elatae* (Cyperaceae).**

In: Plant Systematics and Evolution 279 (1-4), p. 163–189. DOI: 10.1007/s00606-009-0156-x.

ESCUDERO, MARCIAL; VALCÁRCEL, VIRGINIA; VARGAS, PABLO; LUCEÑO, MODESTO (2008):

- Evolution in *Carex* L. Sect. *Spirostachyae* (Cyperaceae): A molecular and cytogenetic Approach.**  
In: *Organisms Diversity and Evolution* 7 (4), p. 271–291. DOI: 10.1016/j.ode.2006.08.006.
- ESCUADERO, MARCIAL; VALCÁRCEL, VIRGINIA; VARGAS, PABLO; LUCEÑO, MODESTO (2009):  
Significance of ecological Vicariance and long-distance Dispersal in the  
Diversification of *Carex* Sect. *Spirostachyae* (Cyperaceae).**  
In: *American Journal of Botany* 96 (11), p. 2100–2114. DOI: 10.3732/ajb.0900134.
- FORD, BRUCE A.; IRANPOUR, MAHMOOD; NACZI, ROBERT F. C.; STARR, JULIAN R.; JEROME, CHERYL A. (2006):  
Phylogeny of *Carex* Subg. *Vignea* (Cyperaceae) based on Non-coding nrDNA  
Sequence Data.**  
In: *Systematic Botany* 31 (1), p. 70–82.
- GARCÍA-MADRID, ANA S.; MUASYA, A. MUTHAMA; ÁLVAREZ, INÉS; CANTÓ, PALOMA; MOLINA, JOSÉ ANTONIO (2015):  
Towards resolving phylogenetic Relationships in the *Ficinia* Clade and Description of  
the new Genus *Afroscirpoides* (Cyperaceae: Cyperaceae).**  
In: *Taxon* 64 (4), p. 688–702. DOI: 10.12705/644.2.
- GEBAUER, SEBASTIAN; STARR, JULIAN R.; HOFFMANN, MATTHIAS H. (2014):  
Parallel and convergent Diversification in two Northern Hemispheric species-rich  
*Carex* Lineages (Cyperaceae).**  
In: *Organisms Diversity and Evolution* 14 (3), p. 247–258. DOI: 10.1007/s13127-014-0171-9.
- GEHRKE, BERIT; MARTÍN-BRAVO, SANTIAGO; MUASYA, MUTHAMA; LUCEÑO, MODESTO (2010):  
Monophyly, phylogenetic Position and the role of Hybridization in *Schoenoxiphium*  
Nees (Cariceae, Cyperaceae).**  
In: *Molecular Phylogenetics and Evolution* 56 (1), p. 380–392. DOI: 10.1016/j.ympev.2010.03.036.
- GHAMKHAR, KIOUMARS; MARCHANT, ADAM D.; WILSON, KAREN L.; BRUHL, JEREMY J. (2007):  
Phylogeny of *Abildgaardieae* (Cyperaceae) inferred from ITS and trnL–F Data.**  
In: *Aliso* 23 (1), p. 149–164.
- HENDRICH, M.; MICHALSKI, S.; BEGEROW, D.; OBERWINKLER, F.; HELLWIG, FRANK H. (2004):  
Phylogenetic Relationships in *Carex*, Subgenus *Vignea* (Cyperaceae), based on ITS  
Sequences.**  
In: *Plant Systematics and Evolution* 246 (1-2), p. 109–125. DOI: 10.1007/s00606-004-0127-1.
- HENDRICH, M.; OBERWINKLER, F.; BEGEROW, D.; BAUER, R. (2004):  
*Carex*, Subgenus *Carex* (Cyperaceae) - A phylogenetic approach using ITS Sequences.**  
In: *Plant Systematics and Evolution* 246 (1-2), p. 89–107. DOI: 10.1007/s00606-004-0128-0.
- HINCHLIFF, CODY E.; LLIULLY, ARIEL ERNESTO LLIULLY A.; CAREY, TIMOTHY; ROALSON, ERIC H. (2010):  
The Origins of *Eleocharis* (Cyperaceae) and the Status of *Websteria*, *Egleria*, and  
*Chillania*.**  
In: *Taxon* 59 (3), p. 709–719.
- HINCHLIFF, CODY E.; ROALSON, ERIC H. (2013):  
Using Supermatrices for phylogenetic inquiry: an Example using the Sedges.**  
In: *Systematic Biology* 62 (2), p. 205–219. DOI: 10.1093/sysbio/sys088.
- HIPP, ANDREW L.; REZNICEK, ANTON A.; ROTHROCK, PAUL E.; WEBER, JAIME A. (2006):  
Phylogeny and Classification of *Carex* Section *Ovales* (Cyperaceae).**  
In: *International Journal of Plant Sciences* 167 (5), p. 1029–1048.
- HIPP, ANDREW L.; ROTHROCK, PAUL E.; REZNICEK, ANTON A.; BERRY, PAUL E. (2007):**

- Chromosome Number Changes Associated with Speciation in Sedges: a phylogenetic Study in *Carex* Section *Ovales* (Cyperaceae) using AFLP Data.**  
In: *Aliso* 23, p. 193–203.
- ITO, YU; VILJOEN, JAN-ADRIAAN; TANAKA, NORIO; YANO, OKIHITO; MUASYA, A. MUTHAMA (2016):  
**Phylogeny of *Isolepis* (Cyperaceae) revisited: non-monophyletic Nature of *I. fluitans* sensu lato and Resurrection of *I. lenticularis*.**  
In: *Plant Systematics and Evolution* 302 (2), p. 231–238. DOI: 10.1007/s00606-015-1253-7.
- JIMÉNEZ-MEJÍAS, PEDRO; HAHN, MARLENE; LUEDERS, KATE; STARR, JULIAN R.; BROWN, BETHANY H.; CHOUINARD, BRIANNA N. ET AL. (2016):  
**Megaphylogenetic Specimen-level Approaches to the *Carex* (Cyperaceae) Phylogeny using ITS, ETS, and matK Sequences: Implications for Classification.**  
In: *Systematic Botany* 41 (3), p. 500–518. DOI: 10.1600/036364416X692497.
- JUNG, JONGDUK; CHOI, HONG-KEUN (2013):  
**Recognition of two major Clades and early diverged Groups within the Subfamily Cyperoideae (Cyperaceae) including Korean Sedges.**  
In: *Journal of Plant Research* 126 (3), p. 335–349. DOI: 10.1007/s10265-012-0534-2.
- KIM, CHANGKYUN; JUNG, JONGDUK; CHOI, HONG-KEUN (2012):  
**Molecular Identification of *Schoenoplectiella* Species (Cyperaceae) by Use of Microsatellite Markers.**  
In: *Plant Systematics and Evolution* 298 (4), p. 811–817. DOI: 10.1007/s00606-012-0592-x.
- KING, MATTHEW G.; ROALSON, ERIC H. (2008):  
**Exploring evolutionary Dynamics of nrDNA in *Carex* Subgenus *Vignea* (Cyperaceae).**  
In: *Systematic Botany* 33 (3), p. 514–524. DOI: 10.1600/036364408785679860.
- KOSNAR, JAN; KOSNAR, JIRÍ; HERBSTOVÁ, MIROSLAVA; MACEK, PETR; REJMÁNKOVÁ, ELISKA; STECH, MILAN (2010):  
**Natural Hybridization in tropical Spikerushes of *Eleocharis* Subgenus *Limnochloa* (Cyperaceae): Evidence from Morphology and DNA Markers.**  
In: *American Journal of Botany* 97 (7), p. 1229–1240. DOI: 10.3732/ajb.1000029.
- LARRIDON, ISABEL; BAUTERS, KENNETH; REYNDERS, MARC; HUYGH, WIM; GOETGHEBEUR, PAUL (2014):  
**Taxonomic Changes in C4 *Cyperus* (Cypereae, Cyperoideae, Cyperaceae): combining the Sedge Genera *Ascolepis*, *Kyllinga* and *Pycurus* into *Cyperus* s.l.**  
In: *Phytotaxa* 166 (1), p. 33. DOI: 10.11646/phytotaxa.166.1.2.
- LARRIDON, ISABEL; BAUTERS, KENNETH; REYNDERS, MARC; HUYGH, WIM; MUASYA, A. MUTHAMA; SIMPSON, DAVID A.A.; GOETGHEBEUR, PAUL (2013):  
**Towards a new Classification of the giant paraphyletic Genus *Cyperus* (Cyperaceae): phylogenetic Relationships and generic Delimitation in C4-*Cyperus*.**  
In: *Botanical Journal of the Linnean Society* 172 (1), p. 106–126. DOI: 10.1111/boj.12020.
- LARRIDON, ISABEL; GOVAERTS, RAFAEL; BAUTERS, KENNETH; GOETGHEBEUR, PAUL (2016):  
***Cyperus albescens*, a new Combination in *Cyperus* (Cyperaceae) for the common (sub)tropical African and Asian Species *Lipocarpa chinensis*.**  
In: *Kew Bulletin* 71 (2). DOI: 10.1007/S12225-016-9642-9.
- LARRIDON, ISABEL; REYNDERS, MARC; HUYGH, WIM; BAUTERS, KENNETH; VAN DE PUTTE, KOBEKE; MUASYA, A. MUTHAMA ET AL. (2011):  
**Affinities in C3-*Cyperus* Lineages (Cyperaceae) revealed using molecular phylogenetic Data and Carbon Isotope Analysis.**  
In: *Botanical Journal of the Linnean Society* 167 (1), p. 19–46. DOI: 10.1111/j.1095-8339.2011.01160.x.

- LEHNEBACH, CARLOS A. (2011):  
**Re-evaluating Species limits in *Uncinia angustifolia*, *U. caespitosa* s.str., *U. rupestris*, *U. viridis* and *U. zotovii* (Cyperaceae).**  
In: Australian Systematic Botany 24 (6), p. 405–420. DOI: 10.1071/SB11014.
- LÉVEILLÉ-BOURRET, ÉTIENNE; DONADÍO, SABINA; GILMOUR, CLAIRE N.; STARR, JULIAN R. (2015):  
***Rhodoscirpus* (Cyperaceae: Scirpeae), a new South American Sedge Genus supported by molecular, morphological, anatomical and embryological Data.**  
In: Taxon 64 (5), p. 931–944. DOI: 10.12705/645.4.
- LÉVEILLÉ-BOURRET, ÉTIENNE; GILMOUR, CLAIRE N.; STARR, JULIAN R.; NACZI, ROBERT F. C.; SPALINK, DANIEL; SYTSMAN, KENNETH J. (2014):  
**Searching for the sister to Sedges (*Carex*): resolving Relationships in the Cariceae-Dulichieae-Scirpeae Clade (Cyperaceae).**  
In: Botanical Journal of the Linnean Society 176 (1), p. 1–21. DOI: 10.1111/boj.12193.
- LÉVEILLÉ-BOURRET, ÉTIENNE; STARR, JULIAN R.; FORD, BRUCE A. (2018):  
**Why are there so many Sedges? Sumatrosirpeae, a missing piece in the evolutionary Puzzle of the giant Genus *Carex* (Cyperaceae).**  
In: Molecular Phylogenetics and Evolution 119, p. 93–104. DOI: 10.1016/j.ympev.2017.10.025.
- MAGUILLA, ENRIQUE; ESCUDERO, MARCIAL; WATERWAY, MARCIA J.; HIPPEL, ANDREW L.; LUCEÑO, MODESTO (2015):  
**Phylogeny, Systematics, and trait Evolution of *Carex* Section *Glareosae*.**  
In: American Journal of Botany 102 (7), p. 1128–1144. DOI: 10.3732/ajb.1500169.
- MASSATTI, ROB; REZNICEK, ANTON A.; KNOWLES, L. LACEY (2016):  
**Utilizing RADseq Data for phylogenetic Analysis of challenging taxonomic Groups: A case Study in *Carex* Sect. *Racemosae*.**  
In: American Journal of Botany 103 (2), p. 337–347. DOI: 10.3732/ajb.1500315.
- MUASYA, A. MUTHAMA; SIMPSON, DAVID A.A.; CHASE, MARK W. (2002):  
**Phylogenetic Relationships in *Cyperus* L. s.l. (Cyperaceae) inferred from Plastid DNA Sequence Data.**  
In: Botanical Journal of the Linnean Society 138 (2), p. 145–153. DOI: 10.1046/j.1095-8339.2002.138002145.x.
- MUASYA, A. MUTHAMA; SIMPSON, DAVID A.A.; VERBOOM, GEORGE ANTHONY; GOETGHEBEUR, PAUL; NACZI, ROBERT F. C.; CHASE, MARK W.; SMETS, ERIK (2009):  
**Phylogeny of Cyperaceae based on DNA Sequence Data: Current Progress and Future Prospects.**  
In: the Botanical Review 75 (1), p. 2–21. DOI: 10.1007/s12229-008-9019-3.
- MUASYA, A. MUTHAMA; VILJOEN, JAN-ADRIAAN; DLUDLU, MESHACK N.; DEMISSEW, SEBSEBE (2014):  
**Phylogenetic Position of *Cyperus clandestinus* (Cypereae, Cyperaceae) clarified by morphological and molecular Evidence.**  
In: Nordic Journal of Botany 32 (1), p. 106–114. DOI: 10.1111/j.1756-1051.2012.01700.x.
- MUSILI, PAUL M.; GIBBS, ADELE K.; WILSON, KAREN L.; BRUHL, JEREMY J. (2016):  
***Schoenus* (Cyperaceae) is not monophyletic based on ITS nrDNA Sequence Data.**  
In: Australian Systematic Botany 29 (5), p. 265. DOI: 10.1071/SB15046.
- MUTHAMA MUASYA, A.; SIMPSON, DAVID A.A.; CHASE, MARK W.; CULHAM, ALASTAIR (2001):  
**A Phylogeny of *Isolepis* (Cyperaceae) inferred using Plastid *rbcl* and *trnL-F* Sequence Data.**  
In: Systematic Botany 26 (2), p. 342–353.



- POINDEXTER, DERICK B.; NACZI, ROBERT F. C. (2014):  
**Taxonomy and geographic Distribution of *Carex lucorum* var. *australucorum* (section *Acrocystis*, Cyperaceae).**  
In: Brittonia 66 (4), p. 358–370. DOI: 10.1007/s12228-014-9348-y.
- REID, CHRISTOPHER S.; CARTER, RICHARD J.; URBATSCH, LOWELL E. (2014):  
**Phylogenetic Insights into New World *Cyperus* (Cyperaceae) using nuclear ITS Sequences.**  
In: Brittonia 66 (3), p. 292–305. DOI: 10.1007/s12228-014-9324-6.
- REYNDERS, MARC; VRIJDAGHS, ALEXANDER; LARRIDON, ISABEL; HUYGH, WIM; LEROUX, OLIVIER; MUASYA, A. MUTHAMA; GOETGHEBEUR, PAUL (2012):  
**Gynoecial Anatomy and development in Cyperoideae (Cyperaceae, Poales): congenital fusion of Carpels facilitates evolutionary Modifications in Pistil Structure.**  
In: Plant Ecology and Evolution 145 (1), p. 96–125. DOI: 10.5091/plecevo.2012.675.
- REZNICEK, ANTON A.; ELIZONDO, M. SOCORRO GONZÁLEZ (2008):  
***Cypringlea* (Cyperaceae) revisited, a new Combination and Status.**  
In: Acta Botanica Mexicana 83, p. 13–23.
- ROALSON, ERIC H.; FRIAR, ELIZABETH A. (2000):  
**Infrageneric Classification of *Eleocharis* (Cyperaceae) Revisited: Evidence from the Internal Transcribed Spacer (ITS) Region of Nuclear Ribosomal DNA.**  
In: Systematic Botany 25 (2), p. 323–336. DOI: 10.2307/2666645.
- ROALSON, ERIC H.; FRIAR, ELIZABETH A. (2004):  
**Phylogenetic Analysis of the nuclear Alcohol Dehydrogenase (Adh) Gene Family in *Carex* Section *Acrocystis* (Cyperaceae) and combined Analyses of Adh and nuclear ribosomal ITS and ETS Sequences for inferring Species Relationships.**  
In: Molecular Phylogenetics and Evolution 33 (3), p. 671–686. DOI: 10.1016/j.ympev.2004.08.005.
- ROALSON, ERIC H.; FRIAR, ELIZABETH A. (2004):  
**Phylogenetic Relationships and biogeographic Patterns in North American members of *Carex* Section *Acrocystis* (Cyperaceae) using nrDNA ITS and ETS Sequence Data.**  
In: Plant Systematics and Evolution 243 (3-4), p. 175–187. DOI: 10.1007/s00606-003-0089-8.
- ROALSON, ERIC H.; HINCHLIFF, CODY E.; TREVISAN, RAFAEL; DA SILVA, CARLOS ROBERTO MAXIMIANO (2010):  
**Phylogenetic Relationships in *Eleocharis* (Cyperaceae): C4 Photosynthesis Origins and Patterns of Diversification in the Spikerushes.**  
In: Systematic Botany 35 (2), p. 257–271. DOI: 10.1600/036364410791638270.
- RYE, BARBARA L.; BARRETT, RUSSELL L.; BARRETT, MATTHEW D.; BRUHL, JEREMY J.; CLARKE, KERRI L.; WILSON, KAREN L. (2015):  
**Five new Species and a new Combination in Cyperaceae from the Kimberley Region of Western Australia.**  
In: Nuytsia 26, p. 167–184.
- SHEKHOVTSOV, SERGEI V.; SHEKHOVTSOVA, IRINA N.; PELTEK, SERGEI E. (2012):  
**Phylogeny of Siberian Species of *Carex* Sect. *Vesicariae* based on nuclear and Plastid Markers.**  
In: Nordic Journal of Botany 30 (3), p. 343–351. DOI: 10.1111/j.1756-1051.2011.01405.x.
- SIMPSON, DAVID A.A.; FURNESS, CAROL A.; HODKINSON, TREVOR R.; MUASYA, A. MUTHAMA; CHASE, MARK W. (2003):

**Phylogenetic Relationships in Cyperaceae Subfamily Mapanioideae inferred from Pollen and Plastid DNA Sequence Data.**

In: American Journal of Botany 90 (7), p. 1071–1086. DOI: 10.3732/ajb.90.7.1071.

**SIMPSON, DAVID A.A.; MUASYA, A. MUTHAMA; CHAYAMARIT, KONGKANDA; PARNELL, JOHN A.N.; SUDDEE, SOMRAN; WILDE, BART D. E. ET AL. (2005):**

***Khaosokia caricoides*, a new Genus and Species of Cyperaceae from Thailand.**

In: Botanical Journal of the Linnean Society 149 (3), p. 357–364. DOI: 10.1111/j.1095-8339.2005.00446.x.

**SIMPSON, DAVID A.A.; MUTHAMA MUASYA, A.; ALVES, MARCCUS V.; BRUHL, JEREMY J.; DHOOGHE, SANDRA; CHASE, MARK W. ET AL. (2007):**

**Phylogeny of Cyperaceae based on DNA Sequence Data—a new rbcL Analysis.**

In: Aliso 23 (1), p. 72–83.

**SLINGSBY, JASPER A.; BRITTON, MATTHEW N.; VERBOOM, GEORGE ANTHONY (2014):**

**Ecology limits the Diversity of the Cape Flora: Phylogenetics and Diversification of the Genus *Tetralix*.**

In: Molecular Phylogenetics and Evolution 72, p. 61–70. DOI: 10.1016/j.ympev.2013.11.017.

**STARR, JULIAN R.; FORD, BRUCE A. (2009):**

**Phylogeny and Evolution in Cariceae (Cyperaceae): Current Knowledge and Future Directions.**

In: the Botanical Review 75 (1), p. 110–137. DOI: 10.1007/s12229-008-9020-x.

**STARR, JULIAN R.; HARRIS, STEPHEN A.; SIMPSON, DAVID A.A. (2003):**

**Potential of the 5' and 3' Ends of the Intergenic Spacer (IGS) of rDNA in the Cyperaceae: new Sequences for Lower-level Phylogenies in Sedges with an Example from *Uncinia* Pers.**

In: International Journal of Plant Sciences 164 (2), p. 213–227.

**STARR, JULIAN R.; HARRIS, STEPHEN A.; SIMPSON, DAVID A.A. (2004):**

**Phylogeny of the Unispicate Taxa in Cyperaceae Tribe Cariceae I: Generic Relationships and evolutionary Scenarios.**

In: Systematic Botany 29 (3), p. 528–544. DOI: 10.1600/0363644041744455.

**STARR, JULIAN R.; JANZEN, FRANCESCO H.; FORD, BRUCE A. (2015):**

**Three new, early diverging *Carex* (Cariceae, Cyperaceae) Lineages from East and Southeast Asia with important evolutionary and biogeographic Implications.**

In: Molecular Phylogenetics and Evolution 88, p. 105–120. DOI: 10.1016/j.ympev.2015.04.001.

**THOMAS, WILLIAM WAYT; ARAÚJO, ANA CLAUDIA; ALVES, MARCCUS VINÍCIUS (2009):**

**A Preliminary molecular Phylogeny of the Rhynchosporeae (Cyperaceae).**

In: the Botanical Review 75 (1), p. 22–29. DOI: 10.1007/s12229-008-9023-7.

**VERBOOM, GEORGE ANTHONY (2006):**

**A Phylogeny of the Schoenoid Sedges (Cyperaceae: Schoeneae) based on Plastid DNA Sequences, with special Reference to the Genera found in Africa.**

In: Molecular Phylogenetics and Evolution 38 (1), p. 79–89. DOI: 10.1016/j.ympev.2005.05.012.

**VILJOEN, JAN-ADRIAAN; MUASYA, A. MUTHAMA; BARRETT, RUSSELL L.; BRUHL, JEREMY J.; GIBBS, ADELE K.; SLINGSBY, JASPER A. ET AL. (2013):**

**Radiation and repeated transoceanic Dispersal of Schoeneae (Cyperaceae) through the Southern Hemisphere.**

In: American Journal of Botany 100 (12), p. 2494–2508. DOI: 10.3732/ajb.1300105.

- WATERWAY, MARCIA J.; HOSHINO, TAKUJI; MASAKI, TOMOMI (2009):**  
**Phylogeny, Species Richness, and Ecological Specialization in Cyperaceae Tribe Cariceae.**  
In: the Botanical Review 75 (1), p. 138–159. DOI: 10.1007/s12229-008-9024-6.
- WATERWAY, MARCIA J.; MARTINS, KYLE T.; DABROS, ANNA; PRADO, ALBERTO; LECHOWICZ, MARTIN J. (2016):**  
**Ecological and evolutionary Diversification Within the Genus *Carex* (Cyperaceae): Consequences for Community Assembly in subarctic Fens.**  
In: Systematic Botany 41 (3), p. 558–579. DOI: 10.1600/036364416X692514.
- WATERWAY, MARCIA J.; STARR, JULIAN R. (2007):**  
**Phylogenetic Relationships in Tribe Cariceae (Cyperaceae) based on nested Analyses of four molecular Data Sets.**  
In: Aliso 23 (1), p. 165–192.
- YANG, PEIZHI; ZHENG, HONGMEI; LARSON, STEVEN; MIAO, YANJUN; HU, TIANMING (2010):**  
**Phylogenetic Relationships of eleven *Kobresia* accessions from the Tibetan Plateau.**  
In: African Journal of Biotechnology 9 (23), p. 3359–3367.
- YANO, OKIHITO; HOSHINO, TAKUJI (2005):**  
**Molecular Phylogeny and Chromosomal Evolution of Japanese *Schoenoplectus* (Cyperaceae), based on ITS and ETS1f Sequences.**  
In: Acta Phytotaxonomica Geobotanica 56 (2), p. 183–195.
- YANO, OKIHITO; HOSHINO, TAKUJI (2006):**  
**Phylogenetic Relationships *Fimbristylis* (Cyperaceae) and Chromosomal Evolution of Japanese using nrDNA ITS and ETS If Sequence Data.**  
In: Acta Phytotaxonomica Geobotanica 57 (3), p. 205–217.
- YANO, OKIHITO; IKEDA, HIROSHI; JIN, XIAO-FENG; HOSHINO, TAKUJI (2014):**  
**Phylogeny and chromosomal Variations in East Asian *Carex*, *Siderostictae* Group (Cyperaceae), based on DNA Sequences and cytological Data.**  
In: Journal of Plant Research 127 (1), p. 99–107. DOI: 10.1007/s10265-013-0578-y.
- YANO, OKIHITO; IKEDA, HIROSHI; WATSON, MARK F.; RAJBHANDARI, KESHAB R.; JIN, XIAO-FENG; HOSHINO, TAKUJI ET AL. (2012):**  
**Phylogenetic Position of the Himalayan Genus *Erioscirpus* (Cyperaceae) inferred from DNA Sequence Data.**  
In: Botanical Journal of the Linnean Society 170 (1), p. 1–11. DOI: 10.1111/j.1095-8339.2012.01255.x.
- YANO, OKIHITO; KATSUYAMA, TERUO; TSUBOTA, HIROMI; HOSHINO, TAKUJI (2004):**  
**Molecular Phylogeny of Japanese *Eleocharis* (Cyperaceae) based on ITS Sequence Data, and chromosomal Evolution.**  
In: Journal of Plant Research 117 (5), p. 409–419. DOI: 10.1007/s10265-004-0173-3.
- YEN, ALAN C.; OLMSTEAD, RICHARD G. (2000):**  
**Molecular Systematics of Cyperaceae Tribe Cariceae based on two Chloroplast DNA Regions: *ndhF* and *trnL* Intron-Intergenic Spacer.**  
In: Systematic Botany 25 (3), p. 479–494. DOI: 10.2307/2666691.
- ZHANG, XIUFU; BRUHL, JEREMY J.; WILSON, KAREN L.; MARCHANT, ADAM (2007):**  
**Phylogeny of *Carpha* and related Genera (Schoeneae, Cyperaceae) inferred from morphological and molecular Data.**  
In: Australian Systematic Botany 20 (2), p. 93–106. DOI: 10.1071/SB06023.

ZHANG, XIUFU; MARCHANT, ADAM; WILSON, KAREN L.; BRUHL, JEREMY J. (2004):

**Phylogenetic Relationships of *Carpha* and its relatives (Schoeneae, Cyperaceae) inferred from Chloroplast trnL Intron and trnL-trnF intergenic Spacer Sequences.**

In: Molecular Phylogenetics and Evolution 31 (2), p. 647–657. DOI: 10.1016/j.ympev.2003.09.004.

ZHANG, XIUFU; WILSON, KAREN L.; BRUHL, JEREMY J. (2006):

**Species limits in *Carpha* (Schoeneae, Cyperaceae) based on phenetic Analyses.**

In: Australian Systematic Botany 19 (5), p. 437–465. DOI: 10.1071/SB06003.

## Cytinaceae

NICKRENT, DANIEL LEE (2007):

**Cytinaceae are sister to Muntingiaceae (Malvales).**

In: Taxon 56 (4), p. 1129–1135. DOI: 10.2307/25065907.

## Davalliaceae

TSUTSUMI, CHIE; CHEN, CHENG-WEI; LARSSON, ANDERS; HIRAYAMA, YUMIKO; KATO, MASAHIRO (2016):

**Phylogeny and Classification of Davalliaceae on the basis of Chloroplast and nuclear Markers.**

In: Taxon 65 (6), p. 1236–1248. DOI: 10.12705/656.2.

TSUTSUMI, CHIE; ZHANG, XIAN-CHUN; KATO, MASAHIRO (2008):

**Molecular Phylogeny of Davalliaceae and Implications for Generic Classification.**

In: Systematic Botany 33 (1), p. 44–48.

## Dennstaedtiaceae

DER, JOSHUA P.; THOMSON, JOHN A.; STRATFORD, JERAN K.; WOLF, PAUL G. (2009):

**Global Chloroplast Phylogeny and Biogeography of Bracken (*Pteridium*; Dennstaedtiaceae).**

In: American Journal of Botany 96 (5), p. 1041–1049.

LUONG, THIEN TAM; HOVENKAMP, PETER H.; SOSEF, MARC P. M. (2015):

**Revision of the Fern Genus *Orthiopteris* (Saccolomataceae) in Malesia and adjacent Regions.**

In: PhytoKeys (53), p. 39–71. DOI: 10.3897/phytokeys.53.4955.

PERRIE, LEON R.; SHEPHERD, LARA D.; BROWNSEY, PATRICK J. (2015):

**An expanded Phylogeny of the Dennstaedtiaceae Ferns: *Oenotrichia* falls within a non-monophyletic *Dennstaedtia*, and *Saccoloma* is polyphyletic.**

In: Australian Systematic Botany 28 (4), p. 256–264. DOI: 10.1071/SB15035.

SCHWARTSBURD, PEDRO BOND; PRADO, JEFFERSON (2016):

**A taxonomic Revision of the South American Species of *Hypolepis* (Dennstaedtiaceae), Part II.**

In: American Fern Journal 106 (1), p. 1–53. DOI: 10.1640/0002-8444-106.1.1.

WOLF, PAUL G.; SOLTIS, PAMELA S.; SOLTIS, DOUGLAS E. (1994):

**Phylogenetic Relationships of Dennstaedtioid Ferns: Evidence from rbcL Sequences.**

In: Molecular Phylogenetics and Evolution 3 (4), p. 383–392.

ZHOU, SHILIANG; DONG, WEN-PAN; CHEN, XIAOQING; ZHANG, XIAN-CHUN; WEN, JUN; SCHNEIDER, HARALD (2014):

**How many Species of Bracken (*Pteridium*) are there? Assessing the Chinese Brackens using molecular Evidence.**

In: Taxon 63 (3), p. 509–521. DOI: 10.12705/633.9.

## Diapensiaceae

HIGASHI, HIROYUKI; IKEDA, HAJIME; SETOGUCHI, HIROAKI (2015):

**Molecular Phylogeny of *Shortia* sensu lato (Diapensiaceae) based on multiple nuclear Sequences.**

In: *Plant Systematics and Evolution* 301 (2), p. 523–529. DOI: 10.1007/s00606-014-1088-7.

## Dichapetalaceae

AMORIM, ANDRÉ M.; LISBOA, DÉCIO S.; MARINHO, LUCAS C.; FIASCHI, PEDRO (2016):

**Novelties in *Tapura* (Dichapetalaceae) from the Brazilian Atlantic Forest.**

In: *Systematic Botany* 41 (3), p. 747–757. DOI: 10.1600/036364416X692523.

## Didiereaceae

APPLEQUIST, WENDY L.; WALLACE, ROBERT P. (2000):

**Phylogeny of the Madagascan endemic Family Didiereaceae.**

In: *Plant Systematics and Evolution* 221, p. 157–166.

## Didymochlaenaceae

ZHANG, LI-BING; ZHANG, LIANG (2015):

**Didymochlaenaceae: A new Fern Family of Eupolypods I (Polypodiales).**

In: *Taxon* 64 (1), p. 27–38. DOI: 10.12705/641.4.

## Dilleniaceae

AYMARD, GERARDO A.C. (2017):

**Novelties in Neotropical Dilleniaceae.**

In: *Journal of the Botanical Research Institute of Texas* 11 (1), p. 45–51.

HORN, JAMES W. (2009):

**Phylogenetics of Dilleniaceae using Sequence Data from four Plastid Loci (RBCL, *infA*, *rps4*, *rpl16* Intron).**

In: *International Journal of Plant Sciences* 170 (6), p. 794–813. DOI: 10.1086/599239.

## Dioncophyllaceae

HEUBL, GÜNTHER; BRINGMANN, GERHARD; MEIMBERG, HARALD (2006):

**Molecular Phylogeny and Character Evolution of carnivorous Plant Families in Caryophyllales--revisited.**

In: *Plant Biology* 8 (6), p. 821–830. DOI: 10.1055/s-2006-924460.

## Dioscoreaceae

GAO, XING; ZHU, YU-PING; WU, BAO-CHENG; ZHAO, YA-MEI; JIAN-QUN; HANG, CHEN YUE-YU (2008):

**Phylogeny of *Dioscorea* Sect. *Stenophora* based on Chloroplast *matK*, *rbcl* and *trnL-F* Sequences.**

In: *Journal of Systematics and Evolution* 46 (3), p. 315–321.

HSU, K.-M.; TSAI, J.-L.; CHEN, M.-Y.; KU, H.-M.; LIU, S.-C. (2013):

**Molecular Phylogeny of *Dioscorea* (Dioscoreaceae) in East and Southeast Asia.**

In: *Blumea* 58 (1), p. 21–27. DOI: 10.3767/000651913X669022.

MUKHERJEE, PAPIYA; BHAT, K. V. (2013):

**Phylogenetic Relationship of wild and cultivated yam Species (*Dioscorea* spp.) of India inferred from Pcr-rflp Analysis of two cpDNA loci.**

In: *Plant Systematics and Evolution* 299 (8), p. 1587–1597. DOI: 10.1007/s00606-013-0847-1.

WILKIN, PAUL; SCHOLS, PETER; CHASE, MARK W.; CHAYAMARIT, KONGKANDA; FURNESS, CAROL A.; HUYSMANS, SUZY ET AL. (2005):

**A Plastid Gene Phylogeny of the Yam Genus, *Dioscorea*: Roots, Fruits and Madagascar.**

In: Systematic Botany 30 (4), p. 736–749. DOI: 10.1600/036364405775097879.

## Dipsacaceae

AVINO, M.; TORTORIELLO, G.; CAPUTO, P. (2009):

**A phylogenetic Analysis of Dipsacaceae based on four DNA Regions.**

In: Plant Systematics and Evolution 279 (1-4), p. 69–86. DOI: 10.1007/s00606-009-0147-y.

CAPUTO, P.; COZZOLINO, SALVATORE; MORETTI, A. (2004):

**Molecular Phylogenetics of Dipsacaceae reveals parallel Trends in Seed Dispersal Syndromes.**

In: Plant Systematics and Evolution 246 (3-4). DOI: 10.1007/s00606-004-0154-y.

CARLSON, SARA E.; HOWARTH, DIANELLA G.; DONOGHUE, MICHAEL J. (2011):

**Diversification of Cycloidea-like Genes in Dipsacaceae (Dipsacales): Implications for the Evolution of Capitulum Inflorescences.**

In: BMC Evolutionary Biology 11, p. 325. DOI: 10.1186/1471-2148-11-325.

CARLSON, SARA E.; MAYER, VERONIKA; DONOGHUE, MICHAEL J. (2009):

**Phylogenetic Relationships, Taxonomy, and morphological Evolution in Dipsacaceae (Dipsacales) inferred by DNA Sequence Data.**

In: Taxon 58 (4), p. 1075–1091.

FRAJMAN, BOŽO; REŠETNIK, IVANA; WEISS-SCHNEEWEISS, HANNA; EHRENDORFER, FRIEDRICH; SCHÖNSWETTER, PETER (2015):

**Cytotype Diversity and Genome Size Variation in *Knautia* (Caprifoliaceae, Dipsacoideae).**

In: BMC Evolutionary Biology 15, p. 140. DOI: 10.1186/s12862-015-0425-y.

MAYER, VERONIKA; EHRENDORFER, FRIEDRICH (2013):

**The phylogenetic Position of *Pterocephalidium* and the new African Genus *Pterothamnus* within an improved Classification of Dipsacaceae.**

In: Taxon 62 (1), p. 112–126.

REŠETNIK, IVANA; FRAJMAN, BOŽO; BOGDANOVIĆ, SANDRO; EHRENDORFER, FRIEDRICH; SCHÖNSWETTER, PETER (2014):

**Disentangling Relationships among the diploid Members of the intricate Genus *Knautia* (Caprifoliaceae, Dipsacoideae).**

In: Molecular Phylogenetics and Evolution 74, p. 97–110. DOI: 10.1016/j.ympev.2014.01.028.

## Dipterocarpaceae

CAO, CUI-PING; GAILING, OLIVER; SIREGAR, ISKANDAR; INDRIOKO, SAPTO; FINKELDEY, REINER (2006):

**Genetic Variation at AFLPs for the Dipterocarpaceae and its relation to molecular Phylogenies and taxonomic Subdivisions.**

In: Journal of Plant Research 119 (5), p. 553–558. DOI: 10.1007/s10265-006-0005-8.

CHOONG, CHEE YEN; WICKNESWARI, R.; NORWATI, M.; ABBOTT, RICHARD J. (2008):

**Phylogeny of *Hopea* (Dipterocarpaceae) inferred from Chloroplast DNA and nuclear PgiC Sequences.**

In: Molecular Phylogenetics and Evolution 48 (3), p. 1238–1243. DOI: 10.1016/j.ympev.2008.01.004.

DAYANANDAN, SELVADURAI; ASHTON, PETER SHAW; WILLIAMS, SCOTT M.; PRIMACK, RICHARD B. (1999):

**Phylogeny of the tropical Tree Family Dipterocarpaceae based on nucleotide Sequences of the Chloroplast RbcL gene.**

In: American Journal of Botany 86 (8), p. 1182–1190. DOI: 10.2307/2656982.

**INDRIOKO, SAPTO; GAILING, OLIVER; FINKELDEY, REINER (2006):**

**Molecular Phylogeny of Dipterocarpaceae in Indonesia based on Chloroplast DNA.**

In: Plant Systematics and Evolution 261 (1-4), p. 99–115. DOI: 10.1007/s00606-006-0435-8.

**KAJITA, TADASHI; KAMIYA, KOICHI; NAKAMURA, K.; TACHIDA, HIDENORI; WICKNESWARI, R.; TSUMURA, YOSHIHIKO ET AL. (1998):**

**Molecular Phylogeny of Dipterocarpaceae in Southeast Asia based on Nucleotide Sequences of matK, trnL Intron, and trnL-trnF Intergenic Spacer Region in Chloroplast DNA.**

In: Molecular Phylogenetics and Evolution 10 (2), p. 202–209. DOI: 10.1006/mpev.1998.0516.

**KAMIYA, KOICHI; HARADA, KO; TACHIDA, HIDENORI; ASHTON, PETER SHAW (2005):**

**Phylogeny of PgiC Gene in *Shorea* and its closely related Genera (Dipterocarpaceae), the dominant Trees in Southeast Asian tropical Rain Forests.**

In: American Journal of Botany 92 (5), p. 775–788. DOI: 10.3732/ajb.92.5.775.

**LI, QIAO-MING; HE, TIAN-HUA; XU, ZAI-FU (2004):**

**Generic Relationships of *Parashorea chinensis* WangHsie (Dipterocarpaceae) based on cpDNA Sequences.**

In: Taxon 53 (2), p. 461–466. DOI: 10.2307/4135622.

**MORTON, CYNTHIA M.; DAYANANDAN, SELVADURAI; DISSANAYAKE, D. (1999):**

**Phylogeny and Biosystematics of *Pseudomonotes* (Dipterocarpaceae) based on molecular and morphological Data.**

In: Plant Systematics and Evolution 216 (3-4), p. 197–205. DOI: 10.1007/BF01084398.

**TSUMURA, YOSHIHIKO; KADO, TOMOYUKI; YOSHIDA, KAZUMASA; ABE, HISASHI; OHTANI, MASATO; TAGUCHI, YURIKO ET AL. (2011):**

**Molecular Database for classifying *Shorea* Species (Dipterocarpaceae) and Techniques for checking the Legitimacy of Timber and Wood Products.**

In: Journal of Plant Research 124 (1), p. 35–48. DOI: 10.1007/s10265-010-0348-z.

**YULITA, KUSUMADEWI S.; BAYER, RANDALL J.; WEST, JUDITH G. (2005):**

**Molecular phylogenetic Study of *Hopea* and *Shorea* (Dipterocarpaceae): Evidence from the trnL-trnF and internal transcribed Spacer Regions.**

In: Plant Species Biology 20 (3), p. 167–182. DOI: 10.1111/j.1442-1984.2005.00136.x.

## **Dombeyaceae**

**APPLEQUIST, WENDY L. (2009):**

**A Revision of the Malagasy Endemic *Helmiopsis* (Malvaceae s.l.).**

In: Annals of the Missouri Botanical Garden 96 (4), p. 521–540. DOI: 10.3417/2007184.

**LE PÉCHON, TIMOTHÉE; CAO, NATHANAËL; DUBUISSON, JEAN-YVES; GIGORD, LUC D.B. (2009):**

**Systematics of Dombeyoideae (Malvaceae) in the Mascarene Archipelago (Indian Ocean) inferred from Morphology.**

In: Taxon 58 (2), p. 519–531. DOI: 10.1002/tax.582016.

**LE PÉCHON, TIMOTHÉE; DAI, QIANG; ZHANG, LI-BING; GAO, XIN-FEN; SAUQUET, HERVÉ (2015):**

**Diversification of Dombeyoideae (Malvaceae) in the Mascarenes: Old Taxa on Young Islands?**

In: International Journal of Plant Sciences 176 (3), p. 211–221. DOI: 10.1086/679350.

**LE PÉCHON, TIMOTHÉE; DUBUISSON, JEAN-YVES; HAEVERMANS, THOMAS; CRUAUD, CORINNE; COULOUX, ARNAUD; GIGORD, LUC D.B. (2010):**

**Multiple colonizations from Madagascar and converged Acquisition of Dioecy in the Mascarene Dombeyoideae (Malvaceae) as inferred from Chloroplast and nuclear DNA Sequence Analyses.**

In: Annals of Botany 106 (2), p. 343–357. DOI: 10.1093/aob/mcq116.

**SKEMA, CYNTHIA (2012):**

**Toward a new Circumscription of *Dombeya* (Malvales: Dombeyaceae): A molecular phylogenetic and morphological Study of *Dombeya* of Madagascar and a new segregate Genus, *Andringitra*.**

In: Taxon 61 (3), p. 612–628. DOI: 10.1002/tax.613010.

**WILKIE, PETER (2007):**

**A new Species of *Pterospermum* (Dombeyoideae, Malvaceae/sterculiaceae) from Cambodia and Vietnam.**

In: Edinburgh Journal of Botany 64 (2), p. 179–183. DOI: 10.1017/S0960428607000881.

**WON, HYOSIG (2009):**

**Phylogenetic Position of *Corchoropsis* Siebold & Zucc. (Malvaceae s.l.) inferred from Plastid DNA Sequences.**

In: Journal of Plant Biology 52 (5), p. 411–416. DOI: 10.1007/s12374-009-9052-8.

## **Droseraceae**

**GONELLA, PAULO M.; FLEISCHMANN, ANDREAS; RIVADAVIA, FERNANDO; NEILL, DAVID A.; SANO, PAULO TAKEO (2016):  
A Revision of *Drosera* (Droseraceae) from the central and northern Andes, including a new Species from the Cordillera del Cóndor (Peru and Ecuador).**

In: Plant Systematics and Evolution 302 (10), p. 1419–1432. DOI: 10.1007/s00606-016-1341-3.

**RIVADAVIA, FERNANDO; KONDO, KATSUHIKO; KATO, MASAHIRO; HASEBE, MITSUYASU (2003):**

**Phylogeny of the Sundews, *Drosera* (Droseraceae), based on Chloroplast *rbcl* and nuclear 18s ribosomal DNA Sequences.**

In: American Journal of Botany 90 (1), p. 123–130. DOI: 10.3732/ajb.90.1.123.

## **Dryopteridaceae**

**CANESTRARO, BIANCA KALINOWSKI; LABIAK, PAULO HENRIQUE (2015):**

**The Fern Genus *Polybotrya* (Dryopteridaceae) in the Atlantic Forest of Brazil, with the Description of a new Species.**

In: Brittonia 67 (3), p. 191–215. DOI: 10.1007/s12228-015-9369-1.

**CHANG, YI-HAN; KUO, LI-YAUNG; CHIOU, WEN-LIANG; CHEN, CHENG-WEI; CHANG, HO-MING; AMOROSO, VICTOR B. (2013):**

***Stenolepia* Alderw. (Dryopteridaceae), a Fern Genus new to the Philippines.**

In: Philippine Journal of Science 142, p. 83–88.

**DRISCOLL, HEATHER E.; BARRINGTON, DAVID P. (2007):**

**Origin of Hawaiian *Polystichum* (Dryopteridaceae) in the Context of a World Phylogeny.**

In: American Journal of Botany 94 (8), p. 1413–1424.

**GEIGER, JENNIFER M.O.; RANKER, TOM A. (2005):**



**Molecular Phylogenetics and historical Biogeography of Hawaiian *Dryopteris* (Dryopteridaceae).**

In: *Molecular Phylogenetics and Evolution* 34 (2), p. 392–407. DOI: 10.1016/j.ympev.2004.11.001.

**HENNEQUIN, SABINE; ROUHAN, GERMINAL; SALINO, ALEXANDRE; DUAN, YI-FAN; LEPEIGNEUX, MARIE-CAPUCINE; GUILLOU, MARGUERITE ET AL. (2017):**

**Global Phylogeny and Biogeography of the Fern Genus *Ctenitis* (Dryopteridaceae), with a focus on the Indian Ocean Region.**

In: *Molecular Phylogenetics and Evolution* 112, p. 277–289. DOI: 10.1016/j.ympev.2017.04.012.

**JUSLÉN, AINO; VÄRE, HENRY; WIKSTRÖM, NIKLAS (2011):**

**Relationships and evolutionary Origins of polyploid *Dryopteris* (Dryopteridaceae) from Europe inferred using nuclear *pgiC* and Plastid *trnL-F* Sequence Data.**

In: *Taxon* 60 (5), p. 1284–1294.

**LABIAK, PAULO HENRIQUE; SUNDUE, MICHAEL A.; ROUHAN, GERMINAL; HANKS, JUDITH GARRISON; MICKEL, JOHN T.; MORAN, ROBBIN C. (2014):**

**Phylogeny and historical Biogeography of the Lastreopsis Ferns (Dryopteridaceae).**

In: *American Journal of Botany* 101 (7), p. 1207–1228. DOI: 10.3732/ajb.1400071.

**LABIAK, PAULO HENRIQUE; SUNDUE, MICHAEL A.; ROUHAN, GERMINAL; MORAN, ROBBIN C. (2015):**

**New Combinations in *Lastreopsis* and *Parapolystichum* (Dryopteridaceae).**

In: *Brittonia* 67 (1), p. 79–86. DOI: 10.1007/s12228-014-9351-3.

**LEE, SANG-JUN; PARK, CHONG-WOOK (2013):**

**Relationships and Origins of the *Dryopteris varia* (L.) Kuntze Species complex (Dryopteridaceae) in Korea inferred from nuclear and Chloroplast DNA Sequences.**

In: *Biochemical Systematics and Ecology* 50, p. 371–382. DOI: 10.1016/j.bse.2013.05.008.

**LI, CHUN-XIANG; LU, SHU-GANG (2006):**

**Phylogenetics of Chinese *Dryopteris* (Dryopteridaceae) based on the Chloroplast *rps4-trnS* Sequence Data.**

In: *Journal of Plant Research* 119 (6), p. 589–598. DOI: 10.1007/s10265-006-0003-x.

**LI, CHUN-XIANG; LU, SHU-GANG; BARRINGTON, DAVID P. (2008):**

**Phylogeny of Chinese *Polystichum* (Dryopteridaceae) based on Chloroplast DNA Sequence Data (*trnL-F* and *rps4-trnS*).**

In: *Journal of Plant Research* 121 (1), p. 19–26. DOI: 10.1007/s10265-007-0120-1.

**LI, CHUN-XIANG; SHU-GANG, LU (2006):**

**Phylogenetic Analysis of Dryopteridaceae based on Chloroplast *rbcl* Sequences.**

In: *Acta Phytotaxonomica Sinica* 44 (5), p. 503–515. DOI: 10.1360/aps050081.

**LITTLE, DAMON P.; BARRINGTON, DAVID P. (2003):**

**Major evolutionary Events in the Origin and Diversification of the Fern Genus *Polystichum* (Dryopteridaceae).**

In: *American Journal of Botany* 90 (3), p. 508–514.

**LIU, HONG-MEI; ZHANG, XIAN-CHUN; WANG, MEI-PING; SHANG, HUI; ZHOU, SHI-LIANG; YAN, YUE-HONG ET AL. (2016):**

**Phylogenetic Placement of the enigmatic Fern Genus *Trichoneuron* informs on the infra-familial Relationship of Dryopteridaceae.**

In: *Plant Systematics and Evolution* 302 (3), p. 319–332. DOI: 10.1007/s00606-015-1265-3.

**LIU, HONG-MEI; ZHANG, XIAN-CHUN; WANG, WEI; QIU, YIN-LONG; CHEN, ZHI-DUAN (2007):**

**Molecular Phylogeny of the Fern Family Dryopteridaceae inferred from Chloroplast rbc L and atp B Genes.**

In: International Journal of Plant Sciences 168 (9), p. 1311–1323. DOI: 10.1086/521710.

**LIU, HONG-MEI; ZHANG, XIAN-CHUN; WANG, WEI; ZENG, HUI (2010):**

**Molecular Phylogeny of the endemic Fern Genera *Cyrtomidictyum* and *Cyrtogonellum* (Dryopteridaceae) from East Asia.**

In: Organisms Diversity and Evolution 10 (1), p. 57–68. DOI: 10.1007/s13127-010-0010-6.

**LÓRIGA, JOSMAILY; SCHMIDT, ALEXANDER R.; MORAN, ROBBIN C.; FELDBERG, KATHRIN; SCHNEIDER, HARALD; HEINRICHS, JOCHEN (2014):**

**The first fossil of a bolbitidoid Fern belongs to the early-divergent Lineages of *Elaphoglossum* (Dryopteridaceae).**

In: American Journal of Botany 101 (9), p. 1466–1475. DOI: 10.3732/ajb.1400262.

**LÓRIGA, JOSMAILY; VASCO, ALEJANDRA; REGALADO, LEDIS; HEINRICHS, JOCHEN; MORAN, ROBBIN C. (2014):**

**Phylogeny and Classification of the Cuban Species of *Elaphoglossum* (Dryopteridaceae), with Description of *Elaphoglossum* Sect. *Wrightiana* Sect. nov.**

In: Plant Systematics and Evolution 300 (5), p. 937–951. DOI: 10.1007/s00606-013-0933-4.

**LU, JIN-MEI; BARRINGTON, DAVID S.; LI, DE-ZHU (2007):**

**Molecular Phylogeny of the Polystichoid Ferns in Asia based on rbcL Sequences.**

In: Systematic Botany 32 (1), p. 26–33.

**LYONS, BRENDAN M.; MCHENRY, MONIQUE A.; BARRINGTON, DAVID P. (2017):**

**Insights into Evolution in Andean *Polystichum* (Dryopteridaceae) from expanded Understanding of the cytosolic Phosphoglucose Isomerase Gene.**

In: Molecular Phylogenetics and Evolution 112, p. 36–46. DOI: 10.1016/j.ympev.2017.04.010.

**MCHENRY, MONIQUE A.; BARRINGTON, DAVID P. (2014):**

**Phylogeny and Biogeography of exindusiate Andean *Polystichum* (Dryopteridaceae).**

In: American Journal of Botany 101 (2), p. 365–375. DOI: 10.3732/ajb.1300191.

**MCHENRY, MONIQUE A.; SUNDUE, MICHAEL A.; BARRINGTON, DAVID P. (2013):**

**The Fern Genus *Adenoderris* (Family incertae sedis) is artificial.**

In: Taxon 62 (6), p. 1153–1160. DOI: 10.12705/626.13.

**MORAN, ROBBIN C.; HANKS, JUDITH GARRISON; LABIAK, PAULO HENRIQUE; SUNDUE, MICHAEL A. (2010):**

**Perispore Morphology of Bolbitidoid Ferns (Dryopteridaceae) in Relation to Phylogeny.**

In: International Journal of Plant Sciences 171 (8), p. 872–881. DOI: 10.1086/655856.

**MORAN, ROBBIN C.; HANKS, JUDITH GARRISON; ROUHAN, GERMINAL (2007):**

**Spore Morphology in Relation to Phylogeny in the Fern Genus *Elaphoglossum* (Dryopteridaceae).**

In: International Journal of Plant Sciences 168 (6), p. 905–929.

**MORAN, ROBBIN C.; LABIAK, PAULO HENRIQUE (2015):**

**Phylogeny of the Polybotryoid Fern Clade (Dryopteridaceae).**

In: International Journal of Plant Sciences 176 (9), p. 880–891. DOI: 10.1086/683393.

**RO, JACOBUS P. (2012):**

**A Revision of the Fern Genus *Dryopteris* (Dryopteridaceae) in Sub-Saharan Africa.**

In: Phytotaxa 70, p. 1–118.

- ROUHAN, GERMINAL; DUBUISSON, JEAN-YVES; RAKOTONDRAINIBE, FRANCE; MOTLEY, TIMOTHY J.; MICKEL, JOHN T.; LABAT, JEAN-NOEL; MORAN, ROBBIN C. (2004):  
**Molecular Phylogeny of the Fern Genus *Elaphoglossum* (Elaphoglossaceae) based on Chloroplast non-coding DNA Sequences: contributions of Species from the Indian Ocean area.**  
 In: *Molecular Phylogenetics and Evolution* 33 (3), p. 745–763. DOI: 10.1016/j.ympev.2004.08.006.
- SANO, R.; TAKAMIYA, MASAYUKI; ITO, MOTOMI; KURITA, S.; HASEBE, M. (2000):  
**Phylogeny of the lady Fern Group, Tribe Physematieae (Dryopteridaceae), based on Chloroplast *rbcl* Gene Sequences.**  
 In: *Molecular Phylogenetics and Evolution* 15 (3), p. 403–413. DOI: 10.1006/mpev.1999.0708.
- SESSA, EMILY B.; ZIMMER, ELIZABETH A.; GIVNISH, THOMAS J. (2012):  
**Phylogeny, Divergence times, and historical Biogeography of New World *Dryopteris* (Dryopteridaceae).**  
 In: *American Journal of Botany* 99 (4), p. 730–750. DOI: 10.3732/ajb.1100294.
- SESSA, EMILY B.; ZIMMER, ELIZABETH A.; GIVNISH, THOMAS J. (2012):  
**Reticulate Evolution on a global scale: a nuclear Phylogeny for New World *Dryopteris* (Dryopteridaceae).**  
 In: *Molecular Phylogenetics and Evolution* 64 (3), p. 563–581. DOI: 10.1016/j.ympev.2012.05.009.
- SESSA, EMILY B.; ZIMMER, ELIZABETH A.; GIVNISH, THOMAS J. (2012):  
**Unraveling reticulate Evolution in North American *Dryopteris* (Dryopteridaceae).**  
 In: *BMC Evolutionary Biology* 12, p. 104. DOI: 10.1186/1471-2148-12-104.
- SKOG, JUDITH E.; MICKEL, JOHN T.; MORAN, ROBBIN C.; VOLOVSEK, MIGUEL; ZIMMER, ELIZABETH A. (2004):  
**Molecular Studies of Representative Species in the Fern Genus *Elaphoglossum* (Dryopteridaceae) based on cpDNA Sequences *rbcl*, *trnL-F*, and *rps4-trnS*.**  
 In: *International Journal of Plant Sciences* 165 (6), p. 1063–1075.
- VASCO, ALEJANDRA; MORAN, ROBBIN C.; ROUHAN, GERMINAL (2009):  
**Circumscription and Phylogeny of the *Elaphoglossum ciliatum* Group (*E. Sect. Lepidoglossa*, Dryopteridaceae) based on cpDNA Sequences.**  
 In: *Taxon* 58 (3), p. 825–834.
- ZHANG, LI-BING; HE, HAI (2010):  
***Polystichum speluncicola* sp. nov. (Sect. *Haplopolystichum*, Dryopteridaceae) based on Morphological, Palynological, and molecular Evidence with Reference to the Non-Monophyly of *Cyrtogonellum*.**  
 In: *Systematic Botany* 35 (1), p. 13–19. DOI: 10.1600/036364410790862605.
- ZHANG, LI-BING; ZHANG, LIANG (2012):  
**The inclusion of *Acrophorus*, *Diacalpe*, *Nothoperanema*, and *Peranema* in *Dryopteris*: the molecular Phylogeny, Systematics, and Nomenclature of *Dryopteris* Subg. *Nothoperanema* (Dryopteridaceae).**  
 In: *Taxon* 61 (6), p. 1199–1216.
- ZHANG, LI-BING; ZHANG, LIANG; DONG, SHI-YONG; SESSA, EMILY B.; GAO, XIN-FEN; EBIHARA, ATSUSHI (2012):  
**Molecular Circumscription and major evolutionary Lineages of the Fern Genus *Dryopteris* (Dryopteridaceae).**  
 In: *BMC Evolutionary Biology* 12, p. 180. DOI: 10.1186/1471-2148-12-180.

## Ebenaceae

BERRY, PAUL E.; SAVOLAINEN, VINCENT; SYTSMA, K. J.; HALL, J.C.; CHASE, MARK W. (2001):

***Lissocarpa* is sister to *Diospyros* (Ebenaceae).**

In: Kew Bulletin 56, p. 725–729.

DU, XIN-YU; ZHANG, Q. L.; LUO, ZHENG-RONG (2009):

**Comparison of four molecular Markers for genetic Analysis in *Diospyros* L. (Ebenaceae).**

In: Plant Systematics and Evolution 281 (1-4), p. 171–181. DOI: 10.1007/s00606-009-0199-z.

DUANGJAI, SUTEE; SAMUEL, ROSABELLE; MUNZINGER, JÉRÔME; FOREST, FÉLIX; WALLNÖFER, BRUNO; BARFUSS, MICHAEL H. J. ET AL. (2009):

**A multi-locus Plastid phylogenetic Analysis of the pantropical Genus *Diospyros* (Ebenaceae), with an Emphasis on the Radiation and biogeographic Origins of the New Caledonian endemic Species.**

In: Molecular Phylogenetics and Evolution 52 (3), p. 602–620. DOI: 10.1016/j.ympev.2009.04.021.

DUANGJAI, SUTEE; WALLNÖFER, BRUNO; SAMUEL, ROSABELLE; MUNZINGER, JÉRÔME; CHASE, MARK W. (2006):

**Generic Delimitation and Relationships in Ebenaceae sensu lato: Evidence from six Plastid DNA Regions.**

In: American Journal of Botany 93 (12), p. 1808–1827. DOI: 10.3732/ajb.93.12.1808.

PAUN, OVIDIU; TURNER, BARBARA; TRUCCHI, EMILIANO; MUNZINGER, JÉRÔME; CHASE, MARK W.; SAMUEL, ROSABELLE (2016):

**Processes driving the adaptive Radiation of a tropical Tree (*Diospyros*, Ebenaceae) in New Caledonia, a Biodiversity Hotspot.**

In: Systematic Biology 65 (2), p. 212–227. DOI: 10.1093/sysbio/syv076.

TURNER, BARBARA; MUNZINGER, JÉRÔME; DUANGJAI, SUTEE; TEMSCH, EVA M.; STOCKENHUBER, REINHOLD; BARFUSS, MICHAEL H. J. ET AL. (2013):

**Molecular Phylogenetics of New Caledonian *Diospyros* (Ebenaceae) using Plastid and nuclear Markers.**

In: Molecular Phylogenetics and Evolution 69 (3), p. 740–763. DOI: 10.1016/j.ympev.2013.07.002.

TURNER, BARBARA; PAUN, OVIDIU; MUNZINGER, JÉRÔME; DUANGJAI, SUTEE; CHASE, MARK W.; SAMUEL, ROSABELLE (2013):

**Analyses of amplified fragment length polymorphisms (Aflp) indicate rapid Radiation of *Diospyros* Species (Ebenaceae) endemic to New Caledonia.**

In: BMC Evolutionary Biology 13, p. 269. DOI: 10.1186/1471-2148-13-269.

VENKATASAMY, SHADILA; KHITTOO, GOVINDRANATHSING; NOWBUTH, PRAKASH; VENCATASAMY, DASS ROY (2006):

**Phylogenetic Relationships based on Morphology among the *Diospyros* (Ebenaceae) Species endemic to the Mascarene Islands.**

In: Botanical Journal of the Linnean Society 150 (3), p. 307–313. DOI: 10.1111/j.1095-8339.2006.00474.x.

## Ecdeicoleaceae

MARCHANT, ADAM; BRIGGS, BARBARA G. (2007):

**Ecdeicoleaceae and Joinvilleaceae, sisters of Poaceae (Poales): Evidence from rbcL and matK Data.**

In: Telopea 11 (4), p. 437–450. DOI: 10.7751/telopea20075743.

## Ehretiaceae

GOTTSCHLING, MARC; HILGER, HARTMUT H. (2004):

**The Systematic Position of *Ehretia cortesia* nom. nov. (identical to *Cortesia cuneifolia*: Ehretiaceae, Boraginales) inferred from molecular and morphological Data.**

In: Taxon 53 (4), p. 919. DOI: 10.2307/4135559.

**GOTTSCHLING, MARC; LUEBERT, FEDERICO; HILGER, HARTMUT H.; MILLER, JAMES P. (2014):**

**Molecular Delimitations in the Ehretiaceae (Boraginales).**

In: Molecular Phylogenetics and Evolution 72, p. 1–6. DOI: 10.1016/j.ympev.2013.12.005.

**GOTTSCHLING, MARC; MILLER, JAMES P. (2007):**

**A Revision of *Bourreria* (Boraginales, Ehretiaceae) in South America.**

In: Annals of the Missouri Botanical Garden 94 (4), p. 734–744. DOI: 10.3417/0026-6493(2007)94[734:AROBBE]2.0.CO;2.

**IRIMIA, RAMONA-ELENA; PÉREZ-ESCOBAR, OSCAR ALEJANDRO; GOTTSCHLING, MARC (2015):**

**Strong biogeographic Signal in the phylogenetic Relationships of *Rochefortia* Sw. (Ehretiaceae, Boraginales).**

In: Plant Systematics and Evolution 301 (5), p. 1509–1516. DOI: 10.1007/s00606-014-1162-1.

## **Elaeagnaceae**

**SON, OGYEONG; YOON, CHANG YOUNG; PARK, SEON-JOO (2014):**

**Phylogenetic Relationships in Korean *Elaeagnus* L. based on nrDNA ITS Sequences.**

In: Korean Journal of Plant Resources 27 (6), p. 671–679. DOI: 10.7732/kjpr.2014.27.6.671.

**SUN, K.; CHEN, X.; MA, R.; LI, C.; WANG, Q.; GE, SONG (2002):**

**Molecular Phylogenetics of *Hippophae* L. (Elaeagnaceae) based on the Internal Transcribed Spacer (ITS) Sequences of nrDNA.**

In: Plant Systematics and Evolution 235 (1), p. 121–134. DOI: 10.1007/s00606-002-0206-0.

## **Elaeocarpaceae**

**BUTCHER, RYONEN; BYRNE, MARGARET; CRAYN, DARREN M. (2007):**

**Evidence for convergent Evolution among phylogenetically distant rare Species of *Tetratheca* (Elaeocarpaceae, formerly Tremandraceae) from Western Australia.**

In: Australian Systematic Botany 20 (2), p. 126–138. DOI: 10.1071/SB06017.

**CRAYN, DARREN M.; ROSSETTO, MAURIZIO; MAYNARD, DAVID J. (2006):**

**Molecular Phylogeny and Dating reveals an Oligo-Miocene Radiation of dry-adapted Shrubs (former Tremandraceae) from rainforest Tree Progenitors (Elaeocarpaceae) in Australia.**

In: American Journal of Botany 93 (9), p. 1328–1342. DOI: 10.3732/ajb.93.9.1328.

**DOWNING, TRISHA L.; LADIGES, PAULINE Y.; DURETTO, MARCO F. (2008):**

**Trichome Morphology provides phylogenetically informative Characters for *Tremandra*, *Platytheca* and *Tetratheca* (former Tremandraceae).**

In: Plant Systematics and Evolution 271 (3-4), p. 199–221. DOI: 10.1007/s00606-007-0622-2.

## **Elatinaceae**

**CAI, LIMING; XI, ZHENXIANG; PETERSON, KYLEE; RUSHWORTH, CATHERINE A.; BEAULIEU, JEREMY M.; DAVIS, CHARLES C. (2016):**

**Phylogeny of Elatinaceae and the Tropical Gondwanan Origin of the Centropilaceae (Malpighiaceae, Elatinaceae) Clade.**

In: Public Library of Science One 11 (9), e0161881. DOI: 10.1371/journal.pone.0161881.

## Ephedraceae

HUANG, JINLING; GIANNASI, DAVID E.; PRICE, ROBERT A. (2005):

**Phylogenetic Relationships in *Ephedra* (Ephedraceae) inferred from Chloroplast and nuclear DNA Sequences.**

In: *Molecular Phylogenetics and Evolution* 35 (1), p. 48–59. DOI: 10.1016/j.ympev.2004.12.020.

ICKERT-BOND, STEFANIE M.; WOJCIECHOWSKI, MARTIN F. (2004):

**Phylogenetic Relationships in *Ephedra* (Gnetales): Evidence from Nuclear and Chloroplast DNA Sequence Data.**

In: *Systematic Botany* 29 (4), p. 834–849. DOI: 10.1600/0363644042451143.

LOERA, ISRAEL; SOSA, VICTORIA; ICKERT-BOND, STEFANIE M. (2012):

**Diversification in North American arid Lands: Niche Conservatism, Divergence and Expansion of habitat explain Speciation in the Genus *Ephedra*.**

In: *Molecular Phylogenetics and Evolution* 65 (2), p. 437–450. DOI: 10.1016/j.ympev.2012.06.025.

RYDIN, CATARINA; KORALL, PETRA (2009):

**Evolutionary Relationships in *Ephedra* (Gnetales), with Implications for Seed Plant Phylogeny.**

In: *International Journal of Plant Sciences* 170 (8), p. 1031–1043. DOI: 10.1086/605116.

## Equisetaceae

DES MARAIS, DAVID L.; SMITH, ALAN R.; BRITTON, DONALD M.; PRYER, KATHLEEN M. (2003):

**Phylogenetic Relationships and Evolution of extant Horsetails, *Equisetum*, based on Chloroplast DNA Sequence Data (*rbcl* and *trnL-F*).**

In: *International Journal of Plant Sciences* 164 (5), p. 737–751.

GUILLON, JEAN-MICHEL (2004):

**Phylogeny of Horsetails (*Equisetum*) based on the Chloroplast *rps4* Gene and Adjacent Noncoding Sequences.**

In: *Systematic Botany* 29 (2), p. 251–259. DOI: 10.1600/036364404774195467.

GUILLON, JEAN-MICHEL (2007):

**Molecular Phylogeny of horsetails (*Equisetum*) including Chloroplast *atpB* Sequences.**

In: *Journal of Plant Research* 120 (4), p. 569–574. DOI: 10.1007/s10265-007-0088-x.

## Ericaceae

ALBRECHT, D. E.; OWENS, C. T.; WEILLER, C. M.; QUINN, CHRISTOPHER J. (2010):

**Generic Concepts in Ericaceae: Styphelioideae - the *Monotoca* Group.**

In: *Australian Systematic Botany* 23 (5), p. 320–332. DOI: 10.1071/SB10009.

ARGENT, G. (2014):

**A Contribution to the Study of the Genus *Diplycosia* (Ericaceae) in Sulawesi, Indonesia.**

In: *Edinburgh Journal of Botany* 71 (1), p. 83–115. DOI: 10.1017/S0960428613000309.

BOYKIN, LAURA M.; VASEY, MICHAEL C.; PARKER, V. THOMAS; PATTERSON, ROBERT W. (2005):

**Two Lineages of *Arctostaphylos* (Ericaceae) identified using the Internal Transcribed Spacer (ITS) Region of the nuclear Genome.**

In: *Madroño* 52 (3), p. 139–147. DOI: 10.3120/0024-9637(2005)52[139:TLOAEI]2.0.CO;2.

BROWN, G. K.; CRAVEN, L. A.; UDOVICIC, FRANK; LADIGES, PAULINE Y. (2006):

**Phylogeny of *Rhododendron Section Vireya* (Ericaceae) based on two non-coding Regions of cpDNA.**

In: *Plant Systematics and Evolution* 257 (1-2), p. 57–93. DOI: 10.1007/s00606-005-0367-8.

**BROWN, GILLIAN K.; CRAVEN, LYN A.; UDOVICIC, FRANK; LADIGES, PAULINE Y. (2006):**

**Phylogenetic Relationships of *Rhododendron Section Vireya* (Ericaceae) inferred from the ITS nrDNA Region.**

In: *Australian Systematic Botany* 19 (4), p. 329–342. DOI: 10.1071/SB05019.

**BUSH, CATHERINE M.; JUDD, WALTER S.; FRAZIER, LOUIS; KRON, KATHLEEN A. (2010):**

**The Phylogeny of *Leucothoë* s. l. (Ericaceae: Vaccinioideae) based on morphological and molecular (ndhF, matK, and nrITS) Data.**

In: *Systematic Botany* 35 (1), p. 201–206. DOI: 10.1600/036364410790862443.

**BUSH, CATHERINE M.; KRON, KATHLEEN A. (2008):**

**A Phylogeny of *Bejaria* (Ericaceae: Ericoideae) based on molecular Data.**

In: *Journal of the Botanical Research Institute of Texas* 2 (2), p. 1193–1205.

**BUSH, CATHERINE M.; LU, LU; FRITSCH, PETER W.; LI, DE-ZHU; KRON, KATHLEEN A. (2009):**

**Phylogeny of *Gaultherieae* (Ericaceae: Vaccinioideae) based on DNA Sequence Data from matK, ndhF, and nrITS.**

In: *International Journal of Plant Sciences* 170 (3), p. 355–364. DOI: 10.1086/596330.

**BUSH, CATHERINE M.; WAGSTAFF, STEVEN J.; FRITSCH, PETER W.; KRON, KATHLEEN A. (2009):**

**The Phylogeny, Biogeography and morphological Evolution of *Gaultheria* (Ericaceae) from Australia and New Zealand.**

In: *Australian Systematic Botany* 22 (4), p. 229. DOI: 10.1071/SB08049.

**CHUNG, JENG-DER; LIN, TSAN-PIAO; CHEN, YU-LING; CHENG, YU-PIN; HWANG, SHIH-YING (2007):**

**Phylogeographic Study reveals the Origin and evolutionary History of a *Rhododendron* Species complex in Taiwan.**

In: *Molecular Phylogenetics and Evolution* 42 (1), p. 14–24. DOI: 10.1016/j.ympev.2006.06.027.

**CRAYN, DARREN M.; QUINN, CHRISTOPHER J. (2000):**

**The Evolution of the atpbeta-rbcl intergenic spacer in the Epacrids (Ericales) and its systematic and evolutionary Implications.**

In: *Molecular Phylogenetics and Evolution* 16 (2), p. 238–252. DOI: 10.1006/mpev.2000.0794.

**DORR, LAURENCE J. (2006):**

**New Combinations in *Erica* (Ericaceae: Ericoideae) from the High Mountains of East Africa.**

In: *Novon: A Journal for Botanical Nomenclature* 16 (1), p. 56–58. DOI: 10.3417/1055-3177(2006)16[56:NCIEEE]2.0.CO;2.

**FLOYD, JENNIFER WHITEHEAD (2002):**

**Phylogenetic and Biogeographic Patterns in *Gaylussacia* (Ericaceae) based on Morphological, nuclear DNA, and Chloroplast DNA Variation.**

In: *Systematic Botany* 27 (1), p. 99–115.

**FRITSCH, PETER W.; LU, LU; BUSH, CATHERINE M.; CRUZ, BONI C.; KRON, KATHLEEN A.; LI, DE-ZHU (2011):**

**Phylogenetic Analysis of the Wintergreen Group (Ericaceae) based on six genic Regions.**

In: *Systematic Botany* 36 (4), p. 990–1003. DOI: 10.1600/036364411X604994.

**GILLESPIE, EMILY; KRON, KATHLEEN A. (2010):**

**Molecular phylogenetic Relationships and a revised Classification of the Subfamily Ericoideae (Ericaceae).**

In: *Molecular Phylogenetics and Evolution* 56 (1), p. 343–354. DOI: 10.1016/j.ympev.2010.02.028.

GOETSCH, LORETTA A.; CRAVEN, LYN A.; HALL, BENJAMIN D. (2011):

**Major Speciation accompanied the Dispersal of *Vireya* Rhododendrons (Ericaceae, *Rhododendron* Sect. *Schistanthe*) through the Malayan archipelago: Evidence from nuclear Gene Sequences.**

In: *Taxon* 60 (4), p. 1015–1028.

GOETSCH, LORETTA A.; ECKERT, ANDREW J.; HALL, BENJAMIN D. (2005):

**The molecular Systematics of *Rhododendron* (Ericaceae): A Phylogeny based Upon RPB2 Gene Sequences.**

In: *Systematic Botany* 30 (3), p. 616–626.

HART, ROBBIE; GEORGIAN, ELIZABETH M.; SALICK, JAN (2016):

**Fast and cheap in the fall: phylogenetic determinants of late flowering phenologies in Himalayan *Rhododendron*.**

In: *American Journal of Botany* 103 (2), p. 198–206. DOI: 10.3732/ajb.1500440.

HILEMAN, LENA C.; VASEY, MICHAEL C.; PARKER, V. THOMAS (2001):

**Phylogeny and Biogeography of the Arbutoideae (Ericaceae): Implications for the Madrean-Tethyan Hypothesis.**

In: *Systematic Botany* 26 (1), p. 131–143.

HIRAI, MASASHI; YOSHIMURA, SAYURI; OHSAKO, TAKANORI; KUBO, NAKAO (2010):

**Genetic Diversity and phylogenetic Relationships of the endangered Species *Vaccinium sieboldii* and *Vaccinium ciliatum* (Ericaceae).**

In: *Plant Systematics and Evolution* 287 (1-2), p. 75–84. DOI: 10.1007/s00606-010-0291-4.

HISLOP, MICHAEL; PUENTE-LELIÈVRE, CAROLINE; CRAYN, DARREN M. (2012):

***Leucopogon extremus* (Styphelieae, Styphelioideae, Ericaceae), a remarkable new Species that expands the morphological Circumscription of *Leucopogon* sens. str.**

In: *Australian Systematic Botany* 25 (3), p. 202–209. DOI: 10.1071/SB11033.

HOU, YAN; NOWAK, MICHAEL D.; MIRRÉ, VIRGINIA; BJORÅ, CHARLOTTE SLETTEN; BROCHMANN, CHRISTIAN; POPP, MAGNUS (2016):

**RAD-seq Data point to a northern Origin of the arctic-alpine Genus *Cassiope* (Ericaceae).**

In: *Molecular Phylogenetics and Evolution* 95, p. 152–160. DOI: 10.1016/j.ympev.2015.11.009.

IKEDA, HAJIME; YAKUBOV, VALENTIN; BARKALOV, VYACHESLAV; SETOGUCHI, HIROAKI (2014):

**Molecular Evidence for ancient Relicts of arctic-alpine plants in East Asia.**

In: *the new Phytologist* 203 (3), p. 980–988. DOI: 10.1111/nph.12863.

JIN, XIAO-FENG; DING, BING-YANG; JIN, SHUI-HU; QIAN, LI (2009):

**Taxonomic Revision of *Rhododendron mariae* (Ericaceae) and related taxa.**

In: *Nordic Journal of Botany* 27 (3), p. 186–202. DOI: 10.1111/j.1756-1051.2009.00316.x.

JOHNSON, KAREN A.; HOLLAND, BARBARA R.; HESLEWOOD, MARGARET M.; CRAYN, DARREN M. (2012):

**Supermatrices, Supertrees and serendipitous scaffolding: inferring a well-resolved, Genus-level Phylogeny of Styphelioideae (Ericaceae) despite missing Data.**

In: *Molecular Phylogenetics and Evolution* 62 (1), p. 146–158. DOI: 10.1016/j.ympev.2011.09.011.

KRON, KATHLEEN A.; POWELL, E. ANN; LUTEYN, JAMES L. (2002):



**Phylogenetic Relationships within the Blueberry Tribe (Vaccineae, Ericaceae) based on Sequence Data from matK and nuclear ribosomal ITS Regions, with Comments on the Placements of *Satyria*.**

In: American Journal of Botany 89 (2), p. 327–336.

**KURASHIGE, Y.; ETOH, J.-I.; HANDA, TAKASHI; TAKAYANAGI, K.; YUKAWA, TOMOHISA (2001):**

**Sectional Relationships in the Genus *Rhododendron* (Ericaceae): Evidence from matK and trn K Intron Sequences.**

In: Plant Systematics and Evolution 228 (1-2), p. 1–14. DOI: 10.1007/s006060170033.

**LI, J. (2002):**

**Phylogenetic Relationships of Empetraceae inferred from Sequences of Chloroplast Gene matK and nuclear ribosomal DNA ITS Region.**

In: Molecular Phylogenetics and Evolution 25 (2), p. 306–315. DOI: 10.1016/S1055-7903(02)00241-5.

**LI, MIMI; LI, JIAN-HUA; JIANG, JIN-HUO; FU, CHENG-XIN; JUDD, WALTER P. (2009):**

**Phylogenetics and Biogeography of *Pieris* (Lyonieae, Ericaceae) inferred from Sequences of Nuclear and Chloroplast Genomes.**

In: Systematic Botany 34 (3), p. 553–560. DOI: 10.1600/036364409789271272.

**LIAN-MING, GAO; DE-ZHU, LI; CHANG-QIN, ZHANG (2003):**

**Phylogenetic Relationships of *Rhododendron Section Azaleastrum* (Ericaceae) based on ITS Sequences.**

In: Acta Phytotaxonomica Sinica 41 (2), p. 173–179.

**LIU, ZHEN-WEN; WANG, ZE-HUAN; ZHOU, JING; PENG, HUA (2011):**

**Phylogeny of Pyroleae (Ericaceae): Implications for Character Evolution.**

In: Journal of Plant Research 124 (3), p. 325–337. DOI: 10.1007/s10265-010-0376-8.

**LIU, ZHEN-WEN; ZHOU, JING; LIU, EN-DE; PENG, HUA (2010):**

**A molecular Phylogeny and a new Classification of *Pyrola* (Pyroleae, Ericaceae).**

In: Taxon 59 (6), p. 1690–1700.

**MCGUIRE, AVERY F.; KRON, KATHLEEN A. (2005):**

**Phylogenetic Relationships of European and African Ericas.**

In: International Journal of Plant Sciences 166 (2), p. 311–318.

**MILNE, RICHARD IAN (2004):**

**Phylogeny and Biogeography of *Rhododendron* subsection *Pontica*, a Group with a tertiary Relict Distribution.**

In: Molecular Phylogenetics and Evolution 33 (2), p. 389–401. DOI: 10.1016/j.ympev.2004.06.009.

**MILNE, RICHARD IAN; DAVIES, CHANTEL; PRICKETT, RUBY; INNS, LUCY H.; CHAMBERLAIN, DAVID F. (2010):**

**Phylogeny of *Rhododendron* Subgenus *Hymenanthes* based on Chloroplast DNA Markers: between-lineage Hybridisation during adaptive Radiation?**

In: Plant Systematics and Evolution 285 (3-4), p. 233–244. DOI: 10.1007/s00606-010-0269-2.

**MUGRABI DE KUPPLER, A. L.; FAGÚNDEZ, J.; BELLSTEDT, DIRK U.; OLIVER, EDWARD G.H.; LÉON, J.; PIRIE, MICHAEL D. (2015):**

**Testing reticulate versus coalescent Origins of *Erica lusitanica* using a Species Phylogeny of the northern Heathers (Ericaceae, Ericaceae).**

In: Molecular Phylogenetics and Evolution 88, p. 121–131. DOI: 10.1016/j.ympev.2015.04.005.

**OLIVER, EDWARD G.H.; OLIVER, INGE M. (1991):**

**Studies in the Ericoideae (Ericaceae). VIII. new Species in *Erica*, Section *Pseuderemia*, from southern Africa.**

In: *Bothalia* 21 (2), p. 137–142. DOI: 10.4102/abc.v21i2.873.

**PEDRAZA-PEÑALOSA, PAOLA (2009):**

**Insensitive blueberries: a total-Evidence Analysis of *Disterigma* s.l. (Ericaceae) exploring Transformation Costs.**

In: *Cladistics* 26 (1), p. 388–407. DOI: 10.1111/j.1096-0031.2009.00293.x.

**PEDRAZA-PEÑALOSA, PAOLA (2009):**

**Systematics of the Neotropical Blueberry Genus *Disterigma* (Ericaceae).**

In: *Systematic Botany* 34 (2), p. 406–413. DOI: 10.1600/036364409788606352.

**PEDRAZA-PEÑALOSA, PAOLA (2016):**

**Three new Species of *Psammisia* s.l. (Ericaceae: Vaccinieae), Blueberry Relatives endemic to Colombia.**

In: *Brittonia* 68 (1), p. 25–36. DOI: 10.1007/s12228-015-9388-y.

**PEDRAZA-PEÑALOSA, PAOLA; LUTEYN, JAMES L. (2011):**

**Andean *Vaccinium* (Ericaceae: Vaccinieae): Seven new Species from South America.**

In: *Brittonia* 63 (2), p. 257–275.

**PEDRAZA-PEÑALOSA, PAOLA; SALINAS, NELSON R.; VIRNIG, ANNE LUCY S.; WHEELER, WARD C. (2015):**

**Preliminary phylogenetic Analysis of the Andean Clade and the Placement of new Colombian Blueberries (Ericaceae, Vaccinieae).**

In: *PhytoKeys* (49), p. 13–31. DOI: 10.3897/phytokeys.49.8622.

**PEDRAZA-PEÑALOSA, PAOLA; SALINAS, NELSON R.; WHEELER, WARD C. (2013):**

**Venation Patterns of Neotropical Blueberries (Vaccinieae: Ericaceae) and their phylogenetic utility.**

In: *Phytotaxa* 96 (1), p. 1. DOI: 10.11646/phytotaxa.96.1.1.

**PIRIE, MICHAEL D.; OLIVER, EDWARD G.H.; BELLSTEDT, DIRK U. (2011):**

**A densely sampled ITS Phylogeny of the Cape flagship Genus *Erica* L. suggests numerous shifts in Floral Macro-Morphology.**

In: *Molecular Phylogenetics and Evolution* 61 (2), p. 593–601. DOI: 10.1016/j.ympev.2011.06.007.

**POWELL, E. ANN; KRON, KATHLEEN A. (2002):**

**Hawaiian Blueberries and their Relatives—A phylogenetic Analysis of *Vaccinium* Sections *Macropelma*, *Myrtillus*, and *Hemimyrtilus* (Ericaceae).**

In: *Systematic Botany* 27 (4), p. 768–779.

**POWELL, E. ANN; KRON, KATHLEEN A. (2003):**

**Molecular Systematics of the Northern Andean Blueberries (Vaccinieae, Vaccinioideae, Ericaceae).**

In: *International Journal of Plant Sciences* 164 (6), p. 987–995.

**PUENTE-LELIÈVRE, CAROLINE; HARRINGTON, MARK G.; BROWN, ELIZABETH A.; KUZMINA, MARIA; CRAYN, DARREN M. (2013):**

**Cenozoic extinction and Recolonization in the New Zealand Flora: the case of the fleshy-fruited Epacrids (Styphelieae, Styphelioideae, Ericaceae).**

In: *Molecular Phylogenetics and Evolution* 66 (1), p. 203–214. DOI: 10.1016/j.ympev.2012.09.027.

**PUENTE-LELIÈVRE, CAROLINE; HISLOP, MICHAEL; HARRINGTON, MARK G.; BROWN, ELIZABETH A.; KUZMINA, MARIA; CRAYN, DARREN M. (2015):**

**A five-marker molecular Phylogeny of the Styphelieae (Epacridoideae, Ericaceae) supports a broad Concept of *Styphelia*.**

In: Australian Systematic Botany 28 (6), p. 368–387. DOI: 10.1071/SB14041.

QUINN, CHRISTOPHER J.; CROWDEN, RONALD K.; BROWN, ELIZABETH A.; SOUTHAM, MICHAEL J.; THORNHILL, ANDREW H.; CRAYN, DARREN M. (2015):

**A reappraisal of the generic Concepts of *Epacris*, *Rupicola* and *Budawangia* (Ericaceae, Epacridoideae, Epacrideae) based on phylogenetic Analysis of morphological and molecular Data.**

In: Australian Systematic Botany 28 (1), p. 63–77. DOI: 10.1071/SB13009.

SCHWERY, ORLANDO; ONSTEIN, RENSK E.; BOUCHENAK-KHELLADI, YANIS; XING, YAOWU; CARTER, RICHARD J.; LINDER, HANS PETER (2015):

**As old as the Mountains: the Radiations of the Ericaceae.**

In: the new Phytologist 207 (2), p. 355–367. DOI: 10.1111/nph.13234.

SETOGUCHI, HIROAKI; WATANABE, W.; MAEDA, Y.; PENG, CHING-I. (2008):

**Molecular Phylogeny of the Genus *Pieris* (Ericaceae) with special Reference to phylogenetic Relationships of insular Plants on the Ryukyu Islands.**

In: Plant Systematics and Evolution 270 (3-4), p. 217–230. DOI: 10.1007/s00606-007-0600-8.

TONG, YI HUA; XIA, NIAN-HE (2014):

**New Taxa of *Agapetes* (Ericaceae) from Myanmar.**

In: Phytotaxa 184 (1), p. 39. DOI: 10.11646/phytotaxa.184.1.5.

TSAI, CHI-CHU; CHEN, CHIH-HUI; CHOU, CHANG-HUNG (2012):

**DNA barcodes reveal high levels of morphological plasticity among *Rhododendron* Species (Ericaceae) in Taiwan.**

In: Biochemical Systematics and Ecology 40, p. 169–177. DOI: 10.1016/j.bse.2011.10.013.

TSUKAYA, HIROKAZU; YOKOYAMA, JUN U.N.; IMAICHI, RYOKO; OHBA, HIDEAKI (2008):

**Taxonomic Status of *Monotropastrum humile*, with special Reference to *M. humile* var. *glaberrimum* (Ericaceae, Monotropeoideae).**

In: Journal of Plant Research 121 (3), p. 271–278. DOI: 10.1007/s10265-008-0157-9.

VAN DER KLOET, SAM P.; BALTZER, JENNIFER L.; APPLEBY, JULIA H.; EVANS, RODGER C.; STEWART, DONALD T. (2004):

**A re-examination of the taxonomic boundaries of *Symphysia* (Ericaceae).**

In: Taxon 53 (1), p. 91–98. DOI: 10.2307/4135492.

VANDER KLOET, P. P.; DICKINSON, TIMOTHY A. (2009):

**A subgeneric Classification of the Genus *Vaccinium* and the metamorphosis of *V.* Section *Bracteata* Nakai: more terrestrial and less epiphytic in Habit, more continental and less insular in Distribution.**

In: Journal of Plant Research 122 (3), p. 253–268. DOI: 10.1007/s10265-008-0211-7.

WAGSTAFF, STEVEN J.; DAWSON, MURRAY I.; VENTER, STEPHANUS; MUNZINGER, JÉRÔME; CRAYN, DARREN M.; STEANE, DOROTHY A.; LEMSON, KRISTINA L. (2010):

**Origin, Diversification, and Classification of the Australasian Genus *Dracophyllum* (Richeeae, Ericaceae).**

In: Annals of the Missouri Botanical Garden 97 (2), p. 235–258. DOI: 10.3417/2008130.

WASELKOV, KATHERINE; JUDD, WALTER P. (2008):

**A phylogenetic Analysis of *Leucothoe* s.l. (Ericaceae; Tribe Gaultherieae) base on phenotypic Characters.**

In: Brittonia 60 (4), 382-297.

ZHANG, MING-YING; FRITSCH, PETER W.; MA, PENG-FEI; WANG, HONG; LU, LU; LI, DE-ZHU (2017):

**Plastid phylogenomics and adaptive Evolution of *Gaultheria* series *Trichophyllae* (Ericaceae), a Clade from Sky Islands of the Himalaya-Hengduan Mountains.**

In: *Molecular Phylogenetics and Evolution* 110, p. 7–18. DOI: 10.1016/j.ympev.2017.01.015.

## Ericales

ROSE, JEFFREY P.; KLEIST, THOMAS J.; LÖFSTRAND, STEFAN D.; DREW, BRYAN T.; SCHÖNENBERGER, JÜRGEN; SYTSMA, KENNETH J. (2018):

**Phylogeny, historical Biogeography, and Diversification of Angiosperm Order Ericales suggest ancient Neotropical and East Asian Connections.**

In: *Molecular Phylogenetics and Evolution* 122, p. 59–79. DOI: 10.1016/j.ympev.2018.01.014.

## Eriocaulaceae

ANDRADE, MARIA JOSÉ GOMES DE; GIULIETTI, ANA MARIA; HARLEY, RAYMOND MERVYN; VAN DEN BERG, CÁSSIO (2011):  
***Blastocaulon* (Eriocaulaceae), a synonym of *Paepalanthus*: morphological and molecular Evidence.**

In: *Taxon* 60 (1), p. 178–184.

ANDRADE, MARIA JOSÉ GOMES DE; GIULIETTI, ANA MARIA; RAPINI, ALESSANDRO; QUEIROZ, LUCIANO PAGANUCCI; CONCEIÇÃO, ADILVA DE SOUZA; ALMEIDA, PAULO RICARDO MACHADO DE; VAN DEN BERG, CÁSSIO (2010):

**A comprehensive phylogenetic Analysis of Eriocaulaceae: Evidence from nuclear (ITS) and Plastid (*psbA-trnH* and *trnL-F*) DNA Sequences.**

In: *Taxon* 59 (2), p. 379–388.

COSTA, FABIANE NEPOMUEENO (2013):

**New Circumscription of the Endemic Brazilian Genus *Actinocephalus* (Eriocaulaceae).**

In: *Novon: A Journal for Botanical Nomenclature* 22, p. 281–287.

DAVIES, RICHARD J.-P.; CRAIGIE, ANDREW I.; MACKAY, DUNCAN A.; WHALEN, MOLLY A.; CHEONG, JUDY P.-E.; LEACH, GREGORY J. (2007):

**Resolution of the Taxonomy of *Eriocaulon* (Eriocaulaceae) Taxa endemic to Australian mound Springs, using Morphometrics and AFLP Markers.**

In: *Australian Systematic Botany* 20 (5), p. 428–447. DOI: 10.1071/SB07019.

ECHTERNACHT, LIVIA; SANO, PAULO TAKEO; BONILLO, CÉLINE; CRUAUD, CORINNE; COULOUX, ARNAUD; DUBUISSON, JEAN-YVES (2014):

**Phylogeny and Taxonomy of *Syngonanthus* and *Comanthera* (Eriocaulaceae): Evidence from expanded Sampling.**

In: *Taxon* 63 (1), p. 47–63. DOI: 10.12705/631.36.

ECHTERNACHT, LIVIA; SANO, PAULO TAKEO; DUBUISSON, JEAN-YVES (2015):

**Taxonomic Study of *Comanthera* Subg. *Thysanocephalus* (Eriocaulaceae).**

In: *Systematic Botany* 40 (1), p. 136–150. DOI: 10.1600/036364415X686431.

ECHTERNACHT, LIVIA; SANO, PAULO TAKEO; TROVÓ, MARCELO; DUBUISSON, JEAN-YVES (2011):

**Phylogenetic Analysis of the Brazilian microendemic *Paepalanthus* Subgenus *Xeractis* (Eriocaulaceae) inferred from Morphology.**

In: *Botanical Journal of the Linnean Society* 167 (2), p. 137–152. DOI: 10.1111/j.1095-8339.2011.01170.x.

GIULIETTI, ANA MARIA; ANDRADE, MARIA JOSÉ GOMES DE; SCATENA, VERA LUCIA; TROVÓ, MARCELO; COAN, ALESSANDRA I.; SANO, PAULO TAKEO ET AL. (2012):

**Molecular Phylogeny, Morphology and their Implications for the Taxonomy of Eriocaulaceae.**

In: *Rodriguésia* 63 (1), p. 1–19.

PARRA, LARA REGINA; GIULIETTI, ANA MARIA; ANDRADE, MARIA JOSÉ GOMES DE; VAN DEN BERG, CÁSSIO (2010):

**Re-establishment and new Circumscription of *Comanthera* (Eriocaulaceae).**

In: Taxon 59 (4), p. 1135–1146.

PHILLIPS, SYLVIA M.; MESTERHÁZY, ATTILA (2015):

**Revision of small ephemeral Species of *Eriocaulon* (Eriocaulaceae) in West Africa with long involucre Bracts.**

In: Kew Bulletin 70, p. 1–17. DOI: 10.1007/S12225-014-9557-2.

SANO, PAULO TAKEO (2004):

***Actinocephalus* (Körn.) Sano (*Paepalanthus* Sect. *Actinocephalus*), a new Genus of Eriocaulaceae, and other taxonomic and Nomenclatural Changes Involving *Paepalanthus* Mart.**

In: Taxon 53 (1), p. 99–107. DOI: 10.2307/4135493.

SCATENA, VERA LUCIA; GIULIETTI, ANA MARIA; BORBA, EDUARDO L.; VAN DEN BERG, CÁSSIO (2005):

**Anatomy of Brazilian Eriocaulaceae: correlation with Taxonomy and habitat using multivariate Analyses.**

In: Plant Systematics and Evolution 253 (1-4), p. 1–22. DOI: 10.1007/s00606-004-0295-z.

TROVÓ, MARCELO; ANDRADE, MARIA JOSÉ GOMES DE; SANO, PAULO TAKEO; RIBEIRO, PATRÍCIA LUZ; VAN DEN BERG, CÁSSIO (2013):

**Molecular Phylogenetics and Biogeography of Neotropical Paepalanthoideae with Emphasis on Brazilian *Paepalanthus* (Eriocaulaceae).**

In: Botanical Journal of the Linnean Society 171, p. 225–243.

TROVÓ, MARCELO; SANO, PAULO TAKEO (2010):

**Taxonomic survey of *Paepalanthus* Section *Diphyomene* (Eriocaulaceae).**

In: Phytotaxa 14 (1), p. 49–55. DOI: 10.11646/phytotaxa.14.1.4.

UNWIN, MATTHEW M. (2004):

**Molecular Systematics of the Eriocaulaceae Martinov.**

Dissertation. Miami University, Oxford, Ohio.

WATANABE, MAURICIO TAKASHI COUTINHO; HENSOLD, NANCY; SANO, PAULO TAKEO (2015):

**Tidying up the mess: Lectotype Selections, Synonyms, a new Status and a new Species in *Syngonanthus* Sect. *Carphocephalus* (Eriocaulaceae).**

In: Phytotaxa 226 (2), p. 157. DOI: 10.11646/phytotaxa.226.2.5.

## Erythroxylaceae

EMCHE, STEPHEN D.; ZHANG, DAPENG; ISLAM, MELISSA BAUER; BAILEY, BRYAN A.; MEINHARDT, LYNDEL W. (2011):

**AFLP Phylogeny of 36 *Erythroxylum* Species.**

In: Tropical Plant Biology 4 (2), p. 126–133. DOI: 10.1007/s12042-011-9070-9.

## Escalloniaceae

ESSER, HANS-JOACHIM; SAW, LENG GUAN (2015):

**A new Species of *Polyosma* (Escalloniaceae / Polyosmaceae) from Thailand and new Synonyms.**

In: Phytotaxa 221 (1), p. 89. DOI: 10.11646/phytotaxa.221.1.10.

SEDE, SILVANA M.; DÜRNHÖFER, SOFÍA I.; MORELLO, SANTIAGO; ZAPATA, FELIPE (2013):

**Phylogenetics of *Escallonia* (Escalloniaceae) based on Plastid DNA Sequence Data.**

In: Botanical Journal of the Linnean Society 173 (3), p. 442–451. DOI: 10.1111/boj.12091.

ZAPATA, FELIPE (2013):

**A multilocus phylogenetic Analysis of *Escallonia* (Escalloniaceae): Diversification in montane South America.**

In: American Journal of Botany 100 (3), p. 526–545. DOI: 10.3732/ajb.1200297.

**Euphorbiaceae**

**AUBRIOT, XAVIER; LOWRY, PORTER PRESCOTT II.; HAEVERMANS, THOMAS (2014):**

**Taxonomic Revision of the Malagasy endemic and enigmatic *Euphorbia* Section *Pachysanthae* (Euphorbiaceae).**

In: Phytotaxa 159 (3), p. 221. DOI: 10.11646/phytotaxa.159.3.5.

**BARRES, LAIA; VILATERSANA, ROSER; MOLERO, JULIÀ; SUSANNA, ALFONSO; GALBANY-CASALS, MERCÈ (2011):**

**Molecular Phylogeny of *Euphorbia* Subg. *Esula* Sect. *Aphyllis* (Euphorbiaceae) inferred from nrDNA and cpDNA Markers with biogeographic Insights.**

In: Taxon 60 (3), p. 705–720. DOI: 10.1002/tax.603007.

**BERRY, PAUL E.; HIPPI, ANDREW L.; WURDACK, KENNETH J.J.; VAN EE, BENJAMIN W.; RIINA, RICARDA (2005):**

**Molecular Phylogenetics of the giant Genus *Croton* and Tribe Crotonaeae (Euphorbiaceae sensu stricto) using ITS and TrnI-trnF DNA Sequence Data.**

In: American Journal of Botany 92 (9), p. 1520–1534. DOI: 10.3732/ajb.92.9.1520.

**BLATTNER, FRANK R.; WEISING, KURT; BÄNFER, G.; MASCHWITZ, ULRICH; FIALA, B. (2001):**

**Molecular Analysis of phylogenetic Relationships among Myrmecophytic *Macaranga* Species (Euphorbiaceae).**

In: Molecular Phylogenetics and Evolution 19 (3), p. 331–344. DOI: 10.1006/mpev.2001.0941.

**BRUYNS, PETER V.; KLAKE, CORNELIA; HANÁČEK, PAVEL (2011):**

**Age and Diversity in Old World succulent Species of *Euphorbia* (Euphorbiaceae).**

In: Taxon 60 (6), p. 1717–1733.

**BRUYNS, PETER V.; MAPAYA, RUVIMBO J.; HEDDERSON, TERRENCE J. (2006):**

**A new subgeneric Classification for *Euphorbia* (Euphorbiaceae) in southern Africa based on ITS and psbA-trnH Sequence Data.**

In: Taxon 55 (2), p. 397–420. DOI: 10.2307/25065587.

**CARDINAL-McTEAGUE, WARREN M.; GILLESPIE, LYNN J. (2016):**

**Molecular Phylogeny and Pollen Evolution of Euphorbiaceae Tribe Plukenetieae.**

In: Systematic Botany 41 (2), p. 329–347. DOI: 10.1600/036364416X691759.

**CARUZO, MARIA BEATRIZ R.; VAN EE, BENJAMIN W.; CORDEIRO, INÊS; BERRY, PAUL E.; RIINA, RICARDA (2011):**

**Molecular Phylogenetics and Character Evolution of the "*Sacaca*" Clade: novel Relationships of *Croton* Section *Cleodora* (Euphorbiaceae).**

In: Molecular Phylogenetics and Evolution 60 (2), p. 193–206. DOI: 10.1016/j.ympev.2011.04.013.

**CHACÓN, JULIANA; MADRIÑÁN, SANTIAGO; DEBOUCK, DANIEL; RODRIGUEZ, FAUSTO; TOHME, JOE (2008):**

**Phylogenetic Patterns in the Genus *Manihot* (Euphorbiaceae) inferred from Analyses of nuclear and Chloroplast DNA Regions.**

In: Molecular Phylogenetics and Evolution 49 (1), p. 260–267. DOI: 10.1016/j.ympev.2008.07.015.

**DE-NOVA, JOSÉ ARTURO; SOSA, VICTORIA (2007):**

**Phylogeny and generic Delimitation of *Adelia* (Euphorbiaceae) inferred from molecular and morphological Data.**

In: Taxon 56 (4), p. 1027–1036. DOI: 10.2307/25065902.

**DE-NOVA, JOSÉ ARTURO; SOSA, VICTORIA; STEINMANN, VICTOR W. (2007):**

**A Synopsis of *Adelia* (Euphorbiaceae s.s.).**

- In: *Systematic Botany* 32 (3), p. 583–595.
- DE-NOVA, JOSÉ ARTURO; SOSA, VICTORIA; WURDACK, KENNETH J.J. (2006):**  
**Phylogenetic Relationships and the Description of a new Species of *Enriquebeltrania* (Euphorbiaceae s.s.): An Enigmatic Genus Endemic to Mexico.**  
In: *Systematic Botany* 31 (3), p. 533–546.
- DORSEY, BRIAN L.; HAEVERMANS, THOMAS; AUBRIOT, XAVIER; MORAWETZ, JEFFERY J.; RIINA, RICARDA; STEINMANN, VICTOR W.; BERRY, PAUL E. (2013):**  
**Phylogenetics, morphological Evolution, and Classification of *Euphorbia* Subgenus *Euphorbia*.**  
In: *Taxon* 62 (2), p. 291–315. DOI: 10.12705/622.1.
- FATEMI, M.; GROSS, C. L.; BRUHL, J. J. (2007):**  
**The first phenetic Analysis of Species limits in *Bertya* (Euphorbiaceae).**  
In: *Australian Systematic Botany* 20 (5), p. 448–463. DOI: 10.1071/SB06019.
- FRAJMAN, BOŽO; SCHÖNSWETTER, PETER (2011):**  
**Giants and dwarfs: molecular Phylogenies reveal multiple Origins of annual Spurges within *Euphorbia* Subg. *Esula*.**  
In: *Molecular Phylogenetics and Evolution* 61 (2), p. 413–424. DOI: 10.1016/j.ympev.2011.06.011.
- GILLESPIE, LYNN J. (2007):**  
**A Revision of Paleotropical *Plukenetia* (Euphorbiaceae) including two new Species from Madagascar.**  
In: *Systematic Botany* 32 (4), p. 780–802.
- HALFORD, DAVID A.; HENDERSON, RODNEY J.F. (2005):**  
***Shonia* R.J.F.Hend. & Halford (Ricinocarpeae, Ricinocarpaceae), a new Australian endemic Genus.**  
In: *Austrobaileya* 7 (1), p. 215–228.
- HAND, RALF; HADJIKYRIAKOU, GEORGIOS N.; CHRISTODOULOU, CHARALAMBOS S.; FRAJMAN, BOŽO (2015):**  
**Multiple Origins of dendroid shrubs in the eastern Mediterranean *Euphorbia hierosolymitana* Group (Euphorbiaceae) with Description of a new Species, *Euphorbia lemesiana*, from Cyprus.**  
In: *Botanical Journal of the Linnean Society* 179 (2), p. 295–307. DOI: 10.1111/boj.12319.
- HOFFMANN, PETRA; MCPHERSON, GORDON (2007):**  
**Revision of *Wielandia*, Including *Blotia* and *Petalodiscus* (Phyllanthaceae; Euphorbiaceae S.I.).**  
In: *Annals of the Missouri Botanical Garden* 94 (3), p. 519–553. DOI: 10.3417/0026-6493(2007)94[519:ROWIBA]2.0.CO;2.
- HOFFMANN, PETRA; WURDACK, KENNETH J.J. (2006):**  
***Radcliffea*, a new Genus of Euphorbiaceae sensu stricto from Madagascar.**  
In: *Kew Bulletin* 61, p. 193–197.
- HORN, JAMES W.; VAN EE, BENJAMIN W.; MORAWETZ, JEFFERY J.; RIINA, RICARDA; STEINMANN, VICTOR W.; BERRY, PAUL E.; WURDACK, KENNETH J.J. (2012):**  
**Phylogenetics and the Evolution of major structural Characters in the giant Genus *Euphorbia* L. (Euphorbiaceae).**  
In: *Molecular Phylogenetics and Evolution* 63 (2), p. 305–326. DOI: 10.1016/j.ympev.2011.12.022.
- JESTROW, BRETT; RODRÍGUEZ, FRANCISCO JIMÉNEZ; FRANCISCO-ORTEGA, JAVIER (2010):**

**Generic Delimitation in the Antillean Adelleae (Euphorbiaceae) with Description of the Hispaniolan endemic Genus *Garciadelia*.**

In: *Taxon* 59 (6), p. 1801–1814. DOI: 10.1002/tax.596012.

**JORDAL, BJARTE H.; HEWITT, GODFREY M. (2004):**

**The Origin and Radiation of Macaronesian Beetles breeding in *Euphorbia*: the relative Importance of multiple Data Partitions and Population Sampling.**

In: *Systematic Biology* 53 (5), p. 711–734. DOI: 10.1080/10635150490468710.

**KAWAKITA, ATSUSHI; TAKIMURA, ATSUSHI; TERACHI, TORU; SOTA, TEIJI; KATO, MAKOTO (2004):**

**Cospeciation Analysis of an obligate Pollination Mutualism: Have Glochidion Trees (Euphorbiaceae) and Pollinating *Epicephala* Moths (Gracillariidae) diversified in parallel?**

In: *Evolution* 58 (10), p. 2201–2214. DOI: 10.1554/04-187.

**KULJU, KRISTO K.M.; HAM, RAYMOND W.J.M. VAN DER; BRETELER, FRANS J. (2008):**

**Rediscovery and phylogenetic Position of the incertae sedis Genus *Afrotrewia* (Euphorbiaceae): morphological, Pollen and molecular Evidence.**

In: *Taxon* 57 (1), p. 137–143. DOI: 10.6027/9789289333788-4-en.

**KULJU, KRISTO K.M.; SIERRA, SORAYA E.C.; DRAISMA, STEFANO G. A.; SAMUEL, ROSABELLE; VAN WELZEN, PETER C. (2007):**

**Molecular Phylogeny of *Macaranga*, *Mallotus*, and related Genera (Euphorbiaceae s.s.): Insights from Plastid and nuclear DNA Sequence Data.**

In: *American Journal of Botany* 94 (10), p. 1726–1743. DOI: 10.3732/ajb.94.10.1726.

**MELO, ANDRÉ LAURÉNIO; ESSER, HANS-JOACHIM; SALES, MARGARETH FERREIRA (2013):**

**New Combinations in *Pleradenophora* (Euphorbiaceae s.s.).**

In: *Phytotaxa* 81 (1). DOI: 10.11646/phytotaxa.81.1.10.

**ORBARD, DARREN J.; HARRIS, STEPHEN A.; BUGGS, RICHARD J. A.; PANNELL, JOHN R. (2006):**

**Hybridization, Polyploidy, and the Evolution of Sexual Systems in *Mercurialis* (Euphorbiaceae).**

In: *Evolution* 60 (9), p. 1801–1815. DOI: 10.1554/06-104.1.

**PEIRSON, JESS A.; BRUYNS, PETER V.; RIINA, RICARDA; MORAWETZ, JEFFERY J.; BERRY, PAUL E. (2013):**

**A molecular Phylogeny and Classification of the largely succulent and mainly African *Euphorbia* Subg. *Athymalus* (Euphorbiaceae).**

In: *Taxon* 62 (6), p. 1178–1199. DOI: 10.12705/626.12.

**PEIRSON, JESS A.; RIINA, RICARDA; MAYFIELD, MARK H.; FERGUSON, CAROLYN J.; URBATSCH, LOWELL E.; BERRY, PAUL E. (2014):**

**Phylogenetics and Taxonomy of the New World leafy Spurges, *Euphorbia* Section *Tithymalus* (Euphorbiaceae).**

In: *Botanical Journal of the Linnean Society* 175 (2), p. 191–228. DOI: 10.1111/boj.12167.

**RIINA, RICARDA; BERRY, PAUL E.; VAN EE, BENJAMIN W. (2009):**

**Molecular Phylogenetics of the Dragon's Blood *Croton* Section *Cyclostigma* (Euphorbiaceae): A polyphyletic Assemblage unraveled.**

In: *Systematic Botany* 34 (2), p. 360–374. DOI: 10.1600/036364409788606415.

**RIINA, RICARDA; PEIRSON, JESS A.; GELTMAN, DMITRY V.; MOLERO, JULIÁN; FRAJMAN, BOŽO; PAHLEVANI, AMIRHOSSEIN ET AL. (2013):**



- A worldwide molecular Phylogeny and Classification of the leafy Spurges, *Euphorbia* Subgenus *Esula* (Euphorbiaceae).**  
In: *Taxon* 62 (2), p. 316–342. DOI: 10.12705/622.3.
- RITZ, CHRISTINE M.; ZIMMERMANN, N. F. A.; HELLWIG, FRANK H. (2003):  
Phylogeny of subSect. *Meleuphorbia* (A. Berger) Pax & Hoffm. (*Euphorbia* L.) reflects the climatic regime in South Africa.**  
In: *Plant Systematics and Evolution* 241 (3-4), p. 245–259. DOI: 10.1007/s00606-003-0064-4.
- SIERRA, SORAYA E.C.; KULJU, KRISTO K.M.; FIŠER, ŽIVA; APARICIO, MARCELA; VAN WELZEN, PETER C. (2010):  
The Phylogeny of *Mallotus* s.str. (Euphorbiaceae) inferred from DNA Sequence and morphological Data.**  
In: *Taxon* 59 (1), p. 101–116. DOI: 10.1002/tax.591011.
- TOKUOKA, TORU (2007):  
Molecular phylogenetic Analysis of Euphorbiaceae sensu stricto based on Plastid and nuclear DNA Sequences and Ovule and Seed Character Evolution.**  
In: *Journal of Plant Research* 120 (4), p. 511–522. DOI: 10.1007/s10265-007-0090-3.
- TURNER, BILLIE L. (2011):  
Taxonomy of the papillose *Euphorbia* [*Tithymalus*] *longecornuta* complex (Euphorbiaceae) of northern Mexico.**  
In: *Phytoneuron* 14, p. 1–7.
- VAN EE, BENJAMIN W.; BERRY, PAUL E. (2009):  
A phylogenetic and taxonomic Review of *Croton* (Euphorbiaceae s.s.) on Jamaica including the Description of *Croton jamaicensis*, a new Species of Section *Eluteria*.**  
In: *Systematic Botany* 34 (1), p. 129–140. DOI: 10.1600/036364409787602203.
- VAN EE, BENJAMIN W.; BERRY, PAUL E. (2010):  
Taxonomy and Phylogeny of *Croton* Section *Heptallon* (Euphorbiaceae).**  
In: *Systematic Botany* 35 (1), p. 151–167. DOI: 10.1600/036364410790862461.
- VAN EE, BENJAMIN W.; BERRY, PAUL E. (2011):  
*Croton* Section *Pedicellati* (Euphorbiaceae), a novel New World Group, and a new Subsectional Classification of *Croton* Section *Lamprocroton*.**  
In: *Systematic Botany* 36 (1), p. 88–98. DOI: 10.1600/036364411X553162.
- VAN EE, BENJAMIN W.; FORSTER, PAUL I.; BERRY, PAUL E. (2015):  
Phylogenetic Relationships and a new Sectional Classification of *Croton* (Euphorbiaceae) in Australia.**  
In: *Australian Systematic Botany* 28 (4), p. 219–233. DOI: 10.1071/SB15016.
- VAN EE, BENJAMIN W.; RIINA, RICARDA; BERRY, PAUL E. (2011):  
A revised infrageneric Classification and molecular Phylogeny of New World *Croton* (Euphorbiaceae).**  
In: *Taxon* 60 (3), p. 791–823. DOI: 10.1002/tax.603013.
- VAN WELZEN, PETER C. (2010):  
Revision of the Asian Genus *Koilodepas* (Euphorbiaceae).**  
In: *Annals of the Missouri Botanical Garden* 97 (2), p. 218–234. DOI: 10.3417/2007149.
- WANG, SHUQIONG; CHEN, YUNYUN; YANG, YUCHEN; WU, WEI; LIU, YING; FAN, QIANG; ZHOU, REN-CHAO (2016):  
Phylogenetic Relationships and natural Hybridization in *Triadica* inferred from nuclear and Chloroplast DNA Analyses.**

In: *Biochemical Systematics and Ecology* 64, p. 142–148. DOI: 10.1016/j.bse.2015.11.011.

**WURDACK, KENNETH J.J.; HOFFMANN, PETRA; CHASE, MARK W. (2005):**

**Molecular phylogenetic Analysis of uniovulate Euphorbiaceae (Euphorbiaceae sensu stricto) using Plastid RBCL and TrnI-f DNA Sequences.**

In: *American Journal of Botany* 92 (8), p. 1397–1420. DOI: 10.3732/ajb.92.8.1397.

**YANG, YA; BERRY, PAUL E. (2011):**

**Phylogenetics of the *Chamaesyce* Clade (Euphorbia, Euphorbiaceae): reticulate Evolution and long-distance Dispersal in a prominent C4 Lineage.**

In: *American Journal of Botany* 98 (9), p. 1486–1503. DOI: 10.3732/ajb.1000496.

**YANG, YA; RIINA, RICARDA; MORAWETZ, JEFFERY J.; HAEVERMANS, THOMAS; AUBRIOT, XAVIER; BERRY, PAUL E. (2012):**

**Molecular Phylogenetics and Classification of *Euphorbia* Subgenus *Chamaesyce* (Euphorbiaceae).**

In: *Taxon* 61 (4), p. 764–789. DOI: 10.1002/tax.614005.

**ZAPATA, FELIPE; FINE, PAUL V. A. (2013):**

**Diversification of the Monoterpene Synthase Gene Family (TPSb) in *Protium*, a highly diverse Genus of tropical Trees.**

In: *Molecular Phylogenetics and Evolution* 68 (3), p. 432–442. DOI: 10.1016/j.ympev.2013.04.024.

**ZIMMERMANN, N. F. A.; RITZ, CHRISTIANE M.; HELLWIG, FRANK H. (2010):**

**Further support for the phylogenetic Relationships within *Euphorbia* L. (Euphorbiaceae) from nrITS and trnL–trnF Igs Sequence Data.**

In: *Plant Systematics and Evolution* 286 (1-2), p. 39–58. DOI: 10.1007/s00606-010-0272-7.

## Fabaceae

**ACHIMÓN, FERNANDA; JOHNSON, LEIGH A.; COCUCCI, ANDREA A.; SÉRSIC, ALICIA N.; BARANZELLI, MATIAS C. (2018):**

**Species Tree Phylogeny, Character Evolution, and Biogeography of the Patagonian Genus *Anarthrophyllum* Benth. (Fabaceae).**

In: *Organisms Diversity and Evolution* 18 (1), p. 71–86. DOI: 10.1007/s13127-017-0355-1.

**AÏNOUCHE, ABDELKADER; BAYER, RANDALL J. (1999):**

**Phylogenetic Relationships in *Lupinus* (Fabaceae: Papilionoideae) based on Internal Transcribed Spacer Sequences (ITS) of nuclear ribosomal DNA.**

In: *American Journal of Botany* 86 (4), p. 590–607. DOI: 10.2307/2656820.

**ALLAN, GERARD J.; FRANCISCO-ORTEGA, JAVIER; SANTOS-GUERRA, ARNOLDO; BOERNER, ERIN; ZIMMER, ELIZABETH A. (2004):**

**Molecular phylogenetic Evidence for the geographic Origin and Classification of Canary Island *Lotus* (Fabaceae: Loteae).**

In: *Molecular Phylogenetics and Evolution* 32 (1), p. 123–138. DOI: 10.1016/j.ympev.2003.11.018.

**ALLAN, GERARD J.; PORTER, J. MARK (2000):**

**Tribal Delimitation and phylogenetic Relationships of Loteae and Coronilleae (Faboideae: Fabaceae) with special Reference to *Lotus*: Evidence from nuclear ribosomal ITS Sequences.**

In: *American Journal of Botany* 87 (12), p. 1871–1881. DOI: 10.2307/2656839.

**AMIRAHMADI, ATEFE; KAZEMPOUR-OSALOO, SHAHROKH; KAVEH, AKRAM; MAASSOUMI, ALI AASGHAR; NADERI, REZA (2016):**

**The Phylogeny and new Classification of the Genus *Onobrychis* (Fabaceae-Hedysareae): Evidence from molecular Data.**

- In: *Plant Systematics and Evolution* 302 (10), p. 1445–1456. DOI: 10.1007/s00606-016-1343-1.
- AMIRAHMADI, ATEFE; KAZEMPOUR-OSALOO, SHAHROKH; MOEIN, FATEMEH; KAVEH, AKRAM; MAASSOUMI, ALI AASGHAR (2014):**  
**Molecular Systematics of the Tribe Hedysareae (Fabaceae) based on nrDNA ITS and Plastid trnL-F and matK Sequences.**  
In: *Plant Systematics and Evolution* 300 (4), p. 729–747. DOI: 10.1007/s00606-013-0916-5.
- ANOUCHE, A.; BAYER, RANDALL J.; MISSET, MARIE-THÉRÈSE (2004):**  
**Molecular Phylogeny, Diversification and Character Evolution in *Lupinus* (Fabaceae) with special Attention to Mediterranean and African Lupines.**  
In: *Plant Systematics and Evolution* 246 (3-4), p. 211–222. DOI: 10.1007/s00606-004-0149-8.
- ARAMBARRI, A. (2000):**  
**A Cladistic Analysis of the New World Species of *Lotus* L. (Fabaceae, Loteae).**  
In: *Cladistics* 16 (3), p. 283–297. DOI: 10.1006/clad.2000.0133.
- ASMUSSEN-LANGE, CONNY B.; LISTON, AARON (1998):**  
**Chloroplast DNA Characters, Phylogeny, and Classification of *Lathyrus* (Fabaceae).**  
In: *American Journal of Botany* 85 (3), p. 387–401. DOI: 10.2307/2446332.
- BAGHERI, ALI; MAASSOUMI, ALI AASGHAR; GHahremaninejad, FARROKH (2011):**  
**A taxonomic Revision of the Genus *Astragalus* L. (Fabaceae) in Zanjan Province, Iran and describing a new Species.**  
In: *Taxonomy and Biosystematics* 3 (8), p. 7–16.
- BANKS, HANNAH I.; FOREST, FÉLIX; LEWIS, GWILYM PETER (2014):**  
**Evolution and Diversity of Pollen Morphology in Tribe Cercideae (Leguminosae).**  
In: *Taxon* 63 (2), p. 299–314. DOI: 10.12705/632.37.
- BARTHA, LÁSZLÓ; DRAGOŞ, NICOLAE; MOLNÁR V., ATTILA; SRAMKÓ, GÁBOR (2013):**  
**Molecular Evidence for reticulate Speciation in *Astragalus* (Fabaceae) as revealed by a Case Study from Sect. *Dissitiflora*.**  
In: *Botany* 91 (10), p. 702–714. DOI: 10.1139/cjb-2013-0036.
- BENA, G.; PROSPERI, J. M.; LEJEUNE, BERNARD; OLIVIERI, ISABELLE (1998):**  
**Evolution of annual Species of the Genus *Medicago*: a molecular phylogenetic Approach.**  
In: *Molecular Phylogenetics and Evolution* 9 (3), p. 552–559. DOI: 10.1006/mpev.1998.0493.
- BESSEGA, C.; FORTUNATO, RENÉ H. (2011):**  
**Section *Mimadenia*: its phylogenetic Relationships within the Genus *Mimosa* (Leguminosae, Mimosoideae) using Plastid trnL-F Sequence Data.**  
In: *Australian Systematic Botany* 24 (2), p. 104–110. DOI: 10.1071/SB10022.
- BESSEGA, C.; HOPP, H. E.; FORTUNATO, RENÉ H. (2008):**  
**Toward a Phylogeny of *Mimosa* (Leguminosae: Mimosoideae): A preliminary Analysis of Southern South American Species based on Chloroplast DNA Sequence.**  
In: *Annals of the Missouri Botanical Garden* 95 (4), p. 567–579. DOI: 10.3417/2006012.
- BOATWRIGHT, J. S.; TILNEY, PATRICIA M.; VAN WYK, BEN-ERIK (2008):**  
**A taxonomic Revision of the Genus *Rothia* (Crotalariaeae, Fabaceae).**  
In: *Australian Systematic Botany* 21 (6), p. 422–430. DOI: 10.1071/SB08033.
- BOATWRIGHT, JAMES S.; LE ROUX, MARIANNE M.; WINK, MICHAEL; MOROZOVA, TATJANA; VAN WYK, BEN-ERIK (2008):**

**Phylogenetic Relationships of Tribe Crotalariaeae (Fabaceae) inferred from DNA Sequences and Morphology.**

In: Systematic Botany 33 (4), p. 752–761. DOI: 10.1600/036364408786500271.

**BOATWRIGHT, JAMES S.; MAURIN, OLIVIER; VAN DER BANK, MICHELLE (2015):**

**Phylogenetic Position of Madagascan Species of *Acacia* s.l. and new Combinations in *Senegalia* and *Vachellia* (Fabaceae, Mimosoideae, Acacieae).**

In: Botanical Journal of the Linnean Society 179 (2), p. 288–294. DOI: 10.1111/boj.12320.

**BOATWRIGHT, JAMES S.; SAVOLAINEN, VINCENT; VAN WYK, BEN-ERIK; LISE SCHUTTE-VLOK, ANNE; FOREST, FÉLIX; VAN DER BANK, MICHELLE (2008):**

**Systematic Position of the Anomalous Genus *Cadia* and the Phylogeny of the Tribe Podalyrieae (Fabaceae).**

In: Systematic Botany 33 (1), p. 133–147. DOI: 10.1600/036364408783887500.

**BOATWRIGHT, JAMES S.; WINK, MICHAEL; VAN WYK, BEN-ERIK (2011):**

**The generic Concept of *Lotononis* (Crotalariaeae, Fabaceae): Reinstatement of the Genera *Euchlora*, *Leobordea* and *Listia* and the new Genus *Ezoloba*.**

In: Taxon 60 (1), p. 161–177. DOI: 10.1002/tax.601014.

**BOGDANOVIĆ, SANDRO; BRULLO, CRISTIAN; BRULLO, SALVATORE; LJUBIČIĆ, IVICA; GIUSSO DEL GALDO, GIANPIETRO (2016):**

***Bituminaria plumosa* (Fabaceae), a critical Species of the Croatian Flora.**

In: Plant Ecology and Evolution 149 (3), p. 347–355. DOI: 10.5091/plecevo.2016.1211.

**BORGES, LEONARDO MAURICI; SIMON, MARCELO FRAGOMENI; PIRANI, JOSÉ RUBENS (2017):**

**Less is more. Adjusting the Taxonomy of the polytypic *Mimosa setosa* (Leguminosae, Mimosoid).**

In: Rodriguésia 68 (2), p. 515–540. DOI: 10.1590/2175-7860201768215.

**BOUCHENAK-KHELLADI, YANIS; MAURIN, OLIVIER; HURTER, JOHAN; VAN DER BANK, MICHELLE (2010):**

**The evolutionary History and Biogeography of Mimosoideae (Leguminosae): an Emphasis on African Acacias.**

In: Molecular Phylogenetics and Evolution 57 (2), p. 495–508. DOI: 10.1016/j.ympev.2010.07.019.

**BROUAT, CARINE; GIELLY, LUDOVIC; MCKEY, DOYLE (2001):**

**Phylogenetic Relationships in the Genus *Leonardoxa* (Leguminosae: Caesalpinioideae) inferred from Chloroplast trnL Intron and trnL-trnF intergenic spacer Sequences.**

In: American Journal of Botany 88 (1), p. 143–149. DOI: 10.2307/2657134.

**BROWN, ANTHONY H.D.; GRACE, J. P.; DOYLE, J. J. (2002):**

**Molecular phylogenetic Relationships within and among diploid Races of *Glycine tomentella* (Leguminosae).**

In: Australian Systematic Botany 15 (1), p. 37–47. DOI: 10.1071/SB01003.

**BROWN, GILLIAN K.; ARIATI, SITI R.; MURPHY, DANIEL J.; MILLER, JOSEPH T.H.; LADIGES, PAULINE Y. (2006):**

**Bipinnate Acacias (*Acacia* Subg. *Phyllodineae* Sect. *Botrycephalae*) of eastern Australia are polyphyletic based on DNA Sequence Data.**

In: Australian Systematic Botany 19 (4), p. 315–326. DOI: 10.1071/SB05039.

**BROWN, GILLIAN K.; CLOWES, CATHERINE; MURPHY, DANIEL J.; LADIGES, PAULINE Y. (2010):**

**Phylogenetic Analysis based on nuclear DNA and Morphology defines a Clade of eastern Australian Species of *Acacia* s.s. (section *Juliflorae*): the '*Acacia longifolia* Group'.**

In: Australian Systematic Botany 23 (3), p. 162–172. DOI: 10.1071/SB09037.

**BROWN, GILLIAN K.; MURPHY, DANIEL J.; KIDMAN, JAMES; LADIGES, PAULINE Y. (2012):**

**Phylogenetic connections of phyllodinous Species of *Acacia* outside Australia are explained by geological History and human-mediated Dispersal.**

In: Australian Systematic Botany 25 (6), p. 390–403. DOI: 10.1071/SB12027.

**BROWN, GILLIAN K.; MURPHY, DANIEL J.; LADIGES, PAULINE Y. (2011):**

**Relationships of the Australo-Malesian Genus *Paraserianthes* (Mimosoideae: Leguminosae) identifies the Sister Group of *Acacia* sensu stricto and two biogeographical Tracks.**

In: Cladistics 27 (4), p. 380–390. DOI: 10.1111/j.1096-0031.2011.00349.x.

**BROWN, GILLIAN K.; MURPHY, DANIEL J.; MILLER, JOSEPH T.H.; LADIGES, PAULINE Y. (2008):**

***Acacia* s.s. and its Relationship among tropical Legumes, Tribe Ingeae (Leguminosae: Mimosoideae).**

In: Systematic Botany 33 (4), p. 739–751. DOI: 10.1600/036364408786500136.

**BRULLO, SALVATORE; BRULLO, CRISTIAN; MINISSALE, PIETRO; SALMERI, CRISTINA; GALDO, GIANPIETRO GIUSSO DEL (2016):**

**Taxonomic Investigations on *Psoralea palaestina* (Fabaceae), a critical Species of Mediterranean Flora.**

In: Phytotaxa 266 (2), p. 61. DOI: 10.11646/phytotaxa.266.2.1.

**BRUNEAU, ANNE; FOREST, FÉLIX; HERENDEEN, PATRICK S.; KLITGAARD, BENTE B.; LEWIS, GWILYM PETER (2001):**

**Phylogenetic Relationships in the Caesalpinioideae (Leguminosae) as inferred from Chloroplast trnL Intron Sequences.**

In: Systematic Botany 26 (3), p. 487–514.

**BRUNEAU, ANNE; KLITGAARD, BENTE B.; PRENNER, GERHARD; FOUGÈRE-DANEZAN, MARIE; TUCKER, SHIRLEY C. (2014):**

**Floral Evolution in the Detarieae (Leguminosae): phylogenetic Evidence for labile Floral Development in an early-diverging Legume Lineage.**

In: International Journal of Plant Sciences 175 (4), p. 392–417. DOI: 10.1086/675574.

**BRUNEAU, ANNE; MERCURE, MARJORIE; LEWIS, GWILYM PETER; HERENDEEN, PATRICK P. (2008):**

**Phylogenetic Patterns and Diversification in the Caesalpinioid Legumes.**

In: Botany 86 (7), p. 697–718. DOI: 10.1139/B08-058.

**BURGHARDT, ALICIA D.; ESPERT, SHIRLEY M. (2007):**

**Phylogeny of *Prosopis* (Leguminosae) as shown by morphological and biochemical Evidence.**

In: Australian Systematic Botany 20 (4), p. 332–339. DOI: 10.1071/SB06043.

**CAMARGO, RODRIGO AUGUSTO; AZEVEDO TOZZI, ANA MARIA GOULART (2014):**

**A Synopsis of the Genus *Deguelia* (Leguminosae, Papilionoideae, Millettieae) in Brazil.**

In: Brittonia 66 (1), p. 12–32. DOI: 10.1007/s12228-013-9302-4.

**CAMARGO, RODRIGO AUGUSTO; TOZZI, ANA MARIA GOULART DE AZEVEDO (2016):**

**Taxonomic Placement of *Millettia occidentalis* (Leguminosae, Papilionoideae), a rare Liana from the Amazon Basin.**

In: Phytotaxa 261 (1), p. 75. DOI: 10.11646/phytotaxa.261.1.3.

CARDOSO, DOMINGOS; HARRIS, DAVID J.; WIERINGA, JAN J.; SÃO-MATEUS, WALLACE M. B.; BATALHA-FILHO, HENRIQUE; TORKE, BENJAMIN M. ET AL. (2017):

**A molecular-dated Phylogeny and Biogeography of the monotypic Legume Genus *Haplormosia*, a missing African branch of the otherwise American-Australian Brongniartieae Clade.**

In: Molecular Phylogenetics and Evolution 107, p. 431–442. DOI: 10.1016/j.ympev.2016.12.012.

CARDOSO, DOMINGOS; LIMA, HAROLDO CAVALCANTE DE; RODRIGUES, RODRIGO SCHÜTZ; QUEIROZ, LUCIANO PAGANUCCI; PENNINGTON, R. TOBY; LAVIN, MATT (2012):

**The *Bowdichia* Clade of Genistoid Legumes: phylogenetic Analysis of combined molecular and morphological Data and a recircumscription of *Diplotropis*.**

In: Taxon 61 (5), p. 1074–1087.

CARDOSO, DOMINGOS; PAGANUCCI DE QUEIROZ, LUCIANO; CAVALCANTE DE LIMA, HAROLDO; SUGANUMA, ELISA; VAN DEN BERG, CÁSSIO; LAVIN, MATT (2013):

**A molecular Phylogeny of the vataireoid Legumes underscores Floral evolvability that is General to many early-branching Papilionoid Lineages.**

In: American Journal of Botany 100 (2), p. 403–421. DOI: 10.3732/ajb.1200276.

CARDOSO, DOMINGOS; QUEIROZ, LUCIANO PAGANUCCI; PENNINGTON, R. TOBY; LIMA, HAROLDO CAVALCANTE DE; FONTY, EMILE; WOJCIECHOWSKI, MARTIN F.; LAVIN, MATT (2012):

**Revisiting the Phylogeny of papilionoid Legumes: new Insights from comprehensively sampled early-branching Lineages.**

In: American Journal of Botany 99 (12), p. 1991–2013. DOI: 10.3732/ajb.1200380.

CARDOSO, DOMINGOS; SÃO-MATEUS, WALLACE M. B.; DA CRUZ, DAIANE TRABUCO; ZARTMAN, CHARLES E.; KOMURA, DIRCE L.; KITE, GEOFFREY C. ET AL. (2015):

**Filling in the gaps of the papilionoid Legume Phylogeny: the enigmatic Amazonian Genus *Petaladenium* is a new Branch of the early-diverging Amburaneae Clade.**

In: Molecular Phylogenetics and Evolution 84, p. 112–124. DOI: 10.1016/j.ympev.2014.12.015.

CASIMIRO-SORIGUER, RAMÓN; TALAVERA, MARÍA; BALAO, FRANCISCO; TERRAB, ANASS; HERRERA, JAVIER; TALAVERA, SALVADOR (2010):

**Phylogeny and genetic Structure of *Erophaca* (Leguminosae), a East-West Mediterranean disjunct Genus from the Tertiary.**

In: Molecular Phylogenetics and Evolution 56 (1), p. 441–450. DOI: 10.1016/j.ympev.2010.02.025.

CASTRO, OLGA; COZZOLINO, SALVATORE; JURY, P. L.; CAPUTO, P. (2002):

**Molecular Relationships in *Genista* L. Sect. *Spartocarpus* Spach (Fabaceae).**

In: Plant Systematics and Evolution 231 (1-4), p. 91–108. DOI: 10.1007/s006060200013.

CEOLIN, GUILHERME B.; MIOTTO, SILVIA T. P. (2012):

**Combining ecological and morphometrical Approaches to increase the Resolution within the *Galactia neesii* (Leguminosae) Complex.**

In: Plant Systematics and Evolution 298 (3), p. 645–652. DOI: 10.1007/s00606-011-0573-5.

CHANDLER, GREGORY T.; BAYER, RANDALL J.; CRISP, MICHAEL D. (2001):

**A molecular Phylogeny of the endemic Australian Genus *Gastrolobium* (Fabaceae: Mirbelieae) and allied Genera using Chloroplast and nuclear Markers.**

In: American Journal of Botany 88 (9), p. 1675–1687. DOI: 10.2307/3558413.

CHANDLER, GREGORY T.; BAYER, RANDALL J.; GILMORE, SIMON R. (2003):

- Oxylobium/Gastrolobium* (Fabaceae : Mirbelieae) Conundrum: further Studies using molecular Data and a reappraisal of morphological Characters.**  
In: Plant Species Biology 18 (2-3), p. 91–101. DOI: 10.1111/j.1442-1984.2003.00094.x.
- CHAPPILL, JENNIFER A.; WILKINS, CAROLYN F.; CRISP, MICHAEL D. (2008):  
Taxonomic Revision of *Gompholobium* (Leguminosae: Mirbelieae).**  
In: Australian Systematic Botany 21 (2), p. 67–151. DOI: 10.1071/SB07030.
- CHAPPILL, JENNIFER A.; WILKINS, CAROLYN F.; CRISP, MICHAEL D. (2007):  
Taxonomic Revision of *Jacksonia* (Leguminosae: Mirbelieae).**  
In: Australian Systematic Botany 20 (6), p. 473–623. DOI: 10.1071/SB06047.
- CHAUDHARY, LAL BABU; RANA, TIKAM SINGH; ANAND, KUMAR KAMAL (2008):  
Current Status of the Systematics of *Astragalus* L. (Fabaceae) with special Reference to the Himalayan Species in India.**  
In: Taiwaniana 55 (4), p. 338–355.
- CHENNAOUI-KOURDA, HOUDA; MARGHALI, SONIA; ZITOUNA, NADIA; TRIFI-FARAH, NEILA (2012):  
Phylogenetic Relationships of Mediterranean *Hedysarea* Species assessed by AFLP Markers.**  
In: Plant Systematics and Evolution 298 (1), p. 51–58. DOI: 10.1007/s00606-011-0522-3.
- CHOI, BYOUNG-HEE; SEOK, DONG-IM; ENDO, YASUHIKO; OHASHI, HIROYOSHI (2006):  
Phylogenetic Significance of styler Features in Genus *Vicia* (Leguminosae): an Analysis with molecular Phylogeny.**  
In: Journal of Plant Research 119 (5), p. 513–523. DOI: 10.1007/s10265-006-0015-6.
- CRISP, MICHAEL D.; APPELS, R.; SMITH, F. M.; KEYS, W. M. P. (1999):  
Phylogenetic Evaluation of 5s ribosomal RNA Gene and Spacer in the *Callistachys* Group (Fabaceae: Mirbelieae).**  
In: Plant Systematics and Evolution 218 (1-2), p. 33–42. DOI: 10.1007/BF01087032.
- CRISP, MICHAEL D.; CAYZER, LINDY; CHANDLER, GREGORY T.; COOK, LYN G. (2017):  
A monograph of *Daviesia* (Mirbelieae, Faboideae, Fabaceae).**  
In: Phytotaxa 300 (1), p. 1. DOI: 10.11646/phytotaxa.300.1.1.
- CRISP, MICHAEL D.; COOK, LYN G. (2003):  
Phylogeny and Evolution of anomalous Roots in *Daviesia* (Fabaceae: Mirbelieae).**  
In: International Journal of Plant Sciences 164 (4), p. 603–612.
- CUBAS, PALOMA; PARDO, CRISTINA; TAHIRI, HIKMAT (2002):  
Molecular approach to the Phylogeny and Systematics of *Cytisus* Leguminosae) and related Genera based on nucleotide Sequences of nrDNA (ITS Region) and cpDNA (trnL-trnF intergenic spacer).**  
In: Plant Systematics and Evolution 233 (3), p. 223–242. DOI: 10.1007/s00606-002-0194-0.
- CUBAS, PALOMA; PARDO, CRISTINA; TAHIRI, HIKMAT (2006):  
Morphological convergence or Lineage Sorting? The case of *Cytisus purgans* auct. (Leguminosae).**  
In: Taxon 55 (3), p. 695–704. DOI: 10.2307/25065645.
- CUBAS, PALOMA; PARDO, CRISTINA; TAHIRI, HIKMAT; CASTROVIEJO, SANTIAGO (2010):  
Phylogeny and evolutionary Diversification of *Adenocarpus* DC. (Leguminosae).**  
In: Taxon 59 (3), p. 720–732.
- DA SILVA, MARCOS JOSÉ; AZEVEDO TOZZI, ANA MARIA GOULART (2012):**

**Three new species, a new Combination, and a neotypification in *Dahlstedtia* (Leguminosae, Millettieae, Papilionoideae) from South America.**

In: *Brittonia* 64 (3), p. 268–276. DOI: 10.1007/s12228-012-9242-4.

DA SILVA, MARCOS JOSÉ; QUEIROZ, LUCIANO PAGANUCCI; TOZZI, ANA MARIA GOULART DE AZEVEDO; LEWIS, GWILYM PETER; SOUSA, ANETE PEREIRA DE (2012):

**Phylogeny and Biogeography of *Lonchocarpus* sensu lato and its Allies in the Tribe Millettieae (Leguminosae, Papilionoideae).**

In: *Taxon* 61 (1), p. 93–108. DOI: 10.1002/tax.611007.

DASTPAK, AREZOO; KAZEMPOUR-OSALOO, SHAHROKH; MAASSOUMI, ALI AASGHAR; AMIRAHMADI, ATEFE (2013):

**Phylogenetic Analysis of *Astragalus* Sect. *Ammodendron* (Fabaceae) based on nrDNA ITS and two cpDNAs, psbA-trnH and trnT-trnY Sequences.**

In: *Biochemical Systematics and Ecology* 50, p. 459–466. DOI: 10.1016/j.bse.2013.06.008.

DEGTJAREVA, GALINA V.; KRAMINA, TATIANA E.; SOKOLOFF, DMITRY D.; SAMIGULLIN, TAHIR H.; VALIEJO-ROMAN, CARMEN M.; ANTONOV, A. P. (2006):

**Phylogeny of the Genus *Lotus* (Leguminosae, Loteae): Evidence from nrITS Sequences and Morphology.**

In: *Canadian Journal of Botany* 84 (5), p. 813–830. DOI: 10.1139/B06-035.

DEGTJAREVA, GALINA V.; VALIEJO-ROMAN, CARMEN M.; SAMIGULLIN, TAHIR H.; GUARA-REQUENA, MIGUEL; SOKOLOFF, DMITRY D. (2012):

**Phylogenetics of *Anthyllis* (Leguminosae: Papilionoideae: Loteae): Partial Incongruence between nuclear and Plastid Markers, a long Branch Problem and Implications for morphological Evolution.**

In: *Molecular Phylogenetics and Evolution* 62 (2), p. 693–707. DOI: 10.1016/j.ympev.2011.11.010.

DELGADO-SALINAS, ALFONSO; BIBLER, RYAN; LAVIN, MATT (2006):

**Phylogeny of the Genus *Phaseolus* (Leguminosae): A Recent Diversification in an ancient Landscape.**

In: *Systematic Botany* 31 (4), p. 779–791.

DIZKIRICI, AYTEN; EKICI, MURAT; KAYA, ZEKI (2014):

**Comparative molecular Phylogenetics of *Astragalus* L. Sections from Turkey with New World *Astragalus* Species using nrDNA ITS Sequences.**

In: *Plant Systematics and Evolution* 300 (1), p. 163–175. DOI: 10.1007/s00606-013-0868-9.

DONKPEGAN, ARMEL P. L.; DOUCET, JEAN-LOUIS; MIGLIORE, JÉRÉMY; DUMINIL, JÉRÔME; DAÏNOU, KASSO; PIÑEIRO, ROSALÍA ET AL. (2017):

**Evolution in African tropical Trees displaying Ploidy-habitat Association: the Genus *Afzelia* (Leguminosae).**

In: *Molecular Phylogenetics and Evolution* 107, p. 270–281. DOI: 10.1016/j.ympev.2016.11.004.

DRUMMOND, CHRISTOPHER P. (2008):

**Diversification of *Lupinus* (Leguminosae) in the western New World: derived Evolution of perennial life History and Colonization of montane Habitats.**

In: *Molecular Phylogenetics and Evolution* 48 (2), p. 408–421. DOI: 10.1016/j.ympev.2008.03.009.

DRUMMOND, CHRISTOPHER S.; EASTWOOD, RUTH J.; MIOTTO, SILVIA T. S.; HUGHES, COLIN E. (2012):

**Multiple continental Radiations and correlates of Diversification in *Lupinus* (Leguminosae): testing for Key Innovation with incomplete Taxon Sampling.**

In: *Systematic Biology* 61 (3), p. 443–460. DOI: 10.1093/sysbio/syr126.

DUAN, LEI; WEN, JUN; YANG, XUE; LIU, PEI-LIANG; ARSLAN, EMINE; ERTUĞRUL, KUDDISI; CHANG, ZHAO-YANG (2015):



**Phylogeny of *Hedysarum* and Tribe Hedysareae (Leguminosae: Papilionoideae) inferred from Sequence Data of ITS, matK, trnL-F and psbA-trnH.**

In: Taxon 64 (1), p. 49–64. DOI: 10.12705/641.26.

**DUAN, LEI; YANG, XUE; LIU, PEI-LIANG; JOHNSON, GABRIEL; WEN, JUN; CHANG, ZHAO-YANG (2016):**

**A molecular Phylogeny of Caraganeae (Leguminosae, Papilionoideae) reveals Insights into new generic and infrageneric Delimitations.**

In: PhytoKeys (70), p. 111–137. DOI: 10.3897/phytokeys.70.9641.

**DUMINIL, JÉRÔME; BROWN, RICHARD P.; EWÉDJÈ, EBEN-EZER B. K.; MARDULYN, PATRICK; DOUCET, JEAN-LOUIS; HARDY, OLIVIER J. (2013):**

**Large-scale Pattern of genetic differentiation within African Rainforest Trees: Insights on the Roles of ecological Gradients and past Climate Changes on the Evolution of *Erythrophleum* spp (Fabaceae).**

In: BMC Evolutionary Biology 13, p. 195. DOI: 10.1186/1471-2148-13-195.

**EDWARDS, DAWN; HAWKINS, JULIE A. (2007):**

**Are Cape Floral Clades the same age? Contemporaneous Origins of two Lineages in the Genistoids s.l. (Fabaceae).**

In: Molecular Phylogenetics and Evolution 45 (3), p. 952–970. DOI: 10.1016/j.ympev.2007.09.014.

**EDWARDS, DAWN; HORN, ANNE; TAYLOR, DIANE; SAVOLAINEN, VINCENT; HAWKINS, JULIE A. (2008):**

**DNA barcoding of a large Genus, *Aspalathus* L. (Fabaceae).**

In: Taxon 57 (4), p. 1317–1327. DOI: 10.1002/tax.574021.

**EGAN, ASHLEY N.; CRANDALL, KEITH A. (2008):**

**Incorporating gaps as phylogenetic Characters across eight DNA Regions: Ramifications for North American Psoraleeae (Leguminosae).**

In: Molecular Phylogenetics and Evolution 46 (2), p. 532–546. DOI: 10.1016/j.ympev.2007.10.006.

**EGAN, ASHLEY N.; VATANPARAST, MOHAMMAD; CAGLE, WILLIAM (2016):**

**Parsing polyphyletic *Pueraria*: Delimiting distinct evolutionary Lineages through Phylogeny.**

In: Molecular Phylogenetics and Evolution 104, p. 44–59. DOI: 10.1016/j.ympev.2016.08.001.

**EKICI, MURAT; AKAN, HASAN; AYTAÇ, ZEKI (2015):**

**Taxonomic Revision of *Astragalus* L. Section *Onobrychoidei* DC. (Fabaceae) in Turkey.**

In: Turkish Journal of Botany 39, p. 708–745. DOI: 10.3906/bot-1405-41.

**ELLISON, NICK W.; LISTON, AARON; STEINER, JEFFREY J.; WILLIAMS, WARREN M.; TAYLOR, NORMAN L. (2006):**

**Molecular Phylogenetics of the clover Genus (*Trifolium* - Leguminosae).**

In: Molecular Phylogenetics and Evolution 39 (3), p. 688–705. DOI: 10.1016/j.ympev.2006.01.004.

**ENDO, YASUHIKO; CHOI, BYOUNG-HEE; OHASHI, HIROYOSHI; DELGADO-SALINAS, ALFONSO (2008):**

**Phylogenetic Relationships of New World *Vicia* (Leguminosae) inferred from nrDNA Internal Transcribed Spacer Sequences and Floral Characters.**

In: Systematic Botany 33 (2), p. 356–363. DOI: 10.1600/036364408784571536.

**ERKUL, SEHER KARAMAN; AYTAÇ, ZEKI (2013):**

**The Revision of the Genus *Oxytropis* (Leguminosae) in Turkey.**

In: Turkish Journal of Botany 37, p. 24–38.

**ESPERT, SHIRLEY M.; DREWES, SUSANA I.; BURGHARDT, ALICIA D. (2007):**

**Phylogeny of *Macroptilium* (Leguminosae): morphological, biochemical and molecular Evidence.**

- In: *Cladistics* 23 (2), p. 119–129. DOI: 10.1111/j.1096-0031.2006.00140.x.
- FORTUNA-PEREZ, ANA PAULA; DA SILVA, MARCOS JOSÉ; QUEIROZ, LUCIANO PAGANUCCI; LEWIS, GWILYM PETER; SIMÕES, ANDRÉ OLMO; AZEVEDO TOZZI, ANA MARIA GOULART ET AL. (2013):**  
**Phylogeny and Biogeography of the Genus *Zornia* (Leguminosae: Papilionoideae: Dalbergieae).**  
In: *Taxon* 62 (4), p. 723–732. DOI: 10.12705/624.35.
- FOUGÈRE-DANEZAN, MARIE; HERENDEEN, PATRICK S.; MAUMONT, STÉPHAN; BRUNEAU, ANNE (2010):**  
**Morphological Evolution in the variable resin-producing Detarieae (Fabaceae): do morphological Characters retain a phylogenetic Signal?**  
In: *Annals of Botany* 105 (2), p. 311–325. DOI: 10.1093/aob/mcp280.
- FOUGÈRE-DANEZAN, MARIE; MAUMONT, STÉPHAN; BRUNEAU, ANNE (2007):**  
**Relationships among Resin-Producing Detarieae s.l. (Leguminosae) as inferred by molecular Data.**  
In: *Systematic Botany* 32 (4), p. 748–761.
- FRIEND, P. A.; QUANDT, DIETMAR; TALLURY, P. P.; STALKER, H. T.; HILU, KHIDIR W. (2010):**  
**Species, Genomes, and Section Relationships in the Genus *Arachis* (Fabaceae): a molecular Phylogeny.**  
In: *Plant Systematics and Evolution* 290 (1-4), p. 185–199. DOI: 10.1007/s00606-010-0360-8.
- FRITSCH, PETER W.; CRUZ, BONI C. (2012):**  
**Phylogeny of *Cercis* based on DNA Sequences of nuclear ITS and four Plastid Regions: Implications for transatlantic historical Biogeography.**  
In: *Molecular Phylogenetics and Evolution* 62 (3), p. 816–825. DOI: 10.1016/j.ympev.2011.11.016.
- GAGNON, EDELINE; HUGHES, COLIN E.; LEWIS, GWILYM PETER; BRUNEAU, ANNE (2015):**  
**A new cryptic Species in a new cryptic Genus in the *Caesalpinia* Group (Leguminosae) from the seasonally dry inter-Andean valleys of South America.**  
In: *Taxon* 64 (3), p. 468–490. DOI: 10.12705/643.6.
- GAGNON, EDELINE; LEWIS, GWILYM PETER; SOLANGE SOTUYO, J.; HUGHES, COLIN E.; BRUNEAU, ANNE (2013):**  
**A molecular Phylogeny of *Caesalpinia* sensu lato: Increased Sampling reveals new Insights and more Genera than expected.**  
In: *South African Journal of Botany* 89, p. 111–127. DOI: 10.1016/j.sajb.2013.07.027.
- GERVAIS, G. Y. F.; BRUNEAU, ANNE (2002):**  
**Phylogenetic Analysis of a polyphyletic African Genus of Caesalpinioideae (Leguminosae): *Monopetalanthus* Harms.**  
In: *Plant Systematics and Evolution* 235 (1), p. 19–34. DOI: 10.1007/s00606-002-0222-0.
- GOVINDARAJULU, RAJANIKANTH; HUGHES, COLIN E.; BAILEY, C. DONOVAN (2011):**  
**Phylogenetic and population genetic Analyses of diploid *Leucaena* (Leguminosae; Mimosoideae) reveal cryptic Species Diversity and Patterns of divergent allopatric speciation.**  
In: *American Journal of Botany* 98 (12), p. 2049–2063. DOI: 10.3732/ajb.1100259.
- GROUP, THE LEGUME PHYLOGENY WORKING (2013):**  
**Legume Phylogeny and Classification in the 21st century: Progress, Prospects and Lessons for other species-rich Clades.**  
In: *Taxon* 62 (2), p. 217–248. DOI: 10.12705/622.8.
- HAN, JEONG EUN; CHUNG, KOOK-HYUN; NEMOTO, TOMOYUKI; CHOI, BYOUNG-HEE (2010):**

**Phylogenetic Analysis of eastern Asian and eastern North American disjunct *Lespedeza* (Fabaceae) inferred from nuclear ribosomal ITS and Plastid Region Sequences.**

In: Botanical Journal of the Linnean Society 164 (3), p. 221–235. DOI: 10.1111/j.1095-8339.2010.01084.x.

**HARDION, LAURENT; BAUMEL, ALEX; DUMAS, PIERRE-JEAN; DUONG, NATHALIE; AFFRE, LAURENCE; TATONI, THIERRY (2010):**

**Phylogenetic Relationships and infrageneric Classification of *Astragalus tragacantha* L. (Fabaceae), inferred from nuclear ribosomal DNA Internal transcribed Spacers Data (nrDNA ITS).**

In: Ecologia Mediterranea 36 (1), p. 99–106.

**HASTON, ELSPETH M.; LEWIS, GWILYM PETER; HAWKINS, JULIE A. (2005):**

**A phylogenetic reappraisal of the *Peltophorum* Group (Caesalpinieae: Leguminosae) based on the Chloroplast trnL-F, rbcL and rps16 Sequence Data.**

In: American Journal of Botany 92 (8), p. 1359–1371. DOI: 10.3732/ajb.92.8.1359.

**HOU, XIN; LIU, JUN-E; ZHAO, YI-ZHI (2008):**

**Molecular Phylogeny of *Caragana* (Fabaceae) in China.**

In: Journal of Systematics and Evolution 46 (4), p. 600–607.

**HU, JER-MING; LAVIN, MATT; WOJCIECHOWSKI, MARTIN F.; SANDERSON, MICHAEL J. (2002):**

**Phylogenetic Analysis of Nuclear Ribosomal ITS/5.8S Sequences in the Tribe Millettieae (Fabaceae): *Poecilanthe-Cyclolobium*, the Core Millettieae, and the *Callerya* Group.**

In: Systematic Botany 27 (4), p. 722–733.

**HU, JER-MING; LAVIN, MATT; WOJCIECHOWSKI, MARTIN F.; SANDERSON, MICHAEL J. (2000):**

**Phylogenetic Systematics of the Tribe Millettieae (Leguminosae) based on Chloroplast trnK/matK Sequences and its Implications for evolutionary Patterns in Papilionoideae.**

In: American Journal of Botany 87 (3), p. 418–430. DOI: 10.2307/2656638.

**IGANCI, JOÃO R. V.; SOARES, MARCOS V.; GUERRA, ETHIÉNE; MORIM, MARLI P. (2016):**

**A Preliminary molecular Phylogeny of the *Abarema* Alliance (Leguminosae) and Implications for taxonomic Rearrangement.**

In: International Journal of Plant Sciences 177 (1), p. 34–43. DOI: 10.1086/684078.

**IRELAND, HELEN E.; KITE, GEOFFREY C.; VEITCH, NIGEL C.; CHASE, MARK W.; SCHRIRE, BRIAN D.; LAVIN, MATT ET AL. (2010):**

**Biogeographical, ecological and morphological Structure in a phylogenetic Analysis of *Ateleia* (Swartzieae, Fabaceae) derived from combined molecular, morphological and chemical Data.**

In: Botanical Journal of the Linnean Society 162, p. 39–53.

**JAASKA, VELLO (2005):**

**Isozyme Variation and phylogenetic Relationships in *Vicia* Subgenus *Cracca* (Fabaceae).**

In: Annals of Botany 96 (6), p. 1085–1096. DOI: 10.1093/aob/mci260.

**JAASKA, VELLO (2015):**

**Phylogenetic Relationships among Sections *Vicia*, *Sepium* and *Lathyroides* of *Vicia* Subgenus *Vicia*: isozyme Evidence.**

In: Biochemical Systematics and Ecology 62, p. 186–193. DOI: 10.1016/j.bse.2015.08.002.

- JALILIAN, N.; RAHIMINEJAD, MOHAMMAD REZA; MAASSOUMI, ALI AASGHAR; MAROOFI, HOSEIN (2014):**  
**Taxonomic Revision of the Genus *Vicia* L. (Fabaceae) in Iran.**  
 In: Iranian Journal of Botany 20 (2), p. 155–164.
- JAVADI, FIROUZEH; TUN, YE TUN; KAWASE, MAKOTO; GUAN, KAIYUN; YAMAGUCHI, HIROFUMI (2011):**  
**Molecular Phylogeny of the Subgenus *Ceratotropis* (genus *Vigna*, Leguminosae) reveals three eco-geographical Groups and Late Pliocene-Pleistocene Diversification: Evidence from four Plastid DNA Region Sequences.**  
 In: Annals of Botany 108 (2), p. 367–380. DOI: 10.1093/aob/mcr141.
- JAVANMARDI, FARAHNAZ; KAZEMPOUR-OSALOO, SHAHROKH; MAASSOUMI, ALI AASGHAR; NEJADSATTARI, TAHER (2012):**  
**Molecular Phylogeny of *Astragalus* Section *Alopecuroidei* (Fabaceae) and its Allies based on nrDNA ITS and three cpDNAs, *matK*, *trnT-trnY* and *trnH-psbA* Sequences.**  
 In: Biochemical Systematics and Ecology 45, p. 171–178. DOI: 10.1016/j.bse.2012.07.029.
- JOBSON, RICHARD W.; LUCKOW, MELISSA (2007):**  
**Phylogenetic Study of the Genus *Piptadenia* (Mimosoideae: Leguminosae) using Plastid *trnL-F* and *trnK / matK* Sequence Data.**  
 In: Systematic Botany 32 (3), p. 569–575. DOI: 10.1600/036364407782250544.
- JUNIOR, MARCUS JOSÉ DE AZEVEDO FALCAO; PINTO, RAFAEL BARBOSA; MANSANO, VIDAL DE FREITAS (2016):**  
**A taxonomic Revision of the Genus *Dialium* (Leguminosae: Daliinae) in the Neotropics.**  
 In: Phytotaxa 283 (2), p. 123–142. DOI: 10.11646/phytotaxa.283.2.2.
- KÄSS, E.; WINK, MICHAEL (1997):**  
**Phylogenetic Relationships in the Papilionoideae (Family Leguminosae) based on nucleotide Sequences of cpDNA (*rbcl*) and ncDNA (ITS 1 and 2).**  
 In: Molecular Phylogenetics and Evolution 8 (1), p. 65–88. DOI: 10.1006/mpev.1997.0410.
- KAZEMI, MARZIE; KAZEMPOUR-OSALOO, SHAHROKH; ASGHAR MAASSOUMI, ALI; RASTEGAR POUYANI, ESKANDAR (2009):**  
**Molecular Phylogeny of selected Old World *Astragalus* (Fabaceae): incongruence among Chloroplast *trnL-F*, *ndhF* and nuclear ribosomal DNA ITS Sequences.**  
 In: Nordic Journal of Botany 27 (5), p. 425–436. DOI: 10.1111/j.1756-1051.2009.00285.x.
- KRAMINA, TATIANA E.; DEGTJAREVA, GALINA V.; SAMIGULLIN, TAHIR H.; VALIEJO-ROMAN, CARMEN M.; KIRKBRIDE, JOSEPH H.; VOLIS, SERGEI ET AL. (2016):**  
**Phylogeny of *Lotus* (Leguminosae: Loteae): Partial incongruence between nrITS, nrETS and Plastid Markers and biogeographic Implications.**  
 In: Taxon 65 (5), p. 997–1018. DOI: 10.12705/655.4.
- KYALANGALILWA, BRUCE; BOATWRIGHT, JAMES S.; DARU, BARNABAS H.; MAURIN, OLIVIER; VAN DER BANK, MICHELLE (2013):**  
**Phylogenetic Position and revised Classification of *Acacia* s.l. (Fabaceae: Mimosoideae) in Africa, including new Combinations in *Vachellia* and *Senegalia*.**  
 In: Botanical Journal of the Linnean Society 172 (4), p. 500–523. DOI: 10.1111/boj.12047.
- LA ESTRELLA, MANUEL; WIERINGA, JAN J.; MACKINDER, BARBARA; VAN DER BURGT, XANDER; DEVESA, JUAN A.; BRUNEAU, ANNE (2014):**  
**Phylogenetic Analysis of the African Genus *Gilbertiodendron* J. Léonard and related Genera (Leguminosae-Caesalpinioideae-Detarieae).**  
 In: International Journal of Plant Sciences 175 (9), p. 975–985. DOI: 10.1086/677648.

- LAVIN, MATT; PENNINGTON, R. TOBY; KLITGAARD, BENTE B.; SPRENT, JANET I.; LIMA, HAROLDO CAVALCANTE DE; GASSON, PETER E. (2001):  
**The dalbergioid Legumes (Fabaceae): Delimitation of a pantropical monophyletic Clade.**  
In: American Journal of Botany 88 (3), p. 503–533. DOI: 10.2307/2657116.
- LE ROUX, MARIANNE M.; BOATWRIGHT, JAMES S.; VAN WYK, BEN-ERIK (2013):  
**A global infrageneric Classification system for the Genus *Crotalaria* (Leguminosae) based on molecular and morphological Evidence.**  
In: Taxon 62 (5), p. 957–971. DOI: 10.12705/625.1.
- LE ROUX, MARIANNE M.; VAN WYK, BEN-ERIK; BOATWRIGHT, JAMES S.; TILNEY, PATRICIA M. (2011):  
**The systematic Significance of morphological and anatomical Variation in fruits of *Crotalaria* and related Genera of Tribe Crotalarieae (Fabaceae).**  
In: Botanical Journal of the Linnean Society 165, p. 84–106.
- LEE, JEONGRAN; HYMOWITZ, THEODORE (2001):  
**A molecular phylogenetic Study of the Subtribe Glycininae (Leguminosae) derived from the Chloroplast DNA rps 16 Intron Sequences.**  
In: American Journal of Botany 88 (11), p. 2064–2073. DOI: 10.2307/3558432.
- LEHT, MALLE (2005):  
**Cladistic and phenetic Analyses of Relationships in *Vicia* Subgenus *Cracca* (Fabaceae) based on morphological Data.**  
In: Taxon 54 (4), p. 1023–1032. DOI: 10.2307/25065486.
- LEHT, MALLE (2009):  
**Phylogenetics of *Vicia* (Fabaceae) based on morphological Data.**  
In: Feddes Repertorium 120 (7-8), p. 379–393. DOI: 10.1002/fedr.200911117.
- LEHT, MALLE (2009):  
**Phylogeny of Old World *Lathyrus* L. (Fabaceae) based on morphological Data.**  
In: Feddes Repertorium 120 (1-2), p. 59–74. DOI: 10.1002/fedr.200811182.
- LI, JIAN-HUA; JIANG, JIN-HUO; FU, CHENG-XIN; TANG, SHAO-QING (2014):  
**Molecular Systematics and Biogeography of *Wisteria* inferred from nucleotide Sequences of nuclear and Plastid Genes.**  
In: Journal of Systematics and Evolution 52 (1), p. 40–50. DOI: 10.1111/jse.12061.
- LI, JIAN-HUA; JIANG, JIN-HUO; STEL, HOLLY VANDER; HOMKES, AUSTIN; CORAJOD, JEFFREY; BROWN, KENNETH; CHEN, ZHI-DUAN (2014):  
**Phylogenetics and Biogeography of *Apios* (Fabaceae) inferred from Sequences of Nuclear and Plastid Genes.**  
In: International Journal of Plant Sciences 175 (7), p. 764–780. DOI: 10.1086/676972.
- LIMA, LAURA CRISTINA PIRES; QUEIROZ, LUCIANO PAGANUCCI; AZEVEDON., TOZZI. MARIA GOULART DE; LEWIS, GWILYM PETER (2014):  
**A taxonomic Revision of *Desmodium* (Leguminosae, Papilionoideae) in Brazil.**  
In: Phytotaxa 169 (1), p. 1–119. DOI: 10.11646/phytotaxa.169.1.1.
- LUCKOW, MELISSA; FORTUNATO, RENÉ H.; SEDE, SILVANA M.; LIVSHULTZ, TATYANA (2005):  
**The phylogenetic Affinities of two mysterious monotypic Mimosoids from Southern South America.**  
In: Systematic Botany 30 (3), p. 585–602.

- MAHÉ, FRÉDÉRIC; MARKOVA, DRAGOMIRA N.; PASQUET, RÉMY; MISSET, MARIE-THÉRÈSE; AÏNOUCHE, ABDELKADER (2011):**  
**Isolation, Phylogeny and Evolution of the SymRK Gene in the Legume Genus *Lupinus* L.**  
In: *Molecular Phylogenetics and Evolution* 60 (1), p. 49–61. DOI: 10.1016/j.ympev.2011.04.017.
- MALAVIYA, D. R.; ROY, A. K.; KAUSHAL, P.; KUMAR, B.; TIWARI, A. (2008):**  
**Genetic similarity among *Trifolium* Species based on Isozyme Banding Pattern.**  
In: *Plant Systematics and Evolution* 276 (1-2), p. 125–136. DOI: 10.1007/s00606-008-0070-7.
- MANZANILLA, VINCENT; BRUNEAU, ANNE (2012):**  
**Phylogeny Reconstruction in the Caesalpinieae grade (Leguminosae) based on duplicated copies of the sucrose synthase Gene and Plastid Markers.**  
In: *Molecular Phylogenetics and Evolution* 65 (1), p. 149–162. DOI: 10.1016/j.ympev.2012.05.035.
- MARAZZI, BRIGITTE; ENDRESS, PETER K.; QUEIROZ, LUCIANO PAGANUCCI; CONTI, ELENA (2006):**  
**Phylogenetic Relationships within *Senna* (Leguminosae, Cassiinae) based on three Chloroplast DNA Regions: Patterns in the Evolution of Floral symmetry and extrafloral Nectaries.**  
In: *American Journal of Botany* 93 (2), p. 288–303. DOI: 10.3732/ajb.93.2.288.
- MAROUA, GHARBI; NADIA, ZITOUNA; IMEN, FADHLAOU; NEILA, TRIFI-FARAH; SONIA, MARGHALI (2014):**  
**Molecular characterization of *Lathyrus* Species using Chloroplast DNA trnH-psbA.**  
In: *Biochemical Systematics and Ecology* 57, p. 439–444. DOI: 10.1016/j.bse.2014.09.002.
- MAUREIRA-BUTLER, IVÁN J.; PFEIL, BERNARD E.; MUANGPROM, AMORNTIP; OSBORN, THOMAS C.; DOYLE, JEFF J. (2008):**  
**The reticulate History of *Medicago* (Fabaceae).**  
In: *Systematic Biology* 57 (3), p. 466–482. DOI: 10.1080/10635150802172168.
- MAYER, M. S.; BAGGA, P. K. (2002):**  
**The Phylogeny of *Lens* (Leguminosae): new Insight from ITS Sequence Analysis.**  
In: *Plant Systematics and Evolution* 232 (3-4), p. 145–154. DOI: 10.1007/s006060200038.
- MCMAHON, MICHELLE; HUFFORD, LARRY (2004):**  
**Phylogeny of Amorpheae (Fabaceae: Papilionoideae).**  
In: *American Journal of Botany* 91 (8), p. 1219–1230. DOI: 10.3732/ajb.91.8.1219.
- MCMAHON, MICHELLE; HUFFORD, LARRY (2005):**  
**Evolution and Development in the Amorphoid Clade (Amorpheae: Papilionoideae: Leguminosae): Petal Loss and Dedifferentiation.**  
In: *International Journal of Plant Sciences* 166 (3), p. 383–396.
- MEIRELES, JOSE EDUARDO; AZEVEDO TOZZI, ANA MARIA GOULART (2015):**  
***Limadendron*: a new Genus of Leguminosae (Papilionoideae, Brongniartieae) from South America.**  
In: *Plant Systematics and Evolution* 301 (2), p. 701–707. DOI: 10.1007/s00606-014-1108-7.
- MENG, HONG-HU; JACQUES, FRÉDÉRIC M.B.; SU, TAO; HUANG, YONG-JIANG; ZHANG, SHI-TAO; MA, HONG-JIE; ZHOU, ZHE-KUN (2014):**  
**New Biogeographic Insight into *Bauhinia* s.l. (Leguminosae): integration from fossil Records and molecular Analyses.**  
In: *BMC Evolutionary Biology* 14, p. 181. DOI: 10.1186/s12862-014-0181-4.
- MILLER, JOSEPH T.H.; BAYER, RANDALL J. (2001):**

- Molecular Phylogenetics of *Acacia* (Fabaceae: Mimosoideae) based on the Chloroplast *matK* coding Sequence and Flanking *trnK* Intron Spacer Regions.**  
In: American Journal of Botany 88 (4), p. 697–705. DOI: 10.2307/2657071.
- MILLER, JOSEPH T.H.; GRIMES, JAMES W.; MURPHY, DANIEL J.; BAYER, RANDALL J.; LADIGES, PAULINE Y. (2003):  
A phylogenetic Analysis of the Acacieae and Ingeae (Mimosoideae: Fabaceae) based on *trnK*, *matK*, *psbA-trnH*, and *trnL/trnF* Sequence Data.**  
In: Systematic Botany 28 (3), p. 558–566.
- MILLER, JOSEPH T.H.; SEIGLER, DAVID P. (2012):  
Evolutionary and taxonomic Relationships of *Acacia* s.l. (Leguminosae: Mimosoideae).**  
In: Australian Systematic Botany 25 (3), p. 217–224. DOI: 10.1071/SB11042.
- MOTEETEE, A.; VAN WYK, BEN-ERIK (2008):  
A Synopsis of the Middle-eastern and Asian Species of *Argyrobium* (Genisteae–Fabaceae).**  
In: South African Journal of Botany 74 (1), p. 10–24. DOI: 10.1016/j.sajb.2007.07.007.
- MOURA, TANIA MARIA DE; LEWIS, GWILYM PETER (2014):  
Taxonomic studies in the *Mucuna poggei* complex (Leguminosae: Papilionoideae).**  
In: Kew Bulletin 69 (4). DOI: 10.1007/S12225-014-9544-7.
- MOURA, TANIA MARIA DE; VATANPARAST, MOHAMMAD; TOZZI, ANA MARIA GOULART DE AZEVEDO; FOREST, FÉLIX; WILMOT-DEAR, C. MELANIE; SIMON, MARCELO FRAGOMENI ET AL. (2016):  
A molecular Phylogeny and new Infrageneric Classification of *Mucuna* Adans. (Leguminosae-Papilionoideae) including Insights from Morphology and Hypotheses about Biogeography.**  
In: International Journal of Plant Sciences 177 (1), p. 76–89. DOI: 10.1086/684131.
- MOURA, TANIA MARIA DE; WILMOT-DEAR, C. MELANIE; VATANPARAST, MOHAMMAD; FORTUNA-PEREZ, ANA PAULA; TOZZI, ANA MARIA GOULART DE AZEVEDO; LEWIS, GWILYM PETER (2016):  
A new Infrageneric Classification of *Mucuna* (Leguminosae-Papilionoideae): Supported by Morphology, molecular Phylogeny and Biogeography.**  
In: Systematic Botany 41 (3), p. 606–616. DOI: 10.1600/036364416X692532.
- MURPHY, DANIEL J.; BROWN, GILLIAN K.; MILLER, JOSEPH T.H.; LADIGES, PAULINE Y. (2010):  
Molecular Phylogeny of *Acacia* Mill. (Mimosoideae: Leguminosae): Evidence for major Clades and informal Classification.**  
In: Taxon 59 (1), p. 7–19. DOI: 10.1002/tax.591002.
- MURPHY, DANIEL J.; UDOVICIC, FRANK; LADIGES, PAULINE Y. (2000):  
Phylogenetic Analysis of Australian *Acacia* (Leguminosae: Mimosoideae) by using Sequence Variations of an Intron and two intergenic Spacers of Chloroplast DNA.**  
In: Australian Systematic Botany 13 (5), p. 745–754. DOI: 10.1071/SB99027.
- NADERI SAFAR, KOSAR; KAZEMPOUR-OSALOO, SHAHROKH; MAASSOUMI, ALI AASGHAR; ZARRE, SHAHIN (2014):  
Molecular Phylogeny of *Astragalus* Section Anthylloidei (Fabaceae) inferred from nrDNA ITS and Plastid *rpl32-trnL(UAG)* Sequence Data.**  
In: Turkish Journal of Botany 38, p. 637–652. DOI: 10.3906/bot-1308-44.
- NADIA, ZITOUNA; MAROUA, GHARBI; HELA, BEN RHOUMA; HOUDA, CHENNAOUI-KOURDA; ABDELMAJID, HADDIOUI; NEILA, TRIFI-FARAH; SONIA, MARGHALI (2014):**

- Evolutionary and demographic History among Maghrebian *Medicago* Species (Fabaceae) based on the nucleotide Sequences of the Chloroplast DNA barcode trnH-psbA.**  
In: *Biochemical Systematics and Ecology* 55, p. 296–304. DOI: 10.1016/j.bse.2014.03.016.
- NAGANOWSKA, B.; WOLKO, B.; ŚLIWIŃSKA, E.; KACZMAREK, Z.; SCHIFINO-WITTMANN, M. T. (2005):  
2c DNA Variation and Relationships among New World Species of the Genus *Lupinus* (Fabaceae).**  
In: *Plant Systematics and Evolution* 256 (1-4), p. 147–157. DOI: 10.1007/s00606-005-0364-y.
- NANNI, L.; FERRADINI, N.; TAFFETANI, F.; PAPA, R. (2004):  
Molecular Phylogeny of *Anthyllis* spp.**  
In: *Plant Biology* 6 (4), p. 454–464. DOI: 10.1055/s-2004-820968.
- NASSEH, Y.; JOHARCHI, MOHAMMAD REZA (2012):  
New Records and new Synonym of *Astragalus* Sections *Ammodendron* and *Carpini* (Fabaceae) from Iran.**  
In: *Iranian Journal of Botany* 18 (1), p. 76–83.
- NORES, MARÍA J.; SIMPSON, BERYL B.; HICK, PASCALE; ANTON, ANA M.; FORTUNATO, RENÉ H. (2012):  
The phylogenetic Relationships of four monospecific Caesalpinioids (Leguminosae) endemic to southern South America.**  
In: *Taxon* 61 (4), p. 790–802.
- OJEDA, ISIDRO; SANTOS-GUERRA, ARNOLDO; JAÉN-MOLINA, RUTH; OLIVA-TEJERA, FELICIA; CAUJAPÉ-CASTELLS, JULI; CRONK, QUENTIN C.B. (2012):  
The Origin of Bird Pollination in Macaronesian *Lotus* (Loteae, Leguminosae).**  
In: *Molecular Phylogenetics and Evolution* 62 (1), p. 306–318. DOI: 10.1016/j.ympev.2011.10.001.
- ORTEGA-OLIVENCIA, ANA; CATALÁN, PILAR (2009):  
Systematics and evolutionary History of the Circum-mediterranean Genus *Anagyris* L. (Fabaceae) based on morphological and molecular Data.**  
In: *Taxon* 58 (4), p. 1290–1306. DOI: 10.1002/tax.584018.
- ORTHIA, L. A.; COOK, LYN G.; CRISP, MICHAEL D. (2005):  
Generic Delimitation and phylogenetic uncertainty: an Example from a Group that has undergone an explosive Radiation.**  
In: *Australian Systematic Botany* 18 (1), p. 41–47. DOI: 10.1071/SB04016.
- OSALOO, SHAHROKH KAZEMPOUR; MAASSOUMI, ALI AASGHAR; MURAKAMI, NORIAKI (2003):  
Molecular Systematics of the Genus *Astragalus* L. (Fabaceae): phylogenetic Analyses of nuclear ribosomal DNA internal transcribed Spacers and Chloroplast Gene *ndh F* Sequences.**  
In: *Plant Systematics and Evolution* 242 (1-4), p. 1–32. DOI: 10.1007/s00606-003-0014-1.
- OSKOEIYAN, ROGHAYEH; KAZEMPOUR-OSALOO, SHAHROKH; MAASSOUMI, ALI AASGHAR; NEJADSATTARI, TAHER; MOZAFFARIAN, VALIOLLAH (2010):  
Phylogenetic Status of *Vavilovia formosa* (Fabaceae-Fabeae) based on nrDNA ITS and cpDNA Sequences.**  
In: *Biochemical Systematics and Ecology* 38 (3), p. 313–319. DOI: 10.1016/j.bse.2010.01.011.
- ÖZTÜRK, MERYEM; DURAN, AHMET; HAKKI, ERDOGAN E. (2013):  
Cladistic and phylogenetic Analyses of the Genus *Cicer* in Turkey.**  
In: *Plant Systematics and Evolution* 299 (10), p. 1955–1966. DOI: 10.1007/s00606-013-0850-6.



- PARDO, CRISTINA; CUBAS, PALOMA; TAHIRI, HIKMAT (2004):**  
**Molecular Phylogeny and Systematics of *Genista* (Leguminosae) and related Genera based on nucleotide Sequences of nrDNA (ITS Region) and cpDNA (trnL-trnF intergenic spacer).**  
 In: *Plant Systematics and Evolution* 244 (1-2), p. 93–119. DOI: 10.1007/s00606-003-0091-1.
- POOYAN, P.; GHAREMANINEJAD, FARROKH; ASSADI, MOSTAFA (2014):**  
**A Synopsis of the Genus *Colutea* (Fabaceae) in Iran.**  
 In: *Edinburgh Journal of Botany* 71 (1), p. 35–49. DOI: 10.1017/S0960428613000280.
- QUEIROZ, LUCIANO PAGANUCCI; LAVIN, MATT (2011):**  
***Coursetia* (Leguminosae) from Eastern Brazil: Nuclear Ribosomal and Chloroplast DNA Sequence Analysis reveal the Monophyly of three Caatinga-inhabiting Species.**  
 In: *Systematic Botany* 36 (1), p. 69–79. DOI: 10.1600/036364411X553144.
- QUEIROZ, LUCIANO PAGANUCCI; PASTORE, JOSÉ FLORIANO B.; CARDOSO, DOMINGOS; SNAK, CRISTIANE; LIMA, ANA LUÍSA C.; GAGNON, EDELINE ET AL. (2015):**  
**A multilocus phylogenetic Analysis reveals the Monophyly of a recircumscribed papilionoid Legume Tribe Diocleae with well-supported generic Relationships.**  
 In: *Molecular Phylogenetics and Evolution* 90, p. 1–19. DOI: 10.1016/j.ympev.2015.04.016.
- RAMOS, GUSTAVO; LIMA, HAROLDO CAVALCANTE DE; PRENNER, GERHARD; QUEIROZ, LUCIANO PAGANUCCI; ZARTMAN, CHARLES E.; CARDOSO, DOMINGOS (2016):**  
**Molecular Systematics of the Amazonian Genus *Aldina*, a phylogenetically enigmatic ectomycorrhizal Lineage of papilionoid Legumes.**  
 In: *Molecular Phylogenetics and Evolution* 97, p. 11–18. DOI: 10.1016/j.ympev.2015.12.017.
- RANDO, JULIANA GASTALDELLO; ZUNTINI, ALEXANDRE R.; CONCEIÇÃO, ADILVA DE SOUZA; VAN DEN BERG, CÁSSIO; PIRANI, JOSÉ RUBENS; QUEIROZ, LUCIANO PAGANUCCI (2016):**  
**Phylogeny of *Chamaecrista* ser. *Coriaceae* (Leguminosae) unveils a Lineage recently diversified in Brazilian Campo-Rupestre Vegetation.**  
 In: *International Journal of Plant Sciences* 177 (1), p. 3–17. DOI: 10.1086/683846.
- RANJBAR, MASSOUD; HAJMORADI, FATEMEH; WAYCOTT, MICHELLE; VAN DIJK, KOR-JENT (2014):**  
**A Phylogeny of the Tribe Caraganeae (Fabaceae) based on DNA Sequence Data from ITS.**  
 In: *Feddes Repertorium* 125 (3-4), p. 78–84. DOI: 10.1002/fedr.201400051.
- REDDEN, KAREN M.; HERENDEEN, PATRICK P. (2006):**  
**Morphology and phylogenetic Analysis of *Paloue* and related Genera in the *Brownea* Clade (Detarieae, Caesalpinioideae).**  
 In: *International Journal of Plant Sciences* 167 (6), p. 1229–1246.
- REDDEN, KAREN M.; HERENDEEN, PATRICK S.; WURDACK, KENNETH J.J.; BRUNEAU, ANNE (2010):**  
**Phylogenetic Relationships of the Northeastern South American *Brownea* Clade of Tribe Detarieae (Leguminosae: Caesalpinioideae) based on Morphology and molecular Data.**  
 In: *Systematic Botany* 35 (3), p. 524–533. DOI: 10.1600/036364410792495863.
- RIahi, MEHRSHID; ZARRE, SHAHIN; MAASSOUMI, ALI AASGHAR; KAZEMPOUR-OSALOO, SHAHROKH; WOJCIECHOWSKI, MARTIN F. (2011):**  
**Towards a Phylogeny for *Astragalus* Section *Caprini* (Fabaceae) and its Allies based on nuclear and Plastid DNA Sequences.**  
 In: *Plant Systematics and Evolution* 293 (1-4), p. 119–133. DOI: 10.1007/s00606-011-0417-3.

- RIBEIRO, RENATA ACÁCIO; LAVIN, MATT; LEMOS-FILHO, JOSÉ PIRES; FILHO, CARLOS VICTOR MENDONÇA; SANTOS, FABRÍCIO RODRIGUES DOS; LOVATO, MARIA BERNADETE (2007):  
**The Genus *Machaerium* (Leguminosae) is more closely related to *Aeschynomene* Sect. *Ochopodium* than to *Dalbergia*: Inferences from combined Sequence Data.**  
 In: Systematic Botany 32 (4), p. 762–771.
- ROCKINGER, ALEXANDER; FLORES, ANDRÉIA SILVA; RENNER, SUSANNE P. (2017):  
**Clock-dated Phylogeny for 48% of the 700 Species of *Crotalaria* (Fabaceae-Papilionoideae) resolves Sections worldwide and implies conserved flower and Leaf traits throughout its Pantropical Range.**  
 In: BMC Evolutionary Biology 17 (1), p. 61. DOI: 10.1186/s12862-017-0903-5.
- RODRIGUES, RODRIGO SCHÜTZ; FLORES, ANDRÉIA SILVA (2012):  
**A new Combination in *Entada* (Leguminosae) from Roraima, Brazil.**  
 In: Phytotaxa 39, p. 47–50.
- SAINI, AJAY; JAWALI, NARENDRA (2009):  
**Molecular Evolution of 5s rDNA Region in *Vigna* Subgenus *Ceratotropis* and its phylogenetic Implications.**  
 In: Plant Systematics and Evolution 280 (3-4), p. 187–206. DOI: 10.1007/s00606-009-0178-4.
- SAKAI, M.; KANAZAWA, A.; FUJII, A.; THSENG, F. S.; ABE, J.; SHIMAMOTO, Y. (2003):  
**Phylogenetic Relationships of the Chloroplast Genomes in the Genus *Glycine* inferred from four intergenic spacer Sequences.**  
 In: Plant Systematics and Evolution 239 (1-2), p. 29–54. DOI: 10.1007/s00606-002-0226-9.
- SAMAD, FARAH ABDEL; BAUMEL, ALEX; JUIN, MARIANICK; PAVON, DANIEL; SILJAK-YAKOVLEV, SONJA; MÉDAIL, FRÉDÉRIC; BOU DAGHER KHARRAT, MAGDA (2014):  
**Phylogenetic Diversity and Genome sizes of *Astragalus* (Fabaceae) in the Lebanon biogeographical Crossroad.**  
 In: Plant Systematics and Evolution 300 (5), p. 819–830. DOI: 10.1007/s00606-013-0921-8.
- SÄRKINEN, TIINA E.; MARCELO-PEÑA, JOSÉ LUIS; YOMONA, A. DAZA; SIMON, MARCELO FRAGOMENI; PENNINGTON, R. TOBY; HUGHES, COLIN E. (2011):  
**Underestimated endemic Species Diversity in the dry inter-Andean valley of the Río Marañón, northern Peru: An example from *Mimosa* (Leguminosae, Mimosoideae).**  
 In: Taxon 60 (1), p. 139–150. DOI: 10.1002/tax.601012.
- SASLIS-LAGOUDAKIS, CHARILAOS; CHASE, MARK W.; ROBINSON, DANIEL N.; RUSSELL, STEPHEN J.; KLITGAARD, BENTE B. (2008):  
**Phylogenetics of Neotropical *Platymiscium* (Leguminosae: Dalbergieae): Systematics, Divergence times, and Biogeography inferred from nuclear ribosomal and Plastid DNA Sequence Data.**  
 In: American Journal of Botany 95 (10), p. 1270–1286. DOI: 10.3732/ajb.0800101.
- SCHAEFER, HANNO; HECHENLEITNER, PAULINA; SANTOS-GUERRA, ARNOLDO; MENEZES DE SEQUEIRA, MIGUEL; PENNINGTON, R. TOBY; KENICER, GREGORY; CARINE, MARK A. (2012):  
**Systematics, Biogeography, and Character Evolution of the Legume Tribe Fabeae with special Focus on the Middle-Atlantic Island Lineages.**  
 In: BMC Evolutionary Biology 12, p. 250. DOI: 10.1186/1471-2148-12-250.
- SCHERSON, ROSA A.; VIDAL, RODRIGO; SANDERSON, MICHAEL J. (2008):  
**Phylogeny, Biogeography, and rates of Diversification of New World *Astragalus* (Leguminosae) with an Emphasis on South American Radiations.**

- In: American Journal of Botany 95 (8), p. 1030–1039. DOI: 10.3732/ajb.0800017.
- SCHLEY, ROWAN J.; LA ESTRELLA, MANUEL; PÉREZ-ESCOBAR, OSCAR ALEJANDRO; BRUNEAU, ANNE; BARRACLOUGH, TIMOTHY G.; FOREST, FÉLIX; KLITGÅRD, BENTE B. (2018):**  
**Is Amazonia a 'Museum' for Neotropical Trees? the Evolution of the *Brownea* Clade (Detarioideae, Leguminosae).**  
In: Molecular Phylogenetics and Evolution 126, p. 279–292. DOI: 10.1016/j.ympev.2018.04.029.
- SCHNABEL, ANDREW; McDONEL, PATRICK E.; WENDEL, JONATHAN F. (2003):**  
**Phylogenetic Relationships in *Gleditsia* (Leguminosae) based on ITS Sequences.**  
In: American Journal of Botany 90 (2), p. 310–320. DOI: 10.3732/ajb.90.2.310.
- SCHNABEL, ANDREW; WENDEL, JONATHAN F. (1998):**  
**Cladistic Biogeography of *Gleditsia* (Leguminosae) based on ndhF and rpl16 Chloroplast Gene Sequences.**  
In: American Journal of Botany 85 (12), p. 1753–1765. DOI: 10.2307/2446510.
- SCHRIRE, BRIAN D.; LAVIN, MATT; BARKER, NIGEL P.; FOREST, FÉLIX (2009):**  
**Phylogeny of the Tribe Indigofereae (Leguminosae-Papilionoideae): Geographically Structured more in succulent-rich and temperate Settings than in grass-rich Environments.**  
In: American Journal of Botany 96 (4), p. 816–852. DOI: 10.3732/ajb.0800185.
- SCHUTTE-VLOK, ANNE LISE; VAN WYK, BEN-ERIK (2011):**  
**A taxonomic Revision of *Podalyria* (Fabaceae).**  
In: Systematic Botany 36 (3), p. 631–660. DOI: 10.1600/036364411X583628.
- SEDE, SILVANA M.; TOSTO, D. S.; GOTTLIEB, ALEXANDRA M.; POGGIO, LIDIA; FORTUNATO, RENÉ H. (2008):**  
**Genetic Relationships in the *Galactia–Camptosema–Collaea* complex (Leguminosae) inferred from AFLP Markers.**  
In: Plant Systematics and Evolution 276 (3-4), p. 261–270. DOI: 10.1007/s00606-008-0100-5.
- SHAHI SHAVVON, ROBABEH; KAZEMPOUR-OSALOO, SHAHROKH; MAASSOUMI, ALI AASGHAR; MOHARREK, FARIDEH; KARAMAN ERKUL, SEHER; LEMMON, ALAN R. ET AL. (2017):**  
**Increasing phylogenetic support for explosively radiating taxa: the promise of high-throughput Sequencing for *Oxytropis* (Fabaceae).**  
In: Journal of Systematics and Evolution 55 (4), p. 385–404. DOI: 10.1111/jse.12269.
- SILVA, MARCOS JOSÉ DA; QUEIROZ, LUCIANO PAGANUCCI; TOZZI, ANA MARIA GOULART DE AZEVEDO; LEWIS, GWILYM PETER; SOUSA, ANETE PEREIRA DE (2012):**  
**Phylogeny and Biogeography of *Lonchocarpus* sensu lato and its Allies in the Tribe Millettieae (Leguminosae, Papilionoideae).**  
In: Taxon 61 (1), p. 93–108.
- SIMON, MARCELO FRAGOMENI; GREYER, ROSAURA; QUEIROZ, LUCIANO PAGANUCCI; SÄRKINEN, TIINA E.; DUTRA, VALQUÍRIA F.; HUGHES, COLIN E. (2011):**  
**The evolutionary History of *Mimosa* (Leguminosae): toward a Phylogeny of the sensitive Plants.**  
In: American Journal of Botany 98 (7), p. 1201–1221. DOI: 10.3732/ajb.1000520.
- SIMON, MARCELO FRAGOMENI; PASTORE, JOSÉ FLORIANO B.; SOUZA, ADRIANA F.; BORGES, LEONARDO MAURICI; SCALON, VIVIANE R.; RIBEIRO, PÉTALA G. ET AL. (2016):**  
**Molecular Phylogeny of *Stryphnodendron* (Mimosoideae, Leguminosae) and Generic Delimitations in the *Piptadenia* Group.**  
In: International Journal of Plant Sciences 177 (1), p. 44–59. DOI: 10.1086/684077.

- SIMPSON, BERYL B.; LARKIN, LEAH L.; WEEKS, ANDREA; McDILL, JOSHUA R. (2006):**  
**Phylogeny and Biogeography of *Pomaria* (Caesalpinioideae: Leguminosae).**  
 In: Systematic Botany 31 (4), p. 792–804.
- SINOUE, CAROLE; FOREST, FÉLIX; LEWIS, GWILYM PETER; BRUNEAU, ANNE (2009):**  
**The Genus *Bauhinia* s.l. (Leguminosae): a Phylogeny based on the Plastid trnL–trnF Region.**  
 In: Botany 87 (10), p. 947–960. DOI: 10.1139/B09-065.
- SIRICHAMORN, YOTSAWATE; ADEMA, FRITS A.C.B.; GRAVENDEEL, BARBARA; VAN WELZEN, PETER C. (2012):**  
**Phylogeny of Palaeotropical *Derris*-like Taxa (Fabaceae) based on Chloroplast and nuclear DNA Sequences shows Reorganization of (infra)generic Classifications is needed.**  
 In: American Journal of Botany 99 (11), p. 1793–1808. DOI: 10.3732/ajb.1200390.
- SIRICHAMORN, YOTSAWATE; ADEMA, FRITS A.C.B.; ROOS, MARCO C.; VAN WELZEN, PETER C. (2014):**  
**Molecular and morphological phylogenetic Reconstruction reveals a new generic Delimitation of Asian *Derris* (Fabaceae): Reinstatement of *Solori* and Synonymisation of *Paraderris* with *Derris*.**  
 In: Taxon 63 (3), p. 522–538. DOI: 10.12705/633.13.
- SMITH, JAMES F.; ZIMMERS., J. C. (2017):**  
**New Combination in *Astragalus* (Fabaceae).**  
 In: Phytoneuron 38, p. 1–3.
- SNAK, CRISTIANE; VATANPARAST, MOHAMMAD; SILVA, CHRISTIAN; LEWIS, GWILYM PETER; LAVIN, MATT; KAJITA, TADASHI; QUEIROZ, LUCIANO PAGANUCCI (2016):**  
**A dated Phylogeny of the papilionoid Legume Genus *Canavalia* reveals recent Diversification by a Pantropical Liana Lineage.**  
 In: Molecular Phylogenetics and Evolution 98, p. 133–146. DOI: 10.1016/j.ympev.2016.02.001.
- SOTUYO, SOLANGE; CONTRERAS, JOSÉ LUIS; GAGNON, EDELINE; LEWIS, GWILYM PETER (2017):**  
**A Synopsis of *Coulteria* (Leguminosae), including new Names and Synonyms.**  
 In: Phytotaxa 291 (1), p. 33. DOI: 10.11646/phytotaxa.291.1.3.
- SOUSA, FILIPE; BERTRAND, YANN J.K.; PFEIL, BERNARD E. (2016):**  
**Patterns of phylogenetic Incongruence in *Medicago* found among six Loci.**  
 In: Plant Systematics and Evolution 302 (5), p. 493–513. DOI: 10.1007/s00606-016-1278-6.
- SOUSA, MARIO S.; SOLANGE SOTUYO, J. (2012):**  
**El Genero *Muellera* L.f. en Mesoamerica y Norte de Sudamerica.**  
 In: Acta Botanica Mexicana 100, p. 15–40.
- SOUSA, MARIO S.; SOTUYO, SOLANGE; PEDRAZA-ORTEGA, EULER (2014):**  
**Sistemática de *Lonchocarpus* sección *Punctati* (Fabaceae: Millettiieae), basada en Datos morfológicos y moleculares, con la Descripción de nueve Especies nuevas.**  
 In: Acta Botanica Mexicana 109, p. 79. DOI: 10.21829/abm109.2014.1148.
- SOUZA CONCEIÇÃO, ADILVA; PAGANUCCI DE QUEIROZ, LUCIANO; LEWIS, GWILYM PETER; GOMES DE ANDRADE, MARIA JOSÉ; MACHADO DE ALMEIDA, PAULO RICARDO; SCHNADELBACH, ALESSANDRA SELBACH; VAN DEN BERG, CÁSSIO (2009):**  
**Phylogeny of *Chamaecrista* Moench (Leguminosae-Caesalpinioideae) based on nuclear and Chloroplast DNA Regions.**  
 In: Taxon 58 (4), p. 1168–1180. DOI: 10.1002/tax.584010.
- SOUZA, ALESSANDRO OLIVEIRA; SILVA, MARCOS JOSÉ DA (2015):**

**What's new in *Chamaecrista* (Fabaceae, Caesalpinioideae) from the Brazilian Cerrado?**

In: Phytotaxa 213 (3), p. 253. DOI: 10.11646/phytotaxa.213.3.5.

**SOUZA, ÉLVIA RODRIGUES; LEWIS, GWILYM PETER; FOREST, FÉLIX; SCHNADELBACH, ALESSANDRA SELBACH; VAN DEN BERG, CÁSSIO; QUEIROZ, LUCIANO PAGANUCCI (2013):**

**Phylogeny of *Calliandra* (Leguminosae: Mimosoideae) based on nuclear and Plastid molecular Markers.**

In: Taxon 62 (6), p. 1200–1219. DOI: 10.12705/626.2.

**SOUZA, ISYS MASCARENHAS; FUNCH, LIGIA SILVEIRA; QUEIROZ, LUCIANO PAGANUCCI (2014):**

**Morphological Analyses suggest a new taxonomic Circumscription for *Hymenaea courbaril* L. (Leguminosae, Caesalpinioideae).**

In: PhytoKeys (38), p. 101–118. DOI: 10.3897/phytokeys.38.7408.

**STEELE, KELLY P.; ICKERT-BOND, STEFANIE M.; ZARRE, SHAHIN; WOJCIECHOWSKI, MARTIN F. (2010):**

**Phylogeny and Character Evolution in *Medicago* (Leguminosae): Evidence from Analyses of Plastid trnK/matK and nuclear GA3ox1 Sequences.**

In: American Journal of Botany 97 (7), p. 1142–1155. DOI: 10.3732/ajb.1000009.

**STEFANOVIĆ, SAŠA; PFEIL, BERNARD E.; PALMER, JEFFREY D.; DOYLE, JEFF J. (2009):**

**Relationships among Phaseoloid Legumes based on Sequences from eight Chloroplast Regions.**

In: Systematic Botany 34 (1), p. 115–128. DOI: 10.1600/036364409787602221.

**STRAUB, SHANNON C. K.; DOYLE, JEFF J. (2014):**

**Molecular Phylogenetics of *Amorpha* (Fabaceae): an Evaluation of Monophyly, Species Relationships, and polyploid Origins.**

In: Molecular Phylogenetics and Evolution 76, p. 49–66. DOI: 10.1016/j.ympev.2014.02.025.

**SUBRAMANIAM, SHWETA; PANDEY, ARUN KUMAR; GEETA, R.; MORT, MARK E. (2013):**

**Molecular Systematics of Indian *Crotalaria* (Fabaceae) based on Analyses of nuclear ribosomal ITS DNA Sequences.**

In: Plant Systematics and Evolution 299 (6), p. 1089–1106. DOI: 10.1007/s00606-013-0781-2.

**SUBRAMANIAM, SHWETA; PANDEY, ARUN KUMAR; RATHER, SHABIR A. (2015):**

**A revised Circumscription of the Species in *Bracteatae* complex (section *Calycinae*) in the Genus *Crotalaria* L.: Evidence from nuclear and Chloroplast Markers.**

In: Plant Systematics and Evolution 301 (9), p. 2261–2290. DOI: 10.1007/s00606-015-1228-8.

**SVEINSSON, SAEMUNDUR; CRONK, QUENTIN C.B. (2014):**

**Evolutionary Origin of highly repetitive Plastid Genomes within the clover Genus (*Trifolium*).**

In: BMC Evolutionary Biology 14, p. 228. DOI: 10.1186/s12862-014-0228-6.

**TEKPINAR, AYTEN; KARAMAN ERKUL, SEHER; AYTAÇ, ZEKI; KAYA, ZEKI (2016):**

**Phylogenetic Relationships among native *Oxytropis* Species in Turkey Using the trnL Intron, trnL-F Igs, and trnV Intron cpDNA Regions.**

In: Turkish Journal of Botany 40, p. 472–479. DOI: 10.3906/bot-1506-45.

**THOMPSON, IAN R. (2012):**

**A Revision of eastern Australian *Bossiaea* (Fabaceae: Bossiaceae).**

In: Muellera 30 (2), p. 106–174.

**TORKE, BENJAMIN M.; MANSANO, VIDAL DE FREITAS (2009):**

**A phylogenetically based Sectional Classification of *Swartzia* (Leguminosae-Papilionoideae).**

In: *Taxon* 58 (3), p. 913–924. DOI: 10.1002/tax.583019.

**TORKE, BENJAMIN M.; SCHAAL, BARBARA A. (2008):**

**Molecular Phylogenetics of the species-rich Neotropical Genus *Swartzia* (Leguminosae, Papilionoideae) and related Genera of the Swartzioid Clade.**

In: *American Journal of Botany* 95 (2), p. 215–228. DOI: 10.3732/ajb.95.2.215.

**TOSSO, FÉLICIEN; HARDY, OLIVIER J.; DOUCET, JEAN-LOUIS; DAÏNOU, KASSO; KAYMAK, ESRA; MIGLIORE, JÉRÉMY (2018):**  
**Evolution in the Amphi-Atlantic tropical Genus *Guibourtia* (Fabaceae, Detarioideae), combining NGS Phylogeny and Morphology.**

In: *Molecular Phylogenetics and Evolution* 120, p. 83–93. DOI: 10.1016/j.ympev.2017.11.026.

**TRETHOWAN, LIAM; CLARK, RUTH; MACKINDER, BARBARA (2015):**

**A Synopsis of the Neotropical Genus *Schnella* (Cercideae: Caesalpinioideae: Leguminosae) including 12 new Combinations.**

In: *Phytotaxa* 204 (4), p. 237. DOI: 10.11646/phytotaxa.204.4.1.

**TURINI, FLORIAN G.; BRÄUCHLER, CHRISTIAN; HEUBL, GÜNTHER (2010):**

**Phylogenetic Relationships and Evolution of morphological Characters in *Ononis* L. (Fabaceae).**

In: *Taxon* 59 (4), p. 1077–1090. DOI: 10.1002/tax.594008.

**UYSAL, TUNA; ERTUĞRUL, KUDDISI; BOZKURT, MERYEM (2014):**

**A new Genus segregated from *Thermopsis* (Fabaceae: Papilionoideae): *Vuralia*.**

In: *Plant Systematics and Evolution* 300 (7), p. 1627–1637. DOI: 10.1007/s00606-014-0988-x.

**VAN DE WOUW, M.; MAXTED, N.; CHABANE, K.; FORD-LLOYD, B. V. (2001):**

**Molecular Taxonomy of *Vicia ser. Vicia* based on amplified Fragment Length Polymorphisms.**

In: *Plant Systematics and Evolution* 229 (1-2), p. 91–105. DOI: 10.1007/s006060170020.

**VAN DER BANK, MICHELLE; CHASE, MARK W.; VAN WYK, BEN-ERIK; FAY, MICHAEL F.; VAN DER BANK, FREDERICK H.; REEVES, GAIL; HULME, ALAN (2002):**

**Systematics of the Tribe Podalyrieae (Fabaceae) based on DNA, morphological and chemical Data.**

In: *Botanical Journal of the Linnean Society* 139 (2), p. 159–170. DOI: 10.1046/j.1095-8339.2002.00051.x.

**VAN DER MAESEN, L. J. G. (2003):**

**Cajaninae of Australia (Leguminosae: Papilionoideae).**

In: *Australian Systematic Botany* 16 (2), p. 219–227. DOI: 10.1071/SB01047.

**VAN DER WERFF, HENK (2008):**

**A Synopsis of the Genus *Tachigali* (Leguminosae: Caesalpinioideae) in Northern South America.**

In: *Annals of the Missouri Botanical Garden* 95 (4), p. 618–661. DOI: 10.3417/2007159.

**VANDER STAPPEN, J.; LAET, JAN; GAMA-LÓPEZ, S.; VAN CAMPENHOUT, S.; VOLCKAERT, G. (2002):**

**Phylogenetic Analysis of *Stylosanthes* (Fabaceae) based on the Internal Transcribed Spacer Region (ITS) of nuclear ribosomal DNA.**

In: *Plant Systematics and Evolution* 234 (1), p. 27–51. DOI: 10.1007/s00606-002-0193-1.

**VARELA, EDUARDO S.; LIMA, JOÃO P.M.S.; GALDINO, ALEXSANDRO S.; PINTO, LUCIANO DA S.; BEZERRA, WALDERLY M.; NUNES, EDSON P. ET AL. (2004):**

- Relationships in Subtribe Diocleinae (Leguminosae; Papilionoideae) inferred from Internal Transcribed Spacer Sequences from nuclear ribosomal DNA.**  
In: *Phytochemistry* 65 (1), p. 59–69. DOI: 10.1016/j.phytochem.2003.08.005.
- VATANPARAST, MOHAMMAD; KLITGÅRD, BENTE B.; ADEMA, FRITS A.C.B.; PENNINGTON, R. TOBY; YAHARA, TETSUKAZU; KAJITA, TADASHI (2013):**  
**First molecular Phylogeny of the pantropical Genus *Dalbergia*: Implications for infrageneric Circumscription and Biogeography.**  
In: *South African Journal of Botany* 89, p. 143–149. DOI: 10.1016/j.sajb.2013.07.001.
- WAGSTAFF, STEVEN J.; HEENAN, PETER B.; SANDERSON, MICHAEL J. (1999):**  
**Classification, Origins, and Patterns of Diversification in New Zealand Carmichaelinae (Fabaceae).**  
In: *American Journal of Botany* 86 (9), p. 1346–1356. DOI: 10.2307/2656781.
- WANG, H. C.; SUN, H.; COMPTON, J. A.; YANG, J.-B. (2006):**  
**A Phylogeny of Thermopsidae (Leguminosae: Papilionoideae) inferred from nuclear ribosomal Internal Transcribed Spacer (ITS) Sequences.**  
In: *Botanical Journal of the Linnean Society* 151 (3), p. 365–373. DOI: 10.1111/j.1095-8339.2006.00512.x.
- WARWICK, M. C.; LEWIS, GWILYM PETER; LIMA, HAROLDO CAVALCANTE DE (2008):**  
**A reappraisal of *Barnebydendron* (Leguminosae: Caesalpinioideae: Detarieae).**  
In: *Kew Bulletin* 63 (1), p. 143–149. DOI: 10.1007/s12225-007-9001-y.
- WATSON, LINDA E.; SAYED-AHMED, H.; BADR, A. (2000):**  
**Molecular Phylogeny of Old World *Trifolium* (Fabaceae), based on Plastid and nuclear Markers.**  
In: *Plant Systematics and Evolution* 224 (3-4), p. 153–171. DOI: 10.1007/BF00986340.
- WILLIAMS, ANNA V.; MILLER, JOSEPH T.H.; SMALL, IAN; NEVILL, PAUL G.; BOYKIN, LAURA M. (2016):**  
**Integration of complete Chloroplast Genome Sequences with small Amplicon Datasets improves phylogenetic Resolution in *Acacia*.**  
In: *Molecular Phylogenetics and Evolution* 96, p. 1–8. DOI: 10.1016/j.ympev.2015.11.021.
- WOJCIECHOWSKI, MARTIN F. (2005):**  
***Astragalus* (Fabaceae): A molecular phylogenetic Perspective.**  
In: *Brittonia* 57 (4), p. 382–396. DOI: 10.1663/0007-196X(2005)057[0382:AFAMPP]2.0.CO;2.
- XIE, YAN-PING; MENG, YING; SUN, HANG; NIE, ZE-LONG (2016):**  
**Molecular Phylogeny of *Gueldenstaedtia* and *Tibetia* (Fabaceae) and their biogeographic Differentiation within Eastern Asia.**  
In: *Public Library of Science One* 11 (9), e0162982. DOI: 10.1371/journal.pone.0162982.
- XU, BO; WU, NING; GAO, XIN-FEN; ZHANG, LI-BING (2012):**  
**Analysis of DNA Sequences of six Chloroplast and nuclear Genes suggests Incongruence, Introgression, and incomplete Lineage Sorting in the Evolution of *Lespedeza* (Fabaceae).**  
In: *Molecular Phylogenetics and Evolution* 62 (1), p. 346–358. DOI: 10.1016/j.ympev.2011.10.007.
- YILDIZDOGAN, ZEYNEP; İKTEN, CENGİZ; MUTLU, NEDİM; TOKER, CENGİZ (2016):**  
**Genetic Relationships among the Genera *Cicer* L., *Lathyrus* L., *Lens* Mill., and *Vicia* L., together with similarity of *Lens* Taxa based on morphological and AFLP Markers.**  
In: *Turkish Journal of Botany* 40, p. 566–575. DOI: 10.3906/bot-1507-9.

YODER, JEREMY B.; BRISKINE, ROMAN; MUDGE, JOANN; FARMER, ANDREW; PAAPE, TIMOTHY; STEELE, KELLY P. ET AL. (2013):

**Phylogenetic signal Variation in the Genomes of *Medicago* (Fabaceae).**

In: Systematic Biology 62 (3), p. 424–438. DOI: 10.1093/sysbio/syt009.

YUE, XUE-KUN; YUE, JI-PEI; YANG, LI-ER; LI, ZHI-MING; SUN, HANG (2011):

**Systematics of the Genus *Salweenia* (Leguminosae) from Southwest China with Discovery of a second Species.**

In: Taxon 60 (5), p. 1366–1374.

ZHANG, MING-LI; FRITSCH, PETER W.; CRUZ, BONI C. (2009):

**Phylogeny of *Caragana* (Fabaceae) based on DNA Sequence Data from *rbcl*, *trnS-trnG*, and ITS.**

In: Molecular Phylogenetics and Evolution 50 (3), p. 547–559. DOI: 10.1016/j.ympev.2008.12.001.

ZHANG, MING-LI; KANG, YUN; ZHONG, YANG; SANDERSON, STEWART C. (2012):

**Intense uplift of the Qinghai-Tibetan Plateau triggered rapid Diversification of *Phyllobium* (Leguminosae) in the Late Cenozoic.**

In: Plant Ecology and Diversity 5 (4), p. 491–499. DOI: 10.1080/17550874.2012.727875.

ZHANG, MING-LI; WEN, ZHI-BIN; HAO, XIAO-LI; BYALT, VYACHESLAV V.; SUKHORUKOV, ALEXANDER P.; SANDERSON, STEWART C. (2015):

**Taxonomy, Phylogenetics and Biogeography of *Chesneya* (Fabaceae), Evidenced from Data of three Sequences, ITS, *trnS-trnG*, and *rbcl*.**

In: Biochemical Systematics and Ecology 63, p. 80–89. DOI: 10.1016/j.bse.2015.09.017.

ZITOUNA, NADIA; MARGHALI, SONIA; GHARBI, MAROUA; CHENNAOUI-KOURDA, HOUDA; HADDIOUI, ABDELMAJID; TRIFI-FARAH, NEILA (2013):

**Mediterranean *Hedysarum* Phylogeny by transferable Microsatellites from *Medicago*.**

In: Biochemical Systematics and Ecology 50, p. 129–135. DOI: 10.1016/j.bse.2013.03.040.

## Fabales

BELLO, MARIA ANGÉLICA; BRUNEAU, ANNE; FOREST, FÉLIX; HAWKINS, J. A. (2009):

**Elusive Relationships within Order Fabales: phylogenetic Analyses using *matK* and *rbcl* Sequence Data.**

In: Systematic Botany 34 (1), p. 102–114. DOI: 10.1600/036364409787602348.

BELLO, MARIA ANGÉLICA; RUDALL, PAULA J.; HAWKINS, JULIE A. (2012):

**Combined phylogenetic Analyses reveal interfamilial Relationships and Patterns of Floral Evolution in the Eudicot Order Fabales.**

In: Cladistics 28 (4), p. 393–421. DOI: 10.1111/j.1096-0031.2012.00392.x.

RAVI, V.; KHURANA, JITENDRA P.; TYAGI, AKHILESH K.; KHURANA, PARAMJIT (2007):

**Rosales Sister to Fabales: towards resolving the Rosid Puzzle.**

In: Molecular Phylogenetics and Evolution 44 (1), p. 488–493. DOI: 10.1016/j.ympev.2006.11.014.

## Fagaceae

CHEN, LI; LI, JIAN-QIANG; WANG, HENG-CHANG; LI, XIN-WEI; PENG, YAN-SONG (2009):

***Lithocarpus longzhouicus* comb. nov. (Fagaceae) from China: based on morphological and molecular Data.**

In: Nordic Journal of Botany 27 (2), p. 90–96. DOI: 10.1111/j.1756-1051.2008.00313.x.

DENG, MIN; JIANG, XIAO-LONG; HIPPEL, ANDREW L.; MANOS, PAUL S.; HAHN, MARLENE (2018):



**Phylogeny and Biogeography of East Asian evergreen oaks (*Quercus* Section *Cyclobalanopsis*; Fagaceae): Insights into the Cenozoic History of evergreen broad-leaved Forests in subtropical Asia.**

In: *Molecular Phylogenetics and Evolution* 119, p. 170–181. DOI: 10.1016/j.ympev.2017.11.003.

DENK, THOMAS (2003):

**Phylogeny of *Fagus* L. (Fagaceae) based on morphological Data.**

In: *Plant Systematics and Evolution* 240 (1-4), p. 55–81. DOI: 10.1007/s00606-003-0018-x.

DENK, THOMAS; GRIMM, GUIDO W. (2010):

**The Oaks of western Eurasia: Traditional Classifications and Evidence from two nuclear Markers.**

In: *Taxon* 59 (2), p. 351–366. DOI: 10.1002/tax.592002.

MANOS, PAUL S.; CANNON, CHARLES H.; OH, SANG-HUN (2008):

**Phylogenetic Relationships and taxonomic Status of the Paleoendemic Fagaceae of Western North America: Recognition of a new Genus, *Notholithocarpus*.**

In: *Madroño* 55 (3), p. 181–190. DOI: 10.3120/0024-9637-55.3.181.

MANOS, PAUL S.; DOYLE, J. J.; NIXON, K. C. (1999):

**Phylogeny, Biogeography, and Processes of molecular differentiation in *Quercus* Subgenus *Quercus* (Fagaceae).**

In: *Molecular Phylogenetics and Evolution* 12 (3), p. 333–349. DOI: 10.1006/mpev.1999.0614.

MANOS, PAUL S.; ZHOU, ZHE-KUN; CANNON, CHARLES H. (2001):

**Systematics of Fagaceae: phylogenetic Tests of reproductive Trait Evolution.**

In: *International Journal of Plant Sciences* 162 (6), p. 1361–1379.

OH, SANG-HUN; MANOS, PAUL P. (2008):

**Molecular Phylogenetics and Cupule Evolution in Fagaceae as inferred from nuclear CRABS CLAW Sequences.**

In: *Taxon* 57 (2), p. 434–451.

PEARSE, IAN S.; HIPPI, ANDREW L. (2012):

**Global Patterns of Leaf Defenses in Oak Species.**

In: *Evolution* 66 (7), p. 2272–2286. DOI: 10.1111/j.1558-5646.2012.01591.x.

SIMEONE, MARCO C.; PIREDDA, ROBERTA; PAPINI, ALESSIO; VESSELLA, FEDERICO; SCHIRONE, BARTOLOMEO (2013):

**Application of Plastid and nuclear Markers to DNA barcoding of Euro-Mediterranean Oaks (*Quercus*, Fagaceae): Problems, Prospects and phylogenetic Implications.**

In: *Botanical Journal of the Linnean Society* 172 (4), p. 478–499. DOI: 10.1111/boj.12059.

## Flagellariaceae

WEPFER, PATRICIA H.; LINDER, HANS PETER (2014):

**The Taxonomy of *Flagellaria* (Flagellariaceae).**

In: *Australian Systematic Botany* 27 (3), p. 159–179. DOI: 10.1071/SB13048.

## Fouquieriaceae

DE-NOVA, JOSÉ ARTURO; SÁNCHEZ-REYES, LUNA L.; EGUIARTE, LUIS E.; MAGALLÓN, SUSANA (2018):

**Recent Radiation and Dispersal of an ancient Lineage: the case of *Fouquieria* (Fouquieriaceae, Ericales) in North American Deserts.**

In: *Molecular Phylogenetics and Evolution* 126, p. 92–104. DOI: 10.1016/j.ympev.2018.03.026.

SCHULTHEIS, LISA M.; BALDWIN, BRUCE G. (1999):

**Molecular Phylogenetics of Fouquieriaceae: Evidence from nuclear rDNA ITS studies.**

In: American Journal of Botany 86 (4), p. 578–589. DOI: 10.2307/2656819.

## Fumariaceae

BERTRAND, YANN J.K.; SCHEEN, ANNE-CATHRINE; MARCUSSEN, THOMAS; PFEIL, BERNARD E.; SOUSA, FILIPE; OXELMAN, BENGT (2015):

**Assignment of homoeologs to parental Genomes in Allopolyploids for Species Tree Inference, with an example from *Fumaria* (Papaveraceae).**

In: Systematic Biology 64 (3), p. 448–471. DOI: 10.1093/sysbio/syv004.

DAMERVAL, CATHERINE; CITERNE, HÉLÈNE; LE GUILLOUX, MARTINE; DOMENICHINI, SÉVERINE; DUTHEIL, JUSTINE; RONSE DE CRAENE, LOUIS P.; NADOT, SOPHIE (2013):

**Asymmetric morphogenetic Cues along the transverse Plane: Shift from Disymmetry to Zygomorphy in the Flower of Fumarioideae.**

In: American Journal of Botany 100 (2), p. 391–402. DOI: 10.3732/ajb.1200376.

PÉREZ-GUTIÉRREZ, MIGUEL A.; ROMERO-GARCÍA, ANA T.; FERNÁNDEZ, M. CARMEN; BLANCA, GABRIEL; SALINAS-BONILLO, MARÍA J.; SUÁREZ-SANTIAGO, VÍCTOR N. (2015):

**Evolutionary History of fumitories (Subfamily Fumarioideae, Papaveraceae): An old Story shaped by the main geological and climatic Events in the Northern Hemisphere.**

In: Molecular Phylogenetics and Evolution 88, p. 75–92. DOI: 10.1016/j.ympev.2015.03.026.

PÉREZ-GUTIÉRREZ, MIGUEL A.; ROMERO-GARCÍA, ANA T.; SALINAS, MARÍA J.; BLANCA, GABRIEL; FERNÁNDEZ, M. CARMEN; SUÁREZ-SANTIAGO, VÍCTOR N. (2012):

**Phylogeny of the Tribe Fumarieae (Papaveraceae s.l.) based on Chloroplast and nuclear DNA Sequences: Evolutionary and biogeographic Implications.**

In: American Journal of Botany 99 (3), p. 517–528. DOI: 10.3732/ajb.1100374.

SALINAS, MARÍA J.; RUZ-REJN, C.; MORALES, C.; RUZ-REJN, M.; ROMERO, A. T.; BLANCA, GABRIEL ET AL. (2003):  
**Contribution to the Taxonomy and Phylogeny of *Sarcocapnos* DC. (Fumariaceae).**

In: Plant Systematics and Evolution 237 (3-4), p. 153–164. DOI: 10.1007/s00606-002-0260-7.

SAUQUET, HERVÉ; CARRIVE, LAETITIA; POUILLAIN, NOÉLIE; SANNIER, JULIE; DAMERVAL, CATHERINE; NADOT, SOPHIE (2015):

**Zygomorphy evolved from Disymmetry in Fumarioideae (Papaveraceae, Ranunculales): new Evidence from an expanded molecular phylogenetic Framework.**

In: Annals of Botany 115 (6), p. 895–914. DOI: 10.1093/aob/mcv020.

## Garryaceae

BURGE, DYLAN O. (2011):

**Molecular Phylogenetics of *Garrya* (Garryaceae).**

In: Madroño 58 (4), p. 249–255. DOI: 10.3120/0024-9637-58.4.249.

## Gelsemiaceae

JIAO, ZHEN; JIANHUA, LI (2007):

**Phylogeny of Intercontinental Disjunct Gelsemiaceae inferred from Chloroplast and Nuclear DNA Sequences.**

In: Systematic Botany 32 (3), p. 617–627.

STRUWE, LENA; SOZA, VALERIE L.; MANICKAM, SUGUMARAN; OLMSTEAD, RICHARD G. (2014):

**Gelsemiaceae (Gentianales) expanded to include the enigmatic Asian Genus *Pteleocarpa*.**

In: Botanical Journal of the Linnean Society 175, p. 482–496.

## Gentianaceae

CALIÓ, MARIA FERNANDA; LEPIS, KATHERINE B.; PIRANI, JOSÉ RUBENS; STRUWE, LENA (2017):

**Phylogeny of Helieae (Gentianaceae): Resolving taxonomic Chaos in a Neotropical Clade.**

In: *Molecular Phylogenetics and Evolution* 106, p. 192–208. DOI: 10.1016/j.ympev.2016.09.013.

CALIÓ, MARIA FERNANDA; PIRANI, JOSÉ RUBENS; STRUWE, LENA (2008):

**Morphology-Based Phylogeny and Revision of *Prepusa* and *Senaea* (Gentianaceae: Helieae) —Rare Endemics from Eastern Brazil.**

In: *Kew Bulletin* 63 (2), p. 169–191.

CHASSOT, PHILIPPE; NEMOMISSA, SILESHI; YUAN, YONG-MING; KÜPFER, PHILIPPE (2001):

**High Paraphyly of *Swertia* L. (Gentianaceae) in the Gentianell-lineage as revealed by nuclear and Chloroplast DNA Sequence Variation.**

In: *Plant Systematics and Evolution* 229, p. 1–21.

CHEN, SHENG-YUN; SHI-LONG, CHEN; TAO, XIA; YU-JIN, WANG (2005):

**Phylogeny of *Metagentiana* and related Genera (Gentianaceae) inferred from nuclear ribosomal ITS Sequences.**

In: *Acta Phytotaxonomica Sinica* 43 (6), p. 491–502. DOI: 10.1360/aps040136.

CHEN, SHENG-YUN; XIA, TAO; WANG, YUJIN; LIU, JIAN-QUAN; CHEN, SHI-LONG (2005):

**Molecular Systematics and Biogeography of *Crawfurdia*, *Metagentiana* and *Tripterospermum* (Gentianaceae) based on nuclear ribosomal and Plastid DNA Sequences.**

In: *Annals of Botany* 96 (3), p. 413–424. DOI: 10.1093/aob/mci188.

CHRISTE, C.; CAETANO, S.; AESCHIMANN, D.; KROPF, MATTHIAS; DIADEMA, K.; NACIRI, Y. (2014):

**The intraspecific genetic variability of siliceous and calcareous *Gentiana* Species is shaped by contrasting demographic and Re-Colonization Processes.**

In: *Molecular Phylogenetics and Evolution* 70, p. 323–336. DOI: 10.1016/j.ympev.2013.09.022.

FAVRE, ADRIEN; MATUSZAK, SABINE; SUN, HANG; LIU, ENDE; YUAN, YONG-MING; MÜLLNER-RIEHL, ALEXANDRA N. (2014):

**Two new Genera of Gentianinae (Gentianaceae): *Sinogentiana* and *Kuepferia* supported by molecular phylogenetic Evidence.**

In: *Taxon* 63 (2), p. 342–354. DOI: 10.12705/632.5.

FAVRE, ADRIEN; YUAN, YONG-MING; KÜPFER, PHILIPPE; ALVAREZ, NADIR (2010):

**Phylogeny of Subtribe Gentianinae (Gentianaceae): Biogeographic Inferences despite limitations in temporal calibration Points.**

In: *Taxon* 59 (6), p. 1701–1711.

FRASIER, CYNTHIA (2008):

**Amazonian Lowland, white Sand areas as ancestral Regions for South American Biodiversity: Biogeographic and phylogenetic Patterns in *Potalia* (Angiospermae: Gentianaceae).**

In: *Organisms Diversity and Evolution* 8 (1), p. 44–57. DOI: 10.1016/j.ode.2006.11.003.

HAGEN, K. BERNHARD VON; KADEREIT, JOACHIM W. (2001):

**The Phylogeny of (Gentianaceae) and its Colonization of the Southern Hemisphere as revealed by nuclear and Chloroplast DNA Sequence Variation.**

In: *Organisms Diversity and Evolution* 1 (1), p. 61–79. DOI: 10.1078/1439-6092-00005.

- KISSLING, JONATHAN; BUERKI, SVEN; MANSION, GUILHEM (2009):**  
***Klackenbergia* (Gentianaceae - Exaceae), a new endemic Genus from Madagascar.**  
In: *Taxon* 58 (3), p. 907–912.
- KISSLING, JONATHAN; YUAN, YONG-MING; KÜPFER, PHILIPPE; MANSION, GUILHEM (2009):**  
**The polyphyletic Genus *Sebaea* (Gentianaceae): a Step forward in Understanding the morphological and karyological Evolution of the Exaceae.**  
In: *Molecular Phylogenetics and Evolution* 53 (3), p. 734–748. DOI: 10.1016/j.ympev.2009.07.025.
- MANSION, GUILHEM (2004):**  
**A new Classification of the polyphyletic Genus *Centaurium* Hill (Chironiinae, Gentianaceae): Description of the New World endemic *Zeltnera*, and Reinstatement of *Gyrandra* Griseb. and *Schenkia* Griseb.**  
In: *Taxon* 53 (3), p. 719–740.
- MANSION, GUILHEM; STRUWE, LENA (2004):**  
**Generic Delimitation and phylogenetic Relationships within the Subtribe Chironiinae (Chironieae: Gentianaceae), with special Reference to *Centaurium*: Evidence from nrDNA and cpDNA Sequences.**  
In: *Molecular Phylogenetics and Evolution* 32 (3), p. 951–977. DOI: 10.1016/j.ympev.2004.03.016.
- MANSION, GUILHEM; ZELTNER, LOUIS (2004):**  
**Phylogenetic Relationships within the New World endemic *Zeltnera* (Gentianaceae:chironiinae) inferred from molecular and Karyological Data.**  
In: *American Journal of Botany* 91 (12), p. 2069–2086.
- MANSION, GUILHEM; ZELTNER, LOUIS; BRETAGNOLLE, FRANÇOIS (2005):**  
**Phylogenetic Patterns and polyploid Evolution within the Mediterranean Genus *Centaurium* (Gentianaceae - Chironieae).**  
In: *Taxon* 54 (4), p. 931–950.
- MATHEWS, KATHERINE G.; DUNNE, NIALL; YORK, EMILY; STRUWE, LENA (2009):**  
**A phylogenetic Analysis and taxonomic Revision of *Bartonia* (Gentianaceae: Gentianeae), based on molecular and morphological Evidence.**  
In: *Systematic Botany* 34 (1), p. 162–172. DOI: 10.1600/036364409787602320.
- MATUSZAK, SABINE; FAVRE, ADRIEN; SCHNITZLER, JAN; MÜLLNER-RIEHL, ALEXANDRA N. (2016):**  
**Key innovations and climatic niche Divergence as drivers of Diversification in subtropical Gentianinae in southeastern and eastern Asia.**  
In: *American Journal of Botany* 103 (5), p. 899–911. DOI: 10.3732/ajb.1500352.
- MERCKX, VINCENT S.F.T.; KISSLING, JONATHAN; HENTRICH, HEIKO; JANSSENS, STEVEN B.; MENNES, CONSTANTIJN B.; SPECHT, CHELSEA D.; SMETS, ERIK F. (2013):**  
**Phylogenetic Relationships of the mycoheterotrophic Genus *Voyria* and the Implications for the biogeographic History of Gentianaceae.**  
In: *American Journal of Botany* 100 (4), p. 712–721. DOI: 10.3732/ajb.1200330.
- MOLINA, JEANMAIRE E.; STRUWE, LENA (2009):**  
**Utility of secondary Structure in phylogenetic Reconstructions Using nrDNA ITS Sequences - an Example from Potalieae (Gentianaceae: Asteridae).**  
In: *Systematic Botany* 34 (2), p. 414–428. DOI: 10.1600/036364409788606424.
- STRUWE, LENA; ALBERT, VICTOR A.; CALIÁ, FERNANDA M.; FRASIER, CYNTHIA; LEPIS, KATHERINE B.; MATHEWS, KATHERINE G.; GRANT, JASON R. (2009):**

**Evolutionary Patterns in Neotropical Helieae (Gentianaceae): Evidence from Morphology, Chloroplast and nuclear DNA Sequences.**

In: *Taxon* 58 (2), p. 479–499.

SUGUMARAN, M.; WONG, KHOON MENG (2012):

**Studies in Malesian Gentianaceae I: *Fagraea* sensu lato-complex Genus or several Genera? A molecular phylogenetic study.**

In: *Gardens' Bulletin Singapore* 64 (2), p. 301–332.

SUGUMARAN, M.; WONG, KHOON MENG (2014):

**Studies in Malesian Gentianaceae VI. A Revision of *Utania* in the Malay Peninsula with two new Species.**

In: *Plant Ecology and Evolution* 147 (2), p. 213–223. DOI: 10.5091/plecevo.2014.971.

WONG, KHOON MENG (2012):

**Studies in Malesian Gentianaceae IV: A Revision of *Picrophloeus*.**

In: *Gardens' Bulletin Singapore* 64 (2), p. 511–522.

WONG, KHOON MENG; SUGUMARAN, M. (2012):

**Studies in Malesian Gentianaceae II: A taxonomic Framework for the *Fagraea*-complex, including the new Genus *Limahlania*.**

In: *Gardens' Bulletin Singapore* 64 (2), p. 481–495.

WONG, KHOON MENG; SUGUMARAN, M. (2012):

**Studies in Malesian Gentianaceae III: *Cyrtophyllum* reapplied to the *Fagraea fragrans* Alliance.**

In: *Gardens' Bulletin Singapore* 64 (2), p. 497–510.

WONG, KHOON MENG; SUGUMARAN, M.; SUGAU, J. B. (2013):

**Studies in Malesian Gentianaceae V. the *Fagraea* complex in Borneo: new generic assignments and Recombinations.**

In: *Gardens' Bulletin Singapore* 65 (2), p. 235–239.

YUAN, YONG-MING; WOHLHAUSER, SÉBASTIEN; MÖLLER, MICHAEL; CHASSOT, PHILIPPE; MANSION, GUILHEM; GRANT, JASON R. ET AL. (2003):

**Monophyly and Relationships of the Tribe Exaceae (Gentianaceae) inferred from nuclear ribosomal and Chloroplast DNA Sequences.**

In: *Molecular Phylogenetics and Evolution* 28 (3), p. 500–517. DOI: 10.1016/S1055-7903(03)00068-X.

YUAN, YONG-MING; WOHLHAUSER, SÉBASTIEN; MÖLLER, MICHAEL; KLACKENBERG, JENS; CALLMANDER, MARTIN W.; KÜPFER, PHILIPPE (2005):

**Phylogeny and Biogeography of *Exacum* (Gentianaceae): a disjunctive Distribution in the Indian Ocean Basin resulted from long Distance Dispersal and extensive Radiation.**

In: *Systematic Biology* 54 (1), p. 21–34. DOI: 10.1080/10635150590905867.

ZHANG, XIAO-LAN; WANG, YU-JIN; GE, XUE-JUN; YUAN, YONG-MING; YANG, HUI-LING; LIU, JIAN-QUAN (2009):

**Molecular Phylogeny and Biogeography of *Gentiana* Sect. *Cruciata* (Gentianaceae) based on four Chloroplast DNA Datasets.**

In: *Taxon* 58 (3), p. 862–870.

## Geraniaceae

AEDO, CARLOS; BARBERÁ, PATRICIA; BUIRA, ANTONI (2016):

**Taxonomic Revision of *Geranium* Sect. *Trilopha* (Geraniaceae).**

- In: Systematic Botany 41 (2), p. 354–377. DOI: 10.1600/036364416X691812.
- AEDO, CARLOS; GARCÍA, MIGUEL Á.; ALARCÓN, MARÍA LUISA; ALDASORO, JUAN JOSÉ; NAVARRO, CARMEN (2007):  
Taxonomic Revision of *Geranium* SubSect. *Mediterranea* (Geraniaceae).**  
In: Systematic Botany 32 (1), p. 93–128.
- BAKKER, FREEK T.; CULHAM, ALASTAIR; HETTIARACHI, PRIYANI; TOULOU MENIDOU, TASOULA; GIBBY, MARY (2004):  
Phylogeny of *Pelargonium* (Geraniaceae) based on DNA Sequences from three  
Genomes.**  
In: Taxon 53 (1), p. 17–31. DOI: 10.2307/4135669.
- BAKKER, FREEK T.; CULHAM, ALASTAIR; PANKHURST, CLIVE E.; GIBBY, MARY (2000):  
Mitochondrial and Chloroplast DNA-based Phylogeny of *Pelargonium* (Geraniaceae).**  
In: American Journal of Botany 87 (5), p. 727–734. DOI: 10.2307/2656859.
- FIZ, OMAR; VARGAS, PABLO; ALARCÓN, MARÍA LUISA; ALDASORO, JUAN JOSÉ (2006):  
Phylogenetic Relationships and Evolution in *Erodium* (Geraniaceae) based on trnL-  
trnF Sequences.**  
In: Systematic Botany 41 (4), p. 739–763.
- FIZ, OMAR; VARGAS, PABLO; ALARCÓN, MARISA; AEDO, CARLOS; GARCÍA, JOSÉ LUIS; ALDASORO, JUAN JOSÉ (2008):  
Phylogeny and Historical Biogeography of Geraniaceae in Relation to Climate  
Changes and Pollination Ecology.**  
In: Systematic Botany 33 (2), p. 326–342. DOI: 10.1600/036364408784571482.
- FIZ-PALACIOS, OMAR; VARGAS, PABLO; VILA, ROGER; PAPADOPULOS, ALEXANDER P. T.; ALDASORO, JUAN JOSÉ (2010):  
The uneven Phylogeny and Biogeography of *Erodium* (Geraniaceae): Radiations in  
the Mediterranean and recent recurrent intercontinental colonization.**  
In: Annals of Botany 106 (6), p. 871–884. DOI: 10.1093/aob/mcq184.
- JAMES, C. M.; GIBBY, MARY; BARRETT, J. A. (2004):  
Molecular studies in *Pelargonium* (Geraniaceae). A taxonomic Appraisal of Section  
*Ciconium* and the Origin of the 'Zonal' and 'Ivy-leaved' Cultivars.**  
In: Plant Systematics and Evolution 243 (3-4), p. 131–146. DOI: 10.1007/s00606-003-0074-2.
- JONES, CYNTHIA S.; BAKKER, FREEK T.; SCHLICHTING, CARL D.; NICOTRA, ADRIENNE B. (2009):  
Leaf shape Evolution in the South African Genus *Pelargonium* L'Her. (Geraniaceae).**  
In: Evolution 63 (2), p. 479–497. DOI: 10.1111/j.1558-5646.2008.00552.x.
- MARCUSSEN, THOMAS; MESEGUER, ANDREA SÁNCHEZ (2017):  
Species-level Phylogeny, Fruit Evolution and Diversification History of *Geranium*  
(Geraniaceae).**  
In: Molecular Phylogenetics and Evolution 110, p. 134–149. DOI: 10.1016/j.ympev.2017.03.012.
- MITCHELL, ANTHONY D.; HEENAN, PETER B.; PATERSON, A. M. (2009):  
Phylogenetic Relationships of *Geranium* Species indigenous to New Zealand.**  
In: New Zealand Journal of Botany 47 (1), p. 21–31. DOI: 10.1080/00288250909509789.
- ROESCHENBLECK, JOACHIM; ALBERS, FOCKE; MÜLLER, KAI F.; WEINL, STEFAN; KUDLA, JÖRG (2014):  
Phylogenetics, Character Evolution and a Subgeneric Revision of the Genus  
*Pelargonium* (Geraniaceae).**  
In: Phytotaxa 159 (2), p. 31. DOI: 10.11646/phytotaxa.159.2.1.
- TOULOU MENIDOU, TASOULA; BAKKER, FREEK T.; ALBERS, F. (2007):  
The Phylogeny of *Monsonia* L. (Geraniaceae).**  
In: Plant Systematics and Evolution 264 (1-2), p. 1–14. DOI: 10.1007/s00606-006-0490-1.

WENG, MAO-LUN; RUHLMAN, TRACEY A.; GIBBY, MARY; JANSEN, ROBERT K. (2012):

**Phylogeny, rate Variation, and Genome size Evolution of *Pelargonium* (Geraniaceae).**

In: Molecular Phylogenetics and Evolution 64 (3), p. 654–670. DOI: 10.1016/j.ympev.2012.05.026.

## Gerrardinaceae

ALFORD, MAC H. (2006):

**Gerrardinaceae: a new Family of African Flowering Plants unresolved among Brassicales, Huerteales, Malvales, and Sapindales.**

In: Taxon 55 (4), p. 959–964. DOI: 10.2307/25065689.

## Gesneriaceae

ANDERSON, BENJAMIN M.; MIDDLETON, DAVID J. (2013):

**A Revision of *Rhynchoechum* Blume (Gesneriaceae).**

In: Edinburgh Journal of Botany 70 (01), p. 121–176. DOI: 10.1017/S0960428612000376.

ARAÚJO, ANDRÉA ONOFRE DE; CHAUTEEMS, ALAIN (2015):

**A new Species of *Sinningia* (Gesneriaceae) and additional floristic Data from Serra dos Carajás, Pará, Brazil.**

In: Phytotaxa 227 (2), p. 158. DOI: 10.11646/phytotaxa.227.2.5.

ARAÚJO, ANDRÉA ONOFRE DE; CHAUTEEMS, ALAIN; CARDOSO-GUSTAVSON, POLIANA; SOUZA, VINICIUS CASTRO; PERRET, MATHIEU (2016):

**Taxonomic Revision and phylogenetic Position of the Brazilian Endemic Genus *Sphaerorrhiza* (Sphaerorrhizinae, Gesneriaceae) including two new Species.**

In: Systematic Botany 41 (3), p. 651–664. DOI: 10.1600/036364416X692352.

BERGER, ANDREAS; CLARK, JOHN L.; WEBER, ANTON (2015):

***Besleria macropoda* (Gesneriaceae): Lectotypification, Distribution, functional Epiphyllly and discordant Fruit Morphology of a rare Costa Rican endemic.**

In: Phytotaxa 233 (2), p. 139–152. DOI: 10.11646/phytotaxa.233.2.2.

BRANSGROVE, K.; MIDDLETON, DAVID J. (2015):

**A Revision of *Epithema* (Gesneriaceae).**

In: Gardens' Bulletin Singapore 67 (01), p. 159. DOI: 10.3850/S2382581215000174.

CHRISTIE, FRIEDA; BARBER, S.; MÖLLER, MICHAEL (2012):

**New Chromosome Counts in Old World Gesneriaceae: Numbers for Species hitherto regarded as *Chirita*, and their Systematic and evolutionary Significance.**

In: Edinburgh Journal of Botany 69 (02), p. 323–345. DOI: 10.1017/S0960428612000169.

CLARK, JOHN L. (2012):

***Gasteranthus diverticularis*, a new Species of Gesneriaceae from Southern Ecuador.**

In: Brittonia 64 (1), p. 1–5.

CLARK, JOHN L.; FUNKE, MINDIE M.; DUFFY, AARON M.; SMITH, JAMES F. (2012):

**Phylogeny of a Neotropical Clade in the Gesneriaceae: More Tales of Convergent Evolution.**

In: International Journal of Plant Sciences 173 (8), p. 894–916. DOI: 10.1086/667229.

CLARK, JOHN L.; HERENDEEN, PATRICK S.; SKOG, LAURENCE E.; ZIMMER, ELIZABETH A. (2006):

**Phylogenetic Relationships and generic boundaries in the Epischieae (Gesneriaceae) inferred from nuclear, chloroplast, and morphological Data.**

In: Taxon 55 (2), p. 313–336. DOI: 10.2307/25065580.

CLARK, JOHN L.; NEILL, DAVID A.; WEBER, ANTON; GRUHN, JENNIFER A.; KATAN, TUNTIK (2010):

***Shuaria* (Gesneriaceae), an Arborescent new Genus from the Cordillera del Cóndor and Amazonian Ecuador.**

In: Systematic Botany 35 (3), p. 662–674. DOI: 10.1600/036364410792495917.

**CLARK, JOHN L.; ROALSON, ERIC H.; PRITCHARD, ROSS A.; COLEMAN, CASSANDRA L.; TEOH, VIEW-HUNE; MATOS, JESÚS (2011):**

**Independent Origin of Radial Floral Symmetry in the Gloxinieae (Gesnerioideae: Gesneriaceae) is supported by the Rediscovery of *Phinaea pulchella* in Cuba.**

In: Systematic Botany 36 (3), p. 757–767. DOI: 10.1600/036364411X583709.

**CLARK, JOHN R.; WAGNER, WARREN L.; ROALSON, ERIC H. (2009):**

**Patterns of Diversification and ancestral range Reconstruction in the southeast Asian-Pacific Angiosperm Lineage *Cyrtandra* (Gesneriaceae).**

In: Molecular Phylogenetics and Evolution 53 (3), p. 982–994. DOI: 10.1016/j.ympev.2009.09.002.

**CRONK, QUENTIN C.B.; KIEHN, MICHAEL; WAGNER, WARREN L.; SMITH, JAMES F. (2005):**

**Evolution of *Cyrtandra* (Gesneriaceae) in the Pacific Ocean: the Origin of a Supertramp Clade.**

In: American Journal of Botany 92 (6), p. 1017–1024.

**DENDUANGBORIPANT, J.; MENDUM, M.; CRONK, QUENTIN C.B. (2001):**

**Evolution in *Aeschynanthus* (Gesneriaceae) inferred from ITS Sequences.**

In: Plant Systematics and Evolution 228 (3-4), p. 181–197. DOI: 10.1007/s006060170028.

**FERREIRA, GABRIEL E.; CHAUTEMS, ALAIN; HOPKINS, MICHAEL J. G.; PERRET, MATHIEU (2016):**

**Independent Evolution of pouched flowers in the Amazon is supported by the Discovery of a new Species of *Lesia* (Gesneriaceae) from Serra do Aracá Tepui in Brazil.**

In: Plant Systematics and Evolution 302 (8), p. 1109–1119. DOI: 10.1007/s00606-016-1320-8.

**FREIBERG, MARTIN (1996):**

**The Gesneriad Flora of the Los Cedros Biological Reserve, Northwest Ecuador, Part 1: Four new Species in *Gasteranthus* (Gesneriaceae).**

In: Phytion (Horn, Austria) 36 (2), p. 303–309.

**FREIBERG, MARTIN (1997):**

**The Gesneriad Flora of the Los Cedros Biological Reserve, Northwest Ecuador, Part 2: new Species in *Alloplectus*, *Dalbergaria*, *Paradrymonia*, and *Pentadenia* (Gesneriaceae).**

In: Phytion (Horn, Austria) 37 (1), p. 133–140.

**FREIBERG, MARTIN (1998):**

**Two remarkable new Species of *Gasteranthus* (Gesneriaceae) from Central Ecuador.**

In: Phytion (Horn, Austria) 37 (2), p. 345–351.

**FREIBERG, MARTIN (2000):**

**Three new Species of *Gasteranthus* (Gesneriaceae) from Ecuador.**

In: Brittonia 52, p. 227–232.

**KOKUBUGATA, GORO; HIRAYAMA, YUMIKO; PENG, CHING-I.; YOKOTA, MASATSUGU; MÖLLER, MICHAEL (2011):**

**Phytogeographic aspects of *Lysionotus pauciflorus* sensu lato (Gesneriaceae) in the China, Japan and Taiwan Regions: phylogenetic and morphological Relationships and taxonomic Consequences.**

In: Plant Systematics and Evolution 292 (3-4), p. 177–188. DOI: 10.1007/s00606-010-0410-2.



- LI, JIA-MEI; WANG, YIN-ZHENG (2007):  
**Phylogenetic Reconstruction among Species of *Chiritopsis* and *Chirita* Sect. *Gibbosaccus* (Gesneriaceae) based on nrDNA ITS and cpDNA trnL-F Sequences.**  
 In: Systematic Botany 32 (4), p. 888–898.
- LINDQVIST, CHARLOTTE; ALBERT, VICTOR A. (1999):  
**Phylogeny and conservation of African violets (*Saintpaulia*: Gesneriaceae): new findings based on nuclear ribosomal 5s non-transcribed Spacer Sequences.**  
 In: Kew Bulletin 54, p. 363–377.
- MAYER, VERONIKA; MÖLLER, MICHAEL; PERRET, MATHIEU; WEBER, ANTON (2003):  
**Phylogenetic Position and generic differentiation of Epithemateae (Gesneriaceae) inferred from Plastid DNA Sequence Data.**  
 In: American Journal of Botany 90 (2), p. 321–329. DOI: 10.3732/ajb.90.2.321.
- MIDDLETON, DAVID J.; MÖLLER, MICHAEL (2012):  
***Tribounia*, a new Genus of Gesneriaceae from Thailand.**  
 In: Taxon 61 (6), p. 1286–1295. DOI: 10.1002/tax.616009.
- MIDDLETON, DAVID J.; NISHII, KANAE; PUGLISI, CARMEN; FORREST, LAURA L.; MÖLLER, MICHAEL (2015):  
***Chayamaritia* (Gesneriaceae: Didymocarpoideae), a new Genus from Southeast Asia.**  
 In: Plant Systematics and Evolution 301 (7), p. 1947–1966. DOI: 10.1007/s00606-015-1213-2.
- MIDDLETON, DAVID J.; WEBER, ANTON; YAO, T. L.; SONTAG, SUSANNE; MÖLLER, MICHAEL (2013):  
**The current Status of the Species hitherto assigned to *Henckelia* (Gesneriaceae).**  
 In: Edinburgh Journal of Botany 70 (03), p. 385–404. DOI: 10.1017/S0960428613000127.
- MÖLLER, MICHAEL; FORREST, ALAN; WEI, YI-GANG; WEBER, ANTON (2011):  
**A molecular phylogenetic assessment of the advanced Asiatic and Malesian didymocarpoid Gesneriaceae with focus on non-monophyletic and monotypic Genera.**  
 In: Plant Systematics and Evolution 292 (3-4), p. 223–248. DOI: 10.1007/s00606-010-0413-z.
- MÖLLER, MICHAEL; KOKUBUGATA, GORO; JONG, KWITON (2008):  
**Aspects of Genome Evolution in Gesneriaceae: Patterns of 45S-nrDNA Site Evolution based on Evidence from Fluorescent in Situ Hybridization (Fish).**  
 In: International Journal of Plant Sciences 169 (5), p. 667–676. DOI: 10.1086/533609.
- MÖLLER, MICHAEL; NISHII, KANAE; ATKINS, H. J.; KONG, H. H.; KANG, MING; WEI, Y. G. ET AL. (2016):  
**An Expansion of the Genus *Deinostigma* (Gesneriaceae).**  
 In: Gardens' Bulletin Singapore 68 (01), p. 145. DOI: 10.3850/S2382581216000119.
- MÖLLER, MICHAEL; PFOSSER, MARTIN; JANG, CHANG-GEE; MAYER, VERONIKA; CLARK, ALEXANDRA; HOLLINGSWORTH, MICHELLE L. ET AL. (2009):  
**A preliminary Phylogeny of the 'Didymocarpoid Gesneriaceae' based on three molecular Data sets: Incongruence with available tribal Classifications.**  
 In: American Journal of Botany 96 (5), p. 989–1010. DOI: 10.3732/ajb.0800291.
- MORA, M. MARCELA; CLARK, JOHN L. (2016):  
**Molecular Phylogeny of the Neotropical Genus *Paradrymonia* (Gesneriaceae), Reexamination of Generic Concepts and the Resurrection of *Trichodrymonia* and *Centrosolenia*.**  
 In: Systematic Botany 41 (1), p. 82–104. DOI: 10.1600/036364416X690561.
- NING, ZU-LIN; PAN, BO; WEN, FANG; KANG, MING; ZHUANG, XUE-YING (2016):

***Primulina yingdeensis*, a new Species from Guangdong, China, and *P. rosulata*, a new Combination (Gesneriaceae), based on morphological and molecular Evidence.**

In: Willdenowia 46 (3), p. 399–409. DOI: 10.3372/wi.46.46308.

**NISHII, KANAE; HUGHES, MARK; BRIGGS, MARIE; HASTON, ELSPETH M.; CHRISTIE, FRIEDA; DEVILLIERS, MARGARET J. ET AL. (2015):**

***Streptocarpus* redefined to include all Afro-Malagasy Gesneriaceae: molecular Phylogenies prove congruent with geographical Distribution and basic Chromosome Numbers and uncover remarkable morphological Homoplasies.**

In: Taxon 64 (6), p. 1243–1274. DOI: 10.12705/646.8.

**PERRET, MATHIEU; CHAUTEMS, ALAIN; ARAUJO, ANDRÉA ONOFRE DE; SALAMIN, NICOLAS (2013):**

**Temporal and spatial Origin of Gesneriaceae in the New World inferred from Plastid DNA Sequences.**

In: Botanical Journal of the Linnean Society 171, p. 61–79.

**PERRET, MATHIEU; CHAUTEMS, ALAIN; SPICHIGER, RODOLPHE (2006):**

**Dispersal-vicariance Analyses in the Tribe Sinningieae (Gesneriaceae): A Clue To Understanding Biogeographical History of the Brazilian Atlantic Forest.**

In: Annals of the Missouri Botanical Garden 93 (2), p. 340–358. DOI: 10.3417/0026-6493(2006)93[340:DAITTS]2.0.CO;2.

**PERRET, MATHIEU; CHAUTEMS, ALAIN; SPICHIGER, RODOLPHE; BARRACLOUGH, TIMOTHY G.; SAVOLAINEN, VINCENT (2007):**

**The geographical Pattern of Speciation and Floral Diversification in the Neotropics: the Tribe Sinningieae (Gesneriaceae) as a Case Study.**

In: Evolution 61 (7), p. 1641–1660. DOI: 10.1111/j.1558-5646.2007.00136.x.

**PERRET, MATHIEU; CHAUTEMS, ALAIN; SPICHIGER, RODOLPHE; KITE, GEOFFREY C.; SAVOLAINEN, VINCENT (2003):**

**Systematics and Evolution of Tribe Sinningieae (Gesneriaceae): Evidence from phylogenetic Analyses of six Plastid DNA Regions and Nuclear NCpqs.**

In: American Journal of Botany 90 (3), p. 445–460.

**PETROVA, GALYA; MOYANKOVA, DANIELA; NISHII, KANAE; FORREST, LAURA L.; TSIRIPIDIS, IOANNIS; DROUZAS, ANDREAS D. ET AL. (2015):**

**The European Paleoendemic *Haberlea rhodopensis* (Gesneriaceae) has an Oligocene Origin and a Pleistocene Diversification and occurs in a long-persisting Refugial Area in Southeastern Europe.**

In: International Journal of Plant Sciences 176 (6), p. 499–514. DOI: 10.1086/681990.

**PILLON, YOHAN; JOHANSEN, JENNIFER B.; SAKISHIMA, TOMOKO; ROALSON, ERIC H.; PRICE, DONALD K.; STACY, ELIZABETH A. (2013):**

**Gene discordance in phylogenomics of recent plant Radiations, an example from Hawaiian *Cyrtandra* (Gesneriaceae).**

In: Molecular Phylogenetics and Evolution 69 (1), p. 293–298. DOI: 10.1016/j.ympev.2013.05.003.

**PUGLISI, CARMEN; MIDDLETON, DAVID J.; TRIBOUN, PRAMOTE; MÖLLER, MICHAEL (2011):**

**New Insights into the Relationships between *Paraboea*, *Trisepalum*, and *Phylloboea* (Gesneriaceae) and their taxonomic consequences.**

In: Taxon 60 (6), p. 1693–1702. DOI: 10.1002/tax.606014.

**PUGLISI, CARMEN; YAO, TZE LEONG; MILNE, RICHARD IAN; MÖLLER, MICHAEL; MIDDLETON, DAVID J. (2016):**

**Generic Recircumscription in the Loxocarpinae (Gesneriaceae), as inferred by phylogenetic and morphological Data.**

In: *Taxon* 65 (2), p. 277–292. DOI: 10.12705/652.5.

QIU, ZHI-JING; WANG, XIAO-LING; LIU, ZHENG-YU; YANG, JIAN-FEN (2012):

**Cytological and phylogenetic Study of *Petrocosmea hexiensis* (Gesneriaceae), a new Species from Chongqing, China.**

In: *Phytotaxa* 74, p. 30–38.

ROALSON, ERIC H.; BOGGAN, JOHN K.; SKOG, LAURENCE E.; ZIMMER, ELIZABETH A. (2005):

**Untangling Gloxinieae (Gesneriaceae). I. phylogenetic Patterns and generic Boundaries inferred from nuclear, chloroplast, and morphological cladistic Datasets.**

In: *Taxon* 54 (2), p. 389–410. DOI: 10.2307/25065368.

ROALSON, ERIC H.; SKOG, LAURENCE E.; ZIMMER, ELIZABETH A. (2003):

**Phylogenetic Relationships and the Diversification of Floral Form in *Achimenes* (Gesneriaceae).**

In: *Systematic Botany* 28 (3), p. 593–608.

ROALSON, ERIC H.; SKOG, LAURENCE E.; ZIMMER, ELIZABETH A. (2008):

**Untangling Gloxinieae (Gesneriaceae). II. Reconstructing Biogeographic Patterns and Estimating Divergence Times among New World Continental and Island Lineages.**

In: *Systematic Botany* 33 (1), p. 159–175.

SCHULTE, LACIE J.; CLARK, JOHN L.; NOVAK, STEPHEN J.; JEFFRIES, SHANDRA K.; SMITH, JAMES F. (2015):

**Speciation within *Columnnea* Section *Angustiflora* (Gesneriaceae): Islands, pollinators and climate.**

In: *Molecular Phylogenetics and Evolution* 84, p. 125–144. DOI: 10.1016/j.ympev.2014.12.008.

SERRANO-SERRANO, MARTHA LILIANA; PERRET, MATHIEU; GUIGNARD, MAÏTÉ; CHAUTEMS, ALAIN; SILVESTRO, DANIELE; SALAMIN, NICOLAS (2015):

**Decoupled Evolution of Floral traits and climatic Preferences in a Clade of Neotropical Gesneriaceae.**

In: *BMC Evolutionary Biology* 15, p. 247. DOI: 10.1186/s12862-015-0527-6.

SMITH, JAMES F. (2000):

**A phylogenetic Analysis of Tribes Beslerieae and Napeantheae (Gesneriaceae) and Evolution of Fruit Types: Parsimony and Maximum Likelihood Analyses of *ndhF* Sequences.**

In: *Systematic Botany* 25 (1), p. 72. DOI: 10.2307/2666674.

SMITH, JAMES F. (2000):

**Phylogenetic Resolution within the Tribe Episcieae (Gesneriaceae): Congruence of ITS and *Ndhf* Sequences from Parsimony and Maximum-likelihood Analyses.**

In: *American Journal of Botany* 87 (6), p. 883–897.

SMITH, JAMES F.; CLARK, JOHN L. (2013):

**Molecular phylogenetic Analyses reveal undiscovered monospecific Genera in the Tribe Episcieae (Gesneriaceae).**

In: *Systematic Botany* 38 (2), p. 451–463. DOI: 10.1600/036364413X666723.

SMITH, JAMES F.; CLARK, JOHN L.; AMAYA-MÁRQUEZ, MARISOL; MARÍN-GÓMEZ, OSCAR H. (2017):

**Resolving incongruence: Species of hybrid Origin in *Columnnea* (Gesneriaceae).**

In: *Molecular Phylogenetics and Evolution* 106, p. 228–240. DOI: 10.1016/j.ympev.2016.10.001.

SMITH, JAMES F.; DRAPER, SCOTTIE B.; HILEMAN, LENA C.; BAUM, DAVID A. (2004):

**A phylogenetic Analysis within Tribes Gloxinieae and Gesnerieae (Gesnerioideae: Gesneriaceae).**

In: Systematic Botany 29 (4), p. 947–958. DOI: 10.1600/0363644042451116.

**SMITH, JAMES F.; FUNKE, MINDIE M.; WOO, V. L. (2006):**

**A duplication of Gcyc predates Divergence within Tribe Coronanthereae (Gesneriaceae): phylogenetic Analysis and Evolution.**

In: Plant Systematics and Evolution 261 (1-4), p. 245–256. DOI: 10.1007/s00606-006-0445-6.

**SMITH, JAMES F.; HILEMAN, LENA C.; POWELL, MARTYN P.; BAUM, DAVID A. (2004):**

**Evolution of Gcyc, a Gesneriaceae homolog of Cycloidea, within Gesnerioideae (Gesneriaceae).**

In: Molecular Phylogenetics and Evolution 31 (2), p. 765–779. DOI: 10.1016/j.ympev.2003.09.012.

**WANG, CHUN-NENG; MÖLLER, MICHAEL; CRONK, QUENTIN C.B. (2004):**

**Phylogenetic Position of *Titanotrichum oldhamii* (Gesneriaceae) inferred from Four Different Gene Regions.**

In: Systematic Botany 29 (2), p. 407–418.

**WANG, Y.-Z.; LI, Z.-Y. (2002):**

**Inflorescence development of *Whytockia* (Epithemateae, Gesneriaceae) and phylogenetic Implications within Gesneriaceae.**

In: Plant Systematics and Evolution 236 (1), p. 45–54. DOI: 10.1007/s00606-002-0234-9.

**WANG, YIN-ZHENG; LIANG, RONG-HUA; WANG, BO-HAN; LI, JIA-MEI; QIU, ZHI-JING; LI, ZHEN-YU; WEBER, ANTON (2010):**

**Origin and phylogenetic Relationships of the Old World Gesneriaceae with actinomorphic flowers inferred from ITS and trnL-trnF Sequences.**

In: Taxon 59 (4), p. 1044–1052. DOI: 10.1002/tax.594005.

**WANG, YIN-ZHENG; MAO, RU-BING; LIU, YAN; LI, JIA-MEI; DONG, YANG; LI, ZHEN-YU; SMITH, JAMES F. (2011):  
Phylogenetic Reconstruction of *Chirita* and Allies (Gesneriaceae) with taxonomic Treatments.**

In: Journal of Systematics and Evolution 49 (1), p. 50–64. DOI: 10.1111/j.1759-6831.2010.00113.x.

**WEBER, ANTON; CLARK, JOHN L.; MÖLLER, MICHAEL (2013):**

**A new formal Classification of Gesneriaceae.**

In: Selbyana 31 (2), p. 68–94.

**WEBER, ANTON; MIDDLETON, DAVID J.; FORREST, ALAN; KIEW, RUTH; LIM, CHUNG LU; RAFIDAH, A. R. ET AL. (2011):  
Molecular Systematics and remodelling of *Chirita* and associated Genera (Gesneriaceae).**

In: Taxon 60 (3), p. 767–790. DOI: 10.1002/tax.603012.

**YU, XUN-LIN; LI, MING; ZHOU, JIAN-JUN; LI, PENG-WEI (2015):**

***Petrocodon hunanensis* (Gesneriaceae), a new Species identified by both morphological and molecular Evidence from Limestone Area in Hunan, China.**

In: Phytotaxa 195 (1), p. 65. DOI: 10.11646/phytotaxa.195.1.4.

## **Gisekiaceae**

**BISSINGER, KERSTIN; KHOSHRAVESH, ROXANNE; KOTRADE, JAN PETER; OAKLEY, JASON; SAGE, TAMMY L.; SAGE, ROWAN F. ET AL. (2014):**

***Gisekia* (Gisekiaceae): phylogenetic Relationships, Biogeography, and Ecophysiology of a poorly known C<sub>4</sub> Lineage in the Caryophyllales.**

In: American Journal of Botany 101 (3), p. 499–509. DOI: 10.3732/ajb.1300279.

## Gleicheniaceae

**BROWNSEY, P. J.; EWANS, R.; RANCE, B.; WALLS, S.; PERRIE, LEON R. (2013):**

**A Review of the Fern Genus *Sticherus* (Gleicheniaceae) in New Zealand with Confirmation of two new Species Records.**

In: New Zealand Journal of Botany 51 (2), p. 104–115. DOI: 10.1080/0028825X.2013.773917.

**GONZALES, R. JASIVIA; KESSLER, MICHAEL (2011):**

**A Synopsis of the Neotropical Species of *Sticherus* (Gleicheniaceae), with Descriptions of nine new Species.**

In: Phytotaxa 31, p. 1–54.

**PERRIE, LEON R.; BAYLY, MICHAEL J.; LEHNEBACH, CARLOS A.; BROWNSEY, PATRICK J. (2007):**

**Molecular Phylogenetics and molecular Dating of the New Zealand Gleicheniaceae.**

In: Brittonia 59 (2), p. 129–141. DOI: 10.1663/0007-196X(2007)59[129:MPAMDO]2.0.CO;2.

## Gnetaceae

**BIYE, ELVIRE H.; BALKWILL, KEVIN; CRON, GLYNIS V. (2014):**

**A clarification of *Gnetum* L. (Gnetaceae) in Africa and the Description of two new Species.**

In: Plant Systematics and Evolution 300 (2), p. 263–272. DOI: 10.1007/s00606-013-0879-6.

**HAJIBABAEI, MEHRDAD; XIA, JUNNAN; DROUIN, GUY (2006):**

**Seed plant Phylogeny: Gnetophytes are derived Conifers and a Sister Group to Pinaceae.**

In: Molecular Phylogenetics and Evolution 40 (1), p. 208–217. DOI: 10.1016/j.ympev.2006.03.006.

**HOU, CHEN; HUMPHREYS, AELYS M.; THUREBORN, OLLE; RYDIN, CATARINA (2015):**

**New Insights into the evolutionary History of *Gnetum* (Gnetales).**

In: Taxon 64 (2), p. 239–253. DOI: 10.12705/642.12.

**WON, HYOSIG; RENNER, SUSANNE P. (2005):**

**The Internal Transcribed Spacer of nuclear ribosomal DNA in the Gymnosperm *Gnetum*.**

In: Molecular Phylogenetics and Evolution 36 (3), p. 581–597. DOI: 10.1016/j.ympev.2005.03.011.

**WON, HYOSIG; RENNER, SUSANNE P. (2006):**

**Dating Dispersal and Radiation in the Gymnosperm *Gnetum* (Gnetales) - Clock Calibration When Outgroup Relationships are uncertain.**

In: Systematic Biology 55 (4), p. 610–622. DOI: 10.1080/10635150600812619.

**WU, CHUNG-SHIEN; LAI, YU-TING; LIN, CHING-PING; WANG, YA-NAN; CHAW, SHU-MIAW (2009):**

**Evolution of reduced and compact Chloroplast Genomes (cpDNAs) in Gnetophytes: selection toward a lower-cost Strategy.**

In: Molecular Phylogenetics and Evolution 52 (1), p. 115–124. DOI: 10.1016/j.ympev.2008.12.026.

## Goodeniaceae

**GARDNER, ANDREW G.; SESSA, EMILY B.; MICHENER, PRYCE; JOHNSON, EDEN; SHEPHERD, KELLY A.; HOWARTH, DIANELLA G.; JABAILY, RACHEL SCHMIDT (2016):**

**Utilizing Next-generation Sequencing to resolve the Backbone of the core Goodeniaceae and inform future taxonomic and Floral form Studies.**

In: Molecular Phylogenetics and Evolution 94 (Pt B), p. 605–617. DOI: 10.1016/j.ympev.2015.10.003.

**HOWARTH, DIANELLA G.; BAUM, DAVID A. (2005):**

**Genealogical Evidence of homoploid Hybrid Speciation in an adaptive Radiation of *Scaevola* (Goodeniaceae) in the Hawaiian Islands.**

In: *Evolution* 59 (5), p. 948. DOI: 10.1554/03-752.

HOWARTH, DIANELLA G.; GUSTAFSSON, MATS H.G.; BAUM, DAVID A.; MOTLEY, TIMOTHY J. (2003):

**Phylogenetics of the Genus *Scaevola* (Goodeniaceae): Implication for Dispersal Patterns across the Pacific Basin and Colonization of the Hawaiian Islands.**

In: *American Journal of Botany* 90 (6), p. 915–923. DOI: 10.3732/ajb.90.6.915.

JABAILY, RACHEL SCHMIDT; SHEPHERD, KELLY A.; GUSTAFSSON, MATS H.G.; SAGE, LEIGH W.; KRAUSS, SIEGY L.; HOWARTH, DIANELLA G.; MOTLEY, TIMOTHY J. (2012):

**Systematics of the Austral-Pacific Family Goodeniaceae: Establishing a taxonomic and evolutionary Framework.**

In: *Taxon* 61 (2), p. 419–436.

## Grewiaceae

BRUNKEN, ULRIKE; MÜLLNER, ALEXANDRA N. (2012):

**A new tribal Classification of Grewioideae (Malvaceae) based on morphological and molecular phylogenetic Evidence.**

In: *Systematic Botany* 37 (3), p. 699–711. DOI: 10.1600/036364412X648670.

WHITLOCK, BARBARA A.; KAROL, KENNETH G.; ALVERSON, WILLIAM P. (2003):

**Chloroplast DNA Sequences confirm the Placement of the Enigmatic *Oceanopapaver* within *Corchorus* (Grewioideae: Malvaceae s.l., formerly Tiliaceae).**

In: *International Journal of Plant Sciences* 164 (1), p. 35–41.

## Grossulariaceae

SCHULTHEIS, LISA M.; DONOGHUE, MICHAEL J. (2004):

**Molecular Phylogeny and Biogeography of *Ribes* (Grossulariaceae), with an Emphasis on Gooseberries (Subg. *Grossularia*).**

In: *Systematic Botany* 29 (1), p. 77–96.

SENTERS, ANNE E.; SOLTIS, DOUGLAS E. (2003):

**Phylogenetic Relationships in *Ribes* (Grossulariaceae) inferred from ITS Sequence Data.**

In: *Taxon* 52, p. 51–66.

## Guamatelaceae

OH, SANG-HUN; POTTER, DANIEL (2006):

**Description and phylogenetic Position of a new Angiosperm Family, Guamatelaceae, inferred from Chloroplast *rbcl*, *atpB*, and *matK* Sequences.**

In: *Systematic Botany* 31 (4), p. 730–738.

## Gunneraceae

WANNTORP, LIVIA; WANNTORP, HANS-ERIK; KÄLLERSJÖ, MARI (2002):

**The identity of *Gunnera manicata* Linden ex André - resolving a Brazilian-Colombian Enigma.**

In: *Taxon* 51 (3), p. 493–497. DOI: 10.2307/1554861.

WANNTORP, LIVIA; WANNTORP, HANS-ERIK; OXELMAN, BENGT; KÄLLERSJÖ, MARI (2001):

**Phylogeny of *Gunnera*.**

In: *Plant Systematics and Evolution* 226 (1-2), p. 85–107. DOI: 10.1007/s006060170075.

## Gymnospermae

**AVERYANOV, LEONID V.; NGUYEN, TIEN HIEP; SINH, KHANG NGUYEN; VAN PHAM, THE; LAMXAY, VICHITH; BOUNPHANMY, SOMCHANH ET AL. (2014):**

### **Gymnosperms of Laos.**

In: *Nordic Journal of Botany* 32 (6), p. 765–805. DOI: 10.1111/njb.00498.

**RAI, HARDEEP S.; REEVES, PATRICK A.; PEAKALL, ROD; OLMSTEAD, RICHARD G.; GRAHAM, SEAN W. (2008):**

### **Inference of higher-order Conifer Relationships from a multi-locus Plastid Data Set.**

In: *Botany* 86 (7), p. 658–669. DOI: 10.1139/B08-062.

**RAN, JIN-HUA; GAO, HUI; WANG, XIAO-QUAN (2010):**

### **Fast Evolution of the retroprocessed mitochondrial RPS3 Gene in Conifer II and further Evidence for the Phylogeny of Gymnosperms.**

In: *Molecular Phylogenetics and Evolution* 54 (1), p. 136–149. DOI: 10.1016/j.ympev.2009.09.011.

**WANG, XIAO-QUAN; RAN, JIN-HUA (2014):**

### **Evolution and Biogeography of Gymnosperms.**

In: *Molecular Phylogenetics and Evolution* 75, p. 24–40. DOI: 10.1016/j.ympev.2014.02.005.

## Haemodoraceae

**AERNE-HAINS, LAYLA; SIMPSON, MICHAEL G. (2017):**

### **Vegetative Anatomy of the Haemodoraceae and its phylogenetic Significance.**

In: *International Journal of Plant Sciences* 178 (2), p. 117–156. DOI: 10.1086/689199.

**HOPPER, STEPHEN D.; SMITH, RHIAN J.; FAY, MICHAEL F.; MANNING, JOHN C.; CHASE, MARK W. (2009):**

### **Molecular Phylogenetics of Haemodoraceae in the Greater Cape and Southwest Australian Floristic Regions.**

In: *Molecular Phylogenetics and Evolution* 51 (1), p. 19–30. DOI: 10.1016/j.ympev.2008.11.015.

## Haloragaceae

**CHEN, LING-YUN; ZHAO, SHU-YING; MAO, KANG-SHAN; LES, DONALD H.; WANG, QING-FENG; MOODY, MICHAEL L. (2014):**

### **Historical Biogeography of Haloragaceae: an out-of-Australia Hypothesis with multiple intercontinental Dispersals.**

In: *Molecular Phylogenetics and Evolution* 78, p. 87–95. DOI: 10.1016/j.ympev.2014.04.030.

**MOODY, MICHAEL L.; LES, DONALD H. (2007):**

### **Phylogenetic Systematics and Character Evolution in the Angiosperm Family Haloragaceae.**

In: *American Journal of Botany* 94 (12), p. 2005–2025.

**MOODY, MICHAEL L.; LES, DONALD H. (2010):**

### **Systematics of the aquatic Angiosperm Genus *Myriophyllum* (Haloragaceae).**

In: *Systematic Botany* 35 (1), p. 121–139. DOI: 10.1600/036364410790862470.

## Hamamelidaceae

**LI, JIAN-HUA; LINN BOGLE, A.; KLEIN, ANITA P. (1999):**

### **Phylogenetic Relationships of the Hamamelidaceae inferred from Sequences of Internal Transcribed Spacers (ITS) of Nuclear Ribosomal DNA.**

In: *American Journal of Botany* 86 (7), p. 1027–1037.

**MAGALLÓN, SUSANA (2007):**

### **From Fossils to Molecules: Phylogeny and the Core Eudicot Floral Groundplan in Hamamelidoideae (Hamamelidaceae, Saxifragales).**

In: Systematic Botany 32 (2), p. 317–347.

**QI, ZHE-CHEN; YU, YI; LIU, XIANG; PAIS, ANDREW; RANNEY, THOMAS; WHETTEN, ROSS; XIANG, QIU-YUN JENNY (2015):  
Phylogenomics of polyploid *Fothergilla* (Hamamelidaceae) by RAD-tag based GBS-  
Insights into Species Origin and effects of software pipelines.**

In: Journal of Systematics and Evolution 53 (5), p. 432–447. DOI: 10.1111/jse.12176.

**XIE, LEI; YI, TING-SHUANG; LI, RONG; LI, DE-ZHU; WEN, JUN (2010):**

**Evolution and biogeographic Diversification of the witch-hazel Genus (*Hamamelis* L.,  
Hamamelidaceae) in the Northern Hemisphere.**

In: Molecular Phylogenetics and Evolution 56 (2), p. 675–689. DOI: 10.1016/j.ympev.2010.02.018.

## Hanguanaceae

**LEONG-ŠKORNIČKOVÁ, JANA; NIISALO, MATTI A. (2017):**

**Identity and typification of *Hanguana malayana* and *H. anthelminthica* and Notes  
on other early Names in Hanguanaceae.**

In: Plant Systematics and Evolution 303 (9), p. 1213–1223. DOI: 10.1007/s00606-017-1432-9.

**RAHMAN, SITI NURFAZIBT ABDUL; OTHMAN, AHMAD SOFIMAN; BOYCE, PETER C. (2011):**

**Studies on *Hanguana* (Commelinales-Hanguanaceae) for Sunda I: *Hanguana  
bakoensis*, a new Forest Species from Sarawak, Malaysian Borneo, and Notes on  
Critical Morphologies for Elucidating *Hanguana* Taxonomy.**

In: Acta Phytotaxonomica Geobotanica 61 (3), p. 139–143.

## Heliconiaceae

**ILES, WILLIAM J. D.; SASS, CHODON; LAGOMARSINO, LAURA P.; BENSON-MARTIN, GRACIE; DRISCOLL, HEATHER E.;  
SPECHT, CHELSEA D. (2017):**

**The Phylogeny of *Heliconia* (Heliconiaceae) and the Evolution of Floral presentation.**

In: Molecular Phylogenetics and Evolution 117, p. 150–167. DOI: 10.1016/j.ympev.2016.12.001.

**ISAZA, L.; MARULANDA, M. L.; LÓPEZ, A. M. (2012):**

**Genetic Diversity and molecular characterization of several *Heliconia* Species in  
Colombia.**

In: Genetics and molecular Research 11 (4), p. 4552–4563. DOI: 10.4238/2012.November.12.9.

**MAROUELLI, L. P.; INGLIS, P. W.; FERREIRA, M. A.; BUSO, G. P. C. (2010):**

**Genetic Relationships among *Heliconia* (Heliconiaceae) Species based on RAPD  
Markers.**

In: Genetics and molecular Research 9 (3), p. 1377–1387. DOI: 10.4238/vol9-3gmr847.

## Heliotropiaceae

**DIANE, NADJA; FÖRTHNER, HARALD; HILGER, HARTMUT H. (2002):**

**A systematic Analysis of *Heliotropium*, *Tournefortia*, and allied Taxa of the  
Heliotropiaceae (Boraginales) based on ITS1 Sequences and morphological Data.**

In: American Journal of Botany 89 (2), p. 287–295. DOI: 10.3732/ajb.89.2.287.

**FEUILLET, CHRISTIAN (2016):**

**Two new Combinations in *Euploca* Nutt. (Heliotropiaceae, Boraginales) and a  
Conspectus of the Species of the Guiana Shield Area.**

In: PhytoKeys (61), p. 101–124. DOI: 10.3897/phytokeys.61.6260.

**LUEBERT, FEDERICO; BROKAMP, GRISCHA; WEN, JUN; WEIGEND, MAXIMILIAN; HILGER, HARTMUT H. (2011):**

**Phylogenetic Relationships and morphological Diversity in Neotropical *Heliotropium*  
(Heliotropiaceae).**



In: *Taxon* 60 (3), p. 663–680.

**LUEBERT, FEDERICO; FROHLICH, MICHAEL W. (2016):**

**Four new Combinations in Argentinian Heliotropiaceae.**

In: *Darwiniana, nueva serie* 4 (2), p. 192–194. DOI: 10.14522/darwiniana.2016.42.717.

**LUEBERT, FEDERICO; HILGER, HARTMUT H.; WEIGEND, MAXIMILIAN (2011):**

**Diversification in the Andes: Age and Origins of South American *Heliotropium* Lineages (Heliotropiaceae, Boraginales).**

In: *Molecular Phylogenetics and Evolution* 61 (1), p. 90–102. DOI: 10.1016/j.ympev.2011.06.001.

**LUEBERT, FEDERICO; WEN, JUN (2008):**

**Phylogenetic Analysis and evolutionary Diversification of *Heliotropium* Sect. *Cochranea* (Heliotropiaceae) in the Atacama Desert.**

In: *Systematic Botany* 33 (2), p. 390–402. DOI: 10.1600/036364408784571635.

## Hemerocallidaceae

**FURNESS, CAROL A.; CONRAN, JOHN G.; GREGORY, THOMAS; RUDALL, PAULA J. (2013):**

**The trichotomosulcate asparagoids: Pollen Morphology of Hemerocallidaceae in Relation to Systematics and Pollination Biology.**

In: *Australian Systematic Botany* 26, p. 393–407.

**HUH, MAN KYU; KWON, OH SUNG; LEE, BYEONG RYONG (2013):**

**Phylogenetic Relationships of the Genus *Hemerocallis* in Korea Using rps16-trnK Sequences in Chloroplast DNA.**

In: *Journal of Life Science* 23 (7), p. 847–853. DOI: 10.5352/JLS.2013.23.7.847.

**WURDACK, KENNETH J.J.; DORR, LAURENCE J. (2009):**

**The South American Genera of Hemerocallidaceae (*Eccremis* and *Pasithea*): two introductions to the New World.**

In: *Taxon* 58 (4), p. 1122–1134. DOI: 10.1002/tax.584006.

## Herreriaceae

**LOPES, ROSANA CONRADO; ANDREATA, REGINA HELENA POTSCH (2006):**

**A new Species of *Clara* (Herreriaceae) from Brazil.**

In: *Systematic Botany* 31 (2), p. 298–301.

## Huerteales

**WORBERG, ANDREAS; ALFORD, MAC H.; QUANDT, DIETMAR; BORSCH, THOMAS (2009):**

**Huerteales sister to Brassicales plus Malvales, and newly circumscribed to include *Dipentodon*, *Gerrardina*, *Hurtea*, *Perrottetia*, and *Tapiscia*.**

In: *Taxon* 58 (2), p. 468–478. DOI: 10.1002/tax.582012.

## Humiriaceae

**HERRERA, FABIANY; MANCHESTER, STEVEN R.; JARAMILLO, CARLOS; MACFADDEN, BRUCE; DA SILVA-CAMINHA, SILANE A. (2010):**

**Phytogeographic History and Phylogeny of the Humiriaceae.**

In: *International Journal of Plant Sciences* 171 (4), p. 392–408. DOI: 10.1086/651229.

## Hyacinthaceae

**ALI, SYED SHUJAIT; PFOSSER, MARTIN; WETSCHNIG, WOLFGANG; MARTÍNEZ-AZORÍN, MARIO; CRESPO, MANUEL B.; YU, YANG (2013):**

**Out of Africa: Miocene Dispersal, Vicariance, and Extinction within Hyacinthaceae Subfamily Urgineoideae.**

In: Journal of Integrative Plant Biology 55 (10), p. 950–964. DOI: 10.1111/jipb.12065.

**ALI, SYED SHUJAIT; YU, YANG; PFOSSER, MARTIN; WETSCHNIG, WOLFGANG (2012):**

**Inferences of biogeographical Histories within Subfamily Hyacinthoideae using S-  
diva and Bayesian binary MCMC Analysis implemented in RASP (Reconstruct  
Ancestral State in Phylogenies).**

In: Annals of Botany 109 (1), p. 95–107. DOI: 10.1093/aob/mcr274.

**DESAI, NEETIN; KAWALKAR, HEMANT; DIXIT, GHANSHAM (2012):**

**Biosystematics and evolutionary Studies in Indian *Drimia* Species.**

In: Journal of Systematics and Evolution 50 (6), p. 512–518. DOI: 10.1111/j.1759-6831.2012.00212.x.

**GRUNDMANN, MICHAEL; RUMSEY, FRED J.; ANSELL, STEPHEN W.; RUSSELL, STEPHEN J.; DARWIN, SARAH C.; VOGEL,  
JOHANNES C. ET AL. (2010):**

**Phylogeny and Taxonomy of the Bluebell Genus *Hyacinthoides*, Asparagaceae  
[Hyacinthaceae].**

In: Taxon 59 (1), p. 68–82. DOI: 10.1002/tax.591008.

**KNIRSCH, WALTER; MARTÍNEZ-AZORÍN, MARIO; PFOSSER, MARTIN; WETSCHNIG, WOLFGANG (2015):**

**The Reinstatement and Rediagnosis of the madagascan Genus *Rhodocodon*  
(Asparagaceae, Scilloideae), with validation and remarks on H. Perrier's Taxa.**

In: Phytotaxa 195 (2), p. 101. DOI: 10.11646/phytotaxa.195.2.1.

**LEBATHA, PEARL; BUYS, MATT H.; STEDJE, BRITA (2006):**

***Ledebouria, Resnova* and *Drimiopsis* : a Tale of three Genera.**

In: Taxon 55 (3), p. 643–652. DOI: 10.2307/25065640.

**MANNING, JOHN C.; DEACON, JAMES; GOLDBLATT, PETER (2014):**

**A Review of the *Schizobasis* Group of *Drimia* Jacq. (Hyacinthaceae: Urgineoideae),  
and the new Species *D. sigmoidea* from Western Cape, South Africa.**

In: South African Journal of Botany 94, p. 263–269. DOI: 10.1016/j.sajb.2014.07.011.

**MANNING, JOHN C.; FOREST, FÉLIX; DEVEY, DION S.; FAY, MICHAEL F.; GOLDBLATT, PETER (2009):**

**A molecular Phylogeny and a revised Classification of Ornithogaloideae  
(Hyacinthaceae) based on an Analysis of four Plastid DNA Regions.**

In: Taxon 58 (1), p. 77–107. DOI: 10.1002/tax.581011.

**MANNING, JOHN C.; GOLDBLATT, PETER; FAY, MICHAEL F. (2003):**

**A Revised Generic Synopsis of Hyacinthaceae in Sub-Saharan Africa, based on  
molecular Evidence, including new Combinations and the new Tribe  
*Pseudoprosperae*.**

In: Edinburgh Journal of Botany 60 (3). DOI: 10.1017/S0960428603000404.

**MARTÍNEZ-AZORÍN, MARIO; CRESPO, MANUEL B.; DOLD, ANTHONY P.; WETSCHNIG, WOLFGANG; PINTER, MICHAEL;  
PFOSSER, MARTIN; VAN JAARVELD, ERNST (2013):**

***Sagittanthera* (Hyacinthaceae, Urgineoideae), a new Buzz pollinated Genus from the  
Eastern Cape Province of South Africa.**

In: Phytotaxa 98 (2), p. 43. DOI: 10.11646/phytotaxa.98.2.2.

**MARTÍNEZ-AZORÍN, MARIO; CRESPO, MANUEL B.; JUAN, ANA; FAY, MICHAEL F. (2011):**

**Molecular Phylogenetics of Subfamily Ornithogaloideae (Hyacinthaceae) based on  
nuclear and Plastid DNA Regions, including a new taxonomic Arrangement.**

In: *Annals of Botany* 107 (1), p. 1–37. DOI: 10.1093/aob/mcq207.

**PFOSSER, MARTIN; KNIRSCH, WALTER; PINTER, MICHAEL; ALI, SYED SHUJAIT; DUTTA, SUCHANDRA; WETSCHNIG, WOLFGANG (2012):**

**Phylogenetic Relationships of Malagasy Hyacinthaceae.**

In: *Plant Ecology and Evolution* 145 (1), p. 65–72. DOI: 10.5091/plecevo.2012.590.

**PFOSSER, MARTIN; WETSCHNIG, WOLFGANG; UNGAR, S.; PRENNER, GERHARD (2003):**

**Phylogenetic Relationships among Genera of Massonieae (Hyacinthaceae) inferred from Plastid DNA and Seed Morphology.**

In: *Journal of Plant Research* 116 (2), p. 115–132. DOI: 10.1007/s10265-003-0076-8.

**PINTER, MICHAEL; CRESPO, MANUEL B.; ILG, IRMGARD; LUIDOLD, ANNA K.; MARTÍNEZ-AZORÍN, MARIO; MÜLLER-DOBLIES, UTE ET AL. (2013):**

**Mucinaea (Hyacinthaceae-Urgineoideae), a remarkable new Genus from Namaqualand (Northern Cape Province, South Africa).**

In: *Phyton (Horn, Austria)* 53 (2), p. 289–304.

**STEDJE, BRITA (1998):**

**Phylogenetic Relationships and generic Delimitation of Sub-Saharan *Scilla* (Hyacinthaceae) and allied African Genera as inferred from morphological and DNA Sequence Data.**

In: *Plant Systematics and Evolution* 211 (1-2), p. 1–11. DOI: 10.1007/BF00984908.

**SUÁREZ-SANTIAGO, VÍCTOR N.; SALINAS, MARÍA J.; ROMERO-GARCÍA, ANA T.; GARRIDO-RAMOS, MANUEL A.; LA HERRÁN, ROBERTO; RUIZ-REJÓN, CARMELO ET AL. (2007):**

**Polyploidy, the major Speciation mechanism in *Muscari* Subgenus *Botryanthus* in the Iberian Peninsula.**

In: *Taxon* 56 (4), p. 1171–1184. DOI: 10.2307/25065910.

**WETSCHNIG, WOLFGANG; KNIRSCH, WALTER; ALI, SYED SHUJAIT; PFOSSER, MARTIN (2007):**

**Systematic Position of three little known and frequently misplaced Species of Hyacinthaceae from Madagascar.**

In: *Phyton (Horn, Austria)* 47 (1-2), p. 321–337.

**WETSCHNIG, WOLFGANG; PFOSSER, MARTIN (2003):**

**The *Scilla plumbea* puzzle-present Status of the Genus *Scilla* sensu lato in southern Africa and Description of *Spetaea lachenaliiflora*, a new Genus and Species of Massonieae (Hyacinthaceae).**

In: *Taxon* 52 (1), p. 75–92. DOI: 10.2307/3647303.

**YILDIRIM, HASAN; GEMÍCÍ, YUSUF; WILKIN, PAUL (2013):**

***Scilla vardaria* (Asparagaceae Subfamily Scilloideae): a threatened new Species of *Scilla* L. from Northeast Turkey with a Floral Corona.**

In: *Phytotaxa* 91 (2), p. 50. DOI: 10.11646/phytotaxa.91.2.3.

## Hydatellaceae

**ILES, WILLIAM J. D.; RUDALL, PAULA J.; SOKOLOFF, DMITRY D.; REMIZOWA, MARGARITA V.; MACFARLANE, TERRY D.; LOGACHEVA, MARIA D.; GRAHAM, SEAN W. (2012):**

**Molecular Phylogenetics of Hydatellaceae (Nymphaeales): Sexual-system Homoplasy and a new Sectional Classification.**

In: *American Journal of Botany* 99 (4), p. 663–676. DOI: 10.3732/ajb.1100524.

**SAARELA, JEFFERY M.; RAI, HARDEEP S.; DOYLE, JAMES A.; ENDRESS, PETER K.; MATHEWS, SARAH; MARCHANT, ADAM D. ET AL. (2007):**

## **Hydatellaceae identified as a new Branch near the Base of the Angiosperm phylogenetic Tree.**

In: *Nature* 446 (7133), p. 312–315. DOI: 10.1038/nature05612.

**SOKOLOFF, DMITRY D.; REMIZOWA, MARGARITA V.; MACFARLANE, TERRY D.; RUDALL, PAULA J. (2008):  
Classification of the early-divergent Angiosperm Family Hydatellaceae: one Genus instead of two, four new Species and sexual Dimorphism in dioecious Taxa.**

In: *Taxon* 57 (1), p. 179–200.

## **Hydnoraceae**

**NICKRENT, DANIEL LEE; BLARER, ALBERT; QIU, YIN-LONG; SOLTIS, DOUGLAS E.; SOLTIS, PAMELA S.; ZANIS, MICHAEL J. (2002):**

**Molecular Data place Hydnoraceae with Aristolochiaceae.**

In: *American Journal of Botany* 89 (11), p. 1809–1817. DOI: 10.3732/ajb.89.11.1809.

## **Hydrangeaceae**

**GUO, YUE-LONG; PAIS, ANDREW; WEAKLEY, ALAN S.; XIANG, QIU-YUN JENNY (2013):**

**Molecular phylogenetic Analysis suggests Paraphyly and early Diversification of *Philadelphus* (Hydrangeaceae) in western North America: new Insights into Affinity with *Carpenteria*.**

In: *Journal of Systematics and Evolution* 51 (5), p. 545–563. DOI: 10.1111/jse.12041.

**KIM, CHANGKYUN; DENG, TAO; WEN, JUN; NIE, ZE-LONG; SUN, HANG (2015):**

**Systematics, Biogeography, and Character Evolution of *Deutzia* (Hydrangeaceae) inferred from nuclear and Chloroplast DNA Sequences.**

In: *Molecular Phylogenetics and Evolution* 87, p. 91–104. DOI: 10.1016/j.ympev.2015.03.002.

**SMET, YANNICK; CLERCK, OLIVIER; UEMACHI, TATSUYA; GRANADOS MENDOZA, CAROLINA; WANKE, STEFAN; GOETGHEBEUR, PAUL; SAMAIN, MARIE-STÉPHANIE (2017):**

**Multilocus coalescent Species Delimitation to evaluate traditionally defined Morphotypes in *Hydrangea* Sect. *Asperae* (Hydrangeaceae).**

In: *Molecular Phylogenetics and Evolution* 114, p. 415–425. DOI: 10.1016/j.ympev.2017.05.021.

**SMET, YANNICK; GRANADOS MENDOZA, CAROLINA; WANKE, STEFAN; GOETGHEBEUR, PAUL; SAMAIN, MARIE-STÉPHANIE (2015):**

**Molecular Phylogenetics and new (infra)generic Classification to alleviate Polyphyly in Tribe Hydrangeae (Cornales: Hydrangeaceae).**

In: *Taxon* 64 (4), p. 741–753. DOI: 10.12705/644.6.

## **Hydrocharitaceae**

**CHEN, LING-YUN; CHEN, JIN-MING; GITURU, ROBERT WAHITI; WANG, QING-FENG (2012):**

**Generic Phylogeny, historical Biogeography and Character Evolution of the cosmopolitan aquatic Plant Family Hydrocharitaceae.**

In: *BMC Evolutionary Biology* 12, p. 30. DOI: 10.1186/1471-2148-12-30.

**LES, DONALD H.; JACOBS, SURREY W.L.; TIPPERY, NICHOLAS P.; CHEN, LEI; MOODY, MICHAEL L.; WILSTERMANN-HILDEBRAND, MAIKE (2008):**

**Systematics of *Vallisneria* (Hydrocharitaceae).**

In: *Systematic Botany* 33 (1), p. 49–65. DOI: 10.1600/036364408783887483.

**LES, DONALD H.; SHELDON, SALLIE P.; TIPPERY, NICHOLAS P. (2010):**

**Hybridization in Hydrophiles: Natural Interspecific Hybrids in *Najas* (Hydrocharitaceae).**

In: Systematic Botany 35 (4), p. 736–744. DOI: 10.1600/036364410X539826.

WAYCOTT, MICHELLE; FRESHWATER, D. WILSON; YORK, ROBERT A.; CALLADINE, AINSLEY; KENWORTHY, W. JUDSON (2002):

**Evolutionary Trends in the Seagrass Genus *Halophila* (Thourars): Insights from molecular Phylogeny.**

In: Bulletin of Marine Science 71 (3), p. 1299–1308.

## Hydroleaceae

ERBAR, C.; POREMBSKI, STEFAN; LEINS, PETER (2005):

**Contributions to the systematic Position of *Hydrolea* (Hydroleaceae) based on Floral development.**

In: Plant Systematics and Evolution 252 (1-2), p. 71–83. DOI: 10.1007/s00606-004-0263-7.

## Hydrophyllaceae

BARR, CAMILLE M. (2014):

**Phylogenetic Relationships and crossing Data reveal a new Species of *Nemophila* (Boraginaceae).**

In: Madroño 61 (3), p. 308–315. DOI: 10.3120/0024-9637-61.3.308.

FERGUSON, DIANE M. (1999):

**Phylogenetic Analysis and Relationships in Hydrophyllaceae based on ndhF Sequence Data.**

In: Systematic Botany 23 (3), p. 253–268.

GILBERT, CYNTHIA; DEMPCY, JOHN; GANONG, CONSTANCE; PATTERSON, ROBERT W.; SPICER, GREG P. (2005):

**Phylogenetic Relationships within *Phacelia* Subgenus *Phacelia* (Hydrophyllaceae) inferred from Nuclear rDNA ITS Sequence Data.**

In: Systematic Botany 30 (3), p. 627–634.

HANSEN, DEBRA R.; SPICER, GREG S.; PATTERSON, ROBERT W. (2009):

**Phylogenetic Relationships between and within *Phacelia* Sections *Whitlavia* and *Gymnobythus* (Boraginaceae).**

In: Systematic Botany 34 (4), p. 737–746. DOI: 10.1600/036364409790139637.

## Hydrostachyaceae

FAN, CHUANZHU; XIANG, QIU-YUN (2003):

**Phylogenetic Analyses of Cornales based on 26s rRNA and combined 26s rDNA-MATK-RBCL Sequence Data.**

In: American Journal of Botany 90 (9), p. 1357–1372. DOI: 10.3732/ajb.90.9.1357.

## Hymenophyllaceae

BAURET, LUCIE; GRALL, AURELIE; SENTERRE, BRUNO; ROUHAN, GERMINAL; HENNEQUIN, SABINE; EBIHARA, ATSUSHI; DUBUISSON, JEAN-YVES (2015):

**New Circumscription of *Trichomanes cupressoides* Desvaux (Hymenophyllaceae), an endemic filmy Fern from the Seychelles (Indian Ocean), and new Insights into the Genus *Abrodictyum* C.Presl in the Western Indian Ocean.**

In: Phytotaxa 202 (1), p. 1. DOI: 10.11646/phytotaxa.202.1.1.

DUBUISSON, JEAN-YVES; HÉBANT-MAURI, R.; GALTIER, J. (1998):

**Molecules and Morphology: Conflicts and Congruence within the Fern Genus *Trichomanes* (Hymenophyllaceae).**

In: Molecular Phylogenetics and Evolution 9 (3), p. 390–397.

- DUBUISSON, JEAN-YVES; HENNEQUIN, SABINE; DOUZERY, EMMANUEL J. P.; CRANFILL, RAYMOND B.; SMITH, ALAN R.; PRYER, KATHLEEN M. (2003):  
**Rbcl Phylogeny of the Fern Genus *Trichomanes* (Hymenophyllaceae), with Special Reference to Neotropical Taxa.**  
In: International Journal of Plant Sciences 164 (5), p. 753–761.
- DUBUISSON, JEAN-YVES; ROUHAN, GERMINAL; GRALL, AURELIE; HENNEQUIN, SABINE; SENTERRE, BRUNO; PYNEE, K.; EBIHARA, ATSUSHI (2013):  
**New Insights into the Systematics and Evolution of the filmy Fern Genus *Crepidomanes* (Hymenophyllaceae) in the Mascarene Archipelago with a Focus on dwarf Species.**  
In: Acta Botanica Gallica 160 (2), p. 173–194. DOI: 10.1080/12538078.2013.819294.
- EBIHARA, ATSUSHI; DUBUISSON, JEAN-YVES; IWATSUKI, KUNIO; ITO, MOTOMI (2007):  
**Systematics of *Trichomanes* (Hymenophyllaceae: Pteridophyta), Progress and Future Interests.**  
In: the Fern Gazette 18 (2), p. 53–58.
- EBIHARA, ATSUSHI; ISHIKAWA, HIROSHI; MATSUMOTO, SADAMU; LIN, SU-JUAN; IWATSUKI, KUNIO; TAKAMIYA, MASAYUKI ET AL. (2005):  
**Nuclear DNA, Chloroplast DNA, and Ploidy Analysis clarified biological Complexity of the *Vandenboschia radicans* Complex (Hymenophyllaceae) in Japan and adjacent Areas.**  
In: American Journal of Botany 92 (9), p. 1535–1547.
- EBIHARA, ATSUSHI; IWATSUKI, KUNIO; ITO, MOTOMI; HENNEQUIN, SABINE; DUBUISSON, JEAN-YVES (2007):  
**A global molecular Phylogeny of the Fern Genus *Trichomanes* (Hymenophyllaceae) with special Reference to stem Anatomy.**  
In: Botanical Journal of the Linnean Society 155, p. 1–27.
- HENNEQUIN, SABINE (2003):  
**Phylogenetic Relationships within the Fern Genus *Hymenophyllum* s.l. (Hymenophyllaceae, Filicopsida): Contribution of Morphology and Cytology.**  
In: Comptes Rendus Biologies 326 (6), p. 599–611. DOI: 10.1016/S1631-0691(03)00146-X.
- HENNEQUIN, SABINE; EBIHARA, ATSUSHI; ITO, MOTOMI; IWATSUKI, KUNIO; DUBUISSON, JEAN-YVES (2003):  
**Molecular Systematics of the Fern Genus *Hymenophyllum* s.l. (Hymenophyllaceae) based on chloroplastic Coding and Noncoding Regions.**  
In: Molecular Phylogenetics and Evolution 27 (2), p. 283–301. DOI: 10.1016/S1055-7903(02)00404-9.
- HENNEQUIN, SABINE; EBIHARA, ATSUSHI; ITO, MOTOMI; IWATSUKI, KUNIO; DUBUISSON, JEAN-YVES (2006):  
**New Insights into the Phylogeny of the Genus *Hymenophyllum* s.l. (Hymenophyllaceae): Revealing the Polyphyly of *Mecodium*.**  
In: Systematic Botany 31 (2), p. 271–284.
- HENNEQUIN, SABINE; SCHUETTPELZ, ERIC; PRYER, KATHLEEN M.; EBIHARA, ATSUSHI; DUBUISSON, JEAN-YVES (2008):  
**Divergence Times and the Evolution of Epiphytism in Filmy Ferns (Hymenophyllaceae) revisited.**  
In: International Journal of Plant Sciences 169 (9), p. 1278–1287. DOI: 10.1086/591983.
- NITTA, JOEL H. (2008):  
**Exploring the Utility of three Plastid Loci for Biocoding the filmy Ferns (Hymenophyllaceae) of *Moorea*.**  
In: Taxon 57 (3), p. 725–736.

SCHUETTPELZ, ERIC; PRYER, KATHLEEN M. (2006):

**Reconciling extreme Branch Length Differences: decoupling Time and Rate through the evolutionary History of filmy Ferns.**

In: Systematic Biology 55 (3), p. 485–502. DOI: 10.1080/10635150600755438.

## Hypericaceae

MESEGUER, ANDREA SÁNCHEZ; ALDASORO, JUAN JOSÉ; SANMARTÍN, ISABEL (2013):

**Bayesian Inference of Phylogeny, Morphology and Range Evolution reveals a complex evolutionary History in St. John's wort (*Hypericum*).**

In: Molecular Phylogenetics and Evolution 67 (2), p. 379–403. DOI: 10.1016/j.ympev.2013.02.007.

MESEGUER, ANDREA SÁNCHEZ; SANMARTÍN, ISABEL; MARCUSSEN, THOMAS; PFEIL, BERNARD E. (2014):

**Utility of low-copy nuclear Markers in phylogenetic Reconstruction of *Hypericum L.* (Hypericaceae).**

In: Plant Systematics and Evolution 300 (6), p. 1503–1514. DOI: 10.1007/s00606-013-0977-5.

NÜRK, NICOLAI M.; BLATTNER, FRANK R. (2010):

**Cladistic Analysis of morphological Characters in *Hypericum* (Hypericaceae).**

In: Taxon 59 (5), p. 1495–1507. DOI: 10.1002/tax.595014.

NÜRK, NICOLAI M.; MADRIÑÁN, SANTIAGO; CARINE, MARK A.; CHASE, MARK W.; BLATTNER, FRANK R. (2013):

**Molecular Phylogenetics and morphological Evolution of St. John's wort (*Hypericum*; Hypericaceae).**

In: Molecular Phylogenetics and Evolution 66 (1), p. 1–16. DOI: 10.1016/j.ympev.2012.08.022.

ROBSON, NORMAN K. B. (2010):

**Studies in the Genus *Hypericum L.* (Hypericaceae) 5(2). Sections 17. *Hirtella* to 19. *Coridium*.**

In: Phytotaxa 4, p. 127–258.

ROBSON, NORMAN K. B. (2010):

**Studies in the Genus *Hypericum L.* (Hypericaceae) 5(1). Sections 10. *Olympia* to 15/16. *Crossophyllum*.**

In: Phytotaxa 4, p. 5–126.

## Hypoxidaceae

KOCYAN, ALEXANDER; SNIJMAN, DEIRDRE A.; FOREST, FÉLIX; DEVEY, DION S.; FREUDENSTEIN, JOHN V.; WILAND-SZYMAŃSKA, JUSTYNA ET AL. (2011):

**Molecular Phylogenetics of Hypoxidaceae - Evidence from Plastid DNA Data and Inferences on Morphology and Biogeography.**

In: Molecular Phylogenetics and Evolution 60 (1), p. 122–136. DOI: 10.1016/j.ympev.2011.02.021.

KOCYAN, ALEXANDER; WILAND-SZYMAŃSKA, JUSTYNA (2016):

***Friedmannia*: a new Genus from the Seychelles and the beginning of a generic realignment of *Curculigo* (Hypoxidaceae).**

In: Phytotaxa 283 (1), p. 54. DOI: 10.11646/phytotaxa.283.1.3.

LIU, KE-WEI; XIE, GAO-CHANG; CHEN, LI-JUN; XIAO, XIN-JU; ZHENG, YU-YUN; CAI, JING ET AL. (2012):

***Sinocurculigo*, a new Genus of Hypoxidaceae from China based on molecular and morphological Evidence.**

In: Public Library of Science One 7 (6), e38880. DOI: 10.1371/journal.pone.0038880.

SNIJMAN, DEIRDRE A. (2014):

**A taxonomic Revision of the Genus *Pauridia* (Hypoxidaceae) in southern Africa.**

In: Phytotaxa 182 (1), p. 1. DOI: 10.11646/phytotaxa.182.1.1.

## Icacinaceae

**BYNG, JAMES W.; BERNARDINI, BENEDETTA; JOSEPH, JEFFREY A.; CHASE, MARK W.; UTTERIDGE, TIMOTHY M.A. (2014):**

**Phylogenetic Relationships of Icacinaceae focusing on the vining Genera.**

In: Botanical Journal of the Linnean Society 176 (3), p. 277–294. DOI: 10.1111/boj.12205.

**DUNO DE STEFANO, RODRIGO; FERNÁNDEZ-CONCHA, GERMÁN CARNEVALI (2011):**

**Morphology-inferred Phylogeny and a Revision of the Genus *Emmotum* (Icacinaceae) 1.**

In: Annals of the Missouri Botanical Garden 98 (1), p. 1–27. DOI: 10.3417/2007129.

**KÅREHED, JESPER (2001):**

**Multiple Origin of the tropical Forest Tree Family Icacinaceae.**

In: American Journal of Botany 88 (12), p. 2259–2274. DOI: 10.2307/3558388.

**LENS, FREDERIC; KÅREHED, JESPER; BAAS, PIETER; JANSEN, STEVEN; RABAËY, DAVID; HUYSMANS, SUZY ET AL. (2008):**

**The wood Anatomy of the polyphyletic Icacinaceae s.l., and their Relationships within Asterids.**

In: Taxon 57 (2), p. 525–552.

**STULL, GREGORY W.; DUNO DE STEFANO, RODRIGO; SOLTIS, DOUGLAS E.; SOLTIS, PAMELA P. (2015):**

**Resolving basal Lamiid Phylogeny and the Circumscription of Icacinaceae with a plastome-scale Data Set.**

In: American Journal of Botany 102 (11), p. 1794–1813. DOI: 10.3732/ajb.1500298.

## Iridaceae

**ALVES, TIAGO L.S.; CHAUVEAU, OLIVIER; EGGERS, LILIAN; SOUZA-CHIES, TATIANA TEIXEIRA DE (2014):**

**Species discrimination in *Sisyrinchium* (Iridaceae): assessment of DNA Barcodes in a Taxonomically challenging Genus.**

In: molecular Ecology Resources 14 (2), p. 324–335. DOI: 10.1111/1755-0998.12182.

**CHAUVEAU, OLIVIER; EGGERS, LILIAN; RAQUIN, CHRISTIAN; SILVÉRIO, ADRIANO; BROWN, SPENCER C.; COULOUX, ARNAUD ET AL. (2011):**

**Evolution of oil-producing Trichomes in *Sisyrinchium* (Iridaceae): Insights from the first comprehensive phylogenetic Analysis of the Genus.**

In: Annals of Botany 107 (8), p. 1287–1312. DOI: 10.1093/aob/mcr080.

**COŞKUN, FATİH; SELVİ, SELAMI; SATIL, FATİH (2010):**

**Phylogenetic Relationships of some Turkish *Crocus* (Iridaceae) Taxa based on morphological and anatomical Characters.**

In: Turkish Journal of Botany 34, p. 171–178.

**CRESPO, MANUEL B.; MARTÍNEZ-AZORÍN, MARIO; MAVRODIEV, EVGENY V. (2015):**

**Can a Rainbow consist of a single colour? A new comprehensive generic Arrangement of the '*Iris* sensu latissimo' Clade (Iridaceae), congruent with Morphology and molecular Data.**

In: Phytotaxa 232 (1), p. 1. DOI: 10.11646/phytotaxa.232.1.1.

**EROL, OSMAN; HARPKE, DÖRTE; YILDIRIM, HASAN (2015):**

**A new *Crocus* L. (Iridaceae) Species from SE-Turkey, based on morphological and molecular Data.**

In: Phytotaxa 239 (3), p. 223. DOI: 10.11646/phytotaxa.239.3.3.

**GOLDBLATT, PETER (2002):**



**Radiation in the Cape Flora and the Phylogeny of peacock Irises *Moraea* (Iridaceae) based on four Plastid DNA Regions.**

In: *Molecular Phylogenetics and Evolution* 25 (2), p. 341–360. DOI: 10.1016/S1055-7903(02)00235-X.

**GOLDBLATT, PETER; BERNHARDT, PETER; MANNING, JOHN C. (2009):**

**Adaptive Radiation of the putrid Perianth: *Ferraria* (Iridaceae: Irideae) and its unusual Pollinators.**

In: *Plant Systematics and Evolution* 278 (1-2), p. 53–65. DOI: 10.1007/s00606-008-0132-x.

**GOLDBLATT, PETER; LE THOMAS, ANNICK; SUÁREZ-CERVERA, MARIA (2004):**

**Phylogeny of the Afro-Madagascan *Aristea* (Iridaceae) revisited in the Light of new Data on Pollen Morphology.**

In: *Botanical Journal of the Linnean Society* 144 (1), p. 41–68. DOI: 10.1111/j.0024-4074.2004.00246.x.

**GOLDBLATT, PETER; MANNING, JOHN C. (2011):**

**Systematics and biology of the African Genus *Ferraria* (Iridaceae: Irideae).**

In: *Bothalia* 41 (1), p. 1–40. DOI: 10.4102/abc.v41i1.33.

**GOLDBLATT, PETER; MANNING, JOHN C. (2012):**

**Systematics of the southern African Genus *Ixia* (Iridaceae: Crocoideae): 4. Revision of Sect. *Dichone*.**

In: *Bothalia* 42 (2), p. 87–110. DOI: 10.4102/abc.v42i2.11.

**GOLDBLATT, PETER; MANNING, JOHN C.; MUNZINGER, JÉRÔME; LOWRY, PORTER PRESCOTT (2011):**

**A new native Family and new endemic Species for the Flora of New Caledonia: *Patersonia neocaledonica* sp. nov. (Iridaceae, Patersonioideae), from the Mount Humboldt Massif.**

In: *Adansonia* 33 (2), p. 201–208. DOI: 10.5252/a2011n2a4.

**GOLDBLATT, PETER; MANNING, JOHN C.; SCHNITZLER, JAN (2013):**

**A revised infrageneric Classification and Synopsis of the Afro-Eurasian Genus *Moraea* (Iridaceae: Irideae).**

In: *Bothalia* 43 (1), p. 29–41. DOI: 10.4102/abc.v43i1.84.

**GOLDBLATT, PETER; RODRIGUEZ, AARON; POWELL, M. P.; DAVIES, JONATHAN T.; MANNING, JOHN C.; VAN DER BANK, MICHELLE; SAVOLAINEN, VINCENT (2008):**

**Iridaceae 'Out of Australasia'? Phylogeny, Biogeography, and Divergence Time based on Plastid DNA Sequences.**

In: *Systematic Botany* 33 (3), p. 495–508. DOI: 10.1600/036364408785679806.

**HARPKÉ, DÖRTE; CARTA, ANGELINO; TOMOVIĆ, GORDANA; RANDELOVIĆ, VLADIMIR; RANDELOVIĆ, NOVICA; BLATTNER, FRANK R.; PERUZZI, LORENZO (2015):**

**Phylogeny, karyotype Evolution and Taxonomy of *Crocus series Verni* (Iridaceae).**

In: *Plant Systematics and Evolution* 301 (1), p. 309–325. DOI: 10.1007/s00606-014-1074-0.

**HARPKÉ, DÖRTE; MENG, SHUCHUN; RUTTEN, TWAN; KERNDORFF, HELMUT; BLATTNER, FRANK R. (2013):**

**Phylogeny of *Crocus* (Iridaceae) based on one Chloroplast and two nuclear Loci: ancient Hybridization and Chromosome Number Evolution.**

In: *Molecular Phylogenetics and Evolution* 66 (3), p. 617–627. DOI: 10.1016/j.ympev.2012.10.007.

**HARPKÉ, DÖRTE; PERUZZI, LORENZO; KERNDORFF, HELMUT; KARAMPLIANIS, THEOPHANIS; CONSTANTINIDIS, THEOPHANIS; RANDELOVIĆ, VLADIMIR ET AL. (2014):**

**Phylogeny, geographic Distribution, and new taxonomic Circumscription of the *Crocus reticulatus* Species Group (Iridaceae).**

In: *Turkish Journal of Botany* 38, p. 1182–1198. DOI: 10.3906/bot-1405-60.

- IKINCI, NURSEL; HALL, TONY; LLEDÓ, M. DOLORES; CLARKSON, JAMES J.; TILLIE, NICO; SEISUMS, ARNIS ET AL. (2011):  
Molecular Phylogenetics of the Juno Irises, *Iris* Subgenus *Scorpiris* (Iridaceae), based  
on six Plastid Markers.**  
In: Botanical Journal of the Linnean Society 167 (3), p. 281–300. DOI: 10.1111/j.1095-8339.2011.01176.x.
- KERNDORFF, HELMUT; PASCHE, ERICH; BLATTNER, FRANK R.; HARPKE, DÖRTE (2013):  
Fourteen new Species of *Crocus* (Liliiflorae, Iridaceae) from West, South-West and  
South-Central Turkey.**  
In: Stapfia 99, p. 145–158.
- KOZYRENKO, MARINA M.; ARTYUKOVA, E. V.; ZHURAVLEV, YU. N. (2009):  
Independent Species Status of *Iris vorobievii* N.S.Pavlova, *Iris mandshurica* Maxim.,  
and *Iris humilis* Georgi (Iridaceae): Evidence from the nuclear and Chloroplast  
Genomes.**  
In: Russian Journal of Genetics 45 (11), p. 1394–1402. DOI: 10.1134/S1022795409110143.
- LEE, HYUNJUNG; PARK, SEON-JOO (2013):  
A phylogenetic Study of Korean *Iris* L. based on Plastid DNA (psbA-trnH, trnL-F)  
Sequences.**  
In: Korean Journal of Plant Taxonomy 43 (3), p. 227–235. DOI: 10.11110/kjpt.2013.43.3.227.
- LOVO, JULIANA; WINKWORTH, RICHARD C.; MELLO-SILVA, RENATO (2012):  
New Insights into Trimezieae (Iridaceae) Phylogeny: what do molecular Data tell us?**  
In: Annals of Botany 110 (3), p. 689–702. DOI: 10.1093/aob/mcs127.
- MAKAREVITCH, IRINA; GOLOVNINA, KSENIYA; SCHERBIK, SVETLANA; BLINOV, ALEXANDER G. (2003):  
Phylogenetic Relationships of the Siberian *Iris* Species inferred from Noncoding  
Chloroplast DNA Sequences.**  
In: International Journal of Plant Sciences 164 (2), p. 229–237. DOI: 10.1086/346160.
- MANNING, JOHN C.; FOREST, FÉLIX; VINNERSTEN, ANNIKA (2007):  
The Genus *Colchicum* L. redefined to include *Androcymbium* Willd. based on  
molecular Evidence.**  
In: Taxon 56 (3), p. 872–882. DOI: 10.2307/25065868.
- MANNING, JOHN C.; GOLDBLATT, PETER (2001):  
A synoptic Review of *Romulea* (Iridaceae: Crocoideae) in Sub-Saharan Africa, the  
Arabian Peninsula and Socotra including new Species, biological Notes, and a new  
infrageneric Classification.**  
In: Adansonia 23 (1), p. 59–108.
- MANNING, JOHN C.; GOLDBLATT, PETER (2011):  
Taxonomic Revision of the Genus *Thereianthus* (Iridaceae: Crocoideae).**  
In: Bothalia 41 (2), p. 239–267. DOI: 10.4102/abc.v41i2.56.
- MARTÍNEZ, JORGE; VARGAS, PABLO; LUCEÑO, MODESTO; CUADRADO, ÁNGELES (2010):  
Evolution of *Iris* Subgenus *Xiphium* based on Chromosome Numbers, Fish of nrDNA  
(5s, 45s) and trnL-trnF Sequence Analysis.**  
In: Plant Systematics and Evolution 289 (3-4), p. 223–235. DOI: 10.1007/s00606-010-0345-7.
- MAVRODIEV, EVGENY V.; MARTÍNEZ-AZORÍN, MARIO; DRANISHNIKOV, PETER; CRESPO, MANUEL B. (2014):  
At least 23 Genera instead of one: the case of *Iris* L. s.l. (Iridaceae).**  
In: Public Library of Science One 9 (8), e106459. DOI: 10.1371/journal.pone.0106459.

- MORAES, ANA PAULA; SOUZA-CHIES, TATIANA TEIXEIRA DE; STIEHL-ALVES, EUDES M.; BURCHARDT, PAULA; EGGERS, LILIAN; SILJAK-YAKOVLEV, SONJA ET AL. (2015):**  
**Evolutionary Trends in Iridaceae: new cytogenetic Findings from the New World.**  
 In: Botanical Journal of the Linnean Society 177, p. 27–49.
- PETERSEN, GITTE; SEBERG, OLE; THORSØE, SARAH; JØRGENSEN, TINA; MATHEW, BRIAN (2008):**  
**A Phylogeny of the Genus *Crocus* (Iridaceae) based on Sequence Data from five Plastid Regions.**  
 In: Taxon 57 (2), p. 487–499.
- REEVES, GAIL; CHASE, MARK W.; GOLDBLATT, PETER; RUDALL, PAULA J.; FAY, MICHAEL F.; COX, ANTONY V. ET AL. (2001):**  
**Molecular Systematics of Iridaceae: Evidence from four Plastid DNA Regions.**  
 In: American Journal of Botany 88 (11), p. 2074–2087. DOI: 10.2307/3558433.
- REEVES, GAIL; GOLDBLATT, PETER; RUDALL, PAULA J.; CHASE, MARK W. (2000):**  
**Molecular Systematics of Iridaceae: a combined Analysis of four Plastid DNA Sequence Matrices.**  
 In: Annali di Botanica 58, p. 29–42.
- RYMER, PAUL D.; MANNING, JOHN C.; GOLDBLATT, PETER; POWELL, MARTYN P.; SAVOLAINEN, VINCENT (2010):**  
**Evidence of recent and continuous Speciation in a biodiversity Hotspot: a Population genetic approach in Southern African *Gladioli* (*Gladiolus*; Iridaceae).**  
 In: molecular Ecology 19 (21), p. 4765–4782. DOI: 10.1111/j.1365-294X.2010.04794.x.
- SOUZA-CHIES, TATIANA TEIXEIRA DE; SANTOS, ELIANE KALTCHUK DOS; EGGERS, LILIAN; FLORES, ALICE MAINIERI; ALVES, EUDES M. STIEHL; FACHINETTO, JULIANA ET AL. (2012):**  
**Studies on Diversity and Evolution of Iridaceae Species in Southern Brazil.**  
 In: Genetics and Molecular Biology 35 (4 suppl 1), p. 1027–1035. DOI: 10.1590/S1415-47572012000600018.
- VALENTE, LUIS M.; SAVOLAINEN, VINCENT; MANNING, JOHN C.; GOLDBLATT, PETER; VARGAS, PABLO (2011):**  
**Explaining disparities in Species Richness between Mediterranean floristic Regions: a case Study in *Gladiolus* (Iridaceae).**  
 In: Global Ecology and Biogeography 20 (6), p. 881–892. DOI: 10.1111/j.1466-8238.2010.00644.x.
- WILSON, CAROL A. (2003):**  
**Phylogenetic Relationships in *Iris* Series *Californicae* based on ITS Sequences of Nuclear Ribosomal DNA.**  
 In: Systematic Botany 28 (1), p. 39–46.
- WILSON, CAROL A. (2009):**  
**Phylogenetic Relationships among the recognized Series in *Iris* Section *Limniris*.**  
 In: Systematic Botany 34 (2), p. 277–284. DOI: 10.1600/036364409788606316.
- WILSON, CAROL A. (2011):**  
**Subgeneric Classification in *Iris* re-examined using Chloroplast Sequence Data.**  
 In: Taxon 60 (1), p. 27–35. DOI: 10.1002/tax.601004.
- WILSON, CAROL A.; PADIERNOS, JUSTIN; SAPIR, YUVAL (2016):**  
**The royal Irises (*Iris* Subg. *Iris* Sect. *Oncocyclus*): Plastid and low-copy nuclear Data contribute to an Understanding of their phylogenetic Relationships.**  
 In: Taxon 65 (1), p. 35–46. DOI: 10.12705/651.3.
- YOUNG, NELSON D. (1998):**  
**Pacific Coast *Iris* Species Delimitation using three Species Definitions: biological, phylogenetic and genealogical.**

In: Botanical Journal of the Linnean Society 63 (1), p. 99–120. DOI: 10.1111/j.1095-8312.1998.tb01641.x.

## Iridales

**SEBERG, OLE; PETERSEN, GITTE; DAVIS, JERROLD I.; PIRES, J. CHRIS; STEVENSON, DENNIS WM.; CHASE, MARK W. ET AL. (2012):**

**Phylogeny of the Asparagales based on three Plastid and two mitochondrial Genes.**

In: American Journal of Botany 99 (5), p. 875–889. DOI: 10.3732/ajb.1100468.

## Isoetaceae

**HOOT, SARA B.; NAPIER, NANCY S.; TAYLOR, W. CARL (2004):**

**Revealing unknown or extinct Lineages within *Isoetes* (Isoetaceae) using DNA Sequences from Hybrids.**

In: American Journal of Botany 91 (6), p. 899–904.

**HOOT, SARA B.; TAYLOR, W. CARL; NAPIER, NANCY P. (2006):**

**Phylogeny and Biogeography of *Isoetes* (Isoetaceae) based on Nuclear and Chloroplast DNA Sequence Data.**

In: Systematic Botany 31 (3), p. 449–460.

**KIM, CHANGKYUN; SHIN, HYUNCHUR; CHANG, YUNG-TA; CHOI, HONG-KEUN (2010):**

**Speciation pathway of *Isoetes* (Isoetaceae) in East Asia inferred from molecular phylogenetic Relationships.**

In: American Journal of Botany 97 (6), p. 958–969. DOI: 10.3732/ajb.0900162.

**LARSÉN, EVA; RYDIN, CATARINA (2016):**

**Disentangling the Phylogeny of *Isoetes* (Isoetales), using nuclear and Plastid Data.**

In: International Journal of Plant Sciences 177 (2), p. 157–174. DOI: 10.1086/684179.

**RYDIN, CATARINA; WIKSTRÖM, NIKLAS (2002):**

**Phylogeny of *Isoetes* (Lycopsidea): resolving basal Relationships using rbcL Sequences.**

In: Taxon 51, p. 83–89.

**TROIA, ANGELO; PEREIRA, JOVANI B.; KIM, CHANGKYUN; TAYLOR, W. CARL (2016):**

**The Genus *Isoetes* (Isoetaceae): a provisional Checklist of the accepted and unresolved Taxa.**

In: Phytotaxa 277 (2), p. 101. DOI: 10.11646/phytotaxa.277.2.1.

## Ixioliriaceae

**ZHAO, Y.; LI, Y.; LIU, Y.; YANG, Y. F. (2015):**

**DNA barcoding for efficient Identification of *Ixiolirion* Species (Ixioliriaceae).**

In: Genetics and molecular Research 14 (1), p. 1903–1910. DOI: 10.4238/2015.March.13.19.

## Juglandaceae

**MANOS, PAUL S.; SOLTIS, PAMELA S.; SOLTIS, DOUGLAS E.; MANCHESTER, STEVEN R.; OH, SANG-HUN; BELL, CHARLES D. ET AL. (2007):**

**Phylogeny of extant and fossil Juglandaceae inferred from the Integration of molecular and morphological Data Sets.**

In: Systematic Biology 56 (3), p. 412–430. DOI: 10.1080/10635150701408523.

**MANOS, PAUL S.; STONE, DONALD E. (2001):**

**Evolution, Phylogeny, and Systematics of the Juglandaceae.**

In: Annals of the Missouri Botanical Garden 88, p. 231–269.

**STANFORD, ALICE M.; HARDEN, RACHEL; PARKS, CLIFFORD R. (2000):**

**Phylogeny and Biogeography of *Juglans* (Juglandaceae) based on matK and ITS Sequence Data.**

In: American Journal of Botany 87 (6), p. 872–882. DOI: 10.2307/2656895.

**ZHAO, PENG; ZHOU, HUI-JUAN; POTTER, DANIEL; HU, YI-HENG; FENG, XIAO-JIA; DANG, MENG ET AL. (2018): Population genetics, phylogenomics and hybrid Speciation of *Juglans* in China determined from whole Chloroplast Genomes, Transcriptomes, and Genotyping-by-Sequencing (GBS).**

In: Molecular Phylogenetics and Evolution 126, p. 250–265. DOI: 10.1016/j.ympev.2018.04.014.

## Juglandales

**LI, RUI-QI; CHEN, ZHI-DUAN; LU, AN-MING; SOLTIS, DOUGLAS E.; SOLTIS, PAMELA S.; MANOS, PAUL P. (2004): Phylogenetic Relationships in Fagales based on DNA Sequences from Three Genomes.**

In: International Journal of Plant Sciences 165 (2), p. 311–324. DOI: 10.1086/381920.

## Juncaceae

**DRÁBKOVÁ, LENKA; KIRSCHNER, JAN; VLČEK, ČESTMÍR (2006):**

**Phylogenetic Relationships within *Luzula* DC. and *Juncus* L. (Juncaceae): A Comparison of phylogenetic signals of trnL-trnF intergenic Spacer, trnL Intron and rbcL Plastome Sequence Data.**

In: Cladistics 22 (2), p. 132–143. DOI: 10.1111/j.1096-0031.2006.00095.x.

**DRÁBKOVÁ, LENKA; VLČEK, ČESTMÍR (2007):**

**The phylogenetic Position of *Oxychloe* (Juncaceae): Evidence from Morphology, nuclear and Plastid DNA Regions.**

In: Taxon 56 (1), p. 95–102.

**DRBKOV, L.; KIRSCHNER, JAN; SEBERG, OLE; PETERSEN, GITTE; VLČEK, ČESTMÍR (2003):**

**Phylogeny of the Juncaceae based on rbc L Sequences, with special Emphasis on *Luzula* DC. and *Juncus* L.**

In: Plant Systematics and Evolution 240 (1-4), p. 133–147. DOI: 10.1007/s00606-003-0001-6.

**ROALSON, ERIC H. (2005):**

**Phylogenetic Relationships in the Juncaceae inferred from Nuclear Ribosomal DNA Internal Transcribed Spacer Sequence Data.**

In: International Journal of Plant Sciences 166 (3), p. 397–413.

**ZÁVESKÁ DRÁBKOVÁ, LENKA; VLČEK, ČESTMÍR (2009):**

**DNA Variation within Juncaceae: Comparison of impact of Organelle Regions on Phylogeny.**

In: Plant Systematics and Evolution 278 (3-4), p. 169–186. DOI: 10.1007/s00606-008-0135-7.

**ZÁVESKÁ DRÁBKOVÁ, LENKA; VLČEK, ČESTMÍR (2010):**

**Molecular Phylogeny of the Genus *Luzula* DC. (Juncaceae, Monocotyledones) based on plastome and nuclear ribosomal Regions: a Case of Incongruence, incomplete Lineage Sorting and Hybridisation.**

In: Molecular Phylogenetics and Evolution 57 (2), p. 536–551. DOI: 10.1016/j.ympev.2010.07.022.

## Juncaginaceae

**MERING, SABINE; KADEREIT, JOACHIM W. (2015):**

**Phylogeny, Biogeography and Evolution of *Triglochin* L. (Juncaginaceae) - morphological Diversification is linked to Habitat Shifts rather than to genetic Diversification.**

In: *Molecular Phylogenetics and Evolution* 83, p. 200–212. DOI: 10.1016/j.ympev.2014.10.014.

**Kewaceae**

CHRISTENHUSZ, MAARTEN J.M.; BROCKINGTON, SAMUEL F.; CHRISTIN, PASCAL-ANTOINE; SAGE, ROWAN F. (2014):  
**On the disintegration of Molluginaceae: a new Genus and Family (*Kewa*, Kewaceae) segregated from *Hypertelis*, and Placement of *Macarthuria* in Macarthuraceae.**

In: *Phytotaxa* 181 (4), p. 238. DOI: 10.11646/phytotaxa.181.4.4.

**Koeberliniaceae**

TOBE, HIROSHI; RAVEN, PETER H. (2008):

**Embryology of *Koeberlinia* (Koeberliniaceae): Evidence for Core-Brassicalean Affinities.**

In: *American Journal of Botany* 95 (11), p. 1475–1486. DOI: 10.3732/ajb.0800218.

**Krameriaceae**

SIMPSON, BERYL B.; WEEKS, ANDREA; HELFGOTT, D. MEGAN; LARKIN, LEAH L. (2004):

**Species Relationships in *Krameria* (Krameriaceae) based on ITS Sequences and Morphology: Implications for Character Utility and Biogeography.**

In: *Systematic Botany* 29 (1), p. 97–108. DOI: 10.1600/036364404772974013.

**Lamiaceae**

AGOSTINI, G.; ECHEVERRIGARAY, S.; SOUZA-CHIES, TATIANA TEIXEIRA DE (2012):

**A preliminary Phylogeny of the Genus *Cunila* D. Royen ex L. (Lamiaceae) based on ITS rDNA and trnL-F Regions.**

In: *Molecular Phylogenetics and Evolution* 65 (2), p. 739–747. DOI: 10.1016/j.ympev.2012.07.030.

AGOSTINI, G.; ECHEVERRIGARAY, S.; SOUZA-CHIES, TATIANA TEIXEIRA DE (2008):

**Genetic Relationships among South American Species of *Cunila* D. Royen ex L. based on I SSR.**

In: *Plant Systematics and Evolution* 274 (3-4), p. 135–141. DOI: 10.1007/s00606-008-0037-8.

BARBER, JANET C.; FINCH, COURTNEY C.; FRANCISCO-ORTEGA, JAVIER; SANTOS-GUERRA, ARNOLDO; JANSEN, ROBERT K. (2007):

**Hybridization in Macaronesian *Sideritis* (Lamiaceae): Evidence from incongruence of multiple independent Nuclear and Chloroplast Sequence Datasets.**

In: *Taxon* 56 (1), p. 74–88.

BARBER, JANET C.; FRANCISCO-ORTEGA, JAVIER; SANTOS-GUERRA, ARNOLDO; TURNER, KATHRYN G.; JANSEN, ROBERT K. (2002):

**Origin of Macaronesian *Sideritis* L. (Lamioideae: Lamiaceae) inferred from nuclear and Chloroplast Sequence Datasets.**

In: *Molecular Phylogenetics and Evolution* 23, p. 293–306.

BARRABÉ, LAURE; KARNADI-ABDELKADER, GILIANE; OUNEMOA, JACQUELINE; KOK, ROGIER P.J. DE; ROBERT, NADIA; GATEBLE, GILDAS (2015):

**Recircumscription of *Oxera* (Lamiaceae: Ajugoideae) to include *Faradaya* based on molecular and anatomical Data.**

In: *Botanical Journal of the Linnean Society* 179, p. 693–711.

BENDIKSBY, MIKA; BRYSTING, ANNE K.; THORBEEK, LISBETH; GUSSAROVA, GALINA; RYDING, OLOF (2011):

**Molecular Phylogeny and Taxonomy of the Genus *Lamium* L. (Lamiaceae):  
Disentangling Origins of presumed Allotetraploids.**

In: *Taxon* 60 (4), p. 986–1000.

**BENDIKSBY, MIKA; SALMAKI, YASAMAN; BRÄUCHLER, CHRISTIAN; RYDING, OLOF (2014):**

**The generic Position of *Stachys tibetica* Vatke and Amalgamation of the Genera  
*Eriophyton* and *Stachyopsis* (Lamiaceae Subfam. Lamioideae).**

In: *Plant Systematics and Evolution* 300 (5), p. 961–971. DOI: 10.1007/s00606-013-0935-2.

**BENDIKSBY, MIKA; THORBEC, LISBETH; SCHEEN, ANNE-CATHRINE; LINDQVIST, CHARLOTTE; RYDING, OLOF (2011):**

**An updated Phylogeny and Classification of Lamiaceae Subfamily Lamioideae.**

In: *Taxon* 60 (2), p. 471–484.

**BRAMLEY, GEMMA L.C.; FOREST, FÉLIX; KOK, ROGIER P.J. DE (2009):**

**Troublesome tropical Mints: re-examining generic Limits of *Vitex* and Relations  
(Lamiaceae) in South East Asia.**

In: *Taxon* 58 (2), p. 500–510.

**BRÄUCHLER, CHRISTIAN; MEIMBERG, HARALD; ABELE, TILMAN; HEUBL, GÜNTHER (2005):**

**Polyphyly of the Genus *Micromeria* (Lamiaceae) as Evidence from cpDNA Sequence  
Data.**

In: *Taxon* 54 (3), p. 639–650.

**BRÄUCHLER, CHRISTIAN; MEIMBERG, HARALD; HEUBL, GÜNTHER (2010):**

**Molecular Phylogeny of Menthinae (Lamiaceae, Nepetoideae, Mentheae) -  
Taxonomy, Biogeography and Conflicts.**

In: *Molecular Phylogenetics and Evolution* 55 (2), p. 501–523. DOI: 10.1016/j.ympev.2010.01.016.

**CAROVIĆ-STANKO, KLAUDIJA; LIBER, ZLATKO; BESENDORFER, VIŠNJA; JAVORNIK, BRANKA; BOHANEC, BORUT; KOLAK,  
IVAN; SATOVIĆ, ZLATKO (2010):**

**Genetic relations among Basil Taxa (*Ocimum* L.) based on molecular Markers, nuclear  
DNA content, and Chromosome Number.**

In: *Plant Systematics and Evolution* 285 (1-2), p. 13–22. DOI: 10.1007/s00606-009-0251-z.

**CHEN, YA-PING; DREW, BRYAN T.; LI, BO; SOLTIS, DOUGLAS E.; SOLTIS, PAMELA S.; XIANG, CHUN-LEI (2016):**

**Resolving the phylogenetic Position of *Ombrocharis* (Lamiaceae), with Reference to  
the molecular Phylogeny of Tribe Elsholtzieae.**

In: *Taxon* 65 (1), p. 123–136. DOI: 10.12705/651.8.

**CHEN, YA-PING; LI, BO; OLMSTEAD, RICHARD G.; CANTINO, PHILIP D.; LIU, EN-DE; XIANG, CHUN-LEI (2014):**

**Phylogenetic Placement of the enigmatic Genus *Holocheila* (Lamiaceae) inferred  
from Plastid DNA Sequences.**

In: *Taxon* 63 (2), p. 355–366. DOI: 10.12705/632.8.

**CONN, BARRY J.; HENWOOD, MURRAY J.; PROFT, KIRSTIN M.; WILSON, TREVOR C. (2016):**

**Molecular Phylogenetics reveals a new Species of *Prostanthera* from tropical  
Queensland with links to more southerly Taxa.**

In: *Telopea* 19, p. 13–22. DOI: 10.7751/telopea10037.

**CONN, BARRY J.; HENWOOD, MURRAY J.; STREIBER, N. (2011):**

**Synopsis of the Tribe Chloantheae and new nomenclatural Combinations in *Pityrodia*  
s.lat. (Lamiaceae).**

In: *Australian Systematic Botany* 24 (1), p. 1–9. DOI: 10.1071/SB10039.

**CONN, BARRY J.; STREIBER, N.; BROWN, E. A.; HENWOOD, MURRAY J.; OLMSTEAD, RICHARD G. (2009):**

**Infrageneric Phylogeny of Chloantheae (Lamiaceae) based on Chloroplast ndhF and nuclear ITS Sequence Data.**

In: Australian Systematic Botany 22 (4), p. 243–256. DOI: 10.1071/SB09011.

**CURTO, MANUEL; SCHACHTLER, CHRISTINA; PUPPO, PAMELA; MEIMBERG, HARALD (2018):**

**Using a new RAD-Sequencing approach to Study the Evolution of *Micromeria* in the Canary Islands.**

In: Molecular Phylogenetics and Evolution 119, p. 160–169. DOI: 10.1016/j.ympev.2017.11.005.

**DIZKIRICI, AYTEN; CELEP, FERHAT; KANSU, CIGDEM; KAHRAMAN, AHMET; DOGAN, MUSA; KAYA, ZEKI (2015):**

**A molecular Phylogeny of *Salvia euphratica* sensu lato (*Salvia* L., Lamiaceae) and its closely related Species with a Focus on the Section *Hymenosphace*.**

In: Plant Systematics and Evolution 301 (10), p. 2313–2323. DOI: 10.1007/s00606-015-1230-1.

**DREW, BRYAN T.; SYTSMA, KENNETH J. (2012):**

**Phylogenetics, Biogeography, and staminal Evolution in the Tribe Mentheae (Lamiaceae).**

In: American Journal of Botany 99 (5), p. 933–953. DOI: 10.3732/ajb.1100549.

**DREW, BRYAN T.; SYTSMA, KENNETH J. (2013):**

**The South American Radiation of *Lepechinia* (Lamiaceae): Phylogenetics, Divergence times and Evolution of Dioecy.**

In: Botanical Journal of the Linnean Society 171, p. 171–190.

**EDWARDS, CHRISTINE E.; LEFKOWITZ, DAVID; SOLTIS, DOUGLAS E.; SOLTIS, PAMELA P. (2008):**

**Phylogeny of *Conradina* and related Southeastern Scrub Mints (Lamiaceae) based on GapC Gene Sequences.**

In: International Journal of Plant Sciences 169 (4), p. 579–594. DOI: 10.1086/528758.

**EDWARDS, CHRISTINE E.; SOLTIS, DOUGLAS E.; SOLTIS, PAMELA P. (2006):**

**Molecular Phylogeny of *Conradina* and Other Scrub Mints (Lamiaceae) from the Southeastern USA: Evidence for Hybridization in Pleistocene Refugia?**

In: Systematic Botany 31 (1), p. 193–207.

**FRAGOSO-MARTÍNEZ, ITZI; SALAZAR, GERARDO A.; MARTÍNEZ-GORDILLO, MARTHA; MAGALLÓN, SUSANA; SÁNCHEZ-REYES, LUNA L.; MORIARTY LEMMON, EMILY ET AL. (2017):**

**A pilot Study applying the plant anchored Hybrid Enrichment Method to New World Sages (*Salvia* Subgenus *Calosphace*; Lamiaceae).**

In: Molecular Phylogenetics and Evolution 117, p. 124–134. DOI: 10.1016/j.ympev.2017.02.006.

**GUERIN, G. R. (2009):**

**A Revision of *Westringia* Section *Cephalowestringia* (Lamiaceae: Westringieae).**

In: Australian Systematic Botany 22 (2), p. 121–136. DOI: 10.1071/SB08030.

**HARLEY, RAYMOND MERVYN (2012):**

**Checklist and key of Genera and Species of the Lamiaceae of the Brazilian Amazon.**

In: Rodriguésia 63 (1), p. 129–144.

**HARLEY, RAYMOND MERVYN (2014):**

**Four new Taxa of *Oocephalus* (Hyptidinae: Lamiaceae) from Bahia, Brazil.**

In: Kew Bulletin 69 (4), p. 9539. DOI: 10.1007/S12225-014-9539-4.

**HARLEY, RAYMOND MERVYN; PASTORE, JOSÉ FLORIANO B. (2012):**

**A generic Revision and new Combinations in the Hyptidinae (Lamiaceae), based on molecular and morphological Evidence.**



In: *Phytotaxa* 58, p. 1–55.

HUANG, MINGJUAN; CRAWFORD, DANIEL J.; FREUDENSTEIN, JOHN V.; CANTINO, PHILIP D. (2008):

**Systematics of *Trichostema* (Lamiaceae): Evidence from ITS, *ndhF*, and Morphology.**

In: *Systematic Botany* 33 (2), p. 437–446.

JAMZAD, ZIBA; CHASE, MARK W.; INGROUILLE, MARTIN J.; SIMMONDS, MONIQUE P. J.; JALILI, ADEL (2003):

**Phylogenetic Relationships in *Nepeta* L. (Lamiaceae) and related Genera based on ITS Sequence Data.**

In: *Taxon* 52, p. 21–32.

JENKS, AARON A.; WALKER, JAY B.; KIM, SEUNG-CHUL (2013):

**Phylogeny of New World *Salvia* Subgenus *Calosphace* (Lamiaceae) based on cpDNA (*psbA-trnH*) and nrDNA (ITS) Sequence Data.**

In: *Journal of Plant Research* 126 (4), p. 483–496. DOI: 10.1007/s10265-012-0543-1.

KOK, ROGIER P.J. DE (2012):

**A Revision of the Genus *Gmelina* (Lamiaceae).**

In: *Kew Bulletin* 67, p. 293–329.

LI, BO; CANTINO, PHILIP D.; OLMSTEAD, RICHARD G.; BRAMLEY, GEMMA L.C.; XIANG, CHUN-LEI; MA, ZHONG-HUI ET AL. (2016):

**A large-scale Chloroplast Phylogeny of the Lamiaceae sheds new light on its subfamilial Classification.**

In: *Scientific Reports* 6, p. 34343. DOI: 10.1038/srep34343.

LI, BO; XU, WEIXIANG; TU, TIE-YAO; WANG, ZHONGSHENG; OLMSTEAD, RICHARD G.; PENG, HUA ET AL. (2012):

**Phylogenetic Position of *Wenchengia* (Lamiaceae): A Taxonomically enigmatic and critically endangered Genus.**

In: *Taxon* 61 (2), p. 392–401.

LI, QIAN-QUAN; LI, MIN-HUI; YUAN, QING-JUN; CUI, ZHAN-HU; HUANG, LU-QI; XIAO, PEI-GEN (2013):

**Phylogenetic Relationships of *Salvia* (Lamiaceae) in China: Evidence from DNA Sequence Datasets.**

In: *Journal of Systematics and Evolution* 51 (2), p. 184–195. DOI: 10.1111/j.1759-6831.2012.00232.x.

LINDQVIST, CHARLOTTE (2003):

**Cladogenesis and reticulation in the Hawaiian endemic Mints (Lamiaceae).**

In: *Cladistics* 19 (6), p. 480–495. DOI: 10.1016/j.cladistics.2003.09.003.

LINDQVIST, CHARLOTTE; ALBERT, VICTOR A. (2002):

**Origin of the Hawaiian endemic Mints within North American *Stachys* (Lamiaceae).**

In: *American Journal of Botany* 89 (10), p. 1709–1724.

MAKI, MASAYUKI; YAMASHIRO, TADASHI; DOHZONO, IKUMI; SUZUKI, KAZUO (2010):

**Molecular Phylogeny of *Isodon* (Lamiaceae) in Japan using Chloroplast DNA Sequences: recent rapid Radiations or ancient introgressive Hybridization?**

In: *Plant Species Biology* 25 (3), p. 240–248. DOI: 10.1111/j.1442-1984.2010.00290.x.

MATHIESEN, CECILIE; SCHEEN, ANNE-CATHRINE; LINDQVIST, CHARLOTTE (2011):

**Phylogeny and Biogeography of the Lamioid Genus *Phlomis* (Lamiaceae).**

In: *Kew Bulletin* 66, p. 83–99.

MEIMBERG, HARALD; ABELE, TILMAN; BRÄUCHLER, CHRISTIAN; MCKAY, JOHN K.; PÉREZ DE PAZ, PEDRO LUIS; HEUBL, GÜNTHER (2006):

**Molecular Evidence for adaptive Radiation of *Micromeria* Benth. (Lamiaceae) on the Canary Islands as inferred from Chloroplast and nuclear DNA Sequences and ISSR fingerprint Data.**

In: Molecular Phylogenetics and Evolution 41 (3), p. 566–578. DOI: 10.1016/j.ympev.2006.05.037.

**MENG, HONG-HU; ZHANG, MING-LI (2013):**

**Diversification of Plant Species in arid Northwest China: species-level phylogeographical History of *Lagochilus* Bunge ex Benthham (Lamiaceae).**

In: Molecular Phylogenetics and Evolution 68 (3), p. 398–409. DOI: 10.1016/j.ympev.2013.04.012.

**MOON, HYE-KYOUNG; FLS, SUK-PYO HONG; FLS, ERIK SMETS; HUYSMANS, SUZY (2009):**

**Phylogenetic Significance of Leaf Micromorphology and Anatomy in the Tribe Mentheae (Nepetoideae: Lamiaceae).**

In: Botanical Journal of the Linnean Society 160, p. 211–231.

**MOON, HYE-KYOUNG; SMETS, ERIK; HUYSMANS, SUZY (2010):**

**Phylogeny of Tribe Mentheae (Lamiaceae): the story of Molecules and Micromorphological characters.**

In: Taxon 59 (4), p. 1065–1076.

**MOON, HYE-KYOUNG; VINCKIER, STEFAN; WALKER, JAY B.; SMETS, ERIK; HUYSMANS, SUZY (2008):**

**A Search for phylogenetically Informative Pollen Characters in the Subtribe Salviinae (Mentheae: Lamiaceae).**

In: International Journal of Plant Sciences 169 (3), p. 455–471. DOI: 10.1086/526463.

**O'LEARY, NATALY (2015):**

**Synopsis of Subtribe Hyptidinae (Lamiaceae) in Argentina.**

In: Phytotaxa 233 (3), p. 201. DOI: 10.11646/phytotaxa.233.3.1.

**OTIENO, DONALD F.; BALKWILL, KEVIN; PATON, ALAN J.; SAVOLAINEN, VINCENT (2006):**

**A reassessment of *Hemizygia* and *Syncolostemon* (Ocimeae-Lamiaceae).**

In: Taxon 55 (4), p. 941–958.

**PAN, YUE-ZHI; FANG, LI-QIN; HAO, GANG; CAI, JIE; GONG, XUN (2009):**

**Systematic Positions of *Lamiophlomis* and *Paraphlomis* (Lamiaceae) based on nuclear and Chloroplast Sequences.**

In: Journal of Systematics and Evolution 47 (6), p. 535–542. DOI: 10.1111/j.1759-6831.2009.00050.x.

**PASTORE, JOSÉ FLORIANO B.; HARLEY, RAYMOND MERVYN; FOREST, FÉLIX; PATON, ALAN J.; VAN DEN BERG, CÁSSIO (2011):**

**Phylogeny of the Subtribe Hyptidinae (Lamiaceae Tribe Ocimeae) as inferred from nuclear and Plastid DNA.**

In: Taxon 60 (5), p. 1317–1329.

**PATON, ALAN J.; SPRINGATE, DAVID; SUDDEE, SOMRAN; OTIENO, DONALD F.; GRAYER, RENÉE J.; HARLEY, MADELINE M. ET AL. (2004):**

**Phylogeny and Evolution of Basils and Allies (Ocimeae, Labiatae) based on three Plastid DNA Regions.**

In: Molecular Phylogenetics and Evolution 31 (1), p. 277–299. DOI: 10.1016/j.ympev.2003.08.002.

**PEIRSON, JESS A.; CANTINO, PHILIP D.; JR., HARVEY E. BALLARD (2006):**

**A taxonomic Revision of *Collinsonia* (Lamiaceae) based on phenetic Analyses of morphological Variation.**

In: Systematic Botany 31 (2), p. 398–409.

- POLLARD, BENEDICT JOHN; PATON, ALAN J. (2009):  
**The African *Plectranthus* (Lamiaceae) Expansion continues. Vale Leocus!**  
In: Kew Bulletin 64, p. 259–261.
- PUPPO, PAMELA; CURTO, MANUEL; GUSMÃO-GUEDES, JOANA; COCHFEL, JAQUELINE; PÉREZ DE PAZ, PEDRO LUIS; BRÄUCHLER, CHRISTIAN; MEIMBERG, HARALD (2015):  
**Molecular Phylogenetics of *Micromeria* (Lamiaceae) in the Canary Islands, Diversification and inter-Island Colonization Patterns inferred from nuclear Genes.**  
In: Molecular Phylogenetics and Evolution 89, p. 160–170. DOI: 10.1016/j.ympev.2015.04.017.
- ROY, TILOTTAMA; CHANG, TIEN-HAO; LAN, TIANYING; LINDQVIST, CHARLOTTE (2013):  
**Phylogeny and Biogeography of New World Stachydeae (Lamiaceae) with Emphasis on the Origin and Diversification of Hawaiian and South American Taxa.**  
In: Molecular Phylogenetics and Evolution 69 (1), p. 218–238. DOI: 10.1016/j.ympev.2013.05.023.
- ROY, TILOTTAMA; COLE, LOGAN W.; CHANG, TIEN-HAO; LINDQVIST, CHARLOTTE (2015):  
**Untangling reticulate evolutionary Relationships among New World and Hawaiian Mints (Stachydeae, Lamiaceae).**  
In: Molecular Phylogenetics and Evolution 89, p. 46–62. DOI: 10.1016/j.ympev.2015.03.023.
- ROY, TILOTTAMA; LINDQVIST, CHARLOTTE (2015):  
**New Insights into evolutionary Relationships within the Subfamily Lamioideae (Lamiaceae) based on Pentatricopeptide Repeat (PPR) nuclear DNA Sequences.**  
In: American Journal of Botany 102 (10), p. 1721–1735. DOI: 10.3732/ajb.1500233.
- SALMAKI, YASAMAN; BENDIKSBY, MIKA; HEUBL, GÜNTHER (2015):  
**Molecular Phylogeny confirms the Placement of enigmatic *Stachys persepolitana* in *Lamium* (Lamiaceae; Subfam. Lamioideae).**  
In: Phytotaxa 192 (4), p. 254. DOI: 10.11646/phytotaxa.192.4.3.
- SALMAKI, YASAMAN; KATTARI, STEFAN; HEUBL, GÜNTHER; BRÄUCHLER, CHRISTIAN (2016):  
**Phylogeny of non-monophyletic *Teucrium* (Lamiaceae: Ajugoideae): Implications for Character Evolution and Taxonomy.**  
In: Taxon 65 (4), p. 805–822. DOI: 10.12705/654.8.
- SALMAKI, YASAMAN; ZARRE, SHAHIN; GOVAERTS, RAFAEL; BRÄUCHLER, CHRISTIAN (2012):  
**A taxonomic Revision of the Genus *Stachys* (Lamiaceae: Lamioideae) in Iran.**  
In: Botanical Journal of the Linnean Society 170, p. 573–617.
- SALMAKI, YASAMAN; ZARRE, SHAHIN; LINDQVIST, CHARLOTTE; HEUBL, GÜNTHER; BRÄUCHLER, CHRISTIAN (2011):  
**Comparative Leaf Anatomy of *Stachys* (Lamiaceae: Lamioideae) in Iran with a Discussion on its subgeneric Classification.**  
In: Plant Systematics and Evolution 294 (1-2), p. 109–125. DOI: 10.1007/s00606-011-0450-2.
- SALMAKI, YASAMAN; ZARRE, SHAHIN; RYDING, OLOF; LINDQVIST, CHARLOTTE; BRÄUCHLER, CHRISTIAN; HEUBL, GÜNTHER ET AL. (2013):  
**Molecular Phylogeny of Tribe Stachydeae (Lamiaceae Subfamily Lamioideae).**  
In: Molecular Phylogenetics and Evolution 69 (3), p. 535–551. DOI: 10.1016/j.ympev.2013.07.024.
- SALMAKI, YASAMAN; ZARRE, SHAHIN; RYDING, OLOF; LINDQVIST, CHARLOTTE; SCHEUNERT, AGNES; BRÄUCHLER, CHRISTIAN; HEUBL, GÜNTHER (2012):  
**Phylogeny of the Tribe Phlomideae (Lamioideae: Lamiaceae) with special Focus on *Eremostachys* and *Phlomoïdes*: new Insights from nuclear and Chloroplast Sequences.**  
In: Taxon 61 (1), p. 161–179.

- SCHEEN, ANNE-CATHRINE; ALBERT, VICTOR A. (2009):  
**Molecular Phylogenetics of the *Leucas* Group (Lamioideae; Lamiaceae).**  
In: Systematic Botany 34 (1), p. 173–181. DOI: 10.1600/036364409787602366.
- SCHEEN, ANNE-CATHRINE; BENDIKSBY, MIKA; RYDING, OLOF; MATHIESEN, CECILIE; ALBERT, VICTOR A.; LINDQVIST, CHARLOTTE (2010):  
**Molecular Phylogenetics, Character Evolution, and Suprageneric Classification of Lamioideae (Lamiaceae).**  
In: Annals of the Missouri Botanical Garden 97 (2), p. 191–217. DOI: 10.3417/2007174.
- SCHEEN, ANNE-CATHRINE; LINDQVIST, CHARLOTTE; FOSSDAL, CARL G.; ALBERT, VICTOR A. (2008):  
**Molecular Phylogenetics of Tribe Synandreae, a North American Lineage of Lamioid Mints (Lamiaceae).**  
In: Cladistics 24 (3), p. 299–314. DOI: 10.1111/j.1096-0031.2007.00180.x.
- SCHMIDT-LEBUHN, ALEXANDER N. (2008):  
**Monophyly and phylogenetic Relationships of *Minthostachys* (Labiatae, Nepetoideae) examined using morphological and nrITS Data.**  
In: Plant Systematics and Evolution 270 (1-2), p. 25–38. DOI: 10.1007/s00606-007-0598-y.
- SHEPHERD, KELLY A.; PERKINS, ANDREW J.; COLLINS, JOEL; BYRNE, MARGARET; THIELE, KEVIN R. (2013):  
**Morphological and molecular Evidence supports the Recognition of a new Subspecies of the critically endangered *Pityrodia scabra* (Lamiaceae).**  
In: Australian Systematic Botany 26 (1), p. 1–12. DOI: 10.1071/SB12009.
- STEANE, DOROTHY A.; KOK, ROGIER P.J. DE; OLMSTEAD, RICHARD G. (2004):  
**Phylogenetic Relationships between *Clerodendrum* (Lamiaceae) and other Ajugoid Genera inferred from nuclear and Chloroplast DNA Sequence Data.**  
In: Molecular Phylogenetics and Evolution 32 (1), p. 39–45. DOI: 10.1016/j.ympev.2003.11.011.
- STEANE, DOROTHY A.; SCOTLAND, ROBERT W.; MABBERLEY, DAVID J.; OLMSTEAD, RICHARD G. (1999):  
**Molecular Systematics of *Clerodendrum* (Lamiaceae): ITS Sequences and total Evidence.**  
In: American Journal of Botany 86 (1), p. 98–107.
- TURNER, IAN M. (2014):  
**A new Combination in Asian *Clinopodium* (Lamiaceae).**  
In: Phytotaxa 174 (4), p. 242. DOI: 10.11646/phytotaxa.174.4.6.
- WALKER, JAY B.; SYTSMA, KENNETH J. (2007):  
**Staminal Evolution in the Genus *Salvia* (Lamiaceae): molecular phylogenetic Evidence for multiple Origins of the staminal Lever.**  
In: Annals of Botany 100 (2), p. 375–391. DOI: 10.1093/aob/mcl176.
- WALKER, JAY B.; SYTSMA, KENNETH J.; TREUTLEIN, JENS; WINK, MICHAEL (2004):  
***Salvia* (Lamiaceae) is not monophyletic: Implications for the Systematics, Radiation, and Ecological Specializations of *Salvia* and Tribe Mentheae.**  
In: American Journal of Botany 91 (7), p. 1115–1125.
- WEARN, JAMES A.; MABBERLEY, DAVID J. (2011):  
***Clerodendrum* (Lamiaceae) in Borneo.**  
In: Systematic Botany 36 (4), p. 1050–1061. DOI: 10.1600/036364411X605056.
- WELCH, ANDREANNA J.; COLLINS, KATHERINE; RATAN, AAKROSH; DRAUTZ-MOSES, DANIELA I.; SCHUSTER, STEPHAN C.; LINDQVIST, CHARLOTTE (2016):

**The quest to resolve recent Radiations: Plastid Phylogenomics of extinct and endangered Hawaiian endemic Mints (Lamiaceae).**

In: *Molecular Phylogenetics and Evolution* 99, p. 16–33. DOI: 10.1016/j.ympev.2016.02.024.

**WILL, MARIA; CLABEN-BOCKHOFF, REGINE (2014):**

**Why Africa matters: Evolution of Old World *Salvia* (Lamiaceae) in Africa.**

In: *Annals of Botany* 114 (1), p. 61–83. DOI: 10.1093/aob/mcu081.

**WILL, MARIA; CLABEN-BOCKHOFF, REGINE (2017):**

**Time to split *Salvia* s.l. (Lamiaceae) - new Insights from Old World *Salvia* Phylogeny.**

In: *Molecular Phylogenetics and Evolution* 109, p. 33–58. DOI: 10.1016/j.ympev.2016.12.041.

**WILSON, TREVOR C.; CONN, BARRY J.; HENWOOD, MURRAY J. (2012):**

**Molecular Phylogeny and Systematics of *Prostanthera* (Lamiaceae).**

In: *Australian Systematic Botany* 25 (5), p. 341–352. DOI: 10.1071/SB12006.

**XIANG, CHUN-LEI; ZHANG, QIANG; SCHEEN, ANNE-CATHRINE; CANTINO, PHILIP D.; FUNAMOTO, TSUNEO; PENG, HUA (2013):**

**Molecular Phylogenetics of *Chelonopsis* (Lamiaceae: Gomphostemmatae) as inferred from nuclear and Plastid DNA and Morphology.**

In: *Taxon* 62 (2), p. 375–386.

**YAO, GANG; DREW, BRYAN T.; YI, TING-SHUANG; YAN, HAI-FEI; YUAN, YONG-MING; GE, XUE-JUN (2016):**

**Phylogenetic Relationships, Character Evolution and biogeographic Diversification of *Pogostemon* s.l. (Lamiaceae).**

In: *Molecular Phylogenetics and Evolution* 98, p. 184–200. DOI: 10.1016/j.ympev.2016.01.020.

**YU, XIANG-QIN; MAKI, MASAYUKI; DREW, BRYAN T.; PATON, ALAN J.; LI, HSI-WEN; ZHAO, JIAN-LI ET AL. (2014):**

**Phylogeny and historical Biogeography of *Isodon* (Lamiaceae): rapid Radiation in south-west China and Miocene overland Dispersal into Africa.**

In: *Molecular Phylogenetics and Evolution* 77, p. 183–194. DOI: 10.1016/j.ympev.2014.04.017.

**YUAN, YAO-WU; MABBERLEY, DAVID J.; STEANE, DOROTHY A.; OLMSTEAD, RICHARD G. (2010):**

**Further disintegration and redefinition of *Clerodendrum* (Lamiaceae): Implications for the Understanding of the Evolution of an intriguing breeding Strategy.**

In: *Taxon* 59 (1), p. 125–133.

**ZHONG, JIN-SHUN; LI, JIE; LI, LANG; CONRAN, JOHN G.; LI, HSI-WEN (2010):**

**Phylogeny of *Isodon* (Schr. ex Benth.) Spach (Lamiaceae) and related Genera inferred from Nuclear Ribosomal ITS, trnL–trnF Region, and rps16 Intron Sequences and Morphology.**

In: *Systematic Botany* 35 (1), p. 207–219. DOI: 10.1600/036364410790862614.

## Lamiales

**WORTLEY, ALEXANDRA H.; RUDALL, PAULA J.; HARRIS, DAVID J.; SCOTLAND, ROBERT W. (2005):**

**How much Data are needed to resolve a difficult Phylogeny?: case Study in Lamiales.**

In: *Systematic Biology* 54 (5), p. 697–709. DOI: 10.1080/10635150500221028.

## Lamiidae

**REFULIO-RODRIGUEZ, NANCY F.; OLMSTEAD, RICHARD G. (2014):**

**Phylogeny of Lamiidae.**

In: *American Journal of Botany* 101 (2), p. 287–299. DOI: 10.3732/ajb.1300394.

## Lardizabalaceae

**TIAN, SHUANG; LEI, SHU-QING; HU, WAN; DENG, LING-LI; LI, BO; MENG, QING-LIN ET AL. (2015):**

**Repeated range expansions and inter-/postglacial Recolonization routes of *Sargentodoxa cuneata* (Oliv.) Rehd. et Wils. (Lardizabalaceae) in subtropical China revealed by Chloroplast Phylogeography.**

In: *Molecular Phylogenetics and Evolution* 85, p. 238–246. DOI: 10.1016/j.ympev.2015.02.016.

## **Lauraceae**

**ALVES, FLAVIO MACEDO; SOUZA, VINICIUS CASTRO (2013):**

**Phylogenetic Analysis of the Neotropical Genus *Mezilaurus* and Reestablishment of *Clinostemon* (Lauraceae).**

In: *Taxon* 62 (2), p. 281–290.

**CHANDERBALI, ANDRÉ S.; VAN DER WERFF, HENK; RENNER, SUSANNE P. (2001):**

**Phylogeny and historical Biogeography of Lauraceae: Evidence from the Chloroplast and nuclear Genomes.**

In: *Annals of the Missouri Botanical Garden* 88, p. 104–134.

**FIJRIDIYANTO, IZU A.; MURAKAMI, NORIAKI (2009):**

**Molcecular Systematics of Malesian *Litsea* Lam. and putative related Genera (Lauraceae).**

In: *Acta Phytotaxonomica Geobotanica* 60 (1), p. 1–18.

**FIJRIDIYANTO, IZU A.; MURAKAMI, NORIAKI (2009):**

**Phylogeny of *Litsea* and related Genera (Laureae-Lauraceae) based on Analysis of rpb2 Gene Sequences.**

In: *Journal of Plant Research* 122 (3), p. 283–298. DOI: 10.1007/s10265-009-0218-8.

**HUANG, JIAN-FENG; LI, LANG; CONRAN, JOHN G.; LI, JIE (2016):**

**Phylogenetic Utility of Leafy Gene in *Cinnamomum* (Lauraceae): Gene Duplication and Polymerase Chain Reaction-mediated recombination.**

In: *Journal of Systematics and Evolution* 54 (3), p. 238–249. DOI: 10.1111/jse.12189.

**HUANG, JIAN-FENG; LI, LANG; VAN DER WERFF, HENK; LI, HSI-WEN; ROHWER, JENS GUNTER; CRAYN, DARREN M. ET AL. (2016):**

**Origins and Evolution of Cinnamon and Camphor: A phylogenetic and historical biogeographical Analysis of the *Cinnamomum* Group (Lauraceae).**

In: *Molecular Phylogenetics and Evolution* 96, p. 33–44. DOI: 10.1016/j.ympev.2015.12.007.

**JULIA, S.; SOEPADMO, E.; YAHUD, W. (2009):**

**Problem in the generic Delimitation between *Alseodaphne*, *Dehaasia* and *Nothaphoebe* (Lauraceae) in Borneo.**

In: *Blumea* 54 (1), p. 192–197. DOI: 10.3767/000651909X476148.

**KOKUBUGATA, GORO; NAKAMURA, KOH; FORSTER, PAUL I.; WILSON, GARY W.; HOLLAND, AILSA E.; HIRAYAMA, YUMIKO; YOKOTA, MASATSUGU (2012):**

***Cassytha pubescens* and *C. glabella* (Lauraceae) are not disjunctly distributed between Australia and the Ryukyu Archipelago of Japan - Evidence from morphological and molecular Data.**

In: *Australian Systematic Botany* 25 (5), p. 364–373. DOI: 10.1071/SB10040.

**LI, JIE; CHRISTOPHEL, DAVID C. (2000):**

**Systematic Relationships within the *Litsea* Complex (Lauraceae): a cladistic Analysis on the Basis of morphological and Leaf Cuticle Data.**

In: *Australian Systematic Botany* 13, p. 1–13.

- LI, JIE; CHRISTOPHEL, DAVID C.; CONRAN, JOHN G.; LI, HSI-WEN (2004):  
**Phylogenetic Relationships within the "Core" Laureae (*Litsea* complex, Lauraceae) inferred from Sequences of the Chloroplast Gene matK and nuclear ribosomal DNA ITS Regions.**  
In: Plant Systematics and Evolution 246 (1-2), p. 19–34. DOI: 10.1007/s00606-003-0113-z.
- LI, JIE; CONRAN, JOHN G.; CHRISTOPHEL, DAVID C.; LI, ZHI-MING; LI, LANG; LI, HSI-WEN (2008):  
**Phylogenetic Relationships of the *Litsea* Complex and Core Laureae (Lauraceae) using ITS and ETS Sequences and Morphology.**  
In: Annals of the Missouri Botanical Garden 95 (4), p. 580–599. DOI: 10.3417/2006125.9504.
- LI, L.; LI, J.; CONRAN, JOHN G.; LI, X.-W.; LI, H.-W. (2007):  
**Phylogeny of *Neolitsea* (Lauraceae) inferred from Bayesian Analysis of nrDNA ITS and ETS Sequences.**  
In: Plant Systematics and Evolution 269 (3-4), p. 203–221. DOI: 10.1007/s00606-007-0580-8.
- LI, LANG; LI, JIE; ROHWER, JENS GUNTER; VAN DER WERFF, HENK; WANG, ZHI-HUA; LI, HSI-WEN (2011):  
**Molecular phylogenetic Analysis of the *Persea* Group (Lauraceae) and its biogeographic Implications on the Evolution of tropical and subtropical Amphipacific Disjunctions.**  
In: American Journal of Botany 98 (9), p. 1520–1536. DOI: 10.3732/ajb.1100006.
- LI, LANG; MADRIÑÁN, SANTIAGO; LI, JIE (2016):  
**Phylogeny and Biogeography of *Caryodaphnopsis* (Lauraceae) inferred from low-copy nuclear Gene and ITS Sequences.**  
In: Taxon 65 (3), p. 433–443. DOI: 10.12705/653.1.
- LI, ZHI-MING (2006):  
**Polyphyly of the Genus *Actinodaphne* (Lauraceae) inferred from the Analyses of nrDNA ITS and ETS Sequences.**  
In: Acta Phytotaxonomica Sinica 44 (3), p. 272. DOI: 10.1360/aps040150.
- NIE, Z.-L.; WEN, JUN; SUN, H. (2007):  
**Phylogeny and Biogeography of *Sassafras* (Lauraceae) disjunct between Eastern Asia and Eastern North America.**  
In: Plant Systematics and Evolution 267 (1-4), p. 191–203. DOI: 10.1007/s00606-007-0550-1.
- NISHIDA, SACHIKO; VAN DER WERFF, HENK (2011):  
**An Evaluation of Classification by cuticular Characters of the Lauraceae. A Comparison to molecular Phylogeny.**  
In: Annals of the Missouri Botanical Garden 98 (3), p. 348–357. DOI: 10.3417/2010054.
- NISHIDA, SACHIKO; VAN DER WERFF, HENK (2014):  
**Do Cuticle Characters support the Recognition of *Alseodaphne*, *Nothaphoebe* and *Dehaasia* as distinct Genera?**  
In: Reinwardtia 14 (1), p. 53–66.
- ROHWER, JENS GUNTER (2000):  
**Toward a phylogenetic Classification of the Lauraceae. Evidence from matK Sequences.**  
In: Systematic Botany 25 (1), p. 60. DOI: 10.2307/2666673.
- ROHWER, JENS GUNTER; LI, JIE; RUDOLPH, BARBARA; SCHMIDT, SABRINA A.; VAN DER WERFF, HENK; LI, HSI-WEN (2009):

**Is *Persea* (Lauraceae) monophyletic? Evidence from nuclear ribosomal ITS Sequence.**

In: *Taxon* 58 (4), p. 1153–1167.

**ROHWER, JENS GUNTER; MORAES, PEDRO LUIS RODRIGUES; RUDOLPH, BARBARA; VAN DER WERFF, HENK (2014):**

**A phylogenetic Analysis of the *Cryptocarya* Group (Lauraceae), and Relationships of *Dahlgrenodendron*, *Sinopora*, *Triadodaphne*, and *Yasunia*.**

In: *Phytotaxa* 158 (2), p. 111–132. DOI: 10.11646/phytotaxa.158.2.1.

**TROFIMOV, DIMITRIJ; RUDOLPH, BARBARA; ROHWER, JENS GUNTER (2016):**

**Phylogenetic Study of the Genus *Nectandra* (Lauraceae), and Reinstatement of *Damburneya*.**

In: *Taxon* 65 (5), p. 980–996. DOI: 10.12705/655.3.

**VAN DER MERWE, MARLIEN M.; CRAYN, DARREN M.; FORD, ANDREW J.; WESTON, PETER H.; ROSSETTO, MAURIZIO (2016):**

**Evolution of Australian *Cryptocarya* (Lauraceae) based on nuclear and Plastid phylogenetic Trees. Evidence of recent Landscape-level Disjunctions.**

In: *Australian Systematic Botany* 29 (2), p. 157–166. DOI: 10.1071/SB16023.

**WANG, ZHI-HUA; LI, JIE; CONRAN, JOHN G.; LI, HSI-WEN (2010):**

**Phylogeny of the Southeast Asian endemic Genus *Neocinnamomum* H.Liu (Lauraceae).**

In: *Plant Systematics and Evolution* 290 (1-4), p. 173–184. DOI: 10.1007/s00606-010-0359-1.

## **Lecythidaceae**

**BARRETT, RUSSELL L. (2006):**

**A Review of *Planchonia* (Lecythidaceae) in Australia.**

In: *Australian Systematic Botany* 19 (2), p. 147–153. DOI: 10.1071/SB05008.

**HUANG, YA-YI; MORI, SCOTT A.; KELLY, LAWRENCE M. (2011):**

**A morphological cladistic Analysis of Lecythidoideae with Emphasis on *Bertholletia*, *Corythophora*, *Eschweilera*, and *Lecythis*.**

In: *Brittonia* 63 (3), p. 396–417. DOI: 10.1007/s12228-011-9202-4.

**HUANG, YA-YI; MORI, SCOTT A.; KELLY, LAWRENCE M. (2015):**

**Toward a phylogenetic-based Generic Classification of Neotropical Lecythidaceae - I. Status of *Bertholletia*, *Corythophora*, *Eschweilera* and *Lecythis*.**

In: *Phytotaxa* 203 (2), p. 85. DOI: 10.11646/phytotaxa.203.2.1.

**HUANG, YA-YI; MORI, SCOTT A.; PRANCE, GHILLEAN T. (2008):**

**A Phylogeny of *Cariniana* (Lecythidaceae) based on morphological and anatomical Data.**

In: *Brittonia* 60 (1), p. 69–81. DOI: 10.1007/s12228-008-9014-3.

**MORI, SCOTT A.; SMITH, NATHAN P.; HUANG, YA-YI; PRANCE, GHILLEAN T.; KELLY, LAWRENCE M.; MATOS, CAROL CAROLLO (2015):**

**Toward a Phylogenetic-based Generic Classification of Neotropical Lecythidaceae - II. Status of *Allantoma*, *Cariniana*, *Couratari*, *Couroupita*, *Grias* and *Gustavia*.**

In: *Phytotaxa* 203 (2), p. 122. DOI: 10.11646/phytotaxa.203.2.2.

**MORI, SCOTT A.; TSOU, CHI-HUA; WU, CHI-CHIH; CRONHOLM, BODIL; ANDERBERG, ARNE A. (2007):**

**Evolution of Lecythidaceae with an Emphasis on the Circumscription of Neotropical Genera: information from combined *ndhF* and *trnL-F* Sequence Data.**

In: *American Journal of Botany* 94 (3), p. 289–301. DOI: 10.3732/ajb.94.3.289.



PRANCE, GHILLEAN T.; JONGKIND, CAREL C. H. (2015):

**A Revision of African Lecythidaceae.**

In: Kew Bulletin 70 (6). DOI: 10.1007/S12225-014-9547-4.

## Lentibulariaceae

CIESLAK, THOMAS; POLEPALLI, JAI SANTOSH; WHITE, ADAM; MÜLLER, KAI F.; BORSCH, THOMAS; BARTHLOTT, WILHELM ET AL. (2005):

**Phylogenetic Analysis of *Pinguicula* (Lentibulariaceae): Chloroplast DNA Sequences and Morphology support several geographically distinct Adiations.**

In: American Journal of Botany 92 (10), p. 1723–1736.

DEGTJAREVA, GALINA V.; CASPER, P. J.; HELLWIG, FRANK H.; SCHMIDT, A. R.; STEIGER, JÜRGEN; SOKOLOFF, DMITRY D. (2006):

**Morphology and nrITS Phylogeny of the Genus *Pinguicula* L. (Lentibulariaceae), with special attention to Embryo Evolution.**

In: Plant Biology 8 (6), p. 778–790. DOI: 10.1055/s-2006-924560.

FLEISCHMANN, ANDREAS; SCHÄFERHOFF, BASTIAN; HEUBL, GÜNTHER; RIVADAVIA, FERNANDO; BARTHLOTT, WILHELM; MÜLLER, KAI F. (2010):

**Phylogenetics and Character Evolution in the carnivorous Plant Genus *Genlisea* A.St.-Hil. (Lentibulariaceae).**

In: Molecular Phylogenetics and Evolution 56 (2), p. 768–783. DOI: 10.1016/j.ympev.2010.03.009.

KONDO, KATSUHIKO; SHIMAI, HIRO (2006):

**Phylogenetic based Analysis of the Northern *Pinguicula* (Lentibulariaceae) on Internal Transcribed Spacer (ITS) Sequence.**

In: Acta Phytotaxonomica Geobotanica 57 (2), p. 155–164.

MÜLLER, KAI F.; BORSCH, THOMAS (2005):

**Phylogenetics of *Utricularia* (Lentibulariaceae) and molecular Evolution of the trnK Intron in a Lineage with high substitutional Rates.**

In: Plant Systematics and Evolution 250 (1-2), p. 39–67. DOI: 10.1007/s00606-004-0224-1.

MÜLLER, KAI F.; BORSCH, THOMAS; LEGENDRE, L.; POREMBSKI, STEFAN; BARTHLOTT, WILHELM (2006):

**Recent progress in Understanding the Evolution of carnivorous Lentibulariaceae (Lamiales).**

In: Plant Biology 8 (6), p. 748–757. DOI: 10.1055/s-2006-924706.

REUT, MARKUS S.; JOBSON, RICHARD W. (2010):

**A phylogenetic Study of Subgenus *Polypompholyx*: a parallel Radiation of *Utricularia* (Lentibulariaceae) throughout Australasia.**

In: Australian Systematic Botany 23 (3), p. 152–161. DOI: 10.1071/SB09054.

SILVA, SAURA R.; GIBSON, ROBERT; ADAMEC, LUBOMÍR; DOMÍNGUEZ, YOANNIS; MIRANDA, VITOR F. O. (2018):

**Molecular Phylogeny of Bladderworts: A wide approach of *Utricularia* (Lentibulariaceae) Species Relationships based on six plastidial and nuclear DNA Sequences.**

In: Molecular Phylogenetics and Evolution 118, p. 244–264. DOI: 10.1016/j.ympev.2017.10.010.

## Liliaceae

BARTHA, LÁSZLÓ; STEPANOV, NIKOLAY V.; RUKŠĀNS, JĀNIS; BANCUI, HORIA L.; KERESZTES, LUJZA (2015):

**Non-Monophyly of Siberian *Erythronium* (Liliaceae) leads to the Recognition of the formerly neglected *Erythronium sajanense*.**

In: Journal of Plant Research 128 (5), p. 721–729. DOI: 10.1007/s10265-015-0734-7.

- BOOY, G.; VAN DER SCHOOT, J.; VOSMAN, BEN (2000):**  
**Heterogeneity of the Internal Transcribed Spacer 1 (ITS1) in *Tulipa* (Liliaceae).**  
 In: *Plant Systematics and Evolution* 225 (1-4), p. 29–41. DOI: 10.1007/BF00985457.
- CHRISTENHUSZ, MAARTEN J.M.; GOVAERTS, RAFAEL; DAVID, JOHN C.; HALL, TONY; BORLAND, KATHERINE; ROBERTS, PENELOPE P. ET AL. (2013):**  
**Tiptoe through the Tulips - cultural History, molecular Phylogenetics and Classification of *Tulipa* (Liliaceae).**  
 In: *Botanical Journal of the Linnean Society* 172 (3), p. 280–328. DOI: 10.1111/boj.12061.
- CLENNETT, JOHN C. B.; CHASE, MARK W.; FOREST, FÉLIX; MAURIN, OLIVIER; WILKIN, PAUL (2012):**  
**Phylogenetic Systematics of *Erythronium* (Liliaceae): morphological and molecular Analyses.**  
 In: *Botanical Journal of the Linnean Society* 170 (4), p. 504–528. DOI: 10.1111/j.1095-8339.2012.01302.x.
- DAY, PETER D.; BERGER, MADELEINE; HILL, LAURENCE; FAY, MICHAEL F.; LEITCH, ANDREW R.; LEITCH, ILIA J.; KELLY, LAURA J. (2014):**  
**Evolutionary Relationships in the medicinally important Genus *Fritillaria* L. (Liliaceae).**  
 In: *Molecular Phylogenetics and Evolution* 80, p. 11–19. DOI: 10.1016/j.ympev.2014.07.024.
- EKER, İSMAİL; BABAÇ, MEHMET TEKİN; KOYUNCU, MEHMET (2014):**  
**Revision of the Genus *Tulipa* L. (Liliaceae) in Turkey.**  
 In: *Phytotaxa* 157 (1), p. 1. DOI: 10.11646/phytotaxa.157.1.1.
- GAO, YUN-DONG; HARRIS, A. J.; HE, XING-JIN (2015):**  
**Morphological and ecological Divergence of *Lilium* and *Nomocharis* within the Hengduan Mountains and Qinghai-Tibetan Plateau may result from Habitat Specialization and Hybridization.**  
 In: *BMC Evolutionary Biology* 15, p. 147. DOI: 10.1186/s12862-015-0405-2.
- GAO, YUN-DONG; HARRIS, A. J.; ZHOU, SONG-DONG; HE, XING-JIN (2013):**  
**Evolutionary events in *Lilium* (including *Nomocharis*, Liliaceae) are temporally correlated with Orogenies of the Q-T Plateau and the Hengduan Mountains.**  
 In: *Molecular Phylogenetics and Evolution* 68 (3), p. 443–460. DOI: 10.1016/j.ympev.2013.04.026.
- HAYASHI, KAZUHIKO; KAWANO, SHOICHI (2000):**  
**Molecular Systematics of *Lilium* and allied Genera (Liliaceae): phylogenetic Relationships among *Lilium* and related Genera based on the rbcL and matK Gene Sequence Data.**  
 In: *Plant Species Biology* 15 (1), p. 73–93. DOI: 10.1046/j.1442-1984.2000.00025-2.x.
- HAYASHI, KAZUHIKO; YOSHIDA, SEIJI; UTECH, FREDERICK H.; KAWANO, SHOICHI (2001):**  
**Molecular Systematics in the Genus *Clintonia* and related Taxa based on rbcL and matK Gene Sequence Data.**  
 In: *Plant Species Biology* 16 (2), p. 119–137. DOI: 10.1046/j.1442-1984.2001.00057.x.
- IKINCI, NURSEL; OBERPRIELER, CHRISTOPH (2010):**  
**Genetic Relationships among NE-Turkish *Lilium* L. (Liliaceae) Species based on a random amplified polymorphic DNA Analysis.**  
 In: *Plant Systematics and Evolution* 284 (1-2), p. 41–48. DOI: 10.1007/s00606-009-0239-8.
- KHOURANG, MAHMOUD; BABAEI, ALIREZA; SEFIDKON, FATEMEH; NAGHAVI, MOHAMMAD REZA; ASGARI, DAVOOD; POTTER, DANIEL (2014):**

**Phylogenetic Relationship in *Fritillaria* spp. of Iran inferred from ribosomal ITS and Chloroplast trnL-trnF Sequence Data.**

In: *Biochemical Systematics and Ecology* 57, p. 451–457. DOI: 10.1016/j.bse.2014.10.001.

**KIANI, MAHNAZ; MEMARIANI, FARSHID; ZARGHAMI, HOMA (2012):**

**Molecular Analysis of Species of *Tulipa* L. from Iran based on ISSR Markers.**

In: *Plant Systematics and Evolution* 298 (8), p. 1515–1522. DOI: 10.1007/s00606-012-0654-0.

**MUCCIARELLI, MARCO; FAY, MICHAEL F. (2013):**

**Plastid DNA fingerprinting of the rare *Fritillaria moggridgei* (Liliaceae) reveals Population Differentiation and genetic Isolation within the *Fritillaria tubiformis* complex.**

In: *Phytotaxa* 91 (1), p. 1. DOI: 10.11646/phytotaxa.91.1.1.

**MURATOVIĆ, EDINA; ROBIN, ODIL; BOGUNIĆ, FARUK; ŠOLJAN, DUBRAVKA; SILJAK-YAKOVLEV, SONJA (2010):**

**Karyotype Evolution and Speciation of European Lilies from *Lilium* Sect. *Liriotypus*.**

In: *Taxon* 59 (1), p. 165–175. DOI: 10.1002/tax.591016.

**NISHIKAWA, TOMOTARO; OKAZAKI, KEIICHI; UCHINO, TAE; ARAKAWA, KATSURO; NAGAMINE, TSUKASA (1999):**

**A molecular Phylogeny of *Lilium* in the Internal Transcribed Spacer Region of Nuclear Ribosomal DNA.**

In: *Molecular Phylogenetics and Evolution* 49 (49), p. 238–249.

**PERUZZI, LORENZO; PETERSON, ANGELA; TISON, JEAN-MARC; HARPKE, DÖRTE (2011):**

**New light on Phylogeny and Taxonomy of the Eurasian *Gagea villosa*-*G. fragifera* Complex (Liliaceae).**

In: *Nordic Journal of Botany* 29 (6), p. 722–733. DOI: 10.1111/j.1756-1051.2011.01187.x.

**PERUZZI, LORENZO; PETERSON, ANGELA; TISON, JEAN-MARC; PETERSON, JENS (2008):**

**Phylogenetic Relationships of *Gagea* Salisb. (Liliaceae) in Italy, inferred from molecular and morphological Data matrices.**

In: *Plant Systematics and Evolution* 276 (3-4), p. 219–234. DOI: 10.1007/s00606-008-0081-4.

**PERUZZI, LORENZO; TISON, JEAN-MARC; PETERSON, ANGELA; PETERSON, JENS (2008):**

**On the phylogenetic Position and taxonomic value of *Gagea trinervia* (Viv.) Greuter and *Gagea* Sect. *Anthericoides* A.Terracc. (Liliaceae).**

In: *Taxon* 57 (4), p. 1201–1214. DOI: 10.1002/tax.574013.

**PETERSON, ANGELA; HARPKE, DÖRTE; LEVICHEV, IGOR G.; BEISENOVA, SALTANAT; SCHNITTLER, MARTIN; PETERSON, JENS (2016):**

**Morphological and molecular Investigations of *Gagea* (Liliaceae) in Southeastern Kazakhstan with special Reference to putative altitudinal Hybrid Zones.**

In: *Plant Systematics and Evolution* 302 (8), p. 985–1007. DOI: 10.1007/s00606-016-1313-7.

**PETERSON, ANGELA; JOHN, H.; KOCH, E.; PETERSON, JENS (2004):**

**A molecular Phylogeny of the Genus *Gagea* (Liliaceae) in Germany inferred from non-coding Chloroplast and nuclear DNA Sequences.**

In: *Plant Systematics and Evolution* 245 (3-4), p. 145–162. DOI: 10.1007/s00606-003-0114-y.

**PETERSON, ANGELA; LEVICHEV, IGOR G.; PETERSON, JENS (2008):**

**Systematics of *Gagea* and *Lloydia* (Liliaceae) and infrageneric Classification of *Gagea* based on molecular and morphological Data.**

In: *Molecular Phylogenetics and Evolution* 46 (2), p. 446–465. DOI: 10.1016/j.ympev.2007.11.016.

**PETERSON, ANGELA; LEVICHEV, IGOR G.; PETERSON, JENS; HARPKE, DÖRTE; SCHNITTLER, MARTIN (2011):**

**New Insights into the Phylogeny and Taxonomy of Chinese Species of *Gagea* (Liliaceae) - Speciation through Hybridization.**

In: *Organisms Diversity and Evolution* 11 (5), p. 387–407. DOI: 10.1007/s13127-011-0059-x.

REŠETNIK, I.; LIBER, ZLATKO; SATOVIĆ, ZLATKO; CIGIĆ, P.; NIKOLIĆ, TONI (2007):

**Molecular Phylogeny and Systematics of the *Lilium carnolicum* Group (Liliaceae) based on nuclear ITS Sequences.**

In: *Plant Systematics and Evolution* 265 (1-2), p. 45–58. DOI: 10.1007/s00606-006-0513-y.

RØNSTED, NINA; LAW, STEVE; THORNTON, HANNAH; FAY, MICHAEL F.; CHASE, MARK W. (2005):

**Molecular phylogenetic Evidence for the Monophyly of *Fritillaria* and *Lilium* (Liliaceae; Liliales) and the infrageneric Classification of *Fritillaria*.**

In: *Molecular Phylogenetics and Evolution* 35 (3), p. 509–527. DOI: 10.1016/j.ympev.2004.12.023.

TAN, DUN-YAN; LI, XIN-RONG; HONG, DE-YUAN (2007):

***Amana kuocangshanica* (Liliaceae), a new Species from South-east China.**

In: *Botanical Journal of the Linnean Society* 154 (3), p. 435–442. DOI: 10.1111/j.1095-8339.2007.00660.x.

TEKŞEN, MEHTAP; KARAMAN ERKUL, SEHER (2015):

**The Synopsis of the Genus *Gagea* (Liliaceae) in Turkey.**

In: *Phytotaxa* 230 (2), p. 101. DOI: 10.11646/phytotaxa.230.2.1.

TURKTAS, MINE; METIN, ÖZGE KARAKAŞ; BAŞTUĞ, BERK; ERTUĞRUL, FAHRIYE; SARAÇ, YASEMIN IZGI; KAYA, ERDAL (2013):

**Molecular phylogenetic Analysis of *Tulipa* (Liliaceae) based on noncoding Plastid and nuclear DNA Sequences with an Emphasis on Turkey.**

In: *Botanical Journal of the Linnean Society* 172 (3), p. 270–279. DOI: 10.1111/boj.12040.

WIETSMA, WILLEM A.; DEINUM, DANIEL; TEUNISSEN, HEDWICH A. S.; VAN DEN BERG, RONALD G. (2015):

**Phylogenetic Relationships within *Fritillaria* Section *Petilium* based on AFLP fingerprints.**

In: *Plant Systematics and Evolution* 301 (3), p. 1043–1054. DOI: 10.1007/s00606-014-1135-4.

ZARREI, MEHDI; WILKIN, PAUL; FAY, MICHAEL F.; INGROUILLE, MARTIN J.; ZARRE, SHAHIN; CHASE, MARK W. (2009):

**Molecular Systematics of *Gagea* and *Lloydia* (Liliaceae; Liliales): Implications of Analyses of nuclear ribosomal and Plastid DNA Sequences for infrageneric Classification.**

In: *Annals of Botany* 104 (1), p. 125–142. DOI: 10.1093/aob/mcp103.

ZHAO, LIHUA; LIU, HUAMIN; CAI, GUANGZE; XIA, MINGZHONG (2014):

**Assessment of the genetic Diversity and genetic Relationships of *Lilium* in China using ISSR Markers.**

In: *Biochemical Systematics and Ecology* 55, p. 184–189. DOI: 10.1016/j.bse.2014.03.024.

ZONNEVELD, BEN J. M. (2009):

**The systematic value of nuclear Genome size for “all” Species of *Tulipa* L. (Liliaceae).**

In: *Plant Systematics and Evolution* 281 (1-4), p. 217–245. DOI: 10.1007/s00606-009-0203-7.

## Liliales

GIVNISH, THOMAS J.; ZULUAGA, ALEJANDRO; MARQUES, ISABEL; LAM, VIVIENNE K. Y.; GOMEZ, MARYBEL SOTO; ILES, WILLIAM J. D. ET AL. (2016):

**Phylogenomics and historical Biogeography of the Monocot Order Liliales: out of Australia and through Antarctica.**

In: *Cladistics* 32 (6), p. 581–605. DOI: 10.1111/cla.12153.

**KIM, JUNG SUNG; HONG, JEONG-KI; CHASE, MARK W.; FAY, MICHAEL F.; KIM, JOO-HWAN (2013):  
Familial Relationships of the Monocot Order Liliales based on a molecular  
phylogenetic Analysis using four Plastid Loci: MatK, rbcL, atpB and atpF.**  
In: *Botanical Journal of the Linnean Society* 172 (1), p. 5–21. DOI: 10.1111/boj.12039.

**PATTERSON, THOMAS B.; GIVNISH, THOMAS J. (2002):  
Phylogeny, concerted Convergence, and phylogenetic Niche Conservatism in the  
Core Liliales: Insights from rbcL and ndhF Sequence Data.**  
In: *Evolution* 56 (2), p. 233–252. DOI: 10.1554/0014-3820(2002)056[0233:PCCAPN]2.0.CO;2.

**PETERSEN, GITTE; SEBERG, OLE; DAVIS, JERROLD I. (2013):  
Phylogeny of the Liliales (Monocotyledons) with special Emphasis on Data Partition  
congruence and RNA editing.**  
In: *Cladistics* 29 (3), p. 274–295. DOI: 10.1111/j.1096-0031.2012.00427.x.

## Limnanthaceae

**MEYERS, STEPHEN C.; LISTON, AARON; MEINKE, ROBERT (2010):  
A molecular Phylogeny of *Limnanthes* (Limnanthaceae) and Investigation of an  
anomalous *Limnanthes* Population from California, U.S.A.**  
In: *Systematic Botany* 35 (3), p. 552–558. DOI: 10.1600/036364410792495854.

## Linaceae

**MCDILL, JOSHUA R.; REPLINGER, MIRIAM; SIMPSON, BERYL B.; KADEREIT, JOACHIM W. (2009):  
The Phylogeny of *Linum* and Linaceae Subfamily Linoideae, with Implications for  
their Systematics, Biogeography, and Evolution of Heterostyly.**  
In: *Systematic Botany* 34 (2), p. 386–405. DOI: 10.1600/036364409788606244.

**MCDILL, JOSHUA R.; SIMPSON, BERYL B. (2011):  
Molecular Phylogenetics of Linaceae with complete generic Sampling and Data from  
two Plastid Genes.**  
In: *Botanical Journal of the Linnean Society* 165, p. 64–83.

**SVEINSSON, SAEMUNDUR; MCDILL, JOSHUA R.; WONG, GANE KA-SHU; LI, JUANJUAN; LI, XIA; DEYHOLOS, MICHAEL K.;  
CRONK, QUENTIN C.B. (2014):  
Phylogenetic pinpointing of a Paleopolyploidy event within the flax Genus (*Linum*)  
using Transcriptomics.**  
In: *Annals of Botany* 113 (5), p. 753–761. DOI: 10.1093/aob/mct306.

## Linderniaceae

**FISCHER, EBERHARD; SCHÄFERHOFF, BASTIAN; MÜLLER, KAI F. (2013):  
The Phylogeny of Linderniaceae — the new Genus *Linderniella*, and new  
Combinations within *Bonnaya*, *Craterostigma*, *Lindernia*, *Micranthemum*, *Torenia*  
and *Vandellia*.**  
In: *Willdenowia* 43 (2), p. 209–238. DOI: 10.3372/wi.43.43201.

**LIANG, YI-SHUO; WANG, JENN-CHE (2014):  
A systematic Study of *Bonnaya* Section *Bonnaya* (Linderniaceae).**  
In: *Australian Systematic Botany* 27 (3), p. 180–198. DOI: 10.1071/SB14002.

**LIANG, YI-SHUO; WANG, JENN-CHE (2016):  
New Combinations in *Craterostigma* and *Torenia* (Linderniaceae) from Asia with key  
to allied Species.**  
In: *Phytotaxa* 247 (2), p. 148. DOI: 10.11646/phytotaxa.247.2.8.

MENDONÇA DE ALMEIDA, ERTON; WANDERLEY, ARTUR MAIA; NOLLET, FELIPE; COSTA, FABIANE R.; SOUZA, LUIZ GUSTAVO R.; FELIX, LEONARDO P. (2016):

**A new Species of *Ameroglossum* (Scrophulariaceae) Growing on Inselbergs in Northeastern Brazil.**

In: Systematic Botany 41 (2), p. 423–429. DOI: 10.1600/036364416X691740.

RAHMANZADEH, R.; MÜLLER, KAI F.; FISCHER, EBERHARD; BARTELS, D.; BORSCH, THOMAS (2005):

**The Linderniaceae and Gratiolaceae are further Lineages distinct from the Scrophulariaceae (Lamiales).**

In: Plant Biology 7 (1), p. 67–78. DOI: 10.1055/s-2004-830444.

SCHÄFERHOFF, BASTIAN; FLEISCHMANN, ANDREAS; FISCHER, EBERHARD; ALBACH, DIRK C.; BORSCH, THOMAS; HEUBL, GÜNTHER; MÜLLER, KAI F. (2010):

**Towards resolving Lamiales Relationships: Insights from rapidly evolving Chloroplast Sequences.**

In: BMC Evolutionary Biology 10, p. 352. DOI: 10.1186/1471-2148-10-352.

## Lindsaeaceae

LEHTONEN, SAMULI; TUOMISTO, HANNA; ROUHAN, GERMING; CHRISTENHUSZ, MAARTEN J.M. (2010):

**Phylogenetics and Classification of the pantropical Fern Family Lindsaeaceae.**

In: Botanical Journal of the Linnean Society 163, p. 305–359.

PERRIE, LEON R.; SHEPHERD, LARA D.; THOUVENOT, L.; KONRAT, M. (2014):

**Chloroplast DNA Sequences support the Transfer of the New Caledonian endemic Fern *Sphenomeris alutacea* to *Odontosoria*.**

In: New Zealand Journal of Botany 52 (3), p. 310–314. DOI: 10.1080/0028825X.2014.907816.

## Linnaeaceae

JACOBS, BART; PYCK, NANCY; SMETS, ERIK (2010):

**Phylogeny of the *Linnaea* Clade: are *Abelia* and *Zabelia* closely related?**

In: Molecular Phylogenetics and Evolution 57 (2), p. 741–752. DOI: 10.1016/j.ympev.2010.08.007.

## Loasaceae

BROKAW, JOSHUA M.; HUFFORD, LARRY (2010):

**Origins and introgression of polyploid Species in *Mentzelia* Section *Trachyphytum* (Loasaceae).**

In: American Journal of Botany 97 (9), p. 1457–1473. DOI: 10.3732/ajb.0900388.

HUFFORD, LARRY; McMAHON, MICHELLE M.; O'QUINN, ROBIN L.; POSTON, MURIEL E. (2005):

**A phylogenetic Analysis of Loasaceae Subfamily Loasoideae based on Plastid DNA Sequences.**

In: International Journal of Plant Sciences (166), p. 289–300.

HUFFORD, LARRY; McMAHON, MICHELLE M.; SHERWOOD, ANNA M.; REEVES, GAIL; CHASE, MARK W. (2003):

**The major Clades of Loasaceae: phylogenetic Analysis using the Plastid matK and trnL-trnF Regions.**

In: American Journal of Botany 90 (8), p. 1215–1228. DOI: 10.3732/ajb.90.8.1215.

MOODY, MICHAEL L.; HUFFORD, LARRY; SOLTIS, DOUGLAS E.; SOLTIS, PAMELA P. (2001):

**Phylogenetic Relationships of Loasaceae Subfamily Gronovioideae inferred from matK and ITS Sequence Data.**

In: American Journal of Botany 88 (2), p. 326–336. DOI: 10.2307/2657022.

SCHENK, JOHN J.; HUFFORD, LARRY (2011):

**Phylogeny and Taxonomy of *Mentzelia* Section *Bartonia* (Loasaceae).**

In: Systematic Botany 36 (3), p. 711–720. DOI: 10.1600/036364411X583673.

**STRELIN, MARINA MICAELA; ARROYO, JOSÉ IGNACIO; FLIESSWASSER, STELLA; ACKERMANN, MARKUS (2017):  
Diversification of *Caiophora* (Loasaceae Subfam. Loasoideae) during the Uplift of the  
Central Andes.**

In: Organisms Diversity and Evolution 17 (1), p. 29–41. DOI: 10.1007/s13127-016-0312-4.

**WEIGEND, MAXIMILIAN (2006):**

**Validating Subfamily, Genus and Species Names in Loasaceae (Cornales).**

In: Taxon 55 (2), p. 463–468.

**WEIGEND, MAXIMILIAN (2007):**

**Systematics of the Genus *Mentzelia* (Loasaceae) in South America.**

In: Annals of the Missouri Botanical Garden 94 (3), p. 655–689. DOI: 10.3417/0026-6493(2007)94[655:SOTGML]2.0.CO;2.

## Loganiaceae

**BACKLUND, MARIA; OXELMAN, BENGT; BREMER, BIRGITTA (2000):**

**Phylogenetic Relationships within the Gentianales based on Ndhf and RbcL  
Sequences, with particular Reference to the Loganiaceae.**

In: American Journal of Botany 87 (7), p. 1029–1043.

**FOSTER, CHARLES S.P.; CONN, BARRY J.; HENWOOD, MURRAY J.; HO, SIMON Y.W. (2014):**

**Molecular Data support *Orianthera*: a new Genus of Australian Loganiaceae.**

In: Telopea 16, p. 149–158.

**FOSTER, CHARLES S.P.; HO, SIMON Y.W.; CONN, BARRY J.; HENWOOD, MURRAY J. (2014):**

**Molecular Systematics and Biogeography of *Logania* R.Br. (Loganiaceae).**

In: Molecular Phylogenetics and Evolution 78, p. 324–333. DOI: 10.1016/j.ympev.2014.06.001.

**GIBBONS, KERRY L.; HENWOOD, MURRAY J.; CONN, BARRY J. (2012):**

**Phylogenetic Relationships in Loganieae (Loganiaceae) inferred from nuclear  
ribosomal and Chloroplast DNA Sequence Data.**

In: Australian Systematic Botany 25 (5), p. 331–340. DOI: 10.1071/SB12002.

**GRANT, JASON R. (2009):**

**A Revision of Neotropical *Bonyunia* (Loganiaceae: Antonieae).**

In: Annals of the Missouri Botanical Garden 96 (4), p. 541–563. DOI: 10.3417/2006135.

## Lomariopsidaceae

**CHRISTENHUSZ, MAARTEN J.M.; JONES, MIRKKA; LEHTONEN, SAMULI (2013):**

**Phylogenetic Placement of the enigmatic Fern Genus *Dracoglossum*.**

In: American Fern Journal 103 (2), p. 131–138. DOI: 10.1640/0002-8444-103.2.131.

**HENNEQUIN, SABINE; HOVENKAMP, PETER H.; CHRISTENHUSZ, MAARTEN J.M.; SCHNEIDER, HARALD (2010):**

**Phylogenetics and Biogeography of *Nephrolepis* – a tale of old Settlers and young  
Tramps.**

In: Botanical Journal of the Linnean Society 164, p. 113–127.

## Loranthaceae

**AMICO, GUILLERMO C.; VIDAL-RUSSELL, ROMINA (2007):**

**Phylogenetic Relationships and ecological Speciation in the Mistletoe *Tristerix*  
(Loranthaceae): the Influence of Pollinators, Dispersers, and Hosts.**

In: American Journal of Botany 94 (4), p. 558–567.

CAIRES, CLAUDENIR SIMÕES; AZEVEDO, CECÍLIA OLIVEIRA DE (2015):

***Peristethium phaneroneurum* (Loranthaceae): a new Combination expands the Distribution of the Genus from Honduras to Brazil.**

In: *Rodriguésia* 66 (3), p. 859–861. DOI: 10.1590/2175-7860201566313.

KIM, CHAN-SOO; KIM, SOO-YOUNG; SUN, BYUNG-YUN; YI, JAE SEON (2013):

**A Review of the taxonomic and ecological characteristics of Korean mistletoe types (*Viscum*, *Korthalsella*, *Loranthus* and *Taxillus*).**

In: *Korean Journal of Plant Taxonomy* 43 (2), p. 81–89. DOI: 10.11110/kjpt.2013.43.2.81.

KUIJT, JOB (2012):

**Reinstatement and Expansion of the Genus *Peristethium* (Loranthaceae).**

In: *Annals of the Missouri Botanical Garden* 98 (4), p. 542–577. DOI: 10.3417/2010121.

KUIJT, JOB (2014):

**A Monograph of the Genus *Aetanthus* (Loranthaceae).**

In: *Plant Diversity and Evolution* 131 (1), p. 1–51. DOI: 10.1127/1869-6155/2014/0131-0063.

LIU, BING; LE, CHI-TOAN; BARRETT, RUSSELL L.; NICKRENT, DANIEL LEE; CHEN, ZHI-DUAN; LU, LIMIN; VIDAL-RUSSELL, ROMINA (2018):

**Historical Biogeography of Loranthaceae (Santalales): Diversification agrees with Emergence of tropical Forests and Radiation of Songbirds.**

In: *Molecular Phylogenetics and Evolution* 124, p. 199–212. DOI: 10.1016/j.ympev.2018.03.010.

VIDAL-RUSSELL, ROMINA; NICKRENT, DANIEL LEE (2007):

**A molecular Phylogeny of the Feathery Mistletoe *Misodendrum*.**

In: *Systematic Botany* 32 (3), p. 560–568.

VIDAL-RUSSELL, ROMINA; NICKRENT, DANIEL LEE (2008):

**Evolutionary Relationships in the showy Mistletoe Family (Loranthaceae).**

In: *American Journal of Botany* 95 (8), p. 1015–1029. DOI: 10.3732/ajb.0800085.

WILSON, CAROL A. (2006):

**An Origin of Aerial Branch Parasitism in the Mistletoe Family, Loranthaceae.**

In: *American Journal of Botany* 93 (5), p. 787–796.

## Lowiaceae

JOHANSEN, LOUISE B. (2005):

**Phylogeny of *Orchidantha* (Lowiaceae) and the Zingiberales based on six DNA Regions.**

In: *Systematic Botany* 30 (1), p. 106–117.

## Lycopodiaceae

AAGAARD, SUNNIVA M.D.; GREILHUBER, JOHANN; ZHANG, XIAN-CHUN; WIKSTRÖM, NIKLAS (2009):

**Occurrence and evolutionary Origins of polyploids in the clubmoss Genus *Diphasiastrum* (Lycopodiaceae).**

In: *Molecular Phylogenetics and Evolution* 52 (3), p. 746–754. DOI: 10.1016/j.ympev.2009.05.004.

AAGAARD, SUNNIVA M.D.; VOGEL, JOHANNES C.; WIKSTRÖM, NIKLAS (2009):

**Resolving maternal Relationships in the Clubmoss Genus *Diphasiastrum* (Lycopodiaceae).**

In: *Taxon* 58 (3), p. 835–848.

FIELD, ASHLEY R.; TESTO, WESTON; BOSTOCK, PETER D.; HOLTUM, JOSEPH A. M.; WAYCOTT, MICHELLE (2016):



**Molecular Phylogenetics and the Morphology of the Lycopodiaceae Subfamily Huperzioidae supports three Genera: *Huperzia*, *Phlegmariurus* and *Phylloglossum*.**

In: *Molecular Phylogenetics and Evolution* 94 (Pt B), p. 635–657. DOI: 10.1016/j.ympev.2015.09.024.

JI, SHENG-GUO; HUO, KE-KE; WANG, JUN; PAN, SHENG-LI (2008):

**A molecular phylogenetic Study of Huperziaceae based on Chloroplast *rbcl* and *psbA-trnH* Sequences.**

In: *Journal of Systematics and Evolution* 46 (2), p. 213–219.

ØLLGAARD, BENJAMIN (2012):

**Nomenclatural Changes in Brazilian Lycopodiaceae.**

In: *Rodriguésia* 63 (2), p. 479–482.

ØLLGAARD, BENJAMIN; WINDISCH, PAULO G. (2014):

**Lycopodiaceae in Brazil. Conspectus of the Family. I. the Genera *Lycopodium*, *Austrolycopodium*, *Diphasium*, and *Diphasiastrum*.**

In: *Rodriguésia* 65 (2), p. 293–309.

WIKSTRÖM, NIKLAS; KENRICK, PAUL (2001):

**Evolution of Lycopodiaceae (Lycopsidea): estimating Divergence times from *rbcl* Gene Sequences by use of nonparametric Rate Smoothing.**

In: *Molecular Phylogenetics and Evolution* 19 (2), p. 177–186. DOI: 10.1006/mpev.2001.0936.

## Lygodiaceae

MADEIRA, PAUL T.; PEMBERTON, ROBERT W.; CENTER, TED D. (2008):

**A molecular Phylogeny of the Genus *Lygodium* (Schizaeaceae) with special Reference to the biological Control and Host Range Testing of *Lygodium microphyllum*.**

In: *Biological Control* 45 (3), p. 308–318. DOI: 10.1016/j.biocontrol.2008.02.004.

## Lythraceae

BARBER, JANET C.; GHEBRETINSAE, AMANUEL G.; GRAHAM, SHIRLEY A. (2010):

**An expanded Phylogeny of *Cuphea* (Lythraceae) and a North American Monophyly.**

In: *Plant Systematics and Evolution* 289 (1-2), p. 35–44. DOI: 10.1007/s00606-010-0329-7.

GRAHAM, SHIRLEY A. (2010):

**Revision of the Caribbean Genus *Ginoria* (Lythraceae), including *Haitia* from Hispaniola.**

In: *Annals of the Missouri Botanical Garden* 97 (1), p. 34–90. DOI: 10.3417/2007028.

GRAHAM, SHIRLEY A.; DIAZGRANADOS, MAURICIO; BARBER, JANET C. (2011):

**Relationships among the confounding Genera *Ammannia*, *Hionanthera*, *Nesaea* and *Rotala* (Lythraceae).**

In: *Botanical Journal of the Linnean Society* 166 (1), p. 1–19. DOI: 10.1111/j.1095-8339.2011.01126.x.

GRAHAM, SHIRLEY A.; FREUDENSTEIN, JOHN V.; LUKER, MELISSA (2006):

**A phylogenetic Study of *Cuphea* (Lythraceae) based on Morphology and Nuclear rDNA ITS Sequences.**

In: *Systematic Botany* 31 (4), p. 764–778.

GRAHAM, SHIRLEY A.; HALL, JOCELYN C.; SYTSMA, KENNETH J.; SHI, SU-HUA (2005):

**Phylogenetic Analysis of the Lythraceae based on four Gene Regions and Morphology.**

In: *International Journal of Plant Sciences* 166 (6), p. 996–1017.

HUANG, YE-LIN; SHI, SU-HUA (2002):

**Phylogenetics of Lythraceae sensu lato: A Preliminary Analysis based on Chloroplast rbcL Gene, psaA-ycf3 Spacer, and Nuclear rDNA Internal Transcribed Spacer (ITS) Sequences.**

In: International Journal of Plant Sciences 163 (2), p. 215–225.

**YANG, YU-CHEN; YANG, SHU-HUAN; FANG, LU; LI, JIAN-FANG; ZHONG, CAI-RONG; ZHOU, REN-CHAO; SHI, SU-HUA (2015):**

**Phylogenetic Position of *Sonneratia griffithii* based on Sequences of the nuclear ribosomal Internal Transcribed Spacer and 13 nuclear Genes.**

In: Journal of Systematics and Evolution 53 (1), p. 47–52. DOI: 10.1111/jse.12102.

## Maesaceae

**ANDERBERG, ARNE A.; STÄHL, BERTIL; KÄLLERSJÖ, MARI (2000):**

**Maesaceae, a new Primuloid Family in the Order Ericales s.l.**

In: Taxon 49 (2), p. 183–187.

**MA, O. P. W.; SAUNDERS, RICHARD M.K. (2003):**

**Comparative Floral ontogeny of *Maesa* (Maesaceae), *Aegiceras* (Myrsinaceae) and *Embelia* (Myrsinaceae): taxonomic and phylogenetic Implications.**

In: Plant Systematics and Evolution 243 (1-2), p. 39–58. DOI: 10.1007/s00606-003-0062-6.

**UTTERIDGE, TIMOTHY M.A. (2012):**

**Four new Species of *Maesa* Forssk. (Primulaceae) from Malesia.**

In: Kew Bulletin 67 (3), p. 367–378. DOI: 10.1007/s12225-012-9383-3.

## Magnoliaceae

**AZUMA, HIROSHI; GARCÍA-FRANCO, JOSÉ G.; RICO-GRAY, VICTOR; THIEN, LEONARD B. (2001):**

**Molecular Phylogeny of the Magnoliaceae: the Biogeography of Tropical and Temperate Disjunctions.**

In: American Journal of Botany 88 (12), p. 2275–2285.

**KIM, SANGTAE; PARK, CHONG-WOOK; KIM, YOUNG-DONG; SUH, YOUNGBAE (2001):**

**Phylogenetic Relationships in Family Magnoliaceae inferred from Ndhf Sequences.**

In: American Journal of Botany 88 (4), p. 717–728.

**KUMAR, V.SAMPATH (2006):**

**New Combinatuons and new Names in Asian Magnoliaceae.**

In: Kew Bulletin 61 (2), p. 183–186.

**NIE, ZE-LONG; WEN, JUN; AZUMA, HIROSHI; QIU, YIN-LONG; SUN, HANG; MENG, YING ET AL. (2008):**

**Phylogenetic and biogeographic complexity of Magnoliaceae in the Northern Hemisphere inferred from three nuclear Data Sets.**

In: Molecular Phylogenetics and Evolution 48 (3), p. 1027–1040. DOI: 10.1016/j.ympev.2008.06.004.

**WANG, YA-LING (2006):**

**The utility of matK Gene in the phylogenetic Analysis of the Genus *Magnolia*.**

In: Acta Phytotaxonomica Sinica 44 (2), p. 135. DOI: 10.1360/aps040013.

**WANG, YA-LING; EJDER, ERLAND; YANG, JIAN-FEN; LIU, R. A.O.; YE, LI-MING; HE, ZI-CAN; ZHANG, SHOU-ZHOU (2013):**  
***Magnolia sinostellata* and relatives (Magnoliaceae).**

In: Phytotaxa 154 (1), p. 47. DOI: 10.11646/phytotaxa.154.1.3.

## Malesherbiaceae

**GENGLER-NOWAK, KARLA M. (2003):**

**Molecular Phylogeny and Taxonomy of Malesherbiaceae.**

In: Systematic Botany 28 (2), p. 333–344.

**WEIGEND, MAXIMILIAN; JOSSBERGER, THOMAS; BELTRÁN, HAMILTON (2015):**

**Notes on *Malesherbia* (Passifloraceae) in Peru: a new Species from southern Peru, a new record and a first report on interspecific Hybridization in *Malesherbia*.**

In: Phytotaxa 202 (4), p. 250. DOI: 10.11646/phytotaxa.202.4.2.

## Malpighiaceae

**DAVIS, CHARLES C.; ANDERSON, WILLIAM R. (2010):**

**A complete generic Phylogeny of Malpighiaceae inferred from nucleotide Sequence Data and Morphology.**

In: American Journal of Botany 97 (12), p. 2031–2048. DOI: 10.3732/ajb.1000146.

**DAVIS, CHARLES C.; ANDERSON, WILLIAM R.; DONOGHUE, MICHAEL J. (2001):**

**Phylogeny of Malpighiaceae: Evidence from Chloroplast *ndhF* and *trnI-F* Nucleotide Sequences.**

In: American Journal of Botany 88 (10), p. 1830–1846. DOI: 10.2307/3558360.

**DAVIS, CHARLES C.; BELL, CHARLES D.; FRITSCH, PETER W.; MATHEWS, SARAH (2002):**

**Phylogeny of *Acridocarpus-Brachylophon* (Malpighiaceae): Implications for Tertiary Tropical Floras and Afroasian Biogeography.**

In: Evolution 56 (12), p. 2395–2405. DOI: 10.1554/0014-3820(2002)056[2395:POABMI]2.0.CO;2.

**DAVIS, CHARLES C.; FRITSCH, PETER W.; BELL, CHARLES D.; MATHEWS, SARAH (2004):**

**High-Latitude Tertiary Migrations of an exclusively tropical Clade: Evidence from Malpighiaceae.**

In: International Journal of Plant Sciences 165 (S4), S107-S121.

## Malpighiales

**DAVIS, CHARLES C.; CHASE, MARK W. (2004):**

**Elatinaceae are sister to Malpighiaceae; Peridiscaceae belong to Saxifragales.**

In: American Journal of Botany 91 (2), p. 262–273. DOI: 10.3732/ajb.91.2.262.

**KOROTKOVA, NADJA; SCHNEIDER, JULIO VALENTIN; QUANDT, DIETMAR; WORBERG, ANDREAS; ZIZKA, GEORG; BORSCH, THOMAS (2009):**

**Phylogeny of the Eudicot Order Malpighiales: Analysis of a Recalcitrant Clade with Sequences of the *petD* Group II Intron.**

In: Plant Systematics and Evolution 282 (3-4), p. 201–228. DOI: 10.1007/s00606-008-0099-7.

**RUHFEL, BRADLEY R.; BITTRICH, VOLKER; BOVE, CLAUDIA P.; GUSTAFSSON, MATS H.G.; PHILBRICK, C. THOMAS; RUTISHAUSER, ROLF ET AL. (2011):**

**Phylogeny of the clusioid Clade (Malpighiales): Evidence from the Plastid and mitochondrial Genomes.**

In: American Journal of Botany 98 (2), p. 306–325. DOI: 10.3732/ajb.1000354.

**WURDACK, KENNETH J.J.; DAVIS, CHARLES C. (2009):**

**Malpighiales Phylogenetics: Gaining Ground on one of the most Recalcitrant Clades in the Angiosperm Tree of Life.**

In: American Journal of Botany 96 (8), p. 1551–1570. DOI: 10.3732/ajb.0800207.

**XI, ZHENXIANG; RUHFEL, BRADLEY R.; SCHAEFER, HANNO; AMORIM, ANDRÉ M.; SUGUMARAN, M.; WURDACK, KENNETH J.J. ET AL. (2012):**

**Phylogenomics and a posteriori Data Partitioning resolve the Cretaceous Angiosperm Radiation Malpighiales.**

In: Proceedings of the National Academy of Sciences of the United States of America 109 (43), p. 17519–17524. DOI: 10.1073/pnas.1205818109.

## Malvaceae

AGUILAR, JAVIER FUERTES; FRYXELL, PAUL A.; JANSEN, ROBERT K. (2003):

**Phylogenetic Relationships and Classification of the Sida Generic Alliance (Malvaceae) based on nrDNA ITS Evidence.**

In: Systematic Botany 28 (2), p. 352–364.

ÁLVAREZ, INÉS; CRONN, RICHARD C.; WENDEL, JONATHAN F. (2005):

**Phylogeny of the New World diploid Cottons (*Gossypium* L., Malvaceae) based on Sequences of three low-copy nuclear Genes.**

In: Plant Systematics and Evolution 252 (3-4), p. 199–214. DOI: 10.1007/s00606-004-0294-0.

ANDREASEN, KATARINA (2012):

**Phylogeny, Hybridization, and Evolution of Habit and Breeding System in *Sidalcea* and *Eremalche* (Malvaceae).**

In: International Journal of Plant Sciences 173 (5), p. 532–548. DOI: 10.1086/665269.

ANDREASEN, KATARINA; BALDWIN, BRUCE G. (2003):

**Reexamination of Relationships, habit Evolution, and Phylogeography of checker Mallows (*Sidalcea*; Malvaceae) based on molecular phylogenetic Data.**

In: American Journal of Botany 90 (3), p. 436–444. DOI: 10.3732/ajb.90.3.436.

ARECES-BERAZAIN, F.; ACKERMAN, J. D. (2016):

**Phylogenetics, Delimitation and historical Biogeography of the pantropical Tree Genus *Thespesia* (Malvaceae, Gossypieae).**

In: Botanical Journal of the Linnean Society 181 (2), p. 171–198. DOI: 10.1111/boj.12414.

BLANCHARD, ORLAND J. (2012):

**Chromosome Numbers, Phytogeography, and Evolution in *Kosteletzkya* (Malvaceae).**

In: Rhodora 114 (957), p. 37–49. DOI: 10.3119/0035-4902-114.957.37.

BOVINI, MASSIMO GIUSEPPE; BAUMGRATZ, JOSÉ FERNANDO A. (2016):

**Taxonomic Revision of *Wissadula* (Malvoideae, Malvaceae) in Brazil.**

In: Phytotaxa 243 (3), p. 201. DOI: 10.11646/phytotaxa.243.3.1.

CRONN, RICHARD C.; SMALL, RANDALL L.; HASELKORN, TAMARA; WENDEL, JONATHAN F. (2002):

**Rapid Diversification of the cotton Genus (*Gossypium*: Malvaceae) revealed by Analysis of sixteen nuclear and Chloroplast Genes.**

In: American Journal of Botany 89 (4), p. 707–725. DOI: 10.3732/ajb.89.4.707.

DONNELL, ALIYA A.; CANTINO, PHILIP D.; BALLARD, HARVEY EUGENE (2015):

**A phenetic Analysis of the *Bakeridesia integerrima* complex (Malvaceae).**

In: Brittonia 67 (3), p. 250–271. DOI: 10.1007/s12228-015-9362-8.

ESCOBAR GARCÍA, PEDRO; PAKRAVAN, MANEEZHEH; SCHÖNSWETTER, PETER; AGUILAR, JAVIER FUERTES; SCHNEEWEISS, GERALD M. (2012):

**Phylogenetic Relationships in the species-rich Irano-Turanian Genus *Alcea* (Malvaceae).**

In: Taxon 61 (2), p. 324–332. DOI: 10.1002/tax.612004.

ESCOBAR GARCÍA, PEDRO; SCHÖNSWETTER, PETER; FUERTES-AGUILAR, JAVIER; NIETO FELINER, GONZALO; SCHNEEWEISS, GERALD M. (2009):

- Five molecular Markers reveal extensive morphological homoplasy and reticulate Evolution in the *Malva* alliance (Malvaceae).**  
In: Molecular Phylogenetics and Evolution 50 (2), p. 226–239. DOI: 10.1016/j.ympev.2008.10.015.
- GROVER, CORRINNE E.; GALLAGHER, JOSEPH P.; JARECZEK, JOSEF J.; PAGE, JUSTIN T.; UDALL, JOSHUA A.; GORE, MICHAEL A.; WENDEL, JONATHAN F. (2015):**  
**Re-evaluating the Phylogeny of allopolyploid *Gossypium* L.**  
In: Molecular Phylogenetics and Evolution 92, p. 45–52. DOI: 10.1016/j.ympev.2015.05.023.
- GROVER, CORRINNE E.; GRUPP, K. K.; WANZEK, R. J.; WENDEL, JONATHAN F. (2012):**  
**Assessing the Monophyly of polyploid *Gossypium* Species.**  
In: Plant Systematics and Evolution 298 (6), p. 1177–1183. DOI: 10.1007/s00606-012-0615-7.
- HEENAN, PETER B.; DAWSON, MURRAY I.; REDMOND, D. N.; WAGSTAFF, STEVEN J. (2005):**  
**Relationships of the New Zealand mountain Ribbonwoods (*Hoheria glabrata* and *H. lyallii*: Malvaceae), based on molecular and morphological Data.**  
In: New Zealand Journal of Botany 43 (2), p. 527–549. DOI: 10.1080/0028825X.2005.9512973.
- HUERTAS, MARILÚ L.; SCHNEIDER, JULIO VALENTIN; ZIZKA, GEORG (2007):**  
**Phylogenetic Analysis of *Palaua* (Malveae, Malvaceae) based on Plastid and Nuclear Sequences.**  
In: Systematic Botany 32 (1), p. 157–165.
- KOOPMAN, MARGARET M.; BAUM, DAVID A. (2008):**  
**Phylogeny and Biogeography of Tribe Hibisceae (Malvaceae) on Madagascar.**  
In: Systematic Botany 33 (2), p. 364–374. DOI: 10.1600/036364408784571653.
- KRAPOVICKAS, ANTONIO (2015):**  
**Notas sobre *Urocarpidium* y *Fuertesimalva* (Malvaceae).**  
In: Bonplandia 24 (1), p. 43–48.
- NEUBIG, KURT M.; JR., ORLAND J. BLANCHARD; WHITTEN, WILLIAM MARK; MCDANIEL, STUART F. (2015):**  
**Molecular Phylogenetics of *Kosteletzkya* (Malvaceae, Hibisceae) reveals multiple independent and successive polyploid Speciation Events.**  
In: Botanical Journal of the Linnean Society 179, p. 421–435. DOI: 10.1111/boj.12330.
- PAKRAVAN, MANEEZHEH; GHAREMAN, A. (2003):**  
**Some new Combinations and Synonyms in *Alcea* (Malvaceae) from Iran.**  
In: Annalen des Naturhistorischen Museums in Wien, Serie B 104, p. 713–716.
- PFEIL, BERNARD E.; CRISP, MICHAEL D. (2005):**  
**What to do with *Hibiscus*? A proposed nomenclatural resolution for a large and well known Genus of Malvaceae and comments on Paraphyly.**  
In: Australian Systematic Botany 18 (1), p. 49–60. DOI: 10.1071/SB04024.
- SATYA, PRATIK; KARAN, M.; KAR, C. S.; MAHAPATRA, A. K.; MAHAPATRA, B. P. (2013):**  
**Assessment of molecular Diversity and evolutionary Relationship of Kenaf (*Hibiscus cannabinus* L.), roselle (*H. sabdariffa* L.) and their wild Relatives.**  
In: Plant Systematics and Evolution 299 (3), p. 619–629. DOI: 10.1007/s00606-012-0748-8.
- SCHNEIDER, JULIO VALENTIN; SCHULTE, KATHARINA; AGUILAR, JAVIER FUERTES; HUERTAS, MARILÚ L. (2011):**  
**Molecular Evidence for Hybridization and introgression in the Neotropical coastal desert-endemic *Palaua* (Malveae, Malvaceae).**  
In: Molecular Phylogenetics and Evolution 60 (3), p. 373–384. DOI: 10.1016/j.ympev.2011.05.010.
- SMALL, L. (2004):**

**Phylogeny of *Hibiscus* Sect. *Muenchusia* (Malvaceae) based on Chloroplast rpL16 and ndhF, and Nuclear ITS and GBSSI Sequences.**

In: Systematic Botany 29 (2), p. 385–392. DOI: 10.1600/036364404774195575.

**TABBASAM, NABILA; ZAFAR, YUSUF; MEHBOOB-UR-RAHMAN (2014):**

**Pros and Cons of using genomic SSRs and EST-SSRs for resolving Phylogeny of the Genus *Gossypium*.**

In: Plant Systematics and Evolution 300 (3), p. 559–575. DOI: 10.1007/s00606-013-0891-x.

**TATE, JENNIFER A. (2011):**

**The Status of *Urocarpidium* (Malvaceae): Insight from nuclear and plastid-based Phylogenies.**

In: Taxon 60 (5), p. 1330–1338. DOI: 10.1002/tax.605009.

**TATE, JENNIFER A.; FUERTES-AGUILAR, JAVIER; WAGSTAFF, STEVEN J.; LA DUKE, JOHN C.; BODO SLOTTA, TRACEY A.; SIMPSON, BERYL B. (2005):**

**Phylogenetic Relationships within the Tribe Malveae (Malvaceae, Subfamily Malvoideae) as inferred from ITS Sequence Data.**

In: American Journal of Botany 92 (4), p. 584–602. DOI: 10.3732/ajb.92.4.584.

**WAGSTAFF, STEVEN J.; TATE, JENNIFER A. (2011):**

**Phylogeny and Character Evolution in the New Zealand endemic Genus *Plagianthus* (Malveae, Malvaceae).**

In: Systematic Botany 36 (2), p. 405–418. DOI: 10.1600/036364411X569589.

**ZHU, HUAYU; LV, JUNHONG; ZHAO, LIANG; TONG, XIANGCHAO; ZHOU, BAOLIANG; ZHANG, TIANZHEN; GUO, WANGZHEN (2012):**

**Molecular Evolution and phylogenetic Analysis of Genes related to Cotton Fibers Development from wild and domesticated Cotton Species in *Gossypium*.**

In: Molecular Phylogenetics and Evolution 63 (3), p. 589–597. DOI: 10.1016/j.ympev.2012.01.025.

## Malvales

**ALVERSON, WILLIAM S.; WHITLOCK, BARBARA A.; NYFFELER, RETO; BAYER, CLEMENS; BAUM, DAVID A. (1999):**

**Phylogeny of the core Malvales: Evidence from ndh F Sequence Data.**

In: American Journal of Botany 86 (10), p. 1474–1486. DOI: 10.2307/2656928.

**NYFFELER, RETO; BAYER, CLEMENS; ALVERSON, WILLIAM S.; YEN, ALAN C.; WHITLOCK, BARBARA A.; CHASE, MARK W.; BAUM, DAVID A. (2005):**

**Phylogenetic Analysis of the *Malvadendrina* Clade (Malvaceae s.l.) based on Plastid DNA Sequences.**

In: Organisms Diversity and Evolution 5 (2), p. 109–123. DOI: 10.1016/j.ode.2004.08.001.

## Marantaceae

**ANDERSSON, LENNART; CHASE, MARK W. (2001):**

**Phylogeny and Classification of Marantaceae.**

In: Botanical Journal of the Linnean Society 135 (3), p. 275–287. DOI: 10.1111/j.1095-8339.2001.tb01097.x.

**LEY, ALEXANDRA C.; CLABEN-BOCKHOFF, REGINE (2011):**

**Evolution in African Marantaceae - Evidence from Phylogenetic, Ecological and morphological Studies.**

In: Systematic Botany 36 (2), p. 277–290. DOI: 10.1600/036364411X569480.

**LEY, ALEXANDRA C.; HARDY, OLIVIER J. (2014):**

**Contrasting Patterns of Gene flow between sister plant Species in the Understorey of African moist Forests - the Case of sympatric and parapatric Marantaceae Species.**

In: *Molecular Phylogenetics and Evolution* 77, p. 264–274. DOI: 10.1016/j.ympev.2014.04.026.

PISCHTSCHAN, ELKE; LEY, ALEXANDRA C.; CLABEN-BOCKHOFF, REGINE (2010):

**Ontogenetic and phylogenetic Diversification of the hooded staminode in Marantaceae.**

In: *Taxon* 59 (4), p. 1111–1125.

PRINCE, LINDA M.; KRESS, W. JOHN (2006):

**Phylogenetic Relationships and Classification in Marantaceae: Insights from Plastid DNA Sequence Data.**

In: *Taxon* 55 (2), p. 281. DOI: 10.2307/25065578.

SUKSATHAN, PIYAKASET; GUSTAFSSON, MATS H.G.; BORCHSENIUS, FINN (2009):

**Phylogeny and generic Delimitation of Asian Marantaceae.**

In: *Botanical Journal of the Linnean Society* 159 (3), p. 381–395. DOI: 10.1111/j.1095-8339.2009.00949.x.

VIEIRA, SILVANA; MAAS, PAUL J.M.; BORCHSENIUS, FINN (2012):

**Taxonomic Revision of *Myrosma* (Marantaceae).**

In: *Blumea* 57 (2), p. 125–130. DOI: 10.3767/000651912X654218.

VIEIRA, SILVANA; SOUZA, VINICIUS CASTRO (2008):

**Four new Species of *Maranta* L. (Marantaceae) from Brazil.**

In: *Botanical Journal of the Linnean Society* 158 (1), p. 131–139. DOI: 10.1111/j.1095-8339.2008.00852.x.

## Marattiaceae

CHRISTENHUSZ, MAARTEN J.M. (2010):

***Danaea* (Marattiaceae) revisited: Biodiversity, a new Classification and ten new Species of a Neotropical Fern Genus.**

In: *Botanical Journal of the Linnean Society* 163, p. 360–385.

CHRISTENHUSZ, MAARTEN J.M. (2010):

**Revision of the Neotropical Fern Genus *Eupodium* (Marattiaceae).**

In: *Kew Bulletin* 65, p. 115–121.

CHRISTENHUSZ, MAARTEN J.M.; TUOMISTO, HANNA; METZGAR, JORDAN S.; PRYER, KATHLEEN M. (2008):

**Evolutionary Relationships within the Neotropical, Eusporangiate Fern Genus *Danaea* (Marattiaceae).**

In: *Molecular Phylogenetics and Evolution* 46 (1), p. 34–48. DOI: 10.1016/j.ympev.2007.09.015.

MURDOCK, ANDREW G. (2008):

**A taxonomic Revision of the Eusporangiate Fern Family Marattiaceae, with Description of a new Genus *Ptisana*.**

In: *Taxon* 57 (3), p. 737–755.

MURDOCK, ANDREW G. (2008):

**Phylogeny of Marattioid Ferns (Marattiaceae): inferring a Root in the Absence of a closely related Outgroup.**

In: *American Journal of Botany* 95 (5), p. 626–641. DOI: 10.3732/ajb.2007308.

## Marcgraviaceae

WARD, N. MISA; PRICE, ROBERT A. (2002):

**Phylogenetic Relationships of Marcgraviaceae: Insights from three Chloroplast Genes.**

In: Systematic Botany 27 (1), p. 149–160.

## Marsileaceae

NAGALINGUM, NATHALIE S.; SCHNEIDER, HARALD; PRYER, KATHLEEN M. (2007):

### **Molecular phylogenetic Relationships and morphological Evolution in the Heterosporous Fern Genus *Marsilea*.**

In: Systematic Botany 32 (1), p. 16–25. DOI: 10.1600/036364407780360256.

## Martyniaceae

GUTIERREZ, RAUL (2008):

### **Preliminary Chloroplast DNA Studies in the Flowering Plant Family Martyniaceae (Order Lamiales).**

In: Journal of the Arizona-Nevada Academy of Science 40 (1), p. 105–110. DOI: 10.2181/1533-6085(2008)40[105:PCDSIT]2.0.CO;2.

## Maundiaceae

SOKOLOFF, DMITRY D.; MERING, SABINE; JACOBS, SURREY W.L.; REMIZOWA, MARGARITA V. (2013):

### **Morphology of *Maundia* supports its isolated phylogenetic Position in the early-divergent Monocot Order Alismatales.**

In: Botanical Journal of the Linnean Society 173 (1), p. 12–45. DOI: 10.1111/boj.12068.

## Melanthiaceae

FARMER, SUSAN N.; SCHILLING, EDWARD E. (2002):

### **Phylogenetic Analyses of Trilliaceae based on morphological and molecular Data.**

In: Systematic Botany 27 (4), p. 674–692.

FUSE, SHIZUKA; SOOK LEE, NAM N.; TAMURA, MINORU N. (2004):

### **Biosystematic studies on the Genus *Heloniopsis* (Melanthiaceae) II. Two new Species from Korea based on morphological and molecular Evidence.**

In: Taxon 53 (4), p. 949–958. DOI: 10.2307/4135562.

HSU, TSAI-WEN; KONO, YOSHIKO; CHIANG, TZEN-YUH; PENG, CHING-I. (2011):

### ***Ypsilandra* (Melanthiaceae; Liliaceae sensu lato), a new generic record for Taiwan.**

In: Botanical Studies 52, p. 99–104.

Ji, YUNHENG; FRITSCH, PETER W.; LI, HENG; XIAO, TIAOJIANG; ZHOU, ZHEKUN (2006):

### **Phylogeny and Classification of *Paris* (Melanthiaceae) inferred from DNA Sequence Data.**

In: Annals of Botany 98 (1), p. 245–256. DOI: 10.1093/aob/mcl095.

KIM, JIN OHK; TAMURA, MINORU N.; FUSE, SHIZUKA; LEE, NAM SOOK (2014):

### **Taxonomic Status and Phylogeny of *Veratrum* Section *Veratrum* (Melanthiaceae) in Korea and Japan based on Chloroplast and nuclear Sequence Data.**

In: Plant Systematics and Evolution 300 (1), p. 75–89. DOI: 10.1007/s00606-013-0861-3.

KIM, JUNG SUNG; BODIN, SARAH S.; KIM, JOO-HWAN (2015):

### **Complete Chloroplast Genome of *Chionographis japonica* (Willd.) Maxim. (Melanthiaceae): Comparative Genomics and Evaluation of Universal Primers for Liliales.**

In: Plant Molecular Biology Reporter. DOI: 10.13140/2.1.4598.6249.

KIM, SANG-CHUL; KIM, JUNG SUNG; CHASE, MARK W.; FAY, MICHAEL F.; KIM, JOO-HWAN (2016):



**Molecular phylogenetic Relationships of Melanthiaceae (Liliales) based on Plastid DNA Sequences.**

In: Botanical Journal of the Linnean Society 181 (4), p. 567–584. DOI: 10.1111/boj.12405.

**LIAO, WAN-JIN; YUAN, YONG-MING; ZHANG, D.-Y. (2007):**

**Biogeography and Evolution of flower color in *Veratrum* (Melanthiaceae) through Inference of a Phylogeny based on multiple DNA Markers.**

In: Plant Systematics and Evolution 267 (1-4), p. 177–190. DOI: 10.1007/s00606-007-0528-z.

**OSALOO, SHAHROKH KAZEMPOUR; KAWANO, SHOICHI (1999):**

**Molecular Systematics of Trilliaceae II. phylogenetic Analyses of *Trillium* and its allies using Sequences of *rbcl* and *matK* Genes of cp DNA and internal transcribed Spacers of 18s-26s nrDNA.**

In: Plant Species Biology 14 (1), p. 75–94. DOI: 10.1046/j.1442-1984.1999.00009.x.

**PELLICER, JAUME; KELLY, LAURA J.; LEITCH, ILIA J.; ZOMLEFER, WENDY B.; FAY, MICHAEL F. (2014):**

**A universe of dwarfs and giants: Genome size and Chromosome Evolution in the Monocot Family Melanthiaceae.**

In: the new Phytologist 201 (4), p. 1484–1497. DOI: 10.1111/nph.12617.

**SCHILLING, EDWARD E.; FLODEN, AARON; FARMER, SUSAN B. (2013):**

**A new sessile-flowered *Trillium* Species from Tennessee.**

In: Castanea 78 (2), p. 140–147. DOI: 10.2179/12-043.

**TANAKA, NORIYUKI (2017):**

**A Synopsis of the Genus *Chamaelirium* (Melanthiaceae) with a new infrageneric Classification including *Chionographis*.**

In: Taiwaniana 62 (2), p. 157–167.

**ZOMLEFER, WENDY B.; JUDD, WALTER P. (2008):**

**Two new Species of *Schoenocaulon* (Liliales: Melanthiaceae) from Mexico supported by ITS Sequence Data.**

In: Systematic Botany 33 (1), p. 117–124. DOI: 10.1600/036364408783887474.

**ZOMLEFER, WENDY B.; WHITTEN, WILLIAM MARK; WILLIAMS, NORRIS H.; JUDD, WALTER P. (2003):**

**An Overview of *Veratrum* s.l. (Liliales: Melanthiaceae) and an Infrageneric Phylogeny based on ITS Sequence Data.**

In: Systematic Botany 28 (2), p. 250–269.

**ZOMLEFER, WENDY B.; WHITTEN, WILLIAM MARK; WILLIAMS, NORRIS H.; JUDD, WALTER P. (2006):**

**Infrageneric Phylogeny of *Schoenocaulon* (Liliales: Melanthiaceae) with Clarification of cryptic Species based on ITS Sequence Data and geographical Distribution.**

In: American Journal of Botany 93 (8), p. 1178–1192. DOI: 10.3732/ajb.93.8.1178.

**ZOMLEFER, WENDY B.; WILLIAMS, NORRIS H.; WHITTEN, WILLIAM MARK; JUDD, WALTER P. (2001):**

**Generic Circumscription and Relationships in the Tribe Melanthieae (Liliales, Melanthiaceae), with Emphasis on *Zigadenus* : Evidence from ITS and *trnL-F* Sequence Data.**

In: American Journal of Botany 88 (9), p. 1657–1669. DOI: 10.2307/3558411.

## **Melastomataceae**

**ALMEDA, FRANK (1993):**

***Stanmarkia*, a new Genus of Melastomataceae from the Volcanic Highlands of Western Guatemala and Adjacent Mexico.**

In: Brittonia 45 (3), p. 187–203. DOI: 10.2307/2807100.

**AMORIM, ANDRÉ M.; GOLDENBERG, RENATO; MICHELANGELI, FABIÁN ARMANDO (2009):**

**A new Species of *Physeterostemon* (Melastomataceae) from Bahia, Brazil, with Notes on the Phylogeny of the Genus.**

In: Systematic Botany 34 (2), p. 324–329. DOI: 10.1600/036364409788606389.

**CÁMARA-LERET, R.; RIDDER-NUMAN, J.W.A.; VELDKAMP, J. F. (2013):**

**Revision of *Heteroblemma* gen. nov. (Dissochaeteae – Melastomataceae) from Malesia and Vietnam.**

In: Blumea 58 (3), p. 229–240. DOI: 10.3767/000651913X674945.

**CÁMARA-LERET, R.; VELDKAMP, J. F. (2011):**

**A remarkable new *Medinilla* (Melastomataceae) from Celebes (Sulawesi), Indonesia.**

In: Gardens' Bulletin Singapore 62 (2), p. 213–221.

**CELLINESE, NICOLETTA; RENNER, SUSANNE P. (1997):**

**New Species and new Combinations in *Sonerila* and *Phyllagathis* (Melastomataceae) from Thailand.**

In: Novon: A Journal for Botanical Nomenclature 7, p. 106–112.

**CLAUSING, G. (2001):**

**Evolution of Growth form in epiphytic Dissochaeteae (Melastomataceae).**

In: Organisms Diversity and Evolution 1 (1), p. 45–60. DOI: 10.1078/1439-6092-00004.

**CLAUSING, G.; RENNER, SUSANNE P. (2001):**

**Molecular Phylogenetics of Melastomataceae and Memecylaceae: Implications for Character Evolution.**

In: American Journal of Botany 88 (3), p. 486–498. DOI: 10.2307/2657114.

**FIDANZA, KARINA; ALMEDA, FRANK (2011):**

**New Species of the Brazilian Endemic Genus *Cambessedesia* (Melastomataceae).**

In: Harvard Papers in Botany 16 (1), p. 57–63. DOI: 10.3100/025.016.0109.

**FRITSCH, PETER W.; ALMEDA, FRANK; RENNER, SUSANNE S.; MARTINS, ANGELA B.; CRUZ, BONI C. (2004):**

**Phylogeny and Circumscription of the near-endemic Brazilian Tribe Microlicieae (Melastomataceae).**

In: American Journal of Botany 91 (7), p. 1105–1114. DOI: 10.3732/ajb.91.7.1105.

**GOLDENBERG, RENATO; ALMEDA, FRANK; CADDAH, MAYARA KRASINSKI; MARTINS, ANGELA B.; MEIRELLES, JULIA; MICHELANGELI, FABIÁN ARMANDO; WEISS, MARKUS (2013):**

**Nomenclator Botanicus for the Neotropical Genus *Miconia* (Melastomataceae: Miconieae).**

In: Phytotaxa 106 (1), p. 1. DOI: 10.11646/phytotaxa.106.1.1.

**GOLDENBERG, RENATO; AMORIM, ANDRÉ M. (2006):**

***Physeterostemon* (Melastomataceae): a new Genus and two new Species from the Bahian Atlantic Forest, Brazil.**

In: Taxon 55 (4), p. 965–972. DOI: 10.2307/25065690.

**GOLDENBERG, RENATO; FRAGA, CLAUDIO N.; FONTANA, ANDRÉ P.; NICOLAS, ANTOINE N.; MICHELANGELI, FABIÁN ARMANDO (2012):**

**Taxonomy and Phylogeny of *Merianthera* (Melastomataceae).**

In: Taxon 61 (5), p. 1040–1056. DOI: 10.1002/tax.615010.

- GOLDENBERG, RENATO; PENNEYS, DARIN S.; ALMEDA, FRANK; JUDD, WALTER S.; MICHELANGELI, FABIÁN ARMANDO (2008):**  
**Phylogeny of *Miconia* (Melastomataceae): Patterns of Stamen Diversification in a Megadiverse Neotropical Genus.**  
In: International Journal of Plant Sciences 169 (7), p. 963–979. DOI: 10.1086/589697.
- IONTA, GRETCHEN M.; JUDD, WALTER S.; WILLIAMS, NORRIS H.; WHITTEN, WILLIAM MARK (2007):**  
**Phylogenetic Relationships in *Rhexia* (Melastomataceae): Evidence from DNA Sequence Data and Morphology.**  
In: International Journal of Plant Sciences 168 (7), p. 1055–1066.
- JR., JACINTO C. REGALADO (1990):**  
**Revision of *Medinilla* (Melastomataceae) of Borneo.**  
In: Blumea 35, p. 5–70.
- KARTONEGORO, A.; VELDKAMP, J. F. (2013):**  
**Revision of *Creochiton* (Melastomataceae ).**  
In: Blumea 58 (3), p. 217–227. DOI: 10.3767/000651913X674134.
- KRIEBEL, RICARDO (2016):**  
**Phylogenetic Placement of the monotypic Genus *Schwackaea* (Melastomeae: Melastomataceae) and the Evolution of its unique Fruit.**  
In: International Journal of Plant Sciences 177 (5), p. 440–448. DOI: 10.1086/685689.
- KRIEBEL, RICARDO; MICHELANGELI, FABIÁN ARMANDO; KELLY, LAWRENCE M. (2015):**  
**Discovery of unusual anatomical and continuous Characters in the evolutionary History of *Conostegia* (Miconieae: Melastomataceae).**  
In: Molecular Phylogenetics and Evolution 82, p. 289–313. DOI: 10.1016/j.ympev.2014.09.021.
- MAJURE, LUCAS C.; NEUBIG, KURT M.; SKEAN, J. DAN; BÉCQUER, ELDIS R.; JUDD, WALTER P. (2015):**  
**Evolution of the Sandpaper Clade (Miconieae, Melastomataceae).**  
In: International Journal of Plant Sciences 176 (7), p. 607–626. DOI: 10.1086/682148.
- MARTIN, CLAIRE V.; LITTLE, DAMON P.; GOLDENBERG, RENATO; MICHELANGELI, FABIÁN ARMANDO (2008):**  
**A phylogenetic Evaluation of *Leandra* (Miconieae, Melastomataceae): a polyphyletic Genus where the Seeds tell the Story, not the Petals.**  
In: Cladistics 24 (3), p. 315–327. DOI: 10.1111/j.1096-0031.2007.00185.x.
- MEYER, KARSTEN (2001):**  
**Revision of the Southeast Asian Genus *Melastoma* (Melastomataceae).**  
In: Blumea 46, p. 351–398.
- MICHELANGELI, FABIÁN ARMANDO; CARMENATE REYES, WILDER; SOSA, KARLA (2015):**  
**A Revision of *Meriania* (Melastomataceae) in the Greater Antilles with Emphasis on the Status of the Cuban Species.**  
In: Brittonia 67 (2), p. 118–137. DOI: 10.1007/s12228-015-9366-4.
- MICHELANGELI, FABIÁN ARMANDO; GUIMARAES, PAULO J. F.; PENNEYS, DARIN S.; ALMEDA, FRANK; KRIEBEL, RICARDO (2013):**  
**Phylogenetic Relationships and Distribution of New World Melastomeae (Melastomataceae).**  
In: Botanical Journal of the Linnean Society 171, p. 38–60.
- MICHELANGELI, FABIÁN ARMANDO; NICOLAS, ANTOINE N.; MORALES-P, MARÍA EUGENIA; DAVID, HERIBERTO (2011):**

- Phylogenetic Relationships of *Allomaieta*, *Alloneuron*, *Cyphostyla*, and *Wurdastom* (Melastomataceae) and the Resurrection of the Tribe Cyphostyleae.**  
In: International Journal of Plant Sciences 172 (9), p. 1165–1178. DOI: 10.1086/662032.
- MICHELANGELI, FABIÁN ARMANDO; PENNEYS, DARIN S.; GIZA, JOANNA; SOLTIS, DOUGLAS E.; HILS, MATHEW H.; SKEAN, J. DAN (2004):**  
**A preliminary Phylogeny of the Tribe Miconieae (Melastomataceae) based on nrITS Sequence Data and its Implications on Inflorescence Position.**  
In: Taxon 53 (2), p. 279–290. DOI: 10.2307/4135608.
- MORLEY, ROBERT J.; DICK, CHRISTOPHER W. (2003):**  
**Missing fossils, molecular Clocks, and the Origin of the Melastomataceae.**  
In: American Journal of Botany 90 (11), p. 1638–1644. DOI: 10.3732/ajb.90.11.1638.
- OLIVEIRA DA SILVA, MARCUS FELIPPE; FERNANDES GUIMARÃES, PAULO JOSÉ; MICHELANGELI, FABIÁN ARMANDO (2014):**  
**Nomenclatural and taxonomic Novelties in the Tribe Melastomeae (Melastomataceae).**  
In: Phytotaxa 186 (4), p. 222. DOI: 10.11646/phytotaxa.186.4.6.
- PENNEYS, DARIN S.; JUDD, WALTER P. (2005):**  
**A Systematic Revision and Cladistic Analysis of *Charianthus* (Melastomataceae) using morphological and molecular Characters.**  
In: Systematic Botany 30 (3), p. 559–584.
- PENNEYS, DARIN S.; JUDD, WALTER P. (2011):**  
**Phylogenetics and Morphology in the Blakeeae (Melastomataceae).**  
In: International Journal of Plant Sciences 172 (1), p. 78–106. DOI: 10.1086/657284.
- PENNEYS, DARIN S.; JUDD, WALTER P. (2013):**  
**A revised Circumscription for the Blakeeae (Melastomataceae) with associated nomenclatural Adjustments.**  
In: PhytoKeys (20), p. 17–32. DOI: 10.3897/phytokeys.20.4344.
- PENNEYS, DARIN S.; JUDD, WALTER P. (2013):**  
**Combined molecular and morphological phylogenetic Analyses of the Blakeeae (Melastomataceae).**  
In: International Journal of Plant Sciences 174 (5), p. 802–817. DOI: 10.1086/670011.
- PENNEYS, DARIN S.; MICHELANGELI, FABIÁN ARMANDO; JUDD, WALTER S.; ALMEDA, FRANK (2010):**  
**Henrietteae (Melastomataceae): A new Neotropical Berry-Fruited Tribe.**  
In: Systematic Botany 35 (4), p. 783–800. DOI: 10.1600/036364410X539862.
- PENNEYS, DARIN P. (2013):**  
**Preliminary Phylogeny of the Astronieae (Melastomataceae) based on Nuclear and Plastid DNA Sequence Data, with Comments on the Philippine endemic Genus, *Astrocalyx*.**  
In: Philippine Journal of Science 142, p. 159–168.
- REGINATO, MARCELO; MICHELANGELI, FABIÁN ARMANDO (2016):**  
**Untangling the Phylogeny of *Leandra* s.str. (Melastomataceae, Miconieae).**  
In: Molecular Phylogenetics and Evolution 96, p. 17–32. DOI: 10.1016/j.ympev.2015.11.015.
- REGINATO, MARCELO; MICHELANGELI, FABIÁN ARMANDO; GOLDENBERG, RENATO (2010):**  
**Phylogeny of *Pleiochiton* (Melastomataceae, Miconieae): total Evidence.**  
In: Botanical Journal of the Linnean Society 162, p. 423–434.

RENNER, SUSANNE P. (2004):

**Bayesian Analysis of combined Chloroplast loci, using multiple Calibrations, supports the recent Arrival of Melastomataceae in Africa and Madagascar.**

In: American Journal of Botany 91 (9), p. 1427–1435. DOI: 10.3732/ajb.91.9.1427.

ROCHA, MARIA JOSÉ R.; BATISTA, JOÃO AGUIAR NOGUEIRA; GUIMARAES, PAULO J. F.; MICHELANGELI, FABIÁN ARMANDO (2016):

**Phylogenetic Relationships in the *Marcetia* alliance (Melastomeae, Melastomataceae) and Implications for generic Circumscription.**

In: Botanical Journal of the Linnean Society 181 (4), p. 585–609. DOI: 10.1111/boj.12429.

ROMERO, ROSANA; VERSIANE, ANA FLÁVIA ALVES (2014):

**Taxonomic Novelty and Typifications in *Microlepis* (Melastomataceae).**

In: Novon: A Journal for Botanical Nomenclature 23 (2), p. 217–223. DOI: 10.3417/2011077.

VERANSO-LIBALAH, MARIE CLAIRE; STONE, ROBERT DOUGLAS; FONGOD, AUGUSTINA G.N.; COUVREUR, THOMAS L.P.; KADEREIT, GUDRUN (2017):

**Phylogeny and Systematics of African Melastomateae (Melastomataceae).**

In: Taxon 66 (3), p. 584–614. DOI: 10.12705/663.5.

## Meliaceae

CLARKSON, JAMES J.; PENNINGTON, TERENCE D.; CHASE, MARK W.; HAYNES, GWILYM; ENGSTRAND, RACHEL; KAYE, MARIA ET AL. (2016):

**Phylogenetic Relationships in *Trichilia* (Meliaceae) based on Ribosomal ITS Sequences.**

In: Phytotaxa 259 (1), p. 6. DOI: 10.11646/phytotaxa.259.1.4.

DUMINIL, JÉRÔME; KENFACK, DAVID; VISCOSI, VINCENZO; GRUMIAU, LAURENT; HARDY, OLIVIER J. (2012):

**Testing Species Delimitation in sympatric Species complexes: the case of an African tropical Tree, *Carapa* spp. (Meliaceae).**

In: Molecular Phylogenetics and Evolution 62 (1), p. 275–285. DOI: 10.1016/j.ympev.2011.09.020.

FUKUDA, TATSUYA; YOKOYAMA, JUN U.N.; TSUKAYA, HIROKAZU (2003):

**Phylogenetic Relationships among Species in the Genera *Chisocheton* and *Guarea* that have unique indeterminate Leaves as inferred from Sequences of Chloroplast DNA.**

In: International Journal of Plant Sciences 164 (1), p. 13–24.

GRUDINSKI, MELANIE; PANNELL, CAROLINE M.; CHASE, MARK W.; AHMAD, JOFFRE A.; MÜLLNER-RIEHL, ALEXANDRA N. (2014):

**An Evaluation of taxonomic Concepts of the widespread plant Genus *Aglaia* and its allies across Wallace's Line (tribe Aglaieae, Meliaceae).**

In: Molecular Phylogenetics and Evolution 73, p. 65–76. DOI: 10.1016/j.ympev.2014.01.025.

KOECKE, A. VALERIE; MÜLLNER-RIEHL, ALEXANDRA N.; PENNINGTON, TERENCE D.; SCHORR, GERTRUD; SCHNITZLER, JAN (2013):

**Niche Evolution through time and across Continents: the story of Neotropical *Cedrela* (Meliaceae).**

In: American Journal of Botany 100 (9), p. 1800–1810. DOI: 10.3732/ajb.1300059.

KOENEN, ERIK J. M.; CLARKSON, JAMES J.; PENNINGTON, TERENCE D.; CHATROU, LARS W. (2015):

**Recently evolved Diversity and convergent Radiations of rainforest Mahoganies (Meliaceae) shed new Light on the Origins of Rainforest Hyperdiversity.**

In: the new Phytologist 207 (2), p. 327–339. DOI: 10.1111/nph.13490.

MÜLLNER, ALEXANDRA N.; PENNINGTON, TERENCE D.; CHASE, MARK W. (2009):

**Molecular Phylogenetics of Neotropical Cedreleae (Mahogany Family, Meliaceae) based on nuclear and Plastid DNA Sequences reveal multiple Origins of "*Cedrela odorata*".**

In: *Molecular Phylogenetics and Evolution* 52 (2), p. 461–469. DOI: 10.1016/j.ympev.2009.03.025.

MÜLLNER, ALEXANDRA N.; SAMUEL, ROSABELLE; CHASE, MARK W.; COLEMAN, ANNETTE; STUESSY, TOD F. (2008):

**An Evaluation of Tribes and generic Relationships in Melioideae (Meliaceae) based on nuclear ITS ribosomal DNA.**

In: *Taxon* 57 (1), p. 98–108.

MÜLLNER, ALEXANDRA N.; SAMUEL, ROSABELLE; CHASE, MARK W.; PANNELL, CAROLINE M.; GREGER, HARALD (2005):

***Aglaiia* (Meliaceae): An Evaluation of taxonomic Concepts based on DNA Data and secondary Metabolites.**

In: *American Journal of Botany* 92 (3), p. 534–543.

MÜLLNER, ALEXANDRA N.; SAMUEL, ROSABELLE; JOHNSON, SHEILA A.; CHEEK, MARTIN R.; PENNINGTON, TERENCE D.; CHASE, MARK W. (2003):

**Molecular Phylogenetics of Meliaceae (Sapindales) based on Nuclear and Plastid DNA Sequences.**

In: *American Journal of Botany* 90 (3), p. 471–480.

MÜLLNER, ALEXANDRA N.; SAVOLAINEN, VINCENT; SAMUEL, ROSABELLE; CHASE, MARK W. (2006):

**The Mahogany Family "out-of-Africa": Divergence time Estimation, global Biogeographic Patterns inferred from Plastid *rbcl* DNA Sequences, extant, and fossil Distribution of Diversity.**

In: *Molecular Phylogenetics and Evolution* 40 (1), p. 236–250. DOI: 10.1016/j.ympev.2006.03.001.

PENNINGTON, TERENCE D.; CLARKSON, JAMES J. (2013):

**A Revision of *Guarea* (Meliaceae).**

In: *Edinburgh Journal of Botany* 70 (02), p. 179–362. DOI: 10.1017/S0960428613000036.

## Melanthaceae

LINDER, HANS PETER; DLAMINI, TITUS; HENNING, JACK; VERBOOM, GEORGE ANTHONY (2006):

**The evolutionary History of *Melanthus* (Melanthaceae).**

In: *American Journal of Botany* 93 (7), p. 1052–1064. DOI: 10.3732/ajb.93.7.1052.

## Memecylaceae

STONE, ROBERT DOUGLAS (2006):

**Phylogeny of Major Lineages in Melastomataceae, Subfamily Olisbeoideae: Utility of Nuclear Glyceraldehyde 3-Phosphate Dehydrogenase (GapC) Gene Sequences.**

In: *Systematic Botany* 31 (1), p. 107–121.

STONE, ROBERT DOUGLAS (2014):

**The species-rich, paleotropical Genus *Memecylon* (Melastomataceae): Molecular Phylogenetics and revised infrageneric Classification of the African Species.**

In: *Taxon* 63 (3), p. 539–561. DOI: 10.12705/633.10.

STONE, ROBERT DOUGLAS; ANDREASEN, KATARINA (2010):

**The Afro-Madagascan Genus *Warneckea* (Melastomataceae): Molecular Systematics and revised infrageneric Classification.**

In: *Taxon* 59 (1), p. 83–92. DOI: 10.1002/tax.591009.

## Menispermaceae

- AHMED, P. M.; VERMA, V.; QAZI, P. H.; GANAIE, M. M.; BAKSHI, P. K.; QAZI, G. N. (2005):  
**Molecular Phylogeny in Indian *Tinospora* Species by DNA based molecular Markers.**  
In: Plant Systematics and Evolution 256 (1-4), p. 75–87. DOI: 10.1007/s00606-004-0293-1.
- HOOT, SARA B.; ZAUTKE, HERBERT; HARRIS, DAVID J.; CRANE, PETER R.; NEVES, SUSANA P. (2009):  
**Phylogenetic Patterns in Menispermaceae based on multiple Chloroplast Sequence Data.**  
In: Systematic Botany 34 (1), p. 44–56. DOI: 10.1600/036364409787602339.
- JACQUES, FRÉDÉRIC M.B.; BERTOLINO, P. (2008):  
**Molecular and morphological Phylogeny of Menispermaceae (Ranunculales).**  
In: Plant Systematics and Evolution 274 (1-2), p. 83–97. DOI: 10.1007/s00606-008-0038-7.
- ORTIZ, ROSA DEL C.; KELLOGG, ELIZABETH A. (2007):  
**Molecular Phylogeny of the Moonseed Family (Menispermaceae): Implications for morphological Diversification.**  
In: American Journal of Botany 94 (8), p. 1425–1438.
- ORTIZ, ROSA DEL C.; WANG, WEI; JACQUES, FRÉDÉRIC M.B.; CHEN, ZHI-DUAN (2016):  
**Phylogeny and a revised tribal Classification of Menispermaceae (Moonseed Family) based on molecular and morphological Data.**  
In: Taxon 65 (6), p. 1288–1312. DOI: 10.12705/656.5.
- WANG, WEI; ORTIZ, ROSA DEL C.; JACQUES, FRÉDÉRIC M.B.; CHUNG, SHIH-WEN; LIU, YANG; XIANG, XIAO-GUO; CHEN, ZHI-DUAN (2017):  
**New Insights into the Phylogeny of Burasaieae (Menispermaceae) with the Recognition of a new Genus and Emphasis on the southern Taiwanese and mainland Chinese Disjunction.**  
In: Molecular Phylogenetics and Evolution 109, p. 11–20. DOI: 10.1016/j.ympev.2016.12.038.
- WANG, WEI; ORTIZ, ROSA DEL C.; JACQUES, FRÉDÉRIC M.B.; XIANG, XIAO-GUO; LI, HONG-LEI; LIN, LI ET AL. (2012):  
**Menispermaceae and the Diversification of tropical rainforests near the Cretaceous-Paleogene Boundary.**  
In: the new Phytologist 195 (2), p. 470–478. DOI: 10.1111/j.1469-8137.2012.04158.x.
- WANG, WEI; WANG, HENG-CHANG; CHEN, ZHI-DUAN (2007):  
**Phylogeny and morphological Evolution of Tribe Menispermeae (Menispermaceae) inferred from Chloroplast and nuclear Sequences.**  
In: Perspectives in Plant Ecology, Evolution and Systematics 8 (3), p. 141–154. DOI: 10.1016/j.ppees.2006.12.001.
- WEFFERLING, KEIR M.; HOOT, SARA B.; NEVES, SUSANA P. (2013):  
**Phylogeny and Fruit Evolution in Menispermaceae.**  
In: American Journal of Botany 100 (5), p. 883–905. DOI: 10.3732/ajb.1200556.
- XIE, DAOTAO; HE, JIAYONG; HUANG, JIANMING; XIE, HUI; WANG, YAQIN; KANG, YUN ET AL. (2015):  
**Molecular Phylogeny of Chinese *Stephania* (Menispermaceae) and Reassessment of the Subgeneric and Sectional Classifications.**  
In: Australian Systematic Botany 28 (4), p. 246–255. DOI: 10.1071/SB14023.

## Menyanthaceae

- TIPPERY, NICHOLAS P.; LES, DONALD H. (2008):  
**Phylogenetic Analysis of the Internal Transcribed Spacer (ITS) Region in Menyanthaceae using predicted secondary Structure.**

In: *Molecular Phylogenetics and Evolution* 49 (2), p. 526–537. DOI: 10.1016/j.ympev.2008.07.019.

TIPPERY, NICHOLAS P.; LES, DONALD H. (2011):

**Phylogenetic Relationships and morphological Evolution in *Nymphoides* (Menyanthaceae).**

In: *Systematic Botany* 36 (4), p. 1101–1113. DOI: 10.1600/036364411X605092.

TIPPERY, NICHOLAS P.; LES, DONALD H.; PADGETT, DONALD J.; JACOBS, SURREY W.L. (2008):

**Generic Circumscription in Menyanthaceae: A phylogenetic Evaluation.**

In: *Systematic Botany* 33 (3), p. 598–612. DOI: 10.1600/036364408785679851.

## Metteniusaceae

GONZÁLEZ, FAVIO; BETANCUR, JULIO; MAURIN, OLIVIER; FREUDENSTEIN, JOHN V.; CHASE, MARK W. (2007):

**Metteniusaceae, an early-diverging Family in the Lamiid Clade.**

In: *Taxon* 56 (3), p. 795–800. DOI: 10.2307/25065861.

## Molluginaceae

BROCKINGTON, SAMUEL F.; DOS SANTOS, PATRICIA; GLOVER, BEVERLEY; CRAENE, LOUIS RONSE (2013):

**Androecial Evolution in Caryophyllales in light of a paraphyletic Molluginaceae.**

In: *American Journal of Botany* 100 (9), p. 1757–1778. DOI: 10.3732/ajb.1300083.

CHRISTIN, PASCAL-ANTOINE; SAGE, TAMMY L.; EDWARDS, ERIKA J.; OGBURN, R. MATTHEW; KHOSHRAVESH, ROXANNE; SAGE, ROWAN F. (2011):

**Complex evolutionary transitions and the Significance of C3-C4 intermediate Forms of Photosynthesis in Molluginaceae.**

In: *Evolution* 65 (3), p. 643–660. DOI: 10.1111/j.1558-5646.2010.01168.x.

THULIN, MATS; MOORE, ABIGAIL J.; EL-SEEDI, HESHAM; LARSSON, ANDERS; CHRISTIN, PASCAL-ANTOINE; EDWARDS, ERIKA J. (2016):

**Phylogeny and generic Delimitation in Molluginaceae, new Pigment Data in Caryophyllales, and the new Family Corbichoniaceae.**

In: *Taxon* 65 (4), p. 775–793. DOI: 10.12705/654.6.

## Monimiaceae

LIRIO, ELTON JOHN; PEIXOTO, ARIANE LUNA (2015):

**A new Species of *Mollinedia* (Monimiaceae, Mollinedioideae, Mollinedieae) from Atlantic Rainforest, Brazil.**

In: *Phytotaxa* 239 (1), p. 89. DOI: 10.11646/phytotaxa.239.1.9.

LIRIO, ELTON JOHN; PEIXOTO, ARIANE LUNA; SIQUEIRA, MARINEZ FERREIRA (2015):

**Taxonomy, conservation, geographic and potential Distribution of *Macrotorus* Perkins (Mollinedioideae, Monimiaceae), and a key to the Neotropical Genera of Monimiaceae.**

In: *Phytotaxa* 234 (3), p. 201. DOI: 10.11646/phytotaxa.234.3.1.

RENNER, SUSANNE S.; TAKEUCHI, WAYNE N. (2009):

**A Phylogeny and revised Circumscription for *Kairoa* (Monimiaceae), with the Description of a new Species from Papua New Guinea.**

In: *Harvard Papers in Botany* 14 (1), p. 71–81. DOI: 10.3100/025.014.0111.

## Monocotyledoneae

GIVNISH, THOMAS J.; PIRES, J. CHRIS; GRAHAM, SEAN W.; MCPHERSON, MARC; PRINCE, LINDA M.; PATTERSON, THOMAS B. ET AL. (2006):



**Phylogenetic Relationships of Monocots based on the Highly Informative Plastid Gene *ndhF*.**

In: *Aliso* 22 (1), p. 28–51. DOI: 10.5642/aliso.20062201.04.

**Montiaceae**

APPLEQUIST, WENDY L.; WAGNER, WARREN L.; ZIMMER, ELIZABETH A.; NEPOKROEFF, MOLLY (2006):

**Molecular Evidence Resolving the Systematic Position of *Hectorella* (Portulacaceae).**

In: *Systematic Botany* 31 (2), p. 310–319. DOI: 10.1600/036364406777585900.

MATTHEW OGBURN, R.; EDWARDS, ERIKA J. (2015):

**Life History Lability underlies rapid Climate Niche Evolution in the Angiosperm Clade Montiaceae.**

In: *Molecular Phylogenetics and Evolution* 92, p. 181–192. DOI: 10.1016/j.ympev.2015.06.006.

O'QUINN, ROBIN; HUFFORD, LARRY (2005):

**Molecular Systematics of Montieae (Portulacaceae): Implications for Taxonomy, Biogeography and Ecology.**

In: *Systematic Botany* 30 (2), p. 314–331.

STOUGHTON, THOMAS R.; JOLLES, DIANA D.; O'QUINN, ROBIN L. (2017):

**The Western Spring Beauties, *Claytonia lanceolata* (Montiaceae): A Review and Revised Taxonomy for California.**

In: *Systematic Botany* 42 (2), p. 283–300. DOI: 10.1600/036364417X695475.

**Moraceae**

BRUUN-LUND, SAM; CLEMENT, WENDY L.; KJELLBERG, FINN; RØNSTED, NINA (2017):

**First Plastid phylogenomic Study reveals potential cyto-nuclear Discordance in the evolutionary History of *Ficus* L. (Moraceae).**

In: *Molecular Phylogenetics and Evolution* 109, p. 93–104. DOI: 10.1016/j.ympev.2016.12.031.

CRUAUD, ASTRID; RØNSTED, NINA; CHANTARASUWAN, BHANUMAS; CHOU, LIEN SIANG; CLEMENT, WENDY L.; COULOUX, ARNAUD ET AL. (2012):

**An extreme Case of Plant-Insect Codiversification: Figs and Fig-pollinating Wasps.**

In: *Systematic Biology* 61 (6), p. 1029–1047. DOI: 10.1093/sysbio/sys068.

DATWYLER, SHANNON L.; WEIBLEN, GEORGE D. (2004):

**On the Origin of the Fig: phylogenetic Relationships of Moraceae from *Ndhf* Sequences.**

In: *American Journal of Botany* 91 (5), p. 767–777.

GARDNER, ELLIOT M.; SARRAF, PAYA; WILLIAMS, EVELYN W.; ZEREGA, NYREE J.C. (2017):

**Phylogeny and Biogeography of *Maclura* (Moraceae) and the Origin of an anachronistic fruit.**

In: *Molecular Phylogenetics and Evolution* 117, p. 49–59. DOI: 10.1016/j.ympev.2017.06.021.

LI, HONG-QING; WANG, SHUANG; CHEN, JI-YUN; GUI, PING (2012):

**Molecular Phylogeny of *Ficus* Section *Ficus* in China based on four DNA Regions.**

In: *Journal of Systematics and Evolution* 50 (5), p. 422–432. DOI: 10.1111/j.1759-6831.2012.00221.x.

MACHADO, ANDERSON FERREIRA PINTO; RØNSTED, NINA; BRUUN-LUND, SAM; PEREIRA, RODRIGO AUGUSTO SANTINELO; PAGANUCCI DE QUEIROZ, LUCIANO (2018):

**Atlantic forests to the all Americas: Biogeographical History and Divergence times of Neotropical *Ficus* (Moraceae).**

In: *Molecular Phylogenetics and Evolution* 122, p. 46–58. DOI: 10.1016/j.ympev.2018.01.015.

MISIEWICZ, T. M.; ZEREGA, NYREE J.C. (2012):

**Phylogeny, Biogeography and Character Evolution of *Dorstenia* (Moraceae).**

In: Edinburgh Journal of Botany 69 (3), p. 413–440. DOI: 10.1017/S096042861200025X.

RENOULT, JULIEN P.; KJELLBERG, FINN; GROUT, CINDERELLA; SANTONI, SYLVAIN; KHADARI, BOUCHAÏB (2009):

**Cyto-nuclear Discordance in the Phylogeny of *Ficus* Section *Galoglychia* and Host Shifts in Plant-pollinator associations.**

In: BMC Evolutionary Biology 9, p. 248. DOI: 10.1186/1471-2148-9-248.

RØNSTED, NINA; SALVO, GABRIELE; SAVOLAINEN, VINCENT (2007):

**Biogeographical and phylogenetic Origins of African Fig Species (*Ficus* Section *Galoglychia*).**

In: Molecular Phylogenetics and Evolution 43 (1), p. 190–201. DOI: 10.1016/j.ympev.2006.12.010.

RØNSTED, NINA; WEIBLEN, GEORGE D.; SAVOLAINEN, VINCENT; COOK, JAMES M. (2008):

**Phylogeny, Biogeography, and Ecology of *Ficus* Section *Malvanthera* (Moraceae).**

In: Molecular Phylogenetics and Evolution 48 (1), p. 12–22. DOI: 10.1016/j.ympev.2008.04.005.

VIJAYAN, KUNJUPILLAI (2004):

**Genetic Relationships of Japanese and Indian mulberry (*Morus* spp.) Genotypes revealed by DNA Fingerprinting.**

In: Plant Systematics and Evolution 243 (3-4), p. 221–232. DOI: 10.1007/s00606-003-0078-y.

XU, LEI; HARRISON, RHETT D.; YANG, PEI; YANG, DA-RONG (2011):

**New Insight into the phylogenetic and biogeographic History of Genus *Ficus*: Vicariance played a relatively minor Role compared with ecological Opportunity and Dispersal.**

In: Journal of Systematics and Evolution 49 (6), p. 546–557. DOI: 10.1111/j.1759-6831.2011.00155.x.

YANG, LI-YUAN; MACHADO, CARLOS A.; DANG, XIAO-DONG; PENG, YAN-QIONG; YANG, DA-RONG; ZHANG, DA-YONG; LIAO, WAN-JIN (2015):

**The incidence and Pattern of Copollinator Diversification in dioecious and monoecious Figs.**

In: Evolution 69 (2), p. 294–304. DOI: 10.1111/evo.12584.

ZEREGA, NYREE J.C.; CLEMENT, WENDY L.; DATWYLER, SHANNON L.; WEIBLEN, GEORGE D. (2005):

**Biogeography and Divergence Times in the Mulberry Family (Moraceae).**

In: Molecular Phylogenetics and Evolution 37 (2), p. 402–416. DOI: 10.1016/j.ympev.2005.07.004.

ZEREGA, NYREE J.C.; NUR SUPARDI, M. N.; MOTLEY, TIMOTHY J. (2010):

**Phylogeny and Recircumscription of Artocarpeae (Moraceae) with a Focus on *Artocarpus*.**

In: Systematic Botany 35 (4), p. 766–782. DOI: 10.1600/036364410X539853.

ZEREGA, NYREE J.C.; RAGONE, DIANE; MOTLEY, TIMOTHY J. (2005):

**Systematics and Species limits of Breadfruit (*Artocarpus*, Moraceae).**

In: Systematic Botany 30 (3), p. 603–615.

## Morinaceae

BELL, C. (2003):

**Phylogeny and Biogeography of Morinaceae (Dipsacales) based on nuclear and Chloroplast DNA Sequences.**

In: Organisms Diversity and Evolution 3 (3), p. 227–237. DOI: 10.1078/1439-6092-00077.

## Musaceae

CHRISTELOVÁ, PAVLA; VALÁRIK, MIROSLAV; HŘIBOVÁ, EVA; LANGHE, EDMOND DE; DOLEŽEL, JAROSLAV (2011):

**A multi Gene Sequence-based Phylogeny of the Musaceae (Banana) Family.**

In: BMC Evolutionary Biology 11, p. 103. DOI: 10.1186/1471-2148-11-103.

HAREESH, V. S.; JOE, A.; SREEJITH, P. E.; SABU, M. (2017):

***Musa markkuana* stat. nov. (Musaceae) - A reassessment of *Musa velutina* subsp. *markkuana*.**

In: Phytotaxa 303 (3), p. 279. DOI: 10.11646/phytotaxa.303.3.8.

LANGHE, EDMOND DE; PILLAY, M.; TENKOUANO, A.; SWENNEN, R. (2005):

**Integrating morphological and molecular Taxonomy in *Musa*: the African plantains (*Musa* spp. Aab Group).**

In: Plant Systematics and Evolution 255 (3-4), p. 225–236. DOI: 10.1007/s00606-005-0346-0.

LI, LIN-FENG; HÄKKINEN, MARKKU; YUAN, YONG-MING; HAO, GANG; GE, XUE-JUN (2010):

**Molecular Phylogeny and Systematics of the Banana Family (Musaceae) inferred from multiple nuclear and Chloroplast DNA Fragments, with a special Reference to the Genus *Musa*.**

In: Molecular Phylogenetics and Evolution 57 (1), p. 1–10. DOI: 10.1016/j.ympev.2010.06.021.

LIU, AI-ZHONG; KRESS, W. JOHN; LI, DE-ZHU (2010):

**Phylogenetic Analyses of the Banana Family (Musaceae) based on nuclear ribosomal (ITS) and Chloroplast (trnL-F) Evidence.**

In: Taxon 59 (1), p. 20–28.

## Myricaceae

HERBERT, JANE; CHASE, MARK W.; MÖLLER, MICHAEL; ABBOTT, RICHARD J. (2006):

**Nuclear and Plastid DNA Sequences confirm the Placement of the enigmatic *Canacomyrca monticola* in Myricaceae.**

In: Taxon 55 (2), p. 349–357. DOI: 10.2307/25065582.

HUGUET, VALÉRIE; GOUY, MANOLO; NORMAND, PHILIPPE; ZIMPFER, JEFF F.; FERNANDEZ, MARIA P. (2005):

**Molecular Phylogeny of Myricaceae: a Reexamination of host-symbiont Specificity.**

In: Molecular Phylogenetics and Evolution 34 (3), p. 557–568. DOI: 10.1016/j.ympev.2004.11.018.

LIU, LUXIAN; JIN, XIN-JIE; CHEN, NAN; LI, XIAN; LI, PAN; FU, CHENG-XIN (2015):

**Phylogeny of *Morella rubra* and its Relatives (Myricaceae) and Genetic Resources of Chinese Bayberry using RAD Sequencing.**

In: Public Library of Science One 10 (10), e0139840. DOI: 10.1371/journal.pone.0139840.

## Myristicaceae

SAUQUET, HERVÉ; DOYLE, JAMES A.; SCHARASCHKIN, TANYA; BORSCH, THOMAS; HILU, KHIDIR W.; CHATROU, LARS W.; LE THOMAS, ANNICK (2003):

**Phylogenetic Analysis of Magnoliales and Myristicaceae based on multiple Data Sets: Implications for Character Evolution.**

In: Botanical Journal of the Linnean Society 142 (2), p. 125–186. DOI: 10.1046/j.1095-8339.2003.00171.x.

SAUQUET, HERVÉ; LE THOMAS, ANNICK (2003):

**Pollen Diversity and Evolution in Myristicaceae (Magnoliales).**

In: International Journal of Plant Sciences 164 (4), p. 613–628.

SHEEJA, T. E.; SABEESH, C.; SHABNA, O. V.; SHALINI, R. S.; KRISHNAMOORTHY, B. (2013):

**Genetic Diversity Analysis of *Myristica* and related Genera using Rapd and ISSR Markers.**

In: Journal of Spices and Aromatic Crops 22 (1), p. 38–46.

**STEEVES, ROYCE ALLAN DAVID (2011):**

**An Intrageneric Study of morphological and Genetic Variation in the Neotropical Componeura and *Viola* (Myristiaceae).**

University of Guelph, Ontario, Canada. Guelph, Ontario, Canada.

## **Myrsinaceae**

**ANDERBERG, ARNE A. (1994):**

**Phylogeny and Subgeneric Classification of *Cyclamen* L. (Primulaceae).**

In: Kew Bulletin 49 (3), p. 455–467.

**ANDERBERG, ARNE A.; MANNS, ULRIKA; KÄLLERSJÖ, MARI (2007):**

**Phylogeny and Floral Evolution of the Lysimachieae (Ericales, Myrsinaceae): Evidence from ndhF Sequence Data.**

In: Willdenowia 37 (2), p. 407–421. DOI: 10.3372/wi.37.37202.

**ANDERBERG, ARNE A.; TRIFT, IDA; KLLERSJ, MARI (2000):**

**Phylogeny of *Cyclamen* L. (Primulaceae): Evidence from Morphology and Sequence Data from the internal transcribed Spacers of nuclear ribosomal DNA.**

In: Plant Systematics and Evolution 220 (3-4), p. 147–160. DOI: 10.1007/BF00985043.

**BONE, RUTH E.; STRIJK, JOERI S.; FRITSCH, PETER W.; BUERKI, SVEN; STRASBERG, DOMINIQUE; THÉBAUD, CHRISTOPHE; HODKINSON, TREVOR R. (2012):**

**Phylogenetic Inference of *Badula* (Primulaceae), a rare and threatened Genus endemic to the Mascarene Archipelago.**

In: Botanical Journal of the Linnean Society 169 (2), p. 284–296. DOI: 10.1111/j.1095-8339.2012.01221.x.

**DUBÉARNÈS, ANNE; JULIUS, AVELINAH; UTTERIDGE, TIMOTHY M.A. (2015):**

**A Synopsis of the Genus *Embelia* in Peninsular Malaysia and Singapore. Studies in Malaysian Myrsinaceae III.**

In: Kew Bulletin 70 (2), p. 1–33. DOI: 10.1007/S12225-015-9570-0.

**GIELLY, L.; DEBUSSCHE, M.; THOMPSON, J. D. (2001):**

**Geographic Isolation and Evolution of Mediterranean endemic *Cyclamen* : Insights from Chloroplast trnL (Uaa) Intron Sequence Variation.**

In: Plant Systematics and Evolution 230 (1-2), p. 75–88. DOI: 10.1007/s006060170005.

**HAO, GANG; YUAN, YONG-MING; HU, CHI-MING; GE, XUE-JUN; ZHAO, NAN-XIAN (2004):**

**Molecular Phylogeny of *Lysimachia* (Myrsinaceae) based on Chloroplast trnL-F and nuclear ribosomal ITS Sequences.**

In: Molecular Phylogenetics and Evolution 31 (1), p. 323–339. DOI: 10.1016/S1055-7903(03)00286-0.

**KÄLLERSJÖ, MARI; BERGQVIST, GULLEVI; ANDERBERG, ARNE A. (2000):**

**Generic Realignment in primuloid Families of the Ericales s.l.: a phylogenetic Analysis based on DNA Sequences from three Chloroplast Genes and Morphology.**

In: American Journal of Botany 87 (9), p. 1325–1341. DOI: 10.2307/2656725.

**LEMAIRE, BENNY; SMETS, ERIK; DESSEIN, STEVEN (2011):**

**Bacterial Leaf symbiosis in *Ardisia* (Myrsinoideae, Primulaceae): molecular Evidence for Host Specificity.**

In: Research in Microbiology 162 (5), p. 528–534. DOI: 10.1016/j.resmic.2011.04.003.

**MANNS, ULRIKA; ANDERBERG, ARNE A. (2005):**

**Molecular Phylogeny of *Anagallis* (Myrsinaceae) based on ITS, trnL-F, and ndhF Sequence Data.**

In: International Journal of Plant Sciences 166 (6), p. 1019–1028.

**MANN, ULRIKA; ANDERBERG, ARNE A. (2007):**

**Character Evolution in *Anagallis* (Myrsinaceae) inferred from morphological and molecular Data.**

In: Systematic Botany 32 (1), p. 166–179.

**MARTINS, L.; OBERPRIELER, CHRISTOPH; HELLWIG, FRANK H. (2003):**

**A phylogenetic Analysis of Primulaceae s.l. based on Internal Transcribed Spacer (ITS) DNA Sequence Data.**

In: Plant Systematics and Evolution 237 (1-2), p. 75–85. DOI: 10.1007/s00606-002-0258-1.

**OH, IL-CHAN; SCHÖNENBERGER, JÜRGEN; MOTLEY, TIMOTHY J.; MYRENÄS, MATTIAS; ANDERBERG, ARNE A. (2013):  
Phylogenetic Relationships among endemic Hawaiian *Lysimachia* (Ericales: Primulaceae): Insights from Nuclear and Chloroplast DNA Sequence Data.**

In: Pacific Science 67 (2), p. 237–251. DOI: 10.2984/67.2.7.

**PIPOLY, JOHN J.; RICKETSON, JON M. (1998):**

**A Revision of the Genus *Ardisia* Subgenus *Graphardisia* (Myrsinaceae).**

In: Sida, Contributions to Botany 18 (2), p. 433–472.

**RICKETSON, JON M.; PIPOLY, JOHN J. (2010):**

**A Synopsis of Neotropical *Stylogyne* (Myrsinaceae).**

In: Novon: A Journal for Botanical Nomenclature 20 (4), p. 437–447. DOI: 10.3417/2010027.

**SCHMID, MAURICE (2009):**

**Contribution à la Connaissance des Primulaceae (ex Myrsinaceae) de Nouvelle-Calédonie. II. Le genre *Rapanea* Aubl.**

In: Adansonia 31 (2), p. 341–395. DOI: 10.5252/a2009n2a8.

**SCHMID, MAURICE (2012):**

**Contribution à la connaissance des Primulaceae (ex Myrsinaceae) de Nouvelle-Calédonie. III. Les genres *Tapeinosperma* Hook.f. et *Mangenotiella* gen. nov.**

In: Adansonia 34 (2), p. 279–341. DOI: 10.5252/a2012n2a7.

**SLEUMER, H. (1988):**

**A Revision of the Genus *Ardisia* Sw. (Myrsinaceae) in New Guinea.**

In: Blumea 33, p. 115–140.

**SUNARNO, BAMBANG (2002):**

**New Species of *Labisia* (Myrsinaceae) from Sumatra.**

In: Reinwardtia 12 (1), p. 121–124.

**SUNARNO, BAMBANG (2005):**

**Revision of the Genus *Labisia* (Myrsinaceae).**

In: Blumea 50 (3), p. 579–597. DOI: 10.3767/000651905X622879.

**WANNTORP, LIVIA; RONSE DE CRAENE, LOUIS P.; PENG, CHING-I.; ANDERBERG, ARNE A. (2012):**

**Floral Ontogeny and Morphology of *Stimpsonia* and *Ardisiandra*, two aberrant Genera of the Primuloid Clade of Ericales.**

In: International Journal of Plant Sciences 173 (9), p. 1023–1035. DOI: 10.1086/667607.

**YESSON, CHRIS; CULHAM, ALASTAIR (2006):**

**A phyloclimatic Study of *Cyclamen*.**

In: BMC Evolutionary Biology 6, p. 72. DOI: 10.1186/1471-2148-6-72.

ZHANG, CAI-YUN; WANG, FENG-YING; YAN, HAI-FEI; HAO, GANG; HU, CHI-MING; GE, XUE-JUN (2012):  
**Testing DNA barcoding in closely related Groups of *Lysimachia* L. (Myrsinaceae).**  
In: molecular Ecology Resources 12 (1), p. 98–108. DOI: 10.1111/j.1755-0998.2011.03076.x.

## Myrtaceae

BAYLY, MICHAEL J.; LADIGES, PAULINE Y. (2007):

**Divergent paralogues of ribosomal DNA in Eucalypts (Myrtaceae).**

In: Molecular Phylogenetics and Evolution 44 (1), p. 346–356. DOI: 10.1016/j.ympev.2006.10.027.

BAYLY, MICHAEL J.; RIGAULT, PHILIPPE; SPOKEVICIUS, ANTANAS; LADIGES, PAULINE Y.; ADES, PETER K.; ANDERSON, CHARLOTTE ET AL. (2013):

**Chloroplast Genome Analysis of Australian Eucalypts - *Eucalyptus*, *Corymbia*, *Angophora*, *Allosyncarpia* and *Stockwellia* (Myrtaceae).**

In: Molecular Phylogenetics and Evolution 69 (3), p. 704–716. DOI: 10.1016/j.ympev.2013.07.006.

BAYLY, MICHAEL J.; UDOVICIC, FRANK; GIBBS, ADELE K.; PARRA-O., CARLOS; LADIGES, PAULINE Y. (2008):

**Ribosomal DNA pseudogenes are widespread in the Eucalypt Group (Myrtaceae): Implications for phylogenetic Analysis.**

In: Cladistics 24 (2), p. 131–146. DOI: 10.1111/j.1096-0031.2007.00175.x.

BIFFIN, ED; CRAVEN, LYN A.; CRISP, MICHAEL D.; GADEK, PAUL A. (2006):

**Molecular Systematics of *Syzygium* and allied Genera (Myrtaceae): Evidence from the Chloroplast Genome.**

In: Taxon 55 (1), p. 79–94. DOI: 10.2307/25065530.

BIFFIN, ED; HARRINGTON, MARK G.; CRISP, MICHAEL D.; CRAVEN, L. A.; GADEK, PAUL A. (2007):

**Structural Partitioning, paired-sites Models and Evolution of the ITS Transcript in *Syzygium* and Myrtaceae.**

In: Molecular Phylogenetics and Evolution 43 (1), p. 124–139. DOI: 10.1016/j.ympev.2006.08.013.

BOHTE, A.; DRINNAN, ANDREW N. (2005):

**Floral development and systematic Position of *Arillastrum*, *Allosyncarpia*, *Stockwellia* and *Eucalyptopsis* (Myrtaceae).**

In: Plant Systematics and Evolution 251 (1), p. 53–70. DOI: 10.1007/s00606-004-0161-z.

BROOKER, M. I.H. (2000):

**A new Classification of the Genus *Eucalyptus* L'Hér. (Myrtaceae).**

In: Australian Systematic Botany 13 (1), p. 79–148. DOI: 10.1071/SB98008.

BROOKER, M. I.H.; HOOPER, S.D. (2002):

**Taxonomy of Species deriving from the Publication of *Eucalyptus* subseries *Cornutae* (Myrtaceae).**

In: Nuytsia 14 (3), p. 325–360.

BROWN, GILLIAN K.; UDOVICIC, FRANK; LADIGES, PAULINE Y. (2001):

**Molecular Phylogeny and Biogeography of *Melaleuca*, *Callistemon* and related Genera (Myrtaceae).**

In: Australian Systematic Botany 14 (4), p. 565–585. DOI: 10.1071/SB00029.

COPELAND, LACHLAN M.; CRAVEN, LYN A.; BRUHL, JEREMY J. (2011):

**A taxonomic Review of *Homoranthus* (Myrtaceae: Chamelaucieae).**

In: Australian Systematic Botany 24 (6), p. 351–374. DOI: 10.1071/SB11015.

CRAVEN, L. A.; BIFFIN, ED (2010):

- An infrageneric Classification of *Syzygium* (Myrtaceae).**  
In: *Blumea* 55 (1), p. 94–99. DOI: 10.3767/000651910X499303.
- CRAVEN, LYN A.; EDWARDS, ROBERT D.; COWLEY, KIRSTEN J. (2014):**  
**New Combinations and names in *Melaleuca* (Myrtaceae).**  
In: *Taxon* 63 (3), p. 663–670. DOI: 10.12705/633.38.
- EDWARDS, ROBERT D.; CRAVEN, LYN A.; CRISP, MICHAEL D.; COOK, LYN G. (2010):**  
***Melaleuca* revisited: cpDNA and morphological Data confirm that *Melaleuca* L. (Myrtaceae) is not monophyletic.**  
In: *Taxon* 59 (3), p. 744–754. DOI: 10.1002/tax.593007.
- FLORES-RENTERÍA, LLUVIA; RYMER, PAUL D.; RIEGLER, MARKUS (2017):**  
**Unpacking boxes: Integration of molecular, morphological and ecological Approaches reveals extensive Patterns of reticulate Evolution in box Eucalypts.**  
In: *Molecular Phylogenetics and Evolution* 108, p. 70–87. DOI: 10.1016/j.ympev.2017.01.019.
- GIBBS, ADELE K.; UDOVICIC, FRANK; DRINNAN, ANDREW N.; LADIGES, PAULINE Y. (2009):**  
**Phylogeny and Classification of *Eucalyptus* Subgenus *Eudesmia* (Myrtaceae) based on nuclear ribosomal DNA, Chloroplast DNA and Morphology.**  
In: *Australian Systematic Botany* 22 (3), p. 158–179. DOI: 10.1071/SB08043.
- HARRINGTON, MARK G.; GADEK, PAUL A. (2004):**  
**Molecular Systematics of the *Acmena* alliance (Myrtaceae): phylogenetic Analyses and evolutionary Implications with Reference to Australian taxa.**  
In: *Australian Systematic Botany* 17 (1), p. 63–72. DOI: 10.1071/SB03009.
- HARRINGTON, MARK G.; JACKES, BETSY R.; BARRETT, MATTHEW D.; CRAVEN, LYN A.; BARRETT, RUSSELL L. (2012):**  
**Phylogenetic Revision of *Backhousieae* (Myrtaceae): Neogene Divergence, a revised Circumscription of *Backhousia* and two new Species.**  
In: *Australian Systematic Botany* 25 (6), p. 404–417. DOI: 10.1071/SB12015.
- JONES, REBECCA C.; NICOLLE, DEAN; STEANE, DOROTHY A.; VAILLANCOURT, RENÉ E.; POTTS, BRADLEY M. (2016):**  
**High density, Genome-wide Markers and intra-specific replication yield an unprecedented phylogenetic Reconstruction of a globally significant, speciose Lineage of *Eucalyptus*.**  
In: *Molecular Phylogenetics and Evolution* 105, p. 63–85. DOI: 10.1016/j.ympev.2016.08.009.
- LAM, N.; WILSON, PAUL G.; HESLEWOOD, MARGARET M.; QUINN, CHRISTOPHER J. (2002):**  
**A phylogenetic Analysis of the *Chamelaucium* alliance (Myrtaceae).**  
In: *Australian Systematic Botany* 15 (4), p. 535–543. DOI: 10.1071/SB01039.
- LANGE, PETER J.; SMISSSEN, ROB D.O.B.; WAGSTAFF, STEVEN J.; KEELING, D. JEANNETTE; MURRAY, B. G.; TOELKEN, H. R. (2010):**  
**A molecular Phylogeny and infrageneric Classification for *Kunzea* (Myrtaceae) inferred from rDNA ITS and ETS Sequences.**  
In: *Australian Systematic Botany* 23 (5), p. 309–319. DOI: 10.1071/SB10019.
- LUCAS, EVE J.; HARRIS, STEPHEN A.; MAZINE, FIORELLA FERNANDA; BELSHAM, STEPHEN R.; NIC LUGHADHA, EIMEAR M.; TELFORD, ANNIKA ET AL. (2007):**  
**Suprageneric Phylogenetics of Myrteae, the generically richest Tribe in Myrtaceae (Myrtales).**  
In: *Taxon* 56 (4), p. 1105–1128. DOI: 10.2307/25065906.

- LUCAS, EVE J.; MATSUMOTO, KAZUE; HARRIS, STEPHEN A.; NIC LUGHADHA, EIMEAR M.; BENARDINI, BENEDETTA; CHASE, MARK W. (2011):  
**Phylogenetics, Morphology, and Evolution of the large Genus *Myrcia* s.l. (Myrtaceae).**  
In: International Journal of Plant Sciences 172 (7), p. 915–934. DOI: 10.1086/660913.
- MAZINE, FIORELLA FERNANDA; SOUZA, VINICIUS CASTRO; SOBRAL, MARCOS; FOREST, FÉLIX; LUCAS, EVE J. (2014):  
**A preliminary phylogenetic Analysis of *Eugenia* (Myrtaceae: Myrteae), with a focus on Neotropical Species.**  
In: Kew Bulletin 69 (2), p. 9497. DOI: 10.1007/S12225-014-9497-X.
- MCKINNON, GAY E.; VAILLANCOURT, RENÉ E.; STEANE, DOROTHY A.; POTTS, BRADLEY M. (2008):  
**An AFLP marker approach to lower-level Systematics in *Eucalyptus* (Myrtaceae).**  
In: American Journal of Botany 95 (3), p. 368–380. DOI: 10.3732/ajb.95.3.368.
- MILLS, PENELOPE J.; COOK, LYN G. (2014):  
**Rapid chromosomal Evolution in a morphologically cryptic Radiation.**  
In: Molecular Phylogenetics and Evolution 77, p. 126–135. DOI: 10.1016/j.ympev.2014.03.015.
- MURILLO-A, JOSÉ; RUIZ-PONCE, EDUARDO; LANDRUM, LESLIE R.; STUESSY, TOD F.; BARFUSS, MICHAEL H. J. (2012):  
**Phylogenetic Relationships in *Myrceugenia* (Myrtaceae) based on Plastid and nuclear DNA Sequences.**  
In: Molecular Phylogenetics and Evolution 62 (2), p. 764–776. DOI: 10.1016/j.ympev.2011.11.021.
- MURILLO-A, JOSÉ; STUESSY, TOD F.; RUIZ, EDUARDO (2013):  
**Phylogenetic Relationships among *Myrceugenia*, *Blepharocalyx*, and *Luma* (Myrtaceae) based on paired-sites Models and the secondary Structures of ITS and ETS Sequences.**  
In: Plant Systematics and Evolution 299 (4), p. 713–729. DOI: 10.1007/s00606-012-0754-x.
- NICOLLE, DEAN; WHALEN, MOLLY A.; MACKAY, DUNCAN A. (2006):  
**Morphological Variation and phylogenetic Relationships within *Eucalyptus* series *Subulatae* (Myrtaceae) of southern Australia.**  
In: Australian Systematic Botany 19 (1), p. 59–86. DOI: 10.1071/SB04036.
- OCHIENG, JOEL W.; HENRY, ROBERT J.; BAVERSTOCK, PETER R.; STEANE, DOROTHY A.; SHEPHERD, MERVYN (2007):  
**Nuclear ribosomal pseudogenes resolve a corroborated Monophyly of the Eucalypt Genus *Corymbia* despite misleading Hypotheses at functional ITS Paralogs.**  
In: Molecular Phylogenetics and Evolution 44 (2), p. 752–764. DOI: 10.1016/j.ympev.2007.04.017.
- PARRA-O., CARLOS; BAYLY, MICHAEL J.; DRINNAN, ANDREW N.; UDOVICIC, FRANK; LADIGES, PAULINE Y. (2010):  
**Corrigendum to: Phylogeny, major Clades and infrageneric Classification of *Corymbia* (Myrtaceae), based on nuclear ribosomal DNA and Morphology.**  
In: Australian Systematic Botany 23 (2). DOI: 10.1071/SB09028\_CO.
- PARRA-O., CARLOS; BAYLY, MICHAEL J.; DRINNAN, ANDREW N.; UDOVICIC, FRANK; LADIGES, PAULINE Y. (2009):  
**Phylogeny, major Clades and infrageneric Classification of *Corymbia* (Myrtaceae), based on nuclear ribosomal DNA and Morphology.**  
In: Australian Systematic Botany 22 (5), p. 384–399. DOI: 10.1071/SB09028.
- PARRA-O., CARLOS; BAYLY, MICHAEL J.; UDOVICIC, FRANK; LADIGES, PAULINE Y. (2006):  
**Ets Sequences support the Monophyly of the Eucalypt Genus *Corymbia* (Myrtaceae).**  
In: Taxon 55 (3), p. 653–663. DOI: 10.2307/25065641.
- POKE, FIONA S.; MARTIN, DARREN P.; STEANE, DOROTHY A.; VAILLANCOURT, RENÉ E.; REID, JAMES B. (2006):



**The impact of intragenic recombination on phylogenetic Reconstruction at the Sectional level in *Eucalyptus* when using a single copy nuclear Gene (Cinnamoyl CoA Reductase).**

In: *Molecular Phylogenetics and Evolution* 39 (1), p. 160–170. DOI: 10.1016/j.ympev.2005.11.016.

**PROENÇA, CAROLYN E.B.; LUGHADHA, EIMEAR M. NIC; LUCAS, EVE J.; WOODGYER, ELIZABETH M. (2006): *Algrizea* (Myrteae, Myrtaceae): A new Genus from the Highlands of Brazil.**

In: *Systematic Botany* 31 (2), p. 320–326.

**RYE, BARBARA L. (2013):**

**A Revision of the south-western Australian Genus *Astartea* (Myrtaceae: Chamelaucieae).**

In: *Nuytsia* 23, p. 189–269.

**RYE, BARBARA L. (2015):**

**A Revision of the south-western Australian Genus *Babingtonia* (Myrtaceae: Chamelaucieae).**

In: *Nuytsia* 25, p. 219–250.

**RYE, BARBARA L. (2015):**

**Reinstatement of *Ericomyrtus* (Myrtaceae: Chamaelaucieae) with three new Combinations.**

In: *Nuytsia* 25, p. 131–143.

**RYE, BARBARA L.; TRUDGEN, MALCOLM E. (2012):**

**Seven new Combinations for Western Australian members of Myrtaceae Tribe Chamelaucieae.**

In: *Nuytsia* 22 (6), p. 393–398.

**SANTOS, MATHEUS FORTES; LUCAS, EVE J.; SANO, PAULO TAKEO; BUERKI, SVEN; STAGGEMEIER, VANESSA GRAZIELE; FOREST, FÉLIX (2017):**

**Biogeographical Patterns of *Myrcia* s.l. (Myrtaceae) and their correlation with geological and climatic History in the Neotropics.**

In: *Molecular Phylogenetics and Evolution* 108, p. 34–48. DOI: 10.1016/j.ympev.2017.01.012.

**SANTOS, MATHEUS FORTES; SANO, PAULO TAKEO; FOREST, FÉLIX; LUCAS, EVE J. (2016):**

**Phylogeny, Morphology and Circumscription of *Myrcia* Sect. *Sympodiomyrcia* (*Myrcia* s.l., Myrtaceae).**

In: *Taxon* 65 (4), p. 759–774. DOI: 10.12705/654.5.

**SNOW, NEIL (2009):**

***Kanakomyrtus* (Myrtaceae): A new Endemic Genus from New Caledonia with Linear Stigma Lobes and Baccate Fruits.**

In: *Systematic Botany* 34 (2), p. 330–344. DOI: 10.1600/036364409788606253.

**SNOW, NEIL; DAWSON, JOHN W.; CALLMANDER, MARTIN W.; GANDHI, KANCHI; MUNZINGER, JÉRÔME (2016):**

**New Species, new Combinations, and Lectotypifications in New Caledonian *Eugenia* L. (Myrtaceae).**

In: *Candollea* 71 (1), p. 67–81. DOI: 10.15553/c2016v711a9.

**SNOW, NEIL; MCFADDEN, JESSIE; EVANS, TIMOTHY M.; SALYWON SALYWON, ANDREW M.; WOJCIECHOWSKI, MARTIN F.; WILSON, PETER G. (2011):**

**Morphological and molecular Evidence of Polyphyly in *Rhodomyrtus* (Myrtaceae: Myrteae).**

- In: Systematic Botany 36 (2), p. 390–404. DOI: 10.1600/036364411X569570.
- SOBRAL, MARCOS; COSTA, IDIMÁ G.; SOUZA, MARCELO C.; ZORZANELLI, JOAO PAULO F. (2017):  
Five new Species and one new Combination in Brazilian Myrtaceae.**  
In: Phytotaxa 307 (4), p. 233. DOI: 10.11646/phytotaxa.307.4.1.
- SOH, WUU KUANG; PARNELL, JOHN A.N. (2011):  
Comparative Leaf Anatomy and Phylogeny of *Syzygium* Gaertn.**  
In: Plant Systematics and Evolution 297 (1-2), p. 1–32. DOI: 10.1007/s00606-011-0495-2.
- STAGGEMEIER, VANESSA GRAZIELE; LUCAS, EVE J. (2014):  
Morphological diagnosis of a new Species in *Myrcia* sensu lato (Myrtaceae) from  
Bahia, Brazil, with molecular highlights.**  
In: Phytotaxa 181 (4), p. 229. DOI: 10.11646/phytotaxa.181.4.3.
- STEANE, DOROTHY A.; MCKINNON, GAY E.; VAILLANCOURT, RENÉ E.; POTTS, BRADLEY M. (1999):  
ITS Sequence Data resolve higher level Relationships among the Eucalypts.**  
In: Molecular Phylogenetics and Evolution 12 (2), p. 215–223. DOI: 10.1006/mpev.1999.0612.
- STEANE, DOROTHY A.; NICOLLE, DEAN; MCKINNON, GAY E.; VAILLANCOURT, RENÉ E.; POTTS, BRADLEY M. (2002):  
Higher-level Relationships among the Eucalypts are resolved by ITS-sequence Data.**  
In: Australian Systematic Botany 15 (1), p. 49–62. DOI: 10.1071/SB00039.
- STEANE, DOROTHY A.; NICOLLE, DEAN; POTTS, BRADLEY M. (2007):  
Phylogenetic Positioning of anomalous Eucalypts by using ITS Sequence Data.**  
In: Australian Systematic Botany 20 (5), p. 402–408. DOI: 10.1071/SB07013.
- STEANE, DOROTHY A.; NICOLLE, DEAN; SANSALONI, CAROLINA P.; PETROLI, CÉSAR D.; CARLING, JASON; KILIAN, ANDRZEJ  
ET AL. (2011):  
Population genetic Analysis and Phylogeny Reconstruction in *Eucalyptus* (Myrtaceae)  
using high-throughput, Genome-wide Genotyping.**  
In: Molecular Phylogenetics and Evolution 59 (1), p. 206–224. DOI: 10.1016/j.ympev.2011.02.003.
- THORNHILL, ANDREW H.; HO, SIMON Y.W.; KÜLHEIM, CARSTEN; CRISP, MICHAEL D. (2015):  
Interpreting the modern Distribution of Myrtaceae using a dated molecular  
Phylogeny.**  
In: Molecular Phylogenetics and Evolution 93, p. 29–43. DOI: 10.1016/j.ympev.2015.07.007.
- TRUDGEN, MALCOLM E.; RYE, BARBARA L. (2005):  
*Astus*, a new Western Australian Genus of Myrtaceae with heterocarpidic Fruits.**  
In: Nuytsia 15 (3), p. 495–512.
- TRUDGEN, MALCOLM E.; RYE, BARBARA L. (2010):  
*Enekbatus*, a new Western Australian Genus of Myrtaceae with a multi-locular  
indehiscent Fruit.**  
In: Nuytsia 20, p. 229–259.
- UDOVICIC, FRANK; LADIGES, PAULINE Y. (2000):  
Informativeness of Nuclear and Chloroplast DNA Regions and the Phylogeny of the  
Eucalypts and related Genera (Myrtaceae).**  
In: Kew Bulletin 55 (3), p. 633–645.
- UDOVICIC, FRANK; SPENCER, ROGER D. (2012):  
New Combinations in *Callistemon* (Myrtaceae).**  
In: Muellera 30 (1), p. 23–25.
- VAN DER MERWE, MARLIEN M.; VAN WYK, ABRAHAM E.; BOTHA, A. M. (2005):**

**Molecular phylogenetic Analysis of *Eugenia* L. (Myrtaceae), with Emphasis on southern African Taxa.**

In: *Plant Systematics and Evolution* 251 (1), p. 21–34. DOI: 10.1007/s00606-004-0160-0.

VASCONCELOS, THAÍS N. C.; PROENÇA, CAROLYN E.B.; AHMAD, BERHAMAN; AGUILAR, DANIEL S.; AGUILAR, REINALDO; AMORIM, BRUNO P. ET AL. (2017):

**Myrteae Phylogeny, Calibration, Biogeography and Diversification Patterns: Increased Understanding in the most Species rich Tribe of Myrtaceae.**

In: *Molecular Phylogenetics and Evolution* 109, p. 113–137. DOI: 10.1016/j.ympev.2017.01.002.

WILSON, CHRISTINE E.; FOREST, FÉLIX; DEVEY, DION S.; LUCAS, EVE J. (2016):

**Phylogenetic Relationships in *Calyptanthus* (Myrtaceae) with Particular Emphasis on its Monophyly relative to *Myrcia* s. l.**

In: *Systematic Botany* 41 (2), p. 378–386. DOI: 10.1600/036364416X691786.

WILSON, PAUL G.; O'BRIEN, M. M.; HESLEWOOD, MARGARET M.; QUINN, CHRISTOPHER J. (2005):

**Relationships within Myrtaceae sensu lato based on a matK Phylogeny.**

In: *Plant Systematics and Evolution* 251 (1), p. 3–19. DOI: 10.1007/s00606-004-0162-y.

WILSON, PETER G.; HESLEWOOD, MARGARET M. (2014):

**An expanded phylogenetic Analysis of *Sannantha* (Myrtaceae) and Description of a new Species.**

In: *Australian Systematic Botany* 27 (1), p. 78–84. DOI: 10.1071/SB14011.

WILSON, PETER G.; HESLEWOOD, MARGARET M. (2016):

**Phylogenetic Position of *Meteoromyrtus* (Myrtaceae).**

In: *Telopea* 19, p. 45–55. DOI: 10.7751/telopea10389.

WILSON, PETER G.; HESLEWOOD, MARGARET M.; QUINN, CHRISTOPHER J. (2007):

**Re-evaluation of the Genus *Babingtonia* (Myrtaceae) in eastern Australia and New Caledonia.**

In: *Australian Systematic Botany* 20 (4), p. 302–318. DOI: 10.1071/SB06032.

WRIGHT, SHANE D.; KEELING, D. JEANNETTE; ASHTON, FERN G.; DAWSON, JOHN W.; GARDNER, RICHARD C. (2000):

**Phylogenetic Analyses of New Caledonian *Metrosideros* and *Carpolepis* (Myrtaceae) from nrDNA (ITS) Sequences.**

In: *Australian Systematic Botany* 13 (6), p. 919–926. DOI: 10.1071/SB00009.

## Myrtales

BERGER, BRENT A.; KRIEBEL, RICARDO; SPALINK, DANIEL; SYTSMA, KENNETH J. (2016):

**Divergence times, historical Biogeography, and shifts in Speciation Rates of Myrtales.**

In: *Molecular Phylogenetics and Evolution* 95, p. 116–136. DOI: 10.1016/j.ympev.2015.10.001.

VASCONCELOS, THAÍS N. C.; PROENÇA, CAROLYN E.B. (2015):

**Floral cost vs. Floral display: Insights from the megadiverse Myrtales suggest that energetically expensive Floral Parts are less phylogenetically constrained.**

In: *American Journal of Botany* 102 (6), p. 900–909. DOI: 10.3732/ajb.1400509.

## Nartheciaceae

FUSE, SHIZUKA; LEE, NAM SOOK; TAMURA, MINORU N. (2012):

**Biosystematic studies on the Family Nartheciaceae (Dioscoreales) I. phylogenetic Relationships, Character Evolution and taxonomic Re-examination.**

In: *Plant Systematics and Evolution* 298 (8), p. 1575–1584. DOI: 10.1007/s00606-012-0660-2.

ZHAO, YI-MIN; WANG, WEI; ZHANG, SHU-REN (2012):

## **Delimitation and Phylogeny of *Aletris* (Nartheciaceae) with Implications for Perianth Evolution.**

In: Journal of Systematics and Evolution 50 (2), p. 135–145. DOI: 10.1111/j.1759-6831.2011.00172.x.

## **Nelumbonaceae**

**XUE, JIAN-HUA; DONG, WEN-PAN; CHENG, TAO; ZHOU, SHI-LIANG (2012):**

### **Nelumbonaceae: Systematic Position and Species Diversification revealed by the complete Chloroplast Genome.**

In: Journal of Systematics and Evolution 50 (6), p. 477–487. DOI: 10.1111/j.1759-6831.2012.00224.x.

## **Nepenthaceae**

**ALAMSYAH, FIRMAN; ITO, MOTOMI (2013):**

### **Phylogenetic Analysis of Nepenthaceae, based on Internal Transcribed Spacer Nuclear Ribosomal DNA Sequences.**

In: Acta Phytotaxonomica Geobotanica 64 (3), p. 113–126.

**MEIMBERG, HARALD; HEUBL, GÜNTHER (2006):**

### **Introduction of a nuclear Marker for phylogenetic Analysis of Nepenthaceae.**

In: Plant Biology 8 (6), p. 831–840. DOI: 10.1055/s-2006-924676.

**MEIMBERG, HARALD; THALHAMMER, STEFAN; BRACHMANN, ANDREAS; HEUBL, GÜNTHER (2006):**

### **Comparative Analysis of a translocated Copy of the trnK Intron in carnivorous Family Nepenthaceae.**

In: Molecular Phylogenetics and Evolution 39 (2), p. 478–490. DOI: 10.1016/j.ympev.2005.11.023.

**MEIMBERG, HARALD; WISTUBA, A.; DITTRICH, P.; HEUBL, GÜNTHER (2001):**

### **Molecular Phylogeny of Nepenthaceae based on Cladistic Analysis of Plastid trnK Intron Sequence Data.**

In: Plant Biology 3 (2), p. 164–175. DOI: 10.1055/s-2001-12897.

## **Nitrariaceae**

**TEMIRBAYEVA, KAMSHAT; ZHANG, MING-LI (2015):**

### **Molecular phylogenetic and biogeographical Analysis of *Nitraria* based on nuclear and Chloroplast DNA Sequences.**

In: Plant Systematics and Evolution 301 (7), p. 1897–1906. DOI: 10.1007/s00606-015-1202-5.

## **Nothofagaceae**

**ACOSTA, M. CRISTINA; PREMOLI, ANDREA C. (2010):**

### **Evidence of Chloroplast capture in South American *Nothofagus* (Subgenus *Nothofagus*, Nothofagaceae).**

In: Molecular Phylogenetics and Evolution 54 (1), p. 235–242. DOI: 10.1016/j.ympev.2009.08.008.

**HEENAN, PETER B.; SMISSEN, ROB D.O.B. (2013):**

### **Revised Circumscription of *Nothofagus* and Recognition of the segregate Genera *Fuscospora*, *Lophozonia*, and *Trisyngyne* (Nothofagaceae).**

In: Phytotaxa 146 (1), p. 1. DOI: 10.11646/phytotaxa.146.1.1.

**SAUQUET, HERVÉ; HO, SIMON Y.W.; GANDOLFO, MARIA A.; JORDAN, GREGORY J.; WILF, PETER; CANTRILL, DAVID J. ET AL. (2012):**

### **Testing the impact of calibration on molecular Divergence times using a fossil-rich Group: the case of *Nothofagus* (Fagales).**

In: Systematic Biology 61 (2), p. 289–313. DOI: 10.1093/sysbio/syr116.

SMISSEN, ROB D.O.B.; RICHARDSON, P. J.; MORSE, C. W.; HEENAN, PETER B. (2014):

**Relationships, Gene flow and Species boundaries among New Zealand *Fuscospora* (Nothofagaceae: Southern Beech).**

In: New Zealand Journal of Botany 52 (4), p. 389–406. DOI: 10.1080/0028825X.2014.960946.

## Nyctaginaceae

DOUGLAS, NORMAN A.; MANOS, PAUL P. (2007):

**Molecular Phylogeny of Nyctaginaceae: Taxonomy, Biogeography, and Characters associated with a Radiation of xerophytic Genera in North America.**

In: American Journal of Botany 94 (5), p. 856–872. DOI: 10.3732/ajb.94.5.856.

DOUGLAS, NORMAN A.; SPELLENBERG, RICHARD (2010):

**A new tribal Classification of Nyctaginaceae.**

In: Taxon 59 (3), p. 905–910.

HERNÁNDEZ-LEDESMA, PATRICIA; OLVERA, HILDA FLORES; OCHOTERENA, HELGA (2010):

**Cladistic Analysis and taxonomic Synopsis of *Anulocaulis* (Nyctaginaceae) based on morphological Data.**

In: Systematic Botany 35 (4), p. 858–876. DOI: 10.1600/036364410X539916.

LEVIN, RACHEL A. (2000):

**Phylogenetic Relationships within Nyctaginaceae Tribe Nyctagineae: Evidence from Nuclear and Chloroplast Genomes.**

In: Systematic Botany 25 (4), p. 738. DOI: 10.2307/2666731.

LEVIN, RACHEL A.; MCDADE, LUCINDA A.; RAGUSO, ROBERT A. (2003):

**The Systematic Utility of Floral and vegetative Fragrance in two Genera of Nyctaginaceae.**

In: Systematic Biology 52 (3), p. 334–351. DOI: 10.1080/10635150390196975.

STRUWIG, MADELEEN; KLAASSEN, ESMERALDA S.; KWEMBEYA, EZEKIEL G. (2015):

**Nyctaginaceae: A taxonomic Treatment for the Flora of Namibia.**

In: Phytotaxa 238 (2), p. 101. DOI: 10.11646/phytotaxa.238.2.1.

## Nymphaeaceae

BORSCH, THOMAS; HILU, KHIDIR W.; WIERSEMA, JOHN H.; LÖHNE, CORNELIA; BARTHLOTT, WILHELM; WILDE, VOLKER (2007):

**Phylogeny of *Nymphaea* (Nymphaeaceae): Evidence from Substitutions and Microstructural Changes in the Chloroplast trnT-trnF Region.**

In: International Journal of Plant Sciences 168 (5), p. 639–671.

BORSCH, THOMAS; LÖHNE, CORNELIA; MBAYE, MAME SAMBA; WIERSEMA, JOHN H. (2011):

**Towards a complete Species Tree of *Nymphaea*: shedding further Light on Subg. *Brachyceras* and its Relationships to the Australian water-lilies.**

In: Telopea 13 (1-2), p. 193–217.

BORSCH, THOMAS; WIERSEMA, JOHN H.; HELLQUIST, C. BARRE; LÖHNE, CORNELIA; GOVERS, KIM (2014):

**Speciation in North American water lilies: Evidence for the hybrid Origin of the newly discovered Canadian endemic *Nymphaea loriana* sp. nov. (Nymphaeaceae) in a past Contact Zone.**

In: Botany 92 (12), p. 867–882. DOI: 10.1139/cjb-2014-0060.

DKHAR, JEREMY; KUMARIA, SUMAN; RAO, SATYAWADA RAMA; TANDON, PRAMOD (2012):

**Sequence characteristics and phylogenetic Implications of the nrDNA internal transcribed Spacers (ITS) in the Genus *Nymphaea* with focus on some Indian Representatives.**

In: Plant Systematics and Evolution 298 (1), p. 93–108. DOI: 10.1007/s00606-011-0526-z.

**LÖHNE, CORNELIA; BORSCH, THOMAS; JACOBS, SURREY W.L.; HELLQUIST, C. BARRE; WIERSEMA, JOHN H. (2008): Nuclear and Plastid DNA Sequences reveal complex reticulate Patterns in Australian water-Lilies (*Nymphaea* Subgenus *Anecphya*, Nymphaeaceae).**

In: Australian Systematic Botany 21 (4), p. 229–250. DOI: 10.1071/SB07010.

**PADGETT, DONALD J.; LES, DONALD H.; CROW, GARRETT E. (1999):**

**Phylogenetic Relationships in *Nuphar* (Nymphaeaceae): Evidence from Morphology, Chloroplast DNA, and Nuclear Ribosomal DNA.**

In: American Journal of Botany 86 (9), p. 1316–1324.

**TAYLOR, DAVID WINSHIP (2008):**

**Phylogenetic Analysis of Cabombaceae and Nymphaeaceae based on vegetative and Leaf architectural Characters.**

In: Taxon 57 (4), p. 1082–1095. DOI: 10.1002/tax.574005.

## **Nymphaeales**

**BORSCH, THOMAS; LÖHNE, CORNELIA; WIERSEMA, JOHN H. (2008):**

**Phylogeny and evolutionary Patterns in Nymphaeales: integrating genes, Genomes and Morphology.**

In: Taxon 57 (4), p. 1052–1081. DOI: 10.1002/tax.574004.

**LÖHNE, CORNELIA; BORSCH, THOMAS; WIERSEMA, JOHN H. (2007):**

**Phylogenetic Analysis of Nymphaeales using fast-evolving and noncoding Chloroplast Markers.**

In: Botanical Journal of the Linnean Society 154 (2), p. 141–163. DOI: 10.1111/j.1095-8339.2007.00659.x.

**YOO, MI-JEONG; BELL, CHARLES D.; SOLTIS, PAMELA S.; SOLTIS, DOUGLAS E. (2005):**

**Divergence Times and Historical Biogeography of Nymphaeales.**

In: Systematic Botany 30 (4), p. 693–704.

## Nyssaceae

WANG, NIAN; MILNE, RICHARD IAN; JACQUES, FRÉDÉRIC M.B.; SUN, BAO-LING; ZHANG, CHANG-QIN; YANG, JUN-BO (2012):

**Phylogeny and a revised Classification of the Chinese Species of *Nyssa* (Nyssaceae) based on morphological and molecular Data.**

In: *Taxon* 61 (2), p. 344–354.

XIANG, QIU-YUN; MOODY, MICHAEL L.; SOLTIS, DOUGLAS E.; FAN, CHUANZHU; SOLTIS, PAMELA P. (2002):

**Relationships within Cornales and Circumscription of Cornaceae - matK and rbcL Sequence Data and effects of outgroups and long Branches.**

In: *Molecular Phylogenetics and Evolution* 24 (1), p. 35–57. DOI: 10.1016/S1055-7903(02)00267-1.

ZHOU, WENBIN; JI, XIANG; OBATA, SHIHORI; PAIS, ANDREW; DONG, YIBO; PEET, ROBERT; XIANG, QIU-YUN JENNY (2018):

**Resolving Relationships and phylogeographic History of the *Nyssa sylvatica* complex using Data from RAD-seq and Species Distribution Modeling.**

In: *Molecular Phylogenetics and Evolution* 126, p. 1–16. DOI: 10.1016/j.ympev.2018.04.001.

## Ochnaceae

SASTRE, CLAUDE; OFFROY, BÉRANGÈRE (2016):

**Révision Nomenclaturale des Binômes du Genre Néotropical *Ouratea* Aublet (Ochnaceae) décrits par Van Tieghem.**

In: *Adansonia* 38 (1), p. 55–98. DOI: 10.5252/a2016n1a5.

SCHNEIDER, JULIO VALENTIN; BISSIENGOU, PULCHERIE; AMARAL, MARIA DO CARMO E.; TAHIR, ALI; FAY, MICHAEL F.; THINES, MARCO ET AL. (2014):

**Phylogenetics, ancestral state reconstruction, and a new infrafamilial Classification of the pantropical Ochnaceae (Medusagynaceae, Ochnaceae s.str., Quiinaceae) based on five DNA Regions.**

In: *Molecular Phylogenetics and Evolution* 78, p. 199–214. DOI: 10.1016/j.ympev.2014.05.018.

## Octoknemaceae

GOSLINE, GEORGE; MALÉCOT, VALÉRY (2011):

**A monograph of *Octoknema* (Octoknemaceae - Olacaceae s.l.).**

In: *Kew Bulletin* 66, p. 367–404.

## Olacaceae

MALÉCOT, VALÉRY; NICKRENT, DANIEL LEE (2008):

**Molecular phylogenetic Relationships of Olacaceae and related Santalales.**

In: *Systematic Botany* 33 (1), p. 97–106. DOI: 10.1600/036364408783887384.

## Oleaceae

BALDONI, L.; GUERRERO, C.; SOSSEY-ALLOUI, K.; ABBOTT, A. G.; ANGIOLILLO, A.; LUMARET R. (2002):

**Phylogenetic Relationships among *Olea* Species, based on Nucleotide Variation at a Non-Coding Chloroplast DNA Region.**

In: *Plant Biology* 4, p. 346–351.

BESNARD, GUILLAUME; RUBIO DE CASAS, RAFAEL; CHRISTIN, PASCAL-ANTOINE; VARGAS, PABLO (2009):

**Phylogenetics of *Olea* (Oleaceae) based on Plastid and nuclear ribosomal DNA Sequences: Tertiary climatic Shifts and Lineage differentiation Times.**

In: *Annals of Botany* 104 (1), p. 143–160. DOI: 10.1093/aob/mcp105.

GU, JING; SU, JUN-XIA; LIN, RUO-ZHU; LI, RUI-QI; XIAO, PEI-GEN (2011):

**Testing four proposed barcoding Markers for the Identification of Species within *Ligustrum* L. (Oleaceae).**

In: Journal of Systematics and Evolution 49 (3), p. 213–224. DOI: 10.1111/j.1759-6831.2011.00136.x.

**GUO, SHI-QUAN; XIONG, MIN; JI, CHUN-FENG; ZHANG, ZHI-RONG; LI, DE-ZHU; ZHANG, ZHI-YONG (2011):**

**Molecular phylogenetic Reconstruction of *Osmanthus* Lour. (Oleaceae) and related Genera based on three Chloroplast intergenic spacers.**

In: Plant Systematics and Evolution 294 (1-2), p. 57–64. DOI: 10.1007/s00606-011-0445-z.

**HINSINGER, DAMIEN D.; GAUDEUL, MYRIAM; COULOUX, ARNAUD; BOUSQUET, JEAN; FRASCARIA-LACOSTE, NATHALIE (2014):**

**The Phylogeography of Eurasian *Fraxinus* Species reveals ancient transcontinental Reticulation.**

In: Molecular Phylogenetics and Evolution 77, p. 223–237. DOI: 10.1016/j.ympev.2014.04.021.

**HONG-WA, CYNTHIA; BESNARD, GUILLAUME (2013):**

**Intricate Patterns of phylogenetic Relationships in the Olive Family as inferred from multi-locus Plastid and nuclear DNA Sequence Analyses: a close-up on *Chionanthus* and *Noronhia* (Oleaceae).**

In: Molecular Phylogenetics and Evolution 67 (2), p. 367–378. DOI: 10.1016/j.ympev.2013.02.003.

**JEANDROZ, SYLVAIN; ROY, ALICE; BOUSQUET, JEAN (1997):**

**Phylogeny and Phylogeography of the Circumpolar Genus *Fraxinus* (Oleaceae) based on Internal Transcribed Spacer Sequences of Nuclear Ribosomal DNA.**

In: Molecular Phylogenetics and Evolution 7 (2), p. 241–251.

**KIM, DONG-KAP; KIM, JOO-HWAN (2011):**

**Molecular Phylogeny of Tribe Forsythieae (Oleaceae) based on nuclear ribosomal DNA internal transcribed Spacers and Plastid DNA trnL-F and matK Gene Sequences.**

In: Journal of Plant Research 124 (3), p. 339–347. DOI: 10.1007/s10265-010-0383-9.

**KIM, KI-JOONG (1999):**

**Molecular Phylogeny of *Forsythia* (Oleaceae) based on Chloroplast DNA Variation.**

In: Plant Systematics and Evolution 218, p. 113–123.

**KIM, KI-JOONG; JANSEN, ROBERT K. (1998):**

**A Chloroplast DNA Phylogeny of Lilacs (*Syringa*, Oleaceae): Plastome Groups show a strong Correlation with crossing Groups.**

In: American Journal of Botany 85 (9), p. 1338–1351.

**LOWRY, PORTER PRESCOTT; HONG-WA, CYNTHIA (Hg.) (2016):**

**A taxonomic Revision of the Genus *Noronhia* Stadtm. ex Thouars (Oleaceae) in Madagascar and the Comoro Islands.**

Genève: Conservatoire et jardin botaniques de la Ville de Genève (Boissiera, vol. 70).

**NESOM, GUY L. (2014):**

**Phylogeny of *Fraxinus* Sect. *Melioides* (Oleaceae): Review and an alternative Hypothesis.**

In: Phytoneuron 95, p. 1–9.

**WALLANDER, EVA (2008):**

**Systematics of *Fraxinus* (Oleaceae) and Evolution of Dioecy.**

In: Plant Systematics and Evolution 273 (1-2), p. 25–49. DOI: 10.1007/s00606-008-0005-3.



WALLANDER, EVA; ALBERT, VICTOR A. (2000):

**Phylogeny and Classification of Oleaceae based on Rps16 and TrnI-f Sequence Data.**

In: American Journal of Botany 87 (12), p. 1827–1841.

YUAN, WANG-JUN; ZHANG, WEI-RUI; HAN, YUAN-JI; DONG, MEI-FANG; SHANG, FU-DE (2010):

**Molecular Phylogeny of *Osmanthus* (Oleaceae) based on non-coding Chloroplast and nuclear ribosomal Internal Transcribed Spacer Regions.**

In: Journal of Systematics and Evolution 48 (6), p. 482–489. DOI: 10.1111/j.1759-6831.2010.00099.x.

## Oliniaceae

SEBOLA, R. J.; BALKWILL, KEVIN (2013):

**A monographic Study of the Oliniaceae.**

In: Kew Bulletin 68 (3), p. 419–456. DOI: 10.1007/S12225-013-9465-X.

## Onagraceae

BEDOYA, ANA M.; MADRIÑÁN, SANTIAGO (2015):

**Evolution of the aquatic habit in *Ludwigia* (Onagraceae): Morpho-anatomical adaptive Strategies in the Neotropics.**

In: Aquatic Botany 120, p. 352–362. DOI: 10.1016/j.aquabot.2014.10.005.

BERRY, PAUL E.; HAHN, WILLIAM J.; SYTSMA, KENNETH J.; HALL, JOCELYN C.; MAST, AUSTIN R. (2004):

**Phylogenetic Relationships and Biogeography of *Fuchsia* (Onagraceae) based on noncoding nuclear and Chloroplast DNA Data.**

In: American Journal of Botany 91 (4), p. 601–614. DOI: 10.3732/ajb.91.4.601.

FORD, V. S.; GOTTLIEB, L. D. (2003):

**Reassessment of phylogenetic Relationships in *Clarkia* Sect. *Sympherica*.**

In: American Journal of Botany 90 (2), p. 284–292. DOI: 10.3732/ajb.90.2.284.

FORD, V. S.; GOTTLIEB, L. D. (2007):

**Tribal Relationships within Onagraceae inferred from PgiC Sequences.**

In: Systematic Botany 32 (2), p. 348–356. DOI: 10.1600/036364407781179725.

GRÍMSSON, FRÍÐGEIR; ZETTER, REINHARD; LENG, QIN (2012):

**Diverse fossil Onagraceae Pollen from a Miocene Palynoflora of North-east China: early Steps in Resolving the Phytogeographic History of the Family.**

In: Plant Systematics and Evolution 298 (3), p. 671–687. DOI: 10.1007/s00606-011-0578-0.

HOGGARD, GLORIA D.; KORES, PAUL J.; MOLVRAY, MIA; HOGGARD, RONALD K. (2004):

**The Phylogeny of *Gaura* (Onagraceae) based on ITS, ETS, and trnL-F Sequence Data.**

In: American Journal of Botany 91 (1), p. 139–148. DOI: 10.3732/ajb.91.1.139.

HUNG, KUO-HSIANG; SCHAAL, BARBARA A.; HSU, TSAI-WEN; CHIANG, YU-CHUNG; PENG, CHING-I.; CHIANG, TZEN-YUH (2009):

**Phylogenetic Relationships of diploid and polyploid Species in *Ludwigia* Sect. *Isnardia* (Onagraceae) based on Chloroplast and nuclear DNAs.**

In: Taxon 58 (4), p. 1216–1226. DOI: 10.1002/tax.584013.

KRAKOS, KYRA N.; REECE, JOSHUA S.; RAVEN, PETER H. (2014):

**Molecular Phylogenetics and Reproductive Biology of *Oenothera* Section *Kneiffia* (Onagraceae).**

In: Systematic Botany 39 (2), p. 523–532. DOI: 10.1600/036364414X680744.

PENG, CHING-I.; SCHMIDT, CLIFFORD L.; HOCH, PETER C.; RAVEN, PETER H. (2005):

**Systematics and Evolution of *Ludwigia* Section *Dantia* (Onagraceae).**

In: *Annals of the Missouri Botanical Garden* 92 (3), p. 307–359.

**XIE, LEI; WAGNER, WARREN L.; REE, RICHARD H.; BERRY, PAUL E.; WEN, JUN (2009):**

**Molecular Phylogeny, Divergence time estimates, and historical Biogeography of *Circaea* (Onagraceae) in the Northern Hemisphere.**

In: *Molecular Phylogenetics and Evolution* 53 (3), p. 995–1009. DOI: 10.1016/j.ympev.2009.09.009.

## Ophioglossaceae

**DAUPHIN, BENJAMIN; VIEU, JULIEN; GRANT, JASON R. (2014):**

**Molecular Phylogenetics supports widespread cryptic Species in Moonworts (*Botrychium s.s.*, Ophioglossaceae).**

In: *American Journal of Botany* 101 (1), p. 128–140. DOI: 10.3732/ajb.1300154.

**HAUK, WARREN D.; PARKS, CLIFFORD R.; CHASE, MARK W. (2003):**

**Phylogenetic studies of Ophioglossaceae: Evidence from *rbcl* and *trnL-F* Plastid DNA Sequences and Morphology.**

In: *Molecular Phylogenetics and Evolution* 28 (1), p. 131–151. DOI: 10.1016/S1055-7903(03)00032-0.

**SMALL, RANDALL L.; LICKEY, EDGAR B.; SHAW, JOEY; HAUKE, WARREN D. (2005):**

**Amplification of noncoding Chloroplast DNA for phylogenetic studies in Lycophytes and Monilophytes with a comparative example of relative phylogenetic Utility from Ophioglossaceae.**

In: *Molecular Phylogenetics and Evolution* 36 (3), p. 509–522. DOI: 10.1016/j.ympev.2005.04.018.

**SUN, BYUNG-YUN; KIM, MOON HONG; KIM, CHUL HWAN; PARK, CHONG-WOOK (2001):**

***Mankyua* (Ophioglossaceae): a new Fern Genus from Cheju Island, Korea.**

In: *Taxon* 50 (4), p. 1019–1024.

**WILLIAMS, EVELYN W.; WALLER, DONALD M. (2012):**

**Phylogenetic Placement of Species within the Genus *Botrychium s.s.* (Ophioglossaceae) on the Basis of Plastid Sequences, amplified Fragment Length Polymorphisms, and flow Cytometry.**

In: *International Journal of Plant Sciences* 173 (5), p. 516–531. DOI: 10.1086/664711.

## Opiliaceae

**LE, CHI-TOAN; LIU, BING; BARRETT, RUSSELL L.; LU, LI-MIN; WEN, JUN; CHEN, ZHI-DUAN (2018):**

**Phylogeny and a new tribal Classification of Opiliaceae (Santalales) based on molecular and morphological Evidence.**

In: *Journal of Systematics and Evolution* 56 (1), p. 56–66. DOI: 10.1111/jse.12295.

**YANG, LIU; YANG, GUAN-SONG; MA, HAI-YING; WANG, YUE-HUA; SHEN, SHI-KANG (2018):**

**Phylogenetic Placement of *Yunnanopilium* (Opiliaceae) inferred from molecular and morphological Data.**

In: *Journal of Systematics and Evolution* 56 (1), p. 48–55. DOI: 10.1111/jse.12285.

## Orchidaceae

**ACETO, S.; CAPUTO, P.; COZZOLINO, SALVATORE; GAUDIO, L.; MORETTI, A. (1999):**

**Phylogeny and Evolution of *Orchis* and allied Genera based on ITS DNA Variation: morphological Gaps and molecular Continuity.**

In: *Molecular Phylogenetics and Evolution* 13 (1), p. 67–76. DOI: 10.1006/mpev.1999.0628.

**ADAMS, PETER B. (2011):**

**Systematics of Dendrobiinae (Orchidaceae), with special Reference to Australian Taxa.**

In: Botanical Journal of the Linnean Society 166 (2), p. 105–126. DOI: 10.1111/j.1095-8339.2011.01141.x.

**ALVAREZ-MOLINA, AÍDA; CAMERON, KENNETH M. (2009):**

**Molecular Phylogenetics of Prescottiinae s.l. and their close allies (Orchidaceae, Cranichideae) inferred from Plastid and nuclear ribosomal DNA Sequences.**

In: American Journal of Botany 96 (5), p. 1020–1040. DOI: 10.3732/ajb.0800219.

**ANDRIANANJAMANANTSOA, HERINANDRIANINA N.; ENGBERG, SHANNON; LOUIS, EDWARD E.; BROUILLET, LUC (2016):**

**Diversification of *Angraecum* (Orchidaceae, Vandeeae) in Madagascar: Revised Phylogeny reveals Species Accumulation through time rather than rapid Radiation.**

In: Public Library of Science One 11 (9), e0163194. DOI: 10.1371/journal.pone.0163194.

**ARÉVALO, RAFAEL; CAMERON, KENNETH M. (2013):**

**Molecular Phylogenetics of *Mormolyca* (Orchidaceae: Maxillariinae) based on combined molecular Data Sets.**

In: Lankesteriana 13 (1-2), p. 1–11. DOI: 10.15517/lank.v0i0.11528.

**AVERYANOV, LEONID V. (2009):**

***Hayata glandulifera* (Orchidaceae), new Genus and Species from Northern Vietnam.**

In: Taiwania 54 (4), p. 311–316.

**AVERYANOV, LEONID V.; KUZNETSOV, ANDREY N.; KUZNETSOVA, SVETLANA P. (2013):**

***Vietorchis furcata* (Orchidaceae, VietOrchidinae) - a new Species from Southern Vietnam.**

In: Taiwania 58 (4), p. 251–256.

**AZEVEDO, CECÍLIA OLIVEIRA DE; VAN DEN BERG, CÁSSIO; BARROS, FÁBIO (2014):**

**A Revision of *Prescottia* (Orchidaceae: Orchidoideae, Cranichideae).**

In: Phytotaxa 178 (4), p. 233. DOI: 10.11646/phytotaxa.178.4.1.

**BARANOW, PRZEMYSŁAW; SZLACHETKO, DARIUSZ L. (2016):**

**The taxonomic Revision of *Sobralia* Ruiz & Pav. (Orchidaceae) in the Guyanas (Guyana, Suriname, French Guiana).**

In: Plant Systematics and Evolution 302 (3), p. 333–355. DOI: 10.1007/s00606-015-1266-2.

**BARANOW, PRZEMYSŁAW; SZLACHETKO, DARIUSZ L.; DUDEK, MAGDALENA (2014):**

**New Species of *Sobralia* Section *Abbreviatae* Brieger (Orchidaceae) from Colombia. A morphological and molecular Evidence.**

In: Plant Systematics and Evolution 300 (7), p. 1663–1670. DOI: 10.1007/s00606-014-0991-2.

**BARRETT, CRAIG F.; FREUDENSTEIN, JOHN V. (2008):**

**Molecular Evolution of *rbcl* in the mycoheterotrophic Coralroot Orchids (*Corallorhiza Gagnebin*, Orchidaceae).**

In: Molecular Phylogenetics and Evolution 47 (2), p. 665–679. DOI: 10.1016/j.ympev.2008.02.014.

**BARRETT, CRAIG F.; FREUDENSTEIN, JOHN V.; TAYLOR, D. LEE; KÖLJALG, URMAS (2010):**

**Rangewide Analysis of fungal associations in the fully mycoheterotrophic *Corallorhiza striata* complex (Orchidaceae) reveals extreme Specificity on ectomycorrhizal *Tomentella* (Thelephoraceae) across North America.**

In: American Journal of Botany 97 (4), p. 628–643. DOI: 10.3732/ajb.0900230.

**BATEMAN, RICHARD M.; HOLLINGSWORTH, PETER M.; PRESTON, JILLIAN; YI-BO, L. U.O.; PRIDGEON, ALEC M.; CHASE, MARK W. (2003):**

**Molecular Phylogenetics and Evolution of Orchidinae and selected Habenariinae (Orchidaceae).**

In: Botanical Journal of the Linnean Society 142 (1), p. 1–40. DOI: 10.1046/j.1095-8339.2003.00157.x.

**BATEMAN, RICHARD M.; RUDALL, PAULA J.; JAMES, KAREN E. (2006):**

**Phylogenetic Context, generic Affinities and evolutionary Origin of the enigmatic Balkan Orchid *Gymnadenia frivaldii* Hampe ex Griseb.**

In: Taxon 55 (1), p. 107–118. DOI: 10.2307/25065532.

**BATISTA, JOÃO AGUIAR NOGUEIRA; BORGES, KARINA S.; FARIA, MARINA W. F.; PROITE, KARINA; RAMALHO, ALINE JOSEPH; SALAZAR, GERARDO A.; VAN DEN BERG, CÁSSIO (2013):**

**Molecular Phylogenetics of the species-rich Genus *Habenaria* (Orchidaceae) in the New World based on nuclear and Plastid DNA Sequences.**

In: Molecular Phylogenetics and Evolution 67 (1), p. 95–109. DOI: 10.1016/j.ympev.2013.01.008.

**BATISTA, JOÃO AGUIAR NOGUEIRA; MENEGUZZO, THIAGO E.C.; SALAZAR, GERARDO A.; RAMALHO, ALINE JOSEPH; BEM BIANCHETTI, LUCIANO (2011):**

**Phylogenetic placement, taxonomic Revision and a new Species of *Nothostele* (Orchidaceae), an enigmatic Genus endemic to the Cerrado of Central Brazil.**

In: Botanical Journal of the Linnean Society 165 (4), p. 348–363. DOI: 10.1111/j.1095-8339.2011.01113.x.

**BATISTA, JOÃO AGUIAR NOGUEIRA; MOTA, A. CAROLINA M.N.A.; PROITE, KARINA; BIANCHETTI, LUCIANO DE BEM; ROMERO-GONZÁLEZ, GUSTAVO A.; HUERTA, HÉCTOR; SALAZAR, GERARDO A. (2014):**

**Molecular Phylogenetics of Neotropical *Cyanaeorchis* (Cymbidieae, Epidendroideae, Orchidaceae): geographical rather than morphological Similarities plus a new Species.**

In: Phytotaxa 156 (5), p. 251. DOI: 10.11646/phytotaxa.156.5.1.

**BELLSTEDT, DIRK U.; LINDER, HANS PETER; HARLEY, ERIC H. (2001):**

**Phylogenetic Relationships in *Disa* based on non-coding trnL-trnF Chloroplast Sequences: Evidence of numerous repeat Regions.**

In: American Journal of Botany 88 (11), p. 2088–2100. DOI: 10.2307/3558434.

**BELLUSCI, F.; PELLEGRINO, G.; PALERMO, A. M.; MUSACCHIO, A. (2008):**

**Phylogenetic Relationships in the Orchid Genus *Serapias* L. based on noncoding Regions of the Chloroplast Genome.**

In: Molecular Phylogenetics and Evolution 47 (3), p. 986–991. DOI: 10.1016/j.ympev.2008.03.019.

**BERNARDOS, SONIA; SANTOS, MARÍA A.; TYTECA, DANIEL; AMICH, FRANCISCO (2006):**

**Phylogenetic Relationships of Mediterranean Neottieae and Orchideae (Orchidaceae) inferred from nuclear ribosomal ITS Sequences.**

In: Acta Botanica Gallica 153 (2), p. 153–165. DOI: 10.1080/12538078.2006.10515534.

**BLANCO, MARIO A.; CARNEVALI, GERMÁN; WITTEN, W. MARK; SINGER, RODRIGO B.; KOEHLER, SAMANTHA; WILLIAMS, NORRIS H. ET AL. (2011):**

**Generic Realignments in Maxillariinae (Orchidaceae).**

In: Lankesteriana 7 (3), p. 515–537. DOI: 10.15517/lank.v0i0.7935.

**BOGARÍN, DIEGO; KARREMANS, ADAM P.; RINCÓN, RAFAEL; GRAVENDEEL, BARBARA (2013):**

**A new *Specklinia* (Orchidaceae: Pleurothallidinae) from Costa Rica and Panama.**

In: Phytotaxa 115 (2), p. 31. DOI: 10.11646/phytotaxa.115.2.1.

**BONE, RUTH E.; CRIBB, PHILLIP J.; BUERKI, SVEN (2015):**

**Phylogenetics of Eulophiinae (Orchidaceae: Epidendroideae): evolutionary Patterns and Implications for generic Delimitation.**

- In: *Botanical Journal of the Linnean Society* 179 (1), p. 43–56. DOI: 10.1111/boj.12299.
- BORBA, EDUARDO L.; SALAZAR, GERARDO A.; MAZZONI-VIVEIROS, SOLANGE; BATISTA, JOÃO AGUIAR NOGUEIRA (2014):  
Phylogenetic Position and Floral Morphology of the Brazilian endemic, monospecific  
Genus *Cotylolabium* : a sister Group for the remaining Spiranthinae (Orchidaceae).**  
In: *Botanical Journal of the Linnean Society* 175 (1), p. 29–46. DOI: 10.1111/boj.12136.
- BOUETARD, ANTHONY; LEFEUVRE, PIERRE; GIGANT, RODOLPHE; BORY, SÉVERINE; PIGNAL, MARC; BESSE, PASCALE;  
GRISONI, MICHEL (2010):  
Evidence of transoceanic Dispersion of the Genus *Vanilla* based on Plastid DNA  
phylogenetic Analysis.**  
In: *Molecular Phylogenetics and Evolution* 55 (2), p. 621–630. DOI: 10.1016/j.ympev.2010.01.021.
- BREITKOPF, HENDRIK; ONSTEIN, RENSK E.; CAFASSO, DONATA; SCHLÜTER, PHILIPP M.; COZZOLINO, SALVATORE (2015):  
Multiple shifts to different pollinators fuelled rapid Diversification in sexually  
deceptive *Ophrys* Orchids.**  
In: *the new Phytologist* 207 (2), p. 377–389. DOI: 10.1111/nph.13219.
- BURKE, JACINTA M.; BAYLY, MICHAEL J.; ADAMS, PETER B.; LADIGES, PAULINE Y. (2008):  
Molecular phylogenetic Analysis of *Dendrobium* (Orchidaceae), with Emphasis on the  
Australian Section *Dendrocoryne*, and Implications for generic Classification.**  
In: *Australian Systematic Botany* 21 (1), p. 1–14. DOI: 10.1071/SB07038.
- BYTEBIER, BENNY; BELLSTEDT, DIRK U.; LINDER, HANS PETER (2007):  
A molecular Phylogeny for the large African Orchid Genus *Disa*.**  
In: *Molecular Phylogenetics and Evolution* 43 (1), p. 75–90. DOI: 10.1016/j.ympev.2006.08.014.
- BYTEBIER, BENNY; BELLSTEDT, DIRK U.; LINDER, HANS PETER (2008):  
A new Phylogeny-based Sectional Classification for the large African Orchid Genus  
*Disa*.**  
In: *Taxon* 57 (4), p. 1233–1251. DOI: 10.1002/tax.574015.
- CAMERON, KENNETH M. (2004):  
Utility of Plastid *psaB* Gene Sequences for investigating intrafamilial Relationships  
within Orchidaceae.**  
In: *Molecular Phylogenetics and Evolution* 31 (3), p. 1157–1180. DOI: 10.1016/j.ympev.2003.10.010.
- CAMERON, KENNETH M. (2005):  
Leave it to the leaves: a molecular phylogenetic Study of Malaxideae  
(Epidendroideae, Orchidaceae).**  
In: *American Journal of Botany* 92 (6), p. 1025–1032. DOI: 10.3732/ajb.92.6.1025.
- CAMERON, KENNETH M. (2009):  
On the Value of nuclear and mitochondrial Gene Sequences for Reconstructing the  
Phylogeny of Vanilloid Orchids (Vanilloideae, Orchidaceae).**  
In: *Annals of Botany* 104 (3), p. 377–385. DOI: 10.1093/aob/mcp024.
- CAMERON, KENNETH M.; CHASE, MARK W. (1999):  
Phylogenetic Relationships of Pogoniinae (Vanilloideae, Orchidaceae): An  
Herbaceous Example of the Eastern North America-Eastern Asia Phylogeographic  
Disjunction.**  
In: *Journal of Plant Research* 112 (3), p. 317–329. DOI: 10.1007/PL00013873.
- CARLSWARD, BARBARA S.; STERN, WILLIAM LOUIS (2009):  
Vegetative Anatomy and Systematics of Triphorinae (Orchidaceae).**

- In: *Botanical Journal of the Linnean Society* 159 (2), p. 203–210. DOI: 10.1111/j.1095-8339.2008.00930.x.
- CARLSWARD, BARBARA S.; WHITTEN, WILLIAM MARK; WILLIAMS, NORRIS H. (2003):  
**Molecular Phylogenetics of Neotropical Leafless Angraecinae (Orchidaceae):  
Reevaluation of Generic Concepts.**  
In: *International Journal of Plant Sciences* 164 (1), p. 43–51.
- CARLSWARD, BARBARA S.; WHITTEN, WILLIAM MARK; WILLIAMS, NORRIS H. (2006):  
**Molecular Phylogenetics of Vandeeae (Orchidaceae) and the Evolution of Leaflessness.**  
In: *American Journal of Botany* 93 (5), p. 770–786.
- CARNEVALI, GERMÁN; CETZAL, WILLIAM; WHITTEN, WILLIAM MARK (2012):  
***Cryptocentrum beckendorffii* (Orchidaceae: Maxillariinae), an extraordinary new  
Species from Andean Peru.**  
In: *Phytotaxa* 68, p. 45–51.
- CHASE, MARK W.; CAMERON, KENNETH M.; FREUDENSTEIN, JOHN V.; PRIDGEON, ALEC M.; SALAZAR, GERARDO A.; VAN  
DEN BERG, CÁSSIO; SCHUITEMAN, ANDRÉ (2015):  
**An updated Classification of Orchidaceae.**  
In: *Botanical Journal of the Linnean Society* 177 (2), p. 151–174. DOI: 10.1111/boj.12234.
- CHASE, MARK W.; WHITTEN, WILLIAM MARK (2011):  
**Further taxonomic Transfers in Oncidiinae (Orchidaceae).**  
In: *Phytotaxa* 20 (1), p. 26–32. DOI: 10.11646/phytotaxa.20.1.2.
- CHEMISQUY, MARIA AMELIA; MORRONE, OSVALDO (2010):  
**Phylogenetic Analysis of the Subtribe Chloraeinae (Orchidaceae): a preliminary  
Approach based on three Chloroplast Markers.**  
In: *Australian Systematic Botany* 23 (1), p. 38–46. DOI: 10.1071/SB09026.
- CHEMISQUY, MARIA AMELIA; MORRONE, OSVALDO (2012):  
**Molecular Phylogeny of *Gavilea* (Chloraeinae: Orchidaceae) using Plastid and nuclear  
Markers.**  
In: *Molecular Phylogenetics and Evolution* 62 (3), p. 889–897. DOI: 10.1016/j.ympev.2011.11.026.
- CHEMISQUY, MARIA AMELIA; PREVOSTI, FRANCISCO J.; MORRONE, OSVALDO (2009):  
**Seed Morphology in the Tribe Chloraeae (Orchidaceae): combining traditional and  
geometric morphometrics.**  
In: *Botanical Journal of the Linnean Society* 160 (2), p. 171–183. DOI: 10.1111/j.1095-8339.2009.00968.x.
- CHIRON, G. R.U.Y.; KARREMANS, ADAM P.; VAN DEN BERG, CÁSSIO (2016):  
**Nomenclatural Notes in the Pleurothallidinae (Orchidaceae): *Phloeophila*.**  
In: *Phytotaxa* 270 (1), p. 56. DOI: 10.11646/phytotaxa.270.1.6.
- CHIRON, GUY R.; GUIARD, JOSIANE; VAN DEN BERG, CÁSSIO (2012):  
**Phylogenetic Relationships in Brazilian *Pleurothallis* sensu lato (Pleurothallidinae,  
Orchidaceae): Evidence from nuclear ITS rDNA Sequences.**  
In: *Phytotaxa* 46, p. 34–58.
- CHIRON, GUY R.; OLIVEIRA, REYJANE PATRÍCIA; SANTOS, TARCISO M.; BELLVERT, FLORIAN; BERTRAND, CÉDRIC; VAN DEN  
BERG, CÁSSIO (2009):  
**Phylogeny and Evolution of *Baptistonia* (Orchidaceae, Oncidiinae) based on  
molecular Analyses, Morphology and Floral Oil Evidences.**  
In: *Plant Systematics and Evolution* 281 (1-4), p. 35–49. DOI: 10.1007/s00606-009-0181-9.
- CHOCHAI, ARAYA; LEITCH, ILIA J.; INGROUILLE, MARTIN J.; FAY, MICHAEL F. (2012):

- Molecular Phylogenetics of *Paphiopedilum* (Cypripedioideae; Orchidaceae) based on nuclear ribosomal ITS and Plastid Sequences.**  
In: Botanical Journal of the Linnean Society 170 (2), p. 176–196. DOI: 10.1111/j.1095-8339.2012.01293.x.
- CISTERNAS, MAURICIO A.; SALAZAR, GERARDO A.; VERDUGO, GABRIELA; NOVOA, PATRICIO; CALDERÓN, XIMENA; NEGRITTO, MARÍA A. (2012):**  
**Phylogenetic Analysis of Chloraeinae (Orchidaceae) based on Plastid and nuclear DNA Sequences.**  
In: Botanical Journal of the Linnean Society 168 (3), p. 258–277. DOI: 10.1111/j.1095-8339.2011.01200.x.
- CLEMENTS, MARK A. (2003):**  
**Molecular phylogenetic Systematics in the Dendrobiinae (Orchidaceae), with Emphasis on *Dendrobium* Sect. *Pedilonum*.**  
In: Telopea 10 (1), p. 247–298. DOI: 10.7751/telopea20035619.
- CLEMENTS, MARK A.; HOWARD, CHRISTOPHER G.; MILLER, JOSEPH T.H. (2015):**  
***Caladenia* revisited: Results of molecular phylogenetic Analyses of Caladeniinae Plastid and nuclear loci.**  
In: American Journal of Botany 102 (4), p. 581–597. DOI: 10.3732/ajb.1500021.
- CLEMENTS, MARK A.; TUPAC OTERO, J.; MILLER, JOSEPH T.H. (2011):**  
**Phylogenetic Relationships in Pterostylidinae (Cranichideae: Orchidaceae): combined Evidence from nuclear ribosomal and Plastid DNA Sequences.**  
In: Australian Journal of Botany 59 (2), p. 99–117. DOI: 10.1071/BT10190.
- COX, ANTONY V.; PRIDGEON, ALEC M.; ALBERT, VICTOR A.; CHASE, MARK W. (1997):**  
**Phylogenetics of the slipper Orchids (Cypripedioideae, Orchidaceae): Nuclear rDNA ITS Sequences.**  
In: Plant Systematics and Evolution 208 (3-4), p. 197–223. DOI: 10.1007/BF00985442.
- COZZOLINO, SALVATORE; WIDMER, ALEX (2005):**  
**The evolutionary basis of reproductive isolation in Mediterranean Orchids.**  
In: Taxon 54 (4), p. 977–985. DOI: 10.2307/25065482.
- CRIBB, PHILLIP J.; FISCHER, EBERHARD; KILLMANN, DOROTHEE (2010):**  
**A Revision of *Gastrodia* (Orchidaceae: Epidendroideae, Gastrodieae) in tropical Africa.**  
In: Kew Bulletin 65 (2), p. 315–321. DOI: 10.1007/s12225-010-9193-4.
- DENG, H. U.A.; ZHANG, GUO-QIANG; LIU, ZHONG-JIAN; WANG, Y. A.N. (2015):**  
**A new Species and a new Combination of *Phalaenopsis* (Orchidaceae: Epidendroideae: Aeridinae): Evidence from morphological and DNA Analysis.**  
In: Phytotaxa 238 (3), p. 243. DOI: 10.11646/phytotaxa.238.3.3.
- DEVEY, DION S.; BATEMAN, RICHARD M.; FAY, MICHAEL F.; HAWKINS, JULIE A. (2008):**  
**Friends or relatives? Phylogenetics and Species Delimitation in the controversial European Orchid Genus *Ophrys*.**  
In: Annals of Botany 101 (3), p. 385–402. DOI: 10.1093/aob/mcm299.
- DEVOS, NICOLAS; RASPÉ, OLIVIER; OH, SANG-HUN; TYTECA, DANIEL; JACQUEMART, ANNE-LAURE (2006):**  
**The Evolution of *Dactylorhiza* (Orchidaceae) allotetraploid Complex: Insights from nrDNA Sequences and cpDNA PCR-rflp Data.**  
In: Molecular Phylogenetics and Evolution 38 (3), p. 767–778. DOI: 10.1016/j.ympev.2005.11.013.
- DOUCETTE, ALFONSO; TIMYAN, JOEL; HENRYS, INGRID; CAMERON, KENNETH M. (2016):**

**A tiny new Species of *Specklinia* from Haiti's Parc National Naturel Macaya and new Combinations in *Acianthera* (Pleurothallidinae, Epidendreae, Epidendroideae, Orchidaceae).**

In: Phytotaxa 275 (3), p. 263. DOI: 10.11646/phytotaxa.275.3.4.

DRESSLER, ROBERT L.; WHITTEN, WILLIAM MARK; WILLIAMS, NORRIS H. (2004):

**Phylogenetic Relationships of *Scaphyglottis* and related Genera (Laeliinae: Orchidaceae) based on nrDNA ITS Sequence Data.**

In: Brittonia 56 (1), p. 58–66. DOI: 10.1663/0007-196X(2004)056[0058:PROSAR]2.0.CO;2.

DROISSART, VINCENT; SONKÉ, BONAVENTURE; NGUEMBOU K., CHARLEMAGNE; DJUIKOUO, MARIE-NOËL K.; PARMENTIER, INGRID; STÉVART, TARIQ (2009):

**Synopsis of the Genus *Chamaeangis* (Orchidaceae), including two new Taxa.**

In: Systematic Botany 34 (2), p. 285–296. DOI: 10.1600/036364409788606361.

ENDARA, LORENA A.; WILLIAMS, NORRIS H.; WHITTEN, WILLIAM MARK (2011):

**Filogenia molecular preliminar de *Scaphosepalum* (Orchidaceae: Pleurothallidinae).**

In: Lankesteriana 11 (3), p. 245–252.

FAN, JIE; QIN, HAI-NING; LI, DE-ZHU; JIN, XIAO-HUA (2009):

**Molecular Phylogeny and Biogeography of *Holcoglossum* (Orchidaceae: Aeridinae) based on nuclear ITS, and Chloroplast trnL-F and matK.**

In: Taxon 58 (3), p. 849–861. DOI: 10.1002/tax.583013.

FISCHER, GUNTER ALEXANDER; GRAVENDEEL, BARBARA; SIEDER, ANTON; ANDRIANTIANA, JACKY L.; HEISELMAYER, PAUL; CRIBB, PHILLIP J. ET AL. (2007):

**Evolution of Resupination in Malagasy Species of *Bulbophyllum* (Orchidaceae).**

In: Molecular Phylogenetics and Evolution 45 (1), p. 358–376. DOI: 10.1016/j.ympev.2007.06.023.

FRAGA, CLAUDIO N.; MENEGUZZO, THIAGO E.C.; SADDI, EDUARDO M. (2015):

**The true identity of *Serapias nitida*, a Species of *Buchtienia* (Orchidaceae) from Brazilian Atlantic Forest.**

In: Taxon 64 (2), p. 355–361. DOI: 10.12705/642.27.

FREUDENSTEIN, JOHN V.; CHASE, MARK W. (2015):

**Phylogenetic Relationships in Epidendroideae (Orchidaceae), one of the great Flowering Plant Radiations: progressive Specialization and Diversification.**

In: Annals of Botany 115 (4), p. 665–681. DOI: 10.1093/aob/mcu253.

FREUDENSTEIN, JOHN V.; SENYO, DIANA M. (2008):

**Relationships and Evolution of matK in a Group of leafless Orchids (*Corallorhiza* and *Corallorhizinae*; Orchidaceae: Epidendroideae).**

In: American Journal of Botany 95 (4), p. 498–505. DOI: 10.3732/ajb.95.4.498.

FREUDENSTEIN, JOHN V.; VAN DEN BERG, CÁSSIO; GOLDMAN, DOUGLAS H.; KORES, PAUL J.; MOLVRAY, MIA; CHASE, MARK W. (2004):

**An expanded Plastid DNA Phylogeny of Orchidaceae and Analysis of Jackknife Branch Support Strategy.**

In: American Journal of Botany 91 (1), p. 149–157. DOI: 10.3732/ajb.91.1.149.

GAMISCH, ALEXANDER; FISCHER, GUNTER ALEXANDER; COMES, HANS PETER (2016):

**Frequent but asymmetric Niche Shifts in *Bulbophyllum* Orchids support Environmental and climatic Instability in Madagascar over Quaternary Time Scales.**

In: BMC Evolutionary Biology 16, p. 14. DOI: 10.1186/s12862-016-0586-3.



- GAMISCH, ALEXANDER; FISCHER, GUNTER ALEXANDER; COMES, HANS PETER (2015):**  
**Multiple independent Origins of auto-Pollination in tropical Orchids (*Bulbophyllum*) in light of the Hypothesis of selfing as an evolutionary dead end.**  
 In: BMC Evolutionary Biology 15, p. 192. DOI: 10.1186/s12862-015-0471-5.
- GARCIA-CRUZ, JAVIER; SOSA, VICTORIA (2005):**  
**Phylogenetic Relationships and Character Evolution in *Govenia* (Orchidaceae).**  
 In: Canadian Journal of Botany 83 (10), p. 1329–1339. DOI: 10.1139/b05-098.
- GARDINER, LAUREN MARIA (2012):**  
**New Combinations in the Genus *Vanda* (Orchidaceae).**  
 In: Phytotaxa 61, p. 47–54.
- GARDINER, LAUREN MARIA; KOCYAN, ALEXANDER; MOTES, MARTIN; ROBERTS, DAVID L.; EMERSON, BRENT C. (2013):**  
**Molecular Phylogenetics of *Vanda* and related Genera (Orchidaceae).**  
 In: Botanical Journal of the Linnean Society 173 (4), p. 549–572. DOI: 10.1111/boj.12102.
- GOLDMAN, DOUGLAS H.; FREUDENSTEIN, JOHN V.; KORES, PAUL J.; MOLVRAY, MIA; JARRELL, DAVID C.; WHITTEN, WILLIAM MARK ET AL. (2001):**  
**Phylogenetics of Arethuseae (Orchidaceae) based on Plastid matK and rbcL Sequences.**  
 In: Systematic Botany 26 (3), p. 670–695.
- GOLDMAN, DOUGLAS H.; JANSEN, ROBERT K.; VAN DEN BERG, CÁSSIO; LEITCH, ILIA J.; FAY, MICHAEL F.; CHASE, MARK W. (2004):**  
**Molecular and cytological examination of *Calopogon* (Orchidaceae, Epidendroideae): Circumscription, Phylogeny, Polyploidy, and possible hybrid Speciation.**  
 In: American Journal of Botany 91 (5), p. 707–723. DOI: 10.3732/ajb.91.5.707.
- GÓRNIAK, MARCIN; PAUN, OVIDIU; CHASE, MARK W. (2010):**  
**Phylogenetic Relationships within Orchidaceae based on a low-copy nuclear coding Gene, XDH: Congruence with organellar and nuclear ribosomal DNA Results.**  
 In: Molecular Phylogenetics and Evolution 56 (2), p. 784–795. DOI: 10.1016/j.ympev.2010.03.003.
- GRAVENDEEL, BARBARA; CHASE, MARK W.; VOGEL, EDUARD F.; ROOS, MARCO C.; MES, TED H. M.; BACHMANN, KONRAD (2001):**  
**Molecular Phylogeny of *Coelogyne* (Epidendroideae; Orchidaceae) based on Plastid Rflps, matK, and nuclear ribosomal ITS Sequences: Evidence for Polyphyly.**  
 In: American Journal of Botany 88 (10), p. 1915–1927. DOI: 10.2307/3558367.
- GUSTAFSSON, A.; LOVISA S.; VEROLA, CHRISTIANO FRANCO; ANTONELLI, ALEXANDRE (2010):**  
**Reassessing the temporal Evolution of Orchids with new Fossils and a Bayesian relaxed Clock, with Implications for the Diversification of the rare South American Genus *Hoffmannseggella* (Orchidaceae: Epidendroideae).**  
 In: BMC Evolutionary Biology 10, p. 177. DOI: 10.1186/1471-2148-10-177.
- HEADS, MICHAEL (2008):**  
**Biological Disjunction along the West Caledonian fault, New Caledonia: a Synthesis of molecular Phylogenetics and Panbiogeography.**  
 In: Botanical Journal of the Linnean Society 158 (3), p. 470–488. DOI: 10.1111/j.1095-8339.2008.00866.x.
- HERMANS, JOHAN; ANDRIANTIANA, JACKY L.; SIEDER, ANTON; KIEHN, MICHAEL; CRIBB, PHILLIP J.; RAJAVELONA, LANDY; GARDINER, LAUREN MARIA (2017):**  
**New Species and nomenclatural Changes in *Cynorkis* (Orchidaceae: Orchidoideae) from Madagascar and the Mascarenes.**

In: Kew Bulletin 72 (3), p. 144. DOI: 10.1007/S12225-017-9715-4.

**HIDAYATA, TOPIK; WESTON, PETER H.; YUKAWA, TOMOHISA; ITO, MOTOMI; RICE, ROD (2012):**

**Phylogeny of Subtribe Aeridinae (Orchidaceae) inferred from DNA Sequences Data: Advanced Analyses including Australasian Genera.**

In: Jurnal Teknologi 59, p. 87–95.

**HILLS, HAROLD G. (2012):**

**Taxonomic Revision of *Dressleria* (Orchidaceae, Catasetinae).**

In: Phytoneuron 48, p. 1–28.

**HILLS, HAROLD G.; WEBER, MICHAEL H. (2012):**

***Dressleria morenoi* (Orchidaceae, Catasetinae): a new Species from Colombia.**

In: Phytoneuron 103, p. 1–5.

**HOPPER, STEPHEN D. (2009):**

**Taxonomic turmoil Down-under: recent Developments in Australian Orchid Systematics.**

In: Annals of Botany 104 (3), p. 447–455. DOI: 10.1093/aob/mcp090.

**HOPPER, STEPHEN D.; BROWN, ANDREW P. (2004):**

**Robert Brown's *Caladenia* revisited, including a Revision of its Sister Genera *Cyanicula*, *Ericksonella* and *Pheladenia* (Caladeniinae: Orchidaceae).**

In: Australian Systematic Botany 17 (2), p. 171–240. DOI: 10.1071/SB03002.

**HOPPER, STEPHEN D.; BROWN, ANDREW P. (2007):**

**A Revision of Australia' s hammer Orchids (*Drakaea*: Orchidaceae), with some field Data on species-specific sexually deceived Wasp Pollinators.**

In: Australian Systematic Botany 20 (3), p. 252–285. DOI: 10.1071/SB06033.

**HOSSEINI, SHAHLA; DADKHAH, KOUROSH; Go, RUSEA (2016):**

**Molecular Systematics of Genus *Bulbophyllum* (Orchidaceae) in Peninsular Malaysia based on combined nuclear and Plastid DNA Sequences.**

In: Biochemical Systematics and Ecology 65, p. 40–48. DOI: 10.1016/j.bse.2016.01.003.

**HSU, TIEN-CHUAN; CHUNG, SHIH-WEN (2008):**

***Oberonia segawae* (Orchidaceae): A new Orchid Species in Taiwan.**

In: Taiwania 53 (2), p. 165–169.

**INDA, LUIS A.; PIMENTEL, MANUEL; CHASE, MARK W. (2010):**

**Contribution of mitochondrial *cox1* Intron Sequences to the Phylogenetics of Tribe Orchideae (Orchidaceae): Do the Distribution and Sequence of this Intron in Orchids also tell us something about its Evolution?**

In: Taxon 59 (4), p. 1053–1064. DOI: 10.1002/tax.594006.

**INDA, LUIS A.; PIMENTEL, MANUEL; CHASE, MARK W. (2012):**

**Phylogenetics of Tribe Orchideae (Orchidaceae: Orchidoideae) based on combined DNA Matrices: Inferences regarding Timing of Diversification and Evolution of Pollination Syndromes.**

In: Annals of Botany 110 (1), p. 71–90. DOI: 10.1093/aob/mcs083.

**INDSTO, JAMES O.; WESTON, PETER H.; CLEMENTS, MARK A. (2009):**

**A molecular phylogenetic Analysis of *Diuris* (Orchidaceae) based on AFLP and ITS reveals three major Clades and a basal Species.**

In: Australian Systematic Botany 22 (1), p. 1–15. DOI: 10.1071/SB08029.

- JANES, JASMINE K.; DURETTO, MARCO F. (2010):  
**A new Classification for Subtribe Pterostylidinae (Orchidaceae), Reaffirming *Pterostylis* in the broad sense.**  
In: Australian Systematic Botany 23 (4), p. 260–269. DOI: 10.1071/SB09052.
- JANES, JASMINE K.; STEANE, DOROTHY A.; VAILLANCOURT, RENÉ E.; DURETTO, MARCO F. (2010):  
**A molecular Phylogeny of the Subtribe Pterostylidinae (Orchidaceae): resolving the taxonomic Confusion.**  
In: Australian Systematic Botany 23 (4), p. 248–259. DOI: 10.1071/SB10006.
- JERSÁKOVÁ, JANA; TRÁVNÍČEK, PAVEL; KUBÁTOVÁ, BARBORA; KREJČÍKOVÁ, JANA; URFUS, TOMÁŠ; LIU, ZHONG-JIAN ET AL. (2013):  
**Genome size Variation in Orchidaceae Subfamily Apostasioideae: filling the phylogenetic Gap.**  
In: Botanical Journal of the Linnean Society 172 (1), p. 95–105. DOI: 10.1111/boj.12027.
- JIN, WEI-TAO; JIN, XIAO-HUA; SCHUITEMAN, ANDRÉ; LI, DE-ZHU; XIANG, XIAO-GUO; HUANG, WEI-CHANG ET AL. (2014):  
**Molecular Systematics of Subtribe Orchidinae and Asian Taxa of Habenariinae (Orchideae, Orchidaceae) based on Plastid matK, rbcL and nuclear ITS.**  
In: Molecular Phylogenetics and Evolution 77, p. 41–53. DOI: 10.1016/j.ympev.2014.04.004.
- JIN, WEI-TAO; XIANG, XIAO-GUO; JIN, XIAO-HUA (2015):  
**Generic Delimitation of Orchidaceae from China: current Situation and Perspective.**  
In: Biodiversity Science 23 (2), p. 237–242. DOI: 10.17520/biods.2014268.
- JIN, XIAO-HUA; LI, DE-ZHU; XIANG, XIAO-GUO; LAI, YANG-JUN; SHI, XIAO-CHUN (2012):  
***Nujiangia* (Orchidaceae: Orchideae): A new Genus from the Himalayas.**  
In: Journal of Systematics and Evolution 50 (1), p. 64–71. DOI: 10.1111/j.1759-6831.2011.00167.x.
- KARREMANS, ADAM P. (2014):  
***Lankesteriana*, a new Genus in the Pleurothallidinae (Orchidaceae).**  
In: Lankesteriana 13 (3), p. 319–332.
- KARREMANS, ADAM P. (2015):  
**Nomenclatural Notes in the Pleurothallidinae (Orchidaceae): *Stelis*.**  
In: Phytotaxa 203 (3), p. 292. DOI: 10.11646/phytotaxa.203.3.9.
- KARREMANS, ADAM P.; ALBERTAZZI, FEDERICO J.; BAKKER, FREEK T.; BOGARÍN, DIEGO; EURLINGS, MARCEL C.M.; PRIDGEON, ALEC M. ET AL. (2016):  
**Phylogenetic reassessment of *Specklinia* and its allied Genera in the Pleurothallidinae (Orchidaceae).**  
In: Phytotaxa 272 (1), p. 1. DOI: 10.11646/phytotaxa.272.1.1.
- KARREMANS, ADAM P.; BAKKER, FREEK T.; PUPULIN, FRANCO; SOLANO-GÓMEZ, RODOLFO; SMULDERS, MARINUS J. M. (2013):  
**Phylogenetics of *Stelis* and closely related Genera (Orchidaceae: Pleurothallidinae).**  
In: Plant Systematics and Evolution 299 (1), p. 151–176. DOI: 10.1007/s00606-012-0712-7.
- KARREMANS, ADAM P.; BOGARÍN, DIEGO; PUPULIN, FRANCO; LUER, CARLYLE A.; GRAVENDEEL, BARBARA (2015):  
**The glandulous *Specklinia*: morphological Convergence versus phylogenetic Divergence.**  
In: Phytotaxa 218 (2), p. 101. DOI: 10.11646/phytotaxa.218.2.1.
- KARREMANS, ADAM P.; PUPULIN, FRANCO; GRAVENDEEL, BARBARA (2015):

***Specklinia dunstervillei*, a new Species long confused with *Specklinia endotrachys*  
(Orchidaceae: Pleurothallidinae).**

In: Public Library of Science One 10 (7), e0131971. DOI: 10.1371/journal.pone.0131971.

**KARREMANS, ADAM P.; RINCÓN-GONZÁLEZ, MILTON (2015):**

**Nomenclatural Notes in the Pleurothallidinae (Orchidaceae): *Apoda-prorepentia*.**

In: Phytotaxa 238 (2), p. 174. DOI: 10.11646/phytotaxa.238.2.5.

**KENNEDY, AARON H.; WATSON, LINDA E. (2010):**

**Species Delimitations and phylogenetic Relationships within the Fully Myco-heterotrophic *Hexalectris* (Orchidaceae).**

In: Systematic Botany 35 (1), p. 64–76.

**KITA, KOICHI; HANDA, TAKASHI; HIDAYATA, TOPIK; WESTON, PETER H.; YUKAWA, TOMOHISA; RICEF, ROD; ITO, MOTOMI (2005):**

**Molecular Phylogenetics of *Phalaenopsis* (Orchidaceae) Genera: Re-evaluation of Generic Concepts.**

In: Acta Phytotaxonomica Geobotanica 56 (2), p. 141–161.

**KOCYAN, ALEXANDER; QIU, Y.-L.; ENDRESS, PETER K.; CONTI, ELENA (2004):**

**A phylogenetic Analysis of Apostasioideae (Orchidaceae) based on ITS, trnL-F and matK Sequences.**

In: Plant Systematics and Evolution 247 (3-4), p. 203–213. DOI: 10.1007/s00606-004-0133-3.

**KOCYAN, ALEXANDER; SCHUITEMAN, ANDRÉ (2014):**

**New Combinations in Aeridinae (Orchidaceae).**

In: Phytotaxa 161 (1), p. 61. DOI: 10.11646/phytotaxa.161.1.3.

**KOCYAN, ALEXANDER; VOGEL, EDUARD F.; CONTI, ELENA; GRAVENDEEL, BARBARA (2008):**

**Molecular Phylogeny of *Aerides* (Orchidaceae) based on one nuclear and two Plastid Markers: a step forward in Understanding the Evolution of the Aeridinae.**

In: Molecular Phylogenetics and Evolution 48 (2), p. 422–443. DOI: 10.1016/j.ympev.2008.02.017.

**KOEHLER, SAMANTHA; CABRAL, JULIANO S.; WHITTEN, WILLIAM MARK; WILLIAMS, NORRIS H.; SINGER, RODRIGO B.; NEUBIG, KURT M. ET AL. (2008):**

**Molecular Phylogeny of the Neotropical Genus *Christensonella* (Orchidaceae, Maxillariinae): Species Delimitation and Insights into Chromosome Evolution.**

In: Annals of Botany 102 (4), p. 491–507. DOI: 10.1093/aob/mcn128.

**KOEHLER, SAMANTHA; WILLIAMS, NORRIS H.; WHITTEN, WILLIAM MARK; AMARAL, MARIA DO CARMO E. (2002):**

**Phylogeny of the *Bifrenaria* (Orchidaceae) Complex based on Morphology and Sequence Data from Nuclear rDNA Internal Transcribed Spacers (ITS) and Chloroplast trnL - trnF Region.**

In: International Journal of Plant Sciences 163 (6), p. 1055–1066. DOI: 10.1086/342035.

**KOLANOWSKA, MARTA; SZLACHETKO, DARIUSZ L. (2015):**

**Notes on Pachyphyllinae (Vandoideae, Orchidaceae) with a Description of a new Genus.**

In: Plant Systematics and Evolution 301 (1), p. 95–111. DOI: 10.1007/s00606-014-1057-1.

**KOLANOWSKA, MARTA; SZLACHETKO, DARIUSZ L. (2015):**

**Overview of *Cranichis* (Orchidaceae, Cranichidinae) and allied Genera with Notes on their Colombian Representatives.**

In: Plant Systematics and Evolution 301 (2), p. 709–724. DOI: 10.1007/s00606-014-1110-0.

- KOLANOWSKA, MARTA; SZLACHETKO, DARIUSZ L. (2016):**  
**Problems with generic Delimitation in the *Odontoglossum* complex (Orchidaceae, Oncidiinae) and an Attempt for a Solution.**  
In: *Plant Systematics and Evolution* 302 (2), p. 203–217. DOI: 10.1007/s00606-015-1254-6.
- KOLLMANN, LUDOVIC JEAN CHARLES (2010):**  
**New Combinations and Description of two new Species in *Pabstiella* Brieger & Senghas (Orchidaceae) from Brazil.**  
In: *Candollea* 65 (1), p. 95–100. DOI: 10.15553/c2010v651a8.
- KORES, PAUL J.; MOLVRAJ, MIA; WESTON, PETER H.; HOPPER, STEPHEN D.; BROWN, ANDREW P.; CAMERON, KENNETH M.; CHASE, MARK W. (2001):**  
**A phylogenetic Analysis of Diurideae (Orchidaceae) based on Plastid DNA Sequence Data.**  
In: *American Journal of Botany* 88 (10), p. 1903–1914. DOI: 10.2307/3558366.
- KRAS, MARTA; SZLACHETKO, DARIUSZ L. (2013):**  
**The Genus *Bilabrella* Lindl. (Orchidaceae, Habenariinae): General Characteristic and Research History of the Genus.**  
In: *Biodiversity: Research and Conservation* 32 (1), p. 9–24. DOI: 10.2478/biorc-2013-0012.
- LARSEN, MICHAEL W.; PETER, CRAIG I.; JOHNSON, STEVEN D.; OLESEN, JENS M. (2008):**  
**Comparative biology of Pollination Systems in the African-Malagasy Genus *Brownleea* (Brownleeinae: Orchidaceae).**  
In: *Botanical Journal of the Linnean Society* 156 (1), p. 65–78. DOI: 10.1111/j.1095-8339.2007.00725.x.
- LEOPARDI, CARLOS; CARNEVALI, GERMÁN; ROMERO-GONZÁLEZ, GUSTAVO A. (2012):**  
***Amoana* (Orchidaceae, Laeliinae), a new Genus and Species from Mexico.**  
In: *Phytotaxa* 65, p. 23–35.
- LEOPARDI, CARLOS; CUMANA, LUIS (2015):**  
**Listado de Especies de la Familia Orchidaceae para el Estado Sucre, Venezuela.**  
In: *Lankesteriana* 8 (3). DOI: 10.15517/lank.v8i3.18323.
- LEOPARDI-VERDE, CARLOS L.; CARNEVALI, GERMÁN; ROMERO-GONZÁLEZ, GUSTAVO A. (2017):**  
**A Phylogeny of the Genus *Encyclia* (Orchidaceae: Laeliinae), with Emphasis on the Species of the Northern Hemisphere.**  
In: *Journal of Systematics and Evolution* 55 (2), p. 110–123. DOI: 10.1111/jse.12225.
- LI, JI-HONG; LIU, ZHONG-JIAN; SALAZAR, GERARDO A.; BERNHARDT, PETER; PERNER, HOLGER; TOMOHISA, YUKAWA ET AL. (2011):**  
**Molecular Phylogeny of *Cypripedium* (Orchidaceae: Cypripedioideae) inferred from multiple nuclear and Chloroplast Regions.**  
In: *Molecular Phylogenetics and Evolution* 61 (2), p. 308–320. DOI: 10.1016/j.ympev.2011.06.006.
- LI, LIN; YAN, HAIFEI (2013):**  
**A remarkable new Species of *Liparis* (Orchidaceae) from China and its phylogenetic Implications.**  
In: *Public Library of Science One* 8 (11), e78112. DOI: 10.1371/journal.pone.0078112.
- LI, LIN; YAN, HAI-FEI; NIU, MIAO; TU, TIE-YAO; LI, SHI-JIN; XING, FU-WU (2014):**  
**Re-establishment of the Genus *Ania* Lindl. (Orchidaceae).**  
In: *Public Library of Science One* 9 (7), e103129. DOI: 10.1371/journal.pone.0103129.
- LI, LIN; YE, DE-PING; NIU, MIAO; YAN, HAI-FEI; WEN, TIE-LONG; LI, SHI-JIN (2015):**

- Thuniopsis*: A new Orchid Genus and Phylogeny of the Tribe Arethuseae (Orchidaceae).**  
In: Public Library of Science One 10 (8), e0132777. DOI: 10.1371/journal.pone.0132777.
- LI, MING-HE; ZHANG, GUO-QIANG; LAN, SI-REN; LIU, ZHONG-JIAN (2016):**  
**A molecular Phylogeny of Chinese Orchids.**  
In: Journal of Systematics and Evolution 54 (4), p. 349–362. DOI: 10.1111/jse.12187.
- LI, MING-HE; ZHANG, GUO-QIANG; LIU, ZHONG-JIAN; LAN, SI-REN (2014):**  
**Revision of *Hygrochilus* (Orchidaceae: Epidendroideae: Aeridinae) and a molecular phylogenetic Analysis.**  
In: Phytotaxa 159 (4), p. 256. DOI: 10.11646/phytotaxa.159.4.2.
- LIN, WEI-MIN; LING-LONG; HUANG, KUO; LIN, TSAN-PIAO (2006):**  
**Newly Discovered native Orchids of Taiwan.**  
In: Taiwania 51 (3), p. 162–169.
- LUER, CARLYLE A.; TOSCANO DE BRITO, A. L. V. (2011):**  
**Miscellaneous new Species and Combinations in the Pleurothallidinae (Orchidaceae) from Brazil and Argentina.**  
In: Harvard Papers in Botany 16 (2), p. 361–382. DOI: 10.3100/0.25.016.0207.
- LUO, JING; HOU, BEI-WEI; NIU, ZHI-TAO; LIU, WEI; XUE, QING-YUN; DING, XIAO-YU (2014):**  
**Comparative Chloroplast Genomes of photosynthetic Orchids: Insights into Evolution of the Orchidaceae and development of molecular Markers for phylogenetic Applications.**  
In: Public Library of Science One 9 (6), e99016. DOI: 10.1371/journal.pone.0099016.
- LUO, YI-BO; ZHU, GUANG-HUA; KURZWEIL, HUBERT (2005):**  
**The Gynostemium of *Hemipiliopsis purpureopunctata* and *Senghasiella glaucifolia*, two Taxonomically disputed Species of Habenariinae (Orchidaceae).**  
In: Botanical Journal of the Linnean Society 147 (2), p. 191–196. DOI: 10.1111/j.1095-8339.2005.00367.x.
- MARGONSKA, HANNA B.; SZLACHETKO, DARIUSZ L. (2001):**  
***Alatliparis* (Orchidaceae, Malaxidinae), a new Orchid Genus with two new Species from Sumatra.**  
In: Ann Bot Fennici 38, p. 77–81.
- MARGONSKA, HANNA B.; SZLACHETKO, DARIUSZ L. (2012):**  
**Two new Combinations and a new Subsection in *Crepidium* Bl. emend. Szlach. (Orchidaceae, Malaxidinae).**  
In: Annalen des Naturhistorischen Museums in Wien, Serie B 111, p. 175–180.
- MARTOS, FLORENT; JOHNSON, STEVEN D.; PETER, CRAIG I.; BYTEBIER, BENNY (2014):**  
**A molecular Phylogeny reveals Paraphyly of the large Genus *Eulophia* (Orchidaceae): A case for the Reinstatement of *Orthochilus*.**  
In: Taxon 63 (1), p. 9–23. DOI: 10.12705/631.6.
- MCMURTRY, DOUGLAS; BYTEBIER, BENNY (2015):**  
***Disa staerkeriana* (Orchidaceae): a new Species from Mpumalanga, South Africa.**  
In: Phytotaxa 203 (2), p. 192. DOI: 10.11646/phytotaxa.203.2.9.
- MICHENEAU, CLAIRE; CARLSWARD, BARBARA S.; FAY, MICHAEL F.; BYTEBIER, BENNY; PAILLER, THIERRY; CHASE, MARK W. (2008):**

**Phylogenetics and Biogeography of Mascarene Angraecoid Orchids (Vandaeae, Orchidaceae).**

In: *Molecular Phylogenetics and Evolution* 46 (3), p. 908–922. DOI: 10.1016/j.ympev.2007.12.001.

**MILLER, JOSEPH T.H.; CLEMENTS, MARK A. (2014):**

**Molecular phylogenetic Analyses of Drakaeinae: Diurideae (Orchidaceae) based on DNA Sequences of the Internal Transcribed Spacer Region.**

In: *Australian Systematic Botany* 27 (1), p. 3–22. DOI: 10.1071/SB13036.

**MOLINARI-NOVOA, EDUARDO ANTONIO (2015):**

**Homage to Christenson: Combinations under *Maxillaria*.**

In: *Richardiana* 15, p. 291–305.

**MONTEIRO, SILVANA HELENA N.; SELBACH-SCHNADELBACH, ALESSANDRA; OLIVEIRA, REYJANE PATRÍCIA; VAN DEN BERG, CÁSSIO (2010):**

**Molecular Phylogenetics of *Galeandra* (Orchidaceae: Catasetinae) based on Plastid and Nuclear DNA Sequences.**

In: *Systematic Botany* 35 (3), p. 476–486. DOI: 10.1600/036364410792495944.

**MYTNIK-EJSMONT, JOANNA; BARANOW, PRZEMYSŁAW (2010):**

**Taxonomic Study of *Polystachya* Hook. (Orchidaceae) from Asia.**

In: *Plant Systematics and Evolution* 290 (1-4), p. 57–63. DOI: 10.1007/s00606-010-0348-4.

**MYTNIK-EJSMONT, JOANNA; SZLACHETKO, DARIUSZ L.; BARANOW, PRZEMYSŁAW; GÓRNIAK, MARCIN (2014):**

**A phylogenetic and morphological Study of *Polystachya* Sect. *Superpositae* (Orchidaceae) with Description of a new Species from Cameroon.**

In: *Plant Systematics and Evolution* 300 (1), p. 19–28. DOI: 10.1007/s00606-013-0856-0.

**MYTNIK-EJSMONT, JOANNA; SZLACHETKO, DARIUSZ L.; BARANOW, PRZEMYSŁAW; JOLLIFFE, KEVIN; GÓRNIAK, MARCIN (2015):**

**Phylogenetic Placement and Taxonomy of the Genus *Hederorkis* (Orchidaceae).**

In: *Public Library of Science One* 10 (4), e0122306. DOI: 10.1371/journal.pone.0122306.

**NEUBIG, KURT M.; WHITTEN, WILLIAM MARK; BLANCO, MARIO A.; ENDARA, LORENA A.; WILLIAMS, NORRIS H.; KOEHLER, SAMANTHA (2015):**

**Preliminary molecular Phylogenetics of *Sobralia* and relatives (Orchidaceae: Sobralieae).**

In: *Lankesteriana* 11 (3), p. 307–317. DOI: 10.15517/lank.v11i3.18286.

**NEUBIG, KURT M.; WHITTEN, WILLIAM MARK; FLS, NORRIS H. WILLIAMS; BLANCO, MARIO A.; ENDARA, LORENA A.; BURLEIGH, JOHN GORDON ET AL. (2012):**

**Generic recircumscriptions of Oncidiinae (Orchidaceae: Cymbidieae) based on maximum likelihood Analysis of combined DNA Datasets.**

In: *Botanical Journal of the Linnean Society* 168, p. 117–146.

**NEUBIG, KURT M.; WILLIAMS, NORRIS H.; WHITTEN, WILLIAM MARK; PUPULIN, FRANCO (2009):**

**Molecular Phylogenetics and the Evolution of Fruit and Leaf Morphology of *Dichaea* (Orchidaceae: Zygopetalinae).**

In: *Annals of Botany* 104 (3), p. 457–467. DOI: 10.1093/aob/mcp004.

**NOGUERA-SAVELLI, ELIANA J.; GERMÁN CARNEVALI, F.-C.; ROMERO-GONZÁLEZ, GUSTAVO A. (2008):**

**Description of a new Species and Notes on *Crossoglossa* (Orchidaceae: Epidendroideae: Malaxideae) from the eastern Andes in Colombia and Venezuela.**

In: *Brittonia* 60 (3), p. 240–244. DOI: 10.1007/s12228-008-9020-5.

**NOWAK, SŁAWOMIR; SZLACHETKO, DARIUSZ L.; MYTNIK-EJSMONT, JOANNA; CLEEF, ANTOINE M. (2015):**

- Eight new Species of *Gomphichis* (Orchidaceae, Spiranthoideae) from Colombia.**  
In: *Plant Systematics and Evolution* 301 (1), p. 61–76. DOI: 10.1007/s00606-014-1054-4.
- OJEDA, ISIDRO; FERNÁNDEZ-CONCHA, GERMÁN CARNEVALI; ROMERO-GONZÁLEZ, GUSTAVO A. (2009):**  
***Nitidobulbon*, a new Genus of Maxillariinae (Orchidaceae).**  
In: *Novon: A Journal for Botanical Nomenclature* 19 (1), p. 96–101. DOI: 10.3417/2007039.
- PANSARIN, EMERSON R.; SALATINO, ANTONIO; SALATINO, MARIA LUIZA FARIA (2008):**  
**Phylogeny of South American Pogonieae (Orchidaceae, Vanilloideae) based on Sequences of nuclear ribosomal (ITS) and Chloroplast (*psaB*, *rbcl*, *rps16*, and *trnL-F*) DNA, with Emphasis on *Cleistis* and Discussion of biogeographic Implications.**  
In: *Organisms Diversity and Evolution* 8 (3), p. 171–181. DOI: 10.1016/j.ode.2007.09.003.
- PANSARIN, LUDMILA M.; PANSARIN, EMERSON R.; SAZIMA, MARLIES (2014):**  
**Osmophore Structure and Phylogeny of *Cirrhaea* (Orchidaceae, Stanhopeinae).**  
In: *Botanical Journal of the Linnean Society* 176, p. 369–383.
- PEDERSEN, HENRIK Æ.; WATTHANA, SANTI; ROY, MÉLANIE; SUDDEE, SOMRAN; SELOSSE, MARC-ANDRÉ (2009):**  
***Cephalanthera exigua* rediscovered: new Insights in the Taxonomy, Habitat Requirements and breeding System of a rare mycoheterotrophic Orchid.**  
In: *Nordic Journal of Botany* 27 (6), p. 460–468. DOI: 10.1111/j.1756-1051.2009.00465.x.
- PEDRON, MARCELO; BUZATTO, CRISTIANO ROBERTO; RAMALHO, ALINE JOSEPH; CARVALHO, BRUNO M.; RADINS, JOSÉ A.; SINGER, RODRIGO B.; BATISTA, JOÃO AGUIAR NOGUEIRA (2014):**  
**Molecular Phylogenetics and taxonomic Revision of *Habenaria* Section *Pentadactylae* (Orchidaceae, Orchidinae).**  
In: *Botanical Journal of the Linnean Society* 175 (1), p. 47–73. DOI: 10.1111/boj.12161.
- PERAZA-FLORES, LIZANDRON.; CARNEVALI, GERMÁN; VAN DEN BERG, CÁSSIO (2016):**  
**A molecular Phylogeny of the *Laelia* alliance (Orchidaceae) and a reassessment of *Laelia* and *Schomburgkia*.**  
In: *Taxon* 65 (6), p. 1249–1262. DOI: 10.12705/656.3.
- PÉREZ-ESCOBAR, OSCAR ALEJANDRO; GOTTSCHLING, MARC; WHITTEN, WILLIAM MARK; SALAZAR, GERARDO A.; GERLACH, GÜNTER (2016):**  
**Sex and the Catasetinae (Darwin's favourite Orchids).**  
In: *Molecular Phylogenetics and Evolution* 97, p. 1–10. DOI: 10.1016/j.ympev.2015.11.019.
- PÉREZ-ESCOBAR, OSCAR ALEJANDRO; KOLANOWSKA, MARTA; RINCÓN-USECHE, CRISTIAN (2013):**  
**A new Species of *Lepanthes* (Pleurothallidinae, Orchidaceae) from Colombia.**  
In: *Systematic Botany* 38 (2), p. 316–319. DOI: 10.1600/036364413X666822.
- PESSOA, EDLLEY MAX; ALVES, MARCCUS V.; ALVES-ARAÚJO, ANDERSON; PALMA-SILVA, CLARISSE; PINHEIRO, FÁBIO (2012):**  
**Integrating different Tools to disentangle Species Complexes: A case Study in *Epidendrum* (Orchidaceae).**  
In: *Taxon* 61 (4), p. 721–734. DOI: 10.1002/tax.614002.
- PILLON, YOHAN; FAY, MICHAEL F.; HEDRÉN, MIKAEL; BATEMAN, RICHARD M.; DEVEY, DION S.; SHIPUNOV, ALEXEY B. ET AL. (2007):**  
**Evolution and temporal Diversification of western European polyploid Species Complexes in *Dactylorhiza* (Orchidaceae).**  
In: *Taxon* 56 (4), p. 1185–1208. DOI: 10.2307/25065911.
- PINHEIRO, FÁBIO; COZZOLINO, SALVATORE (2013):**



***Epidendrum* (Orchidaceae) as a Model System for ecological and evolutionary Studies in the Neotropics.**

In: *Taxon* 62 (1), p. 77–78.

PINHEIRO, FÁBIO; KOEHLER, SAMANTHA; CORRÊA, ANDRÉA MACÊDO; SALATINO, MARIA LUIZA FARIA; SALATINO, ANTONIO; BARROS, FÁBIO (2009):

**Phylogenetic Relationships and infrageneric Classification of *Epidendrum* Subgenus *Amphiglottium* (Laeliinae, Orchidaceae).**

In: *Plant Systematics and Evolution* 283 (3-4), p. 165–177. DOI: 10.1007/s00606-009-0224-2.

PONSIE, M. E.; MITCHELL, ANTHONY D.; EDWARDS, TREVOR J.; JOHNSON, STEVEN D. (2007):

**Phylogeny of *Bonatea* (Orchidaceae: Habenariinae) based on molecular and morphological Data.**

In: *Plant Systematics and Evolution* 263 (3-4), p. 253–268. DOI: 10.1007/s00606-006-0487-9.

PRIDGEON, ALEC M.; SOLANO, RODOLFO; CHASE, MARK W. (2001):

**Phylogenetic Relationships in Pleurothallidinae (Orchidaceae): combined Evidence from nuclear and Plastid DNA Sequences.**

In: *American Journal of Botany* 88 (12), p. 2286–2308. DOI: 10.2307/3558390.

PUPULIN, FRANCO; BOGARÍN, DIEGO (2007):

**A second Species of *Restrepiella* (Orchidaceae: Pleurothallidinae).**

In: *Willdenowia* 37 (1), p. 323–329. DOI: 10.3372/wi.37.37122.

PUPULIN, FRANCO; KARREMANS, ADAM P.; BELFORT OCONITRILLO, NOELIA (2017):

**Two new Species of *Echinosepala* (Orchidaceae: Pleurothallidinae).**

In: *Lankesteriana* 17 (2). DOI: 10.15517/lank.v17i2.30205.

PUPULIN, FRANCO; KARREMANS, ADAM P.; GRAVENDEEL, BARBARA (2012):

**A Reconsideration of the empusellous Species of *Specklinia* (Orchidaceae: Pleurothallidinae) in Costa Rica.**

In: *Phytotaxa* 63, p. 1–20.

QUINTANILLA-QUINTERO, SONIA; ORTIZ, PEDRO L.; BERNAL, JAIME E.; GÓMEZ, ALBERTO (2011):

**Phylogenetic Relationships among Genera of the Subtribe Oncidiinae Epidendroideae: Orchidaceae and a new Genus: *Santanderella*.**

In: *Phytologia* 93 (3), p. 388–406.

RAKOTOARIVELO, FANNY P.; RAZAFIMANDIMBISON, SYLVAIN G.; MALLET, BERTRAND; FALINIAINA, LUCIEN; PAILLER, THIERRY (2012):

**Molecular Systematics and evolutionary Trends and Relationships in the Genus *Jumellea* (Orchidaceae): Implications for its Species limits.**

In: *Taxon* 61 (3), p. 534–544. DOI: 10.1002/tax.613004.

RASKOTI, BHAKTA BAHADUR; JIN, WEI-TAO; XIANG, XIAO-GUO; SCHUITEMAN, ANDRÉ; LI, DE-ZHU; LI, JIAN-WU ET AL. (2016):

**A phylogenetic Analysis of molecular and morphological Characters of *Herminium* (Orchidaceae, Orchideae): evolutionary Relationships, Taxonomy, and Patterns of Character Evolution.**

In: *Cladistics* 32 (2), p. 198–210. DOI: 10.1111/cla.12125.

ROMERO-GONZÁLEZ, GUSTAVO A.; BATISTA, JOÃO AGUIAR NOGUEIRA; BEM BIANCHETTI, LUCIANO (2008):

**A Synopsis of the Genus *Cyrtopodium* (Catasetinae: Orchidaceae).**

In: *Harvard Papers in Botany* 13 (1), p. 189–206. DOI: 10.3100/1043-4534(2008)13[189:ASOTGC]2.0.CO;2.

- ROMERO-GONZÁLEZ, GUSTAVO A.; FERNÁNDEZ-CONCHA, GERMÁN CARNEVALI; BRITO, A. L. V. TOSCANO DE (2016):**  
**Novelties in the Orchid Flora of Venezuela IX. Subtribe Pleurothallidinae. New Combinations in *Anathallis* and a new Report for the Orchid Flora of Colombia.**  
In: *Harvard Papers in Botany* 21 (1), p. 23–29. DOI: 10.3100/hpib.v21iss1.2016.n3.
- RUSSELL, ANTON; SAMUEL, ROSABELLE; BOGARÍN, DIEGO; FERNANDO, SURANJAN; WIJESUNDERA, SIRIL; KLEJNA, VERENA; CHASE, MARK W. (2011):**  
**Genetic Variation and phylogenetic Relationships of a pantropical Species Group in *Polystachya* (Orchidaceae).**  
In: *Botanical Journal of the Linnean Society* 165 (3), p. 235–250. DOI: 10.1111/j.1095-8339.2010.01108.x.
- RUSSELL, ANTON; SAMUEL, ROSABELLE; RUPP, BARBARA; BARFUSS, MICHAEL H. J.; ŠAFRAN, MARKO; BESENDORFER, VIŠNJA; CHASE, MARK W. (2010):**  
**Phylogenetics and Cytology of a pantropical Orchid Genus *Polystachya* (Polystachyinae, Vandeeae, Orchidaceae): Evidence from Plastid DNA Sequence Data.**  
In: *Taxon* 59 (2), p. 389–404. DOI: 10.1002/tax.592005.
- SAEKI, IKUYO; KITAZAWA, ASAKO; ABE, ATSUSHI; MINEMOTO, KOYA; KOIKE, FUMITO (2014):**  
**Phylogeography of a rare Orchid, *Vexillabium yakushimense*: Comparison of Populations in central Honshu and the Nansei Island Chain, Japan.**  
In: *Plant Systematics and Evolution* 300 (1), p. 1–12. DOI: 10.1007/s00606-013-0854-2.
- SALAZAR, GERARDO A.; BALLESTEROS-BARRERA, CLAUDIA (2010):**  
***Sotoa*, a new Genus of Spiranthinae (Orchidaceae) from Mexico and the Southern United States.**  
In: *Lankesteriana* 9 (3), p. 491–504.
- SALAZAR, GERARDO A.; CABRERA, LIDIA I.; FIGUEROA, COYOLXAUHQUI (2011):**  
**Molecular Phylogenetics, Floral convergence and Systematics of *Dichromanthus* and *Stenorrhynchos* (Orchidaceae: Spiranthinae).**  
In: *Botanical Journal of the Linnean Society* 167 (1), p. 1–18. DOI: 10.1111/j.1095-8339.2011.01161.x.
- SALAZAR, GERARDO A.; CABRERA, LIDIA I.; MADRIÑÁN, SANTIAGO; CHASE, MARK W. (2009):**  
**Phylogenetic Relationships of Cranichidinae and Prescottiinae (Orchidaceae, Cranichideae) inferred from Plastid and nuclear DNA Sequences.**  
In: *Annals of Botany* 104 (3), p. 403–416. DOI: 10.1093/aob/mcn257.
- SALAZAR, GERARDO A.; CHASE, MARK W.; SOTO-ARENAS, MIGUEL A.; INGROUILLE, MARTIN J. (2003):**  
**Phylogenetics of Cranichideae with Emphasis on Spiranthinae (Orchidaceae, Orchidoideae): Evidence from Plastid and nuclear DNA Sequences.**  
In: *American Journal of Botany* 90 (5), p. 777–795. DOI: 10.3732/ajb.90.5.777.
- SALAZAR, GERARDO A.; VAN DEN BERG, CÁSSIO; POPOVKIN, ALEX (2014):**  
**Phylogenetic Relationships of *Discyphus scopulariae* (Orchidaceae, Cranichideae) inferred from Plastid and nuclear DNA Sequences: Evidence supporting Recognition of a new Subtribe, *Discyphinae*.**  
In: *Phytotaxa* 173 (2), p. 127. DOI: 10.11646/phytotaxa.173.2.3.
- SARDARO, MARIA LUISA SAVO; ATALLAH, MAROUN; PICARELLA, MAURIZIO ENEA; ARACRI, BENEDETTO; PAGNOTTA, MARIO A. (2012):**  
**Genetic Diversity, Population Structure and phylogenetic Inference among Italian Orchids of the *Serapias* Genus assessed by AFLP molecular Markers.**  
In: *Plant Systematics and Evolution* 298 (9), p. 1701–1710. DOI: 10.1007/s00606-012-0671-z.
- SCHUITEMAN, ANDRÉ; BONNET, PIERRE; SVENGSUKSA, BOUAKHAYKHONE; BARTHÉLÉMY, DANIEL (2008):**

**An annotated Checklist of the Orchidaceae of Laos.**

In: Nordic Journal of Botany 26 (5-6), p. 257–316. DOI: 10.1111/j.1756-1051.2008.00265.x.

**SCHUITEMAN, ANDRÉ; CHASE, MARK W. (2015):**

**A reappraisal of *Maxillaria* (Orchidaceae).**

In: Phytotaxa 225 (1), p. 1. DOI: 10.11646/phytotaxa.225.1.1.

**SCHUITEMAN, ANDRÉ; VOGEL, EDUARD F. (2003):**

**New Names and Combinations in Orchidaceae from the Philippines and New Guinea.**

In: Blumea 48 (3), p. 507–514. DOI: 10.3767/000651903X489500.

**SHIPUNOV, ALEXEY B.; FAY, MICHAEL F.; PILLON, YOHAN; BATEMAN, RICHARD M.; CHASE, MARK W. (2004):**

***Dactylorhiza* (Orchidaceae) in European Russia: Combined molecular and morphological Analysis.**

In: American Journal of Botany 91 (9), p. 1419–1426.

**SIMO-DROISSART, MURIELLE; MICHENEAU, CLAIRE; SONKÉ, BONAVENTURE; DROISSART, VINCENT; PLUNKETT, GREGORY M.; LOWRY, PORTER PRESCOTT II. ET AL. (2013):**

**Morphometrics and molecular Phylogenetics of the continental African Species of *Angraecum* Section *Pectinaria* (Orchidaceae).**

In: Plant Ecology and Evolution 146 (3), p. 295–309. DOI: 10.5091/plecevo.2013.900.

**SIMO-DROISSART, MURIELLE; PLUNKETT, GREGORY M.; DROISSART, VINCENT; EDWARDS, MOLLY B.; FARMINHÃO, JOÃO N. M.; JEČMENICA, VLADIMIR ET AL. (2018):**

**New phylogenetic Insights toward Developing a natural generic Classification of African *Angraecoid* Orchids (Vandaeae, Orchidaceae).**

In: Molecular Phylogenetics and Evolution 126, p. 241–249. DOI: 10.1016/j.ympev.2018.04.021.

**SIMO-DROISSART, MURIELLE; SONKÉ, BONAVENTURE; DROISSART, VINCENT; MICHENEAU, CLAIRE; LOWRY, PORTER PRESCOTT; HARDY, OLIVIER J. ET AL. (2016):**

**Morphometrics and molecular Phylogenetics of *Angraecum* Section *Dolabrifolia* (Orchidaceae, Angraecinae).**

In: Plant Systematics and Evolution 302 (8), p. 1027–1045. DOI: 10.1007/s00606-016-1315-5.

**SMIDT, ERIC C.; BORBA, EDUARDO L.; GRAVENDEEL, BARBARA; FISCHER, GUNTER ALEXANDER; VAN DEN BERG, CÁSSIO (2011):**

**Molecular Phylogeny of the Neotropical Sections of *Bulbophyllum* (Orchidaceae) using Nuclear and Plastid Spacers.**

In: Taxon 60 (4), p. 1050–1064.

**SOLIVA, M.; KOCYAN, ALEXANDER; WIDMER, ALEX (2001):**

**Molecular Phylogenetics of the sexually deceptive Orchid Genus *Ophrys* (Orchidaceae) based on nuclear and Chloroplast DNA Sequences.**

In: Molecular Phylogenetics and Evolution 20 (1), p. 78–88. DOI: 10.1006/mpev.2001.0953.

**SOSA, VICTORIA (2007):**

**A molecular and morphological phylogenetic Study of Subtribe Bletiinae (Epidendreae, Orchidaceae).**

In: Systematic Botany 32 (1), p. 34–42.

**SRAMKÓ, GÁBOR; ATTILA, MOLNÁR V.; HAWKINS, JULIE A.; BATEMAN, RICHARD M. (2014):**

**Molecular Phylogeny and evolutionary History of the Eurasiatic Orchid Genus *Himantoglossum* s.l. (Orchidaceae).**

In: Annals of Botany 114 (8), p. 1609–1626. DOI: 10.1093/aob/mcu179.

**SRIKANTH, KRISHNAMOORTHY; KOO, JA CHOON; WHANG, SUNG SOO (2013):**

**Genetic Relationships between Korean *Calanthe* Species and some naturally occurring Mutants based on multiple DNA Markers.**

In: Nordic Journal of Botany 31 (6), p. 757–766. DOI: 10.1111/j.1756-1051.2013.00152.x.

**SURVESWARAN, SIDDHARTHAN; GOWDA, VINITA; SUN, MEI (2018):**

**Using an integrated approach to identify cryptic species, Divergence Patterns and hybrid Species in Asian ladies' tresses Orchids (*Spiranthes*, Orchidaceae).**

In: Molecular Phylogenetics and Evolution 124, p. 106–121. DOI: 10.1016/j.ympev.2018.02.025.

**SZLACHETKO, DARIUSZ L.; GÓRNIAK, MARCIN; KOLANOWSKA, MARTA; MYTNIK-EJSMONT, JOANNA; KOWALKOWSKA, AGNIESZKA K.; RUTKOWSKI, PIOTR; KOLIŃSKI, TOMASZ (2014):**

**Taxonomic Position and Phylogeny of the Genus *Vargasiella* (Orchidaceae, Vandoideae) based on molecular and morphological Evidence.**

In: Public Library of Science One 9 (6), e98472. DOI: 10.1371/journal.pone.0098472.

**SZLACHETKO, DARIUSZ L.; KOLANOWSKA, MARTA (2013):**

**Three new Species of *Ponthieva* (Orchidaceae, Spiranthoideae) from Colombia and Venezuela.**

In: Plant Systematics and Evolution 299 (9), p. 1671–1678. DOI: 10.1007/s00606-013-0824-8.

**SZLACHETKO, DARIUSZ L.; KOLANOWSKA, MARTA (2014):**

**A new Species of *Scaphyglottis* (Orchidaceae, Epidendroideae) from Colombia.**

In: Plant Systematics and Evolution 300 (5), p. 1031–1034. DOI: 10.1007/s00606-013-0941-4.

**SZLACHETKO, DARIUSZ L.; KOLANOWSKA, MARTA (2015):**

**Reconsideration of *Heteranthocidium* (Oncidiinae, Orchidaceae): new Species and taxonomic Transfers.**

In: Plant Systematics and Evolution 301 (7), p. 1793–1805. DOI: 10.1007/s00606-014-1189-3.

**SZLACHETKO, DARIUSZ L.; NOWAK, SŁAWOMIR (2014):**

**Two new Species of *Aa* (Orchidaceae, Spiranthoideae) from Colombia.**

In: Plant Systematics and Evolution 300 (8), p. 1833–1841. DOI: 10.1007/s00606-014-1010-3.

**SZLACHETKO, DARIUSZ L.; SITKO, MAGDALENA; TUKAŁŁO, PIOTR; MYTNIK-EJSMONT, JOANNA (2012):**

**Taxonomy of the Subtribe Maxillariinae (Orchidaceae, Vandoideae) revised.**

In: Biodiversity: Research and Conservation 25 (1), p. 13–38. DOI: 10.2478/v10119-012-0017-2.

**TAKAMIYA, TOMOKO; WONGSAWAD, PHERAVUT; SATHAPATTAYANON, APIRADA; TAJIMA, NATSUKO; SUZUKI, SHUNICHIRO; KITAMURA, SAKI ET AL. (2014):**

**Molecular Phylogenetics and Character Evolution of morphologically diverse Groups, *Dendrobium* Section *Dendrobium* and Allies.**

In: AoB PLANTS 6. DOI: 10.1093/aobpla/plu045.

**TANG, YING; YUKAWA, TOMOHISA; BATEMAN, RICHARD M.; JIANG, HONG; PENG, HUA (2015):**

**Phylogeny and Classification of the East Asian *Amitostigma* alliance (Orchidaceae: Orchideae) based on six DNA Markers.**

In: BMC Evolutionary Biology 15, p. 96. DOI: 10.1186/s12862-015-0376-3.

**TOPIK, HIDAYAT; YUKAWA, TOMOHISA; ITO, MOTOMI (2005):**

**Molecular Phylogenetics of Subtribe Aeridinae (Orchidaceae): Insights from Plastid *matK* and nuclear ribosomal ITS Sequences.**

In: Journal of Plant Research 118 (4), p. 271–284. DOI: 10.1007/s10265-005-0217-3.

**TSAI, CHI-CHU; CHIANG, YU-CHUNG; HUANG, S.C.; CHEN, C. H.; CHOU, CHANG-HUNG (2010):**

**Molecular Phylogeny of *Phalaenopsis* Blume (Orchidaceae) on the basis of Plastid and nuclear DNA.**

In: Plant Systematics and Evolution 288 (1-2), p. 77–98. DOI: 10.1007/s00606-010-0314-1.

**TSAI, CHI-CHU; HUANG, S.C.; CHOU, CHANG-HUNG (2005):**

**Molecular Phylogeny of *Phalaenopsis* Blume (Orchidaceae) based on the Internal Transcribed Spacer of the nuclear ribosomal DNA.**

In: Plant Systematics and Evolution 256 (1-4), p. 1–16. DOI: 10.1007/s00606-005-0356-y.

**TSUKAYA, HIROKAZU; NAKAJIMA, MUTSUOKO; OKADA, HIROSHI (2011):**

***Kalimantanorchis*: a new Genus of Mycotrophic Orchid from West Kalimantan, Borneo.**

In: Systematic Botany 36 (1), p. 49–52. DOI: 10.1600/036364411X553117.

**TSUTSUMI, CHIE; YUKAWA, TOMOHISA; LEE, NAM SOOK; LEE, CHANG-SHOOK; KATO, MASAHIRO (2007):**

**Phylogeny and comparative Seed Morphology of epiphytic and terrestrial Species of *Liparis* (Orchidaceae) in Japan.**

In: Journal of Plant Research 120 (3), p. 405–412. DOI: 10.1007/s10265-007-0077-0.

**VAN DEN BERG, CÁSSIO (2014):**

**Reaching a compromise between conflicting nuclear and Plastid phylogenetic Trees: a new Classification for the Genus *Cattleya* (Epidendreae; Epidendroideae; Orchidaceae).**

In: Phytotaxa 186 (2), p. 75. DOI: 10.11646/phytotaxa.186.2.2.

**VAN DEN BERG, CÁSSIO (2015):**

**Nomenclatural Notes in *Guarianthe* (Orchidaceae: Laeliinae): Clarification of *Guarianthe* × *deckeri*, *G.* × *guatemalensis* and *G. patinii*.**

In: Phytotaxa 239 (1), p. 65. DOI: 10.11646/phytotaxa.239.1.6.

**VAN DEN BERG, CÁSSIO; GOLDMAN, DOUGLAS H.; FREUDENSTEIN, JOHN V.; PRIDGEON, ALEC M.; CAMERON, KENNETH M.; CHASE, MARK W. (2005):**

**An overview of the phylogenetic Relationships within Epidendroideae inferred from multiple DNA Regions and Recircumscription of Epidendreae and Arethuseae (Orchidaceae).**

In: American Journal of Botany 92 (4), p. 613–624. DOI: 10.3732/ajb.92.4.613.

**VAN DEN BERG, CÁSSIO; HIGGINS, WESLEY E.; DRESSLER, ROBERT L.; WHITTEN, WILLIAM MARK; SOTO-ARENAS, MIGUEL A.; CHASE, MARK W. (2009):**

**A phylogenetic Study of Laeliinae (Orchidaceae) based on combined nuclear and Plastid DNA Sequences.**

In: Annals of Botany 104 (3), p. 417–430. DOI: 10.1093/aob/mcp101.

**VAN DER NIET, TIMOTHEÛS; JÜRGENS, A.; JOHNSON, STEVEN D. (2010):**

**Pollinators, Floral Morphology and scent Chemistry in the southern African Orchid Genus *Schizochilus*.**

In: South African Journal of Botany 76 (4), p. 726–738. DOI: 10.1016/j.sajb.2010.07.004.

**VAN DER NIET, TIMOTHEÛS; LILTVED, WILLIAM R.; JOHNSON, STEVEN D. (2011):**

**More than meets the Eye: a morphological and phylogenetic Comparison of long-spurred, white-flowered *Satyrium* Species (Orchidaceae) in South Africa.**

In: Botanical Journal of the Linnean Society 166 (4), p. 417–430. DOI: 10.1111/j.1095-8339.2011.01143.x.

**VAN DER NIET, TIMOTHEÛS; LINDER, HANS PETER; BYTEBIER, BENNY; BELLSTEDT, DIRK U. (2005):**

- Molecular Markers Reject Monophyly of the Subgenera of *Satyrium* (Orchidaceae).**  
In: Systematic Botany 30 (2), p. 263–274.
- VAN DER NIET, TIMOTHEÛS; PETER LINDER, H. (2008):**  
**Dealing with Incongruence in the Quest for the Species Tree: a case Study from the Orchid Genus *Satyrium*.**  
In: Molecular Phylogenetics and Evolution 47 (1), p. 154–174. DOI: 10.1016/j.ympev.2007.12.008.
- VÁZQUEZ, FRANCISCO M.; JOSÉ BLANCO, DAVID GARCÍA; MÁRQUEZ, FRANCISCO; GUERRA, MARÍA JOSÉ (2015):**  
**Review of *Anacamptis* Sect. *Morianthus* Taxa from SW-Iberian Peninsula.**  
In: Journal Europäischer Orchideen 47 (2-4), p. 338–364.
- VERMA, DURGESH; SINGH, P. K.; MAO, A. A. (2013):**  
**Notes on Diversity and Distribution of Tribe Orchideae in *Meghalaya*.**  
In: Keanean Journal of Science 2, p. 83–92.
- VERMEULEN, JAAP J. (2008):**  
**New Species of *Bulbophyllum* from eastern Malesia (Orchidaceae).**  
In: Nordic Journal of Botany 26 (3-4), p. 129–195. DOI: 10.1111/j.1756-1051.2008.00220.x.
- VERMEULEN, JAAP J.; SCHUITEMAN, ANDRÉ; VOGEL, EDUARD F. (2014):**  
**Nomenclatural Changes in *Bulbophyllum* (Orchidaceae; Epidendroideae).**  
In: Phytotaxa 166 (2), p. 101. DOI: 10.11646/phytotaxa.166.2.1.
- VERMEULEN, JAAP J.; VOGEL, EDUARD F.; VOGEL, A.P.T.M. (2010):**  
**A new Species of *Bulbophyllum* Section *Epicriantes* (Orchidaceae) from Papua Province, Indonesia.**  
In: Blumea 55 (3), p. 276–277. DOI: 10.3767/000651910X547101.
- WATERMAN, RICHARD J.; PAUW, ANTON; BARRACLOUGH, TIMOTHY G.; SAVOLAINEN, VINCENT (2009):**  
**Pollinators underestimated: a molecular Phylogeny reveals widespread Floral Convergence in oil-secreting Orchids (Sub-tribe Coryciinae) of the Cape of South Africa.**  
In: Molecular Phylogenetics and Evolution 51 (1), p. 100–110. DOI: 10.1016/j.ympev.2008.05.020.
- WHITTEN, WILLIAM MARK; BLANCO, MARIO A.; WILLIAMS, NORRIS H.; KOEHLER, SAMANTHA; CARNEVALI, GERMÁN; SINGER, RODRIGO B. ET AL. (2007):**  
**Molecular Phylogenetics of *Maxillaria* and related Genera (Orchidaceae: Cymbidieae) based on combined molecular Data Sets.**  
In: American Journal of Botany 94 (11), p. 1860–1889. DOI: 10.3732/ajb.94.11.1860.
- WHITTEN, WILLIAM MARK; NEUBIG, KURT M.; WILLIAMS, NORRIS H. (2014):**  
**Generic and Subtribal Relationships in Neotropical Cymbidieae (Orchidaceae) based on matK/ycf1 Plastid Data.**  
In: Lankesteriana 13 (3), p. 375–392. DOI: 10.15517/lank.v13i3.14425.
- WHITTEN, WILLIAM MARK; WILLIAMS, NORRIS H.; CHASE, MARK W. (2000):**  
**Subtribal and generic Relationships of Maxillarieae (Orchidaceae) with Emphasis on Stanhopeinae: combined molecular Evidence.**  
In: American Journal of Botany 87 (12), p. 1842–1856. DOI: 10.2307/2656837.
- WHITTEN, WILLIAM MARK; WILLIAMS, NORRIS H.; DRESSLER, ROBERT L.; GERLACH, GÜNTER; PUPULIN, FRANCO (2005):**  
**Generic Relationships of Zygopetalinae (Orchidaceae: Cymbidieae): combined molecular Evidence.**  
In: Lankesteriana 5 (2), p. 87–107.

- WILLIAMS, NORRIS H.; WHITTEN, WILLIAM MARK; DRESSLER, ROBERT L. (2005):**  
**Molecular Systematics of *Telipogon* (Orchidaceae: Oncidiinae) and ITS Allies: Nuclear and Plastid DNA Sequence Data.**  
 In: Lankesteriana 5 (3), p. 163–184.
- WILSON, MARK; FRANK, GRAHAM S.; JOST, LOU; PRIDGEON, ALEC M.; VIEIRA-URIBE, SEBASTIAN; KARREMAN, ADAM P. (2017):**  
**Phylogenetic Analysis of *Andinia* (Pleurothallidinae; Orchidaceae) and a systematic Re-Circumscription of the Genus.**  
 In: Phytotaxa 295 (2), p. 101. DOI: 10.11646/phytotaxa.295.2.1.
- WONNAPINI, PASSORN; SRIBOONLERT, AJARAPORN (2015):**  
**Molecular Phylogenetics of Species of *Bulbophyllum* Sect. *Trias* (Orchidaceae; Epidendroideae; Malaxidae) based on nrITS and Plastid rbcL and matK.**  
 In: Phytotaxa 226 (1), p. 1–17. DOI: 10.11646/phytotaxa.226.1.1.
- XIANG, XIAO-GUO; JIN, WEI-TAO; LI, DE-ZHU; SCHUITEMAN, ANDRÉ; HUANG, WEI-CHANG; LI, JIAN-WU ET AL. (2014):**  
**Phylogenetics of Tribe Collabieae (Orchidaceae, Epidendroideae) based on four Chloroplast Genes with morphological Appraisal.**  
 In: Public Library of Science One 9 (1), e87625. DOI: 10.1371/journal.pone.0087625.
- XIANG, XIAO-GUO; LI, DE-ZHU; JIN, WEI-TAO; ZHOU, HAI-LANG; LI, JIAN-WU; JIN, XIAO-HUA (2012):**  
**Phylogenetic Placement of the enigmatic Orchid Genera *Thaia* and *Tangtsinia*: Evidence from molecular and morphological Characters.**  
 In: Taxon 61 (1), p. 45–54. DOI: 10.1002/tax.611003.
- XIANG, XIAO-GUO; SCHUITEMAN, ANDRÉ; LI, DE-ZHU; HUANG, WEI-CHANG; CHUNG, SHIH-WEN; LI, JIAN-WU ET AL. (2013):**  
**Molecular Systematics of *Dendrobium* (Orchidaceae, Dendrobieae) from mainland Asia based on Plastid and nuclear Sequences.**  
 In: Molecular Phylogenetics and Evolution 69 (3), p. 950–960. DOI: 10.1016/j.ympev.2013.06.009.
- YANG, JUN-BO; TANG, MIN; LI, HONG-TAO; ZHANG, ZHI-RONG; LI, DE-ZHU (2013):**  
**Complete Chloroplast Genome of the Genus *Cymbidium*: lights into the Species Identification, phylogenetic Implications and Population genetic Analyses.**  
 In: BMC Evolutionary Biology 13, p. 84. DOI: 10.1186/1471-2148-13-84.
- YUKAWA, TOMOHISA; CRIBB, PHILLIP J. (2014):**  
**Nomenclatural Changes in the Genus *Calanthe* (Orchidaceae).**  
 In: Bulletin of the National Museum of Nature and Science, Tokyo, Series Botany 40 (4), p. 145–151.
- YUKAWA, TOMOHISA; OHBA, HIDEAKI; CAMERON, KENNETH M.; CHASE, MARK W. (1996):**  
**Chloroplast DNA Phylogeny of Subtribe Dendrobiinae (Orchidaceae): Insights from a combined Analysis based on RbcL Sequences and Restriction Site Variation.**  
 In: Journal of Plant Research 109 (2), p. 169–176. DOI: 10.1007/BF02344542.
- ZHAI, JUN-WEN; ZHANG, GUO-QIANG; CHEN, LI-JUN; XIAO, XIN-JU; LIU, KE-WEI; TSAI, WEN-CHIEH ET AL. (2013):**  
**A new Orchid Genus, *Danxiaorchis*, and phylogenetic Analysis of the Tribe Calypsoeae.**  
 In: Public Library of Science One 8 (4), e60371. DOI: 10.1371/journal.pone.0060371.
- ZHAI, JUN-WEN; ZHANG, GUO-QIANG; LI, LIN; WANG, MEINA; CHEN, LI-JUN; CHUNG, SHIH-WEN ET AL. (2014):**  
**A new phylogenetic Analysis sheds new Light on the Relationships in the *Calanthe* alliance (Orchidaceae) in China.**  
 In: Molecular Phylogenetics and Evolution 77, p. 216–222. DOI: 10.1016/j.ympev.2014.04.005.

ZHANG, GUO-QIANG; LIU, KE-WEI; CHEN, LI-JUN; XIAO, XIN-JU; ZHAI, JUN-WEN; LI, LI-QIANG ET AL. (2013):  
**A new molecular Phylogeny and a new Genus, *Pendulorchis*, of the *Aerides-Vanda* alliance (Orchidaceae: Epidendroideae).**

In: Public Library of Science One 8 (4), e60097. DOI: 10.1371/journal.pone.0060097.

ZOU, LONG-HAI; HUANG, JIU-XIANG; ZHANG, GUO-QIANG; LIU, ZHONG-JIAN; ZHUANG, XUE-YING (2015):  
**A molecular Phylogeny of Aeridinae (Orchidaceae: Epidendroideae) inferred from multiple nuclear and Chloroplast Regions.**

In: Molecular Phylogenetics and Evolution 85, p. 247–254. DOI: 10.1016/j.ympev.2015.02.014.

## Orobanchaceae

DONG, LI-NA; WANG, HONG; WORTLEY, ALEXANDRA H.; LU, LU; LI, DE-ZHU (2013):  
**Phylogenetic Relationships in the *Pterygiella* complex (Orobanchaceae) inferred from molecular and morphological Evidence.**

In: Botanical Journal of the Linnean Society 171, p. 491–507.

EATON, DEREN A. R.; REE, RICHARD H. (2013):  
**Inferring Phylogeny and Introgression using RADseq Data: an Example from Flowering Plants (*Pedicularis*: Orobanchaceae).**

In: Systematic Biology 62 (5), p. 689–706. DOI: 10.1093/sysbio/syt032.

FISCHER, EBERHARD; SCHÄFERHOFF, BASTIAN; MÜLLER, KAI F. (2012):  
**The new monotypic Genus *Bardotia* (Orobanchaceae) from Madagascar and Remarks on the phylogenetic Relationships of the African and Madagascan Genera *Parastriga*, *Radamaea*, *Rhamphicarpa* and *Sieversandreas*.**

In: Phytotaxa 46, p. 19–33.

FRAJMAN, BOŽO; CARLÓN, LUIS; KOSACHEV, PETR A.; SÁNCHEZ PEDRAJA, ÓSCAR; SCHNEEWEISS, GERALD M.; SCHÖNSWETTER, PETER (2013):  
**Phylogenetic Position and Taxonomy of the enigmatic *Orobanche krylowii* (Orobanchaceae), a predominately Asian Species newly found in Albania (SE Europe).**

In: Phytotaxa 137 (1), p. 1. DOI: 10.11646/phytotaxa.137.1.1.

GARG, ARTI (2009):  
**Critical taxonomic Appraisal of some Taxa of *Pedicularis* from Indian Himalayas belonging to Section *Siphonantha*.**

In: Taiwania 54 (2), p. 122–133.

GAUDEUL, MYRIAM; VÉLA, ERROL; ROUHAN, GERMINAL (2016):  
**Eastward Colonization of the Mediterranean Basin by two geographically Structured Clades: the Case of *Odontites* Ludw. (Orobanchaceae).**

In: Molecular Phylogenetics and Evolution 96, p. 140–149. DOI: 10.1016/j.ympev.2015.12.008.

GUSSAROVA, GALINA (2017):  
**New Combinations in Nearctic endemic *Euphrasia* (Orobanchaceae).**

In: Journal of the Botanical Research Institute of Texas 11 (2), p. 289–290.

GUSSAROVA, GALINA; POPP, MAGNUS; VITEK, ERNST; BROCHMANN, CHRISTIAN (2008):  
**Molecular Phylogeny and Biogeography of the bipolar *Euphrasia* (Orobanchaceae): recent Radiations in an old Genus.**

In: Molecular Phylogenetics and Evolution 48 (2), p. 444–460. DOI: 10.1016/j.ympev.2008.05.002.

LIU, MIN-LU; YU, WEN-BIN; KUSS, PATRICK; LI, DE-ZHU; WANG, HONG (2015):  
**Floral nectary Morphology and Evolution in *Pedicularis* (Orobanchaceae).**



- In: *Botanical Journal of the Linnean Society* 178, 592–507.
- MANEN, JEAN-FRANÇOIS; HABASHI, CHRISTINE; JEANMONOD, DANIEL; PARK, JEONG-MI; SCHNEEWEISS, GERALD M. (2004):**  
**Phylogeny and intraspecific variability of holoparasitic *Orobanche* (Orobanchaceae) inferred from Plastid *rbcl* Sequences.**  
In: *Molecular Phylogenetics and Evolution* 33 (2), p. 482–500. DOI: 10.1016/j.ympev.2004.06.010.
- MCNEAL, JOEL R.; BENNETT, JONATHAN R.; WOLFE, ANDREA D.; MATHEWS, SARAH (2013):**  
**Phylogeny and Origins of Holoparasitism in Orobanchaceae.**  
In: *American Journal of Botany* 100 (5), p. 971–983. DOI: 10.3732/ajb.1200448.
- MORAWETZ, JEFFERY J.; RANDLE, CHRISTOPHER P.; WOLFE, ANDREA D. (2010):**  
**Phylogenetic Relationships within the tropical Clade of Orobanchaceae.**  
In: *Taxon* 59 (2), p. 416–426.
- MORAWETZ, JEFFERY J.; WOLFE, ANDREA D. (2009):**  
**Assessing the Monophyly of *Alectra* and its Relationship to *Melasma* (Orobanchaceae).**  
In: *Systematic Botany* 34 (3), p. 561–569. DOI: 10.1600/036364409789271281.
- OJA, TATJANA; TALVE, TIINA (2012):**  
**Genetic Diversity and Differentiation in six Species of the Genus *Rhinanthus* (Orobanchaceae).**  
In: *Plant Systematics and Evolution* 298 (5), p. 901–911. DOI: 10.1007/s00606-012-0599-3.
- PARK, JEONG-MI; MANEN, JEAN-FRANÇOIS; COLWELL, ALISON E. L.; SCHNEEWEISS, GERALD M. (2008):**  
**A Plastid Gene Phylogeny of the non-photosynthetic parasitic *Orobanche* (Orobanchaceae) and related Genera.**  
In: *Journal of Plant Research* 121 (4), p. 365–376. DOI: 10.1007/s10265-008-0169-5.
- PARK, JEONG-MI; MANEN, JEAN-FRANÇOIS; SCHNEEWEISS, GERALD M. (2007):**  
**Horizontal Gene transfer of a Plastid Gene in the non-photosynthetic Flowering Plants *Orobanche* and *Phelipanche* (Orobanchaceae).**  
In: *Molecular Phylogenetics and Evolution* 43 (3), p. 974–985. DOI: 10.1016/j.ympev.2006.10.011.
- PETTENGILL, JAMES B.; NEEL, MAILE C. (2008):**  
**Phylogenetic Patterns and conservation among North American members of the Genus *Agalinis* (Orobanchaceae).**  
In: *BMC Evolutionary Biology* 8, p. 264. DOI: 10.1186/1471-2148-8-264.
- PINTO-CARRASCO, DANIEL; SCHEUNERT, AGNES; HEUBL, GÜNTHER; RICO, ENRIQUE; MARTÍNEZ-ORTEGA, M. MONTSERRAT (2017):**  
**Unravelling the Phylogeny of the root-hemiparasitic Genus *Odontites* (Tribe Rhinanthae, Orobanchaceae): Evidence for five main Lineages.**  
In: *Taxon* 66 (4), p. 886–908. DOI: 10.12705/664.6.
- PRADEEP, AYILLIATH K.; PRAMOD, CHOORAKKAY (2013):**  
***Parasopubia hofmannii* Pradeep & Pramod and *Parasopubia hofmannii* var. *albiflora* Pradeep & Pramod (Orobanchaceae), two new Taxa from India.**  
In: *Candollea* 68 (1), p. 115–122. DOI: 10.15553/c2013v681a16.
- RANDLE, CHRISTOPHER P.; WOLFE, ANDREA D. (2005):**  
**The Evolution and Expression of *Rbcl* in Holoparasitic Sister-genera *Harveya* and *Hyobanche* (Orobanchaceae)1.**

- In: *American Journal of Botany* 92 (9), p. 1575–1585.
- REE, RICHARD H. (2005):**  
**Phylogeny and the Evolution of Floral Diversity in *Pedicularis* (Orobanchaceae).**  
In: *International Journal of Plant Sciences* 166 (4), p. 595–613.
- RODRIGUES, ANUAR G.; COLWELL, ALISON E. L.; STEFANOVIĆ, SAŠA (2011):**  
**Molecular Systematics of the parasitic Genus *Conopholis* (Orobanchaceae) inferred from Plastid and nuclear Sequences.**  
In: *American Journal of Botany* 98 (5), p. 896–908. DOI: 10.3732/ajb.1000375.
- SCHEUNERT, AGNES; FLEISCHMANN, ANDREAS; OLANO-MARÍN, CATALINA; BRÄUCHLER, CHRISTIAN; HEUBL, GÜNTER (2012):**  
**Phylogeny of Tribe Rhinanthae (Orobanchaceae) with a Focus on Biogeography, Cytology and Re-examination of generic Concepts.**  
In: *Taxon* 61 (6), p. 1269–1285.
- SCHNEEWEISS, GERALD M.; COLWELL, ALISON E. L.; PARK, JEONG-MI; JANG, CHANG-GEE; STUESSY, TOD F. (2004):**  
**Phylogeny of holoparasitic *Orobanche* (Orobanchaceae) inferred from nuclear ITS Sequences.**  
In: *Molecular Phylogenetics and Evolution* 30 (2), p. 465–478. DOI: 10.1016/S1055-7903(03)00210-0.
- TANK, DAVID C.; EGGER, J. MARK; OLMSTEAD, RICHARD G. (2009):**  
**Phylogenetic Classification of Subtribe Castillejinae (Orobanchaceae).**  
In: *Systematic Botany* 34, p. 182–197.
- TANK, DAVID C.; OLMSTEAD, RICHARD G. (2008):**  
**From Annuals to Perennials: Phylogeny of Subtribe Castillejinae (Orobanchaceae).**  
In: *American Journal of Botany* 95 (5), p. 608–625. DOI: 10.3732/ajb.2007346.
- TANK, DAVID C.; OLMSTEAD, RICHARD G. (2009):**  
**The evolutionary Origin of a second Radiation of Annual *Castilleja* (Orobanchaceae) Species in South America: the role of long Distance Dispersal and Allopolyploidy.**  
In: *American Journal of Botany* 96 (10), p. 1907–1921. DOI: 10.3732/ajb.0800416.
- TKACH, NATALIA V.; REE, RICHARD H.; KUSS, PATRICK; RÖSER, MARTIN; HOFFMANN, MATTHIAS H. (2014):**  
**High mountain Origin, Phylogenetics, Evolution, and Niche Conservatism of arctic Lineages in the hemiparasitic Genus *Pedicularis* (Orobanchaceae).**  
In: *Molecular Phylogenetics and Evolution* 76, p. 75–92. DOI: 10.1016/j.ympev.2014.03.004.
- URIBE-CONVERS, SIMON; TANK, DAVID C. (2016):**  
**Phylogenetic Revision of the Genus *Bartsia* (Orobanchaceae): Disjunct Distributions correlate to independent Lineages.**  
In: *Systematic Botany* 41 (3), p. 672–684. DOI: 10.1600/036364416X692299.
- WANG, H.; MILL, ROBERT R.; BLACKMORE, P. (2003):**  
**Pollen Morphology and infra-generic evolutionary Relationships in some Chinese Species of *Pedicularis* (Scrophulariaceae).**  
In: *Plant Systematics and Evolution* 237 (1-2), p. 1–17. DOI: 10.1007/s00606-002-0188-y.
- WANG, HONG-JUAN; LI, WEI-TAO; LIU, YA-NAN; YANG, FU-SHENG; WANG, XIAO-QUAN (2015):**  
**Range-wide multilocus phylogenetic Analyses of *Pedicularis* Sect. *Cyathophora* (Orobanchaceae): Implications for Species Delimitation and Speciation.**  
In: *Taxon* 64 (5), p. 959–974. DOI: 10.12705/645.6.
- WANG, HONG-JUAN; LI, WEI-TAO; LIU, YA-NAN; YANG, FU-SHENG; WANG, XIAO-QUAN (2017):**

**Resolving interspecific Relationships within Evolutionarily young Lineages using RNA-Seq Data: An Example from *Pedicularis* Section *Cyathophora* (Orobanchaceae).**

In: *Molecular Phylogenetics and Evolution* 107, p. 345–355. DOI: 10.1016/j.ympev.2016.11.018.

**WEISS-SCHNEEWEISS, HANNA; GREILHUBER, JOHANN; SCHNEEWEISS, GERALD M. (2006):**

**Genome Size Evolution in Holoparasitic *Orobanche* (Orobanchaceae) and related Genera.**

In: *American Journal of Botany* 93 (1), p. 148–156.

**WU, MING-JOU; HUANG, TSENG-CHIENG (2004):**

**Taxonomy of the *Euphrasia transmorrisonensis* (Orobanchaceae) Complex in Taiwan based on nrITS.**

In: *Taxon* 53 (4), p. 911–918.

**YANG, F.-S.; WANG, X.-Q. (2007):**

**Extensive Length Variation in the cpDNA trnT-trnF Region of hemiparasitic *Pedicularis* and its phylogenetic Implications.**

In: *Plant Systematics and Evolution* 264 (3-4), p. 251–264. DOI: 10.1007/s00606-006-0510-1.

**YU, WEN-BIN; HUANG, PAN-HUI; LI, DE-ZHU; WANG, HONG (2013):**

**Incongruence between nuclear and Chloroplast DNA Phylogenies in *Pedicularis* Section *Cyathophora* (Orobanchaceae).**

In: *Public Library of Science One* 8 (9), e74828. DOI: 10.1371/journal.pone.0074828.

## Osmundaceae

**BOMFLEUR, BENJAMIN; GRIMM, GUIDO W.; MCLOUGHLIN, STEPHEN (2015):**

***Osmunda pulchella* sp. nov. from the Jurassic of Sweden - reconciling molecular and fossil Evidence in the Phylogeny of modern Royal Ferns (Osmundaceae).**

In: *BMC Evolutionary Biology* 15, p. 126. DOI: 10.1186/s12862-015-0400-7.

**METZGAR, JORDAN S.; SKOG, JUDITH E.; ZIMMER, ELIZABETH A.; PRYER, KATHLEEN M. (2008):**

**The Paraphyly of *Osmunda* is confirmed by phylogenetic Analyses of seven Plastid Loci.**

In: *Systematic Botany* 33 (1), p. 31–36.

## Oxalidaceae

**HEIBL, CHRISTOPH; RENNER, SUSANNE P. (2012):**

**Distribution models and a dated Phylogeny for Chilean *Oxalis* Species reveal occupation of new habitats by different Lineages, not rapid adaptive Radiation.**

In: *Systematic Biology* 61 (5), p. 823–834. DOI: 10.1093/sysbio/sys034.

**JOOSTE, MICHELLE; DREYER, LÉANNE L.; OBERLANDER, KENNETH C. (2016):**

**The phylogenetic Significance of Leaf anatomical Traits of southern African *Oxalis*.**

In: *BMC Evolutionary Biology* 16 (1), p. 225. DOI: 10.1186/s12862-016-0792-z.

**OBERLANDER, KENNETH C.; DREYER, LÉANNE L.; BELLSTEDT, DIRK U. (2011):**

**Molecular Phylogenetics and Origins of southern African *Oxalis*.**

In: *Taxon* 60 (6), p. 1667–1677. DOI: 10.1002/tax.606011.

**OBERLANDER, KENNETH C.; DREYER, LÉANNE L.; BELLSTEDT, DIRK U.; REEVES, GAIL (2004):**

**Systematic Relationships in southern African *Oxalis* L. (Oxalidaceae): Congruence between palynological and Plastid trnL-F Evidence.**

In: *Taxon* 53 (4), p. 977–985. DOI: 10.2307/4135564.

OBERLANDER, KENNETH C.; EMSWILLER, EVE; BELLSTEDT, DIRK U.; DREYER, L. L. (2009):

**A model of Bulb Evolution in the Eudicot Genus *Oxalis* (Oxalidaceae).**

In: *Molecular Phylogenetics and Evolution* 51 (1), p. 54–63. DOI: 10.1016/j.ympev.2008.11.022.

VAIO, MAGDALENA; GARDNER, ANDREW; EMSWILLER, EVE; GUERRA, MARCELO (2013):

**Molecular Phylogeny and Chromosome Evolution among the creeping herbaceous *Oxalis* Species of Sections *Corniculatae* and *Ripariae* (Oxalidaceae).**

In: *Molecular Phylogenetics and Evolution* 68 (2), p. 199–211. DOI: 10.1016/j.ympev.2013.03.019.

VAIO, MAGDALENA; GARDNER, ANDREW; SPERANZA, PABLO R.; EMSWILLER, EVE; GUERRA, MARCELO (2016):

**Phylogenetic and cytogenetic Relationships among Species of *Oxalis* Section *Articulatae* (Oxalidaceae).**

In: *Plant Systematics and Evolution* 302 (9), p. 1253–1265. DOI: 10.1007/s00606-016-1330-6.

## Paeoniaceae

HONG, DE-YUAN; ZHANG, DA-MING; WANG, XIAO-QUAN; KORUKLU, SELCUK TUGRUL; TZANOUDAKIS, DIMITRIS (2008):

**Relationships and Taxonomy of *Paeonia arietina* G. Anderson complex (Paeoniaceae) and its allies.**

In: *Taxon* 57 (3), p. 922–932.

PAN, JIN; ZHANG, DA-MING; SANG, TAO (2007):

**Molecular phylogenetic Evidence for the Origin of a diploid Hybrid of *Paeonia* (Paeoniaceae).**

In: *American Journal of Botany* 94 (3), p. 400–408.

TANK, DAVID C.; SANG, TAO (2001):

**Phylogenetic utility of the Glycerol-3-Phosphate Acyltransferase Gene: Evolution and Implications in *Paeonia* (Paeoniaceae).**

In: *Molecular Phylogenetics and Evolution* 19 (3), p. 421–429. DOI: 10.1006/mpev.2001.0931.

ZHANG, JIN-MEI; LÓPEZ-PUJOL, JORDI; GONG, XUN; WANG, HUA-FENG; VILATERSANA, ROSER; ZHOU, SHI-LIANG (2018):

**Population genetic dynamics of Himalayan-Hengduan Tree Paeonies, *Paeonia* Subsect. *Delavayanae*.**

In: *Molecular Phylogenetics and Evolution* 125, p. 62–77. DOI: 10.1016/j.ympev.2018.03.003.

ZHAO, XUAN; ZHOU, ZHI-QIN; QI-BING; PAN, LIN KAI-YU; LI, MING-YANG (2008):

**Phylogenetic Analysis of *Paeonia* Sect. *Moutan* (Paeoniaceae) based on multiple DNA fragments and morphological Data.**

In: *Journal of Systematics and Evolution* 46 (4), p. 563–572.

## Pandanaceae

BUERKI, SVEN; CALLMANDER, MARTIN W.; DEVEY, DION S.; CHAPPELL, LAUREN; GALLAHER, TIMOTHY; MUNZINGER, JÉRÔME ET AL. (2012):

**Straightening out the screw-pines: A first step in Understanding phylogenetic Relationships within Pandanaceae.**

In: *Taxon* 61 (5), p. 1010–1020.

CALLMANDER, MARTIN W.; BOOTH, THOMAS J.; BEENTJE, HENK; BUERKI, SVEN (2013):

**Update on the Systematics of *Benstonea* (Pandanaceae): When a visionary Taxonomist foresees phylogenetic Relationships.**

In: *Phytotaxa* 112 (2), p. 57. DOI: 10.11646/phytotaxa.112.2.4.

CALLMANDER, MARTIN W.; BUERKI, SVEN (2016):

**Two new threatened Species of *Benstonea* Callm. & Buerki (Pandanaceae) from Sabah (Borneo, Malaysia).**

In: *Candollea* 71 (2), p. 257–263. DOI: 10.15553/c2016v712a10.

**CALLMANDER, MARTIN W.; BUERKI, SVEN; KEIM, ARY P.R.Y.; PHILLIPSON, PETER B. (2014):**

**Notes on *Benstonea* (Pandanaceae) from the Islands of Halmahera, New Guinea and Sulawesi.**

In: *Phytotaxa* 175 (3), p. 161. DOI: 10.11646/phytotaxa.175.3.6.

**CALLMANDER, MARTIN W.; LOWRY, PORTER PRESCOTT; FOREST, FÉLIX; DEVEY, DION S.; BEENTJE, HENK; BUERKI, SVEN (2012):**

***Benstonea* Callm. & Buerki (Pandanaceae): Characterization, Circumscription, and Distribution of a new Genus of Screw-Pines, with a Synopsis of accepted Species.**

In: *Candollea* 67 (2), p. 323–345. DOI: 10.15553/c2012v672a12.

**GALLAHER, TIMOTHY; CALLMANDER, MARTIN W.; BUERKI, SVEN; KEELEY, STERLING C. (2015):**

**A long distance Dispersal Hypothesis for the Pandanaceae and the Origins of the *Pandanus tectorius* Complex.**

In: *Molecular Phylogenetics and Evolution* 83, p. 20–32. DOI: 10.1016/j.ympev.2014.11.002.

## **Pandanales**

**CADDICK, LIZABETH R.; RUDALL, PAULA J.; WILKIN, PAUL; HEDDERSON, TERRY A.; CHASE, MARK W. (2002):**

**Phylogenetics of Dioscoreales based on combined Analyses of morphological and molecular Data.**

In: *Botanical Journal of the Linnean Society* 138 (2), p. 123–144. DOI: 10.1046/j.1095-8339.2002.138002123.x.

**CADDICK, LIZABETH R.; WILKIN, PAUL; RUDALL, PAULA J.; HEDDERSON, TERRY A.; CHASE, MARK W. (2002):**

**Yams reclassified: a Recircumscription of Dioscoreaceae and Dioscoreales.**

In: *Taxon* 51 (1), p. 103–114. DOI: 10.2307/1554967.

## **Papaveraceae**

**CAROLAN, JAMES C.; HOOK, INGRID L. I.; CHASE, MARK W.; KADEREIT, JOACHIM W.; HODKINSON, TREVOR R. (2006):**

**Phylogenetics of Papaver and related Genera based on DNA Sequences from ITS nuclear ribosomal DNA and Plastid trnL Intron and trnL-F intergenic Spacers.**

In: *Annals of Botany* 98 (1), p. 141–155. DOI: 10.1093/aob/mcl079.

**GÜRKÖK, TUGBA; KAYMAK, ELIF; BOZTEPE, GÜLSEN; KOYUNCU, MESUT; PARMAKSIZ, ISKENDER (2013):**

**Molecular characterization of the Genus *Papaver* Gülsen Section *Oxytona* using ISSR Markers.**

In: *Turkish Journal of Botany* 37, p. 644–650. DOI: 10.3906/bot-1208-16.

**LI, JIAN-HUA; MURRAY, K. GREGORY; LI, PAN; BROWN, KENNETH (2018):**

**Differential Diversifications of South American and Eastern Asian disjunct Genera *Bocconia* and *Macleaya* (Papaveraceae).**

In: *Journal of Systematics and Evolution* 56 (1), p. 25–34. DOI: 10.1111/jse.12286.

**ZHANG, ZHONG-XIN; WANG, DONG; YANG, XUE (2016):**

**The taxonomic Position of *Corydalis parviflora* Su & Lidén (Papaveraceae), a genetically distinct species: Evidence from cpDNA and nDNA Sequences.**

In: *Biochemical Systematics and Ecology* 67, p. 134–141. DOI: 10.1016/j.bse.2016.06.003.

## **Passifloraceae**

**HEARN, DAVID J. (2006):**

***Adenia* (Passifloraceae) and its Adaptive Radiation: Phylogeny and Growth Form Diversification.**

In: Systematic Botany 31 (4), p. 805–821.

**KROSNICK, SHAWN E.; FORD, ANDREW J.; FREUDENSTEIN, JOHN V. (2009):**

**Taxonomic Revision of *Passiflora* Subgenus *Tetrapathea* Including the Monotypic Genera *Hollrungia* and *Tetrapathea* (Passifloraceae), and a new Species of *Passiflora*.**

In: Systematic Botany 34 (2), p. 375–385. DOI: 10.1600/036364409788606343.

**MILWARD-DE-AZEVEDO, MICHAEL ALVIM; BAUMGRATZ, JOSÉ FERNANDO A.; GONÇALVES-ESTEVEZ, VÂNIA (2012):**  
**A taxonomic Revision of *Passiflora* Subgenus *Decaloba* (Passifloraceae) in Brazil.**

In: Phytotaxa 53, p. 1–68.

**MUSCHNER, VALÉRIA C.; LORENZ, ALINE P.; CERVI, ARMANDO C.; BONATTO, SANDRO LUIS; SOUZA-CHIES, TATIANA TEIXEIRA DE; SALZANO, FRANCISCO M.; FREITAS, LORETA BRANDÃO (2003):**

**A first molecular phylogenetic Analysis of *Passiflora* (Passifloraceae).**

In: American Journal of Botany 90 (8), p. 1229–1238.

**PECCOUD, JEAN; PIATSCHKE, FINN; YOCKTENG, ROXANA; GARCIA, MARJORIE; SAUVE, MATHIEU; DJIÉTO-LORDON, CHAMPLAIN ET AL. (2013):**

**Multi-locus Phylogenies of the Genus *Barteria* (Passifloraceae) portray complex Patterns in the Evolution of Myrmecophytism.**

In: Molecular Phylogenetics and Evolution 66 (3), p. 824–832. DOI: 10.1016/j.ympev.2012.11.006.

**PIGNAL, MARC; YOCKTENG, ROXANA; HEARN, DAVID J.; LABAT, JEAN-NOEL (2013):**

***Adenia barthelatii* (Passifloraceae), a new endemic Species of Mayotte and its phylogenetic Status within the Genus *Adenia*.**

In: Phytotaxa 99 (1), p. 40. DOI: 10.11646/phytotaxa.99.1.3.

**TOKUOKA, TORU (2012):**

**Molecular phylogenetic Analysis of Passifloraceae sensu lato (Malpighiales) based on Plastid and nuclear DNA Sequences.**

In: Journal of Plant Research 125 (4), p. 489–497. DOI: 10.1007/s10265-011-0472-4.

**YOCKTENG, ROXANA; NADOT, SOPHIE (2004):**

**Infrageneric Phylogenies: a Comparison of chloroplast-expressed glutamine Synthetase, cytosol-expressed Glutamine Synthetase and cpDNA Maturase K in *Passiflora*.**

In: Molecular Phylogenetics and Evolution 31 (1), p. 397–402. DOI: 10.1016/S1055-7903(03)00276-8.

**YOCKTENG, ROXANA; NADOT, SOPHIE (2004):**

**Phylogenetic Relationships among *Passiflora* Species based on the Glutamine Synthetase nuclear Gene expressed in Chloroplast (ncpGS).**

In: Molecular Phylogenetics and Evolution 31 (1), p. 379–396. DOI: 10.1016/S1055-7903(03)00277-X.

## **Paulowniaceae**

**ZHOU, QING-MEI; JENSEN, SØREN ROSENDAL; LIU, GUO-LI; WANG, SHUANG; LI, HONG-QING (2014):**

**Familial Placement of *Wightia* (Lamiales).**

In: Plant Systematics and Evolution 300 (9), p. 2009–2017. DOI: 10.1007/s00606-014-1029-5.

## **Pedaliaceae**

**GORMLEY, INGEBORG C.; BEDIGIAN, DOROTHEA; OLMSTEAD, RICHARD G. (2015):**

**Phylogeny of Pedaliaceae and Martyniaceae and the Placement of *Trapella* in Plantaginaceae s. l.**

In: Systematic Botany 40 (1), p. 259–268. DOI: 10.1600/036364415X686558.

**Penaecaceae**

**ONSTEIN, RENSKÉ E.; CARTER, RICHARD J.; XING, YAOWU; LINDER, HANS PETER (2014):**

**Diversification Rate Shifts in the Cape Floristic Region: the right Traits in the right Place at the right Time.**

In: Perspectives in Plant Ecology, Evolution and Systematics 16 (6), p. 331–340. DOI: 10.1016/j.ppees.2014.08.002.

**SCHÖNENBERGER, JÜRGEN; CONTI, ELENA (2003):**

**Molecular Phylogeny and Floral Evolution of Penaecaceae, Oliniaceae, Rhynchocalycaceae, and Alzateaceae (Myrtales).**

In: American Journal of Botany 90 (2), p. 293–309. DOI: 10.3732/ajb.90.2.293.

**Peridiscaceae**

**SOLTIS, DOUGLAS E.; CLAYTON, JOSHUA W.; DAVIS, CHARLES C.; GITZENDANNER, MATTHEW A.; CHEEK, MARTIN R.; SAVOLAINEN, VINCENT ET AL. (2007):**

**Monophyly and Relationships of the enigmatic Family Peridiscaceae.**

In: Taxon 56 (1), p. 65–73.

**Petenaecaceae**

**CHRISTENHUSZ, MAARTEN J.M.; FAY, MICHAEL F.; CLARKSON, JAMES J.; GASSON, PETER E.; MORALES CAN, JULIO; JIMÉNEZ BARRIOS, JORGE B.; CHASE, MARK W. (2010):**

**Petenaecaceae, a new Angiosperm Family in Huerteales with a distant Relationship to *Gerrardina* (Gerrardinaceae).**

In: Botanical Journal of the Linnean Society 164 (1), p. 16–25. DOI: 10.1111/j.1095-8339.2010.01074.x.

**Philydraceae**

**SAARELA, JEFFERY M.; PRENTIS, PETER J.; RAI, HARDEEP S.; GRAHAM, SEAN W. (2008):**

**Phylogenetic Relationships in the Monocot Order Commelinales, with a focus on Philydraceae.**

In: Botany 86 (7), p. 719–731. DOI: 10.1139/B08-063.

**Phrymaceae**

**BARKER, WILLIAM R.; NESOM, GUY L.; BEARDSLEY, PAUL M.; FRAGA., N. P. (2012):**

**A taxonomic Conspectus of Phrymaceae: A narrowed Circumscriptions for *Mimulus*, new and resurrected Genera, and new Names and Combinations.**

In: Phytoneuron 39, p. 1–60.

**BEARDSLEY, PAUL M.; BAKER, WILLIAM R. (2005):**

**Patterns of Evolution in Australian *Mimulus* and related Genera (Phrymaceae~Scrophulariaceae): a molecular Phylogeny using Chloroplast and nuclear Sequence Data.**

In: Australian Systematic Botany 18, p. 61–73.

**BEARDSLEY, PAUL M.; SCHOENIG, STEVE E.; WHITTALL, JUSTEN B.; OLMSTEAD, RICHARD G. (2004):**

**Patterns of Evolution in Western North American *Mimulus* (Phrymaceae).**

In: American Journal of Botany 91 (3), p. 474–489.

**LES, DONALD H.; CAPERS, ROBERT P. (2006):**

**Introduction of *Glossostigma* (Phrymaceae) to North America: A taxonomic and Ecological Overview.**

In: American Journal of Botany 93 (6), p. 927–939.

**NESOM, GUY L. (2014):**

**Updated Classification and hypothetical Phylogeny of *Erythranthe* Sect. *Simiola* (Phrymaceae).**

In: Phytoneuron 81, p. 1–6.

**NIE, ZE-LONG; SUN, HANG; BEARDSLEY, PAUL M.; OLMSTEAD, RICHARD G. (2006):**

**Evolution of Biogeographic Disjunction between Eastern Asia and Eastern North America in *Phryma* (Phrymaceae).**

In: American Journal of Botany 93 (9), p. 1343–1356.

## **Phyllanthaceae**

**CHALLEN, GILL; VORONTSOVA, MARIA S.; SCHNEIDER, HARALD; CHEEK, MARTIN R. (2011):**

**Phylogenetically distinct and critically Endangered new Tree Species of *Phyllanthus* from Cameroon (Phyllanthaceae, Euphorbiaceae s. l.).**

In: Systematic Botany 36 (4), p. 933–938. DOI: 10.1600/036364411X604949.

**KATHRIARACHCHI, HASHENDRA; HOFFMANN, PETRA; SAMUEL, ROSABELLE; WURDACK, KENNETH J.J.; CHASE, MARK W. (2005):**

**Molecular Phylogenetics of Phyllanthaceae inferred from five Genes (plastid *atpB*, *matK*, 3'*ndhF*, *rbcl*, and nuclear *Phyc*).**

In: Molecular Phylogenetics and Evolution 36 (1), p. 112–134. DOI: 10.1016/j.ympev.2004.12.002.

**KATHRIARACHCHI, HASHENDRA; SAMUEL, ROSABELLE; HOFFMANN, PETRA; MLINAREC, JELENA; WURDACK, KENNETH J.J.; RALIMANANA, HÉLÈNE ET AL. (2006):**

**Phylogenetics of Tribe Phyllantheae (Phyllanthaceae; Euphorbiaceae sensu lato) based on nrITS and Plastid *matK* DNA Sequence Data.**

In: American Journal of Botany 93 (4), p. 637–655. DOI: 10.3732/ajb.93.4.637.

**MANISSORN, JUTHATIP; SUKRONG, SUCHADA; RUANGRUNGSI, NIJSIRI; MIZUKAMI, HAJIME (2010):**

**Molecular phylogenetic Analysis of *Phyllanthus* Species in Thailand and the Application of Polymerase Chain Reaction-Restriction Fragment Length Polymorphism for *Phyllanthus amarus* Identification.**

In: Biological and Pharmaceutical Bulletin 33 (10), p. 1723–1727. DOI: 10.1248/bpb.33.1723.

**PRUESAPAN, KANCHANA; TELFORD, IAN R.H.; BRUHL, JEREMY J.; DRAISMA, STEFANO G. A.; VAN WELZEN, PETER C. (2008):**

**Delimitation of *Sauropus* (Phyllanthaceae) based on Plastid *matK* and nuclear ribosomal ITS DNA Sequence Data.**

In: Annals of Botany 102 (6), p. 1007–1018. DOI: 10.1093/aob/mcn193.

**PRUESAPAN, KANCHANA; TELFORD, IAN R.H.; BRUHL, JEREMY J.; VAN WELZEN, PETER C. (2012):**

**Phylogeny and proposed Circumscription of *Breynia*, *Sauropus* and *Synostemon* (Phyllanthaceae), based on Chloroplast and nuclear DNA Sequences.**

In: Australian Systematic Botany 25 (5), p. 313–330. DOI: 10.1071/SB11005.

**SAMUEL, ROSABELLE; KATHRIARACHCHI, HASHENDRA; HOFFMANN, PETRA; BARFUSS, MICHAEL H. J.; WURDACK, KENNETH J.J.; DAVIS, CHARLES C.; CHASE, MARK W. (2005):**

**Molecular Phylogenetics of Phyllanthaceae: Evidence from Plastid *matK* and Nuclear *Phyc* Sequences.**

In: American Journal of Botany 92 (1), p. 132–141.



TELFORD, IAN R.H.; PRUESAPAN, KANCHANA; VAN WELZEN, PETER C.; BRUHL, JEREMY J. (2014):

**Molecular Data consistently recover a 'Queensland Clade' of *Synostemon* Phyllanthaceae, Phyllanthaeae) with distinctive Floral Morphology.**

In: Australian Systematic Botany 27 (6), p. 450–461. DOI: 10.1071/SB14034.

TELFORD, IAN R.H.; PRUESAPAN, KANCHANA; VAN WELZEN, PETER C.; BRUHL, JEREMY J. (2016):

**Morphological and molecular Data show *Synostemon trachyspermus* (Phyllanthaceae, Phyllanthaeae) to be a heterogeneous Species Assemblage.**

In: Australian Systematic Botany 29 (3), p. 218–234. DOI: 10.1071/SB16008.

VAN WELZEN, PETER C.; PRUESAPAN, KANCHANA; TELFORD, IAN R.H.; ESSER, HANS-JOACHIM; BRUHL, J. J. (2014):

**Phylogenetic Reconstruction prompts taxonomic Changes in *Sauropus*, *Synostemon* and *Breynia* (Phyllanthaceae Tribe Phyllanthaeae).**

In: Blumea 59 (2), p. 77–94. DOI: 10.3767/000651914X684484.

VORONTSOVA, MARIA S.; HOFFMANN, PETRA (2008):

**A phylogenetic Classification of Tribe Poranthereae (Phyllanthaceae, Euphorbiaceae sensu lato).**

In: Kew Bulletin 63 (1), p. 41–59. DOI: 10.1007/s12225-007-9012-8.

VORONTSOVA, MARIA S.; HOFFMANN, PETRA; MAURIN, OLIVIER; CHASE, MARK W. (2007):

**Molecular Phylogenetics of Tribe Poranthereae (Phyllanthaceae; Euphorbiaceae sensu lato).**

In: American Journal of Botany 94 (12), p. 2026–2040. DOI: 10.3732/ajb.94.12.2026.

WEBSTER, GRADY L.; CARPENTER, KEVIN J. (2008):

**Pollen Morphology and Systematics of palaeotropical *Phyllanthus* and related Genera of Subtribe Phyllanthinae (Euphorbiaceae).**

In: Botanical Journal of the Linnean Society 157 (4), p. 591–608. DOI: 10.1111/j.1095-8339.2008.00781.x.

WURDACK, KENNETH J.J.; HOFFMANN, PETRA; SAMUEL, ROSABELLE; BRUIJN, ANETTE D.E.; VAN DER BANK, MICHELLE; CHASE, MARK W. (2004):

**Molecular phylogenetic Analysis of Phyllanthaceae (Phyllanthoideae pro parte, Euphorbiaceae sensu lato) using Plastid RbcL DNA Sequences.**

In: American Journal of Botany 91 (11), p. 1882–1900.

YAO, GANG; ZHANG, DIAN-XIANG (2016):

**Pollen Morphology of Chinese *Glochidion* (Phyllanthaceae) and its taxonomic Implications.**

In: Nordic Journal of Botany 34 (1), p. 102–110. DOI: 10.1111/njb.00912.

## Phytolaccaceae

ALI, M. AJMAL; LEE, JOONGKU; KIM, SOO-YOUNG; PARK, SANG-HONG; AL-HEMAID, FAHAD M.A. (2015):

**Molecular phylogenetic Analyses of Internal Transcribed Spacer (ITS) Sequences of nuclear ribosomal DNA indicate Monophyly of the Genus *Phytolacca* L. (Phytolaccaceae).**

In: Bangladesh Journal of Plant Taxonomy 22 (1), p. 1–8.

LEE, J.; KIM, P. Y.; PARK, SANG-HONG; ALI, M. AJMAL (2013):

**Molecular phylogenetic Relationships among Members of the Family Phytolaccaceae sensu lato inferred from Internal Transcribed Spacer Sequences of nuclear ribosomal DNA.**

In: Genetics and molecular Research 12 (4), p. 4515–4525. DOI: 10.4238/2013.February.28.15.

MEIRELLES, JULIA (2016):

**Flora das cangas da Serra dos Carajás, Pará, Brasil: Phytolaccaceae.**

In: *Rodriguésia* 67 (5spe), p. 1443–1445. DOI: 10.1590/2175-7860201667545.

SCHÄFERHOFF, BASTIAN; MÜLLER, KAI F.; BORSCH, THOMAS (2009):

**Caryophyllales Phylogenetics: disentangling Phytolaccaceae and Molluginaceae and Description of Microteaceae as a new isolated Family.**

In: *Willdenowia* 39 (2), p. 209–228. DOI: 10.3372/wi.39.39201.

## Picramniales

LOGACHEVA, MARIA D.; SHIPUNOV, ALEXEY B. (2017):

**Phylogenomic Analysis of *Picramnia*, *Alvaradoa*, and *Leitneria* supports the independent Picramniales.**

In: *Journal of Systematics and Evolution* 55 (3), p. 171–176. DOI: 10.1111/jse.12246.

## Picrodendraceae

SUTTER, D. MERINO; FORSTER, PAUL I.; ENDRESS, PETER K. (2006):

**Female flowers and systematic Position of Picrodendraceae (Euphorbiaceae s.l., Malpighiales).**

In: *Plant Systematics and Evolution* 261 (1-4), p. 187–215. DOI: 10.1007/s00606-006-0414-0.

## Pinaceae

AGUIRRE-PLANTER, ERIKA; JARAMILLO-CORREA, JUAN P.; GÓMEZ-ACEVEDO, SANDRA; KHASA, DAMASE P.; BOUSQUET, JEAN; EGUIARTE, LUIS E. (2012):

**Phylogeny, Diversification rates and Species boundaries of Mesoamerican Firs (*Abies*, Pinaceae) in a genus-wide Context.**

In: *Molecular Phylogenetics and Evolution* 62 (1), p. 263–274. DOI: 10.1016/j.ympev.2011.09.021.

CAMPBELL, CHRISTOPHER S.; WRIGHT, WESLEY A.; COX, MARGARET; VINING, THOMAS F.; MAJOR, C. SMOOT; ARSENAULT, MATTHEW P. (2005):

**Nuclear ribosomal DNA Internal Transcribed Spacer 1 (ITS1) in *Picea* (Pinaceae): Sequence Divergence and Structure.**

In: *Molecular Phylogenetics and Evolution* 35 (1), p. 165–185. DOI: 10.1016/j.ympev.2004.11.010.

ECKERT, ANDREW J.; HALL, BENJAMIN D. (2006):

**Phylogeny, historical Biogeography, and Patterns of Diversification for *Pinus* (Pinaceae): phylogenetic Tests of fossil-based Hypotheses.**

In: *Molecular Phylogenetics and Evolution* 40 (1), p. 166–182. DOI: 10.1016/j.ympev.2006.03.009.

FLORES-RENTERÍA, LLUVIA; WEGIER, ANA; ORTEGA DEL VECCHYO, DIEGO; ORTÍZ-MEDRANO, ALEJANDRA; PIÑERO, DANIEL; WHIPPLE, AMY V. ET AL. (2013):

**Genetic, morphological, geographical and ecological approaches reveal phylogenetic Relationships in complex Groups, an Example of recently diverged Pinyon Pine Species (Subsection *Cembroides*).**

In: *Molecular Phylogenetics and Evolution* 69 (3), p. 940–949. DOI: 10.1016/j.ympev.2013.06.010.

GERNANDT, DAVID S.; HERNÁNDEZ-LEÓN, SERGIO; SALGADO-HERNÁNDEZ, ESMERALDA; LA PÉREZ DE ROSA, JORGE A. (2009):

**Phylogenetic Relationships of *Pinus* Subsection *Ponderosae* inferred from Rapidly Evolving cpDNA Regions.**

In: *Systematic Botany* 34 (3), p. 481–491. DOI: 10.1600/036364409789271290.

GERNANDT, DAVID S.; LISTON, AARON; PIÑERO, DANIEL (2001):

**Variation in the nrDNA ITS of *Pinus* subsection *Cembroides*: Implications for molecular systematic studies of pine Species Complexes.**

In: *Molecular Phylogenetics and Evolution* 21 (3), p. 449–467. DOI: 10.1006/mpev.2001.1026.

**GERNANDT, DAVID S.; LÓPEZ, GRETEL GEADA; GARCÍA, SOL ORTIZ; LISTON, AARON (2005):**

**Phylogeny and Classification of *Pinus*.**

In: *Taxon* 54 (1), p. 29–42. DOI: 10.2307/25065300.

**GRIVET, DELPHINE; CLIMENT, JOSÉ; ZABAL-AGUIRRE, MARIO; NEALE, DAVID B.; VENDRAMIN, GIOVANNI G.; GONZÁLEZ-MARTÍNEZ, SANTIAGO C. (2013):**

**Adaptive Evolution of Mediterranean Pines.**

In: *Molecular Phylogenetics and Evolution* 68 (3), p. 555–566. DOI: 10.1016/j.ympev.2013.03.032.

**GUGERLI, FELIX; SPERISEN, C.; BÜCHLER, U.; BRUNNER, I.; BRODBECK, SABINE; PALMER, JEFFREY D.; QIU, Y.-L. (2001):**

**The evolutionary split of Pinaceae from other conifers: Evidence from an Intron Loss and a multigene Phylogeny.**

In: *Molecular Phylogenetics and Evolution* 21 (2), p. 167–175. DOI: 10.1006/mpev.2001.1004.

**HAO, ZHEN-ZHEN; LIU, YAN-YAN; NAZAIRE, MARE; WEI, XIAO-XIN; WANG, XIAO-QUAN (2015):**

**Molecular Phylogenetics and evolutionary History of Sect. *Quinquifoliae* (*Pinus*): Implications for Northern Hemisphere Biogeography.**

In: *Molecular Phylogenetics and Evolution* 87, p. 65–79. DOI: 10.1016/j.ympev.2015.03.013.

**HAVILL, NATHAN P.; CAMPBELL, CHRISTOPHER S.; VINING, THOMAS F.; LE PAGE, BEN; BAYER, RANDALL J.; DONOGHUE, MICHAEL J. (2008):**

**Phylogeny and Biogeography of *Tsuga* (Pinaceae) inferred from Nuclear Ribosomal ITS and Chloroplast DNA Sequence Data.**

In: *Systematic Botany* 33 (3), p. 478–489.

**KAN, XIAN-ZHAO; WANG, SHAN-SHAN; DING, XIN; WANG, XIAO-QUAN (2007):**

**Structural Evolution of nrDNA ITS in Pinaceae and its phylogenetic Implications.**

In: *Molecular Phylogenetics and Evolution* 44 (2), p. 765–777. DOI: 10.1016/j.ympev.2007.05.004.

**KAUNDUN, SHIV SHANKHAR; LEBRETON, PHILIPPE (2010):**

**Taxonomy and Systematics of the Genus *Pinus* based on morphological, biogeographical and biochemical Characters.**

In: *Plant Systematics and Evolution* 284 (1-2), p. 1–15. DOI: 10.1007/s00606-009-0228-y.

**LOCKWOOD, JARED D.; ALEKSIĆ, JELENA M.; ZOU, JIABIN; WANG, JING; LIU, JIAN-QUAN; RENNER, SUSANNE P. (2013):**

**A new Phylogeny for the Genus *Picea* from plastid, mitochondrial, and nuclear Sequences.**

In: *Molecular Phylogenetics and Evolution* 69 (3), p. 717–727. DOI: 10.1016/j.ympev.2013.07.004.

**PARKS, MATTHEW; CRONN, RICHARD C.; LISTON, AARON (2012):**

**Separating the Wheat from the Chaff: Mitigating the Effects of Noise in a Plastome phylogenomic Data Set from *Pinus* L. (Pinaceae).**

In: *BMC Evolutionary Biology* 12, p. 100. DOI: 10.1186/1471-2148-12-100.

**POTENKO, V. V. (2007):**

**Relationships among Spruces (*Picea* A.Dietr., Pinaceae) of the Russian Far East.**

In: *Plant Systematics and Evolution* 268 (1-4), p. 1–13. DOI: 10.1007/s00606-007-0551-0.

**QIAO, CAI-YUAN; RAN, JIN-HUA; LI, YAN; WANG, XIAO-QUAN (2007):**

**Phylogeny and Biogeography of *Cedrus* (Pinaceae) inferred from Sequences of seven paternal Chloroplast and maternal mitochondrial DNA Regions.**

In: *Annals of Botany* 100 (3), p. 573–580. DOI: 10.1093/aob/mcm134.

**RAN, JIN-HUA; WEI, XIAO-XIN; WANG, XIAO-QUAN (2006):**

**Molecular Phylogeny and Biogeography of *Picea* (Pinaceae): Implications for phylogeographical studies using cytoplasmic Haplotypes.**

In: *Molecular Phylogenetics and Evolution* 41 (2), p. 405–419. DOI: 10.1016/j.ympev.2006.05.039.

**SEMERIKOV, VLADIMIR L.; ZHANG, HENGQING; SUN, MEI; LASCOUX, MARTIN (2003):**

**Conflicting Phylogenies of *Larix* (Pinaceae) based on cytoplasmic and nuclear DNA.**

In: *Molecular Phylogenetics and Evolution* 27 (2), p. 173–184. DOI: 10.1016/S1055-7903(02)00447-5.

**SEMERIKOVA, P. A.; SEMERIKOV, VLADIMIR L. (2014):**

**Molecular phylogenetic Analysis of the Genus *Abies* (Pinaceae) based on the nucleotide Sequence of Chloroplast DNA.**

In: *Russian Journal of Genetics* 50 (1), p. 7–19. DOI: 10.1134/S1022795414010104.

**SUYAMA, Y.; YOSHIMARU, HIROSHI; TSUMURA, YOSHIHIKO (2000):**

**Molecular phylogenetic Position of Japanese *Abies* (Pinaceae) based on Chloroplast DNA Sequences.**

In: *Molecular Phylogenetics and Evolution* 16 (2), p. 271–277. DOI: 10.1006/mpev.2000.0795.

**SYRING, JOHN; WILLYARD, ANN; CRONN, RICHARD C.; LISTON, AARON (2005):**

**Evolutionary Relationships among *Pinus* (Pinaceae) Subsections inferred from Multiple Low-copy Nuclear Loci.**

In: *American Journal of Botany* 92 (12), p. 2086–2100.

**WANG, BAOSHENG; WANG, XIAO-RU (2014):**

**Mitochondrial DNA capture and Divergence in *Pinus* provide new Insights into the Evolution of the Genus.**

In: *Molecular Phylogenetics and Evolution* 80, p. 20–30. DOI: 10.1016/j.ympev.2014.07.014.

**WANG, XIAO-QUAN; HAN, YING; HONG, DE-YUAN (1998):**

**A molecular Systematic Study of *Cathaya*, a relic Genus of the Pinaceae in China.**

In: *Plant Systematics and Evolution* 213, p. 165–172.

**WANG, XIAO-RU; TSUMURA, YOSHIHIKO; YOSHIMARU, HIROSHI; NAGASAKA, KAZUTOSHI; SCHMIDT, ALFRED E. (1999):**  
**Phylogenetic Relationships of Eurasian Pines (*Pinus*, Pinaceae) based on Chloroplast Rbcl, Matk, Rpl20-rps18 Spacer, and Trnv Intron Sequences.**

In: *American Journal of Botany* 86 (12), p. 1742–1753.

**WEI, X.-X.; WANG, X.-Q. (2003):**

**Phylogenetic split of *Larix* : Evidence from paternally inherited cpDNA trnT-trnF Region.**

In: *Plant Systematics and Evolution* 239 (1-2), p. 67–77. DOI: 10.1007/s00606-002-0264-3.

**WEI, XIAO-XIN; WANG, XIAO-QUAN (2004):**

**Evolution of 4-coumarate: Coenzyme A Ligase (4cl) Gene and Divergence of *Larix* (Pinaceae).**

In: *Molecular Phylogenetics and Evolution* 31 (2), p. 542–553. DOI: 10.1016/j.ympev.2003.08.015.

**WEI, XIAO-XIN; YANG, ZU-YU; LI, YAN; WANG, XIAO-QUAN (2010):**

**Molecular Phylogeny and Biogeography of *Pseudotsuga* (Pinaceae): Insights into the floristic Relationship between Taiwan and its adjacent Areas.**

In: *Molecular Phylogenetics and Evolution* 55 (3), p. 776–785. DOI: 10.1016/j.ympev.2010.03.007.

**XIANG, QIAO-PING; WEI, RAN; SHAO, YI-ZHEN; YANG, ZU-YU; WANG, XIAO-QUAN; ZHANG, XIAN-CHUN (2015):**

**Phylogenetic Relationships, possible ancient Hybridization, and biogeographic History of *Abies* (Pinaceae) based on Data from nuclear, plastid, and mitochondrial Genomes.**

In: Molecular Phylogenetics and Evolution 82 Pt A, p. 1–14. DOI: 10.1016/j.ympev.2014.10.008.

**XIANG, QIAO-PING; XIANG, QIU-YUN; GUO, YAN-YAN; ZHANG, XIAN-CHUN (2009):**

**Phylogeny of *Abies* (Pinaceae) inferred from nrITS Sequence Data.**

In: Taxon 58 (1), p. 141–152.

**XIANG, QIAO-PING; XIANG, QIU-YUN; LISTON, AARON; ZHANG, XIAN-CHUN (2004):**

**Phylogenetic Relationships in *Abies* (Pinaceae): Evidence from Pcr-rflp of the nuclear ribosomal DNA Internal Transcribed Spacer Region.**

In: Botanical Journal of the Linnean Society 145, p. 425–435.

**XIE, QING; LIU, ZHI-HONG; WANG, SHU-HUI; LI, ZHOU-QI (2015):**

**Genetic Diversity and phylogenetic Relationships among five endemic *Pinus* Taxa (Pinaceae) of China as revealed by Srap Markers.**

In: Biochemical Systematics and Ecology 62, p. 115–120. DOI: 10.1016/j.bse.2015.08.005.

**ZHANG, HONG-XIANG; ZHANG, MING-LI; WILLIAMS, DAVID M. (2014):**

**Genetic Evidence and Species Distribution modelling reveal the response of *Larix sibirica* and its related Species to Quaternary climatic and ancient historical Events.**

In: Biochemical Systematics and Ecology 54, p. 316–325. DOI: 10.1016/j.bse.2014.02.017.

## **Piperaceae**

**HORNER, HARRY T.; WANKE, STEFAN; SAMAIN, MARIE-STÉPHANIE (2009):**

**Evolution and Systematic Value of Leaf Crystal Macropatterns in the Genus *Peperomia* (Piperaceae).**

In: International Journal of Plant Sciences 170 (3), p. 343–354. DOI: 10.1086/596338.

**JARAMILLO, M. ALEJANDRA; CALLEJAS, RICARDO; DAVIDSON, CHRISTOPHER; SMITH, JAMES F.; STEVENS, ANGELA C.; TEPE, ERIC J. (2008):**

**A Phylogeny of the Tropical Genus *Piper* using ITS and the Chloroplast Intron psbJ–petA.**

In: Systematic Botany 33 (4), p. 647–660. DOI: 10.1600/036364408786500244.

**JARAMILLO, M. ALEJANDRA; MANOS, PAUL P. (2001):**

**Phylogeny and Patterns of Floral Diversity in the Genus *Piper* (Piperaceae).**

In: American Journal of Botany 88 (4), p. 706–716. DOI: 10.2307/2657072.

**MAI, PATRICIA; ROSSADO, ANDRÉS; BONIFACINO, JOSÉ MAURICIO; WAECHTER, JORGE LUIZ (2016):**

**Taxonomic Revision of *Peperomia* (Piperaceae) from Uruguay.**

In: Phytotaxa 244 (2), p. 125. DOI: 10.11646/phytotaxa.244.2.2.

**MOLINA-HENAO, Y. FRANCHESCO; GUERRERO-CHACÓN, ADRIANA L.; JARAMILLO, M. ALEJANDRA (2016):**

**Ecological and Geographic Dimensions of Diversification in *Piper* Subgenus *Otonia*: A Lineage of Neotropical Rainforest Shrubs.**

In: Systematic Botany 41 (2), p. 253–262. DOI: 10.1600/036364416X691777.

**NAUMANN, JULIA; SYMMANK, LARS; SAMAIN, MARIE-STÉPHANIE; MÜLLER, KAI F.; NEINHUIS, CHRISTOPH; DEPAMPHILIS, CLAUDE W.; WANKE, STEFAN (2011):**

**Chasing the Hare - Evaluating the phylogenetic Utility of a nuclear Single copy Gene Region at and below Species level within the Species rich Group *Peperomia* (Piperaceae).**

In: BMC Evolutionary Biology 11, p. 357. DOI: 10.1186/1471-2148-11-357.

**SAMAIN, MARIE-STÉPHANIE; MATHIEU, GUIDO; WANKE, STEFAN; NEINHUIS, CHRISTOPH; GOETGHEBEUR, PAUL (2008):  
*Verhuellia* revisited - unravelling its intricate taxonomic History and a new  
subfamilial Classification of Piperaceae.**

In: Taxon 57 (2), p. 583–587.

**SAMAIN, MARIE-STÉPHANIE; VRIJDAGHS, ALEXANDER; HESSE, MICHAEL; GOETGHEBEUR, PAUL; JIMÉNEZ RODRÍGUEZ,  
FRANCISCO; STOLL, ALEXANDRA ET AL. (2010):**

***Verhuellia* is a segregate Lineage in Piperaceae: more Evidence from Flower, Fruit  
and Pollen Morphology, Anatomy and Development.**

In: Annals of Botany 105 (5), p. 677–688. DOI: 10.1093/aob/mcq031.

**WANKE, STEFAN; SAMAIN, MARIE-STÉPHANIE; VANDERSCHAEVE, L.; MATHIEU, GUIDO; GOETGHEBEUR, PAUL; NEINHUIS,  
C. (2006):**

**Phylogeny of the Genus *Peperomia* (Piperaceae) inferred from the trnK/matK Region  
(cpDNA).**

In: Plant Biology 8 (1), p. 93–102. DOI: 10.1055/s-2005-873060.

## Piperales

**JARAMILLO, M. ALEJANDRA; KRAMER, ELENA M. (2007):**

**Molecular Evolution of the Petal and Stamen Identity Genes, *Apetala3* and *Pistillata*,  
after Petal Loss in the Piperales.**

In: Molecular Phylogenetics and Evolution 44 (2), p. 598–609. DOI: 10.1016/j.ympev.2007.03.015.

**TRUEBA, SANTIAGO; ROWE, NICK P.; NEINHUIS, CHRISTOPH; WANKE, STEFAN; WAGNER, SARAH T.; ISNARD, SANDRINE  
(2015):**

**Stem Anatomy and the Evolution of Woodiness in Piperales.**

In: International Journal of Plant Sciences 176 (5), p. 468–485. DOI: 10.1086/680595.

**WANKE, STEFAN; JARAMILLO, M. ALEJANDRA; BORSCH, THOMAS; SAMAIN, MARIE-STÉPHANIE; QUANDT, DIETMAR;  
NEINHUIS, CHRISTOPH (2007):**

**Evolution of Piperales - *matK* Gene and *trnK* Intron Sequence Data reveal Lineage  
specific Resolution Contrast.**

In: Molecular Phylogenetics and Evolution 42 (2), p. 477–497. DOI: 10.1016/j.ympev.2006.07.007.

## Pittosporaceae

**BACON, CHRISTINE D.; ALLAN, GERARD J.; ZIMMER, ELIZABETH A.; WAGNER, WARREN L. (2011):**

**Genome scans reveal high levels of Gene flow in Hawaiian *Pittosporum*.**

In: Taxon 60 (3), p. 733–741.

**CAYZER, LINDY W.; CRISP, MICHAEL D.; DONALDSON, STUART (2007):**

***Cheiranthra* (Pittosporaceae).**

In: Australian Systematic Botany 20 (4), p. 340. DOI: 10.1071/SB06045.

**CAYZER, LINDY W.; CRISP, MICHAEL D.; TELFORD, IAN R.H. (2004):**

**Cladistic Analysis and Revision of *Billardiera* (Pittosporaceae).**

In: Australian Systematic Botany 17 (1), p. 83. DOI: 10.1071/SB03028.

**CHANDLER, GREGORY T.; PLUNKETT, GREGORY M.; PINNEY, STEVEN M.; CAYZER, LINDY W.; GEMMILL, CHRISSEN E.C.  
(2007):**

**Molecular and morphological Agreement in Pittosporaceae: phylogenetic Analysis  
with nuclear ITS and Plastid trn L– trn F Sequence Data.**

In: Australian Systematic Botany 20 (5), p. 390. DOI: 10.1071/SB07004.

GEMMILL, CHRISSEN E.C.; ALLAN, GERARD J.; WAGNER, WARREN L.; ZIMMER, ELIZABETH A. (2002):  
**Evolution of insular Pacific *Pittosporum* (Pittosporaceae): Origin of the Hawaiian Radiation.**  
In: *Molecular Phylogenetics and Evolution* 22 (1), p. 31–42. DOI: 10.1006/mpev.2001.1019.

## Plantaginaceae

ALBACH, DIRK C.; BRIGGS, BARBARA G. (2012):  
**Phylogenetic Analysis of Australian Species of *Veronica* (V. Section *Labiatooides*; Plantaginaceae).**  
In: *Australian Systematic Botany* 25 (5), p. 353–363. DOI: 10.1071/SB12014.

ALBACH, DIRK C.; CHASE, MARK W. (2004):  
**Incongruence in Veroniceae (Plantaginaceae): Evidence from two Plastid and a nuclear ribosomal DNA Region.**  
In: *Molecular Phylogenetics and Evolution* 32 (1), p. 183–197. DOI: 10.1016/j.ympev.2003.12.001.

ALBACH, DIRK C.; MEUDT, HEIDI M. (2010):  
**Phylogeny of *Veronica* in the Southern and Northern Hemispheres based on plastid, nuclear ribosomal and nuclear low-copy DNA.**  
In: *Molecular Phylogenetics and Evolution* 54 (2), p. 457–471. DOI: 10.1016/j.ympev.2009.09.030.

ALBACH, DIRK C.; MEUDT, HEIDI M.; OXELMAN, BENGT (2005):  
**Piecing together the “new” Plantaginaceae.**  
In: *American Journal of Botany* 92 (2), p. 297–315.

ALBACH, DIRK C.; STERNBURG, MAXIMILIAN VON; SCALONE, ROMAIN; BARDY, KATHARINA E. (2009):  
**Phylogenetic Analysis and differentiation of *Veronica* Subgenus *Stenocarpon* in the Balkan Peninsula.**  
In: *Botanical Journal of the Linnean Society* 159, p. 616–636.

ALBACH, DIRK C.; UTTERIDGE, TIMOTHY M.A.; WAGSTAFF, STEVEN J. (2005):  
**Origin of Veroniceae (Plantaginaceae, formerly Scrophulariaceae) on New Guinea.**  
In: *Systematic Botany* 30 (2), p. 412–423.

BALDWIN, BRUCE G.; KALISZ, SUSAN; ARMBRUSTER, W. SCOTT (2011):  
**Phylogenetic Perspectives on Diversification, Biogeography, and Floral Evolution of *Collinsia* and *Tonella* (Plantaginaceae).**  
In: *American Journal of Botany* 98 (4), p. 731–753.

BUHK, NIKLAS; ZHAO, LIANG; LI, HONG-QING; ALBACH, DIRK C. (2015):  
**Molecular Systematics and Morphometrics in *Veronica* Subsect. *Canae* (Plantaginaceae).**  
In: *Plant Systematics and Evolution* 301 (8), p. 1967–1979. DOI: 10.1007/s00606-015-1214-1.

DUNBAR-CO, STEPHANIE; WIECZOREK, ANIA M.; MORDEN, CLIFFORD W. (2008):  
**Molecular Phylogeny and adaptive Radiation of the endemic Hawaiian *Plantago* Species (Plantaginaceae).**  
In: *American Journal of Botany* 95 (9), p. 1177–1188. DOI: 10.3732/ajb.0800132.

EKER, İSMAİL; YÜCESAN, BUHARA; SAMEEULLAH, MUHAMMAD; WEIß, WALTER; MÜLLER-URI, FRIEDER; GÜREL, EKREM; KREIS, WOLFGANG (2016):  
**Phylogeny of Anatolian (Turkey) Species in the *Digitalis* Sect. *Globiflorae* (Plantaginaceae).**  
In: *Phytotaxa* 244 (3), p. 263–282.

- ESTES, DWAYNE; SMALL, RANDALL L. (2008):  
**Phylogenetic Relationships of the Monotypic Genus *Amphianthus* (Plantaginaceae Tribe Gratiolleae) inferred from Chloroplast DNA Sequences.**  
In: Systematic Botany 33 (1), p. 176–182.
- FERNÁNDEZ-MAZUECOS, MARIO; BLANCO-PASTOR, JOSÉ LUIS; VARGAS, PABLO (2013):  
**A Phylogeny of Toadflaxes (*Linaria* Mill.) based on Nuclear Internal Transcribed Spacer Sequences: Systematic and evolutionary Consequences.**  
In: International Journal of Plant Sciences 174 (2), p. 234–249. DOI: 10.1086/668790.
- HOGGARD, RONALD K.; KORES, PAUL J.; MOLVRAY, MIA; HOGGARD, GLORIA D.; BROUGHTON, DAVID A. (2003):  
**Molecular Systematics and Biogeography of the Amphibious Genus *Littorella* (Plantaginaceae).**  
In: American Journal of Botany 90 (3), p. 429–435.
- ISHIKAWA, NAOKO; YOKOYAMA, JUN U.N.; TSUKAYA, HIROKAZU (2009):  
**Molecular Evidence of reticulate Evolution in the Subgenus *Plantago* (Plantaginaceae).**  
In: American Journal of Botany 96 (9), p. 1627–1635. DOI: 10.3732/ajb.0800400.
- KELLY, LAURA J.; CULHAM, ALASTAIR (2008):  
**Phylogenetic utility of more Axillary Growth4 (MAX4)-like Genes: a case Study in *Digitalis/Isoplexis* (Plantaginaceae).**  
In: Plant Systematics and Evolution 273 (3-4), p. 133–149. DOI: 10.1007/s00606-008-0008-0.
- KOSACHEV, PETR A.; BEHÇET, LÜTFİ; MAYLAND-QUELLHORST, EIKE; ALBACH, DIRK C. (2016):  
**Analyzing reticulate Relationships using CpDNA and Pyrosequenced ITS1 as exemplified by *Veronica* Subgen. *Pseudolysimachium* (Plantaginaceae).**  
In: Systematic Botany 41 (1), p. 105–119. DOI: 10.1600/036364416X690697.
- LI, GUO-DONG; KIM, CHANGKYUN; ZHA, HONG-GUANG; ZHOU, ZHUO; NIE, ZE-LONG; SUN, HANG (2014):  
**Molecular Phylogeny and Biogeography of the arctic-alpine Genus *Lagotis* (Plantaginaceae).**  
In: Taxon 63 (1), p. 103–115. DOI: 10.12705/631.47.
- MARTINS, ALINE C.; SCHERZ, MARK D.; RENNER, SUSANNE P. (2014):  
**Several Origins of Floral Oil in the Angelonieae, a Southern Hemisphere disjunct Clade of Plantaginaceae.**  
In: American Journal of Botany 101 (12), p. 2113–2120. DOI: 10.3732/ajb.1400470.
- MEUDT, HEIDI M. (2008):  
**Taxonomic Revision of Australasian snow Hebes (*Veronica*, Plantaginaceae).**  
In: Australian Systematic Botany 21 (6), p. 387–421. DOI: 10.1071/SB08034.
- MEUDT, HEIDI M. (2011):  
**Amplified Fragment Length Polymorphism Data reveal a History of Auto- and Allopolyploidy in New Zealand endemic Species of *Plantago* (Plantaginaceae): new Perspectives on a taxonomically challenging Group.**  
In: International Journal of Plant Sciences 172 (2), p. 220–237. DOI: 10.1086/657657.
- MEUDT, HEIDI M.; BAYLY, MICHAEL J. (2008):  
**Phylogeographic Patterns in the Australasian Genus *Chionohebe* (*Veronica* s.l., Plantaginaceae) based on AFLP and Chloroplast DNA Sequences.**  
In: Molecular Phylogenetics and Evolution 47 (1), p. 319–338. DOI: 10.1016/j.ympev.2007.12.019.



- MEUDT, HEIDI M.; SIMPSON, BERYL B. (2007):**  
**Phylogenetic Analysis of morphological Characters in *Ourisia* (Plantaginaceae): taxonomic and evolutionary Implications.**  
In: Annals of the Missouri Botanical Garden 94 (3), p. 554–570. DOI: 10.3417/0026-6493(2007)94[554:PAOMCI]2.0.CO;2.
- MÜLLER, KAI F.; ALBACH, DIRK C. (2010):**  
**Evolutionary rates in *Veronica* L. (Plantaginaceae): disentangling the influence of life History and Breeding System.**  
In: Journal of molecular Evolution 70 (1), p. 44–56. DOI: 10.1007/s00239-009-9307-5.
- MUÑOZ-CENTENO, LUZ M.; ALBACH, DIRK C.; SÁNCHEZ-AGUDO, JOSE A.; MARTÍNEZ-ORTEGA, M. MONTSERRAT (2006):**  
**Systematic Significance of Seed Morphology in *Veronica* (Plantaginaceae): a phylogenetic Perspective.**  
In: Annals of Botany 98 (2), p. 335–350. DOI: 10.1093/aob/mcl120.
- OGUTCEN, EZGI; VAMOSI, JANA C. (2016):**  
**A phylogenetic Study of the Tribe Antirrhineae: Genome duplications and long-distance Dispersals from the Old World to the New World.**  
In: American Journal of Botany 103 (6), p. 1071–1081. DOI: 10.3732/ajb.1500464.
- OYAMA, RYAN K.; BAUM, DAVID A. (2004):**  
**Phylogenetic Relationships of North American *Antirrhinum* (Veronicaceae).**  
In: American Journal of Botany 91 (6), p. 918–925.
- PADILLA-GARCÍA, NÉLIDA; ROJAS-ANDRÉS, BLANCA M.; LÓPEZ-GONZÁLEZ, NOEMÍ; CASTRO, MARIANA; CASTRO, SÍLVIA; LOUREIRO, JOÃO ET AL. (2018):**  
**The challenge of Species Delimitation in the diploid-polyploid Complex *Veronica* subsection *Pentasepalae*.**  
In: Molecular Phylogenetics and Evolution 119, p. 196–209. DOI: 10.1016/j.ymp.2017.11.007.
- PHILBRICK, C. THOMAS; LES, DONALD H. (2000):**  
**Phylogenetic studies in *Callitriche*: Implications for interpretation of ecological, karyological and Pollination System Evolution.**  
In: Aquatic Botany 68, p. 123–141.
- ROJAS-ANDRÉS, BLANCA M.; MARTÍNEZ-ORTEGA, M. MONTSERRAT (2016):**  
**Taxonomic Revision of *Veronica* subsection *Pentasepalae* (*Veronica*, Plantaginaceae sensu APG III).**  
In: Phytotaxa 285 (1), p. 1. DOI: 10.11646/phytotaxa.285.1.1.
- RØNSTED, NINA; CHASE, MARK W.; ALBACH, DIRK C.; BELLO, MARIA ANGÉLICA (2002):**  
**Phylogenetic Relationships within *Plantago* (Plantaginaceae): Evidence from nuclear ribosomal ITS and Plastid trnL-F Sequence Data.**  
In: Botanical Journal of the Linnean Society 139, p. 323–338.
- SAEIDI-MEHRVARZ, SHAHRYAR; ZARRE, SHAHIN (2004):**  
**A cladistic Analysis of the Iranian Species of the Genus *Veronica* (Scrophulariaceae) with Emphasis on the Patterns of Homoplasy.**  
In: Feddes Repertorium 115 (7-8), p. 519–529. DOI: 10.1002/fedr.200311051.
- SÁNCHEZ AGUDO, JOSÉ ÁNGEL; RICO, ENRIQUE; SÁNCHEZ SÁNCHEZ, JOSÉ; MONTSERRAT MARTÍNEZ-ORTEGA, MARIA (2009):**  
**Pollen Morphology in the Genus *Veronica* L. (Plantaginaceae) and its systematic Significance.**

In: Grana 48 (4), p. 239–257. DOI: 10.1080/00173130903364723.

**SCALONE, ROMAIN; KOLF, MARKUS; ALBACH, DIRK C. (2013):**

**Mating System Variation in *Veronica* (Plantaginaceae): Inferences from Pollen/Ovule Ratios and other reproductive Traits.**

In: Nordic Journal of Botany 31 (3), p. 372–384. DOI: 10.1111/j.1756-1051.2012.01706.x.

**SOSA, MARIA DE LAS MERCEDES; DEMATTEIS, MASSIMILIANO (2013):**

**Taxonomic Position and identity of *Stemodia scoparioides* (Gratiolae, Plantaginaceae).**

In: Phytotaxa 135 (1), p. 35. DOI: 10.11646/phytotaxa.135.1.5.

**SURINA, BOŠTJAN; PFANZELT, SIMON; EINZMANN, HELENA J.R.; ALBACH, DIRK C. (2014):**

**Bridging the Alps and the Middle East: Evolution, Phylogeny and Systematics of the Genus *Wulfenia* (Plantaginaceae).**

In: Taxon 63 (4), p. 843–858. DOI: 10.12705/634.18.

**TAY, MEI LIN; MEUDT, HEIDI M.; GARNOCK-JONES, PHILIP J.; RITCHIE, PETER A. (2010):**

**Erratum to: DNA Sequences from three Genomes reveal multiple long-distance Dispersals and non-Monophyly of Sections in Australasian *Plantago* (Plantaginaceae).**

In: Australian Systematic Botany 23 (4), p. 306–307. DOI: 10.1071/SB09040\_ER.

**TAY, MEI LIN; MEUDT, HEIDI M.; GARNOCK-JONES, PHILIP J.; RITCHIE, PETER A. (2010):**

**Testing Species Limits of New Zealand *Plantago* (Plantaginaceae) using Internal Transcribed Spacer (ITS) DNA Sequences.**

In: New Zealand Journal of Botany 48 (3-4), p. 205–224. DOI: 10.1080/0028825X.2010.518318.

**THIV, MIKE; THULIN, MATS; HJERTSON, MATS; KROPF, MATTHIAS; LINDER, HANS PETER (2010):**

**Evidence for a vicariant Origin of Macaronesian–Eritreo/Arabian disjunctions in *Campylanthus* Roth (Plantaginaceae).**

In: Molecular Phylogenetics and Evolution 54 (2), p. 607–616. DOI: 10.1016/j.ympev.2009.10.009.

**VARGAS, PABLO; ROSSELLÓ, J. A.; OYAMA, RYAN K.; GEMES, J. (2004):**

**Molecular Evidence for Naturalness of Genera in the Tribe Antirrhineae (Scrophulariaceae) and three independent evolutionary Lineages from the New World and the Old World.**

In: Plant Systematics and Evolution 249 (3-4), p. 151–172. DOI: 10.1007/s00606-004-0216-1.

**WAGSTAFF, STEVEN J.; GARNOCK-JONES, PHILIP J. (1998):**

**Evolution and Biogeography of the *Hebe* complex (Scrophulariaceae) inferred from ITS Sequences.**

In: New Zealand Journal of Botany 36 (3), p. 425–437. DOI: 10.1080/0028825X.1998.9512581.

**WAGSTAFF, STEVEN J.; GARNOCK-JONES, PHILIP J. (2000):**

**Patterns of Diversification in *Chionohebe* and *Parahebe* (Scrophulariaceae) inferred from ITS Sequences.**

In: New Zealand Journal of Botany 38 (3), p. 389–407. DOI: 10.1080/0028825X.2000.9512691.

**WESSINGER, CAROLYN A.; FREEMAN, CRAIG C.; MORT, MARK E.; RAUSHER, MARK D.; HILEMAN, LENA C. (2016):**

**Multiplexed shotgun Genotyping resolves Species Relationships within the North American Genus *Penstemon*.**

In: American Journal of Botany 103 (5), p. 912–922. DOI: 10.3732/ajb.1500519.

**WOLFE, ANDREA D.; DATWYLER, SHANNON L.; RANDLE, CHRISTOPHER P. (2002):**

**A phylogenetic and Biogeographic Analysis of the Cheloneae (Scrophulariaceae) based on ITS and matK Sequence Data.**

In: Systematic Botany 27 (1), p. 138–148.

**WOLFE, ANDREA D.; RANDLE, CHRISTOPHER P.; DATWYLER, SHANNON L.; MORAWETZ, JEFFERY J.; ARGUEDAS, NIDIA (2006):**

**Phylogeny, taxonomic Affinities, and Biogeography of *Penstemon* (Plantaginaceae) based on ITS and cpDNA Sequence Data.**

In: American Journal of Botany 93 (11), p. 1699–1713.

**YOUSEFI, NAFISEH; ZARRE, SHAHIN; HEUBL, GÜNTHER (2016):**

**Molecular Phylogeny of the mainly Mediterranean Genera *Chaenorhinum*, *Kickxia* and *Nanorrhinum* (Plantaginaceae, Tribe Antirrhineae), with Focus on Taxa in the Flora Iranica Region.**

In: Nordic Journal of Botany 34 (4), p. 455–463. DOI: 10.1111/njb.01000.

## **Platanaceae**

**FENG, YUN; OH, SANG-HUN; MANOS, PAUL P. (2005):**

**Phylogeny and Historical Biogeography of the Genus *Platanus* as inferred from Nuclear and Chloroplast DNA.**

In: Systematic Botany 30 (4), p. 786–799.

**GRIMM, GUIDO W.; DENK, THOMAS (2008):**

**ITS Evolution in *Platanus* (Platanaceae): homoeologues, pseudogenes and ancient Hybridization.**

In: Annals of Botany 101 (3), p. 403–419. DOI: 10.1093/aob/mcm305.

**GRIMM, GUIDO W.; DENK, THOMAS (2010):**

**The reticulate Origin of modern Plane Trees (*Platanus*, Platanaceae): A nuclear Marker Puzzle.**

In: Taxon 59 (1), p. 134–147.

## **Plumbaginaceae**

**AKHANI, HOSSEIN; MALEKMOHAMMADI, MARYAM; MAHDAVI, PARASTOO; GHARIBIYAN, AROOTIN; CHASE, MARK W. (2013):**

**Phylogenetics of the Irano-Turanian Taxa of *Limonium* (Plumbaginaceae) based on ITS nrDNA Sequences and Leaf Anatomy provides Evidence for Species Delimitation and Relationships of Lineages.**

In: Botanical Journal of the Linnean Society 171 (3), p. 519–550. DOI: 10.1111/boj.12015.

**BRULLO, SALVATORE; ERBEN, MATTHIAS (2016):**

**The Genus *Limonium* (Plumbaginaceae) in Greece.**

In: Phytotaxa 240 (1), p. 1. DOI: 10.11646/phytotaxa.240.1.1.

**FUERTES-AGUILAR, JAVIER; NIETO FELINER, GONZALO (2003):**

**Additive Polymorphisms and Reticulation in an ITS Phylogeny of Thrifts (*Armeria*, Plumbaginaceae).**

In: Molecular Phylogenetics and Evolution 28 (3), p. 430–447. DOI: 10.1016/S1055-7903(02)00301-9.

**LLEDÓ, M. DOLORES (2000):**

**Polyphyly of *Limoniastrum* (Plumbaginaceae): Evidence from DNA Sequences of Plastid *rbc L*, *trn L* Intron and *trnL-F* intergene Spacer.**

In: Botanical Journal of the Linnean Society 132 (2), p. 175–191. DOI: 10.1006/boj.1999.0304.

- LLEDÓ, M. DOLORES; CRESPO, MANUEL B.; FAY, MICHAEL F.; CHASE, MARK W. (2005):  
**Molecular Phylogenetics of *Limonium* and related Genera (Plumbaginaceae):  
 biogeographical and systematic Implications.**  
 In: American Journal of Botany 92 (7), p. 1189–1198. DOI: 10.3732/ajb.92.7.1189.
- LLEDÓ, M. DOLORES; KARIS, PER OLA; CRESPO, MANUEL B.; FAY, MICHAEL F.; CHASE, MARK W. (2001):  
**Phylogenetic Position and taxonomic Status of the Genus *Aegialitis* and subfamilies  
 Statioideae and Plumbaginoideae (Plumbaginaceae): Evidence from Plastid DNA  
 Sequences and Morphology.**  
 In: Plant Systematics and Evolution 229 (1-2), p. 107–124. DOI: 10.1007/s006060170021.
- MOHARREK, FARIDEH; KAZEMPOUR-OSALOO, SHAHROKH; ASSADI, MOSTAFA (2014):  
**Molecular Phylogeny of Plumbaginaceae with Emphasis on *Acantholimon* Boiss.  
 based on nuclear and Plastid DNA Sequences in Iran.**  
 In: Biochemical Systematics and Ecology 57, p. 117–127. DOI: 10.1016/j.bse.2014.07.023.
- PALACIOS, C.; ROSSELLÓ, J. A.; GONZÁLEZ-CANDELAS, F. (2000):  
**Study of the evolutionary Relationships among *Limonium* Species (Plumbaginaceae)  
 using nuclear and cytoplasmic molecular Markers.**  
 In: Molecular Phylogenetics and Evolution 14 (2), p. 232–249. DOI: 10.1006/mpev.1999.0690.

## Poaceae

- ACOSTA, JUAN M.; SCATAGLINI, MARIA AMALIA; REINHEIMER, R.; ZULOAGA, FERNANDO OMAR (2014):  
**A phylogenetic Study of Subtribe Otachyriinae (Poaceae, Panicoideae, Paspaleae).**  
 In: Plant Systematics and Evolution 300 (10), p. 2155–2166. DOI: 10.1007/s00606-014-1034-8.
- ADOUKONOU-SAGBADJA, HUBERT; WAGNER, CAROLA; ORDON, FRANK; FRIEDT, WOLFGANG (2010):  
**Reproductive System and molecular phylogenetic Relationships of Fonio Millets  
 (*Digitaria* spp., Poaceae) with some polyploid wild Relatives.**  
 In: Tropical Plant Biology 3 (4), p. 240–251. DOI: 10.1007/s12042-010-9063-0.
- AKIYAMA, YUKIO; GOEL, SHAIKENDRA; CONNER, JOANN A.; HANNA, WAYNE W.; YAMADA-AKIYAMA, HITOMI; OZIAS-  
 AKINS, PEGGY (2011):  
**Evolution of the Apomixis transmitting Chromosome in *Pennisetum*.**  
 In: BMC Evolutionary Biology 11, p. 289.
- ALISCIONI, SANDRA S.; GIUSSANI, LILIANA M.; ZULOAGA, FERNANDO OMAR; KELLOGG, ELIZABETH A. (2003):  
**A molecular Phylogeny of *Panicum* (Poaceae: Paniceae): tests of Monophyly and  
 phylogenetic Placement within the Panicoideae.**  
 In: American Journal of Botany 90 (5), p. 796–821. DOI: 10.3732/ajb.90.5.796.
- ALLENDE, JOSE RAMON GRANDE (2014):  
**Novitates Agrostologicae IV. Additional Segregates from *Panicum* Incertae Sedis.**  
 In: Phytoneuron 22, p. 1–6.
- AMARILLA, LEONARDO D.; CHIAPPELLA, JORGE O.; NAGAHAMA, NICOLÁS; ANTON, ANA M. (2013):  
**Inclusion of *Dasyochloa* in the amphitropical Genus *Munroa* (Poaceae, Chloridoideae)  
 based on morphological Evidence.**  
 In: Darwiniana, nueva serie 1 (2), p. 241–252. DOI: 10.14522/darwiniana.2013.12.502.
- ANDERSON, BENJAMIN M.; BARRETT, MATTHEW D.; KRAUSS, SIEGFRIED L.; THIELE, KEVIN R. (2016):  
**Untangling a Species complex of arid zone Grasses (*Triodia*) reveals Patterns  
 congruent with co-occurring Animals.**  
 In: Molecular Phylogenetics and Evolution 101, p. 142–162. DOI: 10.1016/j.ympev.2016.05.014.

- ARTHAN, WATCHARA; TRAIPEM, PAWEENA; GALE, STEPHAN W.; NORSAENGSR, MONTHON; KETHIRUN, LALITA (2016):  
Re-evaluation of the taxonomic Status of *Hackelochloa* (Poaceae) based on  
anatomical and phenetic Analyses.**  
In: Botanical Journal of the Linnean Society 181 (2), p. 224–245. DOI: 10.1111/boj.12411.
- ATTIGALA, LAKSHMI; TRIPLETT, JIMMY K.; KATHRIARACHCHI, HASHENDRA-SUVINI; CLARK, LYNN G. (2014):  
A new Genus and a major temperate bamboo Lineage of the Arundinarieae (Poaceae:  
Bambusoideae) from Sri Lanka based on a multi-locus Plastid Phylogeny.**  
In: Phytotaxa 174 (4), p. 187. DOI: 10.11646/phytotaxa.174.4.1.
- ATTIGALA, LAKSHMI; WYSOCKI, WILLIAM P.; DUVALL, MELVIN R.; CLARK, LYNN G. (2016):  
Phylogenetic estimation and morphological Evolution of Arundinarieae  
(Bambusoideae: Poaceae) based on plastome phylogenomic Analysis.**  
In: Molecular Phylogenetics and Evolution 101, p. 111–121. DOI: 10.1016/j.ympev.2016.05.008.
- BANFI, ENRICO; GALASSO, GABRIELE; FOGGI, BRUNO; KOPECKÝ, DAVID; ARDENGI, NICOLA M.G. (2017):  
From *Schedonorus* and *Micropyropsis* to *Lolium* (Poaceae: Loliinae): new  
Combinations and typifications.**  
In: Taxon 66 (3), p. 708–717. DOI: 10.12705/663.11.
- BARBER, JANET C.; HAMES, KASEY A.; CIALDELLA, ANA MARÍA; GIUSSANI, LILIANA M.; MORRONE, OSVALDO (2009):  
Phylogenetic Relationships of *Piptochaetium* Presl (Poaceae: Stipeae) and related  
Genera reconstructed from nuclear and Chloroplast Sequence Datasets.**  
In: Taxon 58 (2), p. 375–380. DOI: 10.1002/tax.582005.
- BARKER, NIGEL P.; GALLEY, CHLOÉ; VERBOOM, GEORGE ANTHONY; MAFA, P.; GILBERT, M.; LINDER, HANS PETER (2007):  
The Phylogeny of the Austral grass Subfamily Danthonioideae: Evidence from  
multiple Data sets.**  
In: Plant Systematics and Evolution 264 (3-4), p. 135–156. DOI: 10.1007/s00606-006-0479-9.
- BESNARD, GUILLAUME; CHRISTIN, PASCAL-ANTOINE; MALÉ, PIERRE-JEAN G.; COISSAC, ERIC; RALIMANANA, HÉLÈNE;  
VORONTSOVA, MARIA P. (2013):  
Phylogenomics and Taxonomy of Lecomtelleae (Poaceae), an isolated panicoid  
Lineage from Madagascar.**  
In: Annals of Botany 112 (6), p. 1057–1066. DOI: 10.1093/aob/mct174.
- BESS, EMILIE C.; DOUST, ANDREW N.; KELLOGG, ELIZABETH A. (2005):  
A naked Grass in the “Bristle Clade”: A phylogenetic and Developmental Study of  
*Panicum* Section *Bulbosa* (Paniceae: Poaceae).**  
In: International Journal of Plant Sciences 166 (3), p. 371–381.
- BIENIEK, WOJCIECH; MIZIANTY, MARTA; SZKLARCZYK, MAREK (2015):  
Sequence Variation at the three Chloroplast loci (matK, rbcL, trnH-psbA) in the  
Triticeae Tribe (Poaceae): Comments on the Relationships and Utility in DNA  
Barcoding of selected Species.**  
In: Plant Systematics and Evolution 301 (4), p. 1275–1286. DOI: 10.1007/s00606-014-1138-1.
- BIRCH, JOANNE L.; BERWICK, FREYA M.; WALSH, NEVILLE G.; CANTRILL, DAVID J.; MURPHY, DANIEL J. (2014):  
Distribution of morphological Diversity within widespread Australian Species of *Poa*  
(Poaceae, Tribe Poaeae) and Implications for Taxonomy of the Genus.**  
In: Australian Systematic Botany 27 (6), p. 333–354. DOI: 10.1071/SB14028.
- BIRCH, JOANNE L.; CANTRILL, DAVID J.; WALSH, NEVILLE G.; MURPHY, DANIEL J. (2014):**

**Phylogenetic Investigation and Divergence dating of *Poa* (Poaceae, Tribe Poeae) in the Australasian Region.**

In: Botanical Journal of the Linnean Society 175 (4), p. 523–552. DOI: 10.1111/boj.12185.

**BOUCHENAK-KHELLADI, YANIS; SALAMIN, NICOLAS; SAVOLAINEN, VINCENT; FOREST, FÉLIX; VAN DER BANK, MICHELLE; CHASE, MARK W.; HODKINSON, TREVOR R. (2008):**

**Large multi-gene phylogenetic Trees of the Grasses (Poaceae): Progress towards complete tribal and generic level Sampling.**

In: Molecular Phylogenetics and Evolution 47 (2), p. 488–505. DOI: 10.1016/j.ympev.2008.01.035.

**BRASSAC, JONATHAN; BLATTNER, FRANK R. (2015):**

**Species-Level Phylogeny and Polyploid Relationships in *Hordeum* (Poaceae) inferred by Next-Generation Sequencing and in Silico Cloning of Multiple Nuclear Loci.**

In: Systematic Biology 64 (5), p. 792–808. DOI: 10.1093/sysbio/syv035.

**BROWN, AUSTIN J. (2015):**

**A morphological search for *Lachnagrostis* among the South African *Agrostis* and *Polypogon* (Poaceae).**

In: Muelleria 34, p. 23–46.

**BURKE, SEAN V.; GRENNAN, COLIN P.; DUVALL, MELVIN R. (2012):**

**Plastome Sequences of two New World bamboos - *Arundinaria gigantea* and *Cryptochloa strictiflora* (Poaceae) - extend phylogenomic Understanding of Bambusoideae.**

In: American Journal of Botany 99 (12), p. 1951–1961. DOI: 10.3732/ajb.1200365.

**BUSTOS, ALFREDO DE; JOUVE, NICOLAS (2002):**

**Phylogenetic Relationships of the Genus *Secale* based on the Characterisation of rDNA ITS Sequences.**

In: Plant Systematics and Evolution 235 (1), p. 147–154. DOI: 10.1007/s00606-002-0215-z.

**BUSTOS, ALFREDO DE; JOUVE, NICOLAS (2006):**

**Characterisation and phylogenetic Analysis of the Genes coding for high molecular Weight Glutenin Subunits in the diploid Species of *Aegilops*.**

In: International Journal of Plant Sciences 167 (2), p. 359–366.

**CATALÁN, PILAR; OLMSTEAD, RICHARD G. (2000):**

**Phylogenetic Reconstruction of the Genus *Brachypodium* P.Beauv. (Poaceae) from combined Sequences of Chloroplast ndhF Gene and nuclear ITS.**

In: Plant Systematics and Evolution 220, p. 1–19.

**CATALÁN, PILAR; TORRECILLA, PEDRO; LÓPEZ RODRÍGUEZ, JOSE ANGEL; OLMSTEAD, RICHARD G. (2004):**

**Phylogeny of the festucoid Grasses of Subtribe Loliinae and Allies (Poeae, Pooideae) inferred from ITS and trnL-F Sequences.**

In: Molecular Phylogenetics and Evolution 31 (2), p. 517–541. DOI: 10.1016/j.ympev.2003.08.025.

**CATALÁN, PILAR; TORRECILLA, PEDRO; LÓPEZ-RODRÍGUEZ, JOSÉ A.; MÜLLER, JOCHEN; STACE, CLIVE A. (2007):**

**A Systematic Approach to Subtribe Loliinae (Poaceae: Pooideae) based on phylogenetic Evidence.**

In: Aliso 23 (1), p. 380–405.

**CERROS-TLATILPA, ROSA; COLUMBUS, TRAVIS J.; BARKER, NIGEL P. (2011):**

**Phylogenetic Relationships of *Aristida* and Relatives (Poaceae, Aristidoideae) based on noncoding Chloroplast (trnL-F, rpl16) and nuclear (ITS) DNA Sequences.**

In: American Journal of Botany 98 (11), p. 1868–1886. DOI: 10.3732/ajb.1100103.

CHE, YONGHE; YANG, YANPING; YANG, XINMING; LI, XIUQUAN; LI, LIHUI (2015):

**Phylogenetic Relationship and Diversity among *Agropyron* Gaertn. Germplasm using SSRs Markers.**

In: Plant Systematics and Evolution 301 (1), p. 163–170. DOI: 10.1007/s00606-014-1062-4.

CHEMISQUY, MARIA AMELIA; GIUSSANI, LILIANA M.; SCATAGLINI, MARIA AMALIA; KELLOGG, ELIZABETH A.; MORRONE, OSVALDO (2010):

**Phylogenetic studies favour the Unification of *Pennisetum*, *Cenchrus* and *Odontelytrum* (Poaceae): a combined nuclear, Plastid and morphological Analysis, and nomenclatural Combinations in *Cenchrus*.**

In: Annals of Botany 106 (1), p. 107–130. DOI: 10.1093/aob/mcq090.

CHIAPELLA, JORGE O. (2007):

**A molecular phylogenetic Study of *Deschampsia* (Poaceae: Aveneae) inferred from nuclear ITS and Plastid trnL Sequence Data: support for the Recognition of *Avenella* and *Vahlodea*.**

In: Taxon 56 (1), p. 55–64.

CHRISTIN, PASCAL-ANTOINE; BESNARD, GUILLAUME (2009):

**Two independent C4 Origins in Aristidoideae (Poaceae) revealed by the Recruitment of distinct Phosphoenolpyruvate Carboxylase Genes.**

In: American Journal of Botany 96 (12), p. 2234–2239. DOI: 10.3732/ajb.0900111.

CIALDELLA, ANA MARÍA; GIUSSANI, LILIANA M.; AAGESEN, LONE; ZULOAGA, FERNANDO OMAR; MORRONE, OSVALDO (2007):

**A Phylogeny of *Piptochaetium* (Poaceae: Pooideae: Stipeae) and related Genera based on a combined Analysis including trnL-F, rpl16, and Morphology.**

In: Systematic Botany 32 (3), p. 545–559.

CIALDELLA, ANA MARÍA; SALARIATO, DIEGO LEONEL; AAGESEN, LONE; GIUSSANI, LILIANA M.; ZULOAGA, FERNANDO OMAR; MORRONE, OSVALDO (2010):

**Phylogeny of New World Stipeae (Poaceae): an Evaluation of the Monophyly of *Aciachne* and *Amelichloa*.**

In: Cladistics 26 (6), p. 563–578. DOI: 10.1111/j.1096-0031.2010.00310.x.

CIALDELLA, ANA MARÍA; ZULOAGA, FERNANDO OMAR (2011):

**Taxonomic Study of *Gymnopogon* (Poaceae, Chloridoideae, Cynodonteae).**

In: Annals of the Missouri Botanical Garden 98 (3), p. 301–330. DOI: 10.3417/2009071.

CLARK, LYNN G.; DRANSFIELD, SOEJATMI; TRIPLETT, JIMMY K.; SÁNCHEZ-KEN, J. GABRIEL (2007):

**Phylogenetic Relationships among the One-Flowered, Determinate Genera of Bambuseae (Poaceae: Bambusoideae).**

In: Aliso 23 (1), p. 315–332.

COLUMBUS, TRAVIS J.; CERROS-TLATILPA, ROSA; KINNEY, MICHAEL S.; SIQUEIROS-DELGADO, MARIA ELENA; BELL, HESTER L.; GRIFFITH, M. PATRICK; REFULIO-RODRIGUEZ, NANCY F. (2007):

**Phylogenetics of Chloridoideae (Gramineae): a preliminary Study based on Nuclear Ribosomal Internal Transcribed Spacer and Chloroplast trnL-F Sequences.**

In: Aliso 23 (1), p. 565–579.

CONSAUL, LAURIE L.; GILLESPIE, LYNN J.; WATERWAY, MARCIA J. (2008):

**Systematics of North American arctic diploid *Puccinellia* (Poaceae): Morphology, DNA Content, and AFLP Markers.**

In: Systematic Botany 33 (2), p. 251–261. DOI: 10.1600/036364408784571662.

**CONSAUL, LAURIE L.; GILLESPIE, LYNN J.; WATERWAY, MARCIA J. (2010):**

**Evolution and polyploid Origins in North American arctic *Puccinellia* (Poaceae) based on nuclear ribosomal spacer and Chloroplast DNA Sequences.**

In: American Journal of Botany 97 (2), p. 324–336. DOI: 10.3732/ajb.0900180.

**DAVIDSE, GERRIT; SORENG, ROBERT J.; PETERSON, PAUL M. (2009):**

***Agrostopoa* (Poaceae, Pooideae, Poeae, Poinae), a new Genus with three Species from Colombia.**

In: Novon: A Journal for Botanical Nomenclature 19 (1), p. 32–40. DOI: 10.3417/2007132.

**DAVIS, JERROLD I.; SORENG, ROBERT J. (2007):**

**A preliminary phylogenetic Analysis of the Grass Subfamily Pooideae (Poaceae), with Attention to structural Features of the Plastid and Nuclear Genomes, including an Intron Loss in GBSSI.**

In: Aliso 23 (1), p. 335–348.

**DAVIS, JERROLD I.; SORENG, ROBERT J. (2010):**

**Migration of Endpoints of two Genes relative to Boundaries between Regions of the Plastid Genome in the Grass Family (Poaceae).**

In: American Journal of Botany 97 (5), p. 874–892. DOI: 10.3732/ajb.0900228.

**DENHAM, SILVIA S.; ZULOAGA, FERNANDO OMAR (2007):**

**Phylogenetic Relationships of the Decumbentes Group of *Paspalum*, *Thrasya*, and *Thrasypsis* (Poaceae: Panicoideae: Paniceae).**

In: Aliso 23 (1), p. 545–562.

**DÍAZ-PÉREZ, A. J.; SHARIFI-TEHRANI, M.; INDA, LUIS A.; CATALÁN, PILAR (2014):**

**Polyphyly, Gene-duplication and extensive Allopolyploidy framed the Evolution of the ephemeral *Vulpia* Grasses and other fine-leaved Loliinae (Poaceae).**

In: Molecular Phylogenetics and Evolution 79, p. 92–105. DOI: 10.1016/j.ympev.2014.06.009.

**DILLON, P. L.; LAWRENCE, P. K.; HENRY, ROBERT J. (2001):**

**The Use of ribosomal ITS to determine phylogenetic Relationships within *Sorghum*.**

In: Plant Systematics and Evolution 230 (1-2), p. 97–110. DOI: 10.1007/s006060170007.

**DILLON, P. L.; LAWRENCE, P. K.; HENRY, ROBERT J.; PRICE, H. J. (2007):**

***Sorghum* resolved as a distinct Genus based on combined ITS1, *ndhF* and *Adh1* Analyses.**

In: Plant Systematics and Evolution 268 (1-4), p. 29–43. DOI: 10.1007/s00606-007-0571-9.

**DONADÍO, SABINA; GIUSSANI, LILIANA M.; KELLOGG, ELIZABETH A.; ZUOLAGA, FERNANDO O.; MORRONE, OSVALDO (2009):**

**A preliminary molecular Phylogeny of *Pennisetum* and *Cenchrus* (Poaceae-Paniceae) based on the *trnL-F*, *rpl16* Chloroplast Markers.**

In: Taxon 58 (2), p. 392–404. DOI: 10.1002/tax.582007.

**DONG, ZHEN-ZHEN; FAN, XING; SHA, LI-NA; ZENG, JIAN; WANG, YI; CHEN, QIAN ET AL. (2013):**

**Phylogeny and molecular Evolution of the *rbcl* Gene of St Genome in *Elymus sensu lato* (Poaceae: Triticeae).**

In: Biochemical Systematics and Ecology 50, p. 322–330. DOI: 10.1016/j.bse.2013.05.005.

**DÖRING, ELKE; SCHNEIDER, JULIA; HILU, KHIDIR W.; RÖSER, MARTIN (2007):**

**Phylogenetic Relationships in the Aveneae/Poeae complex (Pooideae, Poaceae).**



In: Kew Bulletin 62, p. 407–424.

**DOUST, ANDREW N.; PENLY, ANYA M.; JACOBS, SURREY W.L.; KELLOGG, ELIZABETH A. (2007):**

**Congruence, Conflict, and Polyploidization shown by Nuclear and Chloroplast Markers in the Monophyletic "Bristle Clade" (Paniceae, Panicoideae, Poaceae).**

In: Systematic Botany 32 (3), p. 531–544.

**DUVALL, MELVIN R.; DAVIS, JERROLD; CLARK, LYNN G.; NOLL, JEFFREY; GOLDMAN, DOUGLAS H.; SÁNCHEZ-KEN, J. GABRIEL (2007):**

**Phylogeny of the Grasses (Poaceae) Revisited.**

In: Aliso 23 (1), p. 237–247. DOI: 10.5642/aliso.20072301.18.

**DUVALL, MELVIN R.; FISHER, AMANDA E.; COLUMBUS, TRAVIS J.; INGRAM, AMANDA L.; WYSOCKI, WILLIAM P.; BURKE, SEAN V. ET AL. (2016):**

**Phylogenomics and Plastome Evolution of the Chloridoid Grasses (Chloridoideae: Poaceae).**

In: International Journal of Plant Sciences 177 (3), p. 235–246. DOI: 10.1086/684526.

**ESCOBAR, JUAN S.; SCORNAVACCA, CÉLINE; CENCI, ALBERTO; GUILHAUMON, CLAIRE; SANTONI, SYLVAIN; DOUZERY, EMMANUEL J. P. ET AL. (2011):**

**Multigenic Phylogeny and Analysis of Tree Incongruences in Triticeae (Poaceae).**

In: BMC Evolutionary Biology 11, p. 181. DOI: 10.1186/1471-2148-11-181.

**ESSI, LILIANA; LONGHI-WAGNER, HILDA MARIA; SOUZA-CHIES, TATIANA TEIXEIRA DE (2008):**

**Phylogenetic Analysis of the *Briza*-complex (Poaceae).**

In: Molecular Phylogenetics and Evolution 47 (3), p. 1018–1029. DOI: 10.1016/j.ympev.2008.03.007.

**ESSI, LILIANA; WAGNER, HILDA MARIA LONGHI; SOUZA-CHIES, TATIANA TEIXEIRA DE (2014):**

**ISSR as a Tool to support taxonomic Decisions: a first Approach for *Chascolytrum* Species complexes (Poaceae).**

In: Journal of Biotechnology and Biodiversity 5 (2).

**ESSI, LILIANA; WAGNER, HILDA MARIA LONGHI; SOUZA-CHIES, TATIANA TEIXEIRA DE (2011):**

**New Combinations within the *Briza* Complex (Poaceae, Pooideae, Poaeae).**

In: Novon: A Journal for Botanical Nomenclature 21 (3), p. 326–330. DOI: 10.3417/2010026.

**FAN, XING; LIU, JING; SHA, LI-NA; SUN, GEN-LOU; HU, ZHI-QIN; ZENG, JIAN ET AL. (2014):**

**Evolutionary Pattern of rDNA following Polyploidy in *Leymus* (Triticeae: Poaceae).**

In: Molecular Phylogenetics and Evolution 77, p. 296–306. DOI: 10.1016/j.ympev.2014.04.016.

**FAN, XING; SHA, LI-NA; DONG, ZHEN-ZHEN; ZHANG, HAI-QIN; KANG, HOU-YANG; WANG, YI ET AL. (2013):**

**Phylogenetic Relationships and Y Genome Origin in *Elymus* L. sensu lato (Triticeae: Poaceae) based on single-copy nuclear *Acc1* and *Pgk1* Gene Sequences.**

In: Molecular Phylogenetics and Evolution 69 (3), p. 919–928. DOI: 10.1016/j.ympev.2013.06.012.

**FAN, XING; SHA, LI-NA; YANG, RUI-WU; ZHANG, HAI-QIN; KANG, HOU-YANG; DING, CHUN-BANG ET AL. (2009):**

**Phylogeny and evolutionary History of *Leymus* (Triticeae: Poaceae) based on a single-copy nuclear Gene Encoding Plastid Acetyl-CoA Carboxylase.**

In: BMC Evolutionary Biology 9, p. 247. DOI: 10.1186/1471-2148-9-247.

**FAN, XING; SHA, LI-NA; YU, SHUANG-BIN; WU, DAN-DAN; CHEN, XIAO-HONG; ZHUO, XIAO-FENG ET AL. (2013):**

**Phylogenetic Reconstruction and Diversification of the Triticeae (Poaceae) based on single-copy nuclear *Acc1* and *Pgk1* Gene Data.**

In: Biochemical Systematics and Ecology 50, p. 346–360. DOI: 10.1016/j.bse.2013.05.010.

**FISHER, AMANDA E.; HASENSTAB-LEHMAN, KRISTEN M.; BELL, HESTER L.; BLAINE, ELLEN; INGRAM, AMANDA L.; COLUMBUS, TRAVIS J. (2016):**

- Evolutionary History of chloridoid Grasses estimated from 122 nuclear Loci.**  
In: *Molecular Phylogenetics and Evolution* 105, p. 1–14. DOI: 10.1016/j.ympev.2016.08.011.
- FISHER, AMANDA E.; TRIPLETT, JAMES K.; HO, CHI-SING; SCHILLER, ALICIA D.; OLTROGGE, KIMBERLY A.; SCHRODER, ERIC P. ET AL. (2009):**  
**Paraphyly in the Bamboo Subtribe Chusqueinae (Poaceae: Bambusoideae) and a revised infrageneric Classification for *Chusquea*.**  
In: *Systematic Botany* 34 (4), p. 673–683. DOI: 10.1600/036364409790139790.
- FORTUNE, PHILIPPE M.; POURTAU, NATHALIE; VIRON, NICOLAS; AÏNOUCHE, MALIKA L. (2008):**  
**Molecular Phylogeny and reticulate Origins of the polyploid *Bromus* Species from Section *Genea* (Poaceae).**  
In: *American Journal of Botany* 95 (4), p. 454–464. DOI: 10.3732/ajb.95.4.454.
- GALLEY, CHLOÉ; LINDER, HANS PETER (2007):**  
**The Phylogeny of the Pentaschistis Clade (Danthonioideae, Poaceae) based on Chloroplast DNA, and the Evolution and loss of complex Characters.**  
In: *Evolution* 61 (4), p. 864–884. DOI: 10.1111/j.1558-5646.2007.00067.x.
- GAMACHE, JACQUES; SUN, GEN-LOU (2015):**  
**Phylogenetic Analysis of the Genus *Pseudoroegneria* and the Triticeae Tribe using the RbcL Gene.**  
In: *Biochemical Systematics and Ecology* 62, p. 73–81. DOI: 10.1016/j.bse.2015.07.038.
- GAO, GANG; TANG, ZILIN; WANG, QIAN; GOU, XUEMEI; DING, CHUN-BANG; ZHANG, LI ET AL. (2014):**  
**Phylogeny and maternal donor of *Kengyilia* (Triticeae: Poaceae) based on Chloroplast trnT–trnL Sequences.**  
In: *Biochemical Systematics and Ecology* 57, p. 102–107. DOI: 10.1016/j.bse.2014.07.004.
- GE, YA-LONG GUO AND SONG (2005):**  
**Molecular Phylogeny of Oryzeae (Poaceae) based on DNA Sequences from Chloroplast, Mitochondrial and Nuclear Genomes.**  
In: *American Journal of Botany* 92 (9), p. 1548–1558.
- GILLESPIE, LYNN J.; ARCHAMBAULT, ANNIE; SORENG, ROBERT J. (2007):**  
**Phylogeny of *Poa* (Poaceae) based on trnT–trnF Sequence Data: Major Clades and basal Relationships.**  
In: *Aliso* 23 (1), p. 420–434.
- GILLESPIE, LYNN J.; SORENG, ROBERT J. (2005):**  
**A phylogenetic Analysis of the Bluegrass Genus *Poa* based on cpDNA Restriction Site Data.**  
In: *Systematic Botany* 30 (1), p. 84–105.
- GILLESPIE, LYNN J.; SORENG, ROBERT J.; BULL, ROGER D.; JACOBS, SURREY W.L.; REFULIO-RODRIGUEZ, NANCY F. (2008):**  
**Phylogenetic Relationships in Subtribe Poinae (Poaceae, Poaeae) based on nuclear ITS and Plastid trnT–trnL–trnF Sequences.**  
In: *Botany* 86 (8), p. 938–967. DOI: 10.1139/B08-076.
- GILLESPIE, LYNN J.; SORENG, ROBERT J.; JACOBS, SURREY W.L. (2009):**  
**Phylogenetic Relationships of Australian *Poa* (Poaceae: Poinae), including molecular Evidence for two new Genera, *Saxipoa* and *Sylvipoa*.**  
In: *Australian Systematic Botany* 22 (6), p. 413–436. DOI: 10.1071/SB09016.

- GIUSSANI, LILIANA M.; ZULOAGA, FERNANDO OMAR; QUARÍN, CAMILO L.; COTA-SÁNCHEZ, J. HUGO; UBAYASENA, KUMARY; MORRONE, OSVALDO (2009):  
**Phylogenetic Relationships in the Genus *Paspalum* (Poaceae: Panicoideae: Paniceae): An Assessment of the *Quadrifaria* and *Virgata* Informal Groups.**  
 In: Systematic Botany 34 (1), p. 32–43. DOI: 10.1600/036364409787602258.
- GOH, W. L.; CHANDRAN, S.; FRANKLIN, D. C.; ISAGI, YUJI; KOSHY, K. C.; SUNGKAEW, P. ET AL. (2013):  
**Multi-gene Region phylogenetic Analyses suggest reticulate Evolution and a Clade of Australian Origin among paleotropical woody Bamboos (Poaceae: Bambusoideae: Bambuseae).**  
 In: Plant Systematics and Evolution 299 (1), p. 239–257. DOI: 10.1007/s00606-012-0718-1.
- GOH, W. L.; CHANDRAN, S.; LIN, R.-S.; XIA, NIAN-HE; WONG, KHOON MENG (2010):  
**Phylogenetic Relationships among Southeast Asian climbing Bamboos (Poaceae: Bambusoideae) and the *Bambusa* Complex.**  
 In: Biochemical Systematics and Ecology 38 (4), p. 764–773. DOI: 10.1016/j.bse.2010.07.006.
- GOLOVNINA, K. A.; GLUSHKOV, P. A.; BLINOV, ALEXANDER G.; MAYOROV, V. I.; ADKISON, L. R.; GONCHAROV, N. P. (2007):  
**Molecular Phylogeny of the Genus *Triticum* L.**  
 In: Plant Systematics and Evolution 264 (3-4), p. 195–216. DOI: 10.1007/s00606-006-0478-x.
- GUO, GUO-YE; YANG, RUI-WU; DING, CHUN-BANG; FAN, XING; ZHANG, LI; ZHOU, YONG-HONG (2014):  
**Phylogenetic Relationships among *Leymus* and related diploid Genera (Triticeae: Poaceae) based on Chloroplast trnQ-rps16 Sequences.**  
 In: Nordic Journal of Botany 32 (5), p. 658–666. DOI: 10.1111/j.1756-1051.2013.00233.x.
- GUO, JUN; YU, XIAOCHENG; YIN, HUAYAN; LIU, GUOJUAN; LI, ANFEI; WANG, HONGWEI; KONG, LINGRANG (2016):  
**Phylogenetic Relationships of *Thinopyrum* and *Triticum* Species revealed by SCoT and Cddp Markers.**  
 In: Plant Systematics and Evolution 302 (9), p. 1301–1309. DOI: 10.1007/s00606-016-1332-4.
- HAMASHA, HASSAN R.; HAGEN, K. BERNHARD VON; RÖSER, MARTIN (2012):  
***Stipa* (Poaceae) and allies in the Old World: Molecular Phylogenetics realigns Genus Circumscription and gives Evidence on the Origin of American and Australian Lineages.**  
 In: Plant Systematics and Evolution 298 (2), p. 351–367. DOI: 10.1007/s00606-011-0549-5.
- HARDION, LAURENT; VERLAQUE, RÉGINE; BAUMEL, ALEX; JUIN, MARIANICK; VILA, BRUNO (2012):  
**Revised Systematics of Mediterranean *Arundo* (Poaceae) based on AFLP Fingerprints and Morphology.**  
 In: Taxon 61 (6), p. 1217–1226.
- HEMPEL, WERNER (2011):  
**Revision und Phylogenie der Arten der Gattung *Melica* L. (Poaceae) in Eurasien und Nordafrika.**  
 In: Feddes Repertorium 122 (1-2), p. 1–253. DOI: 10.1002/fedr.201100029.
- HOCHBACH, ANNE; SCHNEIDER, JULIA; RÖSER, MARTIN (2015):  
**A multi-locus Analysis of phylogenetic Relationships within grass Subfamily Pooideae (Poaceae) inferred from Sequences of nuclear single copy Gene Regions compared with Plastid DNA.**  
 In: Molecular Phylogenetics and Evolution 87, p. 14–27. DOI: 10.1016/j.ympev.2015.03.010.

- HODGE, CURTIS D.; WANG, HUAN; SUN, GEN-LOU (2010):**  
**Phylogenetic Analysis of the maternal Genome of tetraploid StStYY *Elymus* (Triticeae: Poaceae) Species and the monogenomic Triticeae based on rps16 Sequence Data.**  
In: *Plant Science* 178 (5), p. 463–468. DOI: 10.1016/j.plantsci.2010.03.002.
- HODGE, JOHN G.; KELLOGG, ELIZABETH A. (2014):**  
**Patterns of Inflorescence Development of three Prairie Grasses (Andropogoneae, Poaceae).**  
In: *International Journal of Plant Sciences* 175 (9), p. 963–974. DOI: 10.1086/677652.
- HODKINSON, TREVOR R.; CHASE, MARK W.; LLEDÓ, M. DOLORES; SALAMIN, NICOLAS; RENVOIZE, STEPHEN A. (2002):**  
**Phylogenetics of *Miscanthus*, *Saccharum* and related Genera (Saccharinae, Andropogoneae, Poaceae) based on DNA Sequences from ITS nuclear ribosomal DNA and Plastid trnL-Intron and trnL-F intergenic spacers.**  
In: *Journal of Plant Research* 115 (5), p. 381–392. DOI: 10.1007/s10265-002-0049-3.
- HODKINSON, TREVOR R.; CHASE, MARK W.; TAKAHASHI, CHIGUSA; LEITCH, ILIA J.; BENNETT, MICHAEL D.; RENVOIZE, STEPHEN A. (2002):**  
**The use of DNA Sequencing (Its and trnL-F), AFLP, and fluorescent in situ Hybridization to Study allopolyploid *Miscanthus* (Poaceae).**  
In: *American Journal of Botany* 89 (2), p. 279–286. DOI: 10.3732/ajb.89.2.279.
- HODKINSON, TREVOR R.; SALAMIN, NICOLAS; CHASE, MARK W. (2007):**  
**Large Trees, Supertrees, and Diversification of the Grass Family.**  
In: *Aliso* 23 (1), p. 248–258. DOI: 10.5642/aliso.20072301.19.
- HSIAO, C.; JACOBS, SURREY W.L.; BARKER, NIGEL P.; CHATTERTON, N. J. (1998):**  
**A molecular Phylogeny of the Subfamily Arundinoideae (Poaceae) based on Sequences of rDNA.**  
In: *Australian Systematic Botany* 11 (1), p. 41–52. DOI: 10.1071/SB97001.
- HUNTER, ANGELA M.; ORLOVICH, DAVID A.; LLOYD, KELVIN M.; LEE, WILLIAM G.; MURPHY, DANIEL J. (2004):**  
**The generic Position of *Austrofestuca littoralis* and the Reinstatement of *Hookerochloa* and *Festucella* (Poaceae) based on Evidence from nuclear (ITS) and Chloroplast (trnL-trnF) DNA Sequences.**  
In: *New Zealand Journal of Botany* 42 (2), p. 253–262. DOI: 10.1080/0028825X.2004.9512902.
- INGRAM, AMANDA L.; DOYLE, JEFF J. (2007):**  
***Eragrostis* (Poaceae): Monophyly and Infrageneric Classification.**  
In: *Aliso* 23 (1), p. 595–604.
- JACOBS, SURREY W.L. (2001):**  
**The Genus *Lachnagrostis* (Gramineae) in Australia.**  
In: *Telopea* 9 (3), p. 439–448.
- JACOBS, SURREY W.L.; BAYER, RANDALL J.; EVERETT, JOY; ARRIAGA, MIRTA; BARKWORTH, MARY E.; SABIN-BADEREAU, ALEXANDRU ET AL. (2007):**  
**Systematics of the Tribe Stipeae (Gramineae) using molecular Data.**  
In: *Aliso* 23 (1), p. 349–361. DOI: 10.5642/aliso.20072301.28.
- JONES, SAMUEL S.; BURKE, SEAN V.; DUVALL, MELVIN R. (2014):**  
**Phylogenomics, molecular Evolution, and estimated Ages of Lineages from the deep Phylogeny of Poaceae.**  
In: *Plant Systematics and Evolution* 300 (6), p. 1421–1436. DOI: 10.1007/s00606-013-0971-y.

- KELCHNER, SCOT A. (2013):**  
**Higher level phylogenetic Relationships within the Bamboos (Poaceae: Bambusoideae) based on five Plastid Markers.**  
In: *Molecular Phylogenetics and Evolution* 67 (2), p. 404–413. DOI: 10.1016/j.ympev.2013.02.005.
- KELLOGG, ELIZABETH A. (2009):**  
**The evolutionary History of Ehrhartoideae, Oryzeae, and *Oryza*.**  
In: *Rice* 2 (1), p. 1–14. DOI: 10.1007/s12284-009-9022-2.
- KELLOGG, ELIZABETH A.; HISER, KENNETH M.; DOUST, ANDREW N. (2004):**  
**Taxonomy, Phylogeny, and Inflorescence Development of the Genus *Ixophorus* (Panicoideae: Poaceae).**  
In: *International Journal of Plant Sciences* 165 (6), p. 1089–1105.
- KIM, SEONHEE; KIM, CHANG-SEOK; LEE, JEONGRAN; LEE, IN-YONG; CHUNG, YOUNG-JAE; CHO, MYONG-SUK; KIM, SEUNG-CHUL (2015):**  
**Phylogenetic Relationships among Species of *Setaria* (Paniceae; Panicoideae; Poaceae) in Korea: Insights from nuclear (Its and kn1) and Chloroplast DNA Sequence Data.**  
In: *Plant Systematics and Evolution* 301 (2), p. 725–736. DOI: 10.1007/s00606-014-1111-z.
- KINNEY, MICHAEL S.; COLUMBUS, TRAVIS J.; FRIAR, ELIZABETH A. (2007):**  
**Dicliny in *Bouteloua* (Poaceae: Chloridoideae): Implications for the Evolution of Dioecy.**  
In: *Aliso* 23 (1), p. 605–614.
- KOBAYASHI, MIKIO (2015):**  
**Phylogeny, Speciation, and Distribution of the Japanese dwarf Bamboos of Genus *Sasa* and allies.**  
In: *Plant Species Biology* 30 (1), p. 45–62. DOI: 10.1111/1442-1984.12058.
- KRISTIANSEN, KIM A.; CILIEBORG, MALENE; DRÁBKOVÁ, LENKA; JØRGENSEN, TINA; PETERSEN, GITTE; SEBERG, OLE (2005):**  
**DNA Taxonomy - the Riddle of *Oxychloe* (Juncaceae).**  
In: *Systematic Botany* 30 (2), p. 284–289.
- LAMBERTINI, C.; GUSTAFSSON, MATS H.G.; FRYDENBERG, J.; LISSNER, J.; SPERANZA, M.; BRIX, H. (2006):**  
**A phylogeographic Study of the cosmopolitan Genus *Phragmites* (Poaceae) based on AFLPs.**  
In: *Plant Systematics and Evolution* 258 (3-4), p. 161–182. DOI: 10.1007/s00606-006-0412-2.
- LEI, YING-XIA; LIU, JIA; FAN, XING; SHA, LI-NA; WANG, YI; KANG, HOU-YANG ET AL. (2018):**  
**Phylogeny and maternal Donor of *Roegneria* and its affinitive Genera (Poaceae: Triticeae) based on Sequence Data for two Chloroplast DNA Regions (ndhF and trnH-psbA ).**  
In: *Journal of Systematics and Evolution* 56 (2), p. 105–119. DOI: 10.1111/jse.12291.
- LIAO, JIN-QIU; ROSS, LORETTA; FAN, XING; SHA, LI-NA; KANG, HOU-YANG; ZHANG, HAI-QIN ET AL. (2013):**  
**Phylogeny and maternal Donors of the tetraploid Species with St Genome (Poaceae: Triticeae) inferred from CoxII and ITS Sequences.**  
In: *Biochemical Systematics and Ecology* 50, p. 277–285. DOI: 10.1016/j.bse.2013.05.004.
- LINDER, HANS PETER; BAEZA, MARCELO; BARKER, NIGEL P.; GALLEY, CHLOÉ; HUMPHREYS, AELYS M.; LLOYD, KELVIN M. ET AL. (2010):**  
**A generic Classification of the Danthonioideae (Poaceae).**  
In: *Annals of the Missouri Botanical Garden* 97 (3), p. 306–364. DOI: 10.3417/2009006.

- LIU, Q.; ZHANG, D. X.; PETERSON, PAUL M. (2010):  
**Lemma micromorphological Characters in the Chloridoideae (Poaceae) optimized on a molecular Phylogeny.**  
In: South African Journal of Botany 76 (2), p. 196–209. DOI: 10.1016/j.sajb.2009.10.006.
- LIU, QUANLAN; GE, SONG; TANG, HAIBAO; ZHANG, XIANGLIN; ZHU, GENFENG; LU, BAO-RONG (2006):  
**Phylogenetic Relationships in *Elymus* (Poaceae: Triticeae) based on the nuclear ribosomal Internal Transcribed Spacer and Chloroplast trnL-F Sequences.**  
In: the new Phytologist 170 (2), p. 411–420. DOI: 10.1111/j.1469-8137.2006.01665.x.
- LIZARAZU, MABEL A.; NICOLA, MARCELA V.; SALARIATO, DIEGO LEONEL (2014):  
**Taxonomic re-evaluation of *Panicum* Sections *Tuerckheimiana* and *Valida* (Poaceae: Panicoideae) Using morphological and molecular Data.**  
In: Taxon 63 (2), p. 265–274. DOI: 10.12705/632.34.
- LLOYD, KELVIN M.; HUNTER, ANGELA M.; ORLOVICH, DAVID A.; DRAFFIN, SUZANNE J.; STEWART, ALAN V.; LEE, WILLIAM G. (2007):  
**Phylogeny and Biogeography of Endemic *Festuca* (Poaceae) from New Zealand based on Nuclear (ITS) and Chloroplast (trnL–trnF) Nucleotide Sequences.**  
In: Aliso 23 (1), p. 406–419.
- MA, HONG-ZHENG; CAI, ZHE; ZHANG, FU-MIN; ZHANG, HUI; GE, SONG; DAI, SI-LAN; CHEN, WEN-LI (2015):  
**Taxonomic Evaluation of *Miscanthus nudipes* (Poaceae) based on morphological and molecular Evidence.**  
In: Phytotaxa 205 (1), p. 1. DOI: 10.11646/phytotaxa.205.1.1.
- MARKOVA, DRAGOMIRA N.; MASON-GAMER, ROBERTA J. (2015):  
**Diversity, abundance, and evolutionary dynamics of Pong-like transposable elements in Triticeae.**  
In: Molecular Phylogenetics and Evolution 93, p. 318–330. DOI: 10.1016/j.ympev.2015.07.008.
- MARTÍNEZ, ANA MARÍA SORIANO; SALAZAR, GERARDO A.; ARANDA, PATRICIA DÁVILA (2007):  
**Phylogenetic Relationships of *Zeugites* (Poaceae: Centothecoideae) inferred from Plastid and Nuclear DNA Sequences and Morphology.**  
In: Systematic Botany 32 (4), p. 722–730.
- MASON-GAMER, ROBERTA J. (2005):  
**The {beta}-Amylase Genes of Grasses and a phylogenetic Analysis of the Triticeae (Poaceae).**  
In: American Journal of Botany 92 (6), p. 1045–1058. DOI: 10.3732/ajb.92.6.1045.
- MATHEWS, SARAH; TSAI, ROCKY C.; KELLOGG, ELIZABETH A. (2000):  
**Phylogenetic Structure in the grass Family (Poaceae): Evidence from the nuclear Gene Phytochrome B.**  
In: American Journal of Botany 87 (1), p. 96–107. DOI: 10.2307/2656688.
- MEIMBERG, HARALD; RICE, KEVIN J.; MILAN, NEIL F.; NJOKU, COLLINS C.; MCKAY, JOHN K. (2009):  
**Multiple Origins promote the ecological Amplitude of allopolyploid *Aegilops* (Poaceae).**  
In: American Journal of Botany 96 (7), p. 1262–1273. DOI: 10.3732/ajb.0800345.
- MORRIS, LEAH M.; DUVALL, MELVIN R. (2010):  
**The Chloroplast Genome of *Anomochloa marantoidea* (Anomochlooideae; Poaceae) comprises a mixture of grass-like and unique Features.**

In: American Journal of Botany 97 (4), p. 620–627. DOI: 10.3732/ajb.0900226.

**MORRONE, OSVALDO; AAGESEN, LONE; SCATAGLINI, MARIA AMALIA; SALARIATO, DIEGO LEONEL; DENHAM, SILVIA S.; CHEMISQUY, MARIA AMELIA ET AL. (2012):**

**Phylogeny of the Paniceae (Poaceae: Panicoideae): integrating Plastid DNA Sequences and Morphology into a new Classification.**

In: Cladistics 28 (4), p. 333–356. DOI: 10.1111/j.1096-0031.2011.00384.x.

**MORRONE, OSVALDO; DENHAM, SILVIA S.; ALISCIONI, SANDRA S.; ZULOAGA, FERNANDO OMAR (2008):**

***Parodiophyllochloa*, a new Genus segregated from *Panicum* (Paniceae, Poaceae) based on morphological and molecular Data.**

In: Systematic Botany 33 (1), p. 66–76. DOI: 10.1600/036364408783887393.

**MORRONE, OSVALDO; SCATAGLINI, MARIA AMALIA; ZULOAGA, FERNANDO OMAR (2007):**

***Cyphonanthus*, a new Genus segregated from *Panicum* (Poaceae: Panicoideae: Paniceae) based on morphological, anatomical and molecular Data.**

In: Taxon 56 (2), p. 521–532.

**NAGHAVI, MOHAMMAD REZA; RAD, MARJAN BEHZADII; RIAHI, MEHRSHID; TALEIE, ALIREZA (2013):**

**Phylogenetic Analysis in some *Hordeum* Species (Triticeae; Poaceae) based on two single-copy nuclear Genes encoding Acetyl-CoA Carboxylase.**

In: Biochemical Systematics and Ecology 47, p. 148–155. DOI: 10.1016/j.bse.2012.10.007.

**NASERNAKHAEI, FATEMEH; RAHIMINEJAD, MOHAMMAD REZA; SAEIDI, HOJJATOLLAH; TAVASSOLI, MANOOCHEHR (2015):**

**Phylogenetic Relationships among the Iranian *Triticum* diploid Gene Pool as inferred from the loci *Acc1* and *Pgk1*.**

In: Phytotaxa 201 (2), p. 111. DOI: 10.11646/phytotaxa.201.2.1.

**NEVES, SUSANA S.; SWIRE-CLARK, GINGER; HILU, KHIDIR W.; BAIRD, WM VANCE (2005):**

**Phylogeny of *Eleusine* (Poaceae: Chloridoideae) based on nuclear ITS and Plastid *trnT-trnF* Sequences.**

In: Molecular Phylogenetics and Evolution 35 (2), p. 395–419. DOI: 10.1016/j.ympev.2004.12.005.

**NG'UNI, DICKSON; GELETA, MULATU; FATIH, MONEIM; BRYNGELSSON, TOMAS (2010):**

**Phylogenetic Analysis of the Genus *Sorghum* based on combined Sequence Data from cpDNA Regions and ITS Generate well-supported Trees with two major Lineages.**

In: Annals of Botany 105 (3), p. 471–480. DOI: 10.1093/aob/mcp305.

**NICOLA, MARCELA V.; LIZARAZU, MABEL A.; SCATAGLINI, MARIA AMALIA (2015):**

**Phylogenetic Analysis and taxonomic Position of Section *Verrucosa* of *Panicum* and its Relationship with Taxa of the *Sacciolepis-Trichanthecium* Clade (Poaceae: Panicoideae: Paniceae).**

In: Plant Systematics and Evolution 301 (9), p. 2247–2260. DOI: 10.1007/s00606-015-1227-9.

**OLIVEIRA, REYJANE PATRÍCIA; CLARK, LYNN G.; SCHNADELBACH, ALESSANDRA SELBACH; MONTEIRO, SILVANA HELENA N.; BORBA, EDUARDO L.; LONGHI-WAGNER, HILDA MARIA; VAN DEN BERG, CÁSSIO (2014):**

**A molecular Phylogeny of *Raddia* and its allies within the Tribe Olyreae (Poaceae, Bambusoideae) based on noncoding Plastid and nuclear Spacers.**

In: Molecular Phylogenetics and Evolution 78, p. 105–117. DOI: 10.1016/j.ympev.2014.04.012.

**PATTANAIAK, SWAPNENDU; HALL, JOHN B. (2011):**

**Molecular Evidence for Polyphyly in the woody Bamboo Genus *Dendrocalamus* (Subtribe Bambusinae).**

In: *Plant Systematics and Evolution* 291 (1-2), p. 59–67. DOI: 10.1007/s00606-010-0380-4.

PENG, SHENG; YANG, HAN-QI; LI, DE-ZHU (2008):

**Highly heterogeneous generic Delimitation within the temperate Bamboo Clade (Poaceae: Bambusoideae): Evidence from GBSSI and ITS Sequences.**

In: *Taxon* 57 (3), p. 799–810. DOI: 10.1002/tax.573011.

PENG, YUAN-YING; WEI, YU-MING; BAUM, BERNARD R.; JIANG, QIAN-TAO; LAN, XIU-JIN; DAI, SHOU-FEN; ZHENG, YOU-LIANG (2010):

**Phylogenetic Investigation of *Avena* diploid Species and the maternal Genome Donor of *Avena* Polyploids.**

In: *Taxon* 59 (5), p. 1472–1482.

PERSSON, NANNIE; RYDIN, CATARINA (2016):

**Phylogenetic Relationships of the '*Briza* complex' to other members of the Subfamily Pooideae (Poaceae).**

In: *Plant Ecology and Evolution* 149 (2), p. 216–227. DOI: 10.5091/plecevo.2016.1194.

PETER LINDER, H.; BOUCHENAK-KHELLADI, YANIS (2017):

**Adaptive Radiations should not be simplified: the case of the danthonioid Grasses.**

In: *Molecular Phylogenetics and Evolution* 117, p. 179–190. DOI: 10.1016/j.ympev.2017.10.003.

PETERSEN, GITTE; SEBERG, OLE; BADEN, C. (2004):

**A phylogenetic Analysis of the Genus *Psathyrostachys* (Poaceae) based on one nuclear Gene, three Plastid Genes, and Morphology.**

In: *Plant Systematics and Evolution* 249 (1-2), p. 99–110. DOI: 10.1007/s00606-004-0196-1.

PETERSON, PAUL M.; ROMASCHENKO, KONSTANTIN; ARRIETA, YOLANDA HERRERA (2014):

**A molecular Phylogeny and Classification of the Cteniinae, Farragininae, Gouiniinae, Gymnopogoninae, Perotidinae, and Trichoneurinae (Poaceae: Chloridoideae: Cynodonteae).**

In: *Taxon* 63 (2), p. 275–286. DOI: 10.12705/632.35.

PETERSON, PAUL M.; ROMASCHENKO, KONSTANTIN; ARRIETA, YOLANDA HERRERA (2015):

**A molecular Phylogeny and Classification of the Eleusininae with a new Genus, *Micrachne* (Poaceae: Chloridoideae: Cynodonteae).**

In: *Taxon* 64 (3), p. 445–467. DOI: 10.12705/643.5.

PETERSON, PAUL M.; ROMASCHENKO, KONSTANTIN; ARRIETA, YOLANDA HERRERA; SAARELA, JEFFERY M. (2014):

**A molecular Phylogeny and new subgeneric Classification of *Sporobolus* (Poaceae: Chloridoideae: Sporobolinae).**

In: *Taxon* 63 (6), p. 1212–1243. DOI: 10.12705/636.19.

PETERSON, PAUL M.; ROMASCHENKO, KONSTANTIN; ARRIETA, YOLANDA HERRERA (2015):

**Phylogeny and subgeneric Classification of *Bouteloua* with a new species, *B. herrera-arrietae* (Poaceae: Chloridoideae: Cynodonteae: Boutelouinae).**

In: *Journal of Systematics and Evolution* 53 (4), p. 351–366. DOI: 10.1111/jse.12159.

PETERSON, PAUL M.; ROMASCHENKO, KONSTANTIN; BARKER, NIGEL P.; LINDER, HANS PETER (2011):

**Centropodieae and *Ellisochloa*, a new Tribe and Genus in Chloridoideae (Poaceae).**

In: *Taxon* 60 (4), p. 1113–1122.

PETERSON, PAUL M.; ROMASCHENKO, KONSTANTIN; HERRERA ARRIETA, YOLANDA (2016):



**A molecular Phylogeny and Classification of the Cynodonteae (Poaceae: Chloridoideae) with four new Genera: *Orthacanthus*, *Triplasiella*, *Tripogonella*, and *Zaqiqah*; three new Subtribes: Dactylocteniinae, Orininae, and Zaqiqahinae; and a subgeneric Classification of *Distichlis*.**

In: *Taxon* 65 (6), p. 1263–1287. DOI: 10.12705/656.4.

PETERSON, PAUL M.; ROMASCHENKO, KONSTANTIN; JOHNSON, GABRIEL (2010):

**A Classification of the Chloridoideae (Poaceae) based on multi-gene phylogenetic Trees.**

In: *Molecular Phylogenetics and Evolution* 55 (2), p. 580–598. DOI: 10.1016/j.ympev.2010.01.018.

PETERSON, PAUL M.; ROMASCHENKO, KONSTANTIN; JOHNSON, GABRIEL (2010):

**A Phylogeny and Classification of the Muhlenbergiinae (Poaceae: Chloridoideae: Cynodonteae) based on Plastid and nuclear DNA Sequences.**

In: *American Journal of Botany* 97 (9), p. 1532–1554. DOI: 10.3732/ajb.0900359.

PETERSON, PAUL M.; ROMASCHENKO, KONSTANTIN; SNOW, NEIL; JOHNSON, GABRIEL (2012):

**A molecular Phylogeny and Classification of *Leptochloa* (Poaceae: Chloridoideae: Chlorideae) sensu lato and related Genera.**

In: *Annals of Botany* 109 (7), p. 1317–1330. DOI: 10.1093/aob/mcs077.

PETERSON, PAUL M.; VEGA, ISIDORO SÁNCHEZ (2007):

***Eragrostis* (Poaceae: Chloridoideae: Eragrostideae: Eragrostidinae) of Peru.**

In: *Annals of the Missouri Botanical Garden* 94 (4), p. 745–790. DOI: 10.3417/0026-6493(2007)94[745:EPCEE0]2.0.CO;2.

PIMENTEL, MANUEL; SAHUQUILLO, ELVIRA; CATALÁN, PILAR (2007):

**Genetic Diversity and spatial correlation Patterns unravel the biogeographical History of the European sweet vernal Grasses (*Anthoxanthum* L., Poaceae).**

In: *Molecular Phylogenetics and Evolution* 44 (2), p. 667–684. DOI: 10.1016/j.ympev.2007.04.006.

PIRIE, MICHAEL D.; HUMPHREYS, AELYS M.; BARKER, NIGEL P.; LINDER, HANS PETER (2009):

**Reticulation, Data Combination, and inferring evolutionary History: an Example from Danthonioideae (Poaceae).**

In: *Systematic Biology* 58 (6), p. 612–628. DOI: 10.1093/sysbio/syp068.

PLEINES, THEKLA; BLATTNER, FRANK R. (2008):

**Phylogeographic Implications of an AFLP Phylogeny of the American diploid *Hordeum* Species (Poaceae: Triticeae).**

In: *Taxon* 57 (3), p. 875–881. DOI: 10.1002/tax.573016.

QUINTANAR, ALEJANDRO; CASTROVIEJO, SANTIAGO; CATALÁN, PILAR (2007):

**Phylogeny of the Tribe Aveneae (Pooideae, Poaceae) inferred from Plastid trnT-F and nuclear ITS Sequences.**

In: *American Journal of Botany* 94 (9), p. 1554–1569. DOI: 10.3732/ajb.94.9.1554.

RAHMANIAN, S.; SAEIDI, HOJJATOLLAH; ASSADI, MOSTAFA; RAHIMINEJAD, MOHAMMAD REZA (2014):

**A taxonomic Revision of the Genus *Eremopoa* Roschv. (Poaceae, Poaeae) in Iran.**

In: *Iranian Journal of Botany* 20 (1), p. 8–15.

REINHEIMER, R.; VEGETTI, A. C. (2008):

**Inflorescence Diversity and Evolution in the PCK Clade (Poaceae: Panicoideae: Paniceae).**

In: *Plant Systematics and Evolution* 275 (3-4), p. 133–167. DOI: 10.1007/s00606-008-0057-4.

- ROMASCHENKO, KONSTANTIN; PETERSON, PAUL M.; SORENG, ROBERT J.; FUTORNA, OKSANA; SUSANNA, ALFONSO (2011):  
**Phylogenetics of *Piptatherum* s.l. (Poaceae: Stipeae): Evidence for a new Genus, *Piptatheropsis*, and Resurrection of *Patis*.**  
 In: *Taxon* 60 (6), p. 1703–1716.
- ROMASCHENKO, KONSTANTIN; PETERSON, PAUL M.; SORENG, ROBERT J.; GARCIA-JACAS, NÚRIA; FUTORNA, OKSANA; SUSANNA, ALFONSO (2012):  
**Systematics and Evolution of the needle Grasses (Poaceae: Pooideae: Stipeae) based on Analysis of multiple Chloroplast loci, ITS, and Lemma Micromorphology.**  
 In: *Taxon* 61 (1), p. 18–44.
- ROUSSEAU, HÉLÈNE; ROUSSEAU-GUEUTIN, MATHIEU; DAUVERGNE, XAVIER; BOUTTE, JULIEN; SIMON, GAËLLE; MARNET, NATHALIE ET AL. (2017):  
**Evolution of DMSP (Dimethylsulfoniopropionate) Biosynthesis Pathway: Origin and phylogenetic Distribution in polyploid *Spartina* (Poaceae, Chloridoideae).**  
 In: *Molecular Phylogenetics and Evolution* 114, p. 401–414. DOI: 10.1016/j.ympev.2017.07.003.
- ROUSSEAU-GUEUTIN, MATHIEU; BELLOT, SIDONIE; MARTIN, G. E.; BOUTTE, J.; CHELAIFA, H.; LIMA, O. ET AL. (2015):  
**The Chloroplast Genome of the hexaploid *Spartina maritima* (Poaceae, Chloridoideae): Comparative Analyses and molecular Dating.**  
 In: *Molecular Phylogenetics and Evolution* 93, p. 5–16. DOI: 10.1016/j.ympev.2015.06.013.
- RUA, GABRIEL H.; SPERANZA, PABLO R.; VAIO, MAGDALENA; ARAKAKI, MÓNICA (2010):  
**A phylogenetic Analysis of the Genus *Paspalum* (Poaceae) based on cpDNA and Morphology.**  
 In: *Plant Systematics and Evolution* 288 (3-4), p. 227–243. DOI: 10.1007/s00606-010-0327-9.
- RUIZ-SANCHEZ, EDUARDO (2015):  
**Parametric and non-parametric Species Delimitation methods Result in the Recognition of two new Neotropical woody Bamboo Species.**  
 In: *Molecular Phylogenetics and Evolution* 93, p. 261–273. DOI: 10.1016/j.ympev.2015.08.004.
- RUIZ-SANCHEZ, EDUARDO; SOSA, VICTORIA (2015):  
**Origin and Evolution of fleshy Fruit in woody Bamboos.**  
 In: *Molecular Phylogenetics and Evolution* 91, p. 123–134. DOI: 10.1016/j.ympev.2015.05.020.
- RUIZ-SANCHEZ, EDUARDO; SOSA, VICTORIA; MEJÍA-SAULES, M. TERESA (2011):  
**Molecular Phylogenetics of the Mesoamerican Bamboo *Olmeca* (Poaceae, Bambuseae): Implications for Taxonomy.**  
 In: *Taxon* 60 (1), p. 89–98.
- RUIZ-SANCHEZ, EDUARDO; SOSA, VICTORIA; MEJÍA-SAULES, M. TERESA (2008):  
**Phylogenetics of *Otatea* inferred from Morphology and Chloroplast DNA Sequence Data, and Recircumscription of *Guaduinae* (Poaceae: Bambusoideae).**  
 In: *Systematic Botany* 33 (2), p. 277–283. DOI: 10.1600/036364408784571644.
- SAARELA, JEFFERY M.; BULL, ROGER D.; PARADIS, MICHEL J.; EBATA, SHARON N.; PAUL, M. PETERSON; SORENG, ROBERT J.; PASZKO, BEATA (2017):  
**Molecular Phylogenetics of cool-season Grasses in the Subtribes Agrostidinae, Anthoxanthinae, Aveninae, Brizinae, Calothecinae, Koeleriinae and Phalaridinae (Poaceae, Pooideae, Poaeae, Poaeae Chloroplast Group 1).**  
 In: *PhytoKeys* (87), p. 1–139. DOI: 10.3897/phytokeys.87.12774.
- SAARELA, JEFFERY M.; GRAHAM, SEAN W. (2010):

- Inference of phylogenetic Relationships among the subfamilies of Grasses (Poaceae: Poales) using meso-scale exemplar-based Sampling of the Plastid Genome.**  
In: *Botany* 88 (1), p. 65–84. DOI: 10.1139/B09-093.
- SAARELA, JEFFERY M.; PETERSON, PAUL M.; KEANE, RYAN M.; CAYOUILLE, JACQUES; GRAHAM, SEAN W. (2007): Molecular Phylogenetics of *Bromus* (Poaceae: Pooideae) based on Chloroplast and Nuclear DNA Sequence Data.**  
In: *Aliso* 23 (1), p. 450–467.
- SAARELA, JEFFERY M.; PETERSON, PAUL M.; VALDÉS-REYNA, JESUS (2014): A taxonomic Revision of *Bromus* (Poaceae: Pooideae: Bromeae) in México and Central America.**  
In: *Phytotaxa* 185 (1), p. 1. DOI: 10.11646/phytotaxa.185.1.1.
- SALAMIN, NICOLAS; HODKINSON, TREVOR R.; SAVOLAINEN, VINCENT (2002): Building Supertrees: an Empirical Assessment using the Grass Family (Poaceae).**  
In: *Systematic Biology* 51 (1), p. 136–150.
- SALARIATO, DIEGO LEONEL; GIUSSANI, LILIANA M.; MORRONE, OSVALDO; ZULOAGA, FERNANDO OMAR (2009): Rupichloa, a new Genus segregated from *Urochloa* (Poaceae) based on morphological and molecular Data.**  
In: *Taxon* 58 (2), p. 381–391. DOI: 10.1002/tax.582006.
- SALARIATO, DIEGO LEONEL; MORRONE, OSVALDO; ZULOAGA, FERNANDO OMAR (2012): *Mayariochloa*, a new monotypic Genus segregated from *Scutachne* (Poaceae, Panicoideae, Paniceae).**  
In: *Systematic Botany* 37 (1), p. 105–116. DOI: 10.1600/036364412X616684.
- SÁNCHEZ-KEN, J. GABRIEL; CLARK, LYNN G. (2007): Phylogenetic Relationships within the Centothecoideae + Panicoideae Clade (Poaceae) based on *ndhF* and *rpl16* Intron Sequences and Structural Data.**  
In: *Aliso* 23 (1), p. 487–501.
- SÁNCHEZ-KEN, J. GABRIEL; CLARK, LYNN G. (2010): Phylogeny and a new tribal Classification of the Panicoideae s.l. (Poaceae) based on Plastid and nuclear Sequence Data and structural Data.**  
In: *American Journal of Botany* 97 (10), p. 1732–1748. DOI: 10.3732/ajb.1000024.
- SÁNCHEZ-KEN, J. GABRIEL; CLARK, LYNN G.; KELLOGG, ELIZABETH A.; KAY, ELMA E. (2007): Reinstatement and Emendation of Subfamily Micrairoideae (Poaceae).**  
In: *Systematic Botany* 32 (1), p. 71–80.
- SCATAGLINI, MARIA AMALIA; ZULOAGA, FERNANDO OMAR; GIUSSANI, LILIANA M.; DENHAM, SILVIA S.; MORRONE, OSVALDO (2014): Phylogeny of New World *Paspalum* (Poaceae, Panicoideae, Paspaleae) based on Plastid and nuclear Markers.**  
In: *Plant Systematics and Evolution* 300 (5), p. 1051–1070. DOI: 10.1007/s00606-013-0944-1.
- SCHNEIDER, JULIA; DÖRING, ELKE; HILU, KHIDIR W.; RÖSER, MARTIN (2009): Phylogenetic Structure of the Grass Subfamily Pooideae based on Comparison of Plastid *matK* gene–3'trnK Exon and nuclear ITS Sequences.**  
In: *Taxon* 58 (2), p. 405–424.
- SCHNEIDER, JULIA; WINTERFELD, GRIT; RÖSER, MARTIN (2012):**

**Polyphyly of the grass Tribe Hainardieae (Poaceae: Pooideae): Identification of its different Lineages based on molecular Phylogenetics, including morphological and cytogenetic Characteristics.**

In: *Organisms Diversity and Evolution* 12 (2), p. 113–132. DOI: 10.1007/s13127-012-0077-3.

SCLOVICH, SERGIO E.; GIUSSANI, LILIANA M.; CIALDELLA, ANA MARÍA; SEDE, SILVANA M. (2015):

**Phylogenetic Analysis of *Jarava* (Poaceae, Pooideae, Stipeae) and related Genera: testing the value of the awn Indumentum in the Circumscription of *Jarava*.**

In: *Plant Systematics and Evolution* 301 (6), p. 1625–1641. DOI: 10.1007/s00606-014-1175-9.

SEBERG, OLE; PETERSEN, GITTE (2007):

**Phylogeny of Triticeae (Poaceae) based on three Organelle Genes, two Single-Copy nuclear Genes, and Morphology.**

In: *Aliso* 23 (1), p. 362–371.

SEDE, SILVANA M.; MORRONE, OSVALDO; ALISCIONI, SANDRA S.; GIUSSANI, LILIANA M.; ZULOAGA, FERNANDO OMAR (2009):

***Oncorachis* and *Sclerochlamys*, two new segregated Genera from *Streptostachys* (Poaceae, Panicoideae, Paniceae): a Revision based on molecular, morphological and anatomical Characters.**

In: *Taxon* 58 (2), p. 365–374.

SEDE, SILVANA M.; MORRONE, OSVALDO; GIUSSANI, LILIANA M.; ZULOAGA, FERNANDO OMAR (2008):

**Phylogenetic Studies in the Paniceae (Poaceae): a Realignment of Section *Lorea* of *Panicum*.**

In: *Systematic Botany* 33 (2), p. 284–300. DOI: 10.1600/036364408784571626.

SEDE, SILVANA M.; ZULOAGA, FERNANDO OMAR; MORRONE, OSVALDO (2009):

**Phylogenetic Studies in the Paniceae (Poaceae-Panicoideae): *Ocellochloa*, a new Genus from the New World.**

In: *Systematic Botany* 34 (4), p. 684–692. DOI: 10.1600/036364409790139655.

SHA, LI-NA; FAN, XING; LI, JUN; LIAO, JIN-QIU; ZENG, JIAN; WANG, YI ET AL. (2017):

**Contrasting evolutionary Patterns of multiple Loci uncover new Aspects in the Genome Origin and evolutionary History of *Leymus* (Triticeae; Poaceae).**

In: *Molecular Phylogenetics and Evolution* 114, p. 175–188. DOI: 10.1016/j.ympev.2017.05.015.

SHA, LI-NA; FAN, XING; ZHANG, HAI-QIN; KANG, HOU-YANG; WANG, YI; WANG, XIAO-LI ET AL. (2016):

**Phylogeny and molecular Evolution of the *Dmc1* Gene in the polyploid Genus *Leymus* (Triticeae: Poaceae) and its diploid Relatives.**

In: *Journal of Systematics and Evolution* 54 (3), p. 250–263. DOI: 10.1111/jse.12188.

SILVA, CHRISTIAN; SNAK, CRISTIANE; SCHNADELBACH, ALESSANDRA SELBACH; VAN DEN BERG, CÁSSIO; OLIVEIRA, REYJANE PATRÍCIA (2015):

**Phylogenetic Relationships of *Echinolaena* and *Ichnanthus* within Panicoideae (Poaceae) reveal two new Genera of tropical grasses.**

In: *Molecular Phylogenetics and Evolution* 93, p. 212–233. DOI: 10.1016/j.ympev.2015.07.015.

SKENDZIC, ELIZABETH; COLUMBUS, TRAVIS J.; CERROS-TLATILPA, ROSA (2007):

**Phylogenetics of Andropogoneae (Poaceae: Panicoideae) based on Nuclear Ribosomal Internal Transcribed Spacer and Chloroplast *trnL-F* Sequences.**

In: *Aliso* 23 (1), p. 530–544. DOI: 10.5642/aliso.20072301.40.

SNOW, NEIL; PETERSON, PAUL M. (2012):

**Nomenclatural Notes on *Dinebra*, *Diplachne*, *Disakisperma* and *Leptochloa* (Poaceae: Chloridoidea).**

In: Phytoneuron 71, p. 1–2.

**SORENG, ROBERT J.; GILLESPIE, LYNN J.; JACOBS, SURREY W.L. (2009):**

***Saxipoa* and *Sylvipoa* - two new Genera and a new Classification for Australian *Poa* (Poaceae: Poinae).**

In: Australian Systematic Botany 22 (6), p. 401–412. DOI: 10.1071/SB09003.

**SORENG, ROBERT J.; PETERSON, PAUL M.; ROMASCHENKO, KONSTANTIN; DAVIDSE, GERRIT; TEISHER, JORDAN K.; CLARK, LYNN G. ET AL. (2017):**

**A worldwide phylogenetic Classification of the Poaceae (Gramineae) II: An Update and a Comparison of two 2015 Classifications.**

In: Journal of Systematics and Evolution 55 (4), p. 259–290. DOI: 10.1111/jse.12262.

**SORENG, ROBERT J.; PETERSON, PAUL M.; ROMASCHENKO, KONSTANTIN; DAVIDSE, GERRIT; ZULOAGA, FERNANDO OMAR; JUDZIEWICZ, EMMET J. ET AL. (2015):**

**A worldwide phylogenetic Classification of the Poaceae (Gramineae).**

In: Journal of Systematics and Evolution 53 (2), p. 117–137. DOI: 10.1111/jse.12150.

**SOUTO, D. P. FERNÁNDEZ; CATALANO, SANTIAGO A.; TOSTO, D. S.; BERNASCONI, P.; SALA, A.; WAGNER, M.; CORACH, D. (2006):**

**Phylogenetic Relationships of *Deschampsia antarctica* (Poaceae): Insights from nuclear ribosomal ITS.**

In: Plant Systematics and Evolution 261 (1-4), p. 1–9. DOI: 10.1007/s00606-006-0425-x.

**SUN, GEN-LOU; POURKHEIRANDISH, MOHAMMAD; KOMATSUDA, TAKAO (2009):**

**Molecular Evolution and Phylogeny of the Rpb2 Gene in the Genus *Hordeum*.**

In: Annals of Botany 103 (6), p. 975–983. DOI: 10.1093/aob/mcp020.

**SUN, QIAN; LIN, Q. I.; YI, ZI-LI; YANG, ZHI-RONG; ZHOU, FA-SONG (2010):**

**A taxonomic Revision of *Miscanthus* s.l. (Poaceae) from China.**

In: Botanical Journal of the Linnean Society 164 (2), p. 178–220. DOI: 10.1111/j.1095-8339.2010.01082.x.

**SUN, YE; XIA, NIAN-HE; LIN, RUSHUN (2005):**

**Phylogenetic Analysis of *Bambusa* (Poaceae: Bambusoideae) based on Internal Transcribed Spacer Sequences of nuclear ribosomal DNA.**

In: Biochemical Genetics 43 (11-12), p. 603–612. DOI: 10.1007/s10528-005-9117-4.

**SYME, ANNA E.; MURPHY, DANIEL J.; HOLMES, GARETH D.; GARDNER, STUART; FOWLER, RACHAEL; CANTRILL, DAVID J. (2012):**

**An expanded phylogenetic Analysis of *Austrostipa* (Poaceae: Stipeae) to test infrageneric Relationships.**

In: Australian Systematic Botany 25 (1), p. 1–10. DOI: 10.1071/SB10049.

**TANG, LIANG; ZOU, XIN-HUI; ZHANG, LIN-BIN; GE, SONG (2015):**

**Multilocus Species Tree Analyses resolve the ancient Radiation of the Subtribe *Zizaniinae* (Poaceae).**

In: Molecular Phylogenetics and Evolution 84, p. 232–239. DOI: 10.1016/j.ympev.2015.01.011.

**TEERAWATANANON, ATCHARA; JACOBS, SURREY W.L.; HODKINSON, TREVOR R. (2009):**

**Phylogenetics of Panicoideae (Poaceae) based on Chloroplast and nuclear DNA Sequences.**

In: Telopea 13 (1-2), p. 115–142.

**TORRECILLA, PEDRO; LÓPEZ RODRÍGUEZ, JOSE ANGEL; STANCIK, D.; CATALÁN, PILAR (2003):**

**Systematics of *Festuca* L. Sects. *Eskia* Willk., *Pseudatropis* Kriv., *Amphigenes* (Janka) Tzvel., *Pseudoscariosa* Kriv. and *Scariosae* Hack. based on Analysis of morphological Characters and DNA Sequences.**

In: Plant Systematics and Evolution 239 (1-2), p. 113–139. DOI: 10.1007/s00606-002-0265-2.

**TRIPLETT, JIMMY K.; CLARK, LYNN G. (2010):**

**Phylogeny of the Temperate Bamboos (Poaceae: Bambusoideae: Bambuseae) with an Emphasis on *Arundinaria* and Allies.**

In: Systematic Botany 35 (1), p. 102–120. DOI: 10.1600/036364410790862678.

**TYRRELL, CHRISTOPHER D.; SANTOS-GONÇALVES, ANA PAULA; LONDOÑO, XIMENA; CLARK, LYNN G. (2012):**

**Molecular Phylogeny of the arthrostylidioid Bamboos (Poaceae: Bambusoideae: Bambuseae: Arthrostylidiinae) and new Genus *Didymogonyx*.**

In: Molecular Phylogenetics and Evolution 65 (1), p. 136–148. DOI: 10.1016/j.ympev.2012.05.033.

**VERBOOM, GEORGE ANTHONY; NTSOHI, REFILOE; BARKER, NIGEL P. (2006):**

**Molecular Phylogeny of African *Rytidosperma* –affiliated danthonioid Grasses reveals generic Polyphyly and convergent Evolution in Spikelet Morphology.**

In: Taxon 55 (2), p. 337–348. DOI: 10.2307/25065581.

**VORONTSOVA, MARIA S.; SIMON, BRYAN K. (2012):**

**Updating Classifications to reflect Monophyly: 10 to 20 percent of Species names Change in Poaceae.**

In: Taxon 51 (4), p. 735–746.

**VOSHELL, STEPHANIE M.; BALDINI, RICCARDO M.; KUMAR, ROHIT; TATALOVICH, NICHOLAS; HILU, KHIDIR W. (2011):**

**Canary Grasses (*Phalaris*, Poaceae): molecular Phylogenetics, polyploidy and floret Evolution.**

In: Taxon 60 (5), p. 1306–1316.

**WASHBURN, JACOB D.; SCHNABLE, JAMES C.; DAVIDSE, GERRIT; PIRES, J. CHRIS (2015):**

**Phylogeny and photosynthesis of the Grass Tribe Paniceae.**

In: American Journal of Botany 102 (9), p. 1493–1505. DOI: 10.3732/ajb.1500222.

**WELKER, CASSIANO A. D.; SOUZA-CHIES, TATIANA TEIXEIRA DE; LONGHI-WAGNER, HILDA MARIA; PEICHOTO, MYRIAM CAROLINA; MCKAIN, MICHAEL R.; KELLOGG, ELIZABETH A. (2016):**

**Multilocus Phylogeny and phylogenomics of *Eriochrysis* P. Beauv. (Poaceae-Andropogoneae): taxonomic Implications and Evidence of interspecific Hybridization.**

In: Molecular Phylogenetics and Evolution 99, p. 155–167. DOI: 10.1016/j.ympev.2016.02.022.

**WELKER, CASSIANO A. D.; SOUZA-CHIES, TATIANA TEIXEIRA DE; LONGHI-WAGNER, HILDA MARIA; PEICHOTO, MYRIAM CAROLINA; MCKAIN, MICHAEL R.; KELLOGG, ELIZABETH A. (2015):**

**Phylogenetic Analysis of *Saccharum* s.l. (Poaceae; Andropogoneae), with Emphasis on the Circumscription of the South American Species.**

In: American Journal of Botany 102 (2), p. 248–263. DOI: 10.3732/ajb.1400397.

**WHIPPLE, IAN G.; BARKWORTH, MARY E.; BUSHMAN, BRADLEY P. (2007):**

**Molecular Insights into the Taxonomy of *Glyceria* (Poaceae: Meliceae) in North America.**

In: American Journal of Botany 94 (4), p. 551–557. DOI: 10.3732/ajb.94.4.551.

**WINTERFELD, GRIT; SCHNEIDER, JULIA; BECHER, HANNES; DICKIE, JOHN; RÖSER, MARTIN (2015):**

**Karyosystematics of the Australasian stipoid grass *Austrostipa* and related Genera: Chromosome sizes, Ploidy, Chromosome Base Numbers and Phylogeny.**

In: Australian Systematic Botany 28 (3), p. 145–159. DOI: 10.1071/SB14029.

**WÖLK, ALEXANDRA; RÖSER, MARTIN (2013):**

**The new Genus *Trisetopsis* and new Combinations in oat-like Grasses (Poaceae).**

In: Schlechtendalia 25, p. 57–61.

**WÖLK, ALEXANDRA; RÖSER, MARTIN (2014):**

**Polyloid Evolution, intercontinental biogeographical Relationships and Morphology of the recently described African Oat Genus *Trisetopsis* (Poaceae).**

In: Taxon 63 (4), p. 773–788. DOI: 10.12705/634.1.

**WYSOCKI, WILLIAM P.; CLARK, LYNN G.; ATTIGALA, LAKSHMI; RUIZ-SANCHEZ, EDUARDO; DUVAL, MELVIN R. (2015): Evolution of the Bamboos (Bambusoideae; Poaceae): a full plastome phylogenomic Analysis.**

In: BMC Evolutionary Biology 15, p. 50. DOI: 10.1186/s12862-015-0321-5.

**XU, CHONG-MEI; QU, CHANG-YOU; YU, WEN-GUANG; ZHANG, XUE-JIE; LI, FA-ZENG (2009):**

**Phylogenetic Origin of *Beckmannia* (Poaceae) inferred from molecular Evidence.**

In: Journal of Systematics and Evolution 47 (4), p. 305–310. DOI: 10.1111/j.1759-6831.2009.00032.x.

**YAN, CHI; SUN, GEN-LOU (2011):**

**Nucleotide Divergence and genetic Relationships of *Pseudoroegneria* Species.**

In: Biochemical Systematics and Ecology 39 (4-6), p. 309–319. DOI: 10.1016/j.bse.2011.08.009.

**YANG, HAN-QI; PENG, SHENG; LI, DE-ZHU (2007):**

**Generic Delimitations of *Schizostachyum* and its Allies (Gramineae: Bambusoideae) inferred from GBSSI and trnL-F Sequence Phylogenies.**

In: Taxon 56 (1), p. 45–54.

**YANG, HAN-QI; YANG, JUN-BO; PENG, ZHEN-HUA; GAO, JIAN; YANG, YU-MING; PENG, SHENG; LI, DE-ZHU (2008):**

**A molecular phylogenetic and Fruit evolutionary Analysis of the major Groups of the paleotropical woody Bamboos (Gramineae: Bambusoideae) based on nuclear ITS, GBSSI Gene and Plastid trnL-F DNA Sequences.**

In: Molecular Phylogenetics and Evolution 48 (3), p. 809–824. DOI: 10.1016/j.ympev.2008.06.001.

**YANG, JUN-BO; YANG, HAN-QI; LI, DE-ZHU; WONG, KHOON MENG; YANG, YU-MING (2010):**

**Phylogeny of *Bambusa* and its allies (Poaceae: Bambusoideae) inferred from nuclear GBSSI Gene and Plastid psbA-trnH, rpl32-trnL and rps16 Intron DNA Sequences.**

In: Taxon 59 (4), p. 1102–1110.

**ZENG, CHUN-XIA; ZHANG, YU-XIAO; TRIPLETT, JIMMY K.; YANG, JUN-BO; LI, DE-ZHU (2010):**

**Large multi-locus Plastid Phylogeny of the Tribe Arundinarieae (Poaceae: Bambusoideae) reveals ten major Lineages and low Rate of molecular Divergence.**

In: Molecular Phylogenetics and Evolution 56 (2), p. 821–839. DOI: 10.1016/j.ympev.2010.03.041.

**ZHANG, H-Q; FAN, X.; SHA, L-N; ZHANG, C.; YANG, R-W; ZHOU, Y-H (2008):**

**Phylogeny of *Hystrix* and related Genera (Poaceae: Triticeae) based on nuclear rDNA ITS Sequences.**

In: Plant Biology 10 (5), p. 635–642. DOI: 10.1111/j.1438-8677.2008.00065.x.

**ZHANG, XIAN-ZHI; ZENG, CHUN-XIA; MA, PENG-FEI; HAEVERMANS, THOMAS; ZHANG, YU-XIAO; ZHANG, LI-NA ET AL. (2016):**

**Multi-locus Plastid phylogenetic Biogeography supports the Asian Hypothesis of the temperate woody Bamboos (Poaceae: Bambusoideae).**

In: *Molecular Phylogenetics and Evolution* 96, p. 118–129. DOI: 10.1016/j.ympev.2015.11.025.

ZHANG, YU-XIAO; ZENG, CHUN-XIA; LI, DE-ZHU (2012):

**Complex Evolution in Arundinarieae (Poaceae: Bambusoideae): incongruence between Plastid and nuclear GBSSI Gene Phylogenies.**

In: *Molecular Phylogenetics and Evolution* 63 (3), p. 777–797. DOI: 10.1016/j.ympev.2012.02.023.

ZHENG, CHAOHAN; XIA, NIAN-HE; DENG, YUN-FEI (2013):

***Ampelocalamus stoloniformis*, a new Combination for Chinese Bambusoideae (Poaceae).**

In: *Phytotaxa* 135 (1), p. 62. DOI: 10.11646/phytotaxa.135.1.7.

ZIMMERMANN, TANJA; BOCKSBERGER, GAËLLE; BRÜGGEMANN, WOLFGANG; BERBERICH, THOMAS (2013):

**Phylogenetic Relationship and molecular Taxonomy of African Grasses of the Genus *Panicum* inferred from four Chloroplast DNA-Barcodes and nuclear Gene Sequences.**

In: *Journal of Plant Research* 126 (3), p. 363–371. DOI: 10.1007/s10265-012-0538-y.

ZULOAGA, FERNANDO OMAR; MORRONE, OSVALDO; DAVIDSE, GERRIT; PENNINGTON, SUSAN J. (2007):

**Classification and Biogeography of Panicoideae (Poaceae) in the New World.**

In: *Aliso* 23 (1), p. 503–529.

ZULOAGA, FERNANDO OMAR; SALARIATO, DIEGO LEONEL; SCATAGLINI, MARIA AMALIA (2018):

**Molecular Phylogeny of *Panicum* s. str. (Poaceae, Panicoideae, Paniceae) and Insights into its Biogeography and Evolution.**

In: *Public Library of Science One* 13 (2), e0191529. DOI: 10.1371/journal.pone.0191529.

ZULOAGA, FERNANDO OMAR; SALOMÓN, LUCIANA; SCATAGLINI, MARIA AMALIA (2015):

**Phylogeny of Sections *Clavelligerae* and *Pectinatae* of *Panicum* (Poaceae, Panicoideae, Paniceae): establishment of the new Subtribe Dichantheliinae and the Genus *Adenochloa*.**

In: *Plant Systematics and Evolution* 301 (6), p. 1693–1711. DOI: 10.1007/s00606-014-1186-6.

ZULOAGA, FERNANDO OMAR; SCATAGLINI, MARIA AMALIA; MORRONE, OSVALDO (2010):

**A phylogenetic Evaluation of *Panicum* Sects. *Agrostoidea*, *Megista*, *Prionitia* and *Tenera* (Panicoideae, Poaceae): Two new Genera, *Stephostachys* and *Sorengia*.**

In: *Taxon* 59 (5), p. 1535–1546.

## Podocarpaceae

HERBERT, JANE; HOLLINGSWORTH, PETER M.; GARDNER, MARTIN F.; MILL, ROBERT R.; THOMAS, PHILIP I.; JAFFRÉ, TANGUY (2002):

**Conservation genetics and Phylogenetics of New Caledonian *Retrophyllum* (Podocarpaceae) Species.**

In: *New Zealand Journal of Botany* 40 (2), p. 175–188. DOI: 10.1080/0028825X.2002.9512781.

KELCH, DEAN G. (1998):

**Phylogeny of Podocarpaceae: Comparison of Evidence from Morphology and 18s Rdna1.**

In: *American Journal of Botany* 85 (7), p. 986–996.

KELCH, DEAN G. (2002):



**Phylogenetic assessment of the monotypic Genera *Sundacarpus* and *Manoao* (Coniferales: Podocarpaceae) utilising Evidence from 18s rDNA Sequences.**

In: Australian Systematic Botany 15 (1), p. 29–35. DOI: 10.1071/SB01002.

**KNOFF, PATRICK; SCHULZ, CHRISTIAN; LITTLE, DAMON P.; STÜTZEL, THOMAS; STEVENSON, DENNIS WM. (2012):**

**Relationships within Podocarpaceae based on DNA Sequence, anatomical, morphological, and biogeographical Data.**

In: Cladistics 28 (3), p. 271–299. DOI: 10.1111/j.1096-0031.2011.00381.x.

**MILL, ROBERT R. (2015):**

**A Monographic Revision of the Genus *Podocarpus* (Podocarpaceae): II. the Species of the Caribbean Bioregion.**

In: Edinburgh Journal of Botany 72 (1), p. 61–185. DOI: 10.1017/S0960428614000328.

**SINCLAIR, W. T.; MILL, ROBERT R.; GARDNER, MARTIN F.; WOLTZ, P.; JAFFRÉ, TANGUY; PRESTON, JILLIAN ET AL. (2002):**

**Evolutionary Relationships of the New Caledonian heterotrophic Conifer, *Parasitaxus usta* (Podocarpaceae), inferred from Chloroplast trn L-f Intron/spacer and nuclear rDNA ITS2 Sequences.**

In: Plant Systematics and Evolution 233 (1-2), p. 79–104. DOI: 10.1007/s00606-002-0199-8.

## **Podostemaceae**

**FUJINAMI, RIEKO; IMAICHI, RYOKO (2015):**

**Developmental Morphology of flattened shoots in *Dalzellia ubonensis* and *Indodalzellia gracilis* with Implications for the Evolution of diversified shoot morphologies in the Subfamily Tristichoideae (Podostemaceae).**

In: American Journal of Botany 102 (6), p. 848–859. DOI: 10.3732/ajb.1500206.

**KATO, MASAHIRO (2016):**

**Multidisciplinary studies of the Diversity and Evolution in River-weeds.**

In: Journal of Plant Research 129 (3), p. 397–410. DOI: 10.1007/s10265-016-0801-8.

**KATO, MASAHIRO; KITA, YOKO; KOI, SATOSHI (2003):**

**Molecular Phylogeny, Taxonomy and Biogeography of *Malaccotristicha australis* comb. nov. (syn. *Tristicha australis*) (Podostemaceae).**

In: Australian Systematic Botany 16 (2), p. 177–183. DOI: 10.1071/SB02020.

**KELLY, LAURA J.; AMEKA, GABRIEL K.; CHASE, MARK W. (2010):**

**DNA barcoding of African Podostemaceae (river-weeds): A test of proposed Barcode Regions.**

In: Taxon 59 (1), p. 251–260. DOI: 10.1002/tax.591023.

**KHANDURI, PRIYANKA; TANDON, RAJESH; UNIYAL, PREM LAL; BHAT, VISHNU; PANDEY, ARUN KUMAR (2015):**

**Comparative Morphology and molecular Systematics of Indian Podostemaceae.**

In: Plant Systematics and Evolution 301 (3), p. 861–882. DOI: 10.1007/s00606-014-1121-x.

**KITA, YOKO; KATO, M. (2001):**

**Infrafamilial Phylogeny of the aquatic Angiosperm Podostemaceae inferred from the Nucleotide Sequences of the matK Gene.**

In: Plant Biology 3 (2), p. 156–163. DOI: 10.1055/s-2001-12895.

**KOI, SATOSHI; KATO, MASAHIRO (2010):**

**Developmental Morphology of Seedling and Shoot and phylogenetic Relationship of *Diplobryum koyamae* (Podostemaceae).**

In: American Journal of Botany 97 (3), p. 373–387. DOI: 10.3732/ajb.0900157.

- KOI, SATOSHI; KATO, MASAHIRO (2012):  
**A taxonomic Study of Podostemaceae Subfamily Podostemoideae of Laos with phylogenetic Analyses of *Cladopus*, *Paracladopus* and *Polypleurum*.**  
 In: Kew Bulletin 67 (3), p. 331–365. DOI: 10.1007/s12225-012-9399-8.
- KOI, SATOSHI; KITA, YOKO; HIRAYAMA, YUMIKO; RUTISHAUSER, ROLF; HUBER, KONRAD A.; KATO, MASAHIRO (2012):  
**Molecular phylogenetic Analysis of Podostemaceae: Implications for Taxonomy of major Groups.**  
 In: Botanical Journal of the Linnean Society 169 (3), p. 461–492. DOI: 10.1111/j.1095-8339.2012.01258.x.
- KOI, SATOSHI; KITA, YOKO; KATO, MASAHIRO (2008):  
***Paracladopus chanthaburiensis*, a new Species of Podostemaceae from Thailand, with Notes on its Morphology, Phylogeny and Distribution.**  
 In: Taxon 57 (1), p. 201–210. DOI: 10.6027/9789289333788-4-en.
- KOI, SATOSHI; RUTISHAUSER, ROLF; KATO, MASAHIRO (2009):  
**Phylogenetic Relationship and Morphology of *Dalzellia gracilis* (Podostemaceae, Subfamily Tristichoideae) with Proposal of a new Genus.**  
 In: International Journal of Plant Sciences 170 (2), p. 237–246. DOI: 10.1086/595292.
- MOLINE, PHILIP M.; THIV, MIKE; AMEKA, G. K.; GHOGUE, JEAN-PAUL; PFEIFER, EVELIN; RUTISHAUSER, ROLF (2007):  
**Comparative Morphology and molecular Systematics of African Podostemaceae-Podostemoideae, with Emphasis on *Dicraeanthus* and *Ledermannia* from Cameroon.**  
 In: International Journal of Plant Sciences 168 (2), p. 159–180.
- PFEIFER, EVELIN; GROB, VALENTIN; THIV, MIKE; RUTISHAUSER, ROLF (2009):  
***Stonesia ghoguei*, peculiar Morphology of a new Cameroonian Species (Podostemaceae, Podostemoideae).**  
 In: Novon: A Journal for Botanical Nomenclature 19 (1), p. 102–116. DOI: 10.3417/2007080.
- PHILBRICK, C. THOMAS; BOVE, CLAUDIA P.; EDSON JR., THOMAS C. (2009):  
**Monograph of *Castelnavia* (Podostemaceae).**  
 In: Systematic Botany 34 (4), p. 715–729. DOI: 10.1600/036364409790139781.
- PHILBRICK, C. THOMAS; BOVE, CLAUDIA P.; STEVENS, HANNAH I. (2010):  
**Endemism in Neotropical Podostemaceae.**  
 In: Annals of the Missouri Botanical Garden 97 (3), p. 425–456. DOI: 10.3417/2008087.
- SOLTIS, DOUGLAS E.; MORT, MARK E.; SOLTIS, PAMELA S.; HIBSCH-JETTER, CAROLA; ZIMMER, ELIZABETH A.; MORGAN, D. R. (1999):  
**Phylogenetic Relationships of the enigmatic Angiosperm Family Podostemaceae inferred from 18s rDNA and rbcL Sequence Data.**  
 In: Molecular Phylogenetics and Evolution 11 (2), p. 261–272. DOI: 10.1006/mpev.1998.0577.
- THIV, MIKE; GHOGUE, JEAN-PAUL; GROB, VALENTIN; HUBER, KONRAD A.; PFEIFER, EVELIN; RUTISHAUSER, ROLF (2009):  
**How to get off the Mismatch at the generic Rank in African Podostemaceae?**  
 In: Plant Systematics and Evolution 283 (1-2), p. 57–77. DOI: 10.1007/s00606-009-0214-4.
- TIPPERY, NICHOLAS P.; PHILBRICK, C. THOMAS; BOVE, CLAUDIA P.; LES, DONALD H. (2011):  
**Systematics and Phylogeny of Neotropical Riverweeds (Podostemaceae: Podostemoideae).**  
 In: Systematic Botany 36 (1), p. 105–118. DOI: 10.1600/036364411X553180.

## Polemoniaceae

**BELL, CHARLES D.; PATTERSON, ROBERT W. (2000):**

**Molecular Phylogeny and Biogeography of *Linanthus* (Polemoniaceae).**

In: American Journal of Botany 87 (12), p. 1857–1870. DOI: 10.2307/2656838.

**FERGUSON, CAROLYN J.; JANSEN, ROBERT K. (2002):**

**A Chloroplast DNA Phylogeny of eastern *Phlox* (Polemoniaceae): Implications of Congruence and Incongruence with the ITS Phylogeny.**

In: American Journal of Botany 89 (8), p. 1324–1335. DOI: 10.3732/ajb.89.8.1324.

**GOODWILLIE, CAROL (1999):**

**Multiple Origins of Self-compatibility in *Linanthus* Section *Leptosiphon* (Polemoniaceae): phylogenetic Evidence from Internal-transcribed-spacer Sequence Data.**

In: Evolution 53 (5), p. 1387–1395.

**JOHNSON, LEIGH A.; CHAN, LAUREN M.; WEESE, TERRI L.; BUSBY, LISA D.; McMURRY, SAMUEL (2008):**

**Nuclear and cpDNA Sequences combined provide strong Inference of higher phylogenetic Relationships in the Phlox Family (Polemoniaceae).**

In: Molecular Phylogenetics and Evolution 48 (3), p. 997–1012. DOI: 10.1016/j.ympev.2008.05.036.

**JOHNSON, LEIGH A.; SOLTIS, DOUGLAS E. (1995):**

**Phylogenetic Inference in Saxifragaceae sensu stricto and *Gilia* (Polemoniaceae) using matK Sequences.**

In: Annals of the Missouri Botanical Garden 82 (2), p. 149–175.

**MONFILS, ANNA K.; PRATHER, L. ALAN (2010):**

**Phylogeny of *Cantua* (Polemoniaceae): Evidence from Chloroplast and Nuclear DNA Sequence Data.**

In: Systematic Botany 35 (4), p. 877–884. DOI: 10.1600/036364410X539925.

**PORTER, J. MARK; JOHNSON, LEIGH A.; WILKEN, DIETER H. (2010):**

**Phylogenetic Systematics of *Ipomopsis* (Polemoniaceae): Relationships and Divergence Times estimated from Chloroplast and Nuclear DNA Sequences.**

In: Systematic Botany 35 (1), p. 181–200. DOI: 10.1600/036364410790862542.

**PRATHER, L. ALAN; FERGUSON, CAROLYN J.; JANSEN, ROBERT K. (2000):**

**Polemoniaceae Phylogeny and Classification: Implications of Sequence Data from the Chloroplast Gene *ndhF*.**

In: American Journal of Botany 87 (9), p. 1300–1308. DOI: 10.2307/2656723.

**WEESE, TERRI L.; JOHNSON, LEIGH A. (2005):**

**Utility of NADP-dependent Isocitrate Dehydrogenase for species-level evolutionary Inference in Angiosperm Phylogeny: a case Study in *Saltugilia*.**

In: Molecular Phylogenetics and Evolution 36 (1), p. 24–41. DOI: 10.1016/j.ympev.2005.03.004.

**WORLEY, ANNE C.; GHAZVINI, HABIBOLLAH; SCHEMSKE, DOUGLAS W. (2009):**

**A Phylogeny of the Genus *Polemonium* based on Amplified Fragment Length Polymorphism (Aflp) Markers.**

In: Systematic Botany 34 (1), p. 149–161. DOI: 10.1600/036364409787602267.

## **Polygalaceae**

**ABBOTT, RICHARD J.; PASTORE, JOSÉ FLORIANO B. (2015):**

**Preliminary Synopsis of the Genus *Hebecarpa* (Polygalaceae).**

In: Kew Bulletin 70 (3), p. 125. DOI: 10.1007/S12225-015-9589-2.

FOREST, FÉLIX; MANNING, JOHN C. (2006):

**Evidence for Inclusion of South African Endemic *Nylandtia* in *Muraltia* (Polygalaceae).**

In: Systematic Botany 31 (3), p. 525–532.

FOREST, FÉLIX; NÄNNI, INGRID; CHASE, MARK W.; CRANE, PETER R.; HAWKINS, JULIE A. (2007):

**Diversification of a large Genus in a continental Biodiversity Hotspot: temporal and spatial Origin of *Muraltia* (Polygalaceae) in the Cape of South Africa.**

In: Molecular Phylogenetics and Evolution 43 (1), p. 60–74. DOI: 10.1016/j.ympev.2006.08.017.

KERRIGAN, RAELEE A. (2012):

**A Treatment for *Polygala* of northern Australia.**

In: Australian Systematic Botany 25 (2), p. 83–137. DOI: 10.1071/SB08032.

MENNES, CONSTANTIJN B.; MOERLAND, MICHELANGELO S.; RATH, MAGNUS; SMETS, ERIK F.; MERCKX, VINCENT S.F.T. (2015):

**Evolution of Mycoheterotrophy in Polygalaceae: the Case of *Epirixanthes*.**

In: American Journal of Botany 102 (4), p. 598–608. DOI: 10.3732/ajb.1400549.

PASTORE, JOSÉ FLORIANO B. (2012):

***Caamembeca*: generic Status and new name for *Polygala* Subgenus *Ligustrina* (Polygalaceae).**

In: Kew Bulletin 67 (3), p. 435–442. DOI: 10.1007/s12225-012-9360-x.

PASTORE, JOSÉ FLORIANO B. (2016):

***Acanthocladus dichromus*, a new Combination for a South American Polygalaceae.**

In: Phytotaxa 286 (1), p. 54. DOI: 10.11646/phytotaxa.286.1.7.

PASTORE, JOSÉ FLORIANO B.; ABBOTT, RICHARD J. (2012):

**Taxonomic Notes and new Combinations for *Asemeia* (Polygalaceae).**

In: Kew Bulletin 67 (4), p. 801–813. DOI: 10.1007/s12225-012-9397-x.

PASTORE, JOSÉ FLORIANO B.; ABBOTT, RICHARD J.; NEUBIG, KURT M.; WHITTEN, WILLIAM MARK; MASCARENHAS, RENATA B.; MOTA, MICHELLE CHRISTINE ALMEIDA; VAN DEN BERG, CÁSSIO (2017):

**A molecular Phylogeny and taxonomic Notes in *Caamembeca* (Polygalaceae).**

In: Systematic Botany 42 (1), p. 54–62. DOI: 10.1600/036364417X694935.

## Polygonaceae

BURKE, JANELLE M.; SANCHEZ, ADRIANA (2011):

**Revised Subfamily Classification for Polygonaceae, with a tribal Classification for Eriogonoideae.**

In: Brittonia 63 (4), p. 510–520. DOI: 10.1007/s12228-011-9197-x.

BURKE, JANELLE M.; SANCHEZ, ADRIANA; KRON, KATHLEEN A.; LUCKOW, MELISSA (2010):

**Placing the woody tropical Genera of Polygonaceae: A Hypothesis of Character Evolution and Phylogeny.**

In: American Journal of Botany 97 (8), p. 1377–1390. DOI: 10.3732/ajb.1000022.

FAN, DENG-MEI; CHEN, JIA-HUI; MENG, YING; WEN, JUN; HUANG, JIN-LING; YANG, YONG-PING (2013):

**Molecular Phylogeny of *Koenigia* L. (Polygonaceae: Persicarieae): Implications for Classification, Character Evolution and Biogeography.**

In: Molecular Phylogenetics and Evolution 69 (3), p. 1093–1100. DOI: 10.1016/j.ympev.2013.08.018.

GALASSO, GABRIELE; BANFI, ENRICO; MATTIA, FABRIZIO DE; GRASSI, FABRIZIO; SGORBATI, SERGIO; LABRA, MASSIMO (2009):

**Molecular Phylogeny of *Polygonum* L. s.l. (Polygonaceae), focusing on European taxa: preliminary Results and systematic Considerations based on rbcL plastidial Sequence Data.**

In: Atti della Società Italiana di Scienze Naturali e del Museo Civico di Storia Naturale di Milano 150 (1), p. 113–148.

**KEMPTON, ELIZABETH A. (2012):**

**Systematics of Eriogonoideae s. s. (Polygonaceae).**

In: Systematic Botany 37 (3), p. 723–737. DOI: 10.1600/036364412X648698.

**KIM, SANG-TAE; DONOGHUE, MICHAEL J. (2008):**

**Incongruence between cpDNA and nrITS Trees indicates extensive Hybridization within *Eupersicaria* (Polygonaceae).**

In: American Journal of Botany 95 (9), p. 1122–1135. DOI: 10.3732/ajb.0700008.

**KIM, SANG-TAE; DONOGHUE, MICHAEL J. (2008):**

**Molecular Phylogeny of *Persicaria* (Persicarieae, Polygonaceae).**

In: Systematic Botany 33 (1), p. 77–86. DOI: 10.1600/036364408783887302.

**LI, FEN-LONG; ZELLER, FRIEDRICH J.; HUANG, KAI-FENG; SHI, TAO-XIONG; CHEN, QING-FU (2013):**

**Improvement of fluorescent Chromosome in situ PCR and its application in the Phylogeny of the Genus *Fagopyrum* Mill. using nuclear Genes of Chloroplast Origin (cpDNA).**

In: Plant Systematics and Evolution 299 (9), p. 1679–1691. DOI: 10.1007/s00606-013-0825-7.

**OHSAKO, TAKANORI; OHNISHI, OHMI (2000):**

**Intra- and interspecific Phylogeny of wild *Fagopyrum* (Polygonaceae) Species based on nucleotide Sequences of noncoding Regions in Chloroplast DNA.**

In: American Journal of Botany 87 (4), p. 573–582. DOI: 10.2307/2656601.

**SANCHEZ, ADRIANA; KRON, KATHLEEN A. (2008):**

**Phylogenetics of Polygonaceae with an Emphasis on the Evolution of Eriogonoideae.**

In: Systematic Botany 33 (1), p. 87–96. DOI: 10.1600/036364408783887456.

**SANCHEZ, ADRIANA; KRON, KATHLEEN A. (2009):**

**Phylogenetic Relationships of *Afrobrunnichia* Hutch. & Dalziel (Polygonaceae) based on three Chloroplast Genes and ITS.**

In: Taxon 58 (3), p. 781–792.

**SANCHEZ, ADRIANA; KRON, KATHLEEN A. (2011):**

**Phylogenetic Relationships of *Triplaris* and *Ruprechtia*: Re-Delimitation of the recognized Genera and two new Genera for Tribe Triplarideae (Polygonaceae).**

In: Systematic Botany 36 (3), p. 702–710. DOI: 10.1600/036364411X583664.

**SANCHEZ, ADRIANA; SCHUSTER, TANJA M.; BURKE, JANELLE M.; KRON, KATHLEEN A. (2011):**

**Taxonomy of Polygonaceae: A new tribal Classification.**

In: Taxon 60 (1), p. 151–160.

**SANCHEZ, ADRIANA; SCHUSTER, TANJA M.; KRON, KATHLEEN A. (2009):**

**A Large-Scale Phylogeny of Polygonaceae based on molecular Data.**

In: International Journal of Plant Sciences 170 (8), p. 1044–1055. DOI: 10.1086/605121.

**SCHUSTER, TANJA M.; REVEAL, JAMES L.; BAYLY, MICHAEL J.; KRON, KATHLEEN A. (2015):**

**An updated molecular Phylogeny of Polygonaceae: Relationships of *Oxygonum*, *Pteroxygonum* and *Rumex*, and a new Circumscription of *Koenigia*.**

In: Taxon 64 (6), p. 1188–1208. DOI: 10.12705/646.5.

SCHUSTER, TANJA M.; REVEAL, JAMES L.; KRON, KATHLEEN A. (2011):

**Phylogeny of Polygoneae (Polygonaceae: Polygonoideae).**

In: Taxon 60 (6), p. 1653–1666.

SCHUSTER, TANJA M.; WILSON, KAREN L.; KRON, KATHLEEN A. (2011):

**Phylogenetic Relationships of *Muehlenbeckia*, *Fallopia*, and *Reynoutria* (Polygonaceae) Investigated with Chloroplast and Nuclear Sequence Data.**

In: International Journal of Plant Sciences 172 (8), p. 1053–1066. DOI: 10.1086/661293.

SUN, WEI; ZHONG-ZE; MING-ZHEN, ZHOU; HE-WEN, LIU; DONG, WAN XIANG (2008):

**Reappraisal of the generic Status of *Pteroxygonum* (Polygonaceae) on the Basis of Morphology, Anatomy and nrDNA ITS Sequence Analysis.**

In: Journal of Systematics and Evolution 46 (1), p. 73–79.

SUN, YONGSHUAI; WANG, AILAN; WAN, DONGSHI; WANG, QIAN; LIU, JIAN-QUAN (2012):

**Rapid Radiation of *Rheum* (Polygonaceae) and parallel Evolution of morphological Traits.**

In: Molecular Phylogenetics and Evolution 63 (1), p. 150–158. DOI: 10.1016/j.ympev.2012.01.002.

TAVAKKOLI, SOLMAZ; KAZEMPOUR-OSALOO, SHAHROKH; MOZAFFARIAN, VALIOLLAH; MAASSOUMI, ALI AASGHAR (2015):

**Molecular Phylogeny of *Atraphaxis* and the woody *Polygonum* Species (Polygonaceae): Taxonomic Implications based on molecular and morphological Evidence.**

In: Plant Systematics and Evolution 301 (4), p. 1157–1170. DOI: 10.1007/s00606-014-1140-7.

TAVAKKOLI, SOLMAZ; OSALOO, SHAHROKH KAZEMPOUR; MAASSOUMI, ALI AASGHAR (2010):

**The Phylogeny of *Calligonum* and *Pteropyrum* (Polygonaceae) based on nuclear ribosomal DNA ITS and Chloroplast trnL-F Sequences.**

In: Iranian Journal of Biotechnology 8 (1), p. 7–15.

TIAN, XINMIN; LUO, JIAN; WANG, AILAN; MAO, KANG-SHAN; LIU, JIAN-QUAN (2011):

**On the Origin of the woody buckwheat *Fagopyrum tibeticum* (= *Parapteropyrum tibeticum*) in the Qinghai-Tibetan Plateau.**

In: Molecular Phylogenetics and Evolution 61 (2), p. 515–520. DOI: 10.1016/j.ympev.2011.07.001.

VYSOCHINA, G. (2014):

**Phenolic compounds in Systematics and Phylogeny of the Family Polygonaceae Juss. Vi. Genus *Knorringia* (Chukav.) Tzvel.**

In: Turczaninowia 17 (1), p. 33–41. DOI: 10.14258/turczaninowia.17.1.4.

WANG, AILAN; YANG, MEIHUA; LIU, JIAN-QUAN (2005):

**Molecular Phylogeny, recent Radiation and Evolution of gross Morphology of the rhubarb Genus *Rheum* (Polygonaceae) inferred from Chloroplast DNA trnL-F Sequences.**

In: Annals of Botany 96 (3), p. 489–498. DOI: 10.1093/aob/mci201.

ZHOU, MEI-LIANG; WANG, CHENG-LONG; WANG, DE-ZHOU; ZHENG, YA-DI; LI, FA-LIANG; ZHU, XUE-MEI ET AL. (2014):

**Phylogenetic Relationship of four new Species related to southwestern Sichuan *Fagopyrum* based on morphological and molecular Characterization.**

In: Biochemical Systematics and Ecology 57, p. 403–409. DOI: 10.1016/j.bse.2014.09.024.

## Polypodiaceae

- BAURET, LUCIE; GAUDEUL, MYRIAM; SUNDUE, MICHAEL A.; PARRIS, BARBARA S.; RANKER, TOM A.; RAKOTONDRAINIBE, FRANCE ET AL. (2017):**  
**Madagascar sheds new light on the molecular Systematics and Biogeography of Grammitid Ferns: new unexpected Lineages and numerous long-distance Dispersal Events.**  
 In: *Molecular Phylogenetics and Evolution* 111, p. 1–17. DOI: 10.1016/j.ympev.2017.03.005.
- BROWNSEY, PATRICK J.; PERRIE, LEON R. (DECEMBER 2014):**  
**Polypodiaceae (excluding *Notogrammitis*).**  
 In: Breitwieser I., Heenan P., Wilton A. (eds) *Flora of New Zealand – Seed Plants. Fascicle 1. Manaaki Whenua Press, Lincoln. With contribution of Landcare Research NZ Ltd.*
- FLS, HARALD SCHNEIDER; KREIER, HANS-PETER; HOVENKAMP, PETER H.; JANSSEN, THOMAS (2008):**  
**Phylogenetic Relationships of the Fern Genus *Christiopteris* shed new light onto the Classification and Biogeography of Drynarioid Ferns.**  
 In: *Botanical Journal of the Linnean Society* 157, p. 645–656.
- HIRAI, REGINA Y.; ROUHAN, GERMINAL; LABIAK, PAULO HENRIQUE; RANKER, TOM A.; PRADO, JEFFERSON (2011):**  
**Moranopteris: A new Neotropical Genus of Grammitid Ferns (Polypodiaceae) segregated from Asian *Micropolypodium*.**  
 In: *Taxon* 60 (4), p. 1123–1137.
- KIM, CHANGKYUN; ZHA, HONG-GUANG; DENG, TAO; SUN, HANG; WU, SU-GONG (2013):**  
**Phylogenetic Position of *Kontumia* (Polypodiaceae) inferred from four Chloroplast DNA Regions.**  
 In: *Journal of Systematics and Evolution* 51 (2), p. 154–163. DOI: 10.1111/j.1759-6831.2012.00230.x.
- KREIER, HANS-PETER; REX, MARTINA; WEISING, KURT; KESSLER, MICHAEL; SMITH, ALAN R.; SCHNEIDER, HARALD (2008):**  
**Inferring the Diversification of the epiphytic Fern Genus *Serpocaulon* (Polypodiaceae) in South America using Chloroplast Sequences and Amplified Fragment Length Polymorphisms.**  
 In: *Plant Systematics and Evolution* 274 (1-2), p. 1–16. DOI: 10.1007/s00606-008-0021-3.
- KREIER, HANS-PETER; SCHNEIDER, HARALD (2006):**  
**Phylogeny and Biogeography of the Staghorn Fern Genus *Platycerium* (Polypodiaceae, Polypodiidae).**  
 In: *American Journal of Botany* 93 (2), p. 217–225.
- KREIER, HANS-PETER; SCHNEIDER, HARALD (2006):**  
**Reinstatement of *Loxogramme dictyopteris*, based on phylogenetic Evidence, for the New Zealand endemic Fern, *Anarthropteris lanceolata* (Polypodiaceae, Polypodiidae).**  
 In: *Australian Systematic Botany* 19 (4), p. 309–314. DOI: 10.1071/SB05033.
- KREIER, HANS-PETER; ZHANG, XIAN-CHUN; MUTH, HEIKO; SCHNEIDER, HARALD (2008):**  
**The Microsoroid Ferns: Inferring the Relationships of a highly diverse Lineage of Paleotropical epiphytic Ferns (Polypodiaceae, Polypodiopsida).**  
 In: *Molecular Phylogenetics and Evolution* 48 (3), p. 1155–1167. DOI: 10.1016/j.ympev.2008.05.001.
- LABIAK, PAULO HENRIQUE; ROUHAN, GERMINAL; SUNDUE, MICHAEL A. (2010):**  
**Phylogeny and Taxonomy of *Leucotrichum* (Polypodiaceae): A new Genus of Grammitid Ferns from the Neotropics.**  
 In: *Taxon* 59 (3), p. 911–921.

- LABIAK, PAULO HENRIQUE; SUNDUE, MICHAEL A.; ROUHAN, GERMINAL (2010):**  
**Molecular Phylogeny, Character Evolution, and Biogeography of the Grammitid Fern Genus *Lellingeria* (Polypodiaceae).**  
In: American Journal of Botany 97 (8), p. 1354–1364. DOI: 10.3732/ajb.0900393.
- LEHNERT, MARCUS; KESSLER, MICHAEL; SCHMIDT-LEBUHN, ALEXANDER N.; KLIMAS, SUSAN A.; FEHLBERG, SHANNON D.; RANKER, TOM A. (2009):**  
**Phylogeny of the Fern Genus *Melpomene* (Polypodiaceae) inferred from Morphology and Chloroplast DNA Analysis.**  
In: Systematic Botany 34 (1), p. 17–27. DOI: 10.1600/036364409787602276.
- LINDSAY, STUART; MIDDLETON, DAVID J. (2009):**  
**New Combinations in the Ferns of Thailand.**  
In: Edinburgh Journal of Botany 66 (2), p. 355–361. DOI: 10.1017/S096042860900568X.
- OTTO, ELISABETH M.; JANSSEN, THOMAS; KREIER, HANS-PETER; SCHNEIDER, HARALD (2009):**  
**New Insights into the Phylogeny of *Pleopeltis* and related Neotropical Genera (Polypodiaceae, Polypodiopsida).**  
In: Molecular Phylogenetics and Evolution 53 (1), p. 190–201. DOI: 10.1016/j.ympev.2009.05.001.
- PERRIE, LEON R.; PARRIS, BARBARA P. (2012):**  
**Chloroplast DNA Sequences indicate the Grammitid Ferns (Polypodiaceae) in New Zealand belong to a single Clade, *Notogrammitis* gen. nov.**  
In: New Zealand Journal of Botany 50 (4), p. 457–472. DOI: 10.1080/0028825X.2012.735247.
- RANKER, TOM A.; GEIGER, JENNIFER M.O.; KENNEDY, S.C.; SMITH, ALAN R.; HAUFLE, CHRISTOPHER H.; PARRIS, BARBARA P. (2003):**  
**Molecular Phylogenetics and Evolution of the endemic Hawaiian Genus *Adenophorus* (Grammitidaceae).**  
In: Molecular Phylogenetics and Evolution 26 (3), p. 337–347. DOI: 10.1016/S1055-7903(02)00234-8.
- RANKER, TOM A.; SMITH, ALAN R.; PARRIS, BARBARA S.; GEIGER, JENNIFER M.O.; HAUFLE, CHRISTOPHER H.; STRAUB, SHANNON C. K.; SCHNEIDER, HARALD (2004):**  
**Phylogeny and Evolution of Grammitid Ferns (Grammitidaceae): a case of rampant morphological Homoplasy.**  
In: Taxon 53 (2), p. 415–428.
- SALINO, ALEXANDRE; ALMEIDA, THÁIS ELIAS; SMITH, ALAN R.; GÓMEZ, ADRIANNA NAVARRO; KREIER, HANS-PETER; SCHNEIDER, HARALD (2008):**  
**A new Species of *Microgramma* (Polypodiaceae) from Brazil and Recircumscription of the Genus based on phylogenetic Evidence.**  
In: Systematic Botany 33 (4), p. 630–635. DOI: 10.1600/036364408786500208.
- SCHNEIDER, HARALD; JANSSEN, THOMAS; HOVENKAMP, PETER H.; SMITH, ALAN R.; CRANFILL, RAYMOND B.; HAUFLE, CHRISTOPHER H.; RANKER, TOM A. (2004):**  
**Phylogenetic Relationships of the Enigmatic Malesian Fern *Thylacopteris* (Polypodiaceae, Polypodiidae).**  
In: International Journal of Plant Sciences 165 (6), p. 1077–1087.
- SCHNEIDER, HARALD; KREIER, HANS-PETER; PERRIE, LEON R.; BROWNSEY, PATRICK J. (2006):**  
**The Relationships of *Microsorium* (Polypodiaceae) Species occurring in New Zealand.**  
In: New Zealand Journal of Botany 44 (2), p. 121–127. DOI: 10.1080/0028825X.2006.9513012.
- SCHNEIDER, HARALD; KREIER, HANS-PETER; WILSON, ROSEMARY; SMITH, ALAN R. (2006):**



**The *Synammia* Enigma: Evidence for a Temperate Lineage of Polygrammoid Ferns (Polypodiaceae, Polypodiidae) in Southern South America.**

In: Systematic Botany 31 (1), p. 31–41.

SCHNEIDER, HARALD; SMITH, ALAN R.; CRANFILL, RAYMOND B.; HILDEBRAND, TERRI J.; HAUFLER, CHRISTOPHER H.; RANKER, TOM A. (2004):

**Unraveling the Phylogeny of Polygrammoid Ferns (Polypodiaceae and Grammitidaceae): exploring Aspects of the Diversification of epiphytic Plants.**

In: Molecular Phylogenetics and Evolution 31 (3), p. 1041–1063. DOI: 10.1016/j.ympev.2003.09.018.

SHAO, WEN; LU, SHU-GANG (2011):

***Himalayopteris*, a new Fern Genus from India and the adjacent Himalayas (Polypodiaceae, Polypodioideae).**

In: Novon: A Journal for Botanical Nomenclature 21 (1), p. 90–93. DOI: 10.3417/2009115.

SMITH, ALAN R.; KREIER, HANS-PETER; HAUFLER, CHRISTOPHER H.; RANKER, TOM A.; SCHNEIDER, HARALD (2006):

***Serpocaulon* (Polypodiaceae), a new Genus segregated from *Polypodium*.**

In: Taxon 55 (4), p. 919–930.

SPRUNT, SUSAN V.; SCHNEIDER, HARALD; WATSON, LINDA E.; RUSSELL, STEPHEN J.; NAVARRO-GOMEZ, ADRIANA; JAMES HICKEY, R. (2011):

**Exploring the molecular Phylogeny and Biogeography of *Pleopeltis polypodioides* (Polypodiaceae, Polypodiales) inferred from Plastid DNA Sequences.**

In: Systematic Botany 36 (4), p. 862–869. DOI: 10.1600/036364411X604886.

SUNDUE, MICHAEL A. (2010):

**A morphological Cladistic Analysis of *Terpsichore* (Polypodiaceae).**

In: Systematic Botany 35 (4), p. 716–729. DOI: 10.1600/036364410X539808.

SUNDUE, MICHAEL A.; ISLAM, MELISSA BAUER; RANKER, TOM A. (2010):

**Systematics of Grammitid Ferns (Polypodiaceae): using Morphology and Plastid Sequence Data to resolve the Circumscriptions of *Melpomene* and the Polyphyletic Genera *Lellingeria* and *Terpsichore*.**

In: Systematic Botany 35 (4), p. 701–715. DOI: 10.1600/036364410X539790.

SUNDUE, MICHAEL A.; PARRIS, BARBARA S.; RANKER, TOM A.; SMITH, ALAN R.; FUJIMOTO, ERIN L.; ZAMORA-CROSBY, DELIA ET AL. (2014):

**Global Phylogeny and Biogeography of Grammitid Ferns (Polypodiaceae).**

In: Molecular Phylogenetics and Evolution 81, p. 195–206. DOI: 10.1016/j.ympev.2014.08.017.

TESTO, WESTON; SUNDUE, MICHAEL A. (2014):

**Primary Hemiepiphytism in *Colysis ampla* (Polypodiaceae) provides new Insight into the Evolution of Growth Habit in Ferns.**

In: International Journal of Plant Sciences 175 (5), p. 526–536. DOI: 10.1086/675934.

WANG, FA-GUO; BARRATT, P. A.M.; WILFREDO, FALCÓN; FAY, MICHAEL F.; LEHTONEN, SAMULI; TUOMISTO, HANNA ET AL. (2014):

**On the Monophyly of Subfamily Tectarioideae (Polypodiaceae) and the phylogenetic Placement of some associated Fern Genera.**

In: Phytotaxa 164 (1), p. 1. DOI: 10.11646/phytotaxa.164.1.1.

WANG, LI; QI, XIN-PING; XIANG, QIAO-PING; HEINRICHS, JOCHEN; SCHNEIDER, HARALD; ZHANG, XIAN-CHUN (2010):

**Phylogeny of the paleotropical Fern Genus *Lepisorus* (Polypodiaceae, Polypodiopsida) inferred from four Chloroplast DNA Regions.**

In: Molecular Phylogenetics and Evolution 54 (1), p. 211–225. DOI: 10.1016/j.ympev.2009.08.032.

WANG, LI; WU, ZHI-QIANG; XIANG, QIAO-PING; HEINRICHS, JOCHEN; FLS, HARALD SCHNEIDER; ZHANG, XIAN-CHUN (2010):

**A molecular Phylogeny and a revised Classification of Tribe Lepisoreae (Polypodiaceae) based on an Analysis of four Plastid DNA Regions.**

In: Botanical Journal of the Linnean Society 162, p. 28–38.

XIAO-DONG; SHU-GANG, DONG; LI, LU CHUN-XIANG (2008):

**Molecular Phylogeny of *Colysis* (Polypodiaceae) based on Chloroplast *rbcl* and *rps4-trnS* Sequences.**

In: Journal of Systematics and Evolution 46 (5), p. 658–666.

ZHOU, XIN-MAO; ZHANG, LIANG; CHEN, CHENG-WEI; LI, CHUN-XIANG; HUANG, YAO-MOAN; CHEN, DE-KUI ET AL. (2017):

**A Plastid Phylogeny and Character Evolution of the Old World Fern Genus *Pyrrrosia* (Polypodiaceae) with the Description of a new Genus: *Hovenkampia* (Polypodiaceae).**

In: Molecular Phylogenetics and Evolution 114, p. 271–294. DOI: 10.1016/j.ympev.2017.06.020.

## Polypodiales

ROTHFELS, CARL J.; SUNDUE, MICHAEL A.; KUO, LI-YAUNG; LARSSON, ANDERS; KATO, MASAHIRO; SCHUETTPELZ, ERIC; PRYER, KATHLEEN M. (2012):

**A revised Family-level Classification for Eupolypod II Ferns (Polypodiidae: Polypodiales).**

In: Taxon 61 (3), p. 515–533.

## Pontederiaceae

NESS, ROB W.; GRAHAM, SEAN W.; BARRETT, SPENCER C. H. (2011):

**Reconciling Gene and Genome duplication events: using multiple nuclear Gene Families to infer the Phylogeny of the aquatic Plant Family Pontederiaceae.**

In: Molecular Biology and Evolution 28 (11), p. 3009–3018. DOI: 10.1093/molbev/msr119.

OLIVEIRA PELLEGRINI, MARCO OCTÁVIO (2017):

**Two new Synonyms in *Heteranthera* (Pontederiaceae, Commelinales).**

In: Nordic Journal of Botany 35 (1), p. 124–128. DOI: 10.1111/njb.01152.

## Portulacaceae

APPLEQUIST, WENDY L.; WALLACE, ROBERT P. (2001):

**Phylogeny of the Portulacaceous Cohort based on *ndhF* Sequence Data.**

In: Systematic Botany 26 (2), p. 406–419.

HERSHKOVITZ, MARK A.; ZIMMER, ELIZABETH A. (2000):

**Ribosomal DNA Evidence and Disjunctions of western American Portulacaceae.**

In: Molecular Phylogenetics and Evolution 15 (3), p. 419–439. DOI: 10.1006/mpev.1999.0720.

OCAMPO, GILBERTO (2015):

**Systematic Implications of Seed morphological Diversity in Portulacaceae (Caryophyllales).**

In: Plant Systematics and Evolution 301 (4), p. 1215–1226. DOI: 10.1007/s00606-014-1146-1.

OCAMPO, GILBERTO; COLUMBUS, TRAVIS J. (2012):

**Molecular Phylogenetics, historical Biogeography, and Chromosome Number Evolution of *Portulaca* (Portulacaceae).**

In: Molecular Phylogenetics and Evolution 63 (1), p. 97–112. DOI: 10.1016/j.ympev.2011.12.017.

## Posidoniaceae

AIRES, T.; MARBÀ, N.; CUNHA, R. L.; KENDRICK, G. A.; DI WALKER; SERRÃO, E. A. ET AL. (2011):

### **Evolutionary History of the seagrass Genus *Posidonia*.**

In: Marine Ecology Progress Series 421, p. 117–130. DOI: 10.3354/meps08879.

## Potamogetonaceae

ITO, YU; TANAKA, NORIO; GARCÍA-MURILLO, PABLO; MUASYA, A. MUTHAMA (2016):

### **A new Delimitation of the Afro-Eurasian plant Genus *Althenia* to include its Australasian relative, *Lepilaena* (Potamogetonaceae) - Evidence from DNA and morphological Data.**

In: Molecular Phylogenetics and Evolution 98, p. 261–270. DOI: 10.1016/j.ympev.2016.02.008.

LINDQVIST, CHARLOTTE; LAET, JAN; HAYNES, ROBERT R.; AAGESEN, LONE; KEENER, BRIAN R.; ALBERT, VICTOR A. (2006):

### **Molecular Phylogenetics of an aquatic plant Lineage, Potamogetonaceae.**

In: Cladistics 22 (6), p. 568–588. DOI: 10.1111/j.1096-0031.2006.00124.x.

WANG, Q. D.; ZHANG, TIANZHEN; WANG, J. B. (2007):

### **Phylogenetic Relationships and hybrid Origin of *Potamogeton* Species (Potamogetonaceae) distributed in China: Insights from the nuclear ribosomal Internal Transcribed Spacer Sequence (ITS).**

In: Plant Systematics and Evolution 267 (1-4), p. 65–78. DOI: 10.1007/s00606-006-0499-5.

## Primulaceae

BELLINO, ALESSANDRO; BELLINO, LEONARDO; BALDANTONI, DANIELA; SARACINO, ANTONIO (2015):

### **Evolution, Ecology and Systematics of *Soldanella* (Primulaceae) in the southern Apennines (Italy).**

In: BMC Evolutionary Biology 15, p. 158. DOI: 10.1186/s12862-015-0433-y.

BOUCHER, FLORIAN C.; CASAZZA, GABRIELE; SZÖVÉNYI, P.; CONTI, ELENA (2016):

### **Sequence capture using RAD probes clarifies phylogenetic Relationships and Species boundaries in *Primula* Sect. *Auricula*.**

In: Molecular Phylogenetics and Evolution 104, p. 60–72. DOI: 10.1016/j.ympev.2016.08.003.

BOUCHER, FLORIAN C.; THUILLER, WILFRIED; ROQUET, CRISTINA; DOUZET, ROLLAND; AUBERT, SERGE; ALVAREZ, NADIR; LAVERGNE, SÉBASTIEN (2012):

### **Reconstructing the Origins of high-alpine Niches and Cushion Life form in the Genus *Androsace* s.l. (Primulaceae).**

In: Evolution 66 (4), p. 1255–1268. DOI: 10.1111/j.1558-5646.2011.01483.x.

GUGGISBERG, ALESSIA; MANSION, GUILHEM; CONTI, ELENA (2009):

### **Disentangling reticulate Evolution in an Arctic-alpine polyploid Complex.**

In: Systematic Biology 58 (1), p. 55–73. DOI: 10.1093/sysbio/syp010.

GÜLTEPE, MUTLU; UZUNER, UĞUR; COŞKUNÇELEBI, KAMIL; BELDÜZ, ALI OSMAN; TERZİOĞLU, SALIH (2010):

### **Internal transcribed spacer (ITS) Polymorphism in the wild *Primula* (Primulaceae) Taxa of Turkey.**

In: Turkish Journal of Botany 34, p. 147–157.

KELSO, SYLVIA; BEARDSLEY, PAUL M.; WEITEMIER, KEVIN (2009):

### **Phylogeny and Biogeography of *Primula* Sect. *Parryi* (Primulaceae).**

In: International Journal of Plant Sciences 170 (1), p. 93–106. DOI: 10.1086/593041.

KOVTONYUK, N. K.; GONCHAROV, A. A. (2009):

- Phylogenetic Relationships in the Genus *Primula* L. (Primulaceae) inferred from the ITS Region Sequences of nuclear rDNA.**  
In: Russian Journal of Genetics 45 (6), p. 663–670. DOI: 10.1134/S1022795409060052.
- LIU, YUN-JIAO; LIU, JUAN; HU, CHI-MING; HAO, GANG (2015):**  
**Non-Monophyly of *Primula* subgenera *Auganthus* and *Carolinella* (Primulaceae) as confirmed by the nuclear DNA Sequence Variation.**  
In: Plant Systematics and Evolution 301 (8), p. 2057–2071. DOI: 10.1007/s00606-015-1207-0.
- MAST, AUSTIN R.; FELLER, DANIELLE M.S.; KELSO, SYLVIA; CONTI, ELENA (2004):**  
**Buzz-pollinated *Dodecatheon* originated from within the heterostylous *Primula* Subgenus *Auriculastrum* (Primulaceae): A Seven-region CpDNA Phylogeny and ITS Implications for Floral Evolution.**  
In: American Journal of Botany 91 (6), p. 926–942.
- MAST, AUSTIN R.; KELSO, SYLVIA; JOHN RICHARDS, A.; LANG, DANIELA J.; FELLER, DANIELLE M.S.; CONTI, ELENA (2001):**  
**Phylogenetic Relationships in *Primula* L. and related Genera (Primulaceae) based on Noncoding Chloroplast DNA.**  
In: International Journal of Plant Sciences 162 (6), p. 1381–1400.
- MAST, AUSTIN R.; REVEAL, JAMES L. (2007):**  
**Transfer of *Dodecatheon* to *Primula* (Primulaceae).**  
In: Brittonia 59 (1), p. 7982. DOI: 10.1663/0007-196X(2007)59[79:TODTPP]2.0.CO;2.
- REN, GUANGPENG; CONTI, ELENA; SALAMIN, NICOLAS (2015):**  
**Phylogeny and Biogeography of *Primula* Sect. *Armerina*: Implications for plant Evolution under climate Change and the Uplift of the Qinghai-Tibet Plateau.**  
In: BMC Evolutionary Biology 15, p. 161. DOI: 10.1186/s12862-015-0445-7.
- SCHMIDT-LEBUHN, ALEXANDER N.; VOS, JURRIAN M. DE; KELLER, BARBARA; CONTI, ELENA (2012):**  
**Phylogenetic Analysis of *Primula* Section *Primula* reveals rampant Non-Monophyly among morphologically distinct Species.**  
In: Molecular Phylogenetics and Evolution 65 (1), p. 23–34. DOI: 10.1016/j.ympev.2012.05.015.
- SCHNEWEISS, GERALD M.; SCHÖNSWETTER, PETER; KELSO, SYLVIA; NIKLFELD, HARALD (2004):**  
**Complex biogeographic Patterns in *Androsace* (Primulaceae) and related Genera: Evidence from phylogenetic Analyses of nuclear Internal Transcribed Spacer and Plastid trnL-F Sequences.**  
In: Systematic Biology 53 (6), p. 856–876. DOI: 10.1080/10635150490522566.
- TRIFT, IDA; LIDÉN, MAGNUS; ANDERBERG, ARNE A. (2004):**  
**Phylogeny and Biogeography of *Dionysia* (Primulaceae).**  
In: International Journal of Plant Sciences 165 (5), p. 845–860.
- ZHANG, LI-BING; COMES, HANS PETER; KADEREIT, JOACHIM W. (2001):**  
**Phylogeny and quaternary History of the European montane/alpine endemic *Soldanella* (Primulaceae) based on ITS and AFLP Variation.**  
In: American Journal of Botany 88 (12), p. 2331–2345. DOI: 10.2307/3558393.
- ZHANG, LI-BING; COMES, HANS PETER; KADEREIT, JOACHIM W. (2004):**  
**The temporal Course of Quaternary Diversification in the European High Mountain Endemic *Primula* Sect. *Auricula* (Primulaceae).**  
In: International Journal of Plant Sciences 165 (1), p. 191–207.
- ZHANG, LI-BING; KADEREIT, JOACHIM W. (2004):**

**Classification of *Primula Sect. Auricula* (Primulaceae) based on two molecular Data sets (ITS, AFLPs), Morphology and geographical Distribution.**

In: Botanical Journal of the Linnean Society 146 (1), p. 1–26. DOI: 10.1111/j.1095-8339.2004.00301.x.

**ZHANG, LI-BING; KADEREIT, JOACHIM W. (2004):**

**Nomenclature of *Soldanella* L. (Primulaceae).**

In: Taxon 53 (3), p. 741–752. DOI: 10.2307/4135448.

## **Proteaceae**

**BARKER, NIGEL P.; VANDERPOORTEN, ALAIN; MORTON, CYNTHIA M.; ROURKE, JOHN P. (2004):**

**Phylogeny, Biogeography, and the Evolution of Life-history Traits in *Leucadendron* (Proteaceae).**

In: Molecular Phylogenetics and Evolution 33 (3), p. 845–860. DOI: 10.1016/j.ympev.2004.07.007.

**BUTCHER, RYONEN; THIELE, KEVIN R. (2014):**

**An Investigation of Taxon Boundaries in rare and range-restricted *Synaphea* (Proteaceae: Conosperminae) Species from South-west Western Australia.**

In: Australian Systematic Botany 27 (2), p. 119–144. DOI: 10.1071/SB14015.

**CARDILLO, MARCEL; PRATT, RENAE (2013):**

**Evolution of a Hotspot Genus: geographic Variation in Speciation and extinction rates in *Banksia* (Proteaceae).**

In: BMC Evolutionary Biology 13, p. 155. DOI: 10.1186/1471-2148-13-155.

**DUCHENE, DAVID; BROMHAM, LINDELL (2013):**

**Rates of molecular Evolution and Diversification in plants: Chloroplast Substitution Rates correlate with Species-richness in the Proteaceae.**

In: BMC Evolutionary Biology 13, p. 65. DOI: 10.1186/1471-2148-13-65.

**HOLMES, GARETH D.; DOWNING, TRISHA L.; JAMES, ELIZABETH A.; BLACKET, MARK J.; HOFFMANN, ARY A.; BAYLY, MICHAEL J. (2014):**

**Phylogeny of the holly Grevilleas (Proteaceae) based on nuclear ribosomal and Chloroplast DNA.**

In: Australian Systematic Botany 27 (1), p. 56–77. DOI: 10.1071/SB13045.

**MAST, AUSTIN R.; GIVNISH, THOMAS J. (2002):**

**Historical Biogeography and the Origin of stomatal Distributions in *Banksia* and *Dryandra* (Proteaceae) based on their CpDNA Phylogeny.**

In: American Journal of Botany 89 (8), p. 1311–1323.

**MAST, AUSTIN R.; JONES, ERIC H.; HAVERY, SHAWN P. (2005):**

**An assessment of old and new DNA Sequence Evidence for the Paraphyly of *Banksia* with respect to *Dryandra* (Proteaceae).**

In: Australian Systematic Botany 18 (1), p. 75–88. DOI: 10.1071/SB04015.

**MAST, AUSTIN R.; MILTON, ETHAN F.; JONES, ERIC H.; BARKER, ROBYN M.; BARKER, WILLIAM R.; WESTON, PETER H. (2012):**

**Time-calibrated Phylogeny of the woody Australian Genus *Hakea* (Proteaceae) supports multiple Origins of insect-Pollination among bird-pollinated Ancestors.**

In: American Journal of Botany 99 (3), p. 472–487. DOI: 10.3732/ajb.1100420.

**MAST, AUSTIN R.; OLDE, PETER M.; MAKINSON, ROBERT O.; JONES, ERIC H.; KUBES, AMANDA; MILLER, ELIOT T.; WESTON, PETER H. (2015):**

**Paraphyly changes Understanding of Timing and Tempo of Diversification in Subtribe Hakeinae (Proteaceae), a giant Australian plant Radiation.**

In: American Journal of Botany 102 (10), p. 1634–1646. DOI: 10.3732/ajb.1500195.

**MAST, AUSTIN R.; THIELE, KEVIN R. (2007):**

**The transfer of *Dryandra* R.Br. to *Banksia* L.f. (Proteaceae).**

In: Australian Systematic Botany 20 (1), p. 63–71. DOI: 10.1071/SB06016.

**MAST, AUSTIN R.; WILLIS, CRYSTAL L.; JONES, ERIC H.; DOWNS, KATHERINE M.; WESTON, PETER H. (2008):**

**A smaller *Macadamia* from a more vagile Tribe: Inference of phylogenetic Relationships, Divergence times, and diaspora Evolution in *Macadamia* and relatives (tribe Macadamieae; Proteaceae).**

In: American Journal of Botany 95 (7), p. 843–870. DOI: 10.3732/ajb.0700006.

**MILNER, MELITA L.; MCINTOSH, EMMA J.; CRISP, MICHAEL D.; WESTON, PETER H.; ROSSETTO, MAURIZIO (2013):**

**Microsatellite Variation for phylogenetic, phylogeographic and population-genetic studies in *Lomatia* (Proteaceae).**

In: Australian Systematic Botany 26 (3), p. 186–195. DOI: 10.1071/SB13002.

**NASH, CHLOE M. (2017):**

**Digest: Shifting biomes: Insight into Patterns of plant Radiation and Dispersal.**

In: Evolution 71 (8), p. 2130–2131. DOI: 10.1111/evo.13300.

**PHARMAWATI, M.; YAN, G.; MCFARLANE, I. J. (2004):**

**Application of Rapd and ISSR Markers to analyse molecular Relationships in *Grevillea* (Proteaceae).**

In: Australian Systematic Botany 17 (1), p. 49–61. DOI: 10.1071/SB03016.

**REYES, ELISABETH; MORLON, HÉLÈNE; SAUQUET, HERVÉ (2015):**

**Presence in Mediterranean Hotspots and Floral Symmetry affect Speciation and Extinction Rates in Proteaceae.**

In: the new Phytologist 207 (2), p. 401–410. DOI: 10.1111/nph.13244.

**SAUQUET, HERVÉ; WESTON, PETER H.; BARKER, NIGEL P.; ANDERSON, CAJSA LISA; CANTRILL, DAVID J.; SAVOLAINEN, VINCENT (2009):**

**Using fossils and molecular Data to reveal the Origins of the Cape Proteas (Subfamily Proteoideae).**

In: Molecular Phylogenetics and Evolution 51 (1), p. 31–43. DOI: 10.1016/j.ympev.2008.12.013.

**TONNABEL, JEANNE; MIGNOT, AGNÈS; DOUZERY, EMMANUEL J. P.; REBELO, ANTHONY G.; SCHURR, FRANK M.; MIDGLEY, JEREMY J. ET AL. (2014):**

**Convergent and correlated Evolution of major Life-history Traits in the Angiosperm Genus *Leucadendron* (Proteaceae).**

In: Evolution 68 (10), p. 2775–2792. DOI: 10.1111/evo.12480.

**TONNABEL, JEANNE; OLIVIERI, ISABELLE; MIGNOT, AGNÈS; REBELO, ANTHONY G.; JUSTY, FABIENNE; SANTONI, SYLVAIN ET AL. (2014):**

**Developing nuclear DNA phylogenetic Markers in the Angiosperm Genus *Leucadendron* (Proteaceae): a Next-generation Sequencing transcriptomic Approach.**

In: Molecular Phylogenetics and Evolution 70, p. 37–46. DOI: 10.1016/j.ympev.2013.07.027.

**WELSFORD, MEGAN R.; HOBBAHN, NINA; MIDGLEY, JEREMY J.; JOHNSON, STEVEN D. (2016):**

**Floral trait Evolution associated with shifts between Insect and Wind Pollination in the dioecious Genus *Leucadendron* (Proteaceae).**

In: *Evolution* 70 (1), p. 126–139. DOI: 10.1111/evo.12821.

**WESTON, PETER H.; KOOYMAN, ROBERT M. (2002):**

**Systematics of *Eidothea* (Proteaceae), with the Description of a new Species, *E. hardeniana*, from the Nightcap Range, north-eastern New South Wales.**

In: *Telopea* 9 (4), p. 821–832.

## **Pteridaceae**

**BOUMA, WHITNEY L. M.; RITCHIE, PETER A.; PERRIE, LEON R. (2010):**

**Phylogeny and generic Taxonomy of the New Zealand Pteridaceae Ferns from Chloroplast *rbcl* DNA Sequences.**

In: *Australian Systematic Botany* 23 (3), p. 143–151. DOI: 10.1071/SB09047.

**CHAO, YI-SHAN; ROUHAN, GERMING; AMOROSO, VICTOR B.; CHIOU, WEN-LIANG (2014):**

**Molecular Phylogeny and Biogeography of the Fern Genus *Pteris* (Pteridaceae).**

In: *Annals of Botany* 114 (1), p. 109–124. DOI: 10.1093/aob/mcu086.

**COCHRAN, ALYSSA T.; PRADO, JEFFERSON; SCHUETTPELZ, ERIC (2014):**

**Tryonia, a new Taenitidoid Fern Genus segregated from *Jamesonia* and *Eriosorus* (Pteridaceae).**

In: *PhytoKeys* (35), p. 23–43. DOI: 10.3897/phytokeys.35.6886.

**EISERHARDT, WOLF L.; ROHWER, JENS GUNTER; RUSSELL, STEPHEN J.; YESILYURT, JOVITA C.; SCHNEIDER, HARALD (2011):**

**Evidence for Radiations of Cheilanthoid Ferns in the Greater Cape Floristic Region.**

In: *Taxon* 60 (5), p. 1269–1283.

**GRUSZ, AMANDA L.; WINDHAM, MICHAEL D.; PRYER, KATHLEEN M. (2009):**

**Deciphering the Origins of apomictic Polyploids in the *Cheilantes yavapensis* complex (Pteridaceae).**

In: *American Journal of Botany* 96 (9), p. 1636–1645. DOI: 10.3732/ajb.0900019.

**HIRAI, REGINA Y.; SCHUETTPELZ, ERIC; HUIET, LAYNE; PRYER, KATHLEEN M.; SMITH, ALAN R.; PRADO, JEFFERSON (2016):**

**Phylogeny and Relationships of the Neotropical *Adiantum raddianum* Group (Pteridaceae).**

In: *Taxon* 65 (6), p. 1225–1235. DOI: 10.12705/656.1.

**KIRKPATRICK, RUTH E. B. (2007):**

**Investigating the Monophyly of *Pellaea* (Pteridaceae) in the Context of a phylogenetic Analysis of Cheilanthoid Ferns.**

In: *Systematic Botany* 32 (3), p. 504–518.

**LI, FAY-WEI; PRYER, KATHLEEN M.; WINDHAM, MICHAEL D. (2012):**

***Gaga*, a new Fern Genus Segregated from *Cheilantes* (Pteridaceae).**

In: *Systematic Botany* 37 (4), p. 845–860. DOI: 10.1600/036364412X656626.

**LU, JIN-MEI; WEN, JUN; LUTZ, SUE; WANG, YI-PING; LI, DE-ZHU (2012):**

**Phylogenetic Relationships of Chinese *Adiantum* based on five Plastid Markers.**

In: *Journal of Plant Research* 125 (2), p. 237–249. DOI: 10.1007/s10265-011-0441-y.

**METZGAR, JORDAN S.; ALVERSON, EDWARD R.; CHEN, SINIAN; VAGANOV, ALEXEY V.; ICKERT-BOND, STEFANIE M. (2013):**

**Diversification and reticulation in the circumboreal Fern Genus *Cryptogramma*.**

In: *Molecular Phylogenetics and Evolution* 67 (3), p. 589–599. DOI: 10.1016/j.ympev.2013.02.020.

- NAKAZATO, TAKUYA; GASTONY, GERALD J. (2003):  
**Molecular Phylogenetics of *Anogramma* Species and related Genera (Pteridaceae: Taenitidoideae).**  
In: Systematic Botany 28 (3), p. 490–502.
- PABÓN-MORA, NATALIA; GONZÁLEZ, FAVIO (2016):  
***Nephtopteris* out of the Clouds: molecular Evidence places the enigmatic *N. maxonii* (Pteridaceae) within the *Jamesonia* Clade.**  
In: Brittonia 68 (1), p. 83–92. DOI: 10.1007/s12228-015-9394-0.
- PONCE, MONICA; SCATAGLINI, MARIA AMALIA (2016):  
**Do two South American Species of *Cheilanthes* (Pteridaceae) traditionally linked to the *Cheilanthes marginata* Group, belong to *Gaga*?**  
In: Phytotaxa 257 (2), p. 149. DOI: 10.11646/phytotaxa.257.2.4.
- PRADO, JEFFERSON; RODRIGUES, CRISTIANE DEL NERO; SALATINO, ANTONIO; SALATINO, MARIA LUIZA FARIA (2007):  
**Phylogenetic Relationships among Pteridaceae, including Brazilian species, inferred from *rbcl* Sequences.**  
In: Taxon 56 (2), p. 355–368.
- PRYER, KATHLEEN M.; HUIET, LAYNE; LI, FAY-WEI; ROTHFELS, CARL J.; SCHUETTPELZ, ERIC (2016):  
**Maidenhair Ferns, *Adiantum*, are indeed monophyletic and Sister to Shoestring Ferns, Vittarioids (Pteridaceae).**  
In: Systematic Botany 41 (1), p. 17–23. DOI: 10.1600/036364416X690660.
- ROTHFELS, CARL J.; SCHUETTPELZ, ERIC (2014):  
**Accelerated rate of molecular Evolution for Vittarioid Ferns is strong and not driven by Selection.**  
In: Systematic Biology 63 (1), p. 31–54. DOI: 10.1093/sysbio/syt058.
- ROTHFELS, CARL J.; WINDHAM, MICHAEL D.; GRUSZ, AMANDA L.; GASTONY, GERALD J.; PRYER, KATHLEEN M. (2008):  
**Toward a monophyletic *Notholaena* (Pteridaceae): resolving Patterns of evolutionary Convergence in xeric-adapted Ferns.**  
In: Taxon 57 (3), p. 712–724.
- RUHFEL, BRADLEY R.; LINDSAY, STUART; DAVIS, CHARLES C. (2008):  
**Phylogenetic Placement of *Rheopteris* and the Polyphyly of *Monogramma* (Pteridaceae s.l.): Evidence from *rbcl* Sequence Data.**  
In: Systematic Botany 33 (1), p. 37–43. DOI: 10.1600/036364408783887410.
- SÁNCHEZ-BARACALDO, PATRICIA (2004):  
**Phylogenetic Relationships of the Subfamily Taenitidoideae, Pteridaceae.**  
In: American Fern Journal 94 (3), p. 126–142. DOI: 10.1640/0002-8444(2004)094[0126:PROTST]2.0.CO;2.
- SÁNCHEZ-BARACALDO, PATRICIA (2004):  
**Phylogenetics and Biogeography of the Neotropical Fern Genera *Jamesonia* and *Eriosorus* (Pteridaceae).**  
In: American Journal of Botany 91 (2), p. 274–284.
- SCATAGLINI, MARIA AMALIA; AMALIA, M. (2012):  
**Nuevas Combinaciones en *Adiantopsis* (Pteridaceae, Cheilantheae) de América del Sur.**  
In: Novon: A Journal for Botanical Nomenclature 22 (1), p. 62–66. DOI: 10.3417/2010059.
- SCHNEIDER, HARALD; HE, LI-JUAN; HENNEQUIN, SABINE; ZHANG, XIAN-CHUN (2013):



**Towards a natural Classification of Pteridaceae: inferring the Relationships of enigmatic Pteridoid Fern Species occurring in the Sino-Himalaya and Afro-Madagascar.**

In: Phytotaxa 77 (4). DOI: 10.11646/phytotaxa.77.4.1.

**SCHUETTELPELZ, ERIC; CHEN, CHENG-WEI; KESSLER, MICHAEL; PINSON, JERALD B.; JOHNSON, GABRIEL; DAVILA, ALEX ET AL. (2016):**

**A revised generic Classification of Vittarioid Ferns (Pteridaceae) based on molecular, micromorphological, and geographic Data.**

In: Taxon 65 (4), p. 708–722. DOI: 10.12705/654.2.

**SCHUETTELPELZ, ERIC; PRYER, KATHLEEN M.; WINDHAM, MICHAEL D. (2015):**

**A unified Approach to taxonomic Delimitation in the Fern Genus *Pentagramma* (Pteridaceae).**

In: Systematic Botany 40 (3), p. 629–644. DOI: 10.1600/036364415X689366.

**SCHUETTELPELZ, ERIC; SCHNEIDER, HARALD; HUIET, LAYNE; WINDHAM, MICHAEL D.; PRYER, KATHLEEN M. (2007):**

**A molecular Phylogeny of the Fern Family Pteridaceae: assessing overall Relationships and the Affinities of previously unsampled Genera.**

In: Molecular Phylogenetics and Evolution 44 (3), p. 1172–1185. DOI: 10.1016/j.ympev.2007.04.011.

**SIGEL, ERIN M.; WINDHAM, MICHAEL D.; HUIET, LAYNE; YATSKIEVYCH, GEORGE; PRYER, KATHLEEN M. (2011):**

**Species Relationships and Farina Evolution in the Cheilanthoid Fern Genus *Argyrochosma* (Pteridaceae).**

In: Systematic Botany 36 (3), p. 554–564. DOI: 10.1600/036364411X583547.

**WANG, W. A.N.; YANG, WENLI; MAO, XINGXING; ZHAO, RANRAN; DOU, PING; ZHANG, GANGMIN (2015):**

**The phylogenetic affinities of *Pellaea connectens*, a rare endemic Chinese Fern.**

In: Phytotaxa 220 (1), p. 30. DOI: 10.11646/phytotaxa.220.1.2.

**YESILYURT, JOVITA C.; SCHNEIDER, HARALD (2010):**

**The new Fern Genus *Calciphlopteris* (Pteridaceae).**

In: Phytotaxa 7, p. 52–59.

**YESILYURT, JOVITA CISLINSKI; BARBARÁ, THELMA; SCHNEIDER, HARALD; RUSSELL, STEPHEN J.; CULHAM, ALASTAIR; GIBBY, MARY (2015):**

**Identifying the generic Limits of the Cheilanthoid Genus *Doryopteris*.**

In: Phytotaxa 221 (2), p. 101. DOI: 10.11646/phytotaxa.221.2.1.

**ZHANG, GANGMIN; ZHANG, XIAN-CHUN; CHEN, ZHI-DUAN; LIU, HONG-MEI; YANG, WENLI (2007):**

**First Insights in the Phylogeny of Asian Cheilanthoid Ferns based on Sequences of two Chloroplast Markers.**

In: Taxon 56 (2), p. 369–378.

**ZHANG, LIANG; ROTHFELS, CARL J.; EBHARA, ATSUSHI; SCHUETTELPELZ, ERIC; LE PÉCHON, TIMOTHÉE; KAMAU, PERIS ET AL. (2015):**

**A global Plastid Phylogeny of the Brake Fern Genus *Pteris* (Pteridaceae) and related Genera in the Pteridoideae.**

In: Cladistics 31 (4), p. 406–423. DOI: 10.1111/cla.12094.

**ZHANG, LIANG; ZHANG, LI-BING (2018):**

**Phylogeny and Systematics of the brake Fern Genus *Pteris* (Pteridaceae) based on molecular (plastid and nuclear) and morphological Evidence.**

In: Molecular Phylogenetics and Evolution 118, p. 265–285. DOI: 10.1016/j.ympev.2017.09.011.

ZHANG, LIANG; ZHOU, XIN-MAO; LU, NGAN THI; ZHANG, LI-BING (2017):

**Phylogeny of the Fern Subfamily Pteridoideae (Pteridaceae; Pteridophyta), with the Description of a new Genus: *Gastoniella*.**

In: Molecular Phylogenetics and Evolution 109, p. 59–72. DOI: 10.1016/j.ympev.2016.12.037.

## **Pteridophyta**

CHRISTENHUSZ, MAARTEN J.M.; ZHANG, XIAN-CHUN; SCHNEIDER, HARALD (2011):

**A linear Sequence of extant families and Genera of Lycophytes and Ferns.**

In: Phytotaxa 19, p. 7–54.

EBIHARA, ATSUSHI (2011):

**RbcL Phylogeny of Japanese Pteridophyte Flora and Implications on Intrafamilial Systematics.**

In: Bulletin of the National Museum of Nature and Science, Tokyo, Series Botany 37 (2), p. 63–74.

KNIE, NILS; FISCHER, SIMON; GREWE, FELIX; POLSAKIEWICZ, MONIKA; KNOOP, VOLKER (2015):

**Horsetails are the sister Group to all other Monilophytes and Marattiales are sister to Leptosporangiate Ferns.**

In: Molecular Phylogenetics and Evolution 90, p. 140–149. DOI: 10.1016/j.ympev.2015.05.008.

KUO, LI-YAUNG; LI, FAY-WEI; CHIOU, WEN-LIANG; WANG, CHUN-NENG (2011):

**First Insights into Fern matK Phylogeny.**

In: Molecular Phylogenetics and Evolution 59 (3), p. 556–566. DOI: 10.1016/j.ympev.2011.03.010.

LEHTONEN, SAMULI (2011):

**Towards resolving the complete Fern Tree of Life.**

In: Public Library of Science One 6 (10), e24851. DOI: 10.1371/journal.pone.0024851.

LU, JIN-MEI; ZHANG, NING; DU, XIN-YU; WEN, JUN; LI, DE-ZHU (2015):

**Chloroplast phylogenomics resolves Key Relationships in Ferns.**

In: Journal of Systematics and Evolution 53 (5), p. 448–457. DOI: 10.1111/jse.12180.

PRYER, KATHLEEN M.; SCHUETTEL, ERIC; WOLF, PAUL G.; SCHNEIDER, HARALD; SMITH, ALAN R.; CRANFILL, RAYMOND B. (2004):

**Phylogeny and Evolution of Ferns (Monilophytes) with a Focus on the early Leptosporangiate Divergences.**

In: American Journal of Botany 91 (10), p. 1582–1598.

RAI, HARDEEP S.; GRAHAM, SEAN W. (2010):

**Utility of a large, multigene Plastid Data set in inferring higher-order Relationships in Ferns and relatives (Monilophytes).**

In: American Journal of Botany 97 (9), p. 1444–1456. DOI: 10.3732/ajb.0900305.

ROTHFELS, CARL J.; LARSSON, ANDERS; KUO, LI-YAUNG; KORALL, PETRA; CHIOU, WEN-LIANG; PRYER, KATHLEEN M. (2012):

**Overcoming deep Roots, fast Rates, and short Internodes to resolve the ancient rapid Radiation of Eupolypod II Ferns.**

In: Systematic Biology 61 (3), p. 490–509. DOI: 10.1093/sysbio/sys001.

ROTHFELS, CARL J.; LI, FAY-WEI; SIGEL, ERIN M.; HUIET, LAYNE; LARSSON, ANDERS; BURGE, DYLAN O. ET AL. (2015):

**The evolutionary History of Ferns inferred from 25 low-copy nuclear Genes.**

In: American Journal of Botany 102 (7), p. 1089–1107. DOI: 10.3732/ajb.1500089.

SCHUETTEL, ERIC; PRYER, KATHLEEN M. (2007):

**Fern Phylogeny inferred from 400 Leptosporangiate Species and three Plastid Genes.**

In: *Taxon* 56 (4), p. 1037–1050.

**TANAKA, TAKAYUKI; ISAKA, YUICHI; HATTORI, MITSURU; SATO, TOSHIYUKI (2014):**

**Ecological and phylogenetic Approaches for Diversification of apogamous Ferns in Japan.**

In: *Plant Systematics and Evolution* 300 (9), p. 2041–2050. DOI: 10.1007/s00606-014-1036-6.

**TESTO, WESTON; SUNDUE, MICHAEL A. (2016):**

**A 4000-species Dataset provides new Insight into the Evolution of Ferns.**

In: *Molecular Phylogenetics and Evolution* 105, p. 200–211. DOI: 10.1016/j.ympev.2016.09.003.

**XIANCHUN, ZHANG; RAN, WEI; HONGMEI, LIU; LIJUAN, HE; LI, WANG; GANGMIN, ZHANG (2013):**

**Phylogeny and Classification of the extant Lycophytes and Ferns from China.**

In: *Chinese Bulletin of Botany* 48 (2), p. 119–137. DOI: 10.3724/SP.J.1259.2013.00119.

## Quiinaceae

**SCHNEIDER, JULIO VALENTIN; SWENSON, ULF; SAMUEL, L.; STUESSY, TOD F.; ZIZKA, GEORG (2006):**

**Phylogenetics of Quiinaceae (Malpighiales): Evidence from trnL-trnF Sequence Data and Morphology.**

In: *Plant Systematics and Evolution* 257 (3-4), p. 189–203. DOI: 10.1007/s00606-005-0386-5.

## Quillajaceae

**LUEBERT, FEDERICO (2013):**

**Taxonomy and Distribution of the Genus *Quillaja* Molina (Quillajaceae).**

In: *Feddes Repertorium* 124 (4), p. 157–162. DOI: 10.1002/fedr.201400029.

## Rafflesiaceae

**BENDIKSBY, MIKA; SCHUMACHER, TROND; GUSSAROVA, GALINA; NAIS, JAMILI; MAT-SALLEH, KAMARUDIN; SOFIYANTI, NERY ET AL. (2010):**

**Elucidating the evolutionary History of the Southeast Asian, holoparasitic, giant-flowered Rafflesiaceae: pliocene vicariance, morphological convergence and Character Displacement.**

In: *Molecular Phylogenetics and Evolution* 57 (2), p. 620–633. DOI: 10.1016/j.ympev.2010.08.005.

**NICKRENT, DANIEL LEE; BLARER, ALBERT; QIU, YIN-LONG; VIDAL-RUSSELL, ROMINA; ANDERSON, FRANK E. (2004):**

**Phylogenetic Inference in Rafflesiales: the Influence of Rate Heterogeneity and horizontal Gene Transfer.**

In: *BMC Evolutionary Biology* 4, p. 40. DOI: 10.1186/1471-2148-4-40.

## Ranunculaceae

**BALTISBERGER, MATTHIAS; HÖRANDL, ELVIRA (2016):**

**Karyotype Evolution supports the molecular Phylogeny in the Genus *Ranunculus* (Ranunculaceae).**

In: *Perspectives in Plant Ecology, Evolution and Systematics* 18, p. 1–14. DOI: 10.1016/j.ppees.2015.11.001.

**BASTIDA, JESÚS M.; ALCÁNTARA, JULIO M.; REY, PEDRO J.; VARGAS, PABLO; HERRERA, CARLOS M. (2010):**

**Extended Phylogeny of *Aquilegia*: the biogeographical and ecological Patterns of two simultaneous but contrasting Radiations.**

In: *Plant Systematics and Evolution* 284 (3-4), p. 171–185. DOI: 10.1007/s00606-009-0243-z.

**BITTKAU, CHRISTIANE; COMES, HANS PETER (2009):**

**Molecular Inference of a late Pleistocene Diversification Shift in *Nigella* s. lat. (Ranunculaceae) resulting from increased Speciation in the Aegean Archipelago.**

In: *Journal of Biogeography* 36 (7), p. 1346–1360. DOI: 10.1111/j.1365-2699.2008.02003.x.

- CHARTIER, MARION; DRESSLER, STEFAN; SCHÖNENBERGER, JÜRGEN; MORA, ALFONSO ROJAS; SARTHOU, CORINNE; WANG, WEI; JABBOUR, FLORIAN (2016):  
**The Evolution of afro-montane *Delphinium* (Ranunculaceae): Morphospecies, Phylogenetics and Biogeography.**  
In: *Taxon* 65 (6), p. 1313–1327. DOI: 10.12705/656.6.
- CHENG, JIN; XIE, LEI (2014):  
**Molecular Phylogeny and historical Biogeography of *Caltha* (Ranunculaceae) based on Analyses of multiple nuclear and Plastid Sequences.**  
In: *Journal of Systematics and Evolution* 52 (1), p. 51–67. DOI: 10.1111/jse.12051.
- CIRES, EDUARDO; BALTISBERGER, MATTHIAS; CUESTA, CANDELA; VARGAS, PABLO; PRIETO, JOSÉ ANTONIO FERNÁNDEZ (2014):  
**Allopolyploid Origin of the Balkan endemic *Ranunculus wettsteinii* (Ranunculaceae) inferred from nuclear and Plastid DNA Sequences.**  
In: *Organisms Diversity and Evolution* 14 (1), p. 1–10. DOI: 10.1007/s13127-013-0150-6.
- COMPTON, J. A.; CULHAM, ALASTAIR; GIBBINGS, J. G.; JURY, P. L. (1998):  
**Phylogeny of *Actaea* including *Cimicifuga* (Ranunculaceae) inferred from nrDNA ITS Sequence Variation.**  
In: *Biochemical Systematics and Ecology* 26, p. 185–197.
- COSSARD, GUILLAUME; SANNIER, JULIE; SAUQUET, HERVÉ; DAMERVAL, CATHERINE; CRAENE, LOUIS RONSE; JABBOUR, FLORIAN; NADOT, SOPHIE (2016):  
**Subfamilial and tribal Relationships of Ranunculaceae: Evidence from eight molecular Markers.**  
In: *Plant Systematics and Evolution* 302 (4), p. 419–431. DOI: 10.1007/s00606-015-1270-6.
- EHRENDORFER, FRIEDRICH; ZIMAN, SVETLANA N.; KÖNIG, CHRISTIANE; KEENER, CARL S.; DUTTON, BRYAN E.; TSARENKO, OLGA N. ET AL. (2009):  
**Taxonomic Revision, Phylogenetics and transcontinental Distribution of *Anemone* Section *Anemone* (Ranunculaceae).**  
In: *Botanical Journal of the Linnean Society* 160, p. 312–354.
- EMADZADE, KHATERE; GEHRKE, BERIT; LINDER, HANS PETER; HÖRANDL, ELVIRA (2011):  
**The biogeographical History of the cosmopolitan Genus *Ranunculus* L. (Ranunculaceae) in the temperate to meridional Zones.**  
In: *Molecular Phylogenetics and Evolution* 58 (1), p. 4–21. DOI: 10.1016/j.ympev.2010.11.002.
- EMADZADE, KHATERE; LEBMANN, MARKUS J.; HOFFMANN, MATTHIAS H.; TKACH, NATALIA V.; LONE, FAYAZ A.; HÖRANDL, ELVIRA (2015):  
**Phylogenetic Relationships and Evolution of high mountain Buttercups (*Ranunculus*) in North America and Central Asia.**  
In: *Perspectives in Plant Ecology, Evolution and Systematics* 17 (2), p. 131–141. DOI: 10.1016/j.ppees.2015.02.001.
- EMADZADE, KHATERE; LEHNEBACH, CARLOS A.; LOCKHART, PETER J.; HÖRANDL, ELVIRA (2010):  
**A molecular Phylogeny, Morphology and Classification of Genera of Ranunculeae (Ranunculaceae).**  
In: *Taxon* 59 (3), p. 809–828.
- HE, YANG; HOU, PEI; FAN, GANG; ARAIN, SAIMA; PENG, CHENG (2014):  
**Comprehensive Analyses of molecular Phylogeny and main Alkaloids for *Coptis* (Ranunculaceae) Species Identification.**

In: *Biochemical Systematics and Ecology* 56, p. 88–94. DOI: 10.1016/j.bse.2014.05.002.

HEISS, ANDREAS G.; KROPF, MATTHIAS; SONTAG, SUSANNE; WEBER, ANTON (2011):

**Seed Morphology of *Nigella* s.l. (Ranunculaceae): Identification, diagnostic Traits, and their potential phylogenetic Relevance.**

In: *International Journal of Plant Sciences* 172 (2), p. 267–284. DOI: 10.1086/657676.

HOFFMANN, MATTHIAS H. (1999):

**The Phylogeny of *Actaea* (Ranunculaceae): a biogeographical Approach.**

In: *Plant Systematics and Evolution* 216, p. 251–263.

HOFFMANN, MATTHIAS H.; HAGEN, K. BERNHARD VON; HÖRANDL, ELVIRA; RÖSER, MARTIN; TKACH, NATALIA V. (2010):  
**Sources of the Arctic Flora: Origins of Arctic Species in *Ranunculus* and related Genera.**

In: *International Journal of Plant Sciences* 171 (1), p. 90–106. DOI: 10.1086/647918.

HONG, YU; LUO, YAN; GAO, QI; REN, CHEN; YUAN, QIONG; YANG, QIN-ER (2017):

**Phylogeny and reclassification of *Aconitum* Subgenus *Lycotconum* (Ranunculaceae).**

In: *Public Library of Science One* 12 (1), e0171038. DOI: 10.1371/journal.pone.0171038.

HOOT, SARA B.; KRAMER, JENNY; ARROYO, MARY T.K. (2008):

**Phylogenetic Position of the South American dioecious Genus *Hamadryas* and related *Ranunculeae* (Ranunculaceae).**

In: *International Journal of Plant Sciences* 169 (3), p. 433–443. DOI: 10.1086/526460.

HÖRANDL, ELVIRA; EMADZADE, KHATERE (2011):

**The Evolution and Biogeography of alpine Species in *Ranunculus* (Ranunculaceae): A global Comparison.**

In: *Taxon* 60 (2), p. 415–426.

HÖRANDL, ELVIRA; GREILHUBER, JOHANN; KLÍMOVÁ, KATARINA; PAUN, OVIDIU; TEMSCH, EVA M.; EMADZADE, KHATERE (2009):

**Reticulate Evolution and taxonomic Concepts in the *Ranunculus auricomus* complex (Ranunculaceae): Insights from Analysis of morphological, karyological and molecular Data.**

In: *Taxon* 58 (4), p. 1194–1215.

HÖRANDL, ELVIRA; PAUN, OVIDIU; JOHANSSON, JAN THOMAS; LEHNEBACH, CARLOS A.; ARMSTRONG, TRISTAN; CHEN, LIXUE; LOCKHART, PETER J. (2005):

**Phylogenetic Relationships and evolutionary traits in *Ranunculus* s.l. (Ranunculaceae) inferred from ITS Sequence Analysis.**

In: *Molecular Phylogenetics and Evolution* 36 (2), p. 305–327. DOI: 10.1016/j.ympev.2005.02.009.

JABBOUR, FLORIAN; RENNER, SUSANNE P. (2011):

***Consolida* and *Aconitella* are an annual Clade of *Delphinium* (Ranunculaceae) that diversified in the Mediterranean basin and the Irano-Turanian Region.**

In: *Taxon* 60 (4), p. 1029–1040.

JABBOUR, FLORIAN; RENNER, SUSANNE P. (2012):

**A Phylogeny of *Delphinieae* (Ranunculaceae) shows that *Aconitum* is nested within *Delphinium* and that Late Miocene Transitions to long Life Cycles in the Himalayas and Southwest China coincide with bursts in Diversification.**

In: *Molecular Phylogenetics and Evolution* 62 (3), p. 928–942. DOI: 10.1016/j.ympev.2011.12.005.

JABBOUR, FLORIAN; RENNER, SUSANNE P. (2012):

- Spurs in a Spur: Perianth Evolution in the Delphinieae (Ranunculaceae).**  
In: International Journal of Plant Sciences 173 (9), p. 1036–1054. DOI: 10.1086/667613.
- JABBOUR, FLORIAN; RONSE DE CRAENE, LOUIS P.; NADOT, SOPHIE; DAMERVAL, CATHERINE (2009):**  
**Establishment of Zygomorphy on an ontogenic spiral and Evolution of Perianth in the Tribe Delphinieae (Ranunculaceae).**  
In: Annals of Botany 104 (5), p. 809–822. DOI: 10.1093/aob/mcp162.
- JOHANSSON, JAN THOMAS (1999):**  
**There large inversions in the Chloroplast Genomes and one loss of the Chloroplast Gene *rps16* suggest an early evolutionary Split in the Genus *Adonis* (Ranunculaceae).**  
In: Plant Systematics and Evolution 218, p. 133–143.
- LEHNEBACH, CARLOS A.; CANO, A.; MONSALVE, C.; MCLENACHAN, P.; HÖRANDL, ELVIRA; LOCKHART, PETER J. (2007):**  
**Phylogenetic Relationships of the monotypic Peruvian Genus *Laccopetalum* (Ranunculaceae).**  
In: Plant Systematics and Evolution 264 (1-2), p. 109–116. DOI: 10.1007/s00606-006-0488-8.
- LUO, JIANG-PING; HONG, YU; REN, CHEN; YANG, QIN-ER; YUAN, QIONG (2016):**  
**Reinstatement of the Chinese Species *Cimicifuga lancifoliolata* (Ranunculaceae).**  
In: Nordic Journal of Botany 34 (5), p. 627–640. DOI: 10.1111/njb.01092.
- LUO, YAN (2005):**  
**Taxonomic Revision of *Aconitum* (Ranunculaceae) from Sichuan, China.**  
In: Acta Phytotaxonomica Sinica 43 (4), p. 289–386. DOI: 10.1360/aps040102.
- LUO, YAN; ZHANG, FU-MIN; YANG, QIN-ER (2005):**  
**Phylogeny of *Aconitum* Subgenus *Aconitum* (Ranunculaceae) inferred from ITS Sequences.**  
In: Plant Systematics and Evolution 252 (1-2), p. 11–25. DOI: 10.1007/s00606-004-0257-5.
- MANNING, JOHN C.; GOLDBLATT, PETER (2013):**  
**The native and naturalised Species of *Peltocalathos* and *Ranunculus* (Ranunculaceae: Ranunculaceae) in southern Africa.**  
In: Bothalia 43 (2), p. 179–195.
- MEYER, KYLE M.; HOOT, SARA B.; ARROYO, MARY T.K. (2010):**  
**Phylogenetic Affinities of South American *Anemone* (Ranunculaceae), including the endemic segregate Genera, *Barneoudia* and *Oreithales*.**  
In: International Journal of Plant Sciences 171 (3), p. 323–331. DOI: 10.1086/650153.
- MIKEDA, OSAMU; KITA, KOICHI; HANDA, TAKASHI; TOMOHISA, YUKAWA (2006):**  
**Phylogenetic Relationships of *Clematis* (Ranunculaceae) based on Chloroplast and nuclear DNA Sequences.**  
In: Botanical Journal of the Linnean Society 152, p. 153–168.
- MLINAREC, JELENA; FRANJEVIC, DAMJAN; BOCKOR, LUKA; BESENDORFER, VIŠNJA (2016):**  
**Diverse evolutionary Pathways shaped 5s rDNA of Species of Tribe Anemoneae (Ranunculaceae) and reveal phylogenetic Signal.**  
In: Botanical Journal of the Linnean Society 182, p. 80–99.
- MLINAREC, JELENA; SATOVIĆ, ZLATKO; MIHELJ, D.; MALENICA, N.; BESENDORFER, VIŠNJA (2012):**  
**Cytogenetic and phylogenetic Studies of diploid and polyploid Members of Tribe Anemoninae (Ranunculaceae).**

In: *Plant Biology* 14 (3), p. 525–536. DOI: 10.1111/j.1438-8677.2011.00519.x.

**PAUN, OVIDIU; LEHNEBACH, CARLOS A.; JOHANSSON, JAN THOMAS; LOCKHART, PETER J.; HÖRANDL, ELVIRA (2005):  
Phylogenetic Relationships and Biogeography of *Ranunculus* and allied Genera  
(Ranunculaceae) in the Mediterranean Region and in the European Alpine System.**

In: *Taxon* 54 (4), p. 911–930.

**SCHUETTPELZ, ERIC; HOOT, SARA B. (2004):**

**Phylogeny and Biogeography of *Caltha* (Ranunculaceae) based on Chloroplast and  
nuclear DNA Sequences.**

In: *American Journal of Botany* 91 (2), p. 247–253.

**SOZA, VALERIE L.; BRUNET, JOHANNE; LISTON, AARON; SMITH, PATRICIA SALLES; DI STILIO, VERÓNICA P. (2012):  
Phylogenetic Insights into the Correlates of Dioecy in Meadow-rues (*Thalictrum*,  
Ranunculaceae).**

In: *Molecular Phylogenetics and Evolution* 63 (1), p. 180–192. DOI: 10.1016/j.ympev.2012.01.009.

**SOZA, VALERIE L.; HAWORTH, KENDALL L.; DI STILIO, VERÓNICA P. (2013):**

**Timing and Consequences of recurrent Polyploidy in Meadow-rues (*Thalictrum*,  
Ranunculaceae).**

In: *Molecular Biology and Evolution* 30 (8), p. 1940–1954. DOI: 10.1093/molbev/mst101.

**SUN, HANG; MCLEWIN, WILL; FAY, MICHAEL F. (2001):**

**Molecular Phylogeny of *Helleborus* (Ranunculaceae), with an Emphasis on the East  
Asian-Mediterranean Disjunction.**

In: *Taxon* 50 (4), p. 1001–1018.

**WANG, W.; LI, R.-Q.; CHEN, Z.-D. (2005):**

**Systematic Position of *Asteropyrum* (Ranunculaceae) inferred from Chloroplast and  
nuclear Sequences.**

In: *Plant Systematics and Evolution* 255 (1-2), p. 41–54. DOI: 10.1007/s00606-005-0339-z.

**WANG, WEI; CHEN, ZHI-DUAN (2007):**

**Generic level Phylogeny of Thalicthroideae (Ranunculaceae) as Implications for the  
taxonomic Status of *Paropyrum* and petal Evolution.**

In: *Taxon* 56 (3), p. 811–821.

**WANG, WEI; HU, HAO; XIANG, XIAO-GUO; YU, SHENG-XIANG; CHEN, ZHI-DUAN (2010):**

**Phylogenetic Placements of *Calathodes* and *Megaleranthis* (Ranunculaceae):  
Evidence from molecular and morphological Data.**

In: *Taxon* 59 (6), p. 1712–1720.

**WANG, WEI; LI, HONG-LEI; XIANG, XIAO-GUO; CHEN, ZHI-DUAN (2014):**

**Revisiting the Phylogeny of Ranunculeae: Implications for Divergence time  
Estimation and historical Biogeography.**

In: *Journal of Systematics and Evolution* 52 (5), p. 551–565. DOI: 10.1111/jse.12101.

**WANG, WEI; LIU, YANG; YU, SHENG-XIANG; GAO, TIAN-GANG; CHEN, ZHI-DUAN (2013):**

***Gymnaconitum*, a new Genus of Ranunculaceae endemic to the Qinghai-Tibetan  
Plateau.**

In: *Taxon* 62 (4), p. 713–722. DOI: 10.12705/624.10.

**WANG, WEN-TSAI (2007):**

**A Revision of *Clematis* Sect. *Tubulosae* (Ranunculaceae).**

In: *Acta Phytotaxonomica Sinica* 45 (4), p. 425–457. DOI: 10.1360/aps06114.

- XIANG, KUN-LI; ERST, ANDREY S.; XIANG, XIAO-GUO; JABBOUR, FLORIAN; WANG, WEI (2018):**  
**Biogeography of *Coptis* Salisb. (Ranunculales, Ranunculaceae, Coptidoideae), an Eastern Asian and North American Genus.**  
 In: BMC Evolutionary Biology 18 (1), p. 74. DOI: 10.1186/s12862-018-1195-0.
- XIANG, KUN-LI; WU, SHENG-DAN; YU, SHENG-XIANG; LIU, YANG; JABBOUR, FLORIAN; ERST, ANDREY P. ET AL. (2016):**  
**The First Comprehensive Phylogeny of *Coptis* (Ranunculaceae) and its Implications for Character Evolution and Classification.**  
 In: Public Library of Science One 11 (4), e0153127. DOI: 10.1371/journal.pone.0153127.
- XIANG, KUN-LI; ZHAO, LIANG; ERST, ANDREY S.; YU, SHENG-XIANG; JABBOUR, FLORIAN; WANG, WEI (2017):**  
**A molecular Phylogeny of *Dichocarpum* (Ranunculaceae): Implications for eastern Asian Biogeography.**  
 In: Molecular Phylogenetics and Evolution 107, p. 594–604. DOI: 10.1016/j.ympev.2016.12.026.
- XIE, LEI; LI, LIANG-QIAN (2012):**  
**Variation of Pollen Morphology, and its Implications in the Phylogeny of *Clematis* (Ranunculaceae).**  
 In: Plant Systematics and Evolution 298 (8), p. 1437–1453. DOI: 10.1007/s00606-012-0648-y.
- XIE, LEI; WEN, JUN; LI, LIANG-QIAN (2011):**  
**Phylogenetic Analyses of *Clematis* (Ranunculaceae) based on Sequences of Nuclear Ribosomal ITS and three Plastid Regions.**  
 In: Systematic Botany 36 (4), p. 907–921. DOI: 10.1600/036364411X604921.
- ZHANG, YU; HONG, YU; REN, CHEN; TANG, MING; HOOT, SARA B.; YANG, QIN-ER (2015):**  
**Palynology, Cytology, and molecular Systematics of *Anemone* Section *Begoniifolia* (Ranunculaceae).**  
 In: Plant Systematics and Evolution 301 (1), p. 411–424. DOI: 10.1007/s00606-014-1082-0.
- ZHANG, YU; KONG, HANG-HUI; YANG, QIN-ER (2015):**  
**Phylogenetic Relationships and taxonomic Status of the monotypic Chinese Genus *Anemoclema* (Ranunculaceae).**  
 In: Plant Systematics and Evolution 301 (5), p. 1335–1344. DOI: 10.1007/s00606-014-1160-3.

## Ranunculales

- WANG, WEI; LU, AN-MING; REN, YI; ENDRESS, MARY E.; CHEN, ZHI-DUAN (2009):**  
**Phylogeny and Classification of Ranunculales: Evidence from four molecular Loci and morphological Data.**  
 In: Perspectives in Plant Ecology, Evolution and Systematics 11 (2), p. 81–110. DOI: 10.1016/j.ppees.2009.01.001.

## Rapateaceae

- GIVNISH, THOMAS J.; EVANS, TIMOTHY M.; ZHRA, MICHELLE L.; PATTERSON, T. B.; BERRY, PAUL E.; SYTSMA, K. J. (2000):**  
**Molecular Evolution, Adaptive Radiation, and Geographic Diversification in the Amphiatlantic Family Rapateaceae: Evidence from *ndhF* Sequences and Morphology.**  
 In: Evolution 54 (6), p. 1915–1937. DOI: 10.1111/j.0014-3820.2000.tb01237.x.
- GIVNISH, THOMAS J.; MILLAM, KENDRA C.; EVANS, TIMOTHY M.; HALL, JOCELYN C.; CHRIS PIRES, J.; BERRY, PAUL E.; SYTSMA, KENNETH J. (2004):**



**Ancient Vicariance or Recent Long-Distance Dispersal? Inferences about Phylogeny and South American–African Disjunctions in Rapateaceae and Bromeliaceae based on *ndh F* Sequence Data.**

In: *International Journal of Plant Sciences* 165 (S4), S35–S54. DOI: 10.1086/421067.

ORIANI, ALINE; SCATENA, VERA LUCIA (2013):

**The taxonomic value of Floral Characters in Rapateaceae (Poales-Monocotyledons).**

In: *Plant Systematics and Evolution* 299 (2), p. 291–303. DOI: 10.1007/s00606-012-0721-6.

## Rehmanniaceae

ALBACH, DIRK C.; YAN, KUN; JENSEN, SØREN ROSENDAL; LI, HONG-QING (2009):

**Phylogenetic Placement of *Triaenophora* (formerly Scrophulariaceae) with some Implications for the Phylogeny of Lamiales.**

In: *Taxon* 58 (3), p. 749–756.

LIU, CHUN-YAN; YUAN, CHAO; LI, XUE-TONG; LI, ZHONG-HU; ZHAO, PENG; QIAN, ZENG-QIANG ET AL. (2015):

**Development of Microsatellites from *Rehmannia glutinosa* Transcriptome and Evaluation of genetic Diversity among *Rehmannia* Species.**

In: *Biochemical Systematics and Ecology* 59, p. 177–182. DOI: 10.1016/j.bse.2015.01.022.

## Resedaceae

MARTÍN-BRAVO, SANTIAGO; MEIMBERG, HARALD; LUCEÑO, MODESTO; MÄRKL, WOLFGANG; VALCÁRCEL, VIRGINIA; BRÄUCHLER, CHRISTIAN ET AL. (2007):

**Molecular Systematics and Biogeography of Resedaceae based on ITS and *trnL-F* Sequences.**

In: *Molecular Phylogenetics and Evolution* 44 (3), p. 1105–1120. DOI: 10.1016/j.ympev.2006.12.016.

## Restionaceae

BRIGGS, BARBARA G. (2012):

**Chromosome Numbers in some Australian Restionaceae (Poales): new Counts and an inferred Base Number for Leptocarpoideae.**

In: *Telopea* 14, p. 37–42. DOI: 10.7751/telopea2012006.

BRIGGS, BARBARA G. (2014):

***Desmocladus* (Restionaceae) enlarged to include the Western Australian Genera *Harperia*, *Kulinia* and *Onychosepalum*.**

In: *Telopea* 17, p. 29–33. DOI: 10.7751/telopea20147402.

BRIGGS, BARBARA G.; DIXON, K. W.; JOHNSON, LAWRENCE A.S. (2012):

**New Species and Variation in *Lepidobolus* (Restionaceae) from Western Australia.**

In: *Telopea* 14, p. 29–36. DOI: 10.7751/telopea2012005.

BRIGGS, BARBARA G.; JOHNSON, LAWRENCE A.S. (2004):

**New Combinations in *Chordifex* (Restionaceae) from eastern Australia and new Species from Western Australia.**

In: *Telopea* 10 (3), p. 683–700.

BRIGGS, BARBARA G.; JOHNSON, LAWRENCE A.S. (2014):

***Leptocarpus* (Restionaceae) enlarged to include *Meeboldina* and *Stenotalis*, with new Western Australian Species and Subgenera.**

In: *Telopea* 16, p. 19–41. DOI: 10.7751/telopea20147400.

BRIGGS, BARBARA G.; LINDER, HANS PETER (2009):

**A new subfamilial and tribal Classification of Restionaceae (Poales).**

In: *Telopea* 12 (3), p. 333–345.

**BRIGGS, BARBARA G.; MARCHANT, ADAM D.; PERKINS, ANDREW J. (2014):**

**Phylogeny of the Restiid Clade (Poales) and Implications for the Classification of Anarthriaceae, Centrolepidaceae and Australian Restionaceae.**

In: *Taxon* 63 (1), p. 24–46. DOI: 10.12705/631.1.

**ELDENÄS, PIA K.; LINDER, HANS PETER (2000):**

**Congruence and Complementarity of morphological and trnL-trnF Sequence Data and the Phylogeny of the African Restionaceae.**

In: *Systematic Botany* 25 (4), p. 692–707. DOI: 10.2307/2666728.

**HARDY, CHRISTOPHER R.; LINDER, HANS PETER (2007):**

**Phylogeny and Historical Ecology of *Rhodocoma* (Restionaceae) from the Cape Floristic Region.**

In: *Aliso* 23, p. 213–226.

**LINDER, HANS PETER; ELDENÄS, PIA K.; BRIGGS, BARBARA G. (2003):**

**Contrasting Patterns of Radiation in African and Australian Restionaceae.**

In: *Evolution* 57 (12), p. 2688–2702. DOI: 10.1554/03-097.

**LINDER, HANS PETER; HARDY, CHRISTOPHER R. (2010):**

**A generic Classification of the Restioneae (Restionaceae), southern Africa.**

In: *Bothalia* 40 (1), p. 1–35. DOI: 10.4102/abc.v40i1.178.

**LINDER, HANS PETER; HARDY, CHRISTOPHER R.; RUTSCHMANN, FRANK (2005):**

**Taxon Sampling effects in molecular Clock Dating: an Example from the African Restionaceae.**

In: *Molecular Phylogenetics and Evolution* 35 (3), p. 569–582. DOI: 10.1016/j.ympev.2004.12.006.

**LINDER, HANS PETER; MANN, D. M. (1998):**

**The Phylogeny and Biogeography of *Thamnochortus* (Restionaceae).**

In: *Botanical Journal of the Linnean Society* 128 (4), p. 319–357. DOI: 10.1111/j.1095-8339.1998.tb02125.x.

**MOLINE, PHILIP M.; LINDER, HANS PETER (2005):**

**Molecular Phylogeny and Generic Delimitation in the *Elegia* Group (Restionaceae, South Africa) based on a complete Taxon Sampling and four Chloroplast DNA Regions.**

In: *Systematic Botany* 30 (4), p. 759–772.

**MOLINE, PHILIP M.; LINDER, HANS PETER (2006):**

**Input Data, analytical Methods and Biogeography of *Elegia* (Restionaceae).**

In: *Journal of Biogeography* 33 (1), p. 47–62. DOI: 10.1111/j.1365-2699.2005.01369.x.

**WAGSTAFF, STEVEN J.; CLARKSON, BEVERLEY R. (2012):**

**Systematics and Ecology of the Australasian Genus *Empodisma* (Restionaceae) and Description of a new Species from Peatlands in northern New Zealand.**

In: *PhytoKeys* (13), p. 39–79. DOI: 10.3897/phytokeys.13.3259.

## Rhamnaceae

**AAGESEN, LONE; MEDAN, D.; KELLERMANN, JÜRGEN; HILGER, HARTMUT H. (2005):**

**Phylogeny of the Tribe Colletieae (Rhamnaceae)? A sensitivity Analysis of the Plastid Region trnL-trnF combined with Morphology.**

In: *Plant Systematics and Evolution* 250 (3-4), p. 197–214. DOI: 10.1007/s00606-004-0204-5.

**BOLMGREN, KJELL; OXELMAN, BENGT (2004):**

**Generic limits in *Rhamnus* L. s.l. (Rhamnaceae) inferred from nuclear and Chloroplast DNA Sequence Phylogenies.**

In: Taxon 53 (2), p. 383–390.

**BUERKI, SVEN; PHILLIPSON, PETER B.; CALLMANDER, MARTIN W. (2011):**

**A taxonomic Revision of *Gouania* (Rhamnaceae) in Madagascar and the other Islands of the Western Indian Ocean (the Comoro and Mascarene Islands, and the Seychelles).**

In: Annals of the Missouri Botanical Garden 98 (2), p. 157–195. DOI: 10.3417/2007075.

**BURGE, DYLAN O.; ERWIN, DIANE M.; ISLAM, MELISSA BAUER; KELLERMANN, JÜRGEN; KEMBEL, STEVEN W.; WILKEN, DIETER H.; MANOS, PAUL P. (2011):**

**Diversification of *Ceanothus* (Rhamnaceae) in the California Floristic Province.**

In: International Journal of Plant Sciences 172 (9), p. 1137–1164. DOI: 10.1086/662028.

**FAY, MICHAEL F.; LLED, MA D.; RICHARDSON, JAMES E.; RYE, BARBARA L.; HOPPER, STEPHEN D. (2001):**

**Molecular Data confirm the Affinities of the South-west Australian endemic *Granitites* with *Alphitonia* (Rhamnaceae).**

In: Kew Bulletin 56, p. 669–675.

**HARDIG, TERRY M.; SOLTIS, PAMELA S.; SOLTIS, DOUGLAS E. (2000):**

**Diversification of the North American Shrub Genus *Ceanothus* (Rhamnaceae): Conflicting Phylogenies from Nuclear Ribosomal DNA and Chloroplast DNA.**

In: American Journal of Botany 87 (1), p. 108–123.

**HAUENSCHILD, FRANK (2016):**

**Corrigendum to Hauenschild, F. & al., Analysis of the cosmopolitan Buckthorn Genera *Frangula* and *Rhamnus* s.l. supports the Description of a new Genus.**

In: Taxon 65 (4), p. 926–927. DOI: 10.12705/654.49.

**HAUENSCHILD, FRANK; FAVRE, ADRIEN; SALAZAR, GERARDO A.; MÜLLNER-RIEHL, ALEXANDRA N. (2016):**

**Analysis of the cosmopolitan Buckthorn Genera *Frangula* and *Rhamnus* s.l. supports the Description of a new Genus, *Ventia*.**

In: Taxon 65 (1), p. 65–78. DOI: 10.12705/651.5.

**HAUENSCHILD, FRANK; MATUSZAK, SABINE; MÜLLNER-RIEHL, ALEXANDRA N.; FAVRE, ADRIEN (2016):**

**Phylogenetic Relationships within the cosmopolitan Buckthorn Family (Rhamnaceae) support the Resurrection of *Sarcomphalus* and the Description of *Pseudoziziphus* gen. nov.**

In: Taxon 65 (1), p. 47–64. DOI: 10.12705/651.4.

**ISLAM, MELISSA BAUER; GURALNICK, ROBERT P. (2015):**

**Generic Placement of the Former *Condaliopsis* (Rhamnaceae) Species.**

In: Phytotaxa 236 (1), p. 25. DOI: 10.11646/phytotaxa.236.1.2.

**KELLERMANN, JÜRGEN; MEDAN, D.; AAGESEN, LONE; HILGER, HARTMUT H. (2005):**

**Rehabilitation of the South American Genus *Ochetophila* Poepp. ex Endl. (Rhamnaceae: Colletieae).**

In: New Zealand Journal of Botany 43 (4), p. 865–869. DOI: 10.1080/0028825X.2005.9512996.

**KELLERMANN, JÜRGEN; RYE, BARBARA L.; THIELE, KEVIN R. (2006):**

***Polianthion*, a new Genus of Rhamnaceae (Pomadereae) from Western Australia and Queensland.**

In: Australian Systematic Botany 19 (2), p. 169. DOI: 10.1071/SB05027.

KELLERMANN, JÜRGEN; UDOVICIC, FRANK; LADIGES, PAULINE Y. (2005):

**Phylogenetic Analysis and generic Limits of the Tribe Pomaderreae (Rhamnaceae) using Internal Transcribed Spacer DNA Sequences.**

In: *Taxon* 54 (3), p. 619–631.

ONSTEIN, RENSK E.; CARTER, RICHARD J.; XING, YAOWU; RICHARDSON, JAMES E.; LINDER, HANS PETER (2015):

**Do Mediterranean-type Ecosystems have a common History? - Insights from the Buckthorn Family (Rhamnaceae).**

In: *Evolution* 69 (3), p. 756–771. DOI: 10.1111/evo.12605.

POOL, AMY (2013):

**New Species, Combinations, and Lectotypifications in Neotropical and Northern Mexican *Frangula* (Rhamnaceae).**

In: *Novon: A Journal for Botanical Nomenclature* 22 (4), p. 447–467. DOI: 10.3417/2013009.

RICHARDSON, JAMES E.; FAY, MICHAEL F.; CRONK, QUENTIN C.B.; BOWMAN, DIANE; CHASE, MARK W. (2000):

**A phylogenetic Analysis of Rhamnaceae using Rbcl and Trnl-f Plastid DNA Sequences.**

In: *American Journal of Botany* 87 (9), p. 1309–1324.

RICHARDSON, JAMES E.; WEITZ, FRANS M.; FAY, MICHAEL F.; CRONK, QUENTIN C.B.; LINDER, HANS PETER; REEVES, GAIL; CHASE, MARK W. (2001):

**Phylogenetic Analysis of *Phyllica* L. (Rhamnaceae) with an Emphasis on Island species: Evidence from Plastid trnL-F and nuclear Internal Transcribed Spacer (ribosomal) DNA Sequences.**

In: *Taxon* 50 (2), p. 405–427.

## Rhizophoraceae

SCHWARZBACH, ANDREA E.; RICKLEFS, ROBERT E. (2000):

**Systematic affinities of Rhizophoraceae and Anisophylleaceae, and intergeneric Relationships within Rhizophoraceae, based on Chloroplast DNA, nuclear ribosomal DNA, and Morphology.**

In: *American Journal of Botany* 87 (4), p. 547–564. DOI: 10.2307/2656599.

SETOGUCHI, HIROAKI; KOSUGE, KEIKO; TOBE, HIROSHI (1999):

**Molecular Phylogeny of Rhizophoraceae based on rbcL Gene Sequences.**

In: *Journal of Plant Research* 112 (4), p. 443–455. DOI: 10.1007/PL00013899.

TSAI, CHI-CHU; LI, SHU-JU; SU, YU-YEN; YONG, JEAN W.H.; SAENGER, PETER; CHESSON, PETER ET AL. (2012):

**Molecular Phylogeny and Evidence for natural Hybridization and historical introgression between *Ceriops* Species (Rhizophoraceae).**

In: *Biochemical Systematics and Ecology* 43, p. 178–191. DOI: 10.1016/j.bse.2012.03.009.

## Rosaceae

ACOSTA, JUAN M.; SALARIATO, DIEGO LEONEL; CIALDELLA, ANA MARÍA (2016):

**Molecular Phylogeny and morphological Analysis of *Tetraglochin* (Rosaceae: Rosoideae: Sanguisorbeae) and Recognition of the new Species *T. andina*.**

In: *Systematic Botany* 41 (4), p. 839–850. DOI: 10.1600/036364416X693946.

ALICE, LAWRENCE A.; CAMPBELL, CHRISTOPHER P. (1999):

**Phylogeny of *Rubus* (Rosaceae) based on Nuclear Ribosomal DNA Internal Transcribed Spacer Region Sequences.**

In: *American Journal of Botany* 86 (1), p. 81–97.

- BORTIRI, E.; HEUVEL, B. VANDEN; POTTER, DANIEL (2006):**  
**Phylogenetic Analysis of Morphology in *Prunus* reveals extensive Homoplasy.**  
 In: *Plant Systematics and Evolution* 259 (1), p. 53–71. DOI: 10.1007/s00606-006-0427-8.
- BRUNEAU, ANNE; STARR, JULIAN R.; JOLY, SIMON (2007):**  
**Phylogenetic Relationships in the Genus *Rosa*: new Evidence from Chloroplast DNA Sequences and an appraisal of current Knowledge.**  
 In: *Systematic Botany* 32 (2), p. 366–378. DOI: 10.1600/036364407781179653.
- BURGESS, MICHAEL B.; CUSHMAN, KEVIN R.; DOUCETTE, ERIC T.; FRYE, CHRISTOPHER T.; CAMPBELL, CHRISTOPHER P. (2015):**  
**Understanding diploid Diversity: A first Step in Unraveling polyploid, apomictic Complexity in *Amelanchier*.**  
 In: *American Journal of Botany* 102 (12), p. 2041–2057. DOI: 10.3732/ajb.1500330.
- CAMPBELL, CHRISTOPHER S.; EVANS, RODGER C.; MORGAN, D. R.; DICKINSON, TIMOTHY A.; ARSENAULT, MATTHEW P. (2007):**  
**Phylogeny of Subtribe Pyrinae (formerly the Maloideae, Rosaceae): Limited Resolution of a complex evolutionary History.**  
 In: *Plant Systematics and Evolution* 266 (1-2), p. 119–145. DOI: 10.1007/s00606-007-0545-y.
- CHIN, SIEW-WAI; SHAW, JOEY; HABERLE, ROSEMARIE C.; WEN, JUN; POTTER, DANIEL (2014):**  
**Diversification of Almonds, Peaches, Plums and Cherries - molecular Systematics and biogeographic History of *Prunus* (Rosaceae).**  
 In: *Molecular Phylogenetics and Evolution* 76, p. 34–48. DOI: 10.1016/j.ympev.2014.02.024.
- CHIN, SIEW-WAI; WEN, JUN; JOHNSON, GABRIEL; POTTER, DANIEL (2010):**  
**Merging *Maddenia* with the morphologically diverse *Prunus* (Rosaceae).**  
 In: *Botanical Journal of the Linnean Society* 164, p. 236–245.
- CHUNG, KYONG-SOOK; ELISENS, WAYNE J.; SKVARLA, JOHN J. (2010):**  
**Pollen Morphology and its phylogenetic Significance in Tribe Sanguisorbeae (Rosaceae).**  
 In: *Plant Systematics and Evolution* 285 (3-4), p. 139–148. DOI: 10.1007/s00606-009-0262-9.
- DANET, FRÉDÉRIC (2016):**  
**Le genre *Argentina* Hill (Rosaceae) en Nouvelle-Guinée: une Espèce et une Combinaison nouvelles.**  
 In: *Adansonia* 38 (2), p. 233–239. DOI: 10.5252/a2016n2a7.
- DEPYPERE, LEANDER; CHAERLE, PETER; BREYNE, PETER; VANDER MIJNSBRUGGE, KRISTINE; GOETGHEBEUR, PAUL (2009):**  
**A combined morphometric and AFLP based Diversity Study challenges the Taxonomy of the European Members of the complex *Prunus* L. Section *Prunus*.**  
 In: *Plant Systematics and Evolution* 279 (1-4), p. 219–231. DOI: 10.1007/s00606-009-0158-8.
- DOBES, CHRISTOPH; PAULE, JURAJ (2010):**  
**A comprehensive Chloroplast DNA-based Phylogeny of the Genus *Potentilla* (Rosaceae): Implications for its geographic Origin, Phylogeography and generic Circumscription.**  
 In: *Molecular Phylogenetics and Evolution* 56 (1), p. 156–175. DOI: 10.1016/j.ympev.2010.03.005.
- ERIKSSON, TORSTEN; LUNDBERG, MAGNUS; TÖPEL, MATS; ÖSTENSSON, PIA; SMEDMARK, JENNY E.E. (2015):**  
***Sibbaldia*: a molecular phylogenetic Study of a remarkably polyphyletic Genus in Rosaceae.**  
 In: *Plant Systematics and Evolution* 301 (1), p. 171–184. DOI: 10.1007/s00606-014-1063-3.

- EVANS, RODGER C.; CAMPBELL, CHRISTOPHER P. (2002):  
**The Origin of the Apple Subfamily (Maloideae; Rosaceae) is clarified by DNA Sequence Data from duplicated GBSSI Genes.**  
 In: American Journal of Botany 89 (9), p. 1478–1484.
- FAGHIR, MARZIEH BEYGOM; ATTAR, FARIDEH; FARAZMAND, ALI; KAZEMPOUR-OSALOO, SHAHROKH (2014):  
**Phylogeny of the Genus *Potentilla* (Rosaceae) in Iran based on nrDNA ITS and cpDNA trnL-F Sequences with a Focus on Leaf and Style characters' Evolution.**  
 In: Turkish Journal of Botany 38, p. 417–429. DOI: 10.3906/bot-1303-67.
- FAGHIR, MARZIEH BEYGOM; ATTAR, FARIDEH; SHAVVON, ROBABEH SHAHI; MEHRMANESH, ATEFEH (2015):  
**Pollen Morphology of the Genus *Alchemilla* L. (Rosaceae) in Iran.**  
 In: Turkish Journal of Botany 39, p. 267–279. DOI: 10.3906/bot-1406-23.
- FENG, TAO; MOORE, MICHAEL J.; SUN, YANXIA; MENG, AI-PING; CHU, HAIJIA; LI, JIAN-QIANG; WANG, HENG-CHANG (2015):  
**A new Species of *Argentina* (Rosaceae, Potentilleae) from Southeast Tibet, with Reference to the taxonomic Status of the Genus.**  
 In: Plant Systematics and Evolution 301 (3), p. 911–921. DOI: 10.1007/s00606-014-1125-6.
- FENG, TAO; MOORE, MICHAEL J.; YAN, MIN-HUI; SUN, YAN-XIA; ZHANG, HUA-JIE; MENG, AI-PING ET AL. (2017):  
**Phylogenetic Study of the Tribe Potentilleae (Rosaceae), with further Insight into the disintegration of *Sibbaldia*.**  
 In: Journal of Systematics and Evolution 55 (3), p. 177–191. DOI: 10.1111/jse.12243.
- FOUGÈRE-DANEZAN, MARIE; JOLY, SIMON; BRUNEAU, ANNE; GAO, XIN-FEN; ZHANG, LI-BING (2015):  
**Phylogeny and Biogeography of wild roses with specific attention to polyploids.**  
 In: Annals of Botany 115 (2), p. 275–291. DOI: 10.1093/aob/mcu245.
- GEHRKE, BERIT; BRÄUCHLER, CHRISTIAN; ROMOLEROUX, K.; LUNDBERG, MAGNUS; HEUBL, GÜNTHER; ERIKSSON, TORSTEN (2008):  
**Molecular Phylogenetics of *Alchemilla*, *Aphanes* and *Lachemilla* (Rosaceae) inferred from Plastid and nuclear Intron and spacer DNA Sequences, with Comments on generic Classification.**  
 In: Molecular Phylogenetics and Evolution 47 (3), p. 1030–1044. DOI: 10.1016/j.ympev.2008.03.004.
- GUO, WEI; YU, YI; SHEN, RU-JIANG; LIAO, WEN-BO; CHIN, SIEW-WAI; POTTER, DANIEL (2011):  
**A Phylogeny of *Photinia* sensu lato (Rosaceae) and related Genera based on nrITS and cpDNA Analysis.**  
 In: Plant Systematics and Evolution 291 (1-2), p. 91–102. DOI: 10.1007/s00606-010-0368-0.
- JOLY, SIMON; BRUNEAU, ANNE (2006):  
**Incorporating Allelic Variation for Reconstructing the evolutionary History of Organisms from Multiple Genes: An Example from *Rosa* in North America.**  
 In: Systematic Biology 55 (4), p. 623–636. DOI: 10.1080/10635150600863109.
- JOLY, SIMON; BRUNEAU, ANNE (2007):  
**Delimiting Species Boundaries in *Rosa* Sect. *Cinnamomeae* (Rosaceae) in Eastern North America.**  
 In: Systematic Botany 32 (4), p. 819–836.
- KESSLER, MICHAEL; SCHMIDT-LEBUHN, ALEXANDER N. (2006):  
**Taxonomical and Distributional Notes on *Polylepis* (Rosaceae).**  
 In: Organisms Diversity and Evolution 6 (1), p. 67–69. DOI: 10.1016/j.ode.2005.04.001.

- KHAN, GULZAR; ZHANG, FA-QI; GAO, QING-BO; FU, PENG-CHENG; XING, RUI; WANG, JIU-LI ET AL. (2016):**  
**Phylogenetic Analyses of *Spiraea* (Rosaceae) distributed in the Qinghai-Tibetan Plateau and adjacent Regions: Insights from molecular Data.**  
In: *Plant Systematics and Evolution* 302 (1), p. 11–21. DOI: 10.1007/s00606-015-1238-6.
- KOOPMAN, WIM J. M.; WISSEMAN, VOLKER; COCK, KATRIEN; VAN HUYLENBROECK, JOHAN; RIEK, JAN DE; SABATINO, GERDA J. H. ET AL. (2008):**  
**AFLP Markers as a Tool to reconstruct complex Relationships: A Case Study in *Rosa* (Rosaceae).**  
In: *American Journal of Botany* 95 (3), p. 353–366.
- KOROTKOVA, NADJA; PAROLLY, GERALD; KHACHATRYAN, ANAHIT; GHULIKYAN, LUSINE; SARGSYAN, HARUTYUN; AKOPIAN, JANNA ET AL. (2018):**  
**Towards resolving the evolutionary History of Caucasian Pears (*Pyrus*, Rosaceae)- Phylogenetic Relationships, Divergence Times and Leaf Trait Evolution.**  
In: *Journal of Systematics and Evolution* 56 (1), p. 35–47. DOI: 10.1111/jse.12276.
- LEE, CHUNGHEE; HONG, SUK-PYO (2011):**  
**Phylogenetic Relationships of the rare Korean monotypic endemic Genus *Pentactina Nakai* in the Tribe Spiraeae (Rosaceae) based on molecular Data.**  
In: *Plant Systematics and Evolution* 294 (3-4), p. 159–166. DOI: 10.1007/s00606-011-0457-8.
- LEE, SANGTAE; HEO, KYOUNG-IN; CHO, JUHEE; LEE, CHUNGHEE; CHEN, WEN-LI; KIM, SEUNG-CHUL (2011):**  
**New Insights into Pollen Morphology and its Implications in the Phylogeny of *Sanguisorba* L. (Rosaceae; Sanguisorbeae).**  
In: *Plant Systematics and Evolution* 291 (3-4), p. 227–242. DOI: 10.1007/s00606-010-0384-0.
- LEE, WILLIAM G.; MACMILLAN, B. H.; PARTRIDGE, T. R.; LISTER, R.; LLOYD, KELVIN M. (2001):**  
**Fruit features in relation to the Ecology and Distribution of *Acaena* (Rosaceae) Species in New Zealand.**  
In: *New Zealand Journal of Ecology* 25 (1), p. 17–27.
- LI, FEIFEI; FAN, QIANG; LI, QINGYAN; CHEN, SUFANG; GUO, WEI; CUI, DAFANG; LIAO, WEN-BO (2014):**  
**Molecular Phylogeny of *Cotoneaster* (Rosaceae) inferred from nuclear ITS and multiple Chloroplast Sequences.**  
In: *Plant Systematics and Evolution* 300 (6), p. 1533–1546. DOI: 10.1007/s00606-014-0980-5.
- LI, MENG; OHI-TOMA, TETSUO; GAO, YUN-DONG; XU, BO; ZHU, ZHANG-MING; JU, WEN-BIN; GAO, XIN-FEN (2017):**  
**Molecular Phylogenetics and historical Biogeography of *Sorbus sensu stricto* (Rosaceae).**  
In: *Molecular Phylogenetics and Evolution* 111, p. 76–86. DOI: 10.1016/j.ympev.2017.03.018.
- LIU, XIAO-LIN; WEN, JUN; NIE, ZE-LONG; JOHNSON, GABRIEL; LIANG, ZONG-SUO; CHANG, ZHAO-YANG (2013):**  
**Polyphyly of the *Padus* Group of *Prunus* (Rosaceae) and the Evolution of biogeographic Disjunctions between Eastern Asia and Eastern North America.**  
In: *Journal of Plant Research* 126 (3), p. 351–361. DOI: 10.1007/s10265-012-0535-1.
- LO EUGENIA, Y.Y.; STEFANOVIĆ, SAŠA; DICKINSON, TIMOTHY A. (2007):**  
**Molecular Reappraisal of Relationships between *Crataegus* and *Mespilus* (Rosaceae, Pyreae)- Two Genera or One?**  
In: *Systematic Botany* 32 (3), p. 596–616.
- LO, EUGENIA Y.Y.; DONOGHUE, MICHAEL J. (2012):**

**Expanded phylogenetic and dating Analyses of the Apples and their Relatives (Pyreae, Rosaceae).**

In: *Molecular Phylogenetics and Evolution* 63 (2), p. 230–243. DOI: 10.1016/j.ympev.2011.10.005.

**LO, EUGENIA Y.Y.; STEFANOVIĆ, SAŠA; CHRISTENSEN, KNUD IB; DICKINSON, TIMOTHY A. (2009):**

**Evidence for genetic association between East Asian and western North American *Crataegus* L. (Rosaceae) and rapid Divergence of the eastern North American Lineages based on multiple DNA Sequences.**

In: *Molecular Phylogenetics and Evolution* 51 (2), p. 157–168. DOI: 10.1016/j.ympev.2009.01.018.

**LUNDBERG, MAGNUS; TÖPEL, MATS; ERIKSEN, BENTE; NYLANDER, JOHAN A.A.; ERIKSSON, TORSTEN (2009):**

**Allopolyploidy in *Fragariinae* (Rosaceae): comparing four DNA Sequence Regions, with comments on Classification.**

In: *Molecular Phylogenetics and Evolution* 51 (2), p. 269–280. DOI: 10.1016/j.ympev.2009.02.020.

**MARTICORENA, ALICIA (2006):**

**Revisión del Género *Acaena* (Rosaceae) en Chile.**

In: *Annals of the Missouri Botanical Garden* 93 (3), p. 412–454. DOI: 10.3417/0026-6493(2007)93[412:RDGARE]2.0.CO;2.

**NJUGUNA, WAMBUI; LISTON, AARON; CRONN, RICHARD C.; ASHMAN, TIA-LYNN; BASSIL, NAHLA (2013):**

**Insights into Phylogeny, sex Function and Age of *Fragaria* based on whole Chloroplast Genome Sequencing.**

In: *Molecular Phylogenetics and Evolution* 66 (1), p. 17–29. DOI: 10.1016/j.ympev.2012.08.026.

**OH, SANG-HUN; POTTER, DANIEL (2003):**

**Phylogenetic utility of the second Intron of Leafy in *Neillia* and *Stephanandra* (Rosaceae) and Implications for the Origin of *Stephanandra*.**

In: *Molecular Phylogenetics and Evolution* 29 (2), p. 203–215. DOI: 10.1016/S1055-7903(03)00093-9.

**OH, SANG-HUN; POTTER, DANIEL (2005):**

**Molecular phylogenetic Systematics and Biogeography of Tribe Neillieae (Rosaceae) using DNA Sequences of CpDNA, RDNA, and Leafy.**

In: *Systematic Botany* 92 (1), p. 179–192.

**OHTA, S.; YAMAMOTO, T.; NISHITANI, C.; KATSUKI, T.; IKETANI, H.; OMURA, M. (2007):**

**Phylogenetic Relationships among Japanese flowering Cherries (*Prunus* Subgenus *Cerasus*) based on nucleotide Sequences of Chloroplast DNA.**

In: *Plant Systematics and Evolution* 263 (3-4), p. 209–225. DOI: 10.1007/s00606-006-0474-1.

**POTTER, DANIEL; ERIKSSON, TORSTEN; EVANS, RODGER C.; OH, SANG-HUN; SMEDMARK, JENNY E.E.; MORGAN, D. R. ET AL. (2007):**

**Phylogeny and Classification of Rosaceae.**

In: *Plant Systematics and Evolution* 266 (1-2), p. 5–43. DOI: 10.1007/s00606-007-0539-9.

**POTTER, DANIEL; STILL, P. M.; GREBENC, T.; BALLIAN, D.; BOŽIČ, G.; FRANJIJE, J.; KRAIGHER, H. (2007):**

**Phylogenetic Relationships in Tribe Spiraeae (Rosaceae) inferred from nucleotide Sequence Data.**

In: *Plant Systematics and Evolution* 266 (1-2), p. 105–118. DOI: 10.1007/s00606-007-0544-z.

**RIEK, JAN DE; COCK, KATRIEN; SMULDERS, MARINUS J. M.; NYBOM, HILDE (2013):**

**AFLP-based population Structure Analysis as a Means to validate the complex Taxonomy of Dog-Roses (*Rosa* Section *Caninae*).**

In: *Molecular Phylogenetics and Evolution* 67 (3), p. 547–559. DOI: 10.1016/j.ympev.2013.02.024.



- ROUSSEAU-GUEUTIN, MATHIEU; GASTON, A.; AÏNOUCHE, ABDELKADER; AÏNOUCHE, MALIKA L.; OLBRICHT, K.; STAUDT, G. ET AL. (2009):  
**Tracking the evolutionary History of Polyploidy in *Fragaria* L. (Strawberry): new Insights from phylogenetic Analyses of low-copy nuclear Genes.**  
 In: *Molecular Phylogenetics and Evolution* 51 (3), p. 515–530. DOI: 10.1016/j.ympev.2008.12.024.
- SCHMIDT-LEBUHN, ALEXANDER N.; KESSLER, MICHAEL; KUMAR, MAHENDRA (2006):  
**Promiscuity in the Andes: Species Relationships in *Polylepis* (Rosaceae, Sanguisorbeae) based on AFLP and Morphology.**  
 In: *Systematic Botany* 31 (3), p. 547–559.
- SCOTT, JUN WEN; BERGGREN, T.; LEE, CHUNG-HEE; ICKERT-BOND, STEFANIE M.; YI, TING-SHUANG; YOO, KI-OUNG ET AL. (2008):  
**Phylogenetic Inferences in *Prunus* (Rosaceae) using Chloroplast *ndhF* and nuclear ribosomal ITS Sequences.**  
 In: *Journal of Systematics and Evolution* 46 (3), p. 322–332.
- SENNIKOV, ALEXANDER N.; KURTTO, ARTO (2017):  
**A phylogenetic checklist of *Sorbus* s.l. (Rosaceae) in Europe.**  
 In: *Memoranda Societatis pro Fauna et Flora Fennica* 93, p. 1–78.
- SEPP, SILVIA; BOBROVA, VERA K.; TROITSKY, ALEX K.; GLAZUNOVA, KLAVDIYA P. (2000):  
**Genetic polymorphism detected with Rapd Analysis and morphological Variability in some Microspecies of apomictic *Alchemilla*.**  
 In: *Ann Bot Fennici* 37, p. 105–123.
- SHAW, JOEY; SMALL, RANDALL L. (2005):  
**Chloroplast DNA Phylogeny and Phylogeography of the North American Plums (*Prunus* Subgenus *Prunus* Section *Prunocerasus*, Rosaceae).**  
 In: *American Journal of Botany* 92 (12), p. 2011–2030.
- SHI, SHUO; LI, JINLU; SUN, JIAHUI; YU, JING; ZHOU, SHILIANG (2013):  
**Phylogeny and Classification of *Prunus* sensu lato (Rosaceae).**  
 In: *Journal of Integrative Plant Biology* 55 (11), p. 1069–1079. DOI: 10.1111/jipb.12095.
- SMEDMARK, JENNY E.E.; ERIKSSON, TORSTEN (2002):  
**Phylogenetic Relationships of *Geum* (Rosaceae) and Relatives inferred from the nrITS and trnL-trnF Regions.**  
 In: *Systematic Botany* 27 (2), p. 303–317.
- SMEDMARK, JENNY E.E.; ERIKSSON, TORSTEN; BREMER, BIRGITTA (2005):  
**Allopolyploid Evolution in Geinae (Colurieae: Rosaceae) – building reticulate Species Trees from bifurcating Gene Trees.**  
 In: *Organisms Diversity and Evolution* 5 (4), p. 275–283. DOI: 10.1016/j.ode.2004.12.003.
- SOCHOR, MICHAL; VAŠUT, RADIM J.; SHARBEL, TIMOTHY F.; TRÁVNÍČEK, BOHUMIL (2015):  
**How just a few makes a lot: Speciation via Reticulation and Apomixis on Example of European Brambles (*Rubus* subgen. *Rubus*, Rosaceae).**  
 In: *Molecular Phylogenetics and Evolution* 89, p. 13–27. DOI: 10.1016/j.ympev.2015.04.007.
- SOJÁK, JIŘÍ (2008):  
**Notes on *Potentilla* XXI. A new division of the Tribe Potentilleae (Rosaceae) and Notes on generic Delimitations.**  
 In: *Botanische Jahrbücher für Systematik, Pflanzengeschichte und Pflanzengeographie* 127, p. 349–358.

- TÖPEL, MATS; ANTONELLI, ALEXANDRE; YESSON, CHRIS; ERIKSEN, BENTE (2012):**  
**Past climate Change and plant Evolution in Western North America: a case Study in Rosaceae.**  
In: Public Library of Science One 7 (12), e50358. DOI: 10.1371/journal.pone.0050358.
- VIEIRA, JORGE; FERREIRA, PEDRO G.; AGUIAR, BRUNO; FONSECA, NUNO A.; VIEIRA, CRISTINA P. (2010):**  
**Evolutionary Patterns at the RNase based gametophytic Self-incompatibility System in two divergent Rosaceae Groups (Maloideae and Prunus).**  
In: BMC Evolutionary Biology 10, p. 200. DOI: 10.1186/1471-2148-10-200.
- WISSEMAN, VOLKER; RITZ, CHRISTINE M. (2005):**  
**The Genus *Rosa* (Rosoideae, Rosaceae) revisited: molecular Analysis of nrITS-1 and atpB-rbc L intergenic spacer (lgs) versus conventional Taxonomy.**  
In: Botanical Journal of the Linnean Society 147, p. 275–290.
- WISSEMAN, VOLKER; RITZ, CHRISTINE M. (2007):**  
**Evolutionary Patterns and processes in the Genus *Rosa* (Rosaceae) and their Implications for host-parasite Co-Evolution.**  
In: Plant Systematics and Evolution 266 (1-2), p. 79–89. DOI: 10.1007/s00606-007-0542-1.
- XU, QIANG; WEN, XIAOPENG; DENG, XIUXIN (2007):**  
**Phylogenetic and evolutionary Analysis of NBS-encoding Genes in Rosaceae Fruit Crops.**  
In: Molecular Phylogenetics and Evolution 44 (1), p. 315–324. DOI: 10.1016/j.ympev.2006.12.029.
- YANG, JI YOUNG; PAK, JAE-HONG (2006):**  
**Phylogeny of Korean *Rubus* (Rosaceae) based on its (nrDNA) and trnL/F intergenic Region (cpDNA).**  
In: Journal of Plant Biology 49 (1), p. 44–54.
- YAZBEK, M.; OH, SANG-HUN (2013):**  
**Peaches and Almonds: Phylogeny of *Prunus* Subg. *Amygdalus* (Rosaceae) based on DNA Sequences and Morphology.**  
In: Plant Systematics and Evolution 299 (8), p. 1403–1418. DOI: 10.1007/s00606-013-0802-1.
- YI-HUA, TONG; NIAN-HEI.A., X. (2016):**  
**New Combinations for Chinese *Argentina* Hill (Rosaceae).**  
In: Journal of Tropical and Subtropical Botany 24 (4), p. 426–428.
- ZAMANI, ASGHAR; ATTAR, FARIDEH; MAROOFI, HOSEIN (2012):**  
**A Synopsis of the Genus *Pyrus* (Rosaceae) in Iran.**  
In: Nordic Journal of Botany 30, p. 310–332.
- ZHANG, ZHAOYANG; FAN, LIMING; YANG, JUNBO; HAO, XIAOJIANG; GU, ZHIJIAN (2006):**  
**Alkaloid Polymorphism and ITS Sequence Variation in the *Spiraea japonica* Complex (Rosaceae) in China: Traces of the Biological Effects of the Himalaya-Tibet Plateau Uplift.**  
In: American Journal of Botany 93 (5), p. 762–769.
- ZHENG, XIAOYAN; CAI, DANYING; POTTER, DANIEL; POSTMAN, JOSEPH; LIU, JING; TENG, YUANWEN (2014):**  
**Phylogeny and evolutionary histories of *Pyrus* L. revealed by phylogenetic Trees and networks based on Data from multiple DNA Sequences.**  
In: Molecular Phylogenetics and Evolution 80, p. 54–65. DOI: 10.1016/j.ympev.2014.07.009.
- ZHENG, XIAOYAN; HU, CHUNYUN; SPOONER, DAVID M.; LIU, JING; CAO, JIASHU; TENG, YUANWEN (2011):**

**Molecular Evolution of Adh and Leafy and the phylogenetic Utility of their Introns in *Pyrus* (Rosaceae).**

In: BMC Evolutionary Biology 11, p. 255. DOI: 10.1186/1471-2148-11-255.

**ZHU, ZHANG-MING; GAO, XIN-FEN; FOUGÈRE-DANEZAN, MARIE (2015):**

**Phylogeny of *Rosa* Sections *Chinenses* and *Synstylae* (Rosaceae) based on Chloroplast and nuclear Markers.**

In: Molecular Phylogenetics and Evolution 87, p. 50–64. DOI: 10.1016/j.ympev.2015.03.014.

## Rousseaceae

**PILLON, YOCHAN; HOPKINS, HELEN C.F.; BARRABÉ, LAURE; STACY, E. A. (2014):**

**A new record for *Carpodetus* (Rousseaceae) in Vanuatu.**

In: New Zealand Journal of Botany 52 (4), p. 449–452. DOI: 10.1080/0028825X.2014.928332.

## Rubiaceae

**ACHILLE, FRÉDÉRIC; MOTLEY, TIMOTHY J.; LOWRY, PORTER PRESCOTT; JÉRÉMIE, JOËL (2006):**

**Polyphyly in *Guettarda* L. (Rubiaceae, Guettardeae) based on nrDNA ITS Sequence Data.**

In: Annals of the Missouri Botanical Garden 93 (1), p. 103–121. DOI: 10.3417/0026-6493(2006)93[103:PIGLRG]2.0.CO;2.

**ALEJANDRO, GRECEBIO JONATHAN D.; MEVE, ULRICH; MOULY, ARNAUD; THIV, MIKE; LIEDE-SCHUMANN, SIGRID (2011):**

**Molecular Phylogeny and taxonomic Revision of the Philippine endemic *Villaria* Rolfe (Rubiaceae).**

In: Plant Systematics and Evolution 296 (1-2), p. 1–20. DOI: 10.1007/s00606-011-0472-9.

**ALEJANDRO, GRECEBIO JONATHAN D.; MEVE, ULRICH; UY, MILLARD; MOULY, ARNAUD; THIV, MIKE; LIEDE-SCHUMANN, SIGRID (2010):**

**Molecular support of the Classification of *Greeniopsis* Merr. in Aleisanthieae (Rubiaceae), with a Revision of the Genus.**

In: Taxon 59 (5), p. 1547–1564.

**ALEJANDRO, GRECEBIO JONATHAN D.; RAZAFIMANDIMBISON, SYLVAIN G.; LIEDE-SCHUMANN, SIGRID (2005):**

**Polyphyly of *Mussaenda* inferred from ITS and trnT-F Data and ITS Implication for Generic Limits in Mussaendeae (Rubiaceae).**

In: American Journal of Botany 92 (3), p. 544–557.

**ANDERSON, CAJSA LISA; ROVA, JOHAN H.E.; ANDERSSON, LENNART (2001):**

**Molecular Phylogeny of the Tribe Anthospermeae (Rubiaceae): Systematic and biogeographic Implications.**

In: Australian Systematic Botany 14 (2), p. 231–244. DOI: 10.1071/SB00021.

**ANDERSSON, LENNART (2002):**

**Relationships and Generic Circumscriptions in the *Psychotria* Complex (Rubiaceae, Psychotrieae).**

In: Systematics and Geography of Plants 72 (1-2), p. 167–202.

**ANDERSSON, LENNART; ANTONELLI, ALEXANDRE (2005):**

**Phylogeny of the Tribe Cinchoneae (Rubiaceae), its Position in Cinchonoideae, and Description of a new Genus, *Ciliosemina*.**

In: Taxon 54 (1), p. 17–28.

**ANDREASEN, KATARINA; BREMER, BIRGITTA (2000):**

**Combined phylogenetic Analysis in the Rubiaceae-Ixoroideae: Morphology, Nuclear and Chloroplast DNA Data.**

In: American Journal of Botany 87 (11), p. 1731–1748.

**BACKLUND, MARIA; BREMER, BIRGITTA; THULIN, MATS (2007):**

**Paraphyly of Paederieae, Recognition of Putorieae and Expansion of *Plocama* (Rubiaceae-Rubioideae).**

In: Taxon 56 (2), p. 315–328.

**BARRABÉ, LAURE; BUERKI, SVEN; MOULY, ARNAUD; DAVIS, AARON P.; MUNZINGER, JÉRÔME; MAGGIA, LAURENT (2012):**  
**Delimitation of the Genus *Margaritopsis* (Rubiaceae) in the Asian, Australasian and Pacific Region, based on molecular phylogenetic Inference and Morphology.**

In: Taxon 61 (6), p. 1251–1268.

**BARRABÉ, LAURE; MAGGIA, LAURENT; PILLON, YOHAN; RIGAULT, FRÉDÉRIC; MOULY, ARNAUD; DAVIS, AARON P.; BUERKI, SVEN (2014):**

**New Caledonian Lineages of *Psychotria* (Rubiaceae) reveal different evolutionary Histories and the largest documented Plant Radiation for the Archipelago.**

In: Molecular Phylogenetics and Evolution 71, p. 15–35. DOI: 10.1016/j.ympev.2013.10.020.

**BARRABÉ, LAURE; MOULY, ARNAUD; LOWRY, PORTER PRESCOTT; MUNZINGER, JÉRÔME (2011):**

**Reinstatement of the endemic New Caledonian Genus *Thiollierea* Montrouz. (Rubiaceae) necessitated by the Polyphyly of *Bikkia* Reinw. as currently circumscribed.**

In: Adansonia 33 (1), p. 115–134. DOI: 10.5252/a2011n1a8.

**BLOCK, PETRA J.; RAZAFIMANDIMBISON, SYLVAIN G.; JANSSENS, STEVEN B.; OCHOTERENA, HELGA; ROBBRECHT, ELMAR; BREMER, BIRGITTA (2015):**

**Molecular Phylogenetics and generic assessment in the Tribe Pavetteae (Rubiaceae).**

In: Taxon 64 (1), p. 79–95. DOI: 10.12705/641.19.

**BORHIDI, A.; DARÓK, J.; STRANCZINGER, SZILVIA (2011):**

***Donnellyanthus* (Rubiaceae, Rondeletieae), a new Genus in the Flora of Mexico and Meso-America.**

In: Acta Botanica Hungarica 53 (3-4), p. 273–281. DOI: 10.1556/ABot.53.2011.3–4.9.

**BORHIDI, A.; LOZADA-PÉREZ, L. (2011):**

***Martensianthus* nomen novum to replace *Neomartensia* Borhidi et Lozada-Pérez 2010 (Rubiaceae) non Yoshida et Mikami 1996 (Delesseriaceae).**

In: Acta Botanica Hungarica 53 (1-2), p. 37–42.

**BREMER, BIRGITTA (2009):**

**A Review of molecular phylogenetic Studies of Rubiaceae.**

In: Annals of the Missouri Botanical Garden 96 (1), p. 4–26. DOI: 10.3417/2006197.

**BREMER, BIRGITTA; ERIKSSON, TORSTEN (2009):**

**Time Tree of Rubiaceae: Phylogeny and Dating the Family, Subfamilies, and Tribes.**

In: International Journal of Plant Sciences 170 (6), p. 766–793. DOI: 10.1086/599077.

**CABAÑA FADER, ANDREA A.; SALAS, ROBERTO MANUEL; DESSEIN, STEVEN; CABRAL, ELSA L. (2016):**

**Synopsis of *Hexasepalum* (Rubiaceae), the Priority Name for *Diodella* and a new Species from Brazil.**

In: Systematic Botany 41 (2), p. 408–422. DOI: 10.1600/036364416X691803.

**CHURCH, SHERI A. (2003):**

- Molecular Phylogenetics of *Houstonia* (Rubiaceae): descending aneuploidy and breeding system Evolution in the Radiation of the Lineage across North America.**  
In: *Molecular Phylogenetics and Evolution* 27 (2), p. 223–238. DOI: 10.1016/S1055-7903(02)00446-3.
- CHURCH, SHERI A.; TAYLOR, DOUGLAS R. (2005):**  
**Speciation and Hybridization among *Houstonia* (Rubiaceae) Species: the Influence of Polyploidy on Reticulate Evolution.**  
In: *American Journal of Botany* 92 (8), p. 1372–1380.
- CORTÉS-B., ROCIO; DELPRETE, PIERO G.; MOTLEY, TIMOTHY J. (2009):**  
**Phylogenetic Placement of the Tribe Retiniphyllae among the Subfamily Ixoroideae (Rubiaceae).**  
In: *Annals of the Missouri Botanical Garden* 96 (1), p. 61–67. DOI: 10.3417/2006198.
- CORTÉS-B., ROCIO; MOTLEY, TIMOTHY J. (2015):**  
**Phylogeny of the Henriquezieae-Posoquerieae-Sipaneeae, a Guayanan-centered Clade of Rubiaceae: Implications for morphological Evolution.**  
In: *Phytotaxa* 206 (1), p. 90. DOI: 10.11646/phytotaxa.206.1.12.
- DAVIS, AARON P.; CHESTER, MICHAEL; MAURIN, OLIVIER (2007):**  
**Searching for the relatives of *Coffea* (Rubiaceae, Ixoroideae): the Circumscription and Phylogeny of Coffeae based on Plastid Sequence Data and Morphology.**  
In: *American Journal of Botany* 94 (3), p. 313–329.
- DELPRETE, PIERO G.; CORTÉS-B., ROCIO (2004):**  
**A phylogenetic Study of the Tribe Sipaneeae (Rubiaceae, Ixoroideae), using trnL-F and ITS Sequence Data.**  
In: *Taxon* 53 (2), p. 347–356.
- DELPRETE, PIERO G.; PERSSON, CLAES (2012):**  
***Octavia sessiliflora* DC. and *Mussaenda glomerulata* Lam. ex Poir., two obscure Taxa from French Guiana synonymous with Members of the *Alibertia* Group (Rubiaceae, Gardenieae).**  
In: *Adansonia* 34 (2), p. 353–363. DOI: 10.5252/a2012n2a9.
- DENG, YUN-FEI (2007):**  
***Fleroya*, a substitute name for *Hallea* J.-f. Leroy (Rubiaceae).**  
In: *Taxon* 56 (1), p. 247–248.
- DUAN, TINGTING; DENG, XIAOFANG; CHEN, SHI; LUO, ZHONGLAI; ZHAO, ZHONGTAO; TU, TIE-YAO ET AL. (2018):**  
**Evolution of sexual systems and growth habit in *Mussaenda* (Rubiaceae): Insights into the evolutionary pathways of Dioecy.**  
In: *Molecular Phylogenetics and Evolution* 123, p. 113–122. DOI: 10.1016/j.ympev.2018.02.015.
- GARGIULO, ROBERTA; GUACCHIO, EMANUELE DEL; CAPUTO, PAOLO (2015):**  
**Phylogenetic Reconstruction of *Asperula* Sect. *Cynanchicae* (Rubiaceae) reveals a Mosaic of evolutionary Histories.**  
In: *Taxon* 64 (4), p. 754–769. DOI: 10.12705/644.7.
- GINTER, ANNA; RAZAFIMANDIMBISON, SYLVAIN G.; BREMER, BIRGITTA (2015):**  
**Phylogenetic affinities of *Myrioneuron* and *Cyanoneuron*, generic Limits of the Tribe Argostemmatae and Description of a new Asian Tribe, *Cyanoneuroneae* (Rubiaceae).**  
In: *Taxon* 64 (2), p. 286–298. DOI: 10.12705/642.2.

- GROENINCKX, INGE; DESSEIN, STEVEN; OCHOTERENA, HELGA; PERSSON, CLAES; MOTLEY, TIMOTHY J.; KÄREHED, JESPER ET AL. (2009):  
**Phylogeny of the Herbaceous Tribe Spermacoceae (Rubiaceae) based on Plastid DNA Data.**  
 In: *Annals of the Missouri Botanical Garden* 96 (1), p. 109–132. DOI: 10.3417/2006201.
- GROENINCKX, INGE; OCHOTERENA, HELGA; SMETS, ERIK; DESSEIN, STEVEN (2010):  
**Molecular phylogenetic and morphological Study of *Kohautia* (Spermacoceae, Rubiaceae), with the Recognition of the new Genus *Cordylostigma*.**  
 In: *Taxon* 59 (5), p. 1457–1471.
- GUO, XING; WANG, RUI-JIANG; SIMMONS, MARK P.; BUT, PAUL PUI-HAY; YU, JING (2013):  
**Phylogeny of the Asian *Hedyotis*-*Oldenlandia* complex (Spermacoceae, Rubiaceae): Evidence for high Levels of Polyphyly and the parallel Evolution of diplophragmous Capsules.**  
 In: *Molecular Phylogenetics and Evolution* 67 (1), p. 110–122. DOI: 10.1016/j.ympev.2013.01.006.
- GUSTAFSSON, CLAES; PERSSON, CLAES (2002):  
**Phylogenetic Relationships among Species of the Neotropical Genus *Randia* (Rubiaceae, Gardenieae) inferred from molecular and morphological Data.**  
 In: *Taxon* 51, p. 661–674.
- HAMON, PERLA; GROVER, CORRINNE E.; DAVIS, AARON P.; RAKOTOMALALA, JEAN-JACQUES; RAHARIMALALA, NATHALIE E.; ALBERT, VICTOR A. ET AL. (2017):  
**Genotyping-by-Sequencing provides the first well-resolved Phylogeny for Coffee (*Coffea*) and Insights into the Evolution of caffeine Content in its species: GBS Coffee Phylogeny.**  
 In: *Molecular Phylogenetics and Evolution* 109, p. 351–361. DOI: 10.1016/j.ympev.2017.02.009.
- HUANG, WEI-PING; SUN, HANG; DENG, TAO; RAZAFIMANDIMBISON, SYLVAIN G.; NIE, ZE-LONG; WEN, JUN (2013):  
**Molecular Phylogenetics and Biogeography of the eastern Asian–eastern North American disjunct *Mitchella* and its close relative *Damnacanthus* (Rubiaceae, Mitchelleae).**  
 In: *Botanical Journal of the Linnean Society* 171, p. 395–412.
- JALALUDDIN, SUSAN; BRUHL, JEREMY J. (2008):  
**Testing Species limits in *Rennellia* (Prismatomerideae, Rubioideae, Rubiaceae).**  
 In: *Taxon* 57 (1), p. 43–52.
- JANSSENS, STEVEN B.; GROENINCKX, INGE; BLOCK, PETRA J.; VERSTRAETE, BRECHT; SMETS, ERIK F.; DESSEIN, STEVEN (2016):  
**Dispersing towards Madagascar: Biogeography and Evolution of the Madagascan endemics of the Spermacoceae Tribe (Rubiaceae).**  
 In: *Molecular Phylogenetics and Evolution* 95, p. 58–66. DOI: 10.1016/j.ympev.2015.10.024.
- KAINULAINEN, KENT; BREMER, BIRGITTA (2014):  
**Phylogeny of *Euclinia* and allied Genera of Gardenieae (Rubiaceae), and Description of *Melanoxerus*, an endemic Genus of Madagascar.**  
 In: *Taxon* 63 (4), p. 819–830. DOI: 10.12705/634.2.
- KAINULAINEN, KENT; MOULY, ARNAUD; KHODABANDEH, ANBAR; BREMER, BIRGITTA (2009):  
**Molecular phylogenetic Analysis of the Tribe Alberteae (Rubiaceae), with Description of a new Genus, *Razafimandimbisonia*.**  
 In: *Taxon* 58 (3), p. 757–768.

- KAINULAINEN, KENT; PERSSON, CLAES; ERIKSSON, TORSTEN; BREMER, BIRGITTA (2010):**  
**Molecular Systematics and morphological Character Evolution of the Condamineae (Rubiaceae).**  
In: American Journal of Botany 97 (12), p. 1961–1981. DOI: 10.3732/ajb.1000090.
- KAINULAINEN, KENT; RAZAFIMANDIMBISON, SYLVAIN G. (2016):**  
**New taxonomic Combinations in West Indian Ocean Vanguerieae (Rubiaceae).**  
In: Phytotaxa 282 (4), p. 267. DOI: 10.11646/phytotaxa.282.4.3.
- KAINULAINEN, KENT; RAZAFIMANDIMBISON, SYLVAIN G.; BREMER, BIRGITTA (2013):**  
**Phylogenetic Relationships and new tribal Delimitations in Subfamily Ixoroideae (Rubiaceae).**  
In: Botanical Journal of the Linnean Society 173, p. 387–406.
- KÄREHED, JESPER; BREMER, BIRGITTA (2007):**  
**The Systematics of Knoxieae (Rubiaceae) - molecular Data and their taxonomic Consequences.**  
In: Taxon 56 (4), p. 1051–1076.
- KÄREHED, JESPER; GROENINCKX, INGE; DESSEIN, STEVEN; MOTLEY, TIMOTHY J.; BREMER, BIRGITTA (2008):**  
**The phylogenetic utility of Chloroplast and nuclear DNA Markers and the Phylogeny of the Rubiaceae Tribe Spermaceae.**  
In: Molecular Phylogenetics and Evolution 49 (3), p. 843–866. DOI: 10.1016/j.ympev.2008.09.025.
- KHAN, SALEH AHAMMAD; RAZAFIMANDIMBISON, SYLVAIN G.; BREMER, BIRGITTA; LIEDE-SCHUMANN, SIGRID (2008):**  
**Phylogeny and Biogeography of the African Genus *Virectaria* Bremek. (Sabiceae s.l., Ixoroideae, Rubiaceae).**  
In: Plant Systematics and Evolution 275 (1-2), p. 43–58. DOI: 10.1007/s00606-008-0053-8.
- KHAN, SALEH AHAMMAD; RAZAFIMANDIMBISON, SYLVAIN G.; BREMER, BIRGITTA; LIEDE-SCHUMANN, SIGRID (2008):**  
**Sabiceae and Virectarieae (Rubiaceae, Ixoroideae): one or two Tribes? New tribal and generic Circumscriptions of Sabiceae and Biogeography of Sabicea s.l.**  
In: Taxon 57 (1), p. 7–23.
- KIRKBRIDE, JOSEPH H.; DELPRETE, PIERO G., JR. (2015):**  
**New Combinations in *Hexasepalum* (Rubiaceae: Spermaceae).**  
In: Journal of the Botanical Research Institute of Texas 9 (1), p. 103–106.
- KRÜGER, ÅSA; RAZAFIMANDIMBISON, SYLVAIN G.; BREMER, BIRGITTA (2012):**  
**Molecular Phylogeny of the Tribe Danaideae (Rubiaceae: Rubioideae): Another Example of out-of-Madagascar Dispersal.**  
In: Taxon 61 (3), p. 629–636.
- LANTZ, HENRIK; BREMER, BIRGITTA (2004):**  
**Phylogeny inferred from Morphology and DNA Data: Characterizing well-supported Groups in Vanguerieae (Rubiaceae).**  
In: Botanical Journal of the Linnean Society 146, p. 257–283.
- LANTZ, HENRIK; BREMER, BIRGITTA (2005):**  
**Phylogeny of the complex Vanguerieae (Rubiaceae) Genera *Fadogia*, *Rytigynia*, and *Vangueria* with close relatives and a new Circumscription of *Vangueria*.**  
In: Plant Systematics and Evolution 253 (1-4), p. 159–183. DOI: 10.1007/s00606-005-0313-9.
- LÖFSTRAND, STEFAN D.; KRÜGER, ÅSA; RAZAFIMANDIMBISON, SYLVAIN G.; BREMER, BIRGITTA (2014):**

**Phylogeny and Generic Delimitations in the Sister Tribes Hymenodictyeae and Naucleaeae (Rubiaceae).**

In: Systematic Botany 39 (1), p. 304–315. DOI: 10.1600/036364414X678116.

**MALCOMBER, SIMON T.; TAYLOR, CHARLOTTE M. (2009):**

**A Systematic Revision of *Gaertnera* (Rubiaceae, Gaertnereae).**

In: Annals of the Missouri Botanical Garden 96 (4), p. 575–671. DOI: 10.3417/2002161.

**MANN, ULRIKA; WIKSTRÖM, NIKLAS; TAYLOR, CHARLOTTE M.; BREMER, BIRGITTA (2012):**

**Historical Biogeography of the predominantly Neotropical Subfamily Cinchonoideae (Rubiaceae): into or out of America?**

In: International Journal of Plant Sciences 173 (3), p. 261–286. DOI: 10.1086/663971.

**MARTINEZ-CAMILO, RUBEN; MARTÍNEZ-MELENDÉZ, NAYELY; PÉREZ-FARRERA, MIGUEL ANGEL; LORENCE, DAVID H. (2011):**

**Una nueva Especie de *Pseudomiltemia* (Rubiaceae) de Chiapas, México.**

In: Brittonia 63 (2), p. 197–202.

**MAURIN, OLIVIER; DAVIS, AARON P.; CHESTER, MICHAEL; MVUNGI, ESTHER F.; JAUFERALLY-FAKIM, YASMINA; FAY, MICHAEL F. (2007):**

**Towards a Phylogeny for *Coffea* (Rubiaceae): identifying well-supported Lineages based on nuclear and Plastid DNA Sequences.**

In: Annals of Botany 100 (7), p. 1565–1583. DOI: 10.1093/aob/mcm257.

**MCDOWELL, TIM; VOLOVSEK, MIGUEL; MANOS, PAUL P. (2003):**

**Biogeography of *Exostema* (Rubiaceae) in the Caribbean Region in Light of molecular phylogenetic Analyses.**

In: Systematic Botany 28 (2), p. 431–441.

**MOTLEY, TIMOTHY J.; WURDACK, KENNETH J.J.; DELPRETE, PIERO G. (2005):**

**Molecular Systematics of the Catesbaeeae-Chiococceae Complex (Rubiaceae): Flower and Fruit Evolution and Biogeographic Implications.**

In: American Journal of Botany 92 (2), p. 316–329.

**MOULY, ARNAUD; KAINULAINEN, KENT; PERSSON, CLAES; DAVIS, AARON P.; WONG, KHOON MENG; RAZAFIMANDIMBISON, SYLVAIN G.; BREMER, BIRGITTA (2014):**

**Phylogenetic Structure and Clade Circumscriptions in the Gardenieae complex (Rubiaceae).**

In: Taxon 63 (4), p. 801–818. DOI: 10.12705/634.4.

**MOULY, ARNAUD; RAZAFIMANDIMBISON, SYLVAIN G.; FLORENCE, JACQUES; JÉRÉMIE, JOËL; BREMER, BIRGITTA (2009):**

**Paraphyly of *Ixora* and new Tribal Delimitation of Ixoreae (Rubiaceae): Inference from Combined Chloroplast (RPS16, RBCL, and trnT-F) Sequence Data.**

In: Annals of the Missouri Botanical Garden 96 (1), p. 146–160. DOI: 10.3417/2006194.

**MOULY, ARNAUD; RAZAFIMANDIMBISON, SYLVAIN G.; KHODABANDEH, ANBAR; BREMER, BIRGITTA (2009):**

**Phylogeny and Classification of the species-rich pantropical showy Genus *Ixora* (Rubiaceae-Ixoreae) with Indications of geographical monophyletic Units and Hybrids.**

In: American Journal of Botany 96 (3), p. 686–706. DOI: 10.3732/ajb.0800235.

**NAKAMURA, KOH; CHUNG, SHIH-WEN; KOKUBUGATA, GORO; DENDA, TETSUO; YOKOTA, MASATSUGU (2006):**

**Phylogenetic Systematics of the monotypic Genus *Hayataella* (Rubiaceae) endemic to Taiwan.**

In: Journal of Plant Research 119 (6), p. 657–661. DOI: 10.1007/s10265-006-0017-4.



NEGRÓN-ORTIZ, V.; WATSON, LINDA E. (2002):

**Molecular Phylogeny and Biogeography of *Erithalis* (Rubiaceae), an Endemic of the Caribbean Basin.**

In: *Plant Systematics and Evolution* 234 (1), p. 71–83. DOI: 10.1007/s00606-002-0192-2.

NEPOKROEFF, MOLLY; BREMER, BIRGITTA; SYTSMA, KENNETH J. (1999):

**Reorganization of the Genus *Psychotria* and Tribe Psychotrieae (Rubiaceae) inferred from ITS and rbcL Sequence Data.**

In: *Systematic Botany* 24 (1), p. 5–27.

NEPOKROEFF, MOLLY; SYTSMA, KENNETH J.; WAGNER, WARREN L.; ZIMMER, ELIZABETH A. (2003):

**Reconstructing Ancestral Patterns of Colonization and Dispersal in the Hawaiian Understory Tree Genus *Psychotria* (Rubiaceae): A Comparison of Parsimony and Likelihood Approaches.**

In: *Systematic Biology* 52 (6), p. 820–838. DOI: 10.1080/10635150390251072.

NEUPANE, SUMAN; DESSEIN, STEVEN; WIKSTRÖM, NIKLAS; LEWIS, PAUL O.; LONG, CHUNLIN; BREMER, BIRGITTA; MOTLEY, TIMOTHY J. (2015):

**The *Hedyotis*-*Oldenlandia* complex (Rubiaceae: Spermacoceae) in Asia and the Pacific: Phylogeny revisited with new generic Delimitations.**

In: *Taxon* 64 (2), p. 299–322. DOI: 10.12705/642.8.

OGURI, EMIKO; SUGAWARA, TAKASHI; PENG, CHING-I.; YANG, T. Y. ALECK; MURAKAMI, NORIAKI (2013):

**Geographical Origin and sexual-system Evolution of the androdioecious Plant *Gynochthodes boninensis* (Rubiaceae), endemic to the Bonin Islands, Japan.**

In: *Molecular Phylogenetics and Evolution* 68 (3), p. 699–708. DOI: 10.1016/j.ympev.2013.04.019.

OLIVEIRA, CAETANO TRONCOSO; GIACOMIN, LEANDRO L.; ZAPPI, DANIELA C. (2011):

***Kerianthera longiflora* (Rubiaceae), a remarkable new Species from eastern Brazil, with some observations on *K. preclara*.**

In: *Kew Bulletin* 66, p. 143–148.

PERSSON, CLAES (2000):

**Phylogeny of the Neotropical *Alibertia* Group (Rubiaceae), with Emphasis on the Genus *Alibertia*, inferred from ITS and 5s Ribosomal DNA Sequences.**

In: *American Journal of Botany* 87 (7), p. 1018–1028.

RAZAFIMANDIMBISON, SYLVAIN G.; KAINULAINEN, KENT; WONG, KHOON MENG; BEAVER, KATY; BREMER, BIRGITTA (2011):

**Molecular support for a basal Grade of morphologically distinct, monotypic Genera in the species-rich Vanguerieae alliance (Rubiaceae, Ixoroideae): Its systematic and conservation Implications.**

In: *Taxon* 60 (4), p. 941–952.

RAZAFIMANDIMBISON, SYLVAIN G.; KELLOGG, ELIZABETH A.; BREMER, BIRGITTA (2004):

**Recent Origin and phylogenetic utility of divergent ITS putative Pseudogenes: a case Study from Naucleaeae (Rubiaceae).**

In: *Systematic Biology* 53 (2), p. 177–192. DOI: 10.1080/10635150490423278.

RAZAFIMANDIMBISON, SYLVAIN G.; LANTZ, HENRIK; MOULY, ARNAUD; BREMER, BIRGITTA (2009):

**Evolutionary Trends, major Lineages, and new generic Limits in the dioecious Group of the Tribe Vanguerieae (Rubiaceae): Insights into the Evolution of functional Dioecy.**

In: *Annals of the Missouri Botanical Garden* 96 (1), p. 161–181. DOI: 10.3417/2006191.

- RAZAFIMANDIMBISON, SYLVAIN G.; MCDOWELL, TIMOTHY D.; HALFORD, DAVID A.; BREMER, BIRGITTA (2009):**  
**Molecular Phylogenetics and generic assessment in the Tribe Morindeae (Rubiaceae-Rubioideae): how to circumscribe *Morinda L.* to be monophyletic?**  
 In: Molecular Phylogenetics and Evolution 52 (3), p. 879–886. DOI: 10.1016/j.ympev.2009.04.007.
- RAZAFIMANDIMBISON, SYLVAIN G.; MOOG, JOACHIM; LANTZ, HENRIK; MASCHWITZ, ULRICH; BREMER, BIRGITTA (2005):**  
**Re-assessment of Monophyly, Evolution of Myrmecophytism, and rapid Radiation in *Neonauclea s.s.* (Rubiaceae).**  
 In: Molecular Phylogenetics and Evolution 34 (2), p. 334–354. DOI: 10.1016/j.ympev.2004.10.005.
- RAZAFIMANDIMBISON, SYLVAIN G.; RYDIN, CATARINA; BREMER, BIRGITTA (2008):**  
**Evolution and Trends in the Psychotrieae alliance (Rubiaceae)- a rarely reported evolutionary Change of many-seeded Carpels from one-seeded Carpels.**  
 In: Molecular Phylogenetics and Evolution 48 (1), p. 207–223. DOI: 10.1016/j.ympev.2008.03.034.
- RAZAFIMANDIMBISON, SYLVAIN G.; TAYLOR, CHARLOTTE M.; WIKSTRÖM, NIKLAS; PAILLER, THIERRY; KHODABANDEH, ANBAR; BREMER, BIRGITTA (2014):**  
**Phylogeny and generic limits in the sister Tribes Psychotrieae and Palicoureeae (Rubiaceae): Evolution of Schizocarps in *Psychotria* and Origins of bacterial Leaf Nodules of the Malagasy Species.**  
 In: American Journal of Botany 101 (7), p. 1102–1126. DOI: 10.3732/ajb.1400076.
- ROVA, JOHAN H.E.; DELPRETE, PIERO G.; BREMER, BIRGITTA (2009):**  
**The *Rondeletia* Complex (Rubiaceae): An attempt to use ITS, rps16, and trnL-F Sequence Data to delimit Guettardeae, Rondeletieae, and Sections within *Rondeletia*.**  
 In: Annals of the Missouri Botanical Garden 96 (1), p. 182–193. DOI: 10.3417/2006179.
- RYDIN, CATARINA; RAZAFIMANDIMBISON, SYLVAIN G.; BREMER, BIRGITTA (2008):**  
**Rare and enigmatic Genera (*Dunnia*, *Schizocolea*, *Colletocema*), sisters to species-rich Clades: Phylogeny and aspects of Conservation Biology in the Coffee Family.**  
 In: Molecular Phylogenetics and Evolution 48 (1), p. 74–83. DOI: 10.1016/j.ympev.2008.04.006.
- RYDIN, CATARINA; RAZAFIMANDIMBISON, SYLVAIN G.; KHODABANDEH, ANBAR; BREMER, BIRGITTA (2009):**  
**Evolutionary Relationships in the Spermacoceae alliance (Rubiaceae) using information from six molecular loci: Insights into systematic affinities of *Neohymenopogon* and *Mouretia*.**  
 In: Taxon 58 (3), p. 793–810.
- SALAS, ROBERTO MANUEL; CABRAL, ELSA L. (2011):**  
***Staelia culcita* (Rubiaceae), a new Species from Minas Gerais, Brazil.**  
 In: Plant Ecology and Evolution 144 (3), p. 372–376. DOI: 10.5091/plecevo.2011.620.
- SALAS, ROBERTO MANUEL; VIANA, PEDRO L.; CABRAL, ELSA L.; DESSEIN, STEVEN; JANSSENS, STEVEN B. (2015):**  
***Carajasia* (Rubiaceae), a new and endangered Genus from Carajás Mountain Range, Pará, Brazil.**  
 In: Phytotaxa 206 (1), p. 14. DOI: 10.11646/phytotaxa.206.1.4.
- SMEDMARK, JENNY E.E.; BREMER, BIRGITTA (2011):**  
**Molecular Systematics and incongruent Gene Trees of Urophylleae (Rubiaceae).**  
 In: Taxon 60 (5), p. 1397–1406.
- SMEDMARK, JENNY E.E.; RAZAFIMANDIMBISON, SYLVAIN G.; WIKSTRÖM, NIKLAS; BREMER, BIRGITTA (2014):**

**Inferring geographic range Evolution of a pantropical Tribe in the Coffee Family (Lasiantheae, Rubiaceae) in the face of topological Uncertainty.**

In: *Molecular Phylogenetics and Evolution* 70, p. 182–194. DOI: 10.1016/j.ympev.2013.09.007.

**SMEDMARK, JENNY E.E.; RYDIN, CATARINA; RAZAFIMANDIMBISON, SYLVAIN G.; KHAN, SALEH AHAMMAD; LIEDE-SCHUMANN, SIGRID; BREMER, BIRGITTA (2008):**

**A Phylogeny of Urophylleae (Rubiaceae) based on rps16 Intron Data.**

In: *Taxon* 57 (1), p. 24–32.

**SOZA, VALERIE L.; OLMSTEAD, RICHARD G. (2010):**

**Evolution of breeding systems and Fruits in New World *Galium* and Relatives (Rubiaceae).**

In: *American Journal of Botany* 97 (10), p. 1630–1646. DOI: 10.3732/ajb.1000130.

**SOZA, VALERIE L.; OLMSTEAD, RICHARD G. (2010):**

**Molecular Systematics of Tribe Rubieae (Rubiaceae): Evolution of major Clades, development of leaf-like Whorls, and Biogeography.**

In: *Taxon* 59 (3), p. 755–771.

**STRANCZINGER, SZILVIA; GALAMBOS, ANIKO; SZENASY, DALMA; SZALONTAI, BALINT (2014):**

**Phylogenetic Relationships in the Neotropical Tribe Hamelieae (Rubiaceae, Cinchonoideae) and Comments on its generic Limits.**

In: *Journal of Systematics and Evolution* 52 (5), p. 643–650. DOI: 10.1111/jse.12103.

**TAYLOR, CHARLOTTE M. (2004):**

**The Neotropical Genus *Ronabea* (Rubiaceae, Lasiantheae).**

In: *Systematics and Geography of Plants* 74 (1), p. 35–42.

**TAYLOR, CHARLOTTE M. (2014):**

**Rubiacearum Americanarum Magna Hama Pars XXXII. New Species and a new Combination in *Coussarea* (Coussareeae) from Western South America.**

In: *Brittonia* 66 (3), p. 256–268. DOI: 10.1007/s12228-014-9328-2.

**TAYLOR, CHARLOTTE M.; GEREAU, ROY E. (2013):**

**The Genus *Carapichea* (Rubiaceae, Psychotrieae).**

In: *Annals of the Missouri Botanical Garden* 99 (1), p. 100–127.

**TAYLOR, CHARLOTTE M.; NEILL, DAVID A.; GEREAU, ROY E. (2011):**

**Rubiacearum Americanarum Magna Hama Pars XXIX: Overview of the Neotropical Genus *Schizocalyx* (Condamineeae) and Description of two new Species.**

In: *Novon: A Journal for Botanical Nomenclature* 21 (4), p. 496–507. DOI: 10.3417/2008095.

**TERRELL, EDWARD E.; ROBINSON, HAROLD ERNEST (2009):**

**A new Genus, *Mexotis*, for five Mexican Species of Hedyotideae (Rubiaceae).**

In: *Journal of the Botanical Research Institute of Texas* 3 (1), p. 59–70.

**THULIN, MATS; BREMER, BIRGITTA (2004):**

**Studies in the Tribe Spermacoceae (Rubiaceae-Rubioideae): the Circumscriptions of *Amphiasma* and *Pentanopsis* and the Affinities of *Phylohydrax*.**

In: *Plant Systematics and Evolution* 247 (3-4). DOI: 10.1007/s00606-004-0155-x.

**TOSH, JAMES; DAVIS, AARON P.; DESSEIN, STEVEN; BLOCK, PETRA J.; HUYSMANS, SUZY; FAY, MIKE F. ET AL. (2009):**

**Phylogeny of *Tricalysia* (Rubiaceae) and its Relationships with allied Genera based on Plastid DNA Data: Resurrection of the Genus *Empogona*.**

In: *Annals of the Missouri Botanical Garden* 96 (1), p. 194–213. DOI: 10.3417/2006202.

VERSTRAETE, BRECHT; JANSSENS, STEVEN B.; LEMAIRE, BENNY; SMETS, ERIK; DESSEIN, STEVEN (2013):

**Phylogenetic Lineages in Vanguerieae (Rubiaceae) associated with *Burkholderia* Bacteria in Sub-Saharan Africa.**

In: American Journal of Botany 100 (12), p. 2380–2387. DOI: 10.3732/ajb.1300303.

VERSTRAETE, BRECHT; JANSSENS, STEVEN B.; RØNSTED, NINA (2017):

**Non-nodulated bacterial Leaf Symbiosis promotes the evolutionary Success of its Host Plants in the Coffee Family (Rubiaceae).**

In: Molecular Phylogenetics and Evolution 113, p. 161–168. DOI: 10.1016/j.ympev.2017.05.022.

VERSTRAETE, BRECHT; LACHENAUD, OLIVIER; SMETS, ERIK; DESSEIN, STEVEN; BONAVENTURE, SONKÉ (2013):

**Taxonomy and Phylogenetics of *Cuviera* (Rubiaceae/Vanguerieae) and Reinstatement of *Globulostylis* with the Description of three new Species.**

In: Botanical Journal of the Linnean Society 173, p. 407–441.

WEN, HAI-ZHEN; WANG, RUI-JIANG (2012):

***Foonchewia guangdongensis* gen. et sp. nov. (Rubioideae: Rubiaceae) and its systematic Position inferred from Chloroplast Sequences and Morphology.**

In: Journal of Systematics and Evolution 50 (5), p. 467–476. DOI: 10.1111/j.1759-6831.2012.00196.x.

WIKSTRÖM, NIKLAS; NEUPANE, SUMAN; KÅREHED, JESPER; MOTLEY, TIMOTHY J.; BREMER, BIRGITTA (2013):

**Phylogeny of *Hedyotis* L. (Rubiaceae: Spermaceae): Redefining a complex Asian-Pacific Assemblage.**

In: Taxon 62 (2), p. 357–374.

XIE, PEIWU; TU, TIE-YAO; RAZAFIMANDIMBISON, SYLVAIN G.; ZHU, CHENGJIE; ZHANG, DIAN-XIANG (2014):

**Phylogenetic Position of *Guihaiothamnus* (Rubiaceae): its evolutionary and ecological Implications.**

In: Molecular Phylogenetics and Evolution 78, p. 375–385. DOI: 10.1016/j.ympev.2014.05.022.

YANG, LI-E; MENG, YING; PENG, DE-LI; NIE, ZE-LONG; SUN, HANG (2018):

**Molecular Phylogeny of *Galium* L. of the Tribe Rubieae (Rubiaceae) - Emphasis on Chinese Species and Recognition of a new Genus *Pseudogalium*.**

In: Molecular Phylogenetics and Evolution 126, p. 221–232. DOI: 10.1016/j.ympev.2018.04.004.

YANG, LI-E; SUN, HANG; EHRENDORFER, FRIEDRICH; NIE, ZE-LONG (2016):

**Molecular Phylogeny of Chinese *Rubia* (Rubiaceae: Rubieae) inferred from nuclear and Plastid DNA Sequences.**

In: Journal of Systematics and Evolution 54 (1), p. 37–47. DOI: 10.1111/jse.12157.

## Rubiales

YANG, LEI-LEI; LI, HONG-LEI; WEI, LEI; YANG, TUO; KUANG, DAI-YONG; LI, MING-HONG ET AL. (2016):

**A Supermatrix Approach provides a comprehensive Genus-level Phylogeny for Gentianales.**

In: Journal of Systematics and Evolution 54 (4), p. 400–415. DOI: 10.1111/jse.12192.

## Ruppiaceae

ITO, YU; OHI-TOMA, TETSUO; MURATA, JIN; TANAKA, NORIO (2010):

**Hybridization and Polyploidy of an aquatic Plant, *Ruppia* (Ruppiaceae), inferred from Plastid and nuclear DNA Phylogenies.**

In: American Journal of Botany 97 (7), p. 1156–1167. DOI: 10.3732/ajb.0900168.

## Ruscaceae

KIM, JOO-HWAN; KIM, DONG-KAP; FOREST, FÉLIX; FAY, MICHAEL F.; CHASE, MARK W. (2010):

**Molecular Phylogenetics of Ruscaceae sensu lato and related families (Asparagales) based on Plastid and nuclear DNA Sequences.**

In: *Annals of Botany* 106 (5), p. 775–790. DOI: 10.1093/aob/mcq167.

**KIM, S.-C.; LEE, NAM SOOK (2007):**

**Generic Delimitation and Biogeography of *Maianthemum* and *Smilacina* (Ruscaceae sensu lato): preliminary Results based on partial 3' matK Gene and trnK 3' Intron Sequences of cpDNA.**

In: *Plant Systematics and Evolution* 265 (1-2), p. 1–12. DOI: 10.1007/s00606-007-0517-2.

**MENG, YING; NIE, ZE-LONG; DENG, TAO; WEN, JUN; YANG, YONG-PING (2014):**

**Phylogenetics and Evolution of Phyllotaxy in the Solomon's seal Genus *Polygonatum* (Asparagaceae: Polygonateae).**

In: *Botanical Journal of the Linnean Society* 176 (4), p. 435–451. DOI: 10.1111/boj.12218.

**MENG, YING; WEN, JUN; NIE, ZE-LONG; SUN, HANG; YANG, YONG-PING (2008):**

**Phylogeny and biogeographic Diversification of *Maianthemum* (Ruscaceae: Polygonateae).**

In: *Molecular Phylogenetics and Evolution* 49 (2), p. 424–434. DOI: 10.1016/j.ympev.2008.07.017.

**ROJAS-PIÑA, VANESSA; OLSON, MARK E.; ALVARADO-CÁRDENAS, LEONARDO O.; EGUIARTE, LUIS E. (2014):**

**Molecular Phylogenetics and Morphology of *Beaucarnea* (Ruscaceae) as distinct from *Nolina*, and the Submersion of *Calibanus* into *Beaucarnea*.**

In: *Taxon* 63 (6), p. 1193–1211. DOI: 10.12705/636.31.

**TILLICH, H.-J. (2005):**

**A key for *Aspidistra* (Ruscaceae), including fifteen new Species from Vietnam.**

In: *Feddes Repertorium* 116 (5-6), p. 313–338. DOI: 10.1002/fedr.200511076.

**TILLICH, H.-J.; AVERYANOV, LEONID V.; DZU, N. V. (2007):**

**Six new Species of *Aspidistra* (Ruscaceae) from northern Vietnam.**

In: *Blumea* 52 (2), p. 335–344. DOI: 10.3767/000651907X609070.

## **Rutaceae**

**APPELHANS, MARC S.; KROHM, SABRINA; MANAFZADEH, SARA; WEN, JUN (2016):**

**Phylogenetic Placement of *Psilopeganum*, a rare monotypic Genus of Rutaceae (the Citrus Family) endemic to China.**

In: *Journal of Systematics and Evolution* 54 (5), p. 535–544. DOI: 10.1111/jse.12208.

**APPELHANS, MARC S.; REICHEL, NIKLAS; GROppo, MILTON; PAETZOLD, CLAUDIA; WEN, JUN (2018):**

**Phylogeny and Biogeography of the pantropical Genus *Zanthoxylum* and its closest relatives in the Proto-Rutaceae Group (Rutaceae).**

In: *Molecular Phylogenetics and Evolution* 126, p. 31–44. DOI: 10.1016/j.ympev.2018.04.013.

**APPELHANS, MARC S.; SMETS, ERIK; RAZAFIMANDIMBISON, SYLVAIN G.; HAEVERMANS, THOMAS; VAN MARLE, E. J.; COULOUX, ARNAUD ET AL. (2011):**

**Phylogeny, evolutionary Trends and Classification of the *Spathelia-Ptaeroxylon* Clade: morphological and molecular Insights.**

In: *Annals of Botany* 107 (8), p. 1259–1277. DOI: 10.1093/aob/mcr076.

**APPELHANS, MARC S.; WAGNER, WARREN L.; WOOD, KENNETH R. (2014):**

***Melicope balgooyi* Appelhans, W.I. Wagner & K.R. Wood, a new Species and new Record in *Melicope* Section *Melicope* (Rutaceae) for the Austral Islands.**

In: *PhytoKeys* (39), p. 77–86. DOI: 10.3897/phytokeys.39.7691.

- APPELHANS, MARC S.; WEN, JUN; WAGNER, WARREN L. (2014):  
**A molecular Phylogeny of *Acronychia*, *Euodia*, *Melicope* and Relatives (Rutaceae) reveals polyphyletic Genera and Key Innovations for Species richness.**  
In: *Molecular Phylogenetics and Evolution* 79, p. 54–68. DOI: 10.1016/j.ympev.2014.06.014.
- APPELHANS, MARC S.; WEN, JUN; WOOD, KENNETH R.; ALLAN, GERARD J.; ZIMMER, ELIZABETH A.; WAGNER, WARREN L. (2014):  
**Molecular phylogenetic Analysis of Hawaiian Rutaceae (*Melicope*, *Platydesma* and *Zanthoxylum*) and their different Colonization Patterns.**  
In: *Botanical Journal of the Linnean Society* 174, p. 425–448.
- ARAÚJO, EDSON FREITAS DE; QUEIROZ, LUCIANO PAGANUCCI; MACHADO, MARCOS ANTÔNIO (2003):  
**What is *Citrus*? Taxonomic Implications from a Study of cp-DNA Evolution in the Tribe Citreae (Rutaceae Subfamily Aurantioideae).**  
In: *Organisms Diversity and Evolution* 3, p. 55–62.
- ARMSTRONG, JIM A. (2002):  
**The Genus *Zieria* (Rutaceae): a systematic and evolutionary Study.**  
In: *Australian Systematic Botany* 15 (3), p. 277–463. DOI: 10.1071/SB00040.
- BARRETT, ROSEMARY A.; BAYLY, MICHAEL J.; DURETTO, MARCO F.; FORSTER, PAUL I.; LADIGES, PAULINE Y.; CANTRILL, DAVID J. (2014):  
**A Chloroplast Phylogeny of *Zieria* (Rutaceae) in Australia and New Caledonia shows widespread Incongruence with Species-level Taxonomy.**  
In: *Australian Systematic Botany* 27 (6), p. 427–449. DOI: 10.1071/SB14033.
- BAYER, RANDALL J.; MABBERLEY, DAVID J.; MORTON, CYNTHIA M.; MILLER, CATHY H.; SHARMA, ISH K.; PFEIL, BERNARD E. ET AL. (2009):  
**A molecular Phylogeny of the Orange Subfamily (Rutaceae: Aurantioideae) using nine cpDNA Sequences.**  
In: *American Journal of Botany* 96 (3), p. 668–685. DOI: 10.3732/ajb.0800341.
- BAYLY, MICHAEL J.; DURETTO, MARCO F.; HOLMES, GARETH D.; FORSTER, PAUL I.; CANTRILL, DAVID J.; LADIGES, PAULINE Y. (2015):  
**Transfer of the New Caledonian Genus *Boronella* to *Boronia* (Rutaceae) based on Analyses of cpDNA and nrDNA.**  
In: *Australian Systematic Botany* 28 (3), p. 111–123. DOI: 10.1071/SB15008.
- BAYLY, MICHAEL J.; HOLMES, GARETH D.; FORSTER, PAUL I.; MUNZINGER, JÉRÔME; CANTRILL, DAVID J.; LADIGES, PAULINE Y. (2016):  
**Phylogeny, Classification and Biogeography of *Halfordia* (Rutaceae) in Australia and New Caledonia.**  
In: *Plant Systematics and Evolution* 302 (10), p. 1457–1470. DOI: 10.1007/s00606-016-1344-0.
- BRUNIERA, CARLA POLESSELLI; KALLUNKI, JACQUELYN A.; GROppo, MILTON (2015):  
***Almeidea* A.St.-Hil. belongs to *Conchocarpus* J.C. Mikan (Galipeinae, Rutaceae): Evidence from morphological and molecular Data, with a first Analysis of Subtribe Galipeinae.**  
In: *Public Library of Science One* 10 (5), e0125650. DOI: 10.1371/journal.pone.0125650.
- BUT, PAUL PUI-HAY; POON, ALICE WING-SEM; SHAW, PANG-CHUI; SIMMONS, MARK P.; GREGER, HARALD (2009):  
**Contribution of molecular Cladistics to the Taxonomy of Rutaceae in China.**  
In: *Journal of Systematics and Evolution* 47 (2), p. 144–150. DOI: 10.1111/j.1759-6831.2009.00013.x.
- CHOI, BO-KYUNG; DURETTO, MARCO F.; HONG, SUK-PYO (2012):

**Comparative Seed Morphology of *Boronia* and related Genera (Boroniinae: Rutaceae) and its systematic Implications.**

In: *Nordic Journal of Botany* 30 (2), p. 241–256. DOI: 10.1111/j.1756-1051.2011.01251.x.

**DIAS, PEDRO; UDULUTSCH, RENATA GIASSI; PIRANI, JOSÉ RUBENS (2015):**

**Molecular Phylogeny and Biogeography of the South-American Genus *Metrodorea* (Rutaceae).**

In: *Turkish Journal of Botany* 39, p. 825–834. DOI: 10.3906/bot-1410-49.

**FRENCH, PHILIPPA A.; BROWN, GILLIAN K.; BAYLY, MICHAEL J. (2016):**

**Incongruent Patterns of nuclear and Chloroplast Variation in *Correa* (Rutaceae): Introgression and Biogeography in South-eastern Australia.**

In: *Plant Systematics and Evolution* 302 (4), p. 447–468. DOI: 10.1007/s00606-016-1277-7.

**GROPPO, MILTON; PIRANI, JOSÉ RUBENS; SALATINO, MARIA LUIZA FARIA; BLANCO, SILVIA R.; KALLUNKI, JACQUELYN A. (2008):**

**Phylogeny of Rutaceae based on two non-coding Regions from cpDNA.**

In: *American Journal of Botany* 95 (8), p. 985–1005. DOI: 10.3732/ajb.2007313.

**MOLE, B. J.; UDOVICIC, FRANK; LADIGES, PAULINE Y.; DURETTO, MARCO F. (2004):**

**Molecular Phylogeny of *Phebalium* (Rutaceae: Boronieae) and related Genera based on the nrDNA Regions ITS 1+2.**

In: *Plant Systematics and Evolution* 249 (3-4), p. 197–212. DOI: 10.1007/s00606-004-0218-z.

**MORTON, CYNTHIA M. (2009):**

**Phylogenetic Relationships of the Aurantioideae (Rutaceae) based on the nuclear ribosomal DNA ITS Region and three noncoding Chloroplast DNA Regions, *atpB-rbcL* spacer, *rps16*, and *trnL-trnF*.**

In: *Organisms Diversity and Evolution* 9 (1), p. 52–68. DOI: 10.1016/j.ode.2008.11.001.

**OTHMAN, RAJA NUR ATEEKA; JORDAN, GREGORY J.; WORTH, JAMES R. P.; STEANE, DOROTHY A.; DURETTO, MARCO F. (2010):**

**Phylogeny and infrageneric Classification of *Correa* Andrews (Rutaceae) on the Basis of nuclear and Chloroplast DNA.**

In: *Plant Systematics and Evolution* 288 (3-4), p. 127–138. DOI: 10.1007/s00606-010-0315-0.

**POON, ALICE WING-SEM; SHAW, PANG-CHUI; SIMMONS, MARK P.; BUT, PAUL PUI-HAY (2007):**

**Congruence of Molecular, Morphological, and Biochemical Profiles in Rutaceae: a Cladistic Analysis of the Subfamilies Rutoideae and Toddalioideae.**

In: *Systematic Botany* 32 (4), p. 837–846.

**RAZAFIMANDIMBISON, SYLVAIN G.; APPELHANS, MARC S.; RABARISON, HARISON; HAEVERMANS, THOMAS; RAKOTONDRAFARA, ANDRIARIMALALA; RAKOTONANDRASANA, STEPHAN R. ET AL. (2010):**

**Implications of a molecular phylogenetic Study of the Malagasy Genus *Cedrelopsis* and its Relatives (Ptaeroxylaceae).**

In: *Molecular Phylogenetics and Evolution* 57 (1), p. 258–265. DOI: 10.1016/j.ympev.2010.06.023.

**SALVO, GABRIELE; BACCHETTA, GIANLUIGI; GHahremaninejad, FARROKH; CONTI, ELENA (2008):**

**Phylogenetic Relationships of Ruteae (Rutaceae): new Evidence from the Chloroplast Genome and comparisons with non-molecular Data.**

In: *Molecular Phylogenetics and Evolution* 49 (3), p. 736–748. DOI: 10.1016/j.ympev.2008.09.004.

**SALVO, GABRIELE; HO, SIMON Y.W.; ROSENBAUM, GIDEON; REE, RICHARD H.; CONTI, ELENA (2010):**

**Tracing the temporal and spatial Origins of Island Endemics in the Mediterranean Region: a case Study from the Citrus-family (*Ruta* L., Rutaceae).**

In: Systematic Biology 59 (6), p. 705–722. DOI: 10.1093/sysbio/syq046.

**SALVO, GABRIELE; MANAFZADEH, SARA; GHahremaninejad, FARROKH; TOJIBAEV, KOMILJON; ZELTNER, LOUIS; CONTI, ELENA (2011):**

**Phylogeny, Morphology, and Biogeography of *Haplophyllum* (Rutaceae), a species-rich Genus of the Irano-Turanian floristic Region.**

In: Taxon 60 (2), p. 513–527.

**SAMUEL, L.; EHRENDORFER, FRIEDRICH; CHASE, MARK W.; GREGER, HARALD (2001):**

**Phylogenetic Analyses of Aurantioideae (Rutaceae) based on Non-Coding Plastid DNA Sequences and Phytochemical Features.**

In: Plant Biology 3, p. 77–87.

**SHIVAKUMAR, VIKRAM S.; APPELHANS, MARC S.; JOHNSON, GABRIEL; CARLSEN, MÓNICA M.; ZIMMER, ELIZABETH A. (2017):**

**Analysis of whole Chloroplast Genomes from the Genera of the Clauseneae, the Curry Tribe (Rutaceae, Citrus-Family).**

In: Molecular Phylogenetics and Evolution 117, p. 135–140. DOI: 10.1016/j.ympev.2016.12.015.

**THIV, MIKE; VAN DER NIET, TIMOTHEÛS; RUTSCHMANN, FRANK; THULIN, MATS; BRUNE, THOMAS; LINDER, HANS PETER (2011):**

**Old-New World and Trans-African Disjunctions of *Thamnosma* (Rutaceae): intercontinental long-distance Dispersal and local Differentiation in the succulent Biome.**

In: American Journal of Botany 98 (1), p. 76–87. DOI: 10.3732/ajb.1000339.

**TRINDER-SMITH, TERRY H.; LINDER, HANS PETER; VAN DER NIET, TIMOTHEÛS; VERBOOM, GEORGE ANTHONY; NOWELL, TRACEY L. (2007):**

**Plastid DNA Sequences Reveal Generic Paraphyly within Diosmeae (Rutoideae, Rutaceae).**

In: Systematic Botany 32 (4), p. 847–855.

**WEGE, JULIET A. (2017):**

**Taxonomic Notes on *Asterolasia* (Rutaceae) in Western Australia to inform Conservation.**

In: Nuytsia 28, p. 141–146.

**XIE, RANG-JIN; ZHI-QIN; DENG, ZHOU LIE (2008):**

**Taxonomic and phylogenetic Relationships among the Genera of the True Citrus-Fruit Trees Group (Aurantioideae, Rutaceae) based on AFLP Markers.**

In: Journal of Systematics and Evolution 46 (5), p. 682–691.

**YAN, G.; SHAN, F.; PLUMMER, J. A. (2002):**

**Genomic Relationships within *Boronia* (Rutaceae) as revealed by karyotype Analysis and Rapid molecular Markers.**

In: Plant Systematics and Evolution 233 (3), p. 147–161. DOI: 10.1007/s00606-002-0202-4.

## **Sabiaceae**

**MORALES, J. FRANCISCO (2013):**

**Sinopsis del Género *Meliosma* (Sabiaceae) en México y Centroamérica.**

In: Phytoneuron 82, p. 1–86.



**YANG, TUO; LU, LI-MIN; WANG, WEI; LI, JIAN-HUA; MANCHESTER, STEVEN R.; WEN, JUN; CHEN, ZHI-DUAN (2018):  
Boreotropical Range Expansion and long-distance Dispersal explain two Amphipacific tropical Disjunctions in Salicaceae.**

In: *Molecular Phylogenetics and Evolution* 124, p. 181–191. DOI: 10.1016/j.ympev.2018.03.005.

**ZÚÑIGA, JOSE DANIEL (2015):**

**Phylogenetics of Salicaceae with Emphasis on *Meliosma* based on Nuclear and Chloroplast Data.**

In: *Systematic Botany* 40 (3), p. 761–775. DOI: 10.1600/036364415X689221.

## Salicaceae

**ABDOLLAHZADEH, A.; OSALOO, P. KAZEMPOUR OSALOO; MAASSOUMI, ALI AASGHAR (2011):**

**Molecular Phylogeny of the Genus *Salix* (Salicaceae) with an Emphasize to its Species in Iran.**

In: *Iranian Journal of Botany* 17 (2), p. 244–253.

**ALFORD, MAC H. (2006):**

**A taxonomic Revision of the Andean Genus *Pineda* (Salicaceae).**

In: *Kew Bulletin* 61, p. 205–214.

**ALFORD, MAC H. (2008):**

**Revision of *Neosprucea* (Salicaceae).**

In: *Systematic Botany Monographs* 85, p. 1–62.

**APPLEQUIST, WENDY L.; SCHATZ, GEORGE E. (2016):**

**A synoptic Revision of the Malagasy Species of *Scolopia* Schreb. (Salicaceae, Scolopieae).**

In: *Adansonia* 38 (1), p. 99–115. DOI: 10.5252/a2016n1a6.

**ARGUS, GEORGE W. (2007):**

***Salix* (Salicaceae) Distribution Maps and a Synopsis of their Classification in North America, North of Mexico.**

In: *Harvard Papers in Botany* 12 (2), p. 335–368. DOI: 10.3100/1043-4534(2007)12[335:SSDMAA]2.0.CO;2.

**AZUMA, TAKAYUKI; KAJITA, TADASHI; YOKOYAMA, JUN U.N.; OHASHI, HIROYOSHI (2000):**

**Phylogenetic Relationships of *Salix* (Salicaceae) based on *rbcl* Sequence Data.**

In: *American Journal of Botany* 87 (1), p. 67–75. DOI: 10.2307/2656686.

**CHEN, JIA-HUI; SUN, HANG; WEN, JUN; YANG, YONG-PING (2010):**

**Molecular Phylogeny of *Salix* L. (Salicaceae) inferred from three Chloroplast Datasets and its systematic Implications.**

In: *Taxon* 59 (1), p. 29–37. DOI: 10.1002/tax.591004.

**HAMZEH, MONA; DAYANANDAN, SELVADURAI (2004):**

**Phylogeny of *Populus* (Salicaceae) based on nucleotide Sequences of Chloroplast *Trnt-trnf* Region and nuclear *rDNA*.**

In: *American Journal of Botany* 91 (9), p. 1398–1408. DOI: 10.3732/ajb.91.9.1398.

**HARDIG, TERRY M.; ANTTILA, C. K.; BRUNSFELD, P. J. (2010):**

**A phylogenetic Analysis of *Salix* (Salicaceae) based on *matK* and Ribosomal DNA Sequence Data.**

In: *Journal of Botany* 2010 (8), p. 1–12. DOI: 10.1155/2010/197696.

**HUANG, DAISIE I.; HEFER, CHARLES A.; KOLOSOVA, NATALIA; DOUGLAS, CARL J.; CRONK, QUENTIN C.B. (2014):**

**Whole plastome Sequencing reveals deep Plastid Divergence and cytonuclear Discordance between closely related Balsam Poplars, *Populus balsamifera* and *P. trichocarpa* (Salicaceae).**

In: the new Phytologist 204 (3), p. 693–703. DOI: 10.1111/nph.12956.

**INGVARSSON, PÄR K. (2008):**

**Molecular Evolution of synonymous Codon usage in *Populus*.**

In: BMC Evolutionary Biology 8, p. 307. DOI: 10.1186/1471-2148-8-307.

**LEVSEN, NICHOLAS D.; TIFFIN, PETER; OLSON, MATTHEW P. (2012):**

**Pleistocene Speciation in the Genus *Populus* (Salicaceae).**

In: Systematic Biology 61 (3), p. 401–412. DOI: 10.1093/sysbio/syr120.

**LIU, XIA; WANG, ZHAOSHAN; WANG, DONGSHENG; ZHANG, JIANGUO (2016):**

**Phylogeny of *Populus-Salix* (Salicaceae) and their relative Genera using molecular Datasets.**

In: Biochemical Systematics and Ecology 68, p. 210–215. DOI: 10.1016/j.bse.2016.07.016.

**MARQUETE, RONALDO; MANSANO, VIDAL DE FREITAS (2012):**

**Taxonomic Revision of the *Casearia ulmifolia* Complex (Salicaceae).**

In: Novon: A Journal for Botanical Nomenclature 22 (2), p. 196–206. DOI: 10.3417/2011011.

**WAN, XUE QIN; ZHANG, FAN; ZHONG, YU; DING, YUN HAI; WANG, CHANG LIANG; HU, TING XIN (2013):**

**Study of genetic Relationships and Phylogeny of the native *Populus* in Southwest China based on nucleotide Sequences of Chloroplast trnT–trnF and nuclear DNA.**

In: Plant Systematics and Evolution 299 (1), p. 57–65. DOI: 10.1007/s00606-012-0702-9.

**WANG, DONGSHENG; WANG, ZHAOSHAN; DU, SHUHUI; ZHANG, JIANGUO (2015):**

**Phylogeny of Section *Leuce* (*Populus*, Salicaceae) inferred from 34 Chloroplast DNA fragments.**

In: Biochemical Systematics and Ecology 63, p. 212–217. DOI: 10.1016/j.bse.2015.09.020.

**WANG, ZHAOSHAN; DU, SHUHUI; DAYANANDAN, SELVADURAI; WANG, DONGSHENG; ZENG, YANFEI; ZHANG, JIANGUO (2014):**

**Phylogeny Reconstruction and hybrid Analysis of *Populus* (Salicaceae) based on nucleotide Sequences of multiple single-copy nuclear Genes and Plastid Fragments.**

In: Public Library of Science One 9 (8), e103645. DOI: 10.1371/journal.pone.0103645.

**WU, JIE; NYMAN, TOMMI; WANG, DONG-CHAO; ARGUS, GEORGE W.; YANG, YONG-PING; CHEN, JIA-HUI (2015):**

**Phylogeny of *Salix* Subgenus *Salix* s.l. (Salicaceae): Delimitation, Biogeography, and reticulate Evolution.**

In: BMC Evolutionary Biology 15, p. 31. DOI: 10.1186/s12862-015-0311-7.

## Salviniaceae

**METZGAR, JORDAN S.; SCHNEIDER, HARALD; PRYER, KATHLEEN M. (2007):**

**Phylogeny and Divergence Time Estimates for the Fern Genus *Azolla* (Salviniaceae).**

In: International Journal of Plant Sciences 168 (7), p. 1045–1953.

**NAGALINGUM, NATHALIE S.; NOWAK, MICHAEL D.; PRYER, KATHLEEN M. (2008):**

**Assessing phylogenetic Relationships in extant heterosporous Ferns (Salviniales), with a focus on *Pilularia* and *Salvinia*.**

In: Botanical Journal of the Linnean Society 157, p. 673–685.

**PEREIRA, ANA L.; MARTINS, MADALENA; OLIVEIRA, M. MARGARIDA; CARRAPIÇO, FRANCISCO (2011):**

**Morphological and genetic Diversity of the Family Azollaceae inferred from vegetative Characters and Rapid Markers.**

In: *Plant Systematics and Evolution* 297 (3-4), p. 213–226. DOI: 10.1007/s00606-011-0509-0.

REID, JILL D.; PLUNKETT, GREGORY M.; PETERS, GERALD A. (2006):

**Phylogenetic Relationships in the heterosporous Fern Genus *Azolla* (Azollaceae) based on DNA Sequence Data from three noncoding Regions.**

In: *International Journal of Plant Sciences* 167 (3), p. 529–538.

## Samolaceae

JONES, KEITH; ANDERBERG, ARNE A.; CRAENE, L. P. RONSE; WANNTORP, LIVIA (2012):

**Origin, Diversification, and Evolution of *Samolus valerandi* (Samolaceae, Ericales).**

In: *Plant Systematics and Evolution* 298 (8), p. 1523–1531. DOI: 10.1007/s00606-012-0655-z.

WANNTORP, LIVIA; ANDERBERG, ARNE A. (2011):

**Evolution and Diversification of Brook Weeds (*Samolus*, Samolaceae, Ericales).**

In: *International Journal of Plant Sciences* 172 (2), p. 250–266. DOI: 10.1086/657647.

## Santalaceae

DER, JOSHUA P.; NICKRENT, DANIEL LEE (2008):

**A molecular Phylogeny of Santalaceae (Santalales).**

In: *Systematic Botany* 33 (1), p. 107–116.

HARBAUGH, DANICA T. (2008):

**Polyloid and Hybrid Origins of Pacific Island Sandalwoods (*Santalum*, Santalaceae) inferred from Low-Copy Nuclear and Flow Cytometry Data.**

In: *International Journal of Plant Sciences* 169 (5), p. 677–685. DOI: 10.1086/533610.

HARBAUGH, DANICA T.; BALDWIN, BRUCE G. (2007):

**Phylogeny and Biogeography of the Sandalwoods (*Santalum*, Santalaceae): Repeated Dispersals throughout the Pacific.**

In: *American Journal of Botany* 94 (6), p. 1028–1040.

ROGERS, ZACHARY S.; NICKRENT, DANIEL LEE; MALÉCOT, VALÉRY (2008):

***Staufferia* and *Pilgerina*: Two new endemic monotypic arborescent Genera of Santalaceae from Madagascar.**

In: *Annals of the Missouri Botanical Garden* 95 (2), p. 391–404. DOI: 10.3417/2006148.

VIDAL-RUSSELL, ROMINA; NICKRENT, DANIEL LEE (2008):

**The first Mistletoes: Origins of aerial Parasitism in Santalales.**

In: *Molecular Phylogenetics and Evolution* 47 (2), p. 523–537. DOI: 10.1016/j.ympev.2008.01.016.

## Santalales

NICKRENT, DANIEL LEE; MALÉCOT, VALÉRY; VIDAL-RUSSELL, ROMINA; DER, JOSHUA P. (2010):

**A revised Classification of Santalales.**

In: *Taxon* 59 (2), p. 538–558.

## Sapindaceae

BUERKI, SVEN; DAVIDSON, CHRISTOPHER; PEREIRA, JOAN T.; CALLMANDER, MARTIN W. (2013):

**A new endemic Species of *Trigonachras* (Sapindaceae) from Sabah, Malaysia (Borneo).**

In: *Phytotaxa* 88 (2), p. 19–24. DOI: 10.11646/phytotaxa.88.2.1.

- BUERKI, SVEN; FOREST, FÉLIX; ACEVEDO-RODRÍGUEZ, PEDRO; CALLMANDER, MARTIN W.; NYLANDER, JOHAN A.A.; HARRINGTON, MARK G. ET AL. (2009):  
**Plastid and nuclear DNA Markers reveal intricate Relationships at subfamilial and tribal levels in the Soapberry Family (Sapindaceae).**  
In: *Molecular Phylogenetics and Evolution* 51 (2), p. 238–258. DOI: 10.1016/j.ympev.2009.01.012.
- BUERKI, SVEN; FOREST, FÉLIX; CALLMANDER, MARTIN W.; LOWRY, PORTER PRESCOTT II.; DEVEY, DION S.; MUNZINGER, JÉRÔME (2012):  
**Phylogenetic Inference of New Caledonian Lineages of Sapindaceae: molecular Evidence requires a Reassessment of generic Circumscriptions.**  
In: *Taxon* 61 (1), p. 109–119.
- BUERKI, SVEN; FOREST, FÉLIX; SALAMIN, NICOLAS; ALVAREZ, NADIR (2011):  
**Comparative performance of Supertree Algorithms in large Data sets using the Soapberry Family (Sapindaceae) as a case Study.**  
In: *Systematic Biology* 60 (1), p. 32–44. DOI: 10.1093/sysbio/syq057.
- BUERKI, SVEN; LOWRY, PORTER PRESCOTT II.; ALVAREZ, NADIR; RAZAFIMANDIMBISON, SYLVAIN G.; KÜPFER, PHILIPPE; CALLMANDER, MARTIN W. (2010):  
**Phylogeny and Circumscription of Sapindaceae revisited: molecular Sequence Data, Morphology and Biogeography support Recognition of a new Family, Xanthoceraceae.**  
In: *Plant Ecology and Evolution* 143 (2), p. 148–159. DOI: 10.5091/plecevo.2010.437.
- BUERKI, SVEN; LOWRY, PORTER PRESCOTT II.; ANDRIAMBOLOLONERA, SYLVIE; PHILLIPSON, PETER B.; VARY, LAURA; CALLMANDER, MARTIN W. (2011):  
**How to kill two Genera with one Tree: clarifying generic Circumscriptions in an endemic Malagasy Clade of Sapindaceae.**  
In: *Botanical Journal of the Linnean Society* 165, p. 223–234.
- BUERKI, SVEN; LOWRY, PORTER PRESCOTT; PHILLIPSON, PETER B.; CALLMANDER, MARTIN W. (2010):  
**Molecular phylogenetic and morphological Evidence supports Recognition of *Gereaua*, a new Endemic Genus of Sapindaceae from Madagascar.**  
In: *Systematic Botany* 35 (1), p. 172–180. DOI: 10.1600/036364410790862669.
- BUIJSEN, J. R. M.; VAN WELZEN, PETER C.; HAM, RAYMOND W.J.M. VAN DER (2003):  
**A phylogenetic Analysis of *Harpullia* (Sapindaceae) with Notes on Historical Biogeography.**  
In: *Systematic Botany* 28 (1), p. 106–117.
- COULLERI, J. P.; DEMATTEIS, MASSIMILIANO; FERRUCCI, M. P. (2012):  
**A new Insight into *Serjania* Mill. (Sapindaceae, Paullinieae) infrageneric Classification: a cytogenetic approach.**  
In: *Plant Systematics and Evolution* 298 (9), p. 1743–1753. DOI: 10.1007/s00606-012-0675-8.
- EDWARDS, K. J.; GADEK, PAUL A. (2001):  
**Evolution and Biogeography of *Alectryon* (Sapindaceae).**  
In: *Molecular Phylogenetics and Evolution* 20 (1), p. 14–26. DOI: 10.1006/mpev.2001.0952.
- FOREST, FÉLIX; DROUIN, JOSÉE NADIA; CHAREST, RENÉ; BROUILLET, LUC; BRUNEAU, ANNE (2001):  
**A morphological phylogenetic Analysis of *Aesculus* L. and *Billia* Peyr. (Sapindaceae).**  
In: *Canadian Journal of Botany* 79 (2), p. 154–169. DOI: 10.1139/cjb-79-2-154.
- GRIMM, GUIDO W.; DENK, THOMAS; HEMLEBEN, V. (2007):

**Evolutionary History and Systematics of *Acer* Section *Acer* – a case Study of low-level Phylogenetics.**

In: *Plant Systematics and Evolution* 267 (1-4), p. 215–253. DOI: 10.1007/s00606-007-0572-8.

**HARRINGTON, MARK G.; BIFFIN, ED; GADEK, PAUL A. (2009):**

**Comparative Study of the Evolution of nuclear ribosomal Spacers Incorporating secondary Structure Analyzes within Dodonaeoideae, Hippocastanoideae and Xanthoceroideae (Sapindaceae).**

In: *Molecular Phylogenetics and Evolution* 50 (2), p. 364–375. DOI: 10.1016/j.ympev.2008.11.010.

**HARRINGTON, MARK G.; EDWARDS, KAREN J.; JOHNSON, SHEILA A.; CHASE, MARK W.; GADEK, PAUL A. (2005):**

**Phylogenetic Inference in Sapindaceae sensu lato using Plastid matK and rbcL DNA Sequences.**

In: *Systematic Botany* 30 (2), p. 366–382.

**HARRINGTON, MARK G.; GADEK, PAUL A. (2010):**

**Phylogenetics of Hopbushes and Pepperflowers (*Dodonaea*, *Diplopeltis* - Sapindaceae), based on nuclear ribosomal ITS and partial ETS Sequences incorporating secondary-Structure Models.**

In: *Australian Systematic Botany* 23 (6), p. 431–442. DOI: 10.1071/SB10002.

**HARRIS, A. J.; FU, CHENG-XIN; XIANG, QIU-YUN JENNY; HOLLAND, LARINDA; WEN, JUN (2016):**

**Testing the Monophyly of *Aesculus* L. and *Billia* Peyr., woody Genera of Tribe Hippocastaneae of the Sapindaceae.**

In: *Molecular Phylogenetics and Evolution* 102, p. 145–151. DOI: 10.1016/j.ympev.2016.06.001.

**HARRIS, A. J.; XIANG, QIU-YUN; THOMAS, DAVID T. (2009):**

**Phylogeny, Origin, and biogeographic History of *Aesculus* L. (Sapindales) - an Update from combined Analysis of DNA Sequences, Morphology, and Fossils.**

In: *Taxon* 58 (1), p. 108–126.

**HOPKINS, HELEN C.F. (2013):**

**A second Species in the little known African Genus *Blighiopsis* (Sapindaceae).**

In: *Kew Bulletin* 68 (2), p. 345–353.

**LI, JIAN-HUA (2011):**

**Phylogenetic Evaluation of Series Delimitations in Section *Palmata* (*Acer*, Aceroideae, Sapindaceae) based on Sequences of Nuclear and Chloroplast Genes.**

In: *Aliso* 29 (1), p. 43–49.

**MUNZINGER, JÉRÔME; LOWRY, PORTER PRESCOTT; BUERKI, SVEN; CALLMANDER, MARTIN W. (2016):**

**A taxonomic Revision of the Endemic New Caledonian Genus *Storthocalyx* (Sapindaceae).**

In: *Systematic Botany* 41 (2), p. 387–400. DOI: 10.1600/036364416X691902.

**RENNER, SUSANNE S.; GRIMM, GUIDO W.; SCHNEEWEISS, GERALD M.; STUESSY, TOD F.; RICKLEFS, ROBERT E. (2008):**

**Rooting and dating Maples (*Acer*) with an uncorrelated-rates molecular clock: Implications for north American/Asian disjunctions.**

In: *Systematic Biology* 57 (5), p. 795–808. DOI: 10.1080/10635150802422282.

**URDAMPILLETA, J. D.; COULLERI, J. P.; FERRUCCI, M. S.; FORNI-MARTINS, E. R. (2013):**

**Karyotype Evolution and phylogenetic Analyses in the Genus *Cardiospermum* L. (Paullinieae, Sapindaceae).**

In: *Plant Biology* 15 (5), p. 868–881. DOI: 10.1111/j.1438-8677.2012.00679.x.

**WECKERLE, CAROLINE S.; RUTISHAUSER, ROLF (2003):**

**Comparative Morphology and Systematic Position of *Averrhoidium* within Sapindaceae.**

In: International Journal of Plant Sciences 164 (5), p. 775–792.

**ZHANG, ZHIHONG; LI, CHUNQI; LI, JIAN-HUA (2010):**

**Conflicting Phylogenies of Section *Macrantha* (Acer Aceroideae, Sapindaceae) based on Chloroplast and Nuclear DNA.**

In: Systematic Botany 35 (4), p. 801–810. DOI: 10.1600/036364410X539871.

## Sapindales

**MÜLLNER-RIEHL, ALEXANDRA N.; WEEKS, ANDREA; CLAYTON, JOSHUA W.; BUERKI, SVEN; NAUHEIMER, LARS; CHIANG, YU-CHUNG ET AL. (2016):**

**Molecular Phylogenetics and molecular Clock Dating of Sapindales based on Plastid *rbcl*, *atpB* and *trnL-trnF* DNA Sequences.**

In: Taxon 65 (5), p. 1019–1036. DOI: 10.12705/655.5.

## Sapotaceae

**ANDERBERG, ARNE A.; SWENSON, ULF (2003):**

**Evolutionary Lineages in Sapotaceae (Ericales): A Cladistic Analysis based on *ndhF* Sequence Data.**

In: International Journal of Plant Sciences 164 (5), p. 763–773.

**ARMSTRONG, K. E. (2013):**

**A Revision of the Asian-pacific Species of *Manilkara* (Sapotaceae).**

In: Edinburgh Journal of Botany 70 (1), p. 7–56. DOI: 10.1017/S0960428612000327.

**BARTISH, IGOR V.; SWENSON, ULF; MUNZINGER, JÉRÔME; ANDERBERG, ARNE A. (2005):**

**Phylogenetic Relationships among New Caledonian Sapotaceae (Ericales): molecular Evidence for generic Polyphyly and repeated Dispersal.**

In: American Journal of Botany 92 (4), p. 667–673. DOI: 10.3732/ajb.92.4.667.

**GAUTIER, LAURENT; NACIRI, YAMAMA; ANDERBERG, ARNE A.; SMEDMARK, JENNY E.E.; RANDRIANAIVO, RICHARD; SWENSON, ULF (2013):**

**A new species, Genus and Tribe of Sapotaceae, endemic to Madagascar.**

In: Taxon 62 (5), p. 972–983. DOI: 10.12705/625.17.

**SMEDMARK, JENNY E.E.; ANDERBERG, ARNE A. (2007):**

**Boreotropical migration explains Hybridization between geographically distant Lineages in the pantropical Clade *Sideroxyleae* (Sapotaceae).**

In: American Journal of Botany 94 (9), p. 1491–1505. DOI: 10.3732/ajb.94.9.1491.

**SMEDMARK, JENNY E.E.; SWENSON, ULF; ANDERBERG, ARNE A. (2006):**

**Accounting for Variation of Substitution Rates through Time in Bayesian Phylogeny Reconstruction of Sapotoideae (Sapotaceae).**

In: Molecular Phylogenetics and Evolution 39 (3), p. 706–721. DOI: 10.1016/j.ympev.2006.01.018.

**SWENSON, ULF; ANDERBERG, ARNE A. (2005):**

**Phylogeny, Character Evolution, and Classification of Sapotaceae (Ericales).**

In: Cladistics 21 (2), p. 101–130. DOI: 10.1111/j.1096-0031.2005.00056.x.

**SWENSON, ULF; BARTISH, IGOR V.; MUNZINGER, JÉRÔME (2007):**

**Phylogeny, diagnostic Characters and generic limitation of Australasian Chrysophylloideae (Sapotaceae, Ericales): Evidence from ITS Sequence Data and Morphology.**

In: *Cladistics* 23 (3), p. 201–228. DOI: 10.1111/j.1096-0031.2006.00141.x.

**SWENSON, ULF; LOWRY, PORTER PRESCOTT; MUNZINGER, JÉRÔME; RYDIN, CATARINA; BARTISH, IGOR V. (2008): Phylogeny and generic limits in the *Niemeyera complex* of New Caledonian Sapotaceae: Evidence of multiple Origins of the anisomerous Flower.**

In: *Molecular Phylogenetics and Evolution* 49 (3), p. 909–929. DOI: 10.1016/j.ympev.2008.09.022.

**SWENSON, ULF; MUNZINGER, JÉRÔME (2010):**

**Taxonomic Revision of *Pycnandra* Subgenus *Trouettia* (Sapotaceae), with six new Species from New Caledonia.**

In: *Australian Systematic Botany* 23 (5), p. 333–370. DOI: 10.1071/SB10025.

**SWENSON, ULF; MUNZINGER, JÉRÔME (2012):**

**Revision of *Pichonia* (Sapotaceae) in New Caledonia.**

In: *Australian Systematic Botany* 25 (1), p. 31–48. DOI: 10.1071/SB11027.

**SWENSON, ULF; MUNZINGER, JÉRÔME; BARTISH, IGOR V. (2007):**

**Molecular Phylogeny of *Planchonella* (Sapotaceae) and eight new Species from New Caledonia.**

In: *Taxon* 56 (2), p. 329–354. DOI: 10.1002/tax.562007.

**SWENSON, ULF; NYLINDER, STEPHAN; MUNZINGER, JÉRÔME (2013):**

**Towards a natural Classification of Sapotaceae Subfamily Chrysophylloideae in Oceania and Southeast Asia based on nuclear Sequence Data.**

In: *Taxon* 62 (4), p. 746–770. DOI: 10.12705/624.11.

**SWENSON, ULF; RICHARDSON, JAMES E.; BARTISH, IGOR V. (2008):**

**Multi-gene Phylogeny of the pantropical Subfamily Chrysophylloideae (Sapotaceae): Evidence of generic Polyphyly and extensive morphological Homoplasy.**

In: *Cladistics* 24 (6), p. 1006–1031. DOI: 10.1111/j.1096-0031.2008.00235.x.

**TERRA-ARAÚJO, MÁRIO H.; FARIA, APARECIDA D.; VICENTINI, ALBERTO; NYLINDER, STEPHAN; SWENSON, ULF (2015):**

**Species Tree Phylogeny and Biogeography of the Neotropical Genus *Pradosia* (Sapotaceae, Chrysophylloideae).**

In: *Molecular Phylogenetics and Evolution* 87, p. 1–13. DOI: 10.1016/j.ympev.2015.03.007.

**TRIONO, TEGUH; BROWN, ANTHONY H.D.; WEST, JUDY G.; CRISP, MICHAEL D. (2007):**

**A Phylogeny of *Pouteria* (Sapotaceae) from Malesia and Australasia.**

In: *Australian Systematic Botany* 20 (2), p. 107–118. DOI: 10.1071/SB06011.

## **Sarcolaenaceae**

**HONG-WA, CYNTHIA (2009):**

**Endemic families of Madagascar. XII. Resurrection and taxonomic Revision of the Genera *Mediusella* (Cavaco) Hutchinson and *Xerochlamys* Baker (Sarcolaenaceae).**

In: *Adansonia* 31 (2), p. 311–339. DOI: 10.5252/a2009n2a7.

**LOWRY, PORTER PRESCOTT II.; HAEVERMANS, THOMAS; LABAT, JEAN-NOEL; SCHATZ, GEORGE E.; LEROY, JEAN-FRANCOIS; WOLF, ANNE-ELIZABETH (2000):**

**Endemic families of Madagascar. V. A synoptic Revision of *Eremolaena*, *Pentachlaena* and *Perrierodendron* (Sarcolaenaceae).**

In: *Adansonia* 22 (1), p. 11–31.

LOWRY, PORTER PRESCOTT II.; SCHATZ, GEORGE E.; WOLF, ANNE-ELIZABETH (2002):

**Endemic families of Madagascar. VIII. A synoptic Revision of *Xyloolaena* Baill. (Sarcolaenaceae).**

In: *Adansonia* 24 (1), p. 7–19.

SCHATZ, GEORGE E.; LOWRY, PORTER PRESCOTT II.; WOLF, ANNE-ELIZABETH (2000):

**Endemic families of Madagascar. VI. A synoptic Revision of *Rhodolaena* (Sarcolaenaceae).**

In: *Adansonia* 22 (2), p. 239–252.

SCHATZ, GEORGE E.; LOWRY, PORTER PRESCOTT II.; WOLF, ANNE-ELIZABETH (2001):

**Endemic families of Madagascar. VII. A synoptic Revision of *Leptolaena* Thouars sensu stricto (Sarcolaenaceae).**

In: *Adansonia* 23 (2), p. 171–189.

## Sarraceniaceae

ELLISON, AARON M.; BUTLER, ELENA D.; HICKS, EMILY JEAN; NACZI, ROBERT F. C.; CALIE, PATRICK J.; BELL, CHARLES D.; DAVIS, CHARLES C. (2012):

**Phylogeny and Biogeography of the carnivorous Plant Family Sarraceniaceae.**

In: *Public Library of Science One* 7 (6), e39291. DOI: 10.1371/journal.pone.0039291.

STEPHENS, JESSICA D.; ROGERS, WILLIE L.; HEYDUK, KAROLINA; CRUSE-SANDERS, JENNIFER M.; DETERMANN, RON O.; GLENN, TRAVIS C.; MALMBERG, RUSSELL L. (2015):

**Resolving phylogenetic Relationships of the recently radiated carnivorous Plant Genus *Sarracenia* using target Enrichment.**

In: *Molecular Phylogenetics and Evolution* 85, p. 76–87. DOI: 10.1016/j.ympev.2015.01.015.

## Saururaceae

MENG, SHAO-WU; CHEN, ZHI-DUAN; LI, DE-ZHU; LIANG, HAN-XING (2002):

**Phylogeny of Saururaceae based on mitochondrial matR Gene Sequence Data.**

In: *Journal of Plant Research* 115, p. 71–76. DOI: 10.1007/s102650200011.

## Saxifragaceae

DENG, JIA-BIN; DREW, BRYAN T.; MAVRODIEV, EVGENY V.; GITZENDANNER, MATTHEW A.; SOLTIS, PAMELA S.; SOLTIS, DOUGLAS E. (2015):

**Phylogeny, Divergence times, and historical Biogeography of the Angiosperm Family Saxifragaceae.**

In: *Molecular Phylogenetics and Evolution* 83, p. 86–98. DOI: 10.1016/j.ympev.2014.11.011.

EBERSBACH, JANA; MÜLLNER-RIEHL, ALEXANDRA N.; MICHALAK, INGO; TKACH, NATALIA V.; HOFFMANN, MATTHIAS H.; RÖSER, MARTIN ET AL. (2017):

**In and out of the Qinghai-Tibet Plateau: Divergence time Estimation and historical Biogeography of the large arctic-alpine Genus *Saxifraga* L.**

In: *Journal of Biogeography* 44 (4), p. 900–910. DOI: 10.1111/jbi.12899.

GAO, QING-BO; LI, YIN-HU; GORNALL, RICHARD J.; ZHANG, ZHUO-XIN; ZHANG, FA-QI; XING, RUI ET AL. (2015):

**Phylogeny and Speciation in *Saxifraga* Sect. *Ciliatae* (Saxifragaceae): Evidence from psbA-trnH, trnL-F and ITS Sequences.**

In: *Taxon* 64 (4), p. 703–713. DOI: 10.12705/644.3.

MAS DE XAXARS, GEMMA; GARCÍA-FERNÁNDEZ, ALFREDO; BARNOLA, PERE; MARTÍN, JOAN; MERCADÉ, ARNAU; VALLÈS, JOAN ET AL. (2015):

**Phylogenetic and cytogenetic Studies reveal hybrid Speciation in *Saxifraga* Subsect. *Triplinervium* (Saxifragaceae).**



In: *Journal of Systematics and Evolution* 53 (1), p. 53–62. DOI: 10.1111/jse.12105.

**OKUYAMA, YUDAI; PELLMYR, OLLE; KATO, MAKOTO (2008):**

**Parallel Floral Adaptations to Pollination by Fungus Gnats within the Genus *Mitella* (Saxifragaceae).**

In: *Molecular Phylogenetics and Evolution* 46 (2), p. 560–575. DOI: 10.1016/j.ympev.2007.09.020.

**SOLTIS, DOUGLAS E.; TAGO-NAKAZAWA, MIYUKI; XIANG, QIU-YUN; KAWANO, SHOICHI; MURATA, JIN; WAKABAYASHI, MICHIO; HIBSCH-JETTER, CAROLA (2001):**

**Phylogenetic Relationships and Evolution in *Chrysosplenium* (Saxifragaceae) based on matK Sequence Data.**

In: *American Journal of Botany* 88 (5), p. 883–893.

**TKACH, NATALIA V.; RÖSER, MARTIN; HOFFMANN, MATTHIAS H. (2015):**

**Molecular Phylogenetics, Character Evolution and Systematics of the Genus *Micranthes* (Saxifragaceae).**

In: *Botanical Journal of the Linnean Society* 178, p. 47–66.

**TKACH, NATALIA V.; RÖSER, MARTIN; MIEHE, GEORG; MÜLLNER-RIEHL, ALEXANDRA N.; EBERSBACH, JANA; FAVRE, ADRIEN; HOFFMANN, MATTHIAS H. (2015):**

**Molecular Phylogenetics, Morphology and a revised Classification of the complex Genus *Saxifraga* (Saxifragaceae).**

In: *Taxon* 64 (6), p. 1159–1187. DOI: 10.12705/646.4.

**VARGAS, PABLO; MORTON, CYNTHIA M.; JURY, STEPHEN L. (1999):**

**Biogeographic Patterns in Mediterranean and Macaronesian Species of *Saxifraga* (Saxifragaceae) inferred from phylogenetic Analyses of ITS Sequences.**

In: *American Journal of Botany* 86 (5), p. 724–734.

**WINKLER, MANUELA; TRIBSCH, ANDREAS; SCHNEEWEISS, GERALD M.; BRODBECK, SABINE; GUGERLI, FELIX; HOLDEREGGER, ROLF; SCHÖNSWETTER, PETER (2013):**

**Strong nuclear differentiation contrasts with widespread sharing of Plastid DNA Haplotypes across Taxa in European purple Saxifrages (*Saxifraga* Section *Porphyron* subsection *Oppositifoliae*).**

In: *Botanical Journal of the Linnean Society* 173, p. 622–636.

**XIANG, CHUN-LEI; GITZENDANNER, MATTHEW A.; SOLTIS, DOUGLAS E.; PENG, HUA; LEI, LI-GONG (2012):**

**Phylogenetic Placement of the enigmatic and critically endangered Genus *Saniculiphyllum* (Saxifragaceae) inferred from combined Analysis of Plastid and nuclear DNA Sequences.**

In: *Molecular Phylogenetics and Evolution* 64 (2), p. 357–367. DOI: 10.1016/j.ympev.2012.04.010.

**ZHANG, DE-JUN; CHEN, SHENG-YUN; GAO, QING-BO (2008):**

**Circumscription and Phylogeny of *Saxifraga* Sect. *Ciliatae*: Evidence from nrDNA ITS Sequences.**

In: *Journal of Systematics and Evolution* 46 (5), p. 667–675.

**ZHU, WEI-DONG; NIE, ZE-LONG; WEN, JUN; SUN, HANG (2013):**

**Molecular Phylogeny and Biogeography of *Astilbe* (Saxifragaceae) in Asia and Eastern North America.**

In: *Botanical Journal of the Linnean Society* 171, p. 377–394.

## Saxifragales

JIAN, SHU-GUANG; SOLTIS, PAMELA S.; GITZENDANNER, MATTHEW A.; MOORE, MICHAEL J.; LI, RUI-QI; HENDRY, TORY A. ET AL. (2008):

**Resolving an ancient, rapid Radiation in Saxifragales.**

In: Systematic Biology 57 (1), p. 38–57. DOI: 10.1080/10635150801888871.

SOLTIS, DOUGLAS E.; MORT, MARK E.; LATVIS, MARIBETH; MAVRODIEV, EVGENY V.; O'MEARA, BRIAN C.; SOLTIS, PAMELA P. ET AL. (2013):

**Phylogenetic Relationships and Character Evolution Analysis of Saxifragales using a Supermatrix Approach.**

In: American Journal of Botany 100 (5), p. 916–929. DOI: 10.3732/ajb.1300044.

## Schisandraceae

DENK, THOMAS; OH, I.-C. (2005):

**Phylogeny of Schisandraceae based on morphological Data: Evidence from modern Plants and the fossil Record.**

In: Plant Systematics and Evolution 256 (1-4), p. 113–145. DOI: 10.1007/s00606-005-0327-3.

HAO, GANG (2001):

**A phylogenetic Analysis of the Schisandraceae based on Morphology and nuclear ribosomal ITS Sequences.**

In: Botanical Journal of the Linnean Society 135 (4), p. 401–411. DOI: 10.1006/bojl.2000.0420.

HAO, GANG; SAUNDERS, RICHARD M.K.; CHYE, MEE-LEN (2000):

**A phylogenetic Analysis of the Illiciaceae based on Sequences of internal transcribed Spacers (ITS) of nuclear ribosomal DNA.**

In: Plant Systematics and Evolution 223, p. 81–90.

LIU, ZHONG; HAO, GANG; LUO, YI-BO; THIEN, LEONARD B.; ROSSO, SAMUEL W.; LU, AN-MING; CHEN, ZHI-DUAN (2006):

**Phylogeny and Androecial Evolution in Schisandraceae, inferred from Sequences of Nuclear Ribosomal DNA ITS and Chloroplast DNA trnL-F Regions.**

In: International Journal of Plant Sciences 167 (3), p. 539–550.

## Schizaeaceae

WIKSTRÖM, NIKLAS; KENRICK, PAUL; VOGEL, JOHANNES C. (2002):

**Schizaeaceae: a phylogenetic approach.**

In: Review Palaobotany and Palynology 119, p. 35–50.

## Schlegeliaceae

BARRINGER, KERRY (2004):

**A Revision of *Gibsoniothamnus* L.O.Williams (Schlegeliaceae).**

In: Brittonia 56 (3), p. 213–237.

## Scrophulariaceae

ARCHIBALD, JENNY K.; MORT, MARK E.; WOLFE, ANDREA D. (2005):

**Phylogenetic Relationships within *Zaluzianskya* (Scrophulariaceae s. s., Tribe Manuleeae): Classification based on DNA Sequences from Multiple Genomes and Implications for Character Evolution and Biogeography.**

In: Systematic Botany 30 (1), p. 196–215.

GÁNDARA, ETELVINA; SOSA, VICTORIA (2013):

**Testing the Monophyly and Position of the North American shrubby Desert Genus *Leucophyllum* (Scrophulariaceae: Leucophylleae).**

In: Botanical Journal of the Linnean Society 171, p. 508–518.

**GÁNDARA, ETELVINA; SOSA, VICTORIA (2014):**

**Spatio-temporal Evolution of *Leucophyllum pringlei* and allies (Scrophulariaceae): a Group endemic to North American xeric Regions.**

In: Molecular Phylogenetics and Evolution 76, p. 93–101. DOI: 10.1016/j.ympev.2014.02.027.

**GHAHREMANINEJAD, FARROKH; RIAHI, MEHRSHID; BABAEI, MELINA; ATTAR, FARIDEH; BEHÇET, LÜTFİ; SONBOLI, ALI (2014):**

**Monophyly of *Verbascum* (Scrophularieae : Scrophulariaceae): Evidence from nuclear and Plastid phylogenetic Analyses.**

In: Australian Journal of Botany 62 (8), p. 638–646. DOI: 10.1071/BT14159.

**KARAVELIOGULLARI, FAİK AHMET; AYTAÇ, ZEKİ (2008):**

**Revision of the Genus *Verbascum* L. (Group A) in Turkey.**

In: Botany Research Journal 1 (1), p. 9–32.

**KORNHALL, PER (2004):**

**New Circumscription of the Tribe Limoselleae (Scrophulariaceae) that includes the Taxa of the Tribe Manuleeae.**

In: Botanical Journal of the Linnean Society 146, p. 453–467.

**KORNHALL, PER; HEIDARI, NAHID; BREMER, BIRGITTA (2001):**

**Selagineae and Manuleeae, two Tribes or one? Phylogenetic studies in the Scrophulariaceae.**

In: Plant Systematics and Evolution 228, p. 199–218.

**MOSYAKIN, SERGEI L.; TSYMBALYUK, ZOYA M. (2015):**

**Pollen Morphology of Tribes Aptosimeae and Myoporeae supports the phylogenetic Pattern in early-branching Scrophulariaceae revealed by molecular Studies.**

In: Willdenowia 45 (2), p. 209–222. DOI: 10.3372/wi.45.45207.

**NAVARRO-PÉREZ, MARÍA L.; LÓPEZ, JOSEFA; FERNÁNDEZ-MAZUECOS, MARIO; RODRÍGUEZ-RIAÑO, TOMÁS; VARGAS, PABLO; ORTEGA-OLIVENCIA, ANA (2013):**

**The role of Birds and Insects in Pollination Shifts of *Scrophularia* (Scrophulariaceae).**

In: Molecular Phylogenetics and Evolution 69 (1), p. 239–254. DOI: 10.1016/j.ympev.2013.05.027.

**OXELMAN, BENGT; KORNHALL, PER; OLMSTEAD, RICHARD G.; BREMER, BIRGITTA (2005):**

**Further disintegration of Scrophulariaceae.**

In: Taxon 54 (2), p. 411–425.

**SCHEUNERT, AGNES; HEUBL, GÜNTHER (2011):**

**Phylogenetic Relationships among New World *Scrophularia* L. (Scrophulariaceae): new Insights inferred from DNA Sequence Data.**

In: Plant Systematics and Evolution 291 (1-2), p. 69–89. DOI: 10.1007/s00606-010-0369-z.

**SCHEUNERT, AGNES; HEUBL, GÜNTHER (2014):**

**Diversification of *Scrophularia* (Scrophulariaceae) in the Western Mediterranean and Macaronesia - phylogenetic Relationships, reticulate Evolution and biogeographic Patterns.**

In: Molecular Phylogenetics and Evolution 70, p. 296–313. DOI: 10.1016/j.ympev.2013.09.023.

**TANK, DAVID C.; BEARDSLEY, PAUL M.; KELCHNER, SCOT A.; OLMSTEAD, RICHARD G. (2006):**

**Review of the Systematics of Scrophulariaceae s.l. and their current Disposition.**

In: Australian Systematic Botany 19 (4), p. 289–307. DOI: 10.1071/SB05009.

VERBOOM, GEORGE ANTHONY; HERRON, MARGARET L.; MONCRIEFF, GLENN R.; SLINGSBY, JASPER A. (2016):  
**Maintenance of Species integrity in the context of a recent Radiation: the case of *Jamesbrittenia* (Scrophulariaceae: Limoselleae) in southern Africa.**  
In: *Botanical Journal of the Linnean Society* 182, p. 115–139.

## Selaginellaceae

ARRIGO, NILS; THERRIEN, JAMES; ANDERSON, CAJSA LISA; WINDHAM, MICHAEL D.; HAUFLE, CHRISTOPHER H.; BARKER, MICHAEL P. (2013):

**A total Evidence approach to Understanding phylogenetic Relationships and ecological Diversity in *Selaginella* Subg. *Tetragonostachys*.**

In: *American Journal of Botany* 100 (8), p. 1672–1682. DOI: 10.3732/ajb.1200426.

KORALL, PETRA; KENRICK, PAUL (2004):

**The phylogenetic History of Selaginellaceae based on DNA Sequences from the Plastid and Nucleus: extreme Substitution Rates and Rate Heterogeneity.**

In: *Molecular Phylogenetics and Evolution* 31 (3), p. 852–864. DOI: 10.1016/j.ympev.2003.10.014.

WESTSTRAND, STINA; KORALL, PETRA (2016):

**A subgeneric Classification of *Selaginella* (Selaginellaceae).**

In: *American Journal of Botany* 103 (12), p. 2160–2169. DOI: 10.3732/ajb.1600288.

WESTSTRAND, STINA; KORALL, PETRA (2016):

**Phylogeny of Selaginellaceae: There is Value in Morphology after all!**

In: *American Journal of Botany* 103 (12), p. 2136–2159. DOI: 10.3732/ajb.1600156.

ZHOU, XIN-MAO; JIANG, LI-JÜ; ZHANG, LIANG; GAO, XIN-FEN; HE, ZHAO-RONG; ZHANG, LI-BING (2015):

**Spore Morphology of *Selaginella* (Selaginellaceae) from China and its systematic Significance.**

In: *Phytotaxa* 237 (1), p. 1. DOI: 10.11646/phytotaxa.237.1.1.

ZHOU, XIN-MAO; ROTHFELS, CARL J.; ZHANG, LIANG; HE, ZHAO-RONG; LE PÉCHON, TIMOTHÉE; HE, HAI ET AL. (2016):

**A large-scale Phylogeny of the Lycophyte Genus *Selaginella* (Selaginellaceae: Lycopodiopsida) based on Plastid and nuclear Loci.**

In: *Cladistics* 32 (4), p. 360–389. DOI: 10.1111/cla.12136.

ZHOU, XIN-MAO; ZHANG, LI-BING (2015):

**A Classification of *Selaginella* (Selaginellaceae) based on molecular (chloroplast and nuclear), macromorphological, and Spore Features.**

In: *Taxon* 64 (6), p. 1117–1140. DOI: 10.12705/646.2.

## Setchellanthaceae

HERNÁNDEZ-HERNÁNDEZ, TANIA; COLORADO, WENDY B.; SOSA, VICTORIA (2013):

**Molecular Evidence for the Origin and evolutionary History of the rare American Desert monotypic Family Setchellanthaceae.**

In: *Organisms Diversity and Evolution* 13 (4), p. 485–496. DOI: 10.1007/s13127-013-0136-4.

## Simaroubaceae

CLAYTON, JOSHUA W.; FERNANDO, EDWINO S.; SOLTIS, PAMELA S.; SOLTIS, DOUGLAS E. (2007):

**Molecular Phylogeny of the Tree-of-Heaven Family (Simaroubaceae) based on Chloroplast and Nuclear Markers.**

In: *International Journal of Plant Sciences* 168 (9), p. 1325–1339. DOI: 10.1086/521796.

CLAYTON, JOSHUA W.; SOLTIS, PAMELA S.; SOLTIS, DOUGLAS E. (2009):

**Recent long-distance Dispersal overshadows ancient biogeographical Patterns in a pantropical Angiosperm Family (Simaroubaceae, Sapindales).**

In: Systematic Biology 58 (4), p. 395–410. DOI: 10.1093/sysbio/syp041.

**DEVACCHI, MARCELO FERNANDO; THOMAS, WILLIAM WAYT; PLUNKETT, GREGORY M.; PIRANI, JOSÉ RUBENS (2018): Testing the Monophyly of *Simaba* (Simaroubaceae): Evidence from five molecular Regions and Morphology.**

In: Molecular Phylogenetics and Evolution 120, p. 63–82. DOI: 10.1016/j.ympev.2017.11.024.

## **Siparunaceae**

**RENNER, SUSANNE S.; HAUSNER, GERLINDE (2000):**

**New Species of *Siparuna* (Siparunaceae) III. Three new Species and one newly ranked Entity from Colombia, Ecuador, and Peru.**

In: Novon: A Journal for Botanical Nomenclature 10, p. 134–143.

**RENNER, SUSANNE S.; HAUSNER, GERLINDE (2005):**

**New Species of *Siparuna* (Siparunaceae) IV. A new Subcanopy Tree from White-Sand Areas in Brazil and Venezuela.**

In: Novon: A Journal for Botanical Nomenclature 15, p. 202–206.

## **Smilacaceae**

**CHEN, CHEN; QI, ZHE-CHEN; XU, XI-HUI; COMES, HANS PETER; KOCH, MARCUS A.; JIN, XIN-JIE ET AL. (2014):**

**Understanding the formation of Mediterranean-African-Asian disjunctions: Evidence for Miocene climate-driven Vicariance and recent long-distance Dispersal in the Tertiary relict *Smilax aspera* (Smilacaceae).**

In: the new Phytologist 204 (1), p. 243–255. DOI: 10.1111/nph.12910.

**CHEN, SHI-CHAO (2006):**

**A phylogenetic Analysis of the Smilacaceae based on morphological Data.**

In: Acta Phytotaxonomica Sinica 44 (2), p. 113–125. DOI: 10.1360/aps050065.

**FU, CHENG-XIN; KONG, HANGHUI; QIU, YING-XIONG; CAMERON, KENNETH M. (2005):**

**Molecular Phylogeny of the East Asian–North American disjunct *Smilax* Sect. *Nemexia* (Smilacaceae).**

In: International Journal of Plant Sciences 166 (2), p. 301–309.

**LI, PAN; LI, MIMI; SHI, YIN; ZHAO, YUNPENG; WAN, YING; FU, CHENG-XIN; CAMERON, KENNETH M. (2013):**

**Phylogeography of North American herbaceous *Smilax* (Smilacaceae): Combined AFLP and cpDNA Data support a northern Refugium in the Driftless Area.**

In: American Journal of Botany 100 (4), p. 801–814. DOI: 10.3732/ajb.1200250.

**QI, ZHE-CHEN; CAMERON, KENNETH M.; LI, PAN; ZHAO, YUNPENG; CHEN, SHI-CHAO; CHEN, GUANGCUN; FU, CHENG-XIN (2013):**

**Phylogenetics, Character Evolution, and Distribution Patterns of the Greenbriers, Smilacaceae (Liliales), a near-cosmopolitan Family of Monocots.**

In: Botanical Journal of the Linnean Society 173 (4), p. 535–548. DOI: 10.1111/boj.12096.

**QI, ZHE-CHEN; LI, P. A.N.; FU, CHENG-XIN (2013):**

**New Combinations and a new Name in *Smilax* for Species of *Heterosmilax* in Eastern and Southeast Asian Smilacaceae (Liliales).**

In: Phytotaxa 117 (2), p. 58. DOI: 10.11646/phytotaxa.117.2.4.

**ZHAO, YUNPENG; QI, ZHE-CHEN; MA, WEIWEI; DAI, QIONGYAN; LI, PAN; CAMERON, KENNETH M. ET AL. (2013):**

**Comparative Phylogeography of the *Smilax hispida* Group (Smilacaceae) in Eastern Asia and North America - Implications for allopatric Speciation, causes of Diversity Disparity, and Origins of temperate Elements in Mexico.**

In: *Molecular Phylogenetics and Evolution* 68 (2), p. 300–311. DOI: 10.1016/j.ympev.2013.03.025.

## **Solanaceae**

**AMES, MERCEDES; SPOONER, DAVID M. (2010):**

**Phylogeny of *Solanum* Series *Piurana* and related Species in *Solanum* Section *Petota* based on five conserved ortholog Sequences.**

In: *Taxon* 59 (4), p. 1091–1101.

**ANDO, TOSHIO; KOKUBUN, HISASHI; WATANABE, HITOSHI; TANAKA, NORIO; YUKAWA, TOMOHISA; HASHIMOTO, GORO ET AL. (2005):**

**Phylogenetic Analysis of *Petunia* sensu Jussieu (Solanaceae) using Chloroplast DNA Rflp.**

In: *Annals of Botany* 96 (2), p. 289–297. DOI: 10.1093/aob/mci177.

**AOKI, S.; ITO, MOTOMI (2000):**

**Molecular Phylogeny of *Nicotiana* (Solanaceae) based on the Nucleotide Sequence of the *matK* Gene.**

In: *Plant Biology* 2, p. 316–324.

**AUBRIOT, XAVIER; FLS, PARAMJIT SINGH; KNAPP, SANDRA (2016):**

**Tropical Asian Species show that the Old World Clade of ‘spiny Solanums’ (*Solanum* Subgenus *Leptostemonum* pro parte: Solanaceae) is not monophyletic.**

In: *Botanical Journal of the Linnean Society* 181, p. 199–223.

**AVERETT, JOHN E. (2009):**

***Schraderanthus*, a new Genus of Solanaceae.**

In: *Phytologia* 91 (1), p. 54–61.

**BOHS, LYNN (2007):**

**Phylogeny of the *Cyphomandra* Clade of the Genus *Solanum* (Solanaceae) based on ITS Sequence Data.**

In: *Taxon* 56 (4), p. 1012–1026.

**CARRIZO GARCÍA, CAROLINA; WAHLERT, GREGORY A.; OROZCO, CLARA INÉS; BARBOZA, GLORIA ESTELA; BOHS, LYNN (2015):**

**Phylogeny of the Andean Genus *Deprea* (Physalideae, Solanaceae): testing the generic Circumscription.**

In: *Phytotaxa* 238 (1), p. 71. DOI: 10.11646/phytotaxa.238.1.3.

**CHASE, MARK W.; KNAPP, SANDRA; COX, ANTONY V.; CLARKSON, JAMES J.; BUTSKO, YELENA; JOSEPH, JEFFREY A. ET AL. (2003):**

**Molecular Systematics, Gish and the Origin of hybrid Taxa in *Nicotiana* (Solanaceae).**

In: *Annals of Botany* 92 (1), p. 107–127. DOI: 10.1093/aob/mcg087.

**CHASE, SANDRA KNAPP; MARK W.; CLARKSON, JAMES J. (2004):**

**Nomenclatural Changes and a new sectional Classification in *Nicotiana* (Solanaceae).**

In: *Taxon* 53 (1), p. 73–82.

**CHEN, SUMEI; MATSUBARA, KIYOSHI; OMORI, TAKAHIRO; KOKUBUN, HISASHI; KODAMA, HIROAKI; WATANABE, HITOSHI ET AL. (2007):**

**Phylogenetic Analysis of the Genus *Petunia* (Solanaceae) based on the Sequence of the Hf1 gene.**

In: Journal of Plant Research 120 (3), p. 385–397. DOI: 10.1007/s10265-006-0070-z.

**CLARKSON, JAMES J.; KELLY, LAURA J.; LEITCH, ANDREW R.; KNAPP, SANDRA; CHASE, MARK W. (2010): Nuclear Glutamine Synthetase Evolution in *Nicotiana*: Phylogenetics and the Origins of allotetraploid and homoploid (diploid) Hybrids.**

In: Molecular Phylogenetics and Evolution 55 (1), p. 99–112. DOI: 10.1016/j.ympev.2009.10.003.

**CLARKSON, JAMES J.; KNAPP, SANDRA; GARCIA, VICENTE F.; OLMSTEAD, RICHARD G.; LEITCH, ANDREW R.; CHASE, MARK W. (2004):**

**Phylogenetic Relationships in *Nicotiana* (Solanaceae) inferred from multiple Plastid DNA Regions.**

In: Molecular Phylogenetics and Evolution 33 (1), p. 75–90. DOI: 10.1016/j.ympev.2004.05.002.

**DEANNA, ROCÍO; BARBOZA, GLORIA ESTELA; CARRIZO GARCÍA, CAROLINA (2018):**

**Phylogenetic Relationships of *Deprea*: new Insights into the evolutionary History of physaloid Groups.**

In: Molecular Phylogenetics and Evolution 119, p. 71–80. DOI: 10.1016/j.ympev.2017.11.001.

**DILLON, MICHAEL O.; TU, TIE-YAO; SOEJIMA, AKIKO; YI, TING-SHUANG; NIE, ZE-LONG; TYE, ALAN; WEN, JUN (2007):**

**Phylogeny of *Nolana* (Nolaneae, Solanoideae, Solanaceae) as inferred from granule-bound Starch Synthase I (Gbssi) Sequences.**

In: Taxon 56 (4), p. 1000–1011.

**FAJARDO, DIEGO; SPOONER, DAVID M. (2011):**

**Phylogenetic Relationships of *Solanum* Series *Conicibaccata* and related Species in *Solanum* Section *Petota* inferred from five conserved ortholog Sequences.**

In: Systematic Botany 36 (1), p. 163–170. DOI: 10.1600/036364411x553252.

**FILIPOWICZ, NATALIA; RENNER, SUSANNE P. (2012):**

***Brunfelsia* (Solanaceae): a Genus evenly divided between South America and Radiations on Cuba and other Antillean Islands.**

In: Molecular Phylogenetics and Evolution 64 (1), p. 1–11. DOI: 10.1016/j.ympev.2012.02.026.

**FLS, MARIA. P. VORONTSOVA; STERN, STEPHEN R.; BOHS, LYNN; KNAPP, SANDRA (2013):**

**African spiny *Solanum* (Subgenus *Leptostemonum*, Solanaceae): a thorny phylogenetic Tangle.**

In: Botanical Journal of the Linnean Society 173, p. 176–193.

**FREGONEZI, JEFFERSON NUNES; FREITAS, LORETA BRANDÃO; BONATTO, SANDRO LUIS; SEMIR, JOÃO; STEHMANN, RENATO (2012):**

**Infrageneric Classification of *Calibrachoa* (Solanaceae) based on morphological and molecular Evidence.**

In: Taxon 61 (1), p. 120–130.

**FUKUDA, TATSUYA; YOKOYAMA, JUN U.N.; OHASHI, HIROYOSHI (2001):**

**Phylogeny and Biogeography of the Genus *Lycium* (Solanaceae): Inferences from Chloroplast DNA Sequences.**

In: Molecular Phylogenetics and Evolution 19 (2), p. 246–258. DOI: 10.1006/mpev.2001.0921.

**GARCIA, VICENTE F.; OLMSTEAD, RICHARD G. (2003):**

**Phylogenetics of Tribe Anthocercideae (Solanaceae) based on *ndhF* and *trnL/F* Sequence Data.**

In: Systematic Botany 28 (3), p. 609–615.

**GATES, DANIEL J.; PILSON, DIANA; SMITH, STACEY DEWITT (2018):**

**Filtering of target Sequence capture Individuals facilitates Species Tree Construction in the plant Subtribe *Lochrominae* (Solanaceae).**

In: Molecular Phylogenetics and Evolution 123, p. 26–34. DOI: 10.1016/j.ympev.2018.02.002.

**JAMIL, ISHRAT; QAMARUNNISA, SYEDA; AZHAR, ABID; SHINWARI, ZABTA K.; ALI, SYED IRTFAQ; QAISER, MUHAMMAD (2014):**

**Subfamilial Relationships within Solanaceae as inferred from *atpβ-rbcL* Intergenic Spacer.**

In: Pakistan Journal of Botany 46 (2), p. 585–590.

**KELLY, LAURA J.; LEITCH, ANDREW R.; CLARKSON, JAMES J.; HUNTER, ROBIN B.; KNAPP, SANDRA; CHASE, MARK W. (2010):**

**Intragenic Recombination Events and Evidence for hybrid Speciation in *Nicotiana* (Solanaceae).**

In: Molecular Biology and Evolution 27 (4), p. 781–799. DOI: 10.1093/molbev/msp267.

**KELLY, LAURA J.; LEITCH, ANDREW R.; CLARKSON, JAMES J.; KNAPP, SANDRA; CHASE, MARK W. (2013):**

**Reconstructing the complex evolutionary Origin of wild allopolyploid Tobaccos (*Nicotiana* Section *suaveolentes*).**

In: Evolution 67 (1), p. 80–94. DOI: 10.1111/j.1558-5646.2012.01748.x.

**KNAPP, SANDRA; VORONTSOVA, MARIA P. (2016):**

**A Revision of the "African Non-Spiny" Clade of *Solanum* L. (*Solanum* Sections *Afrosolanum* Bitter, *Benderianum* Bitter, *Lemurisolanum* Bitter, *Lyciosolanum* Bitter, *Macronesiotes* Bitter, and *Quadrangulare* Bitter: Solanaceae).**

In: PhytoKeys (66), p. 1–142. DOI: 10.3897/phytokeys.66.8457.

**LEVIN, RACHEL A.; BERNARDELLO, GABRIEL; WHITING, CAROLYN; MILLER, JILL P. (2011):**

**A new generic Circumscription in Tribe Lycieae (Solanaceae).**

In: Taxon 60 (3), p. 681–690.

**LEVIN, RACHEL A.; BLANTON, JESSICA; MILLER, JILL P. (2009):**

**Phylogenetic utility of nuclear nitrate reductase: a multi-locus Comparison of nuclear and Chloroplast Sequence Data for Inference of Relationships among American Lycieae (Solanaceae).**

In: Molecular Phylogenetics and Evolution 50 (3), p. 608–617. DOI: 10.1016/j.ympev.2008.12.005.

**LEVIN, RACHEL A.; KEYES, EDMUND M.; MILLER, JILL P. (2015):**

**Evolutionary Relationships, Gynodioecy, and Polyploidy in the Galápagos Endemic *Lycium minimum* (Solanaceae).**

In: International Journal of Plant Sciences 176 (2), p. 197–210. DOI: 10.1086/679492.

**LEVIN, RACHEL A.; MILLER, JILL P. (2005):**

**Relationships within Tribe Lycieae (Solanaceae): Paraphyly of *Lycium* and multiple Origins of Gender Dimorphism.**

In: American Journal of Botany 92 (12), p. 2044–2053.

**LEVIN, RACHEL A.; MYERS, NICOLE R.; BOHS, LYNN (2006):**

**Phylogenetic Relationships among the "spiny *Solanums*" (*Solanum* Subgenus *Leptostemonum*, Solanaceae).**

In: American Journal of Botany 93 (1), p. 157–169.



- LEVIN, RACHEL A.; WATSON, KIMBERLY; BOHS, LYNN (2005):  
**A Four-gene Study of evolutionary Relationships in *Solanum* Section *Acanthophora*.**  
In: *American Journal of Botany* 92 (4), p. 603–612.
- LEVIN, RACHEL A.; WHELAN, ANDREW; MILLER, JILL P. (2009):  
**The utility of nuclear conserved Ortholog Set II (Cosii) genomic Regions for species-level phylogenetic Inference in *Lycium* (Solanaceae).**  
In: *Molecular Phylogenetics and Evolution* 53 (3), p. 881–890. DOI: 10.1016/j.ympev.2009.08.016.
- LI, HONG-QING; GUI, PING; XIONG, SHEN-ZHAN; AVERETT, JOHN E. (2013):  
**The generic Position of two Species of Tribe Physaleae (Solanaceae) inferred from three DNA Sequences: A case Study on *Physaliastrum* and *Archiphysalis*.**  
In: *Biochemical Systematics and Ecology* 50, p. 82–89. DOI: 10.1016/j.bse.2013.03.038.
- MARKS, CLAIRE E.; NEWBIGIN, ED; LADIGES, PAULINE Y. (2011):  
**Comparative Morphology and Phylogeny of *Nicotiana* Section *Suaveolentes* (Solanaceae) in Australia and the South Pacific.**  
In: *Australian Systematic Botany* 24 (2), p. 61. DOI: 10.1071/SB11006.
- MARTINE, CHRISTOPHER T.; ANDERSON, GREGORY J.; LES, DONALD H. (2009):  
**Gender-bending Aubergines: molecular Phylogenetics of cryptically dioecious *Solanum* in Australia.**  
In: *Australian Systematic Botany* 22 (2), p. 107–120. DOI: 10.1071/SB07039.
- MARTINE, CHRISTOPHER T.; VANDERPOOL, DAN; ANDERSON, GREGORY J.; LES, DONALD H. (2006):  
**Phylogenetic Relationships of Andromonoecious and Dioecious Australian Species of *Solanum* Subgenus *Leptostemonum* Section *Melongena*: Inferences from ITS Sequence Data.**  
In: *Systematic Botany* 31 (2), p. 410–420.
- MARTINS, TALLINE R.; BARKMAN, TODD J. (2005):  
**Reconstruction of Solanaceae Phylogeny using the Nuclear Gene SAMT.**  
In: *Systematic Botany* 30 (2), p. 435–447.
- MILLER, RYAN J.; MIONE, THOMAS; PHAN, HANH-LA; OLMSTEAD, RICHARD G. (2011):  
**Color by Numbers: Nuclear Gene Phylogeny of *Jaltomata* (Solanaceae), Sister Genus to *Solanum*, supports three Clades differing in Fruit Color.**  
In: *Systematic Botany* 36 (1), p. 153–162. DOI: 10.1600/036364411X553243.
- MONTERO-CASTRO, JUAN CARLOS; DELGADO-SALINAS, ALFONSO; LUNA, EFRAÍN DE; EGUIARTE, LUIS E. (2006):  
**Phylogenetic Analysis of *Cestrum* Section *Habrothamnus* (Solanaceae) based on Plastid and Nuclear DNA Sequences.**  
In: *Systematic Botany* 31 (4), p. 843–850.
- MORÉ, MARCELA; COCUCCI, ANDREA A.; SÉRSIC, ALICIA N.; BARBOZA, GLORIA ESTELA (2015):  
**Phylogeny and Floral trait Evolution in *Jaborosa* (Solanaceae).**  
In: *Taxon* 64 (3), p. 523–534. DOI: 10.12705/643.8.
- MUCHHALA, NATHAN; JOHNSEN, SÖNKE; SMITH, STACEY DEWITT (2014):  
**Competition for Hummingbird Pollination shapes Flower Color Variation in Andean Solanaceae.**  
In: *Evolution* 68 (8), p. 2275–2286. DOI: 10.1111/evo.12441.
- OLMSTEAD, RICHARD G.; BOHS, LYNN; MIGID, HALA ABDEL; SANTIAGO-VALENTIN, EUGENIO; GARCIA, VICENTE F.; COLLIER, SARAH M. (2008):

**A molecular Phylogeny of the Solanaceae.**

In: *Taxon* 57 (4), p. 1159–1181.

**OREJUELA, ANDRÉS; WAHLERT, GREGORY A.; OROZCO, CLARA INÉS; BARBOZA, GLORIA ESTELA; BOHS, LYNN (2017):  
Phylogeny of the Tribes Juanulloae and Solandreae (Solanaceae).**

In: *Taxon* 66 (2), p. 379–392. DOI: 10.12705/662.6.

**POCZAI, P.; TALLER, J.; SZABÓ, I. (2008):**

**Analysis of phylogenetic Relationships in the Genus *Solanum* (Solanaceae) as revealed by Rapid Markers.**

In: *Plant Systematics and Evolution* 275 (1-2), p. 59–67. DOI: 10.1007/s00606-008-0051-x.

**RAMOS-FREGONEZI, ALINE M. C.; FREGONEZI, JEFFERSON NUNES; CYBIS, GABRIELA B.; FAGUNDES, NELSON J. R.; BONATTO, SANDRO LUIS; FREITAS, LORETA BRANDÃO (2015):**

**Were Sea Level Changes during the Pleistocene in the South Atlantic Coastal Plain a driver of Speciation in *Petunia* (Solanaceae)?**

In: *BMC Evolutionary Biology* 15, p. 92. DOI: 10.1186/s12862-015-0363-8.

**RECK-KORTMANN, MAIKEL; SILVA-ARIAS, GUSTAVO ADOLFO; SEGATTO, ANA LÚCIA ANVERSA; MÄDER, GERALDO; BONATTO, SANDRO LUIS; FREITAS, LORETA BRANDÃO (2014):**

**Multilocus Phylogeny Reconstruction: new Insights into the evolutionary History of the Genus *Petunia*.**

In: *Molecular Phylogenetics and Evolution* 81, p. 19–28. DOI: 10.1016/j.ympev.2014.08.022.

**RECK-KORTMANN, MAIKEL; SILVA-ARIAS, GUSTAVO ADOLFO; STEHMANN, JOÃO R.; GREPPI, JULIÁN A.; FREITAS, LORETA BRANDÃO (2015):**

**Phylogenetic Relationships of *Petunia patagonica* (Solanaceae) revealed by molecular and biogeographical Evidence.**

In: *Phytotaxa* 222 (1), p. 17. DOI: 10.11646/phytotaxa.222.1.2.

**SÄRKINEN, TIINA E.; BARBOZA, GLORIA ESTELA; KNAPP, SANDRA (2015):**

**True Black Nightshades: Phylogeny and Delimitation of the Morelloid Clade of *Solanum*.**

In: *Taxon* 64 (5), p. 945–958. DOI: 10.12705/645.5.

**SÄRKINEN, TIINA E.; BOHS, LYNN; OLMSTEAD, RICHARD G.; KNAPP, SANDRA (2013):**

**A phylogenetic Framework for evolutionary Study of the nightshades (Solanaceae): a dated 1000-tip Tree.**

In: *BMC Evolutionary Biology* 13, p. 214. DOI: 10.1186/1471-2148-13-214.

**SMITH, STACEY DEWITT; BAUM, DAVID A. (2006):**

**Phylogenetics of the Florally diverse Andean Clade *Lochrominae* (Solanaceae).**

In: *American Journal of Botany* 93 (8), p. 1140–1153.

**STERN, STEPHEN R.; AGRA, FÁTIMA DE MARIA; BOHS, LYNN (2011):**

**Molecular Delimitation of Clades within New World Species of the "spiny *Solanums*" (*Solanum* Subg. *Leptostemonum*).**

In: *Taxon* 60 (5), p. 1429–1441.

**STERN, STEPHEN R.; BOHS, LYNN (2016):**

**An eight Marker Phylogeny of *Solanum* Sect. *Micracantha* (Solanaceae).**

In: *Systematic Botany* 41 (1), p. 120–127. DOI: 10.1600/036364416X690589.

**STERN, STEPHEN R.; WEESE, TERRI L.; BOHS, LYNN (2010):**

**Phylogenetic Relationships in *Solanum* Section *Androceras* (Solanaceae).**

In: *Systematic Botany* 35 (4), p. 885–893. DOI: 10.1600/036364410X539934.

- TATE, JENNIFER A.; ACOSTA, M. CRISTINA; MCDILL, JOSHUA R.; MOSCONE, EDUARDO A.; SIMPSON, BERYL B.; COCUCCI, ANDREA A. (2009):  
**Phylogeny and Character Evolution in *Nierembergia* (Solanaceae): Molecular, Morphological, and Cytogenetic Evidence.**  
In: Systematic Botany 34 (1), p. 198–206.
- TEPE, ERIC J.; BOHS, LYNN (2010):  
**A molecular Phylogeny of *Solanum* Sect. *Pterioidea* (Solanaceae) and the Utility of Cosii Markers in resolving Relationships among closely related Species.**  
In: Taxon 59 (3), p. 733–743.
- TEPE, ERIC J.; BOHS, LYNN (2011):  
**A Revision of *Solanum* Section *Herpystichum*.**  
In: Systematic Botany 36 (4), p. 1068–1087. DOI: 10.1600/036364411X605074.
- TEPE, ERIC J.; FARRUGGIA, FRANK T.; BOHS, LYNN (2011):  
**A 10-gene Phylogeny of *Solanum* Section *Herpystichum* (Solanaceae) and a Comparison of phylogenetic Methods.**  
In: American Journal of Botany 98 (8), p. 1356–1365. DOI: 10.3732/ajb.1000516.
- TU, TIE-YAO; DILLON, MICHAEL O.; SUN, HANG; WEN, JUN (2008):  
**Phylogeny of *Nolana* (Solanaceae) of the Atacama and Peruvian Deserts inferred from Sequences of four Plastid Markers and the nuclear Leafy second Intron.**  
In: Molecular Phylogenetics and Evolution 49 (2), p. 561–573. DOI: 10.1016/j.ympev.2008.07.018.
- TU, TIE-YAO; VOLIS, SERGEI; DILLON, MICHAEL O.; SUN, HANG; WEN, JUN (2010):  
**Dispersals of Hyoscyameae and Mandragoreae (Solanaceae) from the New World to Eurasia in the early Miocene and their biogeographic Diversification within Eurasia.**  
In: Molecular Phylogenetics and Evolution 57 (3), p. 1226–1237. DOI: 10.1016/j.ympev.2010.09.007.
- VOLKOV, ROMAN A.; KOMAROVA, NATALIYA Y.; PANCHUK, IRINA I.; HEMLEBEN, VERA (2003):  
**Molecular Evolution of rDNA external transcribed spacer and Phylogeny of Sect. *Petota* (genus *Solanum*).**  
In: Molecular Phylogenetics and Evolution 29 (2), p. 187–202. DOI: 10.1016/S1055-7903(03)00092-7.
- WALSH, BRIAN M.; HOOT, SARA B. (2001):  
**Phylogenetic Relationships of *Capsicum* (Solanaceae) using DNA Sequences from Two Noncoding Regions: the Chloroplast atpB-rbcL Spacer Region and Nuclear waxy Introns.**  
In: International Journal of Plant Sciences 162 (6), p. 1409–1418.
- WEESE, TERRI L.; BOHS, LYNN (2007):  
**A Three-Gene Phylogeny of the Genus *Solanum* (Solanaceae).**  
In: Systematic Botany 32 (2), p. 445–463.
- WEESE, TERRI L.; BOHS, LYNN (2010):  
**Eggplant Origins: Out of Africa, into the Orient.**  
In: Taxon 59 (1), p. 49–56.
- WHITSON, MAGGIE; MANOS, PAUL P. (2005):  
**Untangling *Physalis* (Solanaceae) from the Physaloids: A Two-Gene Phylogeny of the Physalinae.**  
In: Systematic Botany 30 (1), p. 216–230.

ZAMBERLAN, PRISCILLA M.; RODRIGUES, IZABELLA M. C.; GERALDO MÄDER, LUANA CASTRO, JOÃO R. STEHMANN;  
BONATTO, SANDRO LUIS; FREITAS, LORETA BRANDÃO (2015):

**Re-evaluation of the generic Status of *Athenaea* and *Aureliana* (Withaniinae, Solanaceae) based on molecular Phylogeny and Morphology of the Calyx.**

In: *Botanical Journal of the Linnean Society* 177, p. 322–334.

ZAMORA-TAVARES, MARÍA DEL PILAR; MARTÍNEZ, MAHINDA; MAGALLÓN, SUSANA; GUZMÁN-DÁVALOS, LAURA;  
VARGAS-PONCE, OFELIA (2016):

***Physalis* and physaloids: A recent and complex evolutionary History.**

In: *Molecular Phylogenetics and Evolution* 100, p. 41–50. DOI: 10.1016/j.ympev.2016.03.032.

## Stachyuraceae

ZHU, YU-PING; WEN, JUN; ZHANG, ZHI-YUN; CHEN, ZHI-DUAN (2006):

**Evolutionary Relationships and Diversification of Stachyuraceae based on Sequences of four Chloroplast Markers and the nuclear ribosomal ITS Region.**

In: *Taxon* 55 (4), p. 931–940. DOI: 10.2307/25065687.

## Staphyleaceae

HARRIS, A. J.; CHEN, PING-TING; XU, XIN-WEI; ZHANG, JIAN-QIANG; YANG, XUE; WEN, JUN (2017):

**A molecular Phylogeny of Staphyleaceae: Implications for generic Delimitation and classical biogeographic Disjunctions in the Family.**

In: *Journal of Systematics and Evolution* 55 (2), p. 124–141. DOI: 10.1111/jse.12236.

## Stemonaceae

FAN, LAN-LAN; ZHU, SHU; CHEN, HU-BIAO; YANG, DONG-HUI; CAI, SHAO-QING; KOMATSU, KATSUKO (2009):

**Molecular Analysis of *Stemona* Plants in China based on Sequences of four Chloroplast DNA Regions.**

In: *Biological and Pharmaceutical Bulletin* 32 (8), p. 1439–1446. DOI: 10.1248/bpb.32.1439.

LI, EN-XIANG; YI, SUN; QIU, YING-XIONG; GUO, JIANG-TAO; COMES, HANS PETER; FU, CHENG-XIN (2008):

**Phylogeography of two East Asian Species in *Croomia* (Stemonaceae) inferred from Chloroplast DNA and I SSR Fingerprinting Variation.**

In: *Molecular Phylogenetics and Evolution* 49 (3), p. 702–714. DOI: 10.1016/j.ympev.2008.09.012.

## Stemonuraceae

MUNZINGER, JÉRÔME; MCPHERSON, GORDON; LOWRY, PORTER PRESCOTT II. (2008):

**A second Species in the endemic New Caledonian Genus *Gastrolepis* (Stemonuraceae) and its Implications for the conservation Status of high-altitude Maquis Vegetation: coherent application of the IUCN Red List Criteria is urgently needed in New Caledonia.**

In: *Botanical Journal of the Linnean Society* 157, p. 775–783.

SCHORI, MELANIE (2010):

**A Systematic Revision of *Gomphandra* (Stemonuraceae).**

Dissertation. Ohio University, Faculty of the College of Arts and Sciences of Ohio University.

SCHORI, MELANIE; UTTERIDGE, TIMOTHY M.A. (2010):

**Three new Species and a new name in Southeast Asian *Gomphandra* (Stemonuraceae / Icacinaceae s.l.).**

In: *Blumea* 55 (2), p. 189–195. DOI: 10.3767/000651910X527699.

UTTERIDGE, TIMOTHY M.A. (2011):

**A Revision of the Genus *Medusanthera* (Stemonuraceae, Icacinaceae s.l.).**

In: Kew Bulletin 66, p. 49–81.

## **Sterculiaceae**

**DORR, L.J.; CHEEK, MARTIN R. (2011):**

**The identity and typification of *Pimia* Seem. (Sterculiaceae).**

In: Kew Bulletin 66, p. 629–631.

**WILKIE, PETER; CLARK, ALEXANDRA; PENNINGTON, R. TOBY; CHEEK, MARTIN R.; BAYER, CLEMENS; WILCOCK, CHRIS C. (2006):**

**Phylogenetic Relationships within the Subfamily Sterculioideae (Malvaceae/Sterculiaceae-Sterculieae) using the Chloroplast Gene *ndhF*.**

In: Systematic Botany 31 (1), p. 160–170.

## **Strelitziaceae**

**CRON, GLYNIS V.; PIRONE, CARY; BARTLETT, MADELAINE; KRESS, W. JOHN; SPECHT, CHELSEA D. (2012):**

**Phylogenetic Relationships and Evolution in the Strelitziaceae (Zingiberales).**

In: Systematic Botany 37 (3), p. 606–619. DOI: 10.1600/036364412X648562.

## **Stylidiaceae**

**GLENNY, DAVID P. (2009):**

**A Revision of the Genus *Forstera* (Stylidiaceae) in New Zealand.**

In: New Zealand Journal of Botany 47 (3), p. 285–315. DOI: 10.1080/00288250909509811.

**LAURENT, NADINA; BREMER, BIRGITTA; BREMER, KARE (1998):**

**Phylogeny and Generic Interrelationships of the Stylidiaceae (Asterales), with a possible extreme Case of Floral Paedomorphosis.**

In: Systematic Botany 23 (3), p. 289. DOI: 10.2307/2419506.

**WEGE, JULIET A. (2012):**

**Navigating the Floral Milky Way: the Taxonomy of the microgeophytic Triggerplants (*Stylidium petiolare* and allies: Stylidiaceae).**

In: Australian Systematic Botany 25 (2), p. 138. DOI: 10.1071/SB12001.

## **Styracaceae**

**FRITSCH, PETER W. (2001):**

**Phylogeny and Biogeography of the flowering plant Genus *Styrax* (Styracaceae) based on Chloroplast DNA Restriction Sites and DNA Sequences of the Internal Transcribed Spacer Region.**

In: Molecular Phylogenetics and Evolution 19 (3), p. 387–408. DOI: 10.1006/mpev.2001.0933.

**FRITSCH, PETER W. (2004):**

**New Species and taxonomic Changes in *Styrax* (Styracaceae) from South America.**

In: Novon: A Journal for Botanical Nomenclature 14 (1), p. 43–57.

**FRITSCH, PETER W.; MORTON, CYNTHIA M.; CHEN, TAO; MELDRUM, CANDICE (2001):**

**Phylogeny and Biogeography of the Styracaceae.**

In: International Journal of Plant Sciences 162 (S6), S95–S116. DOI: 10.1086/323418.

**YAO, XIAOHONG; YE, QIGANG; FRITSCH, PETER W.; CRUZ, BONI C.; HUANG, HONGWEN (2008):**

**Phylogeny of *Sinojackia* (Styracaceae) based on DNA Sequence and Microsatellite Data: Implications for Taxonomy and Conservation.**

In: Annals of Botany 101 (5), p. 651–659. DOI: 10.1093/aob/mcm332.

## **Symplocaceae**

FRITSCH, PETER W.; AL, FRANK (2015):

**A taxonomic Revision of Antillean *Symplocos* (Symplocaceae).**

In: Phytotaxa 194 (1), p. 1. DOI: 10.11646/phytotaxa.194.1.1.

FRITSCH, PETER W.; CRUZ, BONI C.; ALMEDA, FRANK; WANG, YUGUO; SHI, SU-HUA (2006):

**Phylogeny of *Symplocos* based on DNA Sequences of the Chloroplast trnC-trnD Intergenic Region.**

In: Systematic Botany 31 (1), p. 181–192.

FRITSCH, PETER W.; KELLY, LAWRENCE M.; WANG, YUGUO; ALMEDA, FRANK; KRIEBEL, RICARDO (2008):

**Revised infrafamilial Classification of Symplocaceae based on phylogenetic Data from DNA Sequences and Morphology.**

In: Taxon 57 (3), p. 823–852. DOI: 10.1002/tax.573013.

SOEJIMA, AKIKO; NAGAMASU, HIDETOSHI (2004):

**Phylogenetic Analysis of Asian *Symplocos* (Symplocaceae) based on nuclear and Chloroplast DNA Sequences.**

In: Journal of Plant Research 117 (3), p. 199–207. DOI: 10.1007/s10265-004-0151-9.

WANG, YUGUO; FRITSCH, PETER W.; SHI, SU-HUA; ALMEDA, FRANK; CRUZ, BONI C.; KELLY, LAWRENCE M. (2004):

**Phylogeny and infrageneric Classification of *Symplocos* (Symplocaceae) inferred from DNA Sequence Data.**

In: American Journal of Botany 91 (11), p. 1901–1914. DOI: 10.3732/ajb.91.11.1901.

## Talinaceae

NYFFELER, RETO; EGGLI, URS (2010):

**Disintegrating Portulacaceae: A new familial Classification of the Suborder Portulacineae (Caryophyllales) based on molecular and morphological Data.**

In: Taxon 59 (1), p. 227–240.

## Tamaricaceae

ARIANMANESH, REZA; MEHREGAN, IRAJ; NEJADSATTARI, TAHER; ASSADI, MOSTAFA (2015):

**Molecular Phylogeny of *Tamarix* (Tamaricaceae) Species from Iran based on ITS Sequence Data.**

In: European Journal of Experimental Biology 5 (6), p. 44–50.

CHEN, YOUHUA (2013):

**A Revisited Study on Phylogeography and phylogenetic Diversity of *Myricaria* (Tamaricaceae).**

In: Journal of Ecosystem & Ecography 3 (132). DOI: 10.4172/2157-7625.1000132.

GASKIN, JOHN F.; GHAREMANINEJAD, FARROKH; ZHANG, DAO-YUAN; LONDO, JASON P. (2004):

**A systematic overviewn of Frankeniaceae and Tamaricaceae from nuclear rDNA and Plastid Sequence Data.**

In: Annals of the Missouri Botanical Garden 91, p. 401–409.

GASKIN, JOHN F.; SCHAAL, BARBARA A. (2003):

**Molecular phylogenetic Investigation of U.S. Invasive *Tamarix*.**

In: Systematic Botany 28 (1), p. 86–95.

SUN, LIKUN; YANG, RUIQI; ZHANG, BAOGUI; ZHANG, GAOSEN; WU, XIUKUN; ZHANG, WEI ET AL. (2016):

**Phylogenetic Relationships among Species of *Tamarix* (Tamaricaceae) in China.**

In: Biochemical Systematics and Ecology 69, p. 213–221. DOI: 10.1016/j.bse.2016.10.003.

WANG, YONG; LIU, YIFEI; LIU, SONGBAI; HUANG, HONGWEN (2009):

**Molecular Phylogeny of *Myricaria* (Tamaricaceae): Implications for Taxonomy and Conservation in China.**

In: Botanical Studies 50, p. 343–352.

ZHANG, MING-LI; HAO, XIAO-LI; SANDERSON, STEWART C.; VYACHESLAV, BYALT V.; SUKHORUKOV, ALEXANDER P.; ZHANG, X. I.A. (2014):

**Spatiotemporal Evolution of *Reaumuria* (Tamaricaceae) in Central Asia: Insights from molecular Biogeography.**

In: Phytotaxa 167 (1), p. 89. DOI: 10.11646/phytotaxa.167.1.5.

## Taxaceae

CHENG, Y.; NICOLSON, R. G.; TRIPP, K.; CHAW, SHU-MIAW (2000):

**Phylogeny of Taxaceae and Cephalotaxaceae Genera inferred from Chloroplast matK Gene and nuclear rDNA ITS Region.**

In: Molecular Phylogenetics and Evolution 14 (3), p. 353–365. DOI: 10.1006/mpev.1999.0710.

COLLINS, DENNIS; MILL, ROBERT R.; MÖLLER, MICHAEL (2003):

**Species Separation of *Taxus baccata*, *T. canadensis*, and *T. cuspidata* (Taxaceae) and Origins of their reputed Hybrids inferred from Rapd and Cpdna Data.**

In: American Journal of Botany 90 (2), p. 175–182.

GHIMIRE, BALKRISHNA; HEO, KWEON (2014):

**Cladistic Analysis of Taxaceae s.l.**

In: Plant Systematics and Evolution 300 (2), p. 217–223. DOI: 10.1007/s00606-013-0874-y.

LI, JIAN-HUA; DAVIS, CHARLES C.; TREDICI, PETER DEL; DONOGHUE, MICHAEL J. (2001):

**Phylogeny and Biogeography of *Taxus* (Taxaceae) inferred from Sequences of the Internal Transcribed Spacer Region of nuclear ribosomal DNA.**

In: Harvard Papers in Botany 6 (1), p. 267–274.

## Tectariaceae

DING, HUI-HUI; CHAO, YI-SHAN; CALLADO, JOHN REY; DONG, SHI-YONG (2014):

**Phylogeny and Character Evolution of the Fern Genus *Tectaria* (Tectariaceae) in the Old World inferred from Chloroplast DNA Sequences.**

In: Molecular Phylogenetics and Evolution 80, p. 66–78. DOI: 10.1016/j.ympev.2014.06.004.

LIU, HONG-MEI; HE, LI-JUAN; SCHNEIDER, HARALD (2014):

**Towards the natural Classification of Tectarioid Ferns: Confirming the phylogenetic Relationships of *Pleocnemia* and *Pteridrys* (Eupolypods I).**

In: Journal of Systematics and Evolution 52 (2), p. 161–174. DOI: 10.1111/jse.12073.

ZHANG, LIANG; SCHUETTPELZ, ERIC; ROTHFELS, CARL J.; ZHOU, XIN-MAO; GAO, XIN-FEN; ZHANG, LI-BING (2016):

**Circumscription and Phylogeny of the Fern Family Tectariaceae based on Plastid and nuclear Markers, with the Description of two new Genera: *Draconopteris* and *Malaifilix* (Tectariaceae).**

In: Taxon 65 (4), p. 723–738. DOI: 10.12705/654.3.

ZHANG, LIANG; ZHOU, XIN-MAO; CHEN, DE-KUI; SCHUETTPELZ, ERIC; KNAPP, RALF; LU, NGAN THI ET AL. (2017):

**A global Phylogeny of the Fern Genus *Tectaria* (Tectariaceae: Polypodiales) based on Plastid and nuclear Markers Identifies major evolutionary Lineages and suggests repeated Evolution of free Venation from Anastomosing Venation.**

In: Molecular Phylogenetics and Evolution 114, p. 295–333. DOI: 10.1016/j.ympev.2017.05.020.

## Ternstroemiaceae

SU, YINGJUAN; LIAO, WEN-BO; WANG, TING; SUN, YUFEI; WEI, QIANG; CHANG, HUNGTÁ (2011):

**Phylogeny and evolutionary Divergence times in *Apterosperma* and *Euryodendron*: Evidence of a Tertiary Origin in South China.**

In: *Biochemical Systematics and Ecology* 39 (4-6), p. 769–777. DOI: 10.1016/j.bse.2011.07.004.

TSOU, CHI-HUA; LI, LU; VIJAYAN, KUNJUPILLAI (2016):

**The Intra-familial Relationships of Pentaphragmataceae s.l. as revealed by DNA Sequence Analysis.**

In: *Biochemical Genetics* 54 (3), p. 270–282. DOI: 10.1007/s10528-016-9717-1.

WU, CHI-CHIH; HSU, ZHI-FU; TSOU, CHI-HUA (2007):

**Phylogeny and Taxonomy of *Eurya* (Ternstroemiaceae) from Taiwan, as inferred from ITS Sequence Data.**

In: *Botanical Studies* 48, p. 97–116.

## Theaceae

HEO, KYEONG-IN; LEE, SANGTAE; LEE, CHUNGHEE; KIM, SEUNG-CHUL (2011):

**Generic Delimitation and infrageneric Classification of *Stewartia* and *Hartia* (Theaceae; Stewartieae): Insight from Pollen Morphology.**

In: *Plant Systematics and Evolution* 297 (1-2), p. 33–50. DOI: 10.1007/s00606-011-0497-0.

LI, MI-MI; LI, JIAN-HUA; DEL TREDICI, PETER; CORAJOD, JEFFREY; FU, CHENG-XIN (2013):

**Phylogenetics and Biogeography of Theaceae based on Sequences of Plastid Genes.**

In: *Journal of Systematics and Evolution* 51 (4), p. 396–404. DOI: 10.1111/jse.12017.

LI, RONG; YANG, JUN-BO; YANG, SHI-XIONG; LI, DE-ZHU (2011):

**Phylogeny and Taxonomy of the *Pyrenaria* complex (Theaceae) based on nuclear ribosomal ITS Sequences.**

In: *Nordic Journal of Botany* 29 (6), p. 780–787. DOI: 10.1111/j.1756-1051.2011.01175.x.

LUNA, ISOLDA; OCHOTERENA, HELGA (2004):

**Phylogenetic Relationships of the Genera of Theaceae based on Morphology.**

In: *Cladistics* 20 (3), p. 223–270. DOI: 10.1111/j.1096-0031.2004.00024.x.

PRINCE, LINDA M.; PARKS, CLIFFORD R. (2001):

**Phylogenetic Relationships of Theaceae inferred from Chloroplast DNA Sequence Data.**

In: *American Journal of Botany* 88 (12), p. 2309–2320. DOI: 10.2307/3558391.

VIJAYAN, KUNJUPILLAI; ZHANG, WEN-JU; TSOU, CHI-HUA (2009):

**Molecular Taxonomy of *Camellia* (Theaceae) inferred from nrITS Sequences.**

In: *American Journal of Botany* 96 (7), p. 1348–1360. DOI: 10.3732/ajb.0800205.

WANG, Y. H.; HE, H.; MIN, T. L.; ZHOU, L. H.; FRITSCH, PETER W. (2006):

**The phylogenetic Position of *Apterosperma* (Theaceae) based on morphological and karyotype Characters.**

In: *Plant Systematics and Evolution* 260 (1), p. 39–52. DOI: 10.1007/s00606-006-0426-9.

YANG, S.-X.; YANG, J.-B.; LEI, LI-GONG; LI, D.-Z.; YOSHINO, H.; IKEDA, T. (2004):

**Reassessing the Relationships between *Gordonia* and *Polyspora* (Theaceae) based on the combined Analyses of molecular Data from the nuclear, plastid and mitochondrial Genomes.**

In: *Plant Systematics and Evolution* 248 (1-4), p. 45–55. DOI: 10.1007/s00606-004-0178-3.



YU, XIANG-QIN; DREW, BRYAN T.; YANG, JUN-BO; GAO, LIAN-MING; LI, DE-ZHU (2017):

**Comparative Chloroplast Genomes of eleven *Schima* (Theaceae) species: Insights into DNA barcoding and Phylogeny.**

In: Public Library of Science One 12 (6), e0178026. DOI: 10.1371/journal.pone.0178026.

## **Thecophilaeeae**

BRUMMITT, R.K.; BANKS, HANNAH I.; JOHNSON, MARGARET A.T.; DOCHERTY, KATHERINE A.; JONES, KEITH; CHASE, MARK W.; RUDALL, PAULA J. (1998):

**Taxonomy of Cyanastroideae (Tecophilaeeae): a multidisciplinary Approach.**

In: Kew Bulletin 53 (4), p. 769–803.

MANNING, JOHN C.; FOREST, FÉLIX; MANNHEIMER, C. A. (2005):

***Eremiolirion*, a new Genus of southern African Tecophilaeeae, and taxonomic Notes on *Cyanella alba*.**

In: Bothalia 35 (2), p. 115–120. DOI: 10.4102/abc.v35i2.386.

MANNING, JOHN C.; GOLDBLATT, PETER (2012):

**A Revision of Tecophilaeeae Subfam. Tecophilaeeoideae in Africa.**

In: Bothalia 42 (1), p. 21–41. DOI: 10.4102/abc.v42i1.6.

## **Thelypteridaceae**

ALMEIDA, THAÍS ELIAS; HENNEQUIN, SABINE; SCHNEIDER, HARALD; SMITH, ALAN R.; BATISTA, JOÃO AGUIAR NOGUEIRA; RAMALHO, ALINE JOSEPH ET AL. (2016):

**Towards a phylogenetic generic Classification of Thelypteridaceae: Additional Sampling suggests alterations of Neotropical Taxa and further Study of paleotropical Genera.**

In: Molecular Phylogenetics and Evolution 94 (Pt B), p. 688–700. DOI: 10.1016/j.ympev.2015.09.009.

FERNANDES, ROZIJANE SANTOS; YESILYURT, JOVITA CISLINSKI; SALINO, ALEXANDRE (2014):

**New Species and Combinations in *Meniscium* (Thelypteridaceae).**

In: Phytotaxa 184 (1), p. 1. DOI: 10.11646/phytotaxa.184.1.1.

HE, LI-JUAN; ZHANG, XIAN-CHUN (2012):

**Exploring generic Delimitation within the Fern Family Thelypteridaceae.**

In: Molecular Phylogenetics and Evolution 65 (2), p. 757–764. DOI: 10.1016/j.ympev.2012.07.021.

LI, ZHONG-YANG; HE, ZHAO-RONG; ZHANG, XIAN-CHUN (2013):

**A taxonomic Revision of *Cyclosorus* Subgenus *Cyclosoriopsis* (Thelypteridaceae) from China.**

In: Journal of Systematics and Evolution 51 (5), p. 609–638. DOI: 10.1111/jse.12013.

SMITH, ALAN R.; CRANFILL, RAYMOND B. (2002):

**Intrafamilial Relationships of the Thelypteroid Ferns (Thelypteridaceae).**

In: American Fern Journal 92 (2), p. 131. DOI: 10.1640/0002-8444(2002)092[0131:IROTF]2.0.CO;2.

WANG, REN-XIANG; SHAO, WEN; LIU, LING; LIU, JING; DENG, XI-CHAO; LU, SHU-GANG (2015):

**A Systematic Study of the Fern Genus *Mesopteris* Ching (Thelypteridaceae).**

In: American Fern Journal 105 (1), p. 11–19. DOI: 10.1640/0002-8444-105.1.11.

## **Themidaceae**

PIRES, J. CHRIS; FAY, MICHAEL F.; DAVIS, WARREN S.; HUFFORD, LARRY; ROVA, JOHAN H.E.; CHASE, MARK W.; SYTSMA, KENNETH J. (2001):

**Molecular and morphological phylogenetic Analyses of Themidaceae (Asparagales).**

In: Kew Bulletin 56, p. 601–626.

PIRES, J. CHRIS; SYTSMA, KENNETH J. (2002):

**A phylogenetic Evaluation of a biosystematic Framework: *Brodiaea* and related petaloid Monocots (Themidaceae).**

In: American Journal of Botany 89 (8), p. 1342–1359. DOI: 10.3732/ajb.89.8.1342.

## Theophrastaceae

KÄLLERSJÖ, MARI; STÄHL, BERTIL (2003):

**Phylogeny of Theophrastaceae (Ericales s. lat.).**

In: International Journal of Plant Sciences 164 (4), p. 579–591.

STÄHL, BERTIL; KÄLLERSJÖ, MARI (2004):

**Reinstatement of *Bonellia* (Theophrastaceae).**

In: Novon: A Journal for Botanical Nomenclature 14 (1), p. 115–118.

## Thesiaceae

MOORE, TIMOTHY E.; VERBOOM, GEORGE ANTHONY; FOREST, FÉLIX (2010):

**Phylogenetics and Biogeography of the parasitic Genus *Thesium* L. (Santalaceae), with an Emphasis on the Cape of South Africa.**

In: Botanical Journal of the Linnean Society 162, p. 435–454.

NICKRENT, DANIEL LEE; GARCÍA, MIGUEL ANGEL (2015):

***Lacomucinaea*, a new monotypic Genus in Thesiaceae (Santalales).**

In: Phytotaxa 224 (2), p. 173. DOI: 10.11646/phytotaxa.224.2.4.

## Thismiaceae

MERCKX, VINCENT S.F.T.; BAKKER, FREEK T.; HUYSMANS, SUZY; SMETS, ERIK (2009):

**Bias and conflict in phylogenetic Inference of myco-heterotrophic Plants: a case Study in Thismiaceae.**

In: Cladistics 25 (1), p. 64–77. DOI: 10.1111/j.1096-0031.2008.00241.x.

YAHARA, TETSUKAZU; TSUKAYA, HIROKAZU (2008):

***Oxygyne yamashitae*, a new Species of Thismiaceae from Yaku Island, Japan.**

In: Acta Phytotaxonomica Geobotanica 59 (2), p. 97–104.

## Thomandersiaceae

WORTLEY, ALEXANDRA H.; HARRIS, DAVID J.; SCOTLAND, ROBERT W. (2007):

**On the Taxonomy and phylogenetic Position of *Thomandersia*.**

In: Systematic Botany 32 (2), p. 415–444.

## Thymelaeaceae

BEAUMONT, ANGELA J.; EDWARDS, TREVOR J.; MANNING, JOHN C.; MAURIN, OLIVIER; RAUTENBACH, MARLINE; MOTSI, MOLEBOHENG C. ET AL. (2009):

***Gnidia* (Thymelaeaceae) is not monophyletic: taxonomic Implications for Thymelaeoideae and a partial new generic Taxonomy for *Gnidia*.**

In: Botanical Journal of the Linnean Society 160 (4), p. 402–417. DOI: 10.1111/j.1095-8339.2009.00988.x.

BREDENKAMP, C. L.; VAN WYK, ABRAHAM E. (2003):

**Taxonomy of the Genus *Passerina* (Thymelaeaceae).**

In: Bothalia 33 (1), p. 59–98. DOI: 10.4102/abc.v33i1.433.

EURLINGS, MARCEL C.M.; GRAVENDEEL, BARBARA (2005):

**TrnL-trnF Sequence Data imply Paraphyly of *Aquilaria* and *Gyrinops* (Thymelaeaceae) and provide new Perspectives for Agarwood Identification.**

In: Plant Systematics and Evolution 254 (1-2), p. 1–12. DOI: 10.1007/s00606-005-0312-x.

FLODEN, AARON J.; MAYFIELD, MARK H.; FERGUSON, CAROLYN J. (2009):

**A new narrowly endemic Species of *Dirca* (Thymelaeaceae) from Kansas and Arkansas, with a phylogenetic Overview and taxonomic Synopsis of the Genus.**

In: Journal of the Botanical Research Institute of Texas 3 (2), p. 485–499.

FOSTER, CHARLES S.P.; CANTRILL, DAVID J.; JAMES, ELIZABETH A.; SYME, ANNA E.; JORDAN, REBECCA; DOUGLAS, RACHEL ET AL. (2016):

**Molecular Phylogenetics provides new Insights into the Systematics of *Pimelea* and *Thecanthes* (Thymelaeaceae).**

In: Australian Systematic Botany 29 (3), p. 185–196. DOI: 10.1071/SB16013.

GALICIA-HERBADA, D. (2006):

**Origin and Diversification of *Thymelaea* (Thymelaeaceae): Inferences from a phylogenetic Study based on ITS (rDNA) Sequences.**

In: Plant Systematics and Evolution 257 (3-4), p. 159–187. DOI: 10.1007/s00606-005-0371-z.

ROGERS, ZACHARY P. (2009):

**A Revision of Malagasy *Gnidia* (Thymelaeaceae, Thymelaeoideae).**

In: Annals of the Missouri Botanical Garden 96 (2), p. 324–369. DOI: 10.3417/2006114.

ROGERS, ZACHARY P. (2010):

**Nomenclatural Notes on American Thymelaeaceae.**

In: Novon: A Journal for Botanical Nomenclature 20 (4), p. 448–462. DOI: 10.3417/2009069.

VAN DER BANK, MICHELLE; FAY, MICHAEL F.; CHASE, MARK W. (2002):

**Molecular Phylogenetics of Thymelaeaceae with particular Reference to African and Australian Genera.**

In: Taxon 51, p. 329–339.

ZHANG, YONG-HONG; VOLIS, SERGEI; SUN, HANG (2010):

**Chloroplast Phylogeny and Phylogeography of *Stellera chamaejasme* on the Qinghai-Tibet Plateau and in adjacent Regions.**

In: Molecular Phylogenetics and Evolution 57 (3), p. 1162–1172. DOI: 10.1016/j.ympev.2010.08.033.

## Tiliaceae

CAI, JIE; MA, PENG-FEI; LI, HONG-TAO; LI, DE-ZHU (2015):

**Complete Plastid Genome Sequencing of four *Tilia* Species (Malvaceae): A comparative Analysis and phylogenetic Implications.**

In: Public Library of Science One 10 (11), e0142705. DOI: 10.1371/journal.pone.0142705.

YOUSEFZADEH, HAMED; HOSSEINZADEH COLAGAR, ABASALT; TABARI, MASOUD; SATTARIAN, ALI; ASSADI, MOSTAFA (2012):

**Utility of ITS Region Sequence and Structure for molecular Identification of *Tilia* Species from Hyrcanian forests, Iran.**

In: Plant Systematics and Evolution 298 (5), p. 947–961. DOI: 10.1007/s00606-012-0604-x.

## Tofieldiaceae

AZUMA, HIROSHI; TOBE, HIROSHI (2011):

**Molecular phylogenetic Analyses of Tofieldiaceae (Alismatales): Family Circumscription and intergeneric Relationships.**

In: Journal of Plant Research 124 (3), p. 349–357. DOI: 10.1007/s10265-010-0387-5.

CAMPBELL, LISA M.; DORR, LAURENCE J. (2013):

**A Synopsis of *Harperocallis* (Tofieldiaceae, Alismatales) with ten new Combinations.**

In: *PhytoKeys* (21), p. 37–52. DOI: 10.3897/phytokeys.21.4859.

REMIZOWA, MARGARITA V.; SOKOLOFF, DMITRY D.; CAMPBELL, LISA M.; STEVENSON, DENNIS WM.; RUDALL, PAULA J. (2011):

***Harperocallis* is congeneric with *Isidrogalvia* (Tofieldiaceae, Alismatales): Evidence from comparative Floral Morphology.**

In: *Taxon* 60 (4), p. 1076–1094.

TAMURA, MINORU N.; AZUMA, HIROSHI; YAMASHITA, JUN; FUSE, SHIZUKA; ISHII, TAKAAKI (2010):

**Biosystematic studies on the Family Tofieldiaceae II. Phylogeny of Species of *Tofieldia* and *Triantha* inferred from Plastid and Nuclear DNA Sequences.**

In: *Acta Phytotaxonomica Geobotanica* 60 (3), p. 131–140.

TAMURA, MINORU N.; FUSE, SHIZUKA; AZUMA, H.; HASEBE, M. (2004):

**Biosystematic Studies on the Family Tofieldiaceae I. Phylogeny and Circumscription of the Family inferred from DNA Sequences of *matK* and *rbcl*.**

In: *Plant Biology* 6 (5), p. 562–567. DOI: 10.1055/s-2004-821278.

TAMURA, MINORU N.; FUSE, SHIZUKA; LEE, NAM SOOK; KIM, JIN OHK; YAMASHITA, JUN; ISHII, TAKAAKI (2011):

**Biosystematic studies on the Family Tofieldiaceae III. Classification of *Tofieldia nuda* into three Species and three Varieties.**

In: *Taxon* 60 (5), p. 1339–1348.

## Tracheophyta

CANTINO, PHILIP D.; DOYLE, JAMES A.; GRAHAM, SEAN W.; JUDD, WALTER S.; OLMSTEAD, RICHARD G.; SOLTIS, DOUGLAS E. ET AL. (2007):

**Towards a phylogenetic Nomenclature of Tracheophyta.**

In: *Taxon* 56 (3), p. 1–44.

## Triuridaceae

MENNES, CONSTANTIJN B.; SMETS, ERIK F.; MOSES, SAINGE N.; MERCKX, VINCENT S.F.T. (2013):

**New Insights in the long-debated evolutionary History of Triuridaceae (Pandanales).**

In: *Molecular Phylogenetics and Evolution* 69 (3), p. 994–1004. DOI: 10.1016/j.ympev.2013.05.031.

## Trochodendraceae

REN, YI; CHEN, L.; TIAN, X. H.; ZHANG, X. H.; LU, A. M. (2007):

**Discovery of Vessels in *Tetracentron* (Trochodendraceae) and its systematic Significance.**

In: *Plant Systematics and Evolution* 267 (1–4), p. 155–161. DOI: 10.1007/s00606-007-0563-9.

## Tropaeolaceae

ANDERSSON, LENNART; ANDERSSON, STEPHAN (2000):

**A molecular Phylogeny of Tropaeolaceae and its Systematic Implications.**

In: *Taxon* 49 (2), p. 721–736.

HERSHKOVITZ, MARK A.; HERNÁNDEZ-PELLICER, C. C.; ARROYO, MARY T.K. (2006):

**Ribosomal DNA Evidence for the Diversification of *Tropaeolum* Sect. *Chilensia* (Tropaeolaceae).**

In: *Plant Systematics and Evolution* 260 (1), p. 1–24. DOI: 10.1007/s00606-006-0428-7.

## Turneraceae

ARBO, MARÍA M.; GONZALEZ, ANA M.; SEDE, SILVANA M. (2015):

**Phylogenetic Relationships within Turneraceae based on morphological Characters with Emphasis on Seed micromorphology.**

In: *Plant Systematics and Evolution* 301 (7), p. 1907–1926. DOI: 10.1007/s00606-015-1204-3.

LÓPEZ, ALICIA; FERNÁNDEZ, AVELIANO; SHORE, JOEL P. (2013):

**Inferences on the Origins of polyploid *Turnera* Species (Passifloraceae) based on molecular Data.**

In: *Botany* 91 (3), p. 167–175. DOI: 10.1139/cjb-2012-0135.

MERCEDES ARBO, MARIA; ESPERT, SHIRLEY M. (2009):

**Morphology, Phylogeny and Biogeography of *Turnera* L. (Turneraceae).**

In: *Taxon* 58 (2), p. 457–467. DOI: 10.1002/tax.582011.

THULIN, MATS; RAZAFIMANDIMBISON, SYLVAIN G.; CHAFE, PAUL; HEIDARI, NAHID; KOOL, ANNELEEN; SHORE, JOEL P. (2012):

**Phylogeny of the Turneraceae Clade (Passifloraceae s.l.): Trans-Atlantic Disjunctions and two new Genera in Africa.**

In: *Taxon* 61 (2), p. 308–323. DOI: 10.1002/tax.612003.

TRUYENS, SIMON; ARBO, MARÍA M.; SHORE, JOEL P. (2005):

**Phylogenetic Relationships, Chromosome and breeding System Evolution in *Turnera* (Turneraceae): Inferences from its Sequence Data.**

In: *American Journal of Botany* 92 (10), p. 1749–1758. DOI: 10.3732/ajb.92.10.1749.

## Typhaceae

ITO, YU; TANAKA, NORIO; KIM, CHANGKYUN; KAUL, ROBERT B.; ALBACH, DIRK C. (2016):

**Phylogeny of *Sparganium* (Typhaceae) revisited: non-monophyletic Nature of *S. emersum* sensu lato and Resurrection of *S. acaule*.**

In: *Plant Systematics and Evolution* 302 (1), p. 129–135. DOI: 10.1007/s00606-015-1245-7.

KIM, CHANGKYUN; CHOI, HONG-KEUN (2011):

**Molecular Systematics and Character Evolution of *Typha* (Typhaceae) inferred from nuclear and Plastid DNA Sequence Data.**

In: *Taxon* 60 (5), p. 1417–1428.

SULMAN, JOSHUA D.; DREW, BRYAN T.; DRUMMOND, CHLOE; HAYASAKA, EISUKE; SYTSMA, KENNETH J. (2013):

**Systematics, Biogeography, and Character Evolution of *Sparganium* (Typhaceae): Diversification of a widespread, aquatic Lineage.**

In: *American Journal of Botany* 100 (10), p. 2023–2039. DOI: 10.3732/ajb.1300048.

## Ulmaceae

DENK, THOMAS; GRIMM, GUIDO W. (2005):

**Phylogeny and Biogeography of *Zelkova* (Ulmaceae sensu stricto) as inferred from Leaf Morphology, ITS Sequence Data and the fossil Record.**

In: *Botanical Journal of the Linnean Society* 147, p. 129–157.

## Urticaceae

GROSSE-VELDMANN, BERNADETTE; NÜRK, NICOLAI M.; SMISSEN, ROB D.O.B.; BREITWIESER, ILSE; QUANDT, DIETMAR; WEIGEND, MAXIMILIAN (2016):

**Pulling the sting out of Nettle Systematics - A comprehensive Phylogeny of the Genus *Urtica* L. (Urticaceae).**

In: *Molecular Phylogenetics and Evolution* 102, p. 9–19. DOI: 10.1016/j.ympev.2016.05.019.

GROSSE-VELDMANN, BERNADETTE; WEIGEND, MAXIMILIAN (2018):

**The geometry of gender: Hyper-Diversification of sexual systems in *Urtica L.* (Urticaceae).**

In: *Cladistics* 34 (2), p. 131–150. DOI: 10.1111/cla.12193.

**GUTIÉRREZ-VALENCIA, JUANITA; CHOMICKI, GUILLAUME; RENNER, SUSANNE P. (2017):**

**Recurrent Breakdowns of Mutualisms with Ants in the Neotropical Ant-plant Genus *Cecropia* (Urticaceae).**

In: *Molecular Phylogenetics and Evolution* 111, p. 196–205. DOI: 10.1016/j.ympev.2017.04.009.

**HADIAH, JULIASI T.; CONN, BARRY J.; QUINN, CHRISTOPHER J. (2008):**

**Infra-familial Phylogeny of Urticaceae, using Chloroplast Sequence Data.**

In: *Australian Systematic Botany* 21 (5), p. 375–385. DOI: 10.1071/SB08041.

**HADIAH, JULIASI T.; QUINN, CHRISTOPHER J.; CONN, BARRY J. (2003):**

**Phylogeny of *Elatostema* (Urticaceae) using Chloroplast DNA Data.**

In: *Telopea* 10 (1), p. 235–246.

**JESTROW, BRETT; VALDÉS, JAMES J.; RODRÍGUEZ, FRANCISCO JIMÉNEZ; FRANCISCO-ORTEGA, JAVIER (2012):**

**Phylogenetic Placement of the Dominican Republic endemic Genus *Sarcopilea* (Urticaceae).**

In: *Taxon* 61 (3), p. 592–600.

**KIM, CHANGKYUN; DENG, TAO; CHASE, MARK W.; ZHANG, DAI-GUI; NIE, ZE-LONG; SUN, HANG (2015):**

**Generic Phylogeny and Character Evolution in Urticeae (Urticaceae) inferred from nuclear and Plastid DNA Regions.**

In: *Taxon* 64 (1), p. 65–78. DOI: 10.12705/641.20.

**MONRO, ALEX K. (2006):**

**The Revision of Species-rich Genera: A phylogenetic Framework for the Strategic Revision of *Pilea* (Urticaceae) based on cpDNA, nrDNA, and Morphology.**

In: *American Journal of Botany* 93 (3), p. 426–441.

**TREIBER, ERIN L.; GAGLIOTI, ANDRÉ LUIZ; ROMANIUC-NETO, SERGIO; MADRIÑÁN, SANTIAGO; WEIBLEN, GEORGE D. (2016):**

**Phylogeny of the Cecropieae (Urticaceae) and the Evolution of an Ant-Plant Mutualism.**

In: *Systematic Botany* 41 (1), p. 56–66. DOI: 10.1600/036364416X690633.

**WU, ZENG-YUAN; MONRO, ALEX K.; MILNE, RICHARD IAN; WANG, HONG; YI, TING-SHUANG; LIU, JIE; LI, DE-ZHU (2013):**

**Molecular Phylogeny of the nettle Family (Urticaceae) inferred from multiple Loci of three Genomes and extensive generic Sampling.**

In: *Molecular Phylogenetics and Evolution* 69 (3), p. 814–827. DOI: 10.1016/j.ympev.2013.06.022.

## **Valerianaceae**

**BELL, C. (2005):**

**Phylogeny and Biogeography of Valerianaceae (Dipsacales) with special Reference to the South American Valerians.**

In: *Organisms Diversity and Evolution* 5 (2), p. 147–159. DOI: 10.1016/j.ode.2004.10.014.

**BELL, CHARLES D. (2004):**

**Preliminary Phylogeny of Valerianaceae (Dipsacales) inferred from nuclear and Chloroplast DNA Sequence Data.**

In: *Molecular Phylogenetics and Evolution* 31 (1), p. 340–350. DOI: 10.1016/j.ympev.2003.07.006.

BELL, CHARLES D. (2007):

**Phylogenetic Placement and Biogeography of the North American Species of *Valerianella* (Valerianaceae: Dipsacales) based on Chloroplast and nuclear DNA.**

In: *Molecular Phylogenetics and Evolution* 44 (3), p. 929–941. DOI: 10.1016/j.ympev.2007.03.013.

BELL, CHARLES D.; GONZALEZ, LAUREN A. (2018):

**Exploring the utility of "Next-generation" Sequence Data on Inferring the Phylogeny of the South American *Valeriana* (Valerianaceae).**

In: *Molecular Phylogenetics and Evolution* 123, p. 44–49. DOI: 10.1016/j.ympev.2018.02.014.

BELL, CHARLES D.; KUTSCHKER, ADRIANA; ARROYO, MARY T.K. (2012):

**Phylogeny and Diversification of Valerianaceae (Dipsacales) in the Southern Andes.**

In: *Molecular Phylogenetics and Evolution* 63 (3), p. 724–737. DOI: 10.1016/j.ympev.2012.02.015.

HIDALGO, ORIANE; GARNATJE, TERESA; SUSANNA, ALFONSO; MATHEZ, JOEL (2004):

**Phylogeny of Valerianaceae based on matK and ITS Markers, with Reference to matK individual Polymorphism.**

In: *Annals of Botany* 93 (3), p. 283–293. DOI: 10.1093/aob/mch042.

JACOBS, BART; BELL, CHARLES D.; SMETS, ERIK (2010):

**Fruits and Seeds of the *Valeriana* Clade (Dipsacales): Diversity and Evolution.**

In: *International Journal of Plant Sciences* 171 (4), p. 421–434. DOI: 10.1086/651243.

PYCK, NANCY; VAN LYSEBETTEN, A.; STESENS, J.; SMETS, ERIK (2002):

**The Phylogeny of Patrinieae sensu Graebner (Valerianaceae) revisited: additional Evidence from ndh F Sequence Data.**

In: *Plant Systematics and Evolution* 233 (1-2), p. 29–46. DOI: 10.1007/s006060200053.

## Velloziaceae

BEHNKE, H.-DIETMAR; HUMMEL, ERIC; HILLMER, STEFAN; SAUER-GÜRTH, HEDWIG; GONZALEZ, JAVIER; WINK, MICHAEL (2013):

**A Revision of African Velloziaceae based on Leaf Anatomy Characters and rbcL Nucleotide Sequences.**

In: *Botanical Journal of the Linnean Society* 172 (1), p. 22–94. DOI: 10.1111/boj.12018.

MELLO-SILVA, RENATO (2005):

**Morphological Analysis, Phylogenies and Classification in Velloziaceae.**

In: *Botanical Journal of the Linnean Society* 148 (2), p. 157–173. DOI: 10.1111/j.1095-8339.2005.00399.x.

MELLO-SILVA, RENATO; MONTSERRAT, LAURA (2015):

**Depicting *Barbacenia flava* and *Vellozia intermedia* with a short History of illustrated Velloziaceae.**

In: *Kew Bulletin* 70 (2), p. 22. DOI: 10.1007/S12225-015-9575-8.

MENEZES, NANUZA L.; MELLO-SILVA, RENATO; MAYO, SIMON J. (1993):

**A Cladistic Analysis of the Velloziaceae.**

In: *Kew Bulletin* 49 (1), p. 71–92. DOI: 10.2307/4110200.

## Verbenaceae

LU-IRVING, PATRICIA; O'LEARY, NATALY; O'BRIEN, ANNA; OLMSTEAD, RICHARD G. (2014):

**Resolving the Genera *Aloysia* and *Acantholippia* within Tribe Lantaneae (Verbenaceae), using Chloroplast and Nuclear Sequences.**

In: *Systematic Botany* 39 (2), p. 644–655. DOI: 10.1600/036364414X680816.

LU-IRVING, PATRICIA; OLMSTEAD, RICHARD G. (2013):

**Investigating the Evolution of Lantaneae (Verbenaceae) using multiple Loci.**

In: Botanical Journal of the Linnean Society 171, p. 103–119.

**MARX, HANNAH E.; O'LEARY, NATALY; YUAN, YAO-WU; LU-IRVING, PATRICIA; TANK, DAVID C.; MÚLGURA, MARÍA EMA; OLMSTEAD, RICHARD G. (2010):**

**A molecular Phylogeny and Classification of Verbenaceae.**

In: American Journal of Botany 97 (10), p. 1647–1663. DOI: 10.3732/ajb.1000144.

**NESOM, GUY L. (2010):**

**Infrageneric Classification of *Verbena* (Verbenaceae).**

In: Phytoneuron 11, p. 1–15.

**O'LEARY, NATALY; CALVIÑO, CAROLINA ISABEL; MARTÍNEZ, SUSANA G.; LU-IRVING, PATRICIA; OLMSTEAD, RICHARD G.; MÚLGURA, MARÍA EMA (2012):**

**Evolution of morphological Traits in Verbenaceae.**

In: American Journal of Botany 99 (11), p. 1778–1792. DOI: 10.3732/ajb.1200123.

**O'LEARY, NATALY; YUAN, YAO-WU; CHEMISQUY, MARIA AMELIA; OLMSTEAD, RICHARD G. (2009):**

**Reassignment of Species of paraphyletic *Junellia* s.l. to the new Genus *Mulguraea* (Verbenaceae) and new Circumscription of Genus *Junellia* : molecular and morphological Congruence.**

In: Systematic Botany 34 (4), p. 777–786. DOI: 10.1600/036364409790139691.

**PERALTA, PAOLA; MÚLGURA DE ROMERO, MARÍA E.; DENHAM, SILVIA S.; BOTTA, SILVIA M. (2008):**

**Revisión del Género *Junellia* (Verbenaceae).**

In: Annals of the Missouri Botanical Garden 95 (2), p. 338–390. DOI: 10.3417/2004167.

**YUAN, YAO-WU; LIU, CHANG; MARX, HANNAH E.; OLMSTEAD, RICHARD G. (2010):**

**An empirical Demonstration of using Pentatricopeptide Repeat (PPR) Genes as plant phylogenetic tools: Phylogeny of Verbenaceae and the *Verbena*-complex.**

In: Molecular Phylogenetics and Evolution 54 (1), p. 23–35. DOI: 10.1016/j.ympev.2009.08.029.

**YUAN, YAO-WU; OLMSTEAD, RICHARD G. (2008):**

**A species-level phylogenetic Study of the *Verbena* complex (Verbenaceae) indicates two independent intergeneric Chloroplast Transfers.**

In: Molecular Phylogenetics and Evolution 48 (1), p. 23–33. DOI: 10.1016/j.ympev.2008.04.004.

**YUAN, YAO-WU; OLMSTEAD, RICHARD G. (2008):**

**Evolution and phylogenetic utility of the Phot Gene duplicates in the *Verbena* complex (Verbenaceae): dramatic Intron size Variation and Footprint of ancestral Recombination.**

In: American Journal of Botany 95 (9), p. 1166–1176. DOI: 10.3732/ajb.0800133.

## **Viburnaceae**

**CHATELET, DAVID S.; CLEMENT, WENDY L.; SACK, LAWREN; DONOGHUE, MICHAEL J.; EDWARDS, ERIKA J. (2013):**

**The Evolution of Photosynthetic Anatomy in *Viburnum* (Adoxaceae).**

In: International Journal of Plant Sciences 174 (9), p. 1277–1291. DOI: 10.1086/673241.

**CLEMENT, WENDY L.; ARAKAKI, MÓNICA; SWEENEY, PATRICK W.; EDWARDS, ERIKA J.; DONOGHUE, MICHAEL J. (2014):**

**A Chloroplast Tree for *Viburnum* (Adoxaceae) and its Implications for phylogenetic Classification and Character Evolution.**

In: American Journal of Botany 101 (6), p. 1029–1049. DOI: 10.3732/ajb.1400015.

**CLEMENT, WENDY L.; DONOGHUE, MICHAEL J. (2011):**



**Dissolution of *Viburnum* Section *Megalotinus* (Adoxaceae) of Southeast Asia and its Implications for morphological Evolution and Biogeography.**

In: International Journal of Plant Sciences 172 (4), p. 559–573. DOI: 10.1086/658927.

CLEMENT, WENDY L.; DONOGHUE, MICHAEL J. (2012):

**Barcoding Success as a function of phylogenetic Relatedness in *Viburnum*, a Clade of woody Angiosperms.**

In: BMC Evolutionary Biology 12, p. 73. DOI: 10.1186/1471-2148-12-73.

SPRIGGS, ELIZABETH L.; CLEMENT, WENDY L.; SWEENEY, PATRICK W.; MADRIÑÁN, SANTIAGO; EDWARDS, ERIKA J.; DONOGHUE, MICHAEL J. (2015):

**Temperate Radiations and dying embers of a tropical past: the Diversification of *Viburnum*.**

In: the new Phytologist 207 (2), p. 340–354. DOI: 10.1111/nph.13305.

WINKWORTH, RICHARD C.; DONOGHUE, MICHAEL J. (2004):

***Viburnum* Phylogeny: Evidence from the duplicated nuclear Gene GBSSI.**

In: Molecular Phylogenetics and Evolution 33 (1), p. 109–126. DOI: 10.1016/j.ympev.2004.05.006.

WINKWORTH, RICHARD C.; DONOGHUE, MICHAEL J. (2005):

***Viburnum* Phylogeny based on combined molecular Data: Implications for Taxonomy and Biogeography.**

In: American Journal of Botany 92 (4), p. 653–666. DOI: 10.3732/ajb.92.4.653.

## Violaceae

BALLARD, HARVEY EUGENE; SYTSMA, KENNETH J. (2000):

**Evolution and Biogeography of the Woody Hawaiian Violets (*Viola*, Violaceae): Arctic Origins, herbaceous Ancestry and Bird Dispersal.**

In: Evolution 54 (5), p. 1521–1532. DOI: 10.1554/0014-3820(2000)054[1521:EABOTW]2.0.CO;2.

CONESA, M. À.; MUS, M.; ROSSELLÓ, J. A. (2008):

**Hybridization between insular endemic and widespread Species of *Viola* in non-disturbed Environments assessed by nuclear ribosomal and cpDNA Sequences.**

In: Plant Systematics and Evolution 273 (3-4), p. 169–177. DOI: 10.1007/s00606-008-0006-2.

HAVRAN, J. CHRISTOPHER; SYTSMA, KENNETH J.; BALLARD, HARVEY EUGENE (2009):

**Evolutionary Relationships, inter-Island Biogeography, and molecular Evolution in the Hawaiian violets (*Viola*: Violaceae).**

In: American Journal of Botany 96 (11), p. 2087–2099. DOI: 10.3732/ajb.0900021.

LIANGGUAN-XIN; XINGFU-WU (2010):

**Infrageneric Phylogeny of the Genus *Viola* (Violaceae) based on trnL trnF, psbA-trnH, rpl16, ITS Sequences, cytological and morphological Data.**

In: Acta Botanica Yunnanica 32 (6), p. 477–488.

MARCUSSEN, THOMAS; HEIER, LISE; BRYSTING, ANNE K.; OXELMAN, BENGT; JAKOBSEN, KJETILL P. (2015):

**From Gene Trees to a dated allopolyploid Network: Insights from the Angiosperm Genus *Viola* (Violaceae).**

In: Systematic Biology 64 (1), p. 84–101. DOI: 10.1093/sysbio/syu071.

MARCUSSEN, THOMAS; JAKOBSEN, KJETILL S.; DANIHELKA, JIRÍ; BALLARD, HARVEY EUGENE; BLAXLAND, KIM; BRYSTING, ANNE K.; OXELMAN, BENGT (2012):

**Inferring Species Networks from Gene Trees in high-polyploid North American and Hawaiian Violets (*Viola*, Violaceae).**

In: *Systematic Biology* 61 (1), p. 107–126. DOI: 10.1093/sysbio/syr096.

**MARCUSSEN, THOMAS; OXELMAN, BENGT; SKOG, ANNA; JAKOBSEN, KJETILL P. (2010):  
Evolution of plant RNA Polymerase IV/V genes: Evidence of Subneofunctionalization  
of duplicated NRPD2/NRPE2-like paralogs in *Viola* (Violaceae).**

In: *BMC Evolutionary Biology* 10, p. 45. DOI: 10.1186/1471-2148-10-45.

**MITCHELL, ANTHONY D.; HEENAN, PETER B.; MURRAY, B. G.; MOLLOY, B. P. J.; LANGE, PETER J. (2009):  
Evolution of the south-western Pacific Genus *Melicytus* (Violaceae): Evidence from  
DNA Sequence Data, Cytology and Sex Expression.**

In: *Australian Systematic Botany* 22 (3), p. 143–157. DOI: 10.1071/SB08042.

**NAKAMURA, KOH; DENDA, TETSUO; KOKUBUGATA, GORO; HUANG, CHIUN-JR; PENG, CHING-I.; YOKOTA, MASATSUGU  
(2015):**

**Phylogeny and Biogeography of the *Viola iwagawae-tashiroi* Species complex  
(Violaceae, Section *Plagiostigma*) endemic to the Ryukyu Archipelago, Japan.**

In: *Plant Systematics and Evolution* 301 (1), p. 337–351. DOI: 10.1007/s00606-014-1076-y.

**PAULA-SOUSA, JULIANA; BALLARD, HARVEY EUGENE (2014):**

**Re-establishment of the name *Pombalia*, and new Combinations from the  
polyphyletic *Hybanthus* (Violaceae).**

In: *Phytotaxa* 183 (1), p. 1. DOI: 10.11646/phytotaxa.183.1.1.

**STAJŠIĆ, V.; WALSH, NEVILLE G.; DOUGLAS, R.; MESSINA, ANDRE; MOLLOY, B. P. J. (2014):**

**A Revision of *Melicytus* (Violaceae) in mainland Australia and Tasmania.**

In: *Australian Systematic Botany* 27 (4), p. 305–323. DOI: 10.1071/SB14022.

**TOKUOKA, TORU (2008):**

**Molecular phylogenetic Analysis of Violaceae (Malpighiales) based on Plastid and  
nuclear DNA Sequences.**

In: *Journal of Plant Research* 121 (3), p. 253–260. DOI: 10.1007/s10265-008-0153-0.

**WAHLERT, GREGORY A.; MARCUSSEN, THOMAS; PAULA-SOUSA, JULIANA; FENG, MIN; BALLARD, HARVEY EUGENE (2014):  
A Phylogeny of the Violaceae (Malpighiales) inferred from Plastid DNA Sequences:  
Implications for Generic Diversity and Intrafamilial Classification.**

In: *Systematic Botany* 39 (1), p. 239–252. DOI: 10.1600/036364414X678008.

**YOO, KI-OUG; JANG, SU-KIL (2010):**

**Infrageneric Relationships of Korean *Viola* based on eight Chloroplast Markers.**

In: *Journal of Systematics and Evolution* 48 (6), p. 474–481. DOI: 10.1111/j.1759-6831.2010.00102.x.

## Viscaceae

**MOLVRAJ, MIA; KORES, PAUL J.; CHASE, MARK W. (1999):**

**Phylogenetic Relationships within *Korthalsella* (Viscaceae) based on Nuclear ITS and  
Plastid TrnL-f Sequence Data.**

In: *American Journal of Botany* 86 (2), p. 249–260.

**NICKRENT, DANIEL LEE; GARCÍA, MIGUEL Á.; MARTÍN, MARÍA P.; MATHIASSEN, ROBERT L. (2004):**

**A Phylogeny of all Species of *Arceuthobium* (Viscaceae) using Nuclear and  
Chloroplast DNA Sequences.**

In: *American Journal of Botany* 91 (1), p. 125–138.

## Vitaceae

**CHEN, PING-TING; CHEN, LONG-QING; WEN, JUN (2011):**

**The first phylogenetic Analysis of *Tetrastigma* (Miq.) Planch., the host of Rafflesiaceae.**

In: *Taxon* 60 (2), p. 499–512.

**INGROUILLE, MARTIN J.; CHASE, MARK W.; FAY, MICHAEL F.; BOWMAN, DIANE; VAN DER BANK, MICHELLE; BRUIJN, ANETTE D.E. (2002):**

**Systematics of Vitaceae from the Viewpoint of Plastid *rbcL* DNA Sequence Data.**

In: *Botanical Journal of the Linnean Society* 138 (421–432).

**JANSEN, ROBERT K.; KAITTANIS, CHARALAMBOS; SASKI, CHRISTOPHER; LEE, SEUNG-BUM; TOMKINS, JEFFREY; ALVERSON, ANDREW J.; DANIELL, HENRY (2006):**

**Phylogenetic Analyses of *Vitis* (Vitaceae) based on complete Chloroplast Genome Sequences: effects of Taxon Sampling and phylogenetic methods on resolving Relationships among Rosids.**

In: *BMC Evolutionary Biology* 6, p. 32. DOI: 10.1186/1471-2148-6-32.

**LIU, XIU-QUN; ICKERT-BOND, STEFANIE M.; CHEN, LONG-QING; WEN, JUN (2013):**

**Molecular Phylogeny of *Cissus* L. of Vitaceae (the grape Family) and Evolution of its pantropical intercontinental Disjunctions.**

In: *Molecular Phylogenetics and Evolution* 66 (1), p. 43–53. DOI: 10.1016/j.ympev.2012.09.003.

**LU, LIMIN; COX, CYMON J.; MATHEWS, SARAH; WANG, WEI; WEN, JUN; CHEN, ZHI-DUAN (2018):**

**Optimal Data Partitioning, multispecies Coalescent and Bayesian Concordance Analyses resolve early Divergences of the grape Family (Vitaceae).**

In: *Cladistics* 34 (1), p. 57–77. DOI: 10.1111/cla.12191.

**LU, LIMIN; WANG, WEI; CHEN, ZHI-DUAN; WEN, JUN (2013):**

**Phylogeny of the non-monophyletic *Cayratia* Juss. (Vitaceae) and Implications for Character Evolution and Biogeography.**

In: *Molecular Phylogenetics and Evolution* 68 (3), p. 502–515. DOI: 10.1016/j.ympev.2013.04.023.

**LU, LIMIN; WEN, JUN; CHEN, ZHI-DUAN (2012):**

**A combined morphological and molecular phylogenetic Analysis of *Parthenocissus* (Vitaceae) and taxonomic Implications.**

In: *Botanical Journal of the Linnean Society* 168, p. 43–63.

**MOLINA, JEANMAIRE E.; WEN, JUN; STRUWE, LENA (2013):**

**Systematics and Biogeography of the non-viny Grape relative *Leea* (Vitaceae).**

In: *Botanical Journal of the Linnean Society* 171, p. 354–376.

**NIE, ZE-LONG; SUN, HANG; CHEN, ZHI-DUAN; MENG, YING; MANCHESTER, STEVEN R.; WEN, JUN (2010):**

**Molecular Phylogeny and biogeographic Diversification of *Parthenocissus* (Vitaceae) disjunct between Asia and North America.**

In: *American Journal of Botany* 97 (8), p. 1342–1353. DOI: 10.3732/ajb.1000085.

**NIE, ZE-LONG; SUN, HANG; MANCHESTER, STEVEN R.; MENG, YING; LUKE, QUENTIN; WEN, JUN (2012):**

**Evolution of the intercontinental disjunctions in six Continents in the *Ampelopsis* Clade of the Grape Family (Vitaceae).**

In: *BMC Evolutionary Biology* 12, p. 17. DOI: 10.1186/1471-2148-12-17.

**PELSER, PIETER B.; NICKRENT, DANIEL LEE; BARCELONA, JULIE F. (2016):**

**Untangling a Vine and its Parasite: Host specificity of Philippine *Rafflesia* (Rafflesiaceae).**

In: *Taxon* 65 (4), p. 739–758. DOI: 10.12705/654.4.

- REN, HUI; LU, LI-MIN; SOEJIMA, AKIKO; LUKE, QUENTIN; ZHANG, DIAN-XIANG; CHEN, ZHI-DUAN; WEN, JUN (2011):  
**Phylogenetic Analysis of the grape Family (Vitaceae) based on the noncoding Plastid trnC-petN, trnH-psbA, and trnL-F Sequences.**  
In: *Taxon* 60 (3), p. 629–637.
- RODRIGUES, JACQUELINE GOMES; LOMBARDI, JULIO ANTONIO; LOVATO, MARIA BERNADETE (2014):  
**Phylogeny of *Cissus* (Vitaceae) focusing on South American Species.**  
In: *Taxon* 63 (2), p. 287–298. DOI: 10.12705/632.33.
- ROSSETTO, MAURIZIO; CRAYN, DARREN M.; JACKES, BETSY R.; PORTER, CAROLYN (2007):  
**An updated estimate of intergeneric phylogenetic Relationships in the Australian Vitaceae.**  
In: *Canadian Journal of Botany* 85 (8), p. 722–730. DOI: 10.1139/B07-022.
- SOEJIMA, AKIKO; WEN, JUN (2006):  
**Phylogenetic Analysis of the Grape Family (Vitaceae) based on three Chloroplast Markers.**  
In: *American Journal of Botany* 93 (2), p. 278–287.
- TRIAS-BLASI, ANNA; CHAYAMARIT, KONGKANDA; TEERAWATANANON, ATCHARA; PARNELL, JOHN A.N. (2014):  
**A taxonomic Revision of *Pterisanthes* (Vitaceae) in Thailand and a new Thai Record for *Pterisanthes cissioides*.**  
In: *Phytotaxa* 159 (2), p. 95. DOI: 10.11646/phytotaxa.159.2.3.
- TRÖNDLE, DOROTHEE; SCHRÖDER, STEPHAN; KASSEMAYER, HANNS-HEINZ; KIEFER, CHRISTIANE; KOCH, MARCUS A.; NICK, PETER (2010):  
**Molecular Phylogeny of the Genus *Vitis* (Vitaceae) based on Plastid Markers.**  
In: *American Journal of Botany* 97 (7), p. 1168–1178. DOI: 10.3732/ajb.0900218.
- WAN, YIZHEN; SCHWANINGER, HEIDI R.; BALDO, ANGELA M.; LABATE, JOANNE A.; ZHONG, GAN-YUAN; SIMON, CHARLES J. (2013):  
**A phylogenetic Analysis of the grape Genus (*Vitis* L.) reveals broad Reticulation and concurrent Diversification during Neogene and Quaternary Climate Change.**  
In: *BMC Evolutionary Biology* 13, p. 141. DOI: 10.1186/1471-2148-13-141.
- WEN, JUN; NIE, ZE-LONG; SOEJIMA, AKIKO; MENG, YING (2007):  
**Phylogeny of Vitaceae based on the nuclear Gai1 Gene Sequences.**  
In: *Canadian Journal of Botany* 85 (8), p. 731–745. DOI: 10.1139/B07-071.
- ZECCA, GIOVANNI; ABBOTT, RICHARD J.; SUN, WEI-BANG; SPADA, ALBERTO; SALA, FRANCESCO; GRASSI, FABRIZIO (2012):  
**The timing and the Mode of Evolution of wild Grapes (*Vitis*).**  
In: *Molecular Phylogenetics and Evolution* 62 (2), p. 736–747. DOI: 10.1016/j.ympev.2011.11.015.
- ZHANG, NING; WEN, JUN; ZIMMER, ELIZABETH A. (2015):  
**Expression Patterns of AP1, FUL, FT and leafy Orthologs in Vitaceae support the Homology of Tendrils and Inflorescences throughout the Grape Family.**  
In: *Journal of Systematics and Evolution* 53 (5), p. 469–476. DOI: 10.1111/jse.12138.
- ZHANG, NING; WEN, JUN; ZIMMER, ELIZABETH A. (2016):  
**Another Look at the phylogenetic Position of the Grape Order Vitales: Chloroplast phylogenomics with an expanded Sampling of Key Lineages.**  
In: *Molecular Phylogenetics and Evolution* 101, p. 216–223. DOI: 10.1016/j.ympev.2016.04.034.

## Vochysiaceae

SYTSMA, KENNETH J.; LITT, AMY; ZJHRA, MICHELLE L.; CHRIS PIRES, J.; NEPOKROEFF, MOLLY; CONTI, ELENA ET AL. (2004):

**Clades, Clocks, and Continents: Historical and Biogeographical Analysis of Myrtaceae, Vochysiaceae, and Relatives in the Southern Hemisphere.**

In: International Journal of Plant Sciences 165 (S4), S85-S105. DOI: 10.1086/421066.

## Winteraceae

MARQUÍNEZ, XAVIER; LOHMANN, LÚCIA GARCÉS; SALATINO, MARIA LUIZA FARIA; SALATINO, ANTONIO; GONZÁLEZ, FAVIO (2009):

**Generic Relationships and dating of Lineages in Winteraceae based on nuclear (ITS) and Plastid (rpS16 and psbA-trnH) Sequence Data.**

In: Molecular Phylogenetics and Evolution 53 (2), p. 435–449. DOI: 10.1016/j.ympev.2009.07.001.

## Woodsiaceae

CHUNXIANG, LI; SHUGANG, LU; XIAOYAN, SUN; QUN, YANG (2011):

**Phylogenetic Positions of the Enigmatic Asiatic Fern Genera *Diplaziopsis* and *Rhachidosorus* from Analyses of Four Plastid Genes.**

In: American Fern Journal 101 (3), p. 142–155. DOI: 10.1640/0002-8444-101.3.142.

SHAO, YI-ZHEN; WEI, RAN; ZHANG, XIAN-CHUN; XIANG, QIAO PING (2015):

**Molecular Phylogeny of the Cliff Ferns (Woodsiaceae: Polypodiales) with a proposed Infrageneric Classification.**

In: Public Library of Science One 10 (9), e0136318. DOI: 10.1371/journal.pone.0136318.

WEI, RAN; ZHANG, XIAN-CHUN (2014):

**Rediscovery of *Cystoathyrium chinense* Ching (Cystopteridaceae): phylogenetic Placement of the critically endangered Fern Species endemic to China.**

In: Journal of Systematics and Evolution 52 (4), p. 450–457. DOI: 10.1111/jse.12075.

## Xyridaceae

CAMPBELL, LISA M. (2012):

**Pollen Morphology of Xyridaceae Systematic (Poales) and its Potential.**

In: the Botanical Review 78 (4), p. 428–439. DOI: 10.1007/s12229-012-9110-7.

ORIANI, ALINE; SCATENA, VERA LUCIA (2014):

**Ovule, Fruit and Seed development in *Abolboda* (Xyridaceae, Poales): Implications for Taxonomy and Phylogeny.**

In: Botanical Journal of the Linnean Society 175 (1), p. 144–154. DOI: 10.1111/boj.12152.

## Zamiaceae

GONZÁLEZ, DOLORES; VOVIDES, ANDREW P.; BÁRCENAS, CRISTINA (2008):

**Phylogenetic Relationships of the Neotropical Genus *Dioon* (Cycadales, Zamiaceae) based on Nuclear and Chloroplast DNA Sequence Data.**

In: Systematic Botany 33 (2), p. 229–236.

NICOLALDE-MOREJÓN, FERNANDO; VOVIDES, ANDREW P.; STEVENSON, DENNIS WM. (2009):

**Taxonomic Revision of *Zamia* in Mega-Mexico.**

In: Brittonia 61 (4), p. 301–335.

NOLASCO-SOTO, JANET; GONZÁLEZ-ASTORGA, JORGE; NICOLALDE-MOREJÓN, FERNANDO; VERGARA-SILVA, FRANCISCO; LOS MONTEROS, ALEJANDRO ESPINOSA; MEDINA-VILLARREAL, ANWAR (2015):

**Phylogeography and demographic History of *Zamia paucijuga* Wieland (Zamiaceae), a Cycad Species from the Mexican Pacific Slope.**

In: *Plant Systematics and Evolution* 301 (2), p. 623–637. DOI: 10.1007/s00606-014-1101-1.

**TREUTLEIN, JENS; VORSTER, P.; WINK, MICHAEL (2005):**

**Molecular Relationships in *Encephalartos* (Zamiaceae, Cycadales) based on Nucleotide Sequences of nuclear ITS 1&2, *rbcl*, and genomic I SSR Fingerprinting.**

In: *Plant Biology* 7 (1), p. 79–90. DOI: 10.1055/s-2004-830478.

**VOVIDES, ANDREW P.; GONZÁLEZ, DOLORES; PÉREZ-FARRERA, MIGUEL ANGEL; AVENDAÑO, SERGIO; BÁRCENAS, CRISTINA (2004):**

**A Review of research on the *Cycad* Genus *Ceratozamia* Brongn. (Zamiaceae) in Mexico.**

In: *Taxon* 53 (2), p. 291–297.

## Zingiberaceae

**BENEDICT, JOHN C.; SMITH, SELINA Y.; COLLINSON, MARGARET E.; LEONG-ŠKORNIČKOVÁ, JANA; SPECHT, CHELSEA D.; MARONE, FEDERICA ET AL. (2015):**

**Seed Morphology and Anatomy and its utility in recognizing Subfamilies and Tribes of Zingiberaceae.**

In: *American Journal of Botany* 102 (11), p. 1814–1841. DOI: 10.3732/ajb.1500300.

**DROOP, A. J.; NEWMAN, MARK F. (2014):**

**A Revision of *Amomum* (Zingiberaceae) in Sumatra.**

In: *Edinburgh Journal of Botany* 71 (02), p. 193–258. DOI: 10.1017/S0960428614000043.

**FUNAKOSHI, HIDENOBU; KRESS, W. JOHN; SKORNICKOVA, JANA; LIU, AI-ZHONG; INOUE, KEN (2005):**

**Return from the Lost: Rediscovery of the Presumed extinct *Leptosolen* (Zingiberaceae) of the Philippines and its phylogenetic Placement in Gingers.**

In: *Acta Phytotaxonomica Geobotanica* 56 (1), p. 41–53.

**GAO, LI-XIA; HU, XIU; LIU, NIAN; BANG-HAI; LI, HUANG ZHENG-JUN; LI, YAN (2008):**

**Cluster Analysis of Chinese *Hedychium* based on SRAP Markers.**

In: *Journal of Systematics and Evolution* 46 (6), p. 899–905.

**JULIUS, AVELINAH; SULEIMAN, MONICA; TAKANO, ATSUKO; NAGAMASU, HIDETOSHI (2008):**

**Preliminary molecular Phylogeny of Bornean *Plagiostachys* (Zingiberaceae) based on DNA Sequence Data of Internal Transcribed Spacer (ITS).**

In: *Journal of Tropical Biology and Conservation* 4 (1), p. 67–80.

**KAEWSRI, WITTAYA; PAISOOKSANTIVATANA, YINGYONG; VEESOMMAI, UAMPORN; EIADTHONG, WICHAN; VAJRODAYA, SRUNYA (2007):**

**Phylogenetic Analysis of Thai *Amomum* (Alpinioideae: Zingiberaceae) using AFLP Markers.**

In: *Kasetsart Journal - Natural Science* 41, p. 213–226.

**KRESS, W. JOHN; LIU, AI-ZHONG; NEWMAN, MARK F.; LI, QING-JUN (2005):**

**The molecular Phylogeny of *Alpinia* (Zingiberaceae): a complex and polyphyletic Genus of Gingers.**

In: *American Journal of Botany* 92 (1), p. 167–178. DOI: 10.3732/ajb.92.1.167.

**KRESS, W. JOHN; PRINCE, LINDA M.; WILLIAMS, KYLE J. (2002):**

**The Phylogeny and a new Classification of the Gingers (Zingiberaceae): Evidence from molecular Data.**

In: *American Journal of Botany* 89 (10), p. 1682–1696. DOI: 10.3732/ajb.89.10.1682.

**LAMXAY, VICHITH; NEWMAN, MARK F. (2012):**

- A Revision of *Amomum* (Zingiberaceae) in Cambodia, Laos and Vietnam.**  
In: Edinburgh Journal of Botany 69 (01), p. 99–206. DOI: 10.1017/S0960428611000436.
- LEONG-ŠKORNIČKOVÁ, JANA; ŠÍDA, OTAKAR; ZÁVESKÁ, ELIŠKA; MARHOLD, KAROL (2015):**  
**History of infrageneric Classification, typification of supraspecific Names and outstanding Transfers in *Curcuma* (Zingiberaceae).**  
In: Taxon 64 (2), p. 362–373. DOI: 10.12705/642.11.
- PEDERSEN, L. B. (2004):**  
**Phylogenetic Analysis of the Subfamily Alpinioideae (Zingiberaceae), particularly *Etlingeria* Giseke, based on nuclear and Plastid DNA.**  
In: Plant Systematics and Evolution 245 (3-4), p. 239–258. DOI: 10.1007/s00606-004-0126-2.
- SÄRKINEN, TIINA E.; NEWMAN, MARK F.; MAAS, PAUL J.M.; MAAS, HILTJE; POULSEN, AXEL D.; HARRIS, DAVID J. ET AL. (2007):**  
**Recent oceanic long-distance Dispersal and Divergence in the amphi-Atlantic Rain Forest Genus *Renealmia* L.f. (Zingiberaceae).**  
In: Molecular Phylogenetics and Evolution 44 (3), p. 968–980. DOI: 10.1016/j.ympev.2007.06.007.
- TAKANO, ATSUKO; NAGAMASU, HIDETOSHI (2007):**  
***Myxochlamys* (Zingiberaceae), a new Genus from Borneo.**  
In: Acta Phytotaxonomica Geobotanica 58 (1), p. 19–32.
- TAKANO, ATSUKO; OKADA, HIROSHI (2002):**  
**Multiple occurrences of triploid Formation in *Globba* (Zingiberaceae) from molecular Evidence.**  
In: Plant Systematics and Evolution 230 (3-4), p. 143–159. DOI: 10.1007/s006060200001.
- TECHAPRASAN, JIRANAN; LEONG-ŠKORNIČKOVÁ, JANA (2011):**  
**Transfer of *Kaempferia candida* to *Curcuma* (Zingiberaceae) based on morphological and molecular Data.**  
In: Nordic Journal of Botany 29 (6), p. 773–779. DOI: 10.1111/j.1756-1051.2011.00970.x.
- VALDERRAMA, EUGENIO; RICHARDSON, JAMES E.; KIDNER, CATHERINE ANNE; MADRIÑÁN, SANTIAGO; STONE, GRAHAM N. (2018):**  
**Transcriptome mining for phylogenetic Markers in a recently radiated Genus of tropical plants (*Renealmia* L.f., Zingiberaceae).**  
In: Molecular Phylogenetics and Evolution 119, p. 13–24. DOI: 10.1016/j.ympev.2017.10.001.
- WILLIAMS, KYLE J.; KRESS, W. JOHN; MANOS, PAUL P. (2004):**  
**The Phylogeny, Evolution, and Classification of the Genus *Globba* and Tribe Globbeae (Zingiberaceae): Appendages do matter.**  
In: American Journal of Botany 91 (1), p. 100–114. DOI: 10.3732/ajb.91.1.100.
- WOOD, T. H.; WHITTEN, WILLIAM MARK; WILLIAMS, NORRIS H. (2000):**  
**Phylogeny of *Hedychium* and related Genera (Zingiberaceae) based on ITS Sequence Data.**  
In: Edinburgh Journal of Botany 57 (2), p. 261–270. DOI: 10.1017/S0960428600000196.
- XIA, YONG-MEI; KRESS, W. JOHN; PRINCE, LINDA M. (2004):**  
**Phylogenetic Analyses of *Amomum* (Alpinioideae: Zingiberaceae) using ITS and matK DNA Sequence Data.**  
In: Systematic Botany 29 (2), p. 334–344.
- ZÁVESKÁ, ELIŠKA; FÉR, TOMÁŠ; ŠÍDA, OTAKAR; KRAK, KAROL; MARHOLD, KAROL; LEONG-ŠKORNIČKOVÁ, JANA (2012):**

**Phylogeny of *Curcuma* (Zingiberaceae) based on Plastid and nuclear Sequences:  
Proposal of the new Subgenus *Ecomata*.**

In: *Taxon* 61 (4), 747-743.

**ZÁVESKÁ, ELIŠKA; FÉR, TOMÁŠ; ŠÍDA, OTAKAR; MARHOLD, KAROL; LEONG-ŠKORNIČKOVÁ, JANA (2016):  
Hybridization among distantly related species: Examples from the polyploid Genus  
*Curcuma* (Zingiberaceae).**

In: *Molecular Phylogenetics and Evolution* 100, p. 303–321. DOI: 10.1016/j.ympev.2016.04.017.

**ZHAO, JIAN-LI; ZHONG, JIN-SHUN; FAN, YONG-LI; XIA, YONG-MEI; LI, QING-JUN (2017):  
A preliminary species-level Phylogeny of the alpine Ginger *Roscoea* : Implications for  
Speciation.**

In: *Journal of Systematics and Evolution* 55 (3), p. 215–224. DOI: 10.1111/jse.12247.

**ZOU, P. U.; YE, YU-SHI; LIAO, JING-PING (2016):  
*Alpinia austrosinense* (Zingiberaceae), a new Combination from China and its  
Relationship with *A. pumila*.**

In: *Phytotaxa* 255 (2), p. 175. DOI: 10.11646/phytotaxa.255.2.8.

## Zosteraceae

**TANAKA, NORIO; KUO, JOHN; OMORI, YUJI; NAKAOKA, MASAHIRO; AIOI, KEIKO (2003):  
Phylogenetic Relationships in the Genera *Zostera* and *Heterozostera* (Zosteraceae)  
based on matK Sequence Data.**

In: *Journal of Plant Research* 116 (4), p. 273–279. DOI: 10.1007/s10265-003-0090-x.

## Zygophyllaceae

**BEIER, BJÖRN-AXEL; CHASE, MARK W.; THULIN, MATS (2003):  
Phylogenetic Relationships and Taxonomy of Subfamily Zygophylloideae  
(Zygophyllaceae) based on molecular and morphological Data.**

In: *Plant Systematics and Evolution* 240 (1-4), p. 11–39. DOI: 10.1007/s00606-003-0007-0.

**BEIER, BJÖRN-AXEL; NYLANDER, JOHAN A.A.; CHASE, MARK W.; THULIN, MATS (2004):  
Phylogenetic Relationships and Biogeography of the desert plant Genus *Fagonia*  
(Zygophyllaceae), inferred by Parsimony and Bayesian Model Averaging.**

In: *Molecular Phylogenetics and Evolution* 33 (1), p. 91–108. DOI: 10.1016/j.ympev.2004.05.010.

**BELLSTEDT, DIRK U.; VAN ZYL, L.; MARAIS, E. M.; BYTEBIER, BENNY; VILLIERS, C. A.; MAKWARELA, A. M.; DREYER, L. L.  
(2008):**

**Phylogenetic Relationships, Character Evolution and Biogeography of southern  
African members of *Zygophyllum* (Zygophyllaceae) based on three Plastid Regions.**

In: *Molecular Phylogenetics and Evolution* 47 (3), p. 932–949. DOI: 10.1016/j.ympev.2008.02.019.

**LAUTERBACH, MAXIMILIAN; VAN DER MERWE, PIETER DE WET; KEBLER, LISA; PIRIE, MICHAEL D.; BELLSTEDT, DIRK U.;  
KADEREIT, GUDRUN (2016):**

**Evolution of Leaf Anatomy in arid Environments - A case Study in southern African  
*Tetraena* and *Roepera* (Zygophyllaceae).**

In: *Molecular Phylogenetics and Evolution* 97, p. 129–144. DOI: 10.1016/j.ympev.2016.01.002.

**LIA, V. V.; CONFALONIERI, V. A.; COMAS, C. I.; HUNZIKER, J. H. (2001):  
Molecular Phylogeny of *Larrea* and its allies (Zygophyllaceae): reticulate Evolution  
and the probable time of Creosote bush Arrival to North America.**

In: *Molecular Phylogenetics and Evolution* 21 (2), p. 309–320. DOI: 10.1006/mpev.2001.1025.
